# Supplementary material for: Endothelial RNF20 suppresses endothelial-to-mesenchymal transition and safeguards physiological angiocrine signaling to prevent congenital heart disease
Source: Nat Commun. 2025 Oct 27;16:9480. doi: 10.1038/s41467-025-65291-0 (PMC12559710; doi:10.1038/s41467-025-65291-0)
Supplement: Supplementary file 4 — Supplementary Data 1 [file 41467_2025_65291_MOESM4_ESM.xlsx]

## Sheet: Fig3b
Supplementary Data 1. Marker expression in different cardiac cell populations from control and Isl1cre/+Rnf20fl/fl embryos.
pval	avg_log2FC	pct.1	pct.2	pvaladj	gene	CELL_TYPE	Test_used	fc.threshold (log2)	min.pct (%)
0	1.83063	0.998	0.981	0	Actc1	CM1	Two-sided Wilcoxon test	0.25	25
0	1.70576	0.96	0.873	0	Myl7	CM1	Two-sided Wilcoxon test	0.25	25
0	1.64553	0.882	0.543	0	Ttn	CM1	Two-sided Wilcoxon test	0.25	25
0	1.607	0.89	0.663	0	Tnnt2	CM1	Two-sided Wilcoxon test	0.25	25
0	1.58601	0.965	0.851	0	Myl4	CM1	Two-sided Wilcoxon test	0.25	25
0	1.48484	0.929	0.827	0	Acta2	CM1	Two-sided Wilcoxon test	0.25	25
0	1.48218	0.813	0.554	0	Tnnc1	CM1	Two-sided Wilcoxon test	0.25	25
0	1.4539	0.994	0.957	0	Tpm1	CM1	Two-sided Wilcoxon test	0.25	25
0	1.4486	0.668	0.288	0	Myh6	CM1	Two-sided Wilcoxon test	0.25	25
0	1.36735	0.7	0.423	0	Myl9	CM1	Two-sided Wilcoxon test	0.25	25
0	1.34361	0.848	0.424	0	Slc8a1	CM1	Two-sided Wilcoxon test	0.25	25
0	1.32768	0.835	0.623	0	Myl3	CM1	Two-sided Wilcoxon test	0.25	25
0	1.25636	0.659	0.387	0	Csrp3	CM1	Two-sided Wilcoxon test	0.25	25
2.18058e-303	1.22978	0.598	0.332	5.07444e-299	Sh3bgr	CM1	Two-sided Wilcoxon test	0.25	25
3.51753e-240	1.19629	0.742	0.556	8.18564e-236	Myl2	CM1	Two-sided Wilcoxon test	0.25	25
1.02299e-256	1.19383	0.504	0.257	2.38061e-252	Ankrd1	CM1	Two-sided Wilcoxon test	0.25	25
3.40096e-267	1.18791	0.471	0.213	7.91438e-263	Myh7	CM1	Two-sided Wilcoxon test	0.25	25
0	1.14734	0.736	0.519	0	Hspb1	CM1	Two-sided Wilcoxon test	0.25	25
1.95398e-302	1.1351	0.577	0.308	4.54712e-298	Tnni3	CM1	Two-sided Wilcoxon test	0.25	25
0	1.10951	0.588	0.264	0	Nebl	CM1	Two-sided Wilcoxon test	0.25	25
1.81768e-92	1.10772	0.512	0.396	4.22991e-88	Nppa	CM1	Two-sided Wilcoxon test	0.25	25
8.58175e-302	1.10682	0.781	0.606	1.99706e-297	Tnni1	CM1	Two-sided Wilcoxon test	0.25	25
0	1.07769	0.416	0.132	0	5430431A17Rik	CM1	Two-sided Wilcoxon test	0.25	25
4.05093e-153	1.02889	0.418	0.235	9.42691e-149	Acta1	CM1	Two-sided Wilcoxon test	0.25	25
0	1.02589	0.664	0.233	0	Ryr2	CM1	Two-sided Wilcoxon test	0.25	25
5.77432e-272	0.998125	0.568	0.304	1.34374e-267	Nexn	CM1	Two-sided Wilcoxon test	0.25	25
5.36917e-159	0.987955	0.463	0.282	1.24946e-154	Cryab	CM1	Two-sided Wilcoxon test	0.25	25
2.75155e-187	0.923231	0.38	0.177	6.40314e-183	Myl1	CM1	Two-sided Wilcoxon test	0.25	25
4.60366e-154	0.920634	0.61	0.469	1.07132e-149	Gyg	CM1	Two-sided Wilcoxon test	0.25	25
2.44758e-252	0.917882	0.893	0.818	5.69577e-248	Slc25a4	CM1	Two-sided Wilcoxon test	0.25	25
3.03438e-156	0.858068	0.676	0.549	7.06131e-152	Crip2	CM1	Two-sided Wilcoxon test	0.25	25
3.29693e-181	0.857737	0.372	0.175	7.67228e-177	Pgam2	CM1	Two-sided Wilcoxon test	0.25	25
8.9991e-198	0.852455	0.556	0.34	2.09418e-193	Pam	CM1	Two-sided Wilcoxon test	0.25	25
9.54032e-167	0.846277	0.435	0.24	2.22013e-162	Des	CM1	Two-sided Wilcoxon test	0.25	25
8.42885e-264	0.820535	0.586	0.324	1.96148e-259	Palld	CM1	Two-sided Wilcoxon test	0.25	25
0	0.818214	0.519	0.209	0	Cacnb2	CM1	Two-sided Wilcoxon test	0.25	25
8.17988e-165	0.780991	0.403	0.208	1.90354e-160	Atp1b1	CM1	Two-sided Wilcoxon test	0.25	25
0	0.765909	0.596	0.257	0	Erbb4	CM1	Two-sided Wilcoxon test	0.25	25
3.60804e-234	0.750564	0.375	0.146	8.39627e-230	Actn2	CM1	Two-sided Wilcoxon test	0.25	25
1.0847e-130	0.739208	0.294	0.137	2.5242e-126	Smpx	CM1	Two-sided Wilcoxon test	0.25	25
3.77185e-230	0.73264	0.351	0.133	8.77748e-226	Trim55	CM1	Two-sided Wilcoxon test	0.25	25
7.46746e-92	0.714966	0.492	0.385	1.73775e-87	Chchd10	CM1	Two-sided Wilcoxon test	0.25	25
6.95554e-108	0.708293	0.345	0.196	1.61862e-103	Fabp3	CM1	Two-sided Wilcoxon test	0.25	25
4.26464e-304	0.706164	0.448	0.169	9.92424e-300	Cacna1c	CM1	Two-sided Wilcoxon test	0.25	25
2.93671e-96	0.705359	0.616	0.506	6.83402e-92	Tagln	CM1	Two-sided Wilcoxon test	0.25	25
2.66675e-268	0.696744	0.465	0.193	6.20581e-264	Ctnna3	CM1	Two-sided Wilcoxon test	0.25	25
5.45721e-131	0.69319	0.335	0.167	1.26995e-126	Ppp1r14c	CM1	Two-sided Wilcoxon test	0.25	25
5.22068e-147	0.671088	0.316	0.144	1.2149e-142	Nkx2-5	CM1	Two-sided Wilcoxon test	0.25	25
1.39894e-81	0.663096	0.33	0.205	3.25547e-77	Gpx3	CM1	Two-sided Wilcoxon test	0.25	25
3.42928e-200	0.654904	0.386	0.168	7.98028e-196	Pakap	CM1	Two-sided Wilcoxon test	0.25	25
1.62323e-113	0.652247	0.307	0.156	3.77742e-109	Cox6a2	CM1	Two-sided Wilcoxon test	0.25	25
4.37584e-181	0.649898	0.297	0.113	1.0183e-176	Mybpc3	CM1	Two-sided Wilcoxon test	0.25	25
6.7648e-87	0.634393	0.696	0.645	1.57424e-82	Csrp2	CM1	Two-sided Wilcoxon test	0.25	25
4.81868e-207	0.626797	0.262	0.084	1.12136e-202	Asb2	CM1	Two-sided Wilcoxon test	0.25	25
1.4635e-62	0.623404	0.668	0.636	3.40571e-58	Dstn	CM1	Two-sided Wilcoxon test	0.25	25
2.67001e-147	0.612943	0.303	0.132	6.21338e-143	Rbm24	CM1	Two-sided Wilcoxon test	0.25	25
2.41104e-161	0.612327	0.282	0.113	5.61074e-157	Unc45b	CM1	Two-sided Wilcoxon test	0.25	25
2.91773e-180	0.603689	0.297	0.112	6.78985e-176	Rbm20	CM1	Two-sided Wilcoxon test	0.25	25
4.1354e-92	0.595406	0.462	0.33	9.6235e-88	Pdlim5	CM1	Two-sided Wilcoxon test	0.25	25
3.00375e-104	0.588904	0.518	0.378	6.99002e-100	Ccdc141	CM1	Two-sided Wilcoxon test	0.25	25
6.97907e-145	0.587866	0.271	0.109	1.6241e-140	Kcnh7	CM1	Two-sided Wilcoxon test	0.25	25
1.14507e-175	0.585051	0.302	0.117	2.6647e-171	Myom1	CM1	Two-sided Wilcoxon test	0.25	25
7.81253e-118	0.583969	0.257	0.115	1.81805e-113	Hspb2	CM1	Two-sided Wilcoxon test	0.25	25
1.78492e-134	0.573837	0.376	0.193	4.15369e-130	Sorbs2	CM1	Two-sided Wilcoxon test	0.25	25
8.94151e-109	0.569755	0.846	0.847	2.08078e-104	Aldoa	CM1	Two-sided Wilcoxon test	0.25	25
1.16958e-61	0.557732	0.564	0.51	2.72174e-57	Atp2a2	CM1	Two-sided Wilcoxon test	0.25	25
1.97177e-54	0.546208	0.575	0.549	4.5885e-50	Gpi1	CM1	Two-sided Wilcoxon test	0.25	25
1.82639e-145	0.538187	0.99	0.993	4.25018e-141	Gapdh	CM1	Two-sided Wilcoxon test	0.25	25
1.51763e-105	0.533064	0.799	0.784	3.53168e-101	Tpi1	CM1	Two-sided Wilcoxon test	0.25	25
2.47615e-87	0.526828	0.255	0.131	5.76224e-83	Dmd	CM1	Two-sided Wilcoxon test	0.25	25
1.05107e-53	0.521245	0.55	0.5	2.44594e-49	Slc2a1	CM1	Two-sided Wilcoxon test	0.25	25
6.92191e-37	0.517787	0.31	0.237	1.6108e-32	Homer2	CM1	Two-sided Wilcoxon test	0.25	25
2.67724e-104	0.51218	0.263	0.126	6.2302e-100	Cap2	CM1	Two-sided Wilcoxon test	0.25	25
1.34707e-97	0.509934	0.879	0.874	3.13476e-93	Ldha	CM1	Two-sided Wilcoxon test	0.25	25
5.73455e-115	0.505611	0.45	0.278	1.33449e-110	Ank3	CM1	Two-sided Wilcoxon test	0.25	25
1.51882e-62	0.487817	0.711	0.679	3.53444e-58	Eno1	CM1	Two-sided Wilcoxon test	0.25	25
5.82469e-111	0.485539	0.862	0.854	1.35546e-106	Atp5o	CM1	Two-sided Wilcoxon test	0.25	25
4.45695e-102	0.485057	0.657	0.505	1.03718e-97	Rbpms	CM1	Two-sided Wilcoxon test	0.25	25
3.79585e-16	0.475553	0.395	0.393	8.83332e-12	Hcfc1r1	CM1	Two-sided Wilcoxon test	0.25	25
1.93961e-48	0.470091	0.26	0.168	4.51367e-44	Eno3	CM1	Two-sided Wilcoxon test	0.25	25
3.11436e-99	0.468098	0.844	0.834	7.24743e-95	Cox5a	CM1	Two-sided Wilcoxon test	0.25	25
3.36403e-79	0.466894	0.729	0.717	7.82843e-75	Atp5g3	CM1	Two-sided Wilcoxon test	0.25	25
6.09602e-53	0.460147	0.25	0.156	1.4186e-48	Rbpms2	CM1	Two-sided Wilcoxon test	0.25	25
2.48362e-34	0.459998	0.535	0.5	5.77963e-30	Idh2	CM1	Two-sided Wilcoxon test	0.25	25
4.24374e-22	0.456732	0.48	0.487	9.87561e-18	Mdh1	CM1	Two-sided Wilcoxon test	0.25	25
7.09888e-45	0.453069	0.658	0.672	1.65198e-40	Cycs	CM1	Two-sided Wilcoxon test	0.25	25
2.21158e-52	0.452769	0.754	0.731	5.14658e-48	Pgam1	CM1	Two-sided Wilcoxon test	0.25	25
3.11438e-68	0.449457	0.357	0.234	7.24748e-64	Pakap.1	CM1	Two-sided Wilcoxon test	0.25	25
5.4532e-54	0.439346	0.359	0.249	1.26901e-49	Mpped2	CM1	Two-sided Wilcoxon test	0.25	25
6.45735e-59	0.434855	0.74	0.727	1.50269e-54	Pgk1	CM1	Two-sided Wilcoxon test	0.25	25
1.53322e-82	0.42827	0.904	0.914	3.56795e-78	Myl6	CM1	Two-sided Wilcoxon test	0.25	25
9.16166e-25	0.413187	0.511	0.492	2.13201e-20	Bex4	CM1	Two-sided Wilcoxon test	0.25	25
7.76435e-25	0.409647	0.388	0.336	1.80684e-20	Ckb	CM1	Two-sided Wilcoxon test	0.25	25
8.9162e-33	0.408642	0.321	0.247	2.07489e-28	Lrrfip1	CM1	Two-sided Wilcoxon test	0.25	25
1.56201e-22	0.4075	0.357	0.316	3.63495e-18	Tmod1	CM1	Two-sided Wilcoxon test	0.25	25
1.38578e-101	0.403942	0.925	0.926	3.22484e-97	Atp5b	CM1	Two-sided Wilcoxon test	0.25	25
2.4555e-56	0.397128	0.794	0.801	5.7142e-52	Atp5g1	CM1	Two-sided Wilcoxon test	0.25	25
7.50983e-22	0.381172	0.568	0.614	1.74761e-17	Cyc1	CM1	Two-sided Wilcoxon test	0.25	25
5.25837e-12	0.377998	0.258	0.231	1.22367e-07	Got1	CM1	Two-sided Wilcoxon test	0.25	25
9.47898e-06	0.377907	0.279	0.283	0.220585	Idh3a	CM1	Two-sided Wilcoxon test	0.25	25
4.99456e-11	0.374298	0.335	0.326	1.16228e-06	Hacd1	CM1	Two-sided Wilcoxon test	0.25	25
1.56547e-17	0.367687	0.515	0.554	3.643e-13	Uqcrfs1	CM1	Two-sided Wilcoxon test	0.25	25
3.12831e-50	0.362124	0.283	0.179	7.27988e-46	Sdk1	CM1	Two-sided Wilcoxon test	0.25	25
1.58231e-36	0.352679	0.357	0.269	3.68219e-32	Mef2c	CM1	Two-sided Wilcoxon test	0.25	25
3.07714e-11	0.352645	0.263	0.238	7.16081e-07	Vegfb	CM1	Two-sided Wilcoxon test	0.25	25
2.24884e-22	0.351341	0.533	0.549	5.23328e-18	Etfb	CM1	Two-sided Wilcoxon test	0.25	25
1.90928e-60	0.34327	0.889	0.895	4.44309e-56	Mif	CM1	Two-sided Wilcoxon test	0.25	25
6.23885e-121	0.334521	1	1	1.45184e-116	Gm42418	CM1	Two-sided Wilcoxon test	0.25	25
6.43943e-18	0.33145	0.462	0.418	1.49852e-13	Igfbp5	CM1	Two-sided Wilcoxon test	0.25	25
8.46947e-77	0.330795	0.435	0.28	1.97093e-72	Pcdh7	CM1	Two-sided Wilcoxon test	0.25	25
5.53897e-12	0.328616	0.326	0.296	1.28897e-07	Cnn2	CM1	Two-sided Wilcoxon test	0.25	25
8.44642e-08	0.328078	0.286	0.273	0.00196557	Add3	CM1	Two-sided Wilcoxon test	0.25	25
7.52051e-11	0.32582	0.252	0.222	1.7501e-06	Pgm1	CM1	Two-sided Wilcoxon test	0.25	25
2.28808e-10	0.320343	0.475	0.501	5.3246e-06	Cst3	CM1	Two-sided Wilcoxon test	0.25	25
6.07915e-10	0.319111	0.498	0.533	1.41468e-05	Abracl	CM1	Two-sided Wilcoxon test	0.25	25
3.15049e-08	0.318679	0.343	0.337	0.000733151	Pdlim7	CM1	Two-sided Wilcoxon test	0.25	25
5.65171e-36	0.317781	0.73	0.763	1.31521e-31	Mdh2	CM1	Two-sided Wilcoxon test	0.25	25
1.46529e-15	0.313892	0.294	0.25	3.40988e-11	Stk39	CM1	Two-sided Wilcoxon test	0.25	25
2.59797e-48	0.313534	0.834	0.862	6.04573e-44	Atp5a1	CM1	Two-sided Wilcoxon test	0.25	25
1.05332e-11	0.31322	0.339	0.311	2.45118e-07	Ldhb	CM1	Two-sided Wilcoxon test	0.25	25
8.6444e-18	0.307214	0.636	0.661	2.01164e-13	Fkbp1a	CM1	Two-sided Wilcoxon test	0.25	25
1.08283e-33	0.306744	0.664	0.688	2.51985e-29	Ndufa12	CM1	Two-sided Wilcoxon test	0.25	25
1.95672e-29	0.303769	0.665	0.693	4.55349e-25	Ndufab1	CM1	Two-sided Wilcoxon test	0.25	25
1.08355e-41	0.30138	0.83	0.849	2.52153e-37	Atp5d	CM1	Two-sided Wilcoxon test	0.25	25
1.09078e-12	0.29965	0.519	0.564	2.53835e-08	Mrpl12	CM1	Two-sided Wilcoxon test	0.25	25
3.61249e-25	0.297606	0.535	0.509	8.40663e-21	Qk	CM1	Two-sided Wilcoxon test	0.25	25
1.09088e-78	0.295701	0.967	0.972	2.53858e-74	Cmss1	CM1	Two-sided Wilcoxon test	0.25	25
4.36897e-32	0.295417	0.68	0.71	1.0167e-27	Slc25a5	CM1	Two-sided Wilcoxon test	0.25	25
1.8286e-13	0.294157	0.403	0.373	4.25532e-09	Afdn	CM1	Two-sided Wilcoxon test	0.25	25
5.67682e-30	0.293836	0.794	0.79	1.32105e-25	Pkm	CM1	Two-sided Wilcoxon test	0.25	25
7.69697e-42	0.285319	0.815	0.832	1.79116e-37	Atp5h	CM1	Two-sided Wilcoxon test	0.25	25
1.96539e-14	0.283428	0.613	0.668	4.57367e-10	Uqcr10	CM1	Two-sided Wilcoxon test	0.25	25
5.00143e-08	0.280912	0.531	0.59	0.00116388	Ndufc1	CM1	Two-sided Wilcoxon test	0.25	25
7.52745e-08	0.280167	0.395	0.392	0.00175171	Crip1	CM1	Two-sided Wilcoxon test	0.25	25
6.45502e-11	0.277212	0.601	0.648	1.50215e-06	Vdac1	CM1	Two-sided Wilcoxon test	0.25	25
7.70491e-29	0.276205	0.744	0.778	1.79301e-24	Atp5f1	CM1	Two-sided Wilcoxon test	0.25	25
6.71477e-38	0.275833	0.784	0.76	1.5626e-33	Gm10076	CM1	Two-sided Wilcoxon test	0.25	25
1.29798e-19	0.27543	0.663	0.704	3.02053e-15	Vdac2	CM1	Two-sided Wilcoxon test	0.25	25
2.62815e-21	0.27426	0.684	0.735	6.11596e-17	Atp5c1	CM1	Two-sided Wilcoxon test	0.25	25
7.25536e-27	0.273454	0.727	0.76	1.6884e-22	Atp5j	CM1	Two-sided Wilcoxon test	0.25	25
9.16494e-08	0.270272	0.506	0.55	0.00213277	Fam162a	CM1	Two-sided Wilcoxon test	0.25	25
8.92519e-30	0.269884	0.794	0.822	2.07698e-25	Cox7b	CM1	Two-sided Wilcoxon test	0.25	25
2.86543e-24	0.26886	0.834	0.861	6.66815e-20	Cox8a	CM1	Two-sided Wilcoxon test	0.25	25
5.26977e-12	0.268793	0.273	0.232	1.22633e-07	Arhgap31	CM1	Two-sided Wilcoxon test	0.25	25
1.67061e-10	0.266099	0.514	0.565	3.88767e-06	Ndufv2	CM1	Two-sided Wilcoxon test	0.25	25
9.82478e-70	0.265954	0.997	0.997	2.28632e-65	AY036118	CM1	Two-sided Wilcoxon test	0.25	25
6.7395e-29	0.261197	0.793	0.813	1.56835e-24	Uqcrh	CM1	Two-sided Wilcoxon test	0.25	25
5.32494e-08	0.258737	0.551	0.61	0.00123917	Cox7a2l	CM1	Two-sided Wilcoxon test	0.25	25
1.66807e-06	0.255567	0.475	0.53	0.0388176	Ndufa8	CM1	Two-sided Wilcoxon test	0.25	25
2.59021e-09	0.253757	0.548	0.61	6.02767e-05	Uqcrc2	CM1	Two-sided Wilcoxon test	0.25	25
1.18094e-24	0.251319	0.789	0.831	2.74816e-20	Slc25a3	CM1	Two-sided Wilcoxon test	0.25	25
4.51087e-13	0.251068	0.588	0.642	1.04972e-08	Atp5k	CM1	Two-sided Wilcoxon test	0.25	25
0	1.48112	0.976	0.895	0	Cdkn1c	EndoV	Two-sided Wilcoxon test	0.25	25
0	1.30079	0.723	0.32	0	Ramp2	EndoV	Two-sided Wilcoxon test	0.25	25
0	1.1459	0.489	0.147	0	Plvap	EndoV	Two-sided Wilcoxon test	0.25	25
0	1.14301	0.446	0.117	0	Emcn	EndoV	Two-sided Wilcoxon test	0.25	25
0	1.12556	0.81	0.48	0	Klf2	EndoV	Two-sided Wilcoxon test	0.25	25
0	1.06499	0.983	0.871	0	Vim	EndoV	Two-sided Wilcoxon test	0.25	25
6.24604e-214	1.0119	0.636	0.37	1.45352e-209	Igfbp4	EndoV	Two-sided Wilcoxon test	0.25	25
3.14385e-262	0.974835	0.86	0.65	7.31606e-258	Mest	EndoV	Two-sided Wilcoxon test	0.25	25
7.73712e-196	0.910155	0.682	0.424	1.8005e-191	Apoe	EndoV	Two-sided Wilcoxon test	0.25	25
2.32279e-144	0.868737	0.458	0.254	5.40537e-140	Egfl7	EndoV	Two-sided Wilcoxon test	0.25	25
2.26573e-202	0.820617	0.371	0.136	5.27258e-198	Icam2	EndoV	Two-sided Wilcoxon test	0.25	25
7.75019e-146	0.792022	0.793	0.709	1.80355e-141	Rdx	EndoV	Two-sided Wilcoxon test	0.25	25
9.63195e-125	0.761051	0.337	0.156	2.24145e-120	Cavin2	EndoV	Two-sided Wilcoxon test	0.25	25
8.70817e-183	0.750564	0.883	0.756	2.02648e-178	Igf2	EndoV	Two-sided Wilcoxon test	0.25	25
3.49951e-106	0.721592	0.642	0.505	8.14371e-102	Maged2	EndoV	Two-sided Wilcoxon test	0.25	25
1.98321e-229	0.716959	0.306	0.087	4.61512e-225	Klhl4	EndoV	Two-sided Wilcoxon test	0.25	25
8.21619e-154	0.707142	0.311	0.119	1.91199e-149	Ecscr	EndoV	Two-sided Wilcoxon test	0.25	25
6.54059e-156	0.679758	0.757	0.573	1.52206e-151	Tagln2	EndoV	Two-sided Wilcoxon test	0.25	25
2.05459e-88	0.673321	0.348	0.194	4.78123e-84	Gng11	EndoV	Two-sided Wilcoxon test	0.25	25
5.01288e-216	0.657187	0.976	0.925	1.16655e-211	Tmsb10	EndoV	Two-sided Wilcoxon test	0.25	25
3.63388e-181	0.656988	0.934	0.868	8.4564e-177	Nme2	EndoV	Two-sided Wilcoxon test	0.25	25
9.19546e-140	0.656518	0.252	0.087	2.13988e-135	Irx5	EndoV	Two-sided Wilcoxon test	0.25	25
1.0096e-126	0.648873	0.302	0.125	2.34945e-122	Npr3	EndoV	Two-sided Wilcoxon test	0.25	25
1.33615e-64	0.644264	0.375	0.247	3.10935e-60	Cotl1	EndoV	Two-sided Wilcoxon test	0.25	25
5.11396e-306	0.625645	1	0.999	1.19007e-301	Actb	EndoV	Two-sided Wilcoxon test	0.25	25
1.64064e-92	0.62479	0.662	0.527	3.81794e-88	Cd81	EndoV	Two-sided Wilcoxon test	0.25	25
1.0106e-84	0.608078	0.643	0.478	2.35177e-80	Marcks	EndoV	Two-sided Wilcoxon test	0.25	25
2.32225e-73	0.607705	0.359	0.215	5.4041e-69	Ece1	EndoV	Two-sided Wilcoxon test	0.25	25
6.31973e-110	0.607494	0.279	0.119	1.47066e-105	Gngt2	EndoV	Two-sided Wilcoxon test	0.25	25
7.86441e-77	0.607416	0.539	0.389	1.83013e-72	Ifitm2	EndoV	Two-sided Wilcoxon test	0.25	25
9.23151e-72	0.600521	0.67	0.589	2.14826e-67	Gnai2	EndoV	Two-sided Wilcoxon test	0.25	25
2.26759e-90	0.592689	0.264	0.119	5.2769e-86	Ednrb	EndoV	Two-sided Wilcoxon test	0.25	25
1.79069e-126	0.589545	0.858	0.789	4.1671e-122	H19	EndoV	Two-sided Wilcoxon test	0.25	25
5.59202e-106	0.588326	0.287	0.125	1.30132e-101	Calcrl	EndoV	Two-sided Wilcoxon test	0.25	25
9.61448e-52	0.581469	0.282	0.172	2.23739e-47	Cavin3	EndoV	Two-sided Wilcoxon test	0.25	25
4.06841e-128	0.572322	0.262	0.096	9.4676e-124	Cdh5	EndoV	Two-sided Wilcoxon test	0.25	25
1.01111e-100	0.563053	0.702	0.551	2.35295e-96	Crip2	EndoV	Two-sided Wilcoxon test	0.25	25
1.9103e-92	0.546763	0.288	0.134	4.44545e-88	Pecam1	EndoV	Two-sided Wilcoxon test	0.25	25
2.40652e-51	0.534465	0.292	0.18	5.60021e-47	Arhgdib	EndoV	Two-sided Wilcoxon test	0.25	25
3.3653e-42	0.533615	0.488	0.412	7.83138e-38	Sh3bgrl3	EndoV	Two-sided Wilcoxon test	0.25	25
1.00962e-63	0.524971	0.252	0.133	2.34948e-59	Vamp5	EndoV	Two-sided Wilcoxon test	0.25	25
3.90227e-51	0.52274	0.535	0.439	9.08097e-47	Ctsl	EndoV	Two-sided Wilcoxon test	0.25	25
1.21544e-122	0.51993	0.926	0.884	2.82845e-118	Pfn1	EndoV	Two-sided Wilcoxon test	0.25	25
6.3133e-72	0.514154	0.653	0.499	1.46917e-67	Marcksl1	EndoV	Two-sided Wilcoxon test	0.25	25
3.64074e-46	0.513487	0.324	0.214	8.47237e-42	Cemip2	EndoV	Two-sided Wilcoxon test	0.25	25
6.98542e-170	0.508511	0.989	0.973	1.62558e-165	Ubb	EndoV	Two-sided Wilcoxon test	0.25	25
2.10527e-40	0.504451	0.376	0.281	4.89918e-36	Ralb	EndoV	Two-sided Wilcoxon test	0.25	25
2.23939e-61	0.501603	0.706	0.672	5.21127e-57	Ubc	EndoV	Two-sided Wilcoxon test	0.25	25
3.15222e-39	0.49458	0.377	0.271	7.33553e-35	Col4a1	EndoV	Two-sided Wilcoxon test	0.25	25
2.34539e-91	0.489551	0.568	0.367	5.45797e-87	Hapln1	EndoV	Two-sided Wilcoxon test	0.25	25
9.31493e-182	0.482133	0.991	0.975	2.16768e-177	Actg1	EndoV	Two-sided Wilcoxon test	0.25	25
1.16203e-53	0.47973	0.446	0.311	2.70415e-49	Plagl1	EndoV	Two-sided Wilcoxon test	0.25	25
3.97343e-75	0.469718	0.351	0.191	9.24657e-71	Nrxn3	EndoV	Two-sided Wilcoxon test	0.25	25
5.20477e-55	0.465262	0.705	0.666	1.2112e-50	Clic1	EndoV	Two-sided Wilcoxon test	0.25	25
8.0303e-200	0.461987	0.998	0.996	1.86873e-195	Ppia	EndoV	Two-sided Wilcoxon test	0.25	25
8.53136e-36	0.455615	0.279	0.186	1.98533e-31	Gsta4	EndoV	Two-sided Wilcoxon test	0.25	25
9.58958e-41	0.446321	0.25	0.153	2.23159e-36	Afap1l1	EndoV	Two-sided Wilcoxon test	0.25	25
1.71158e-32	0.444959	0.416	0.33	3.98303e-28	Rhob	EndoV	Two-sided Wilcoxon test	0.25	25
1.77483e-61	0.443554	0.253	0.131	4.13022e-57	Tek	EndoV	Two-sided Wilcoxon test	0.25	25
1.84394e-42	0.440212	0.631	0.581	4.29103e-38	Hmgn2	EndoV	Two-sided Wilcoxon test	0.25	25
3.07498e-23	0.438373	0.294	0.228	7.15579e-19	Tspan6	EndoV	Two-sided Wilcoxon test	0.25	25
1.1541e-42	0.434253	0.639	0.614	2.6857e-38	Pomp	EndoV	Two-sided Wilcoxon test	0.25	25
2.15253e-97	0.432964	0.925	0.902	5.00916e-93	Calm1	EndoV	Two-sided Wilcoxon test	0.25	25
1.00061e-34	0.43238	0.599	0.563	2.32851e-30	Selenoh	EndoV	Two-sided Wilcoxon test	0.25	25
1.25461e-87	0.426301	0.911	0.876	2.91961e-83	Dynll1	EndoV	Two-sided Wilcoxon test	0.25	25
3.33775e-34	0.42506	0.267	0.178	7.76729e-30	Tspan18	EndoV	Two-sided Wilcoxon test	0.25	25
8.85364e-33	0.424638	0.398	0.308	2.06033e-28	Fscn1	EndoV	Two-sided Wilcoxon test	0.25	25
5.02787e-69	0.421972	0.385	0.226	1.17004e-64	Ebf1	EndoV	Two-sided Wilcoxon test	0.25	25
1.44082e-35	0.421668	0.253	0.162	3.35292e-31	Ets1	EndoV	Two-sided Wilcoxon test	0.25	25
2.61173e-65	0.420655	0.821	0.758	6.07775e-61	Gm10076	EndoV	Two-sided Wilcoxon test	0.25	25
1.71891e-31	0.419007	0.574	0.54	4.00007e-27	Kdelr2	EndoV	Two-sided Wilcoxon test	0.25	25
1.82621e-18	0.411671	0.402	0.362	4.24978e-14	Msn	EndoV	Two-sided Wilcoxon test	0.25	25
2.34529e-49	0.411247	0.71	0.674	5.45773e-45	Cdk4	EndoV	Two-sided Wilcoxon test	0.25	25
2.03719e-34	0.410123	0.621	0.62	4.74074e-30	Arpc3	EndoV	Two-sided Wilcoxon test	0.25	25
1.1027e-40	0.410059	0.718	0.708	2.5661e-36	Sfr1	EndoV	Two-sided Wilcoxon test	0.25	25
1.10436e-62	0.405851	0.828	0.801	2.56995e-58	Cfl1	EndoV	Two-sided Wilcoxon test	0.25	25
5.04436e-15	0.405239	0.282	0.239	1.17387e-10	Ccdc85b	EndoV	Two-sided Wilcoxon test	0.25	25
7.96037e-31	0.404547	0.602	0.583	1.85246e-26	Akr1a1	EndoV	Two-sided Wilcoxon test	0.25	25
3.01107e-23	0.403671	0.338	0.271	7.00707e-19	Ppic	EndoV	Two-sided Wilcoxon test	0.25	25
5.7397e-92	0.399143	0.936	0.92	1.33568e-87	Prdx1	EndoV	Two-sided Wilcoxon test	0.25	25
2.81658e-08	0.391742	0.379	0.388	0.000655447	Rab11a	EndoV	Two-sided Wilcoxon test	0.25	25
6.45053e-101	0.390323	0.406	0.211	1.5011e-96	Ptprm	EndoV	Two-sided Wilcoxon test	0.25	25
1.24787e-29	0.388726	0.611	0.61	2.90391e-25	Sf3b5	EndoV	Two-sided Wilcoxon test	0.25	25
6.79104e-57	0.387747	0.766	0.628	1.58034e-52	Serpinh1	EndoV	Two-sided Wilcoxon test	0.25	25
7.17394e-17	0.382734	0.257	0.203	1.66945e-12	F2r	EndoV	Two-sided Wilcoxon test	0.25	25
4.82062e-118	0.382335	0.991	0.989	1.12181e-113	Hspa8	EndoV	Two-sided Wilcoxon test	0.25	25
6.39762e-70	0.376853	0.91	0.893	1.48879e-65	Fabp5	EndoV	Two-sided Wilcoxon test	0.25	25
1.99575e-53	0.376318	0.814	0.774	4.64432e-49	Calm2	EndoV	Two-sided Wilcoxon test	0.25	25
6.38565e-22	0.376028	0.558	0.546	1.486e-17	Krtcap2	EndoV	Two-sided Wilcoxon test	0.25	25
1.00384e-113	0.372383	1	1	2.33604e-109	Gm42418	EndoV	Two-sided Wilcoxon test	0.25	25
1.53105e-30	0.371171	0.43	0.33	3.5629e-26	Anxa2	EndoV	Two-sided Wilcoxon test	0.25	25
1.86728e-53	0.368649	0.842	0.81	4.34535e-49	Hsp90b1	EndoV	Two-sided Wilcoxon test	0.25	25
6.93865e-28	0.368186	0.597	0.556	1.61469e-23	Ier2	EndoV	Two-sided Wilcoxon test	0.25	25
1.20403e-35	0.368025	0.685	0.665	2.8019e-31	Clta	EndoV	Two-sided Wilcoxon test	0.25	25
4.09434e-37	0.365801	0.7	0.682	9.52794e-33	Sec61b	EndoV	Two-sided Wilcoxon test	0.25	25
1.93693e-10	0.363569	0.303	0.275	4.50742e-06	Arpc1b	EndoV	Two-sided Wilcoxon test	0.25	25
2.70717e-17	0.363382	0.409	0.362	6.29985e-13	Ddah2	EndoV	Two-sided Wilcoxon test	0.25	25
1.27357e-27	0.361844	0.628	0.618	2.96372e-23	Erh	EndoV	Two-sided Wilcoxon test	0.25	25
1.52207e-18	0.361192	0.411	0.352	3.54202e-14	Col18a1	EndoV	Two-sided Wilcoxon test	0.25	25
1.70039e-26	0.359679	0.628	0.622	3.95697e-22	Gnb2	EndoV	Two-sided Wilcoxon test	0.25	25
1.38549e-21	0.358753	0.436	0.374	3.22418e-17	Anxa5	EndoV	Two-sided Wilcoxon test	0.25	25
2.75266e-15	0.358016	0.451	0.418	6.40572e-11	Pclaf	EndoV	Two-sided Wilcoxon test	0.25	25
1.45069e-27	0.357122	0.607	0.571	3.37591e-23	Tpm3	EndoV	Two-sided Wilcoxon test	0.25	25
2.19686e-19	0.353744	0.421	0.364	5.11231e-15	Tle5	EndoV	Two-sided Wilcoxon test	0.25	25
2.11669e-39	0.353387	0.709	0.694	4.92576e-35	Pcbp1	EndoV	Two-sided Wilcoxon test	0.25	25
2.09746e-66	0.351584	0.886	0.848	4.88101e-62	Mdk	EndoV	Two-sided Wilcoxon test	0.25	25
8.03913e-22	0.350539	0.284	0.212	1.87079e-17	Col4a2	EndoV	Two-sided Wilcoxon test	0.25	25
7.22614e-40	0.349196	0.618	0.497	1.68159e-35	Id3	EndoV	Two-sided Wilcoxon test	0.25	25
5.23045e-138	0.347178	1	0.999	1.21718e-133	Hsp90ab1	EndoV	Two-sided Wilcoxon test	0.25	25
6.72084e-51	0.342753	0.845	0.826	1.56401e-46	Psma7	EndoV	Two-sided Wilcoxon test	0.25	25
7.73521e-34	0.342582	0.741	0.71	1.80006e-29	Hist1h2ae	EndoV	Two-sided Wilcoxon test	0.25	25
1.13898e-104	0.341085	0.993	0.989	2.65053e-100	Tubb5	EndoV	Two-sided Wilcoxon test	0.25	25
5.86641e-27	0.339751	0.701	0.687	1.36517e-22	Arpc2	EndoV	Two-sided Wilcoxon test	0.25	25
3.59787e-21	0.337118	0.575	0.582	8.37261e-17	Srp9	EndoV	Two-sided Wilcoxon test	0.25	25
4.16995e-49	0.336459	0.85	0.835	9.70389e-45	Sub1	EndoV	Two-sided Wilcoxon test	0.25	25
2.21584e-83	0.336452	0.958	0.935	5.15649e-79	Rpl35	EndoV	Two-sided Wilcoxon test	0.25	25
5.46488e-22	0.336121	0.367	0.29	1.27173e-17	Cgnl1	EndoV	Two-sided Wilcoxon test	0.25	25
3.43243e-11	0.333487	0.262	0.223	7.98761e-07	Limd2	EndoV	Two-sided Wilcoxon test	0.25	25
4.17658e-75	0.331531	0.999	0.997	9.71931e-71	AY036118	EndoV	Two-sided Wilcoxon test	0.25	25
3.8692e-23	0.330161	0.522	0.45	9.00401e-19	Fn1	EndoV	Two-sided Wilcoxon test	0.25	25
2.95659e-09	0.328034	0.434	0.44	6.88028e-05	Sept11	EndoV	Two-sided Wilcoxon test	0.25	25
8.49358e-82	0.327316	0.981	0.962	1.97654e-77	Rpl10	EndoV	Two-sided Wilcoxon test	0.25	25
1.02316e-81	0.326408	0.963	0.95	2.38099e-77	Eif4a1	EndoV	Two-sided Wilcoxon test	0.25	25
1.14178e-35	0.32628	0.784	0.762	2.65704e-31	Pdia3	EndoV	Two-sided Wilcoxon test	0.25	25
4.1466e-32	0.325172	0.733	0.714	9.64955e-28	Ppib	EndoV	Two-sided Wilcoxon test	0.25	25
3.51166e-27	0.322985	0.671	0.667	8.17199e-23	Psma4	EndoV	Two-sided Wilcoxon test	0.25	25
1.80323e-21	0.321314	0.598	0.582	4.1963e-17	Ywhab	EndoV	Two-sided Wilcoxon test	0.25	25
1.22757e-07	0.3209	0.311	0.296	0.00285667	Gipc1	EndoV	Two-sided Wilcoxon test	0.25	25
1.13338e-33	0.320692	0.752	0.722	2.63749e-29	Pdia6	EndoV	Two-sided Wilcoxon test	0.25	25
0.00861517	0.320552	0.256	0.267	1	Abhd17a	EndoV	Two-sided Wilcoxon test	0.25	25
3.41819e-05	0.315816	0.338	0.346	0.795446	Atp1b3	EndoV	Two-sided Wilcoxon test	0.25	25
2.21134e-23	0.315753	0.664	0.67	5.146e-19	Ppp1ca	EndoV	Two-sided Wilcoxon test	0.25	25
3.03654e-06	0.315026	0.332	0.323	0.0706632	Rpgrip1	EndoV	Two-sided Wilcoxon test	0.25	25
6.50768e-19	0.308239	0.494	0.438	1.5144e-14	Cd63	EndoV	Two-sided Wilcoxon test	0.25	25
1.93994e-83	0.308232	0.987	0.98	4.51444e-79	Eef1b2	EndoV	Two-sided Wilcoxon test	0.25	25
1.02523e-11	0.303294	0.483	0.475	2.38582e-07	Npc2	EndoV	Two-sided Wilcoxon test	0.25	25
1.8033e-13	0.301614	0.462	0.424	4.19645e-09	Tpm4	EndoV	Two-sided Wilcoxon test	0.25	25
7.96877e-60	0.299113	0.962	0.948	1.85441e-55	Ran	EndoV	Two-sided Wilcoxon test	0.25	25
2.00123e-19	0.298804	0.619	0.597	4.65707e-15	Arf4	EndoV	Two-sided Wilcoxon test	0.25	25
4.01499e-50	0.297948	0.91	0.89	9.34328e-46	Serf2	EndoV	Two-sided Wilcoxon test	0.25	25
5.94345e-35	0.297805	0.792	0.781	1.3831e-30	Atp5g2	EndoV	Two-sided Wilcoxon test	0.25	25
3.73721e-99	0.297401	0.995	0.993	8.69685e-95	Rpl9	EndoV	Two-sided Wilcoxon test	0.25	25
4.69769e-26	0.297259	0.689	0.692	1.0932e-21	Gpx4	EndoV	Two-sided Wilcoxon test	0.25	25
4.8139e-79	0.297115	0.986	0.985	1.12024e-74	Ybx1	EndoV	Two-sided Wilcoxon test	0.25	25
2.85989e-35	0.295763	0.807	0.808	6.65525e-31	Nme1	EndoV	Two-sided Wilcoxon test	0.25	25
2.46487e-14	0.293905	0.564	0.573	5.736e-10	Sh3glb1	EndoV	Two-sided Wilcoxon test	0.25	25
6.28945e-10	0.291981	0.52	0.547	1.46362e-05	Dad1	EndoV	Two-sided Wilcoxon test	0.25	25
8.46738e-37	0.291806	0.78	0.731	1.97044e-32	Tuba1a	EndoV	Two-sided Wilcoxon test	0.25	25
3.58418e-17	0.290328	0.434	0.372	8.34074e-13	Rhoc	EndoV	Two-sided Wilcoxon test	0.25	25
3.5442e-24	0.288632	0.727	0.746	8.2477e-20	Psmb1	EndoV	Two-sided Wilcoxon test	0.25	25
1.21025e-85	0.287938	0.99	0.986	2.81636e-81	Rps6	EndoV	Two-sided Wilcoxon test	0.25	25
1.02302e-14	0.287923	0.567	0.581	2.38068e-10	Gdi2	EndoV	Two-sided Wilcoxon test	0.25	25
1.35591e-64	0.287904	0.976	0.958	3.15534e-60	Btf3	EndoV	Two-sided Wilcoxon test	0.25	25
6.2199e-24	0.287573	0.696	0.673	1.44743e-19	Calr	EndoV	Two-sided Wilcoxon test	0.25	25
9.73492e-18	0.287044	0.408	0.343	2.26541e-13	Atf3	EndoV	Two-sided Wilcoxon test	0.25	25
9.66271e-53	0.287013	0.968	0.971	2.24861e-48	Cmss1	EndoV	Two-sided Wilcoxon test	0.25	25
0.00726409	0.285081	0.326	0.352	1	Utp11	EndoV	Two-sided Wilcoxon test	0.25	25
1.18262e-12	0.284734	0.464	0.426	2.75208e-08	Hist1h2ap	EndoV	Two-sided Wilcoxon test	0.25	25
1.88824e-27	0.28237	0.771	0.78	4.39412e-23	Hnrnpa1	EndoV	Two-sided Wilcoxon test	0.25	25
2.3335e-41	0.282238	0.884	0.885	5.43029e-37	Eef1g	EndoV	Two-sided Wilcoxon test	0.25	25
2.79506e-125	0.280837	1	1	6.50438e-121	Ptma	EndoV	Two-sided Wilcoxon test	0.25	25
4.56232e-06	0.279066	0.388	0.382	0.10617	Klf6	EndoV	Two-sided Wilcoxon test	0.25	25
0.00196514	0.276312	0.362	0.395	1	Vamp8	EndoV	Two-sided Wilcoxon test	0.25	25
9.23588e-24	0.276207	0.754	0.777	2.14928e-19	Cnbp	EndoV	Two-sided Wilcoxon test	0.25	25
1.34789e-25	0.275983	0.732	0.743	3.13667e-21	Psmb6	EndoV	Two-sided Wilcoxon test	0.25	25
1.00081e-14	0.275728	0.61	0.626	2.32898e-10	Manf	EndoV	Two-sided Wilcoxon test	0.25	25
0.00976561	0.275117	0.362	0.388	1	Cdk1	EndoV	Two-sided Wilcoxon test	0.25	25
1.00223e-46	0.274761	0.911	0.905	2.3323e-42	Ranbp1	EndoV	Two-sided Wilcoxon test	0.25	25
1.15194e-64	0.272874	0.979	0.965	2.68068e-60	H3f3b	EndoV	Two-sided Wilcoxon test	0.25	25
7.57145e-38	0.272609	0.806	0.793	1.76195e-33	Stmn1	EndoV	Two-sided Wilcoxon test	0.25	25
1.49165e-06	0.27253	0.467	0.503	0.0347121	Eif3l	EndoV	Two-sided Wilcoxon test	0.25	25
0.00205639	0.271654	0.378	0.412	1	Hdac1	EndoV	Two-sided Wilcoxon test	0.25	25
5.83198e-05	0.270592	0.431	0.452	1	G3bp2	EndoV	Two-sided Wilcoxon test	0.25	25
3.19203e-78	0.270075	0.996	0.993	7.42817e-74	Npm1	EndoV	Two-sided Wilcoxon test	0.25	25
0.000108485	0.269874	0.45	0.496	1	Raly	EndoV	Two-sided Wilcoxon test	0.25	25
8.70481e-23	0.269706	0.715	0.725	2.0257e-18	Txn1	EndoV	Two-sided Wilcoxon test	0.25	25
1.53215e-111	0.269477	1	1	3.56547e-107	Tpt1	EndoV	Two-sided Wilcoxon test	0.25	25
5.49199e-28	0.268704	0.791	0.794	1.27804e-23	Dnaja1	EndoV	Two-sided Wilcoxon test	0.25	25
2.43275e-23	0.268386	0.744	0.755	5.66125e-19	Cdc42	EndoV	Two-sided Wilcoxon test	0.25	25
3.4734e-05	0.267716	0.452	0.48	0.808295	Itm2b	EndoV	Two-sided Wilcoxon test	0.25	25
0.00012236	0.266993	0.412	0.444	1	Coa3	EndoV	Two-sided Wilcoxon test	0.25	25
2.10041e-22	0.266907	0.737	0.748	4.88787e-18	Prmt1	EndoV	Two-sided Wilcoxon test	0.25	25
0.00236152	0.266025	0.4	0.445	1	Ap2s1	EndoV	Two-sided Wilcoxon test	0.25	25
6.82594e-12	0.265868	0.544	0.571	1.58847e-07	Phf5a	EndoV	Two-sided Wilcoxon test	0.25	25
4.60095e-07	0.26582	0.493	0.536	0.0107069	Csnk2b	EndoV	Two-sided Wilcoxon test	0.25	25
8.71241e-12	0.263955	0.499	0.468	2.02747e-07	H2afy	EndoV	Two-sided Wilcoxon test	0.25	25
6.3257e-11	0.263007	0.525	0.557	1.47205e-06	Snx3	EndoV	Two-sided Wilcoxon test	0.25	25
0.00138326	0.262936	0.414	0.45	1	Brk1	EndoV	Two-sided Wilcoxon test	0.25	25
1.97378e-70	0.262794	0.988	0.988	4.59319e-66	H2afz	EndoV	Two-sided Wilcoxon test	0.25	25
1.41297e-10	0.262263	0.594	0.62	3.28812e-06	Mrfap1	EndoV	Two-sided Wilcoxon test	0.25	25
0.00535118	0.261331	0.378	0.409	1	Sms	EndoV	Two-sided Wilcoxon test	0.25	25
1.26108e-87	0.260605	0.998	0.997	2.93466e-83	Rpl3	EndoV	Two-sided Wilcoxon test	0.25	25
4.27664e-07	0.260238	0.518	0.547	0.00995217	Rnf7	EndoV	Two-sided Wilcoxon test	0.25	25
4.40708e-21	0.26	0.515	0.436	1.02557e-16	Id1	EndoV	Two-sided Wilcoxon test	0.25	25
8.08349e-30	0.259805	0.837	0.838	1.88111e-25	Ppp1r14b	EndoV	Two-sided Wilcoxon test	0.25	25
4.7246e-34	0.258715	0.856	0.847	1.09946e-29	Rbm3	EndoV	Two-sided Wilcoxon test	0.25	25
2.68933e-66	0.257702	0.989	0.985	6.25834e-62	Naca	EndoV	Two-sided Wilcoxon test	0.25	25
1.21148e-05	0.255353	0.492	0.534	0.281923	Magoh	EndoV	Two-sided Wilcoxon test	0.25	25
4.30041e-09	0.254845	0.568	0.593	0.000100075	Anp32a	EndoV	Two-sided Wilcoxon test	0.25	25
1.23056e-24	0.25456	0.759	0.76	2.86363e-20	Snrpd1	EndoV	Two-sided Wilcoxon test	0.25	25
5.22676e-09	0.254168	0.519	0.55	0.000121632	Etfb	EndoV	Two-sided Wilcoxon test	0.25	25
8.75336e-06	0.252728	0.483	0.527	0.2037	Selenof	EndoV	Two-sided Wilcoxon test	0.25	25
5.66652e-13	0.252409	0.622	0.659	1.31866e-08	Eif3e	EndoV	Two-sided Wilcoxon test	0.25	25
2.0901e-78	0.250738	0.998	0.997	4.86388e-74	Rps9	EndoV	Two-sided Wilcoxon test	0.25	25
0	1.4588	0.68	0.259	0	Pdlim3	AVCm	Two-sided Wilcoxon test	0.25	25
0	1.32228	0.729	0.356	0	Hapln1	AVCm	Two-sided Wilcoxon test	0.25	25
6.8249e-282	1.20917	0.798	0.571	1.58822e-277	Tagln2	AVCm	Two-sided Wilcoxon test	0.25	25
1.28054e-269	1.15112	0.491	0.194	2.97994e-265	Twist1	AVCm	Two-sided Wilcoxon test	0.25	25
1.86426e-298	1.12413	0.535	0.21	4.33832e-294	Ncam1	AVCm	Two-sided Wilcoxon test	0.25	25
8.59752e-208	1.11848	0.685	0.425	2.00073e-203	Apoe	AVCm	Two-sided Wilcoxon test	0.25	25
2.08759e-250	1.05463	0.819	0.654	4.85803e-246	Lgals1	AVCm	Two-sided Wilcoxon test	0.25	25
0	1.03121	0.99	0.972	0	Tmsb4x	AVCm	Two-sided Wilcoxon test	0.25	25
1.6786e-230	0.893168	0.716	0.413	3.90628e-226	Vcan	AVCm	Two-sided Wilcoxon test	0.25	25
7.49748e-155	0.877919	0.705	0.49	1.74474e-150	Klf2	AVCm	Two-sided Wilcoxon test	0.25	25
6.5822e-175	0.826766	0.31	0.107	1.53174e-170	Cthrc1	AVCm	Two-sided Wilcoxon test	0.25	25
1.13152e-223	0.780223	0.291	0.08	2.63316e-219	Igfbp7	AVCm	Two-sided Wilcoxon test	0.25	25
1.73381e-254	0.778665	0.962	0.873	4.03474e-250	Vim	AVCm	Two-sided Wilcoxon test	0.25	25
1.3401e-123	0.752469	0.412	0.207	3.11855e-119	Tbx20	AVCm	Two-sided Wilcoxon test	0.25	25
4.07416e-112	0.75214	0.448	0.254	9.48099e-108	Dpysl3	AVCm	Two-sided Wilcoxon test	0.25	25
1.72712e-91	0.71054	0.528	0.365	4.01917e-87	Rhoc	AVCm	Two-sided Wilcoxon test	0.25	25
1.58531e-110	0.705853	0.508	0.305	3.68919e-106	Dlc1	AVCm	Two-sided Wilcoxon test	0.25	25
1.87297e-111	0.688518	0.335	0.157	4.35859e-107	Igf1	AVCm	Two-sided Wilcoxon test	0.25	25
4.30061e-132	0.669936	0.829	0.728	1.00079e-127	Tuba1a	AVCm	Two-sided Wilcoxon test	0.25	25
4.36986e-99	0.657218	0.373	0.191	1.01691e-94	Sox6	AVCm	Two-sided Wilcoxon test	0.25	25
7.40081e-185	0.652549	0.966	0.926	1.72224e-180	Tmsb10	AVCm	Two-sided Wilcoxon test	0.25	25
4.29391e-264	0.617562	0.999	0.999	9.99235e-260	Actb	AVCm	Two-sided Wilcoxon test	0.25	25
3.33498e-81	0.614226	0.278	0.135	7.76082e-77	Sox9	AVCm	Two-sided Wilcoxon test	0.25	25
2.1036e-74	0.611829	0.57	0.433	4.8953e-70	Cd63	AVCm	Two-sided Wilcoxon test	0.25	25
2.70679e-108	0.607823	0.754	0.589	6.29897e-104	Sparc	AVCm	Two-sided Wilcoxon test	0.25	25
5.88165e-79	0.589135	0.374	0.211	1.36872e-74	Sox5	AVCm	Two-sided Wilcoxon test	0.25	25
1.8218e-59	0.58092	0.685	0.644	4.23951e-55	Dbi	AVCm	Two-sided Wilcoxon test	0.25	25
4.45714e-90	0.564759	0.533	0.336	1.03722e-85	Ramp2	AVCm	Two-sided Wilcoxon test	0.25	25
5.15257e-57	0.562052	0.56	0.433	1.19905e-52	Id1	AVCm	Two-sided Wilcoxon test	0.25	25
8.22123e-53	0.555758	0.485	0.371	1.91316e-48	Anxa5	AVCm	Two-sided Wilcoxon test	0.25	25
2.87527e-25	0.554246	0.353	0.298	6.69104e-21	Lmo4	AVCm	Two-sided Wilcoxon test	0.25	25
9.66387e-72	0.552865	0.646	0.496	2.24888e-67	Id3	AVCm	Two-sided Wilcoxon test	0.25	25
5.1283e-173	0.530485	0.991	0.975	1.19341e-168	Actg1	AVCm	Two-sided Wilcoxon test	0.25	25
5.25314e-35	0.523249	0.409	0.323	1.22246e-30	Rcn3	AVCm	Two-sided Wilcoxon test	0.25	25
1.46035e-103	0.520715	0.859	0.755	3.39838e-99	Gm10076	AVCm	Two-sided Wilcoxon test	0.25	25
1.48704e-39	0.516911	0.446	0.341	3.4605e-35	Atf3	AVCm	Two-sided Wilcoxon test	0.25	25
6.52438e-152	0.500415	0.99	0.973	1.51829e-147	Ubb	AVCm	Two-sided Wilcoxon test	0.25	25
1.66535e-54	0.499507	0.509	0.377	3.87543e-50	S100a10	AVCm	Two-sided Wilcoxon test	0.25	25
2.61384e-35	0.497537	0.398	0.301	6.08267e-31	Sox4	AVCm	Two-sided Wilcoxon test	0.25	25
6.85878e-51	0.494739	0.619	0.503	1.59611e-46	Id2	AVCm	Two-sided Wilcoxon test	0.25	25
1.40333e-64	0.491596	0.412	0.255	3.26569e-60	Creb5	AVCm	Two-sided Wilcoxon test	0.25	25
4.06369e-40	0.479788	0.443	0.33	9.45661e-36	Anxa2	AVCm	Two-sided Wilcoxon test	0.25	25
4.63933e-26	0.470884	0.272	0.194	1.07962e-21	Klf4	AVCm	Two-sided Wilcoxon test	0.25	25
1.2572e-37	0.47007	0.394	0.288	2.92562e-33	Ccnd1	AVCm	Two-sided Wilcoxon test	0.25	25
1.75423e-29	0.456057	0.408	0.331	4.08227e-25	Rhob	AVCm	Two-sided Wilcoxon test	0.25	25
3.05485e-43	0.447056	0.677	0.657	7.10895e-39	Myl12a	AVCm	Two-sided Wilcoxon test	0.25	25
1.82535e-36	0.444953	0.28	0.179	4.24778e-32	Edil3	AVCm	Two-sided Wilcoxon test	0.25	25
1.04955e-78	0.430944	0.842	0.791	2.44241e-74	Jund	AVCm	Two-sided Wilcoxon test	0.25	25
6.30454e-74	0.428912	0.915	0.893	1.46713e-69	Fabp5	AVCm	Two-sided Wilcoxon test	0.25	25
7.43651e-52	0.427677	0.444	0.298	1.73055e-47	Nfia	AVCm	Two-sided Wilcoxon test	0.25	25
5.6679e-18	0.422674	0.489	0.477	1.31898e-13	Itm2b	AVCm	Two-sided Wilcoxon test	0.25	25
8.32684e-21	0.41081	0.535	0.517	1.93774e-16	Mtch1	AVCm	Two-sided Wilcoxon test	0.25	25
9.39497e-31	0.408535	0.474	0.381	2.1863e-26	Map1b	AVCm	Two-sided Wilcoxon test	0.25	25
9.32785e-39	0.403868	0.692	0.667	2.17068e-34	Clic1	AVCm	Two-sided Wilcoxon test	0.25	25
1.78367e-79	0.399336	0.91	0.87	4.15078e-75	Nme2	AVCm	Two-sided Wilcoxon test	0.25	25
3.47683e-104	0.397683	0.977	0.965	8.09093e-100	H3f3b	AVCm	Two-sided Wilcoxon test	0.25	25
1.94928e-42	0.391624	0.303	0.185	4.53616e-38	Limch1	AVCm	Two-sided Wilcoxon test	0.25	25
4.61697e-17	0.388691	0.423	0.38	1.07442e-12	Klf6	AVCm	Two-sided Wilcoxon test	0.25	25
8.73057e-51	0.38747	0.819	0.762	2.03169e-46	Igf2	AVCm	Two-sided Wilcoxon test	0.25	25
2.79145e-38	0.384576	0.728	0.715	6.49599e-34	Ppib	AVCm	Two-sided Wilcoxon test	0.25	25
6.1046e-30	0.382115	0.314	0.221	1.4206e-25	Lhfp	AVCm	Two-sided Wilcoxon test	0.25	25
6.63298e-22	0.381256	0.49	0.425	1.54356e-17	Hist1h2ap	AVCm	Two-sided Wilcoxon test	0.25	25
1.31023e-18	0.378609	0.357	0.297	3.04904e-14	C430049B03Rik	AVCm	Two-sided Wilcoxon test	0.25	25
8.17204e-32	0.378107	0.602	0.532	1.90172e-27	Cd81	AVCm	Two-sided Wilcoxon test	0.25	25
1.35017e-17	0.37619	0.542	0.543	3.14197e-13	Kdelr2	AVCm	Two-sided Wilcoxon test	0.25	25
2.35348e-49	0.372907	0.768	0.708	5.47678e-45	Hist1h2ae	AVCm	Two-sided Wilcoxon test	0.25	25
5.7436e-12	0.36759	0.277	0.238	1.33659e-07	Zyx	AVCm	Two-sided Wilcoxon test	0.25	25
6.96487e-29	0.358845	0.361	0.266	1.62079e-24	Ltbp1	AVCm	Two-sided Wilcoxon test	0.25	25
1.64996e-25	0.354255	0.505	0.442	3.83962e-21	Ctsl	AVCm	Two-sided Wilcoxon test	0.25	25
2.15786e-27	0.353982	0.63	0.618	5.02155e-23	Erh	AVCm	Two-sided Wilcoxon test	0.25	25
1.79203e-26	0.350629	0.324	0.233	4.17022e-22	Col3a1	AVCm	Two-sided Wilcoxon test	0.25	25
1.11529e-17	0.35021	0.482	0.439	2.5954e-13	Maged1	AVCm	Two-sided Wilcoxon test	0.25	25
7.90138e-45	0.347816	0.262	0.15	1.83873e-40	Robo2	AVCm	Two-sided Wilcoxon test	0.25	25
5.55612e-75	0.346923	0.954	0.936	1.29296e-70	Rpl35	AVCm	Two-sided Wilcoxon test	0.25	25
9.78195e-22	0.344489	0.441	0.375	2.27636e-17	S100a11	AVCm	Two-sided Wilcoxon test	0.25	25
9.683e-26	0.343408	0.672	0.674	2.25333e-21	Ubc	AVCm	Two-sided Wilcoxon test	0.25	25
9.93756e-05	0.342968	0.322	0.327	1	Pdlim1	AVCm	Two-sided Wilcoxon test	0.25	25
8.12401e-14	0.335951	0.395	0.35	1.89054e-09	Fstl1	AVCm	Two-sided Wilcoxon test	0.25	25
1.55938e-93	0.335797	1	1	3.62883e-89	Gm42418	AVCm	Two-sided Wilcoxon test	0.25	25
1.92072e-12	0.335265	0.528	0.528	4.4697e-08	Eid1	AVCm	Two-sided Wilcoxon test	0.25	25
8.42884e-40	0.33413	0.734	0.631	1.96147e-35	Serpinh1	AVCm	Two-sided Wilcoxon test	0.25	25
1.09813e-10	0.332223	0.399	0.38	2.55545e-06	Cd24a	AVCm	Two-sided Wilcoxon test	0.25	25
1.21475e-09	0.327323	0.253	0.217	2.82685e-05	Mfap2	AVCm	Two-sided Wilcoxon test	0.25	25
0.000983121	0.326471	0.31	0.326	1	Plin3	AVCm	Two-sided Wilcoxon test	0.25	25
8.43349e-12	0.32634	0.434	0.417	1.96256e-07	Sh3bgrl3	AVCm	Two-sided Wilcoxon test	0.25	25
6.79094e-09	0.324345	0.261	0.227	0.000158032	Creb3l2	AVCm	Two-sided Wilcoxon test	0.25	25
1.71384e-56	0.323887	0.888	0.878	3.98828e-52	Dynll1	AVCm	Two-sided Wilcoxon test	0.25	25
2.20456e-06	0.323881	0.253	0.231	0.0513023	Tspan6	AVCm	Two-sided Wilcoxon test	0.25	25
6.11762e-14	0.32319	0.337	0.285	1.42363e-09	Gata6	AVCm	Two-sided Wilcoxon test	0.25	25
3.90851e-10	0.323051	0.308	0.272	9.0955e-06	Ckap4	AVCm	Two-sided Wilcoxon test	0.25	25
4.2481e-10	0.323012	0.35	0.322	9.88576e-06	Dpysl2	AVCm	Two-sided Wilcoxon test	0.25	25
4.8188e-09	0.322662	0.331	0.303	0.000112138	Ptms	AVCm	Two-sided Wilcoxon test	0.25	25
1.23036e-09	0.318846	0.53	0.569	2.86317e-05	Psmd8	AVCm	Two-sided Wilcoxon test	0.25	25
6.23029e-75	0.316647	0.971	0.963	1.44985e-70	Rpl10	AVCm	Two-sided Wilcoxon test	0.25	25
2.76806e-10	0.315139	0.309	0.274	6.44156e-06	Ppic	AVCm	Two-sided Wilcoxon test	0.25	25
5.82778e-05	0.31485	0.251	0.24	1	Txndc5	AVCm	Two-sided Wilcoxon test	0.25	25
2.35292e-18	0.313404	0.613	0.598	5.47547e-14	Arf4	AVCm	Two-sided Wilcoxon test	0.25	25
2.36357e-05	0.310571	0.316	0.305	0.550027	H1f0	AVCm	Two-sided Wilcoxon test	0.25	25
1.99927e-15	0.310273	0.571	0.593	4.6525e-11	Vdac3	AVCm	Two-sided Wilcoxon test	0.25	25
2.14564e-08	0.307627	0.274	0.243	0.000499312	Ppfibp1	AVCm	Two-sided Wilcoxon test	0.25	25
4.96341e-62	0.306743	0.968	0.971	1.15504e-57	Cmss1	AVCm	Two-sided Wilcoxon test	0.25	25
6.72732e-05	0.304998	0.283	0.276	1	Arpc1b	AVCm	Two-sided Wilcoxon test	0.25	25
1.07292e-05	0.304739	0.449	0.474	0.249679	Tbrg1	AVCm	Two-sided Wilcoxon test	0.25	25
3.82968e-12	0.302177	0.496	0.468	8.91204e-08	H2afy	AVCm	Two-sided Wilcoxon test	0.25	25
7.45524e-07	0.301322	0.299	0.279	0.0173491	Tubb2b	AVCm	Two-sided Wilcoxon test	0.25	25
1.48979e-55	0.298781	0.877	0.849	3.46689e-51	Mdk	AVCm	Two-sided Wilcoxon test	0.25	25
8.04665e-79	0.298081	0.992	0.989	1.87253e-74	Hspa8	AVCm	Two-sided Wilcoxon test	0.25	25
1.0295e-79	0.296341	0.989	0.989	2.39576e-75	Tubb5	AVCm	Two-sided Wilcoxon test	0.25	25
4.92657e-12	0.294405	0.588	0.62	1.14646e-07	Mrfap1	AVCm	Two-sided Wilcoxon test	0.25	25
0.000711271	0.293176	0.376	0.406	1	Rcn1	AVCm	Two-sided Wilcoxon test	0.25	25
8.96494e-81	0.292519	0.995	0.996	2.08623e-76	Ppia	AVCm	Two-sided Wilcoxon test	0.25	25
3.59677e-38	0.292282	0.694	0.619	8.37005e-34	Tnni1	AVCm	Two-sided Wilcoxon test	0.25	25
8.2631e-20	0.291492	0.68	0.689	1.9229e-15	Arpc2	AVCm	Two-sided Wilcoxon test	0.25	25
0.000218148	0.290889	0.331	0.34	1	Selenos	AVCm	Two-sided Wilcoxon test	0.25	25
4.95946e-13	0.289327	0.446	0.397	1.15412e-08	Ifitm2	AVCm	Two-sided Wilcoxon test	0.25	25
5.22723e-46	0.287289	0.9	0.886	1.21643e-41	Pfn1	AVCm	Two-sided Wilcoxon test	0.25	25
1.30259e-07	0.287138	0.445	0.452	0.00303125	Atxn10	AVCm	Two-sided Wilcoxon test	0.25	25
2.3939e-26	0.282765	0.791	0.804	5.57084e-22	Cfl1	AVCm	Two-sided Wilcoxon test	0.25	25
3.13911e-41	0.282218	0.91	0.903	7.30502e-37	Calm1	AVCm	Two-sided Wilcoxon test	0.25	25
0.000577285	0.280539	0.356	0.373	1	Prdx4	AVCm	Two-sided Wilcoxon test	0.25	25
9.112e-08	0.280092	0.4	0.392	0.00212045	Crip1	AVCm	Two-sided Wilcoxon test	0.25	25
3.51562e-15	0.279394	0.261	0.2	8.1812e-11	Hecw2	AVCm	Two-sided Wilcoxon test	0.25	25
3.88206e-11	0.278091	0.559	0.567	9.03395e-07	Selenoh	AVCm	Two-sided Wilcoxon test	0.25	25
2.03015e-66	0.277536	0.986	0.977	4.72436e-62	Eif1	AVCm	Two-sided Wilcoxon test	0.25	25
3.83903e-06	0.275464	0.276	0.255	0.089338	Cotl1	AVCm	Two-sided Wilcoxon test	0.25	25
1.15868e-16	0.274563	0.323	0.253	2.69636e-12	Gata4	AVCm	Two-sided Wilcoxon test	0.25	25
3.801e-20	0.270749	0.667	0.657	8.84531e-16	Fkbp1a	AVCm	Two-sided Wilcoxon test	0.25	25
3.83555e-05	0.270204	0.452	0.478	0.892571	Npc2	AVCm	Two-sided Wilcoxon test	0.25	25
1.68588e-11	0.270046	0.461	0.425	3.92322e-07	Tpm4	AVCm	Two-sided Wilcoxon test	0.25	25
7.25371e-09	0.267682	0.547	0.582	0.000168801	Gdi2	AVCm	Two-sided Wilcoxon test	0.25	25
2.52458e-15	0.267659	0.659	0.678	5.87494e-11	Cdk4	AVCm	Two-sided Wilcoxon test	0.25	25
2.83848e-45	0.266854	0.948	0.951	6.60543e-41	Eif4a1	AVCm	Two-sided Wilcoxon test	0.25	25
4.27079e-16	0.265492	0.669	0.675	9.93855e-12	Calr	AVCm	Two-sided Wilcoxon test	0.25	25
3.30653e-07	0.263968	0.53	0.589	0.00769462	1810058I24Rik	AVCm	Two-sided Wilcoxon test	0.25	25
9.12351e-12	0.263356	0.591	0.596	2.12313e-07	Gnai2	AVCm	Two-sided Wilcoxon test	0.25	25
1.28702e-13	0.262552	0.585	0.584	2.99503e-09	Hmgn2	AVCm	Two-sided Wilcoxon test	0.25	25
1.57722e-05	0.260514	0.374	0.365	0.367034	Ddah2	AVCm	Two-sided Wilcoxon test	0.25	25
6.96212e-17	0.260372	0.552	0.485	1.62016e-12	Marcks	AVCm	Two-sided Wilcoxon test	0.25	25
3.05039e-05	0.257836	0.304	0.292	0.709857	Pcbp4	AVCm	Two-sided Wilcoxon test	0.25	25
9.76803e-20	0.257335	0.524	0.45	2.27312e-15	Fn1	AVCm	Two-sided Wilcoxon test	0.25	25
9.98546e-07	0.256561	0.507	0.546	0.0232372	Tmem167	AVCm	Two-sided Wilcoxon test	0.25	25
3.10736e-88	0.25648	1	1	7.23115e-84	Ptma	AVCm	Two-sided Wilcoxon test	0.25	25
1.67771e-91	0.254611	1	1	3.9042e-87	Tpt1	AVCm	Two-sided Wilcoxon test	0.25	25
2.32712e-06	0.253209	0.525	0.574	0.0541544	Ywhah	AVCm	Two-sided Wilcoxon test	0.25	25
1.05891e-13	0.252659	0.673	0.697	2.46419e-09	Sept7	AVCm	Two-sided Wilcoxon test	0.25	25
1.23127e-26	0.251765	0.78	0.78	2.8653e-22	Hnrnpa1	AVCm	Two-sided Wilcoxon test	0.25	25
0	1.47077	0.522	0.066	0	Upk3b	pEpiC1	Two-sided Wilcoxon test	0.25	25
0	1.31946	0.651	0.312	0	Itm2a	pEpiC1	Two-sided Wilcoxon test	0.25	25
0	1.25421	0.765	0.366	0	Ptn	pEpiC1	Two-sided Wilcoxon test	0.25	25
4.57198e-239	1.06682	0.659	0.366	1.06395e-234	S100a10	pEpiC1	Two-sided Wilcoxon test	0.25	25
1.58621e-243	1.02126	0.828	0.584	3.69126e-239	Sparc	pEpiC1	Two-sided Wilcoxon test	0.25	25
2.42457e-202	0.987022	0.508	0.236	5.64222e-198	Pmp22	pEpiC1	Two-sided Wilcoxon test	0.25	25
0	0.905915	0.318	0.057	0	Dcn	pEpiC1	Two-sided Wilcoxon test	0.25	25
0	0.887577	0.314	0.051	0	Upk1b	pEpiC1	Two-sided Wilcoxon test	0.25	25
1.38351e-240	0.812632	0.307	0.084	3.21957e-236	Stk26	pEpiC1	Two-sided Wilcoxon test	0.25	25
1.96983e-206	0.805801	0.314	0.098	4.58399e-202	Sdc4	pEpiC1	Two-sided Wilcoxon test	0.25	25
9.09968e-99	0.805379	0.497	0.341	2.11759e-94	Ezr	pEpiC1	Two-sided Wilcoxon test	0.25	25
0	0.804148	0.996	0.974	0	Actg1	pEpiC1	Two-sided Wilcoxon test	0.25	25
2.13208e-158	0.797579	0.435	0.198	4.96156e-154	Krt18	pEpiC1	Two-sided Wilcoxon test	0.25	25
4.07444e-211	0.791503	0.309	0.091	9.48163e-207	Itga4	pEpiC1	Two-sided Wilcoxon test	0.25	25
1.03846e-195	0.775903	0.858	0.651	2.4166e-191	Mest	pEpiC1	Two-sided Wilcoxon test	0.25	25
0	0.764004	0.301	0.057	0	Wt1	pEpiC1	Two-sided Wilcoxon test	0.25	25
1.8175e-103	0.739736	0.454	0.264	4.2295e-99	Akap12	pEpiC1	Two-sided Wilcoxon test	0.25	25
3.91489e-135	0.734941	0.789	0.675	9.11035e-131	Eno1	pEpiC1	Two-sided Wilcoxon test	0.25	25
2.35664e-160	0.733926	0.831	0.624	5.48413e-156	Serpinh1	pEpiC1	Two-sided Wilcoxon test	0.25	25
5.59429e-97	0.732148	0.537	0.368	1.30185e-92	S100a11	pEpiC1	Two-sided Wilcoxon test	0.25	25
1.33522e-202	0.718789	0.273	0.075	3.1072e-198	Aplp1	pEpiC1	Two-sided Wilcoxon test	0.25	25
6.08295e-107	0.695557	0.315	0.145	1.41556e-102	Gas1	pEpiC1	Two-sided Wilcoxon test	0.25	25
4.3285e-122	0.692766	0.373	0.172	1.00728e-117	Krt8	pEpiC1	Two-sided Wilcoxon test	0.25	25
1.97645e-77	0.691573	0.59	0.462	4.5994e-73	Ccnd2	pEpiC1	Two-sided Wilcoxon test	0.25	25
5.96464e-81	0.672807	0.554	0.405	1.38803e-76	Bex1	pEpiC1	Two-sided Wilcoxon test	0.25	25
0	0.65875	1	0.999	0	Actb	pEpiC1	Two-sided Wilcoxon test	0.25	25
1.83502e-91	0.651388	0.396	0.221	4.27028e-87	Colec12	pEpiC1	Two-sided Wilcoxon test	0.25	25
5.19288e-80	0.64933	0.273	0.13	1.20844e-75	Tubb3	pEpiC1	Two-sided Wilcoxon test	0.25	25
7.64551e-143	0.644891	0.889	0.807	1.77919e-138	Hsp90b1	pEpiC1	Two-sided Wilcoxon test	0.25	25
1.03574e-92	0.64143	0.761	0.668	2.41028e-88	Calr	pEpiC1	Two-sided Wilcoxon test	0.25	25
2.32162e-88	0.635739	0.281	0.131	5.40263e-84	Nrk	pEpiC1	Two-sided Wilcoxon test	0.25	25
3.87383e-116	0.635655	0.329	0.139	9.0148e-112	Thsd4	pEpiC1	Two-sided Wilcoxon test	0.25	25
1.47712e-70	0.629762	0.619	0.534	3.43742e-66	Aprt	pEpiC1	Two-sided Wilcoxon test	0.25	25
2.16152e-96	0.608649	0.678	0.494	5.03008e-92	Id3	pEpiC1	Two-sided Wilcoxon test	0.25	25
3.39956e-121	0.59849	0.26	0.097	7.91111e-117	Ly6e	pEpiC1	Two-sided Wilcoxon test	0.25	25
5.49688e-59	0.594595	0.422	0.287	1.27918e-54	Ccnd1	pEpiC1	Two-sided Wilcoxon test	0.25	25
3.02317e-129	0.593701	0.251	0.087	7.03523e-125	Gucy1a1	pEpiC1	Two-sided Wilcoxon test	0.25	25
6.06227e-178	0.587231	0.975	0.926	1.41075e-173	Tmsb10	pEpiC1	Two-sided Wilcoxon test	0.25	25
2.49432e-41	0.583195	0.382	0.291	5.80454e-37	Prxl2a	pEpiC1	Two-sided Wilcoxon test	0.25	25
7.16555e-64	0.575143	0.457	0.307	1.66749e-59	Basp1	pEpiC1	Two-sided Wilcoxon test	0.25	25
2.78521e-69	0.572877	0.488	0.327	6.48147e-65	Anxa2	pEpiC1	Two-sided Wilcoxon test	0.25	25
2.89467e-68	0.560705	0.666	0.579	6.73618e-64	Hmgn2	pEpiC1	Two-sided Wilcoxon test	0.25	25
1.77507e-95	0.551887	0.758	0.659	4.13078e-91	Lgals1	pEpiC1	Two-sided Wilcoxon test	0.25	25
3.14807e-100	0.546242	0.853	0.757	7.32588e-96	Pdia3	pEpiC1	Two-sided Wilcoxon test	0.25	25
7.86799e-80	0.543396	0.686	0.558	1.83096e-75	Peg3	pEpiC1	Two-sided Wilcoxon test	0.25	25
2.1351e-57	0.541478	0.294	0.167	4.96859e-53	Rnd3	pEpiC1	Two-sided Wilcoxon test	0.25	25
9.23054e-82	0.536798	0.676	0.5	2.14804e-77	Id2	pEpiC1	Two-sided Wilcoxon test	0.25	25
3.51859e-107	0.535522	0.879	0.758	8.18811e-103	Igf2	pEpiC1	Two-sided Wilcoxon test	0.25	25
1.48257e-64	0.533477	0.635	0.479	3.4501e-60	Marcks	pEpiC1	Two-sided Wilcoxon test	0.25	25
2.82565e-78	0.530428	0.587	0.411	6.57556e-74	Igfbp5	pEpiC1	Two-sided Wilcoxon test	0.25	25
4.93502e-54	0.529033	0.617	0.537	1.14843e-49	Kdelr2	pEpiC1	Two-sided Wilcoxon test	0.25	25
5.02958e-71	0.527761	0.282	0.14	1.17043e-66	Pcsk5	pEpiC1	Two-sided Wilcoxon test	0.25	25
9.21573e-180	0.525282	0.993	0.973	2.14459e-175	Ubb	pEpiC1	Two-sided Wilcoxon test	0.25	25
3.09751e-72	0.518504	0.639	0.509	7.20821e-68	Tagln	pEpiC1	Two-sided Wilcoxon test	0.25	25
2.23464e-95	0.509266	0.856	0.756	5.20023e-91	Gm10076	pEpiC1	Two-sided Wilcoxon test	0.25	25
3.40007e-43	0.508328	0.385	0.272	7.9123e-39	Bex2	pEpiC1	Two-sided Wilcoxon test	0.25	25
9.00301e-202	0.504192	0.995	0.993	2.09509e-197	Npm1	pEpiC1	Two-sided Wilcoxon test	0.25	25
1.4433e-87	0.499376	0.815	0.728	3.35871e-83	Pgam1	pEpiC1	Two-sided Wilcoxon test	0.25	25
3.20506e-35	0.499226	0.506	0.448	7.45849e-31	Phgdh	pEpiC1	Two-sided Wilcoxon test	0.25	25
1.10067e-110	0.489377	0.935	0.868	2.56138e-106	Nme2	pEpiC1	Two-sided Wilcoxon test	0.25	25
2.0488e-164	0.47935	0.957	0.873	4.76777e-160	Vim	pEpiC1	Two-sided Wilcoxon test	0.25	25
4.75495e-92	0.47843	0.88	0.831	1.10652e-87	Hmgn1	pEpiC1	Two-sided Wilcoxon test	0.25	25
1.32972e-30	0.475377	0.442	0.366	3.0944e-26	Csrp1	pEpiC1	Two-sided Wilcoxon test	0.25	25
2.54662e-77	0.473949	0.801	0.719	5.92624e-73	Pdia6	pEpiC1	Two-sided Wilcoxon test	0.25	25
7.58738e-36	0.469468	0.597	0.523	1.76566e-31	Fos	pEpiC1	Two-sided Wilcoxon test	0.25	25
1.68675e-60	0.467896	0.744	0.692	3.92524e-56	Sept7	pEpiC1	Two-sided Wilcoxon test	0.25	25
7.04576e-61	0.466903	0.588	0.446	1.63962e-56	Cald1	pEpiC1	Two-sided Wilcoxon test	0.25	25
2.01944e-58	0.464327	0.767	0.708	4.69944e-54	Hist1h2ae	pEpiC1	Two-sided Wilcoxon test	0.25	25
8.16904e-95	0.460747	0.855	0.789	1.90102e-90	H19	pEpiC1	Two-sided Wilcoxon test	0.25	25
1.7437e-46	0.460138	0.313	0.195	4.05775e-42	Vav3	pEpiC1	Two-sided Wilcoxon test	0.25	25
1.74514e-31	0.457323	0.328	0.24	4.06112e-27	Arhgap29	pEpiC1	Two-sided Wilcoxon test	0.25	25
1.90196e-40	0.454909	0.711	0.682	4.42605e-36	Hist1h1b	pEpiC1	Two-sided Wilcoxon test	0.25	25
2.05581e-54	0.452703	0.707	0.643	4.78407e-50	Dbi	pEpiC1	Two-sided Wilcoxon test	0.25	25
9.35578e-46	0.452644	0.555	0.433	2.17718e-41	Id1	pEpiC1	Two-sided Wilcoxon test	0.25	25
1.34246e-51	0.448264	0.709	0.655	3.12404e-47	Myl12a	pEpiC1	Two-sided Wilcoxon test	0.25	25
9.72741e-194	0.444245	0.965	0.896	2.26367e-189	Cdkn1c	pEpiC1	Two-sided Wilcoxon test	0.25	25
4.52639e-91	0.443279	0.926	0.872	1.05334e-86	Hspa5	pEpiC1	Two-sided Wilcoxon test	0.25	25
2.28803e-31	0.441193	0.464	0.377	5.32447e-27	Cnn3	pEpiC1	Two-sided Wilcoxon test	0.25	25
3.587e-47	0.434108	0.702	0.655	8.34731e-43	Fkbp1a	pEpiC1	Two-sided Wilcoxon test	0.25	25
3.09577e-90	0.432271	0.918	0.882	7.20418e-86	Hspd1	pEpiC1	Two-sided Wilcoxon test	0.25	25
2.36459e-35	0.428536	0.317	0.213	5.50264e-31	Ccn1	pEpiC1	Two-sided Wilcoxon test	0.25	25
5.74172e-43	0.427111	0.664	0.616	1.33616e-38	Erh	pEpiC1	Two-sided Wilcoxon test	0.25	25
5.05739e-39	0.425788	0.644	0.618	1.17691e-34	Rbbp7	pEpiC1	Two-sided Wilcoxon test	0.25	25
7.27195e-93	0.423086	0.918	0.893	1.69226e-88	Mif	pEpiC1	Two-sided Wilcoxon test	0.25	25
9.48302e-172	0.420659	0.991	0.972	2.20679e-167	Tmsb4x	pEpiC1	Two-sided Wilcoxon test	0.25	25
1.26322e-16	0.420079	0.277	0.224	2.93965e-12	Zcchc3	pEpiC1	Two-sided Wilcoxon test	0.25	25
5.18267e-20	0.417068	0.412	0.368	1.20606e-15	Ugp2	pEpiC1	Two-sided Wilcoxon test	0.25	25
1.89928e-35	0.416137	0.657	0.622	4.41982e-31	Manf	pEpiC1	Two-sided Wilcoxon test	0.25	25
3.14199e-106	0.411031	0.963	0.935	7.31173e-102	Rpl35	pEpiC1	Two-sided Wilcoxon test	0.25	25
6.69185e-37	0.408833	0.672	0.641	1.55726e-32	Vdac1	pEpiC1	Two-sided Wilcoxon test	0.25	25
5.3218e-130	0.393158	0.997	0.989	1.23844e-125	Hspa8	pEpiC1	Two-sided Wilcoxon test	0.25	25
5.88145e-49	0.388985	0.58	0.431	1.36867e-44	Hmga2	pEpiC1	Two-sided Wilcoxon test	0.25	25
4.04057e-29	0.38672	0.505	0.421	9.4028e-25	Tpm4	pEpiC1	Two-sided Wilcoxon test	0.25	25
1.17847e-22	0.382019	0.612	0.62	2.74243e-18	Cdv3	pEpiC1	Two-sided Wilcoxon test	0.25	25
1.33964e-77	0.38155	0.93	0.901	3.11748e-73	Calm1	pEpiC1	Two-sided Wilcoxon test	0.25	25
2.312e-15	0.379964	0.485	0.471	5.38026e-11	Tbrg1	pEpiC1	Two-sided Wilcoxon test	0.25	25
2.83336e-13	0.379951	0.454	0.452	6.59352e-09	Capns1	pEpiC1	Two-sided Wilcoxon test	0.25	25
5.6381e-46	0.378721	0.747	0.723	1.31204e-41	Txn1	pEpiC1	Two-sided Wilcoxon test	0.25	25
3.42732e-57	0.377405	0.789	0.727	7.97572e-53	Bex3	pEpiC1	Two-sided Wilcoxon test	0.25	25
1.86823e-22	0.374934	0.308	0.233	4.34755e-18	Soat1	pEpiC1	Two-sided Wilcoxon test	0.25	25
6.70833e-33	0.373091	0.354	0.245	1.56109e-28	Tmem108	pEpiC1	Two-sided Wilcoxon test	0.25	25
1.48916e-126	0.370978	0.998	0.996	3.46542e-122	Ppia	pEpiC1	Two-sided Wilcoxon test	0.25	25
1.26491e-45	0.36943	0.797	0.784	2.94356e-41	Ptges3	pEpiC1	Two-sided Wilcoxon test	0.25	25
1.34081e-20	0.367683	0.44	0.374	3.12021e-16	Anxa5	pEpiC1	Two-sided Wilcoxon test	0.25	25
6.07651e-17	0.357344	0.55	0.548	1.41406e-12	Ostc	pEpiC1	Two-sided Wilcoxon test	0.25	25
2.43568e-11	0.355479	0.269	0.23	5.66807e-07	Rap2c	pEpiC1	Two-sided Wilcoxon test	0.25	25
9.61034e-69	0.352539	0.898	0.884	2.23642e-64	Eef1g	pEpiC1	Two-sided Wilcoxon test	0.25	25
1.78761e-22	0.350978	0.532	0.491	4.15994e-18	Bex4	pEpiC1	Two-sided Wilcoxon test	0.25	25
3.53694e-100	0.349772	0.99	0.985	8.23082e-96	Ybx1	pEpiC1	Two-sided Wilcoxon test	0.25	25
3.13499e-26	0.349434	0.649	0.635	7.29544e-22	Atp6v0c	pEpiC1	Two-sided Wilcoxon test	0.25	25
8.17631e-50	0.34908	0.806	0.785	1.90271e-45	Tpi1	pEpiC1	Two-sided Wilcoxon test	0.25	25
1.87473e-40	0.348175	0.754	0.726	4.36269e-36	Pgk1	pEpiC1	Two-sided Wilcoxon test	0.25	25
7.22991e-10	0.347095	0.467	0.485	1.68247e-05	Cyb5a	pEpiC1	Two-sided Wilcoxon test	0.25	25
6.53613e-63	0.345894	0.867	0.845	1.52102e-58	Aldoa	pEpiC1	Two-sided Wilcoxon test	0.25	25
5.77411e-19	0.345874	0.487	0.425	1.34369e-14	Hist1h2ap	pEpiC1	Two-sided Wilcoxon test	0.25	25
6.16887e-13	0.344853	0.284	0.238	1.43556e-08	Zyx	pEpiC1	Two-sided Wilcoxon test	0.25	25
4.28208e-14	0.341703	0.453	0.418	9.96483e-10	Pclaf	pEpiC1	Two-sided Wilcoxon test	0.25	25
6.72562e-08	0.341295	0.267	0.241	0.00156512	Nectin2	pEpiC1	Two-sided Wilcoxon test	0.25	25
4.22878e-10	0.338803	0.352	0.321	9.84079e-06	Rpgrip1	pEpiC1	Two-sided Wilcoxon test	0.25	25
8.67867e-80	0.337036	0.966	0.948	2.01961e-75	Ran	pEpiC1	Two-sided Wilcoxon test	0.25	25
1.63658e-12	0.335429	0.405	0.379	3.80848e-08	P4hb	pEpiC1	Two-sided Wilcoxon test	0.25	25
2.02043e-24	0.334277	0.633	0.613	4.70174e-20	Gabarap	pEpiC1	Two-sided Wilcoxon test	0.25	25
1.59344e-30	0.333109	0.715	0.701	3.7081e-26	Fkbp3	pEpiC1	Two-sided Wilcoxon test	0.25	25
7.26348e-11	0.332318	0.454	0.448	1.69029e-06	Selenok	pEpiC1	Two-sided Wilcoxon test	0.25	25
6.04043e-24	0.33151	0.455	0.37	1.40567e-19	Rhoc	pEpiC1	Two-sided Wilcoxon test	0.25	25
1.53447e-19	0.331054	0.387	0.312	3.57087e-15	Egr1	pEpiC1	Two-sided Wilcoxon test	0.25	25
3.38585e-39	0.330693	0.797	0.778	7.87922e-35	Hnrnpa1	pEpiC1	Two-sided Wilcoxon test	0.25	25
5.1438e-15	0.33036	0.282	0.224	1.19701e-10	Arid5b	pEpiC1	Two-sided Wilcoxon test	0.25	25
1.58856e-70	0.327685	0.958	0.951	3.69674e-66	Eif4a1	pEpiC1	Two-sided Wilcoxon test	0.25	25
1.26981e-14	0.327086	0.32	0.261	2.95498e-10	Rbp1	pEpiC1	Two-sided Wilcoxon test	0.25	25
6.60152e-49	0.326084	0.855	0.837	1.53624e-44	Ppp1r14b	pEpiC1	Two-sided Wilcoxon test	0.25	25
3.85597e-74	0.324856	0.941	0.911	8.97323e-70	Myl6	pEpiC1	Two-sided Wilcoxon test	0.25	25
1.15633e-58	0.323925	0.93	0.93	2.69088e-54	Hsp90aa1	pEpiC1	Two-sided Wilcoxon test	0.25	25
3.1417e-09	0.322809	0.415	0.4	7.31105e-05	Tsc22d1	pEpiC1	Two-sided Wilcoxon test	0.25	25
2.89152e-39	0.321956	0.806	0.793	6.72886e-35	Dnaja1	pEpiC1	Two-sided Wilcoxon test	0.25	25
6.11607e-07	0.319681	0.261	0.235	0.0142327	Slc24a5	pEpiC1	Two-sided Wilcoxon test	0.25	25
4.0869e-120	0.319218	0.999	0.999	9.51062e-116	Hsp90ab1	pEpiC1	Two-sided Wilcoxon test	0.25	25
1.51555e-30	0.318064	0.724	0.715	3.52683e-26	Ppib	pEpiC1	Two-sided Wilcoxon test	0.25	25
1.89234e-07	0.316658	0.454	0.472	0.00440365	Ssr2	pEpiC1	Two-sided Wilcoxon test	0.25	25
1.51516e-13	0.313987	0.574	0.573	3.52592e-09	Tpm3	pEpiC1	Two-sided Wilcoxon test	0.25	25
2.90337e-32	0.313319	0.622	0.502	6.75644e-28	Marcksl1	pEpiC1	Two-sided Wilcoxon test	0.25	25
4.07874e-23	0.312187	0.539	0.48	9.49164e-19	Gyg	pEpiC1	Two-sided Wilcoxon test	0.25	25
8.631e-28	0.308988	0.747	0.743	2.00852e-23	Cct6a	pEpiC1	Two-sided Wilcoxon test	0.25	25
3.53158e-12	0.306018	0.473	0.459	8.21835e-08	Tceal8	pEpiC1	Two-sided Wilcoxon test	0.25	25
3.65998e-10	0.305525	0.25	0.208	8.51713e-06	Ddah1	pEpiC1	Two-sided Wilcoxon test	0.25	25
3.13346e-53	0.302514	0.894	0.878	7.29187e-49	Dynll1	pEpiC1	Two-sided Wilcoxon test	0.25	25
3.32184e-100	0.302301	0.995	0.992	7.73026e-96	Gapdh	pEpiC1	Two-sided Wilcoxon test	0.25	25
1.41518e-35	0.301917	0.823	0.809	3.29326e-31	Hspe1	pEpiC1	Two-sided Wilcoxon test	0.25	25
1.1212e-09	0.299648	0.423	0.404	2.60914e-05	Snx6	pEpiC1	Two-sided Wilcoxon test	0.25	25
8.73166e-17	0.298567	0.627	0.647	2.03195e-12	St13	pEpiC1	Two-sided Wilcoxon test	0.25	25
1.63547e-23	0.298426	0.701	0.692	3.80591e-19	Bzw1	pEpiC1	Two-sided Wilcoxon test	0.25	25
0.000403383	0.297594	0.279	0.278	1	Cstb	pEpiC1	Two-sided Wilcoxon test	0.25	25
1.99827e-77	0.29746	0.986	0.981	4.65018e-73	Eef1b2	pEpiC1	Two-sided Wilcoxon test	0.25	25
0.00833461	0.297385	0.261	0.268	1	Glipr2	pEpiC1	Two-sided Wilcoxon test	0.25	25
1.50184e-19	0.297115	0.683	0.689	3.49494e-15	Arpc2	pEpiC1	Two-sided Wilcoxon test	0.25	25
4.43254e-13	0.296785	0.491	0.467	1.0315e-08	Bri3	pEpiC1	Two-sided Wilcoxon test	0.25	25
0.00985198	0.295909	0.268	0.277	1	Gadd45g	pEpiC1	Two-sided Wilcoxon test	0.25	25
1.57146e-39	0.295276	0.851	0.835	3.65694e-35	Sub1	pEpiC1	Two-sided Wilcoxon test	0.25	25
5.17151e-07	0.294811	0.31	0.287	0.0120346	Ralb	pEpiC1	Two-sided Wilcoxon test	0.25	25
1.12821e-12	0.294646	0.566	0.587	2.62545e-08	Nudc	pEpiC1	Two-sided Wilcoxon test	0.25	25
0.000169234	0.29284	0.275	0.269	1	Oat	pEpiC1	Two-sided Wilcoxon test	0.25	25
6.75233e-23	0.290458	0.675	0.655	1.57134e-18	Tceal9	pEpiC1	Two-sided Wilcoxon test	0.25	25
1.48768e-22	0.28907	0.694	0.7	3.46197e-18	Vdac2	pEpiC1	Two-sided Wilcoxon test	0.25	25
9.48867e-54	0.289067	0.971	0.971	2.20811e-49	Cmss1	pEpiC1	Two-sided Wilcoxon test	0.25	25
9.45518e-13	0.287784	0.567	0.589	2.20031e-08	Rsl1d1	pEpiC1	Two-sided Wilcoxon test	0.25	25
1.31173e-07	0.287592	0.479	0.51	0.00305252	Ssr4	pEpiC1	Two-sided Wilcoxon test	0.25	25
1.85964e-37	0.287287	0.83	0.801	4.32757e-33	Cfl1	pEpiC1	Two-sided Wilcoxon test	0.25	25
1.07804e-26	0.287287	0.748	0.754	2.5087e-22	Cdc42	pEpiC1	Two-sided Wilcoxon test	0.25	25
2.79501e-18	0.285766	0.615	0.623	6.50427e-14	Swi5	pEpiC1	Two-sided Wilcoxon test	0.25	25
1.71283e-14	0.285741	0.618	0.598	3.98592e-10	Arf4	pEpiC1	Two-sided Wilcoxon test	0.25	25
5.42919e-09	0.285622	0.473	0.482	0.000126343	Sec11a	pEpiC1	Two-sided Wilcoxon test	0.25	25
2.62813e-21	0.285234	0.692	0.67	6.11593e-17	Pebp1	pEpiC1	Two-sided Wilcoxon test	0.25	25
2.96168e-43	0.284473	0.925	0.904	6.89213e-39	Ranbp1	pEpiC1	Two-sided Wilcoxon test	0.25	25
4.4983e-10	0.284437	0.516	0.521	1.0468e-05	Actr3	pEpiC1	Two-sided Wilcoxon test	0.25	25
5.95916e-23	0.283662	0.686	0.693	1.38676e-18	Tomm20	pEpiC1	Two-sided Wilcoxon test	0.25	25
1.3327e-26	0.283067	0.759	0.746	3.10133e-22	Prmt1	pEpiC1	Two-sided Wilcoxon test	0.25	25
6.53313e-37	0.282908	0.854	0.847	1.52033e-32	Rbm3	pEpiC1	Two-sided Wilcoxon test	0.25	25
9.65959e-72	0.282608	0.992	0.988	2.24788e-67	H2afz	pEpiC1	Two-sided Wilcoxon test	0.25	25
0.00042453	0.282513	0.427	0.464	1	Txndc17	pEpiC1	Two-sided Wilcoxon test	0.25	25
3.69911e-08	0.281759	0.486	0.512	0.00086082	Fis1	pEpiC1	Two-sided Wilcoxon test	0.25	25
3.24585e-11	0.2817	0.424	0.381	7.55343e-07	Myh10	pEpiC1	Two-sided Wilcoxon test	0.25	25
1.67835e-07	0.28118	0.456	0.46	0.00390568	Ssr3	pEpiC1	Two-sided Wilcoxon test	0.25	25
6.09011e-22	0.280991	0.689	0.675	1.41723e-17	Cdk4	pEpiC1	Two-sided Wilcoxon test	0.25	25
2.13513e-51	0.280908	0.912	0.886	4.96865e-47	Pfn1	pEpiC1	Two-sided Wilcoxon test	0.25	25
2.44547e-07	0.2809	0.288	0.259	0.00569084	Hmgcs1	pEpiC1	Two-sided Wilcoxon test	0.25	25
1.75691e-11	0.280834	0.527	0.536	4.08852e-07	Prelid1	pEpiC1	Two-sided Wilcoxon test	0.25	25
6.23829e-06	0.280537	0.423	0.436	0.145171	Laptm4a	pEpiC1	Two-sided Wilcoxon test	0.25	25
2.85955e-06	0.280456	0.488	0.527	0.0665446	Selenof	pEpiC1	Two-sided Wilcoxon test	0.25	25
8.30088e-113	0.280096	0.999	1	1.9317e-108	Ptma	pEpiC1	Two-sided Wilcoxon test	0.25	25
2.9995e-36	0.279233	0.829	0.788	6.98015e-32	Pkm	pEpiC1	Two-sided Wilcoxon test	0.25	25
1.41071e-05	0.279194	0.448	0.478	0.328287	Arhgdia	pEpiC1	Two-sided Wilcoxon test	0.25	25
1.9978e-24	0.278812	0.726	0.734	4.64907e-20	Cct5	pEpiC1	Two-sided Wilcoxon test	0.25	25
1.84112e-09	0.278627	0.355	0.321	4.28447e-05	Dpysl2	pEpiC1	Two-sided Wilcoxon test	0.25	25
2.54755e-05	0.275973	0.448	0.48	0.59284	Srm	pEpiC1	Two-sided Wilcoxon test	0.25	25
3.10015e-06	0.275569	0.408	0.41	0.0721436	Tln1	pEpiC1	Two-sided Wilcoxon test	0.25	25
0.00118579	0.275221	0.254	0.25	1	Tmem263	pEpiC1	Two-sided Wilcoxon test	0.25	25
3.37415e-25	0.274973	0.705	0.682	7.85198e-21	Sec61b	pEpiC1	Two-sided Wilcoxon test	0.25	25
3.57804e-09	0.273304	0.545	0.58	8.32646e-05	Fkbp4	pEpiC1	Two-sided Wilcoxon test	0.25	25
6.89141e-21	0.273278	0.71	0.713	1.6037e-16	Hnrnpab	pEpiC1	Two-sided Wilcoxon test	0.25	25
1.6277e-13	0.272669	0.627	0.656	3.78783e-09	Cacybp	pEpiC1	Two-sided Wilcoxon test	0.25	25
1.43691e-07	0.271928	0.454	0.464	0.00334384	Siva1	pEpiC1	Two-sided Wilcoxon test	0.25	25
7.38081e-27	0.271044	0.801	0.809	1.71759e-22	Nme1	pEpiC1	Two-sided Wilcoxon test	0.25	25
2.56065e-67	0.270742	0.976	0.965	5.95889e-63	H3f3b	pEpiC1	Two-sided Wilcoxon test	0.25	25
4.07361e-16	0.270711	0.66	0.675	9.4797e-12	Ubc	pEpiC1	Two-sided Wilcoxon test	0.25	25
9.14698e-59	0.270296	0.974	0.963	2.12859e-54	Rpl10	pEpiC1	Two-sided Wilcoxon test	0.25	25
5.776e-69	0.270197	0.99	0.985	1.34413e-64	Naca	pEpiC1	Two-sided Wilcoxon test	0.25	25
4.69283e-09	0.269527	0.524	0.547	0.000109207	Fam162a	pEpiC1	Two-sided Wilcoxon test	0.25	25
2.47771e-10	0.268205	0.53	0.514	5.76588e-06	Maged2	pEpiC1	Two-sided Wilcoxon test	0.25	25
2.47349e-34	0.267284	0.378	0.26	5.75606e-30	Celf2	pEpiC1	Two-sided Wilcoxon test	0.25	25
0.00865545	0.266378	0.254	0.254	1	Pgrmc1	pEpiC1	Two-sided Wilcoxon test	0.25	25
2.12168e-07	0.263725	0.352	0.328	0.00493735	Rcn3	pEpiC1	Two-sided Wilcoxon test	0.25	25
1.07875e-11	0.263711	0.593	0.589	2.51035e-07	Arl6ip1	pEpiC1	Two-sided Wilcoxon test	0.25	25
0.000162287	0.263297	0.45	0.492	1	Atp6v0e	pEpiC1	Two-sided Wilcoxon test	0.25	25
3.74451e-13	0.262235	0.602	0.615	8.71384e-09	Dut	pEpiC1	Two-sided Wilcoxon test	0.25	25
6.57149e-59	0.261785	0.988	0.976	1.52925e-54	Rpl7a	pEpiC1	Two-sided Wilcoxon test	0.25	25
5.13741e-11	0.261742	0.603	0.625	1.19553e-06	Rtraf	pEpiC1	Two-sided Wilcoxon test	0.25	25
6.98651e-21	0.260118	0.731	0.734	1.62583e-16	Snrpb	pEpiC1	Two-sided Wilcoxon test	0.25	25
9.14824e-48	0.260053	0.87	0.823	2.12889e-43	Slc25a4	pEpiC1	Two-sided Wilcoxon test	0.25	25
3.4759e-23	0.258656	0.82	0.828	8.08877e-19	Psma7	pEpiC1	Two-sided Wilcoxon test	0.25	25
4.41002e-10	0.258632	0.535	0.527	1.02626e-05	Eid1	pEpiC1	Two-sided Wilcoxon test	0.25	25
4.14452e-121	0.256205	1	1	9.64471e-117	Eef1a1	pEpiC1	Two-sided Wilcoxon test	0.25	25
0.000947657	0.256094	0.359	0.372	1	Prdx4	pEpiC1	Two-sided Wilcoxon test	0.25	25
4.87271e-14	0.255925	0.615	0.618	1.13393e-09	Mrfap1	pEpiC1	Two-sided Wilcoxon test	0.25	25
1.8129e-08	0.255741	0.533	0.567	0.000421881	Ube2m	pEpiC1	Two-sided Wilcoxon test	0.25	25
3.08998e-63	0.255229	0.997	0.993	7.19068e-59	Rpl9	pEpiC1	Two-sided Wilcoxon test	0.25	25
3.82676e-07	0.255225	0.325	0.297	0.00890525	Cnn2	pEpiC1	Two-sided Wilcoxon test	0.25	25
0.00275197	0.254686	0.27	0.268	1	Slc16a3	pEpiC1	Two-sided Wilcoxon test	0.25	25
1.69736e-30	0.25398	0.841	0.838	3.94992e-26	Hint1	pEpiC1	Two-sided Wilcoxon test	0.25	25
1.26519e-06	0.25173	0.502	0.531	0.0294423	Trmt112	pEpiC1	Two-sided Wilcoxon test	0.25	25
4.83739e-63	0.251601	0.998	0.994	1.12571e-58	Rps3	pEpiC1	Two-sided Wilcoxon test	0.25	25
7.31758e-12	0.251012	0.62	0.628	1.70287e-07	Arf1	pEpiC1	Two-sided Wilcoxon test	0.25	25
4.54198e-26	0.250575	0.798	0.806	1.05696e-21	Eef1d	pEpiC1	Two-sided Wilcoxon test	0.25	25
5.00208e-38	0.250272	0.936	0.92	1.16403e-33	Prdx1	pEpiC1	Two-sided Wilcoxon test	0.25	25
0	2.96826	0.969	0.182	0	Ptprm	EC/EndoC	Two-sided Wilcoxon test	0.25	25
0	2.50653	0.893	0.162	0	Nrxn3	EC/EndoC	Two-sided Wilcoxon test	0.25	25
0	2.47521	0.918	0.197	0	Ebf1	EC/EndoC	Two-sided Wilcoxon test	0.25	25
0	2.26594	0.606	0.08	0	Trpm3	EC/EndoC	Two-sided Wilcoxon test	0.25	25
0	2.13272	0.908	0.481	0	Klf2	EC/EndoC	Two-sided Wilcoxon test	0.25	25
0	2.03782	0.934	0.341	0	Pde4d	EC/EndoC	Two-sided Wilcoxon test	0.25	25
0	1.96913	0.936	0.326	0	Grip1	EC/EndoC	Two-sided Wilcoxon test	0.25	25
8.62547e-281	1.90922	0.984	0.896	2.00723e-276	Cdkn1c	EC/EndoC	Two-sided Wilcoxon test	0.25	25
0	1.86319	0.874	0.319	0	Ramp2	EC/EndoC	Two-sided Wilcoxon test	0.25	25
0	1.81322	0.87	0.09	0	Elmo1	EC/EndoC	Two-sided Wilcoxon test	0.25	25
0	1.77581	0.575	0.079	0	Nav3	EC/EndoC	Two-sided Wilcoxon test	0.25	25
0	1.72246	0.881	0.23	0	Creb5	EC/EndoC	Two-sided Wilcoxon test	0.25	25
0	1.72139	0.83	0.087	0	Flt1	EC/EndoC	Two-sided Wilcoxon test	0.25	25
0	1.69044	0.935	0.307	0	Maml2	EC/EndoC	Two-sided Wilcoxon test	0.25	25
0	1.69029	0.914	0.277	0	Mast4	EC/EndoC	Two-sided Wilcoxon test	0.25	25
0	1.64939	0.679	0.095	0	Col23a1	EC/EndoC	Two-sided Wilcoxon test	0.25	25
0	1.64191	0.903	0.287	0	Plagl1	EC/EndoC	Two-sided Wilcoxon test	0.25	25
0	1.63386	0.985	0.873	0	Vim	EC/EndoC	Two-sided Wilcoxon test	0.25	25
0	1.59795	0.876	0.244	0	Col4a1	EC/EndoC	Two-sided Wilcoxon test	0.25	25
0	1.59652	0.93	0.428	0	Fn1	EC/EndoC	Two-sided Wilcoxon test	0.25	25
0	1.54409	0.87	0.209	0	Gab2	EC/EndoC	Two-sided Wilcoxon test	0.25	25
0	1.53779	0.928	0.323	0	Col18a1	EC/EndoC	Two-sided Wilcoxon test	0.25	25
0	1.53331	0.7	0.109	0	Emcn	EC/EndoC	Two-sided Wilcoxon test	0.25	25
0	1.5257	0.798	0.136	0	Plvap	EC/EndoC	Two-sided Wilcoxon test	0.25	25
0	1.51395	0.912	0.29	0	Mir99ahg	EC/EndoC	Two-sided Wilcoxon test	0.25	25
0	1.50469	0.976	0.506	0	Airn	EC/EndoC	Two-sided Wilcoxon test	0.25	25
0	1.44346	0.837	0.099	0	Tek	EC/EndoC	Two-sided Wilcoxon test	0.25	25
0	1.44118	0.895	0.417	0	Apoe	EC/EndoC	Two-sided Wilcoxon test	0.25	25
0	1.42996	0.94	0.419	0	Ppp3ca	EC/EndoC	Two-sided Wilcoxon test	0.25	25
0	1.4277	0.926	0.382	0	Spag9	EC/EndoC	Two-sided Wilcoxon test	0.25	25
0	1.42293	0.752	0.086	0	Prex2	EC/EndoC	Two-sided Wilcoxon test	0.25	25
0	1.42262	0.894	0.26	0	Zswim6	EC/EndoC	Two-sided Wilcoxon test	0.25	25
0	1.41885	0.917	0.272	0	Nfia	EC/EndoC	Two-sided Wilcoxon test	0.25	25
0	1.41522	0.944	0.32	0	Nfib	EC/EndoC	Two-sided Wilcoxon test	0.25	25
0	1.40156	0.705	0.105	0	Npr3	EC/EndoC	Two-sided Wilcoxon test	0.25	25
0	1.39513	0.845	0.423	0	Ctsl	EC/EndoC	Two-sided Wilcoxon test	0.25	25
0	1.39492	0.829	0.105	0	Pecam1	EC/EndoC	Two-sided Wilcoxon test	0.25	25
0	1.38681	0.845	0.185	0	Cemip2	EC/EndoC	Two-sided Wilcoxon test	0.25	25
0	1.38672	0.757	0.139	0	Greb1l	EC/EndoC	Two-sided Wilcoxon test	0.25	25
0	1.38594	0.928	0.41	0	Akap13	EC/EndoC	Two-sided Wilcoxon test	0.25	25
0	1.38288	0.765	0.07	0	Cdh5	EC/EndoC	Two-sided Wilcoxon test	0.25	25
0	1.3825	0.74	0.082	0	Rapgef5	EC/EndoC	Two-sided Wilcoxon test	0.25	25
0	1.37582	0.94	0.702	0	Rdx	EC/EndoC	Two-sided Wilcoxon test	0.25	25
0	1.36064	0.741	0.06	0	Prkch	EC/EndoC	Two-sided Wilcoxon test	0.25	25
0	1.35415	0.873	0.24	0	Ptprg	EC/EndoC	Two-sided Wilcoxon test	0.25	25
0	1.33734	0.846	0.297	0	Tmem164	EC/EndoC	Two-sided Wilcoxon test	0.25	25
0	1.33206	0.722	0.155	0	Edil3	EC/EndoC	Two-sided Wilcoxon test	0.25	25
0	1.32825	0.813	0.215	0	Itpr1	EC/EndoC	Two-sided Wilcoxon test	0.25	25
0	1.32653	0.875	0.287	0	Dlc1	EC/EndoC	Two-sided Wilcoxon test	0.25	25
0	1.31654	0.937	0.416	0	Sptbn1	EC/EndoC	Two-sided Wilcoxon test	0.25	25
0	1.30822	0.938	0.366	0	Foxn3	EC/EndoC	Two-sided Wilcoxon test	0.25	25
0	1.30695	0.708	0.068	0	Klhl4	EC/EndoC	Two-sided Wilcoxon test	0.25	25
0	1.3068	0.555	0.08	0	Nrg1	EC/EndoC	Two-sided Wilcoxon test	0.25	25
1.51994e-277	1.30477	0.872	0.57	3.53705e-273	Tagln2	EC/EndoC	Two-sided Wilcoxon test	0.25	25
0	1.30142	0.807	0.182	0	Col4a2	EC/EndoC	Two-sided Wilcoxon test	0.25	25
0	1.29756	0.847	0.363	0	Igfbp4	EC/EndoC	Two-sided Wilcoxon test	0.25	25
0	1.29224	0.764	0.2	0	Man1a	EC/EndoC	Two-sided Wilcoxon test	0.25	25
0	1.28904	0.841	0.155	0	Srgap1	EC/EndoC	Two-sided Wilcoxon test	0.25	25
0	1.28818	0.833	0.161	0	Hspg2	EC/EndoC	Two-sided Wilcoxon test	0.25	25
0	1.28214	0.748	0.086	0	Itpr2	EC/EndoC	Two-sided Wilcoxon test	0.25	25
0	1.2658	0.761	0.101	0	Calcrl	EC/EndoC	Two-sided Wilcoxon test	0.25	25
0	1.26384	0.819	0.191	0	Ece1	EC/EndoC	Two-sided Wilcoxon test	0.25	25
0	1.26308	0.928	0.397	0	Ext1	EC/EndoC	Two-sided Wilcoxon test	0.25	25
0	1.22774	0.633	0.167	0	Limch1	EC/EndoC	Two-sided Wilcoxon test	0.25	25
0	1.22583	0.913	0.352	0	Jmjd1c	EC/EndoC	Two-sided Wilcoxon test	0.25	25
0	1.22282	0.683	0.164	0	Slit2	EC/EndoC	Two-sided Wilcoxon test	0.25	25
0	1.22179	0.836	0.31	0	Kcnq5	EC/EndoC	Two-sided Wilcoxon test	0.25	25
0	1.22179	0.589	0.061	0	Ldb2	EC/EndoC	Two-sided Wilcoxon test	0.25	25
0	1.22006	0.877	0.261	0	Cgnl1	EC/EndoC	Two-sided Wilcoxon test	0.25	25
9.01971e-262	1.21177	0.911	0.656	2.09898e-257	Jun	EC/EndoC	Two-sided Wilcoxon test	0.25	25
0	1.21122	0.859	0.353	0	Prkg1	EC/EndoC	Two-sided Wilcoxon test	0.25	25
0	1.21061	0.819	0.195	0	Zfp521	EC/EndoC	Two-sided Wilcoxon test	0.25	25
0	1.20899	0.858	0.306	0	Zeb1	EC/EndoC	Two-sided Wilcoxon test	0.25	25
0	1.20662	0.841	0.201	0	Arhgap31	EC/EndoC	Two-sided Wilcoxon test	0.25	25
0	1.20419	0.789	0.149	0	Tspan18	EC/EndoC	Two-sided Wilcoxon test	0.25	25
0	1.20295	0.963	0.45	0	Auts2	EC/EndoC	Two-sided Wilcoxon test	0.25	25
0	1.19808	0.934	0.486	0	Rrbp1	EC/EndoC	Two-sided Wilcoxon test	0.25	25
0	1.19771	0.672	0.081	0	Pde1c	EC/EndoC	Two-sided Wilcoxon test	0.25	25
0	1.19631	0.794	0.194	0	Lhfp	EC/EndoC	Two-sided Wilcoxon test	0.25	25
0	1.19277	0.964	0.527	0	Igf2r	EC/EndoC	Two-sided Wilcoxon test	0.25	25
0	1.1926	0.797	0.149	0	Fbn1	EC/EndoC	Two-sided Wilcoxon test	0.25	25
0	1.19086	0.916	0.385	0	Mef2a	EC/EndoC	Two-sided Wilcoxon test	0.25	25
0	1.18958	0.836	0.226	0	Gmds	EC/EndoC	Two-sided Wilcoxon test	0.25	25
0	1.17995	0.932	0.485	0	Rbms1	EC/EndoC	Two-sided Wilcoxon test	0.25	25
0	1.17877	0.893	0.335	0	Tcf4	EC/EndoC	Two-sided Wilcoxon test	0.25	25
0	1.17664	0.651	0.082	0	Kdr	EC/EndoC	Two-sided Wilcoxon test	0.25	25
0	1.17642	0.859	0.256	0	Fndc3b	EC/EndoC	Two-sided Wilcoxon test	0.25	25
0	1.17634	0.784	0.239	0	Egfl7	EC/EndoC	Two-sided Wilcoxon test	0.25	25
0	1.17122	0.677	0.104	0	Itga9	EC/EndoC	Two-sided Wilcoxon test	0.25	25
0	1.17102	0.813	0.357	0	Hapln1	EC/EndoC	Two-sided Wilcoxon test	0.25	25
0	1.16731	0.729	0.173	0	Hecw2	EC/EndoC	Two-sided Wilcoxon test	0.25	25
0	1.13548	0.742	0.102	0	Fli1	EC/EndoC	Two-sided Wilcoxon test	0.25	25
0	1.13263	0.742	0.171	0	Vav3	EC/EndoC	Two-sided Wilcoxon test	0.25	25
0	1.12452	0.714	0.159	0	Dennd5b	EC/EndoC	Two-sided Wilcoxon test	0.25	25
0	1.12355	0.594	0.119	0	Nhs	EC/EndoC	Two-sided Wilcoxon test	0.25	25
0	1.11952	0.657	0.098	0	Adgrg6	EC/EndoC	Two-sided Wilcoxon test	0.25	25
0	1.11773	0.872	0.517	0	Cd81	EC/EndoC	Two-sided Wilcoxon test	0.25	25
0	1.1144	0.846	0.207	0	Dock1	EC/EndoC	Two-sided Wilcoxon test	0.25	25
5.99983e-253	1.11008	0.735	0.325	1.39622e-248	Atf3	EC/EndoC	Two-sided Wilcoxon test	0.25	25
0	1.10811	0.927	0.451	0	Baz2b	EC/EndoC	Two-sided Wilcoxon test	0.25	25
0	1.10196	0.688	0.122	0	Icam2	EC/EndoC	Two-sided Wilcoxon test	0.25	25
0	1.0924	0.669	0.05	0	Rasgrp3	EC/EndoC	Two-sided Wilcoxon test	0.25	25
0	1.08882	0.907	0.346	0	Map4k4	EC/EndoC	Two-sided Wilcoxon test	0.25	25
0	1.08265	0.846	0.237	0	Trio	EC/EndoC	Two-sided Wilcoxon test	0.25	25
1.36758e-209	1.0824	0.911	0.651	3.1825e-205	Mest	EC/EndoC	Two-sided Wilcoxon test	0.25	25
1.52298e-304	1.08184	0.771	0.379	3.54412e-300	Ifitm2	EC/EndoC	Two-sided Wilcoxon test	0.25	25
0	1.08117	0.587	0.104	0	Cobll1	EC/EndoC	Two-sided Wilcoxon test	0.25	25
0	1.07869	0.677	0.097	0	Tgfbr3	EC/EndoC	Two-sided Wilcoxon test	0.25	25
0	1.07624	0.623	0.047	0	Gimap6	EC/EndoC	Two-sided Wilcoxon test	0.25	25
0	1.06061	0.918	0.393	0	Foxp1	EC/EndoC	Two-sided Wilcoxon test	0.25	25
0	1.06029	0.818	0.262	0	Fbxl17	EC/EndoC	Two-sided Wilcoxon test	0.25	25
0	1.05344	0.832	0.338	0	Msn	EC/EndoC	Two-sided Wilcoxon test	0.25	25
0	1.04812	0.77	0.31	0	Rhob	EC/EndoC	Two-sided Wilcoxon test	0.25	25
0	1.04787	0.614	0.025	0	Shank3	EC/EndoC	Two-sided Wilcoxon test	0.25	25
0	1.04608	0.828	0.28	0	Spats2	EC/EndoC	Two-sided Wilcoxon test	0.25	25
0	1.03875	0.741	0.183	0	Frmd4b	EC/EndoC	Two-sided Wilcoxon test	0.25	25
0	1.03525	0.536	0.065	0	Pde7b	EC/EndoC	Two-sided Wilcoxon test	0.25	25
0	1.03464	0.695	0.154	0	Tshz2	EC/EndoC	Two-sided Wilcoxon test	0.25	25
0	1.03451	0.754	0.14	0	Nav1	EC/EndoC	Two-sided Wilcoxon test	0.25	25
0	1.03253	0.786	0.175	0	Asap2	EC/EndoC	Two-sided Wilcoxon test	0.25	25
0	1.03107	0.883	0.321	0	Pard3	EC/EndoC	Two-sided Wilcoxon test	0.25	25
3.54048e-282	1.02985	0.871	0.579	8.23906e-278	Gnai2	EC/EndoC	Two-sided Wilcoxon test	0.25	25
0	1.02543	0.67	0.2	0	Nfkbia	EC/EndoC	Two-sided Wilcoxon test	0.25	25
0	1.02329	0.645	0.124	0	Stxbp6	EC/EndoC	Two-sided Wilcoxon test	0.25	25
0	1.01941	0.811	0.219	0	Myo1b	EC/EndoC	Two-sided Wilcoxon test	0.25	25
0	1.01884	0.836	0.316	0	Sik3	EC/EndoC	Two-sided Wilcoxon test	0.25	25
0	1.01436	0.794	0.236	0	Fyn	EC/EndoC	Two-sided Wilcoxon test	0.25	25
0	1.00919	0.636	0.1	0	Ednrb	EC/EndoC	Two-sided Wilcoxon test	0.25	25
0	1.00828	0.748	0.117	0	Elk3	EC/EndoC	Two-sided Wilcoxon test	0.25	25
0	1.00799	0.807	0.241	0	Arhgap28	EC/EndoC	Two-sided Wilcoxon test	0.25	25
0	1.00729	0.677	0.068	0	Plxnd1	EC/EndoC	Two-sided Wilcoxon test	0.25	25
0	1.00691	0.773	0.171	0	Map3k3	EC/EndoC	Two-sided Wilcoxon test	0.25	25
0	1.00398	0.752	0.204	0	Agap1	EC/EndoC	Two-sided Wilcoxon test	0.25	25
0	0.996245	0.941	0.51	0	Ankrd11	EC/EndoC	Two-sided Wilcoxon test	0.25	25
0	0.992245	0.812	0.247	0	Zfpm2	EC/EndoC	Two-sided Wilcoxon test	0.25	25
0	0.990845	0.583	0.067	0	Ctla2a	EC/EndoC	Two-sided Wilcoxon test	0.25	25
0	0.988416	0.657	0.066	0	Nfatc1	EC/EndoC	Two-sided Wilcoxon test	0.25	25
0	0.986708	0.723	0.197	0	Ralgapa2	EC/EndoC	Two-sided Wilcoxon test	0.25	25
0	0.982898	0.734	0.147	0	Sh3d19	EC/EndoC	Two-sided Wilcoxon test	0.25	25
0	0.982613	0.869	0.346	0	Ptk2	EC/EndoC	Two-sided Wilcoxon test	0.25	25
0	0.981124	0.784	0.312	0	Anxa2	EC/EndoC	Two-sided Wilcoxon test	0.25	25
0	0.979503	0.571	0.145	0	Cavin2	EC/EndoC	Two-sided Wilcoxon test	0.25	25
0	0.978818	0.644	0.103	0	Ecscr	EC/EndoC	Two-sided Wilcoxon test	0.25	25
0	0.974664	0.753	0.141	0	Nid1	EC/EndoC	Two-sided Wilcoxon test	0.25	25
0	0.969873	0.694	0.088	0	Rhoj	EC/EndoC	Two-sided Wilcoxon test	0.25	25
0	0.968623	0.723	0.275	0	Tmx4	EC/EndoC	Two-sided Wilcoxon test	0.25	25
1.14545e-284	0.968421	0.786	0.359	2.66558e-280	Klf6	EC/EndoC	Two-sided Wilcoxon test	0.25	25
0	0.967556	0.75	0.126	0	Afap1l1	EC/EndoC	Two-sided Wilcoxon test	0.25	25
0	0.964797	0.779	0.212	0	Prkce	EC/EndoC	Two-sided Wilcoxon test	0.25	25
0	0.96232	0.941	0.572	0	Rab2a	EC/EndoC	Two-sided Wilcoxon test	0.25	25
0	0.959687	0.75	0.27	0	Pcdh7	EC/EndoC	Two-sided Wilcoxon test	0.25	25
5.21253e-272	0.959635	0.851	0.469	1.21301e-267	Marcks	EC/EndoC	Two-sided Wilcoxon test	0.25	25
1.45694e-223	0.952236	0.845	0.495	3.39044e-219	Maged2	EC/EndoC	Two-sided Wilcoxon test	0.25	25
0	0.949704	0.612	0.148	0	Hmcn1	EC/EndoC	Two-sided Wilcoxon test	0.25	25
1.04047e-270	0.945249	0.935	0.768	2.42128e-266	Calm2	EC/EndoC	Two-sided Wilcoxon test	0.25	25
0	0.944118	0.628	0.123	0	Ankrd44	EC/EndoC	Two-sided Wilcoxon test	0.25	25
0	0.939819	0.632	0.174	0	Klf4	EC/EndoC	Two-sided Wilcoxon test	0.25	25
0	0.938053	0.855	0.362	0	Meg3	EC/EndoC	Two-sided Wilcoxon test	0.25	25
0	0.936555	0.71	0.189	0	Lrrc8c	EC/EndoC	Two-sided Wilcoxon test	0.25	25
7.48313e-284	0.934685	0.657	0.228	1.7414e-279	Tmem108	EC/EndoC	Two-sided Wilcoxon test	0.25	25
0	0.934484	0.696	0.058	0	Rasip1	EC/EndoC	Two-sided Wilcoxon test	0.25	25
1.51683e-249	0.934243	0.842	0.491	3.52982e-245	Marcksl1	EC/EndoC	Two-sided Wilcoxon test	0.25	25
0	0.930244	0.824	0.269	0	Rbms3	EC/EndoC	Two-sided Wilcoxon test	0.25	25
0	0.928853	0.846	0.303	0	Utrn	EC/EndoC	Two-sided Wilcoxon test	0.25	25
2.31825e-250	0.924942	0.934	0.513	5.3948e-246	Stag1	EC/EndoC	Two-sided Wilcoxon test	0.25	25
0	0.922949	0.732	0.176	0	F2r	EC/EndoC	Two-sided Wilcoxon test	0.25	25
0	0.922679	0.661	0.115	0	Rps6ka2	EC/EndoC	Two-sided Wilcoxon test	0.25	25
0	0.921905	0.731	0.177	0	Sorbs1	EC/EndoC	Two-sided Wilcoxon test	0.25	25
0	0.921039	0.642	0.101	0	Gngt2	EC/EndoC	Two-sided Wilcoxon test	0.25	25
7.08046e-302	0.918962	0.864	0.388	1.64769e-297	Snd1	EC/EndoC	Two-sided Wilcoxon test	0.25	25
0	0.913833	0.772	0.221	0	Magi3	EC/EndoC	Two-sided Wilcoxon test	0.25	25
0	0.91128	0.687	0.058	0	Notch1	EC/EndoC	Two-sided Wilcoxon test	0.25	25
0	0.909008	0.79	0.245	0	Etv6	EC/EndoC	Two-sided Wilcoxon test	0.25	25
0	0.908389	0.653	0.208	0	Lrrc4	EC/EndoC	Two-sided Wilcoxon test	0.25	25
0	0.905319	0.844	0.291	0	Dip2b	EC/EndoC	Two-sided Wilcoxon test	0.25	25
0	0.904487	0.736	0.162	0	Ppp1r13b	EC/EndoC	Two-sided Wilcoxon test	0.25	25
6.75242e-306	0.904222	0.726	0.276	1.57136e-301	Fosb	EC/EndoC	Two-sided Wilcoxon test	0.25	25
8.80804e-198	0.9039	0.928	0.787	2.04972e-193	Jund	EC/EndoC	Two-sided Wilcoxon test	0.25	25
0	0.899385	0.878	0.387	0	Aff4	EC/EndoC	Two-sided Wilcoxon test	0.25	25
0	0.89789	0.698	0.08	0	Eng	EC/EndoC	Two-sided Wilcoxon test	0.25	25
7.81243e-263	0.897471	0.934	0.507	1.81803e-258	Tcf12	EC/EndoC	Two-sided Wilcoxon test	0.25	25
0	0.896928	0.809	0.279	0	Srgap2	EC/EndoC	Two-sided Wilcoxon test	0.25	25
0	0.895873	0.771	0.255	0	Rasal2	EC/EndoC	Two-sided Wilcoxon test	0.25	25
0	0.895658	0.674	0.155	0	Sec24d	EC/EndoC	Two-sided Wilcoxon test	0.25	25
7.23736e-291	0.894632	0.943	0.585	1.68421e-286	Itgb1	EC/EndoC	Two-sided Wilcoxon test	0.25	25
6.82209e-302	0.894521	0.87	0.425	1.58757e-297	Aplp2	EC/EndoC	Two-sided Wilcoxon test	0.25	25
5.6818e-182	0.892218	0.767	0.365	1.32221e-177	Map1b	EC/EndoC	Two-sided Wilcoxon test	0.25	25
1.03772e-199	0.891372	0.987	0.926	2.41487e-195	Tmsb10	EC/EndoC	Two-sided Wilcoxon test	0.25	25
0	0.887022	0.762	0.208	0	Wwtr1	EC/EndoC	Two-sided Wilcoxon test	0.25	25
0	0.883572	0.845	0.291	0	Gnaq	EC/EndoC	Two-sided Wilcoxon test	0.25	25
0	0.883021	0.503	0.093	0	Ldlrad4	EC/EndoC	Two-sided Wilcoxon test	0.25	25
0	0.882406	0.646	0.184	0	Ghr	EC/EndoC	Two-sided Wilcoxon test	0.25	25
0	0.879365	0.492	0.076	0	Irx5	EC/EndoC	Two-sided Wilcoxon test	0.25	25
0	0.878934	0.69	0.115	0	Myo6	EC/EndoC	Two-sided Wilcoxon test	0.25	25
0	0.87757	0.642	0.035	0	Tie1	EC/EndoC	Two-sided Wilcoxon test	0.25	25
0	0.876558	0.807	0.315	0	Stk24	EC/EndoC	Two-sided Wilcoxon test	0.25	25
0	0.876258	0.818	0.293	0	Camta1	EC/EndoC	Two-sided Wilcoxon test	0.25	25
0	0.876067	0.768	0.219	0	Ptpn12	EC/EndoC	Two-sided Wilcoxon test	0.25	25
0	0.875376	0.453	0.049	0	Gja4	EC/EndoC	Two-sided Wilcoxon test	0.25	25
0	0.864944	0.63	0.121	0	Diaph2	EC/EndoC	Two-sided Wilcoxon test	0.25	25
2.5738e-245	0.860877	0.909	0.49	5.98948e-241	Arih1	EC/EndoC	Two-sided Wilcoxon test	0.25	25
0	0.857556	0.833	0.246	0	Mecom	EC/EndoC	Two-sided Wilcoxon test	0.25	25
0	0.85594	0.661	0.16	0	Pard3b	EC/EndoC	Two-sided Wilcoxon test	0.25	25
2.92687e-263	0.855207	0.888	0.444	6.81112e-259	Atp2b1	EC/EndoC	Two-sided Wilcoxon test	0.25	25
0	0.853566	0.857	0.327	0	Luzp1	EC/EndoC	Two-sided Wilcoxon test	0.25	25
0	0.852536	0.603	0.114	0	Parp8	EC/EndoC	Two-sided Wilcoxon test	0.25	25
0	0.851297	0.791	0.218	0	Bmpr2	EC/EndoC	Two-sided Wilcoxon test	0.25	25
0	0.851276	0.769	0.288	0	Fscn1	EC/EndoC	Two-sided Wilcoxon test	0.25	25
0	0.846057	0.917	0.347	0	Lpp	EC/EndoC	Two-sided Wilcoxon test	0.25	25
0	0.845065	0.738	0.22	0	Sgms1	EC/EndoC	Two-sided Wilcoxon test	0.25	25
0	0.843536	0.634	0.105	0	Foxo1	EC/EndoC	Two-sided Wilcoxon test	0.25	25
0	0.841768	0.663	0.149	0	Plk2	EC/EndoC	Two-sided Wilcoxon test	0.25	25
1.44061e-187	0.841328	0.964	0.868	3.35244e-183	Nme2	EC/EndoC	Two-sided Wilcoxon test	0.25	25
0	0.84053	0.634	0.122	0	Iqgap2	EC/EndoC	Two-sided Wilcoxon test	0.25	25
5.41718e-273	0.836963	0.894	0.46	1.26063e-268	Ptbp3	EC/EndoC	Two-sided Wilcoxon test	0.25	25
0	0.830297	0.861	0.301	0	App	EC/EndoC	Two-sided Wilcoxon test	0.25	25
0	0.830122	0.747	0.188	0	Ttc28	EC/EndoC	Two-sided Wilcoxon test	0.25	25
0	0.825587	0.732	0.225	0	Rapgef2	EC/EndoC	Two-sided Wilcoxon test	0.25	25
6.64257e-269	0.824435	0.897	0.457	1.54579e-264	Asap1	EC/EndoC	Two-sided Wilcoxon test	0.25	25
0	0.823795	0.669	0.156	0	Sash1	EC/EndoC	Two-sided Wilcoxon test	0.25	25
0	0.823464	0.818	0.255	0	Farp1	EC/EndoC	Two-sided Wilcoxon test	0.25	25
0	0.822744	0.628	0.181	0	Gng11	EC/EndoC	Two-sided Wilcoxon test	0.25	25
0	0.82225	0.788	0.252	0	Zdhhc20	EC/EndoC	Two-sided Wilcoxon test	0.25	25
0	0.819022	0.611	0.159	0	Pycard	EC/EndoC	Two-sided Wilcoxon test	0.25	25
0	0.81628	0.677	0.139	0	Igf1	EC/EndoC	Two-sided Wilcoxon test	0.25	25
0	0.809228	0.595	0.05	0	Esam	EC/EndoC	Two-sided Wilcoxon test	0.25	25
0	0.802712	0.684	0.138	0	Ets1	EC/EndoC	Two-sided Wilcoxon test	0.25	25
5.88424e-242	0.80142	0.752	0.322	1.36932e-237	Arl15	EC/EndoC	Two-sided Wilcoxon test	0.25	25
2.95626e-285	0.796854	0.865	0.395	6.87952e-281	Fermt2	EC/EndoC	Two-sided Wilcoxon test	0.25	25
5.02815e-250	0.795515	0.886	0.555	1.1701e-245	Tpm3	EC/EndoC	Two-sided Wilcoxon test	0.25	25
2.14104e-213	0.7949	0.917	0.622	4.98241e-209	Serpinh1	EC/EndoC	Two-sided Wilcoxon test	0.25	25
0	0.793819	0.738	0.245	0	Ltbp1	EC/EndoC	Two-sided Wilcoxon test	0.25	25
1.95154e-219	0.793423	0.869	0.435	4.54143e-215	St6galnac3	EC/EndoC	Two-sided Wilcoxon test	0.25	25
0	0.792932	0.771	0.247	0	Epb41l2	EC/EndoC	Two-sided Wilcoxon test	0.25	25
1.25385e-244	0.791949	0.917	0.501	2.91783e-240	Nktr	EC/EndoC	Two-sided Wilcoxon test	0.25	25
0	0.789939	0.676	0.159	0	Ski	EC/EndoC	Two-sided Wilcoxon test	0.25	25
0	0.788675	0.639	0.1	0	Spata6	EC/EndoC	Two-sided Wilcoxon test	0.25	25
3.71894e-60	0.787868	0.96	0.891	8.65434e-56	Fabp5	EC/EndoC	Two-sided Wilcoxon test	0.25	25
0	0.787123	0.834	0.314	0	Nf1	EC/EndoC	Two-sided Wilcoxon test	0.25	25
6.98676e-171	0.78627	0.841	0.542	1.62589e-166	Ier2	EC/EndoC	Two-sided Wilcoxon test	0.25	25
0	0.785855	0.526	0.069	0	Shroom4	EC/EndoC	Two-sided Wilcoxon test	0.25	25
1.15162e-239	0.785593	0.762	0.33	2.67994e-235	Kcnq1ot1	EC/EndoC	Two-sided Wilcoxon test	0.25	25
0	0.785297	0.68	0.214	0	Col3a1	EC/EndoC	Two-sided Wilcoxon test	0.25	25
0	0.784845	0.589	0.17	0	Gsta4	EC/EndoC	Two-sided Wilcoxon test	0.25	25
3.62442e-262	0.784806	0.915	0.495	8.43438e-258	Gsk3b	EC/EndoC	Two-sided Wilcoxon test	0.25	25
0	0.779388	0.644	0.075	0	Dock6	EC/EndoC	Two-sided Wilcoxon test	0.25	25
0	0.778615	0.708	0.194	0	Cdk17	EC/EndoC	Two-sided Wilcoxon test	0.25	25
1.37509e-271	0.777664	0.857	0.442	3.19998e-267	Rap1b	EC/EndoC	Two-sided Wilcoxon test	0.25	25
1.45033e-115	0.777417	0.895	0.788	3.37507e-111	H19	EC/EndoC	Two-sided Wilcoxon test	0.25	25
0	0.777408	0.718	0.201	0	Nrp1	EC/EndoC	Two-sided Wilcoxon test	0.25	25
2.58257e-279	0.777092	0.603	0.194	6.0099e-275	Mcc	EC/EndoC	Two-sided Wilcoxon test	0.25	25
0	0.776428	0.63	0.149	0	Rai14	EC/EndoC	Two-sided Wilcoxon test	0.25	25
0	0.775474	0.411	0.071	0	Edn1	EC/EndoC	Two-sided Wilcoxon test	0.25	25
6.55591e-203	0.771677	0.878	0.656	1.52563e-198	Clic1	EC/EndoC	Two-sided Wilcoxon test	0.25	25
2.23837e-194	0.77098	0.863	0.545	5.20892e-190	Crip2	EC/EndoC	Two-sided Wilcoxon test	0.25	25
1.42414e-291	0.770692	0.733	0.28	3.31411e-287	Tbc1d5	EC/EndoC	Two-sided Wilcoxon test	0.25	25
0	0.769295	0.626	0.056	0	Klhl6	EC/EndoC	Two-sided Wilcoxon test	0.25	25
1.4636e-256	0.765872	0.952	0.722	3.40594e-252	Fus	EC/EndoC	Two-sided Wilcoxon test	0.25	25
5.10858e-178	0.765429	0.733	0.373	1.18882e-173	Crip1	EC/EndoC	Two-sided Wilcoxon test	0.25	25
0	0.765402	0.811	0.294	0	Erbin	EC/EndoC	Two-sided Wilcoxon test	0.25	25
8.96638e-210	0.763507	0.928	0.754	2.08657e-205	Pdia3	EC/EndoC	Two-sided Wilcoxon test	0.25	25
0	0.762862	0.712	0.227	0	Cmip	EC/EndoC	Two-sided Wilcoxon test	0.25	25
3.13427e-261	0.7617	0.907	0.458	7.29376e-257	Ctnna1	EC/EndoC	Two-sided Wilcoxon test	0.25	25
0	0.760372	0.753	0.267	0	Zfp704	EC/EndoC	Two-sided Wilcoxon test	0.25	25
0	0.760074	0.599	0.035	0	Fgd5	EC/EndoC	Two-sided Wilcoxon test	0.25	25
0	0.759926	0.6	0.115	0	Rasgef1b	EC/EndoC	Two-sided Wilcoxon test	0.25	25
0	0.759117	0.61	0.047	0	Cd93	EC/EndoC	Two-sided Wilcoxon test	0.25	25
0	0.755263	0.782	0.27	0	Apc	EC/EndoC	Two-sided Wilcoxon test	0.25	25
0	0.755126	0.52	0.07	0	Col13a1	EC/EndoC	Two-sided Wilcoxon test	0.25	25
0	0.751175	0.623	0.156	0	Itgav	EC/EndoC	Two-sided Wilcoxon test	0.25	25
0	0.75117	0.609	0.088	0	Ica1	EC/EndoC	Two-sided Wilcoxon test	0.25	25
2.59451e-295	0.750721	0.775	0.325	6.03767e-291	Tut7	EC/EndoC	Two-sided Wilcoxon test	0.25	25
2.35016e-207	0.750181	0.895	0.52	5.46905e-203	Rtn4	EC/EndoC	Two-sided Wilcoxon test	0.25	25
0	0.749335	0.768	0.289	0	Nfat5	EC/EndoC	Two-sided Wilcoxon test	0.25	25
0	0.745612	0.508	0.038	0	Ptprb	EC/EndoC	Two-sided Wilcoxon test	0.25	25
0	0.745179	0.459	0.032	0	Csgalnact1	EC/EndoC	Two-sided Wilcoxon test	0.25	25
2.3714e-250	0.744872	0.671	0.254	5.5185e-246	Akap12	EC/EndoC	Two-sided Wilcoxon test	0.25	25
9.92932e-169	0.744531	0.941	0.805	2.31065e-164	Hsp90b1	EC/EndoC	Two-sided Wilcoxon test	0.25	25
0	0.744432	0.577	0.112	0	Adamts1	EC/EndoC	Two-sided Wilcoxon test	0.25	25
0	0.743869	0.577	0.129	0	Dock4	EC/EndoC	Two-sided Wilcoxon test	0.25	25
0	0.742616	0.811	0.326	0	Lamp2	EC/EndoC	Two-sided Wilcoxon test	0.25	25
4.56678e-139	0.741233	0.988	0.958	1.06274e-134	mt-Cytb	EC/EndoC	Two-sided Wilcoxon test	0.25	25
0	0.740473	0.608	0.123	0	Hivep2	EC/EndoC	Two-sided Wilcoxon test	0.25	25
0	0.740216	0.663	0.133	0	Acvr1	EC/EndoC	Two-sided Wilcoxon test	0.25	25
6.25061e-265	0.739903	0.792	0.338	1.45458e-260	Dnajc1	EC/EndoC	Two-sided Wilcoxon test	0.25	25
2.26792e-243	0.739122	0.855	0.408	5.27767e-239	Trip12	EC/EndoC	Two-sided Wilcoxon test	0.25	25
0	0.738817	0.576	0.082	0	Peli2	EC/EndoC	Two-sided Wilcoxon test	0.25	25
1.25971e-233	0.73805	0.917	0.58	2.93148e-229	Arf4	EC/EndoC	Two-sided Wilcoxon test	0.25	25
1.43255e-224	0.737586	0.878	0.436	3.33369e-220	Rere	EC/EndoC	Two-sided Wilcoxon test	0.25	25
1.8992e-265	0.736748	0.76	0.32	4.41963e-261	Nrip1	EC/EndoC	Two-sided Wilcoxon test	0.25	25
1.13711e-272	0.736203	0.807	0.364	2.64618e-268	Btg1	EC/EndoC	Two-sided Wilcoxon test	0.25	25
5.78127e-272	0.734886	0.611	0.215	1.34536e-267	Junb	EC/EndoC	Two-sided Wilcoxon test	0.25	25
0	0.73213	0.682	0.179	0	Mical2	EC/EndoC	Two-sided Wilcoxon test	0.25	25
0	0.731784	0.605	0.142	0	Peak1	EC/EndoC	Two-sided Wilcoxon test	0.25	25
0	0.730373	0.782	0.319	0	Atp1b3	EC/EndoC	Two-sided Wilcoxon test	0.25	25
8.36353e-214	0.728825	0.859	0.46	1.94628e-209	Lims1	EC/EndoC	Two-sided Wilcoxon test	0.25	25
0	0.72809	0.764	0.296	0	Galnt1	EC/EndoC	Two-sided Wilcoxon test	0.25	25
0	0.727887	0.466	0.081	0	Adam12	EC/EndoC	Two-sided Wilcoxon test	0.25	25
0	0.726825	0.819	0.329	0	Usp3	EC/EndoC	Two-sided Wilcoxon test	0.25	25
1.79776e-261	0.726758	0.773	0.321	4.18357e-257	Arid1b	EC/EndoC	Two-sided Wilcoxon test	0.25	25
4.38845e-202	0.721159	0.74	0.399	1.02124e-197	Sh3bgrl3	EC/EndoC	Two-sided Wilcoxon test	0.25	25
3.69128e-226	0.71994	0.741	0.343	8.58998e-222	Ddah2	EC/EndoC	Two-sided Wilcoxon test	0.25	25
7.0712e-201	0.719356	0.861	0.433	1.64554e-196	Exoc4	EC/EndoC	Two-sided Wilcoxon test	0.25	25
0	0.716043	0.628	0.128	0	Dapk1	EC/EndoC	Two-sided Wilcoxon test	0.25	25
4.18228e-211	0.715786	0.914	0.489	9.73259e-207	Qk	EC/EndoC	Two-sided Wilcoxon test	0.25	25
0	0.715668	0.742	0.232	0	Smad7	EC/EndoC	Two-sided Wilcoxon test	0.25	25
0	0.713348	0.738	0.236	0	Ptprk	EC/EndoC	Two-sided Wilcoxon test	0.25	25
1.91716e-219	0.713127	0.825	0.447	4.46142e-215	Ppp1r2	EC/EndoC	Two-sided Wilcoxon test	0.25	25
0	0.712368	0.769	0.289	0	Fam172a	EC/EndoC	Two-sided Wilcoxon test	0.25	25
0	0.712251	0.715	0.229	0	Nbea	EC/EndoC	Two-sided Wilcoxon test	0.25	25
0	0.711973	0.765	0.226	0	Sptan1	EC/EndoC	Two-sided Wilcoxon test	0.25	25
9.88713e-304	0.711629	0.606	0.198	2.30083e-299	Dennd4a	EC/EndoC	Two-sided Wilcoxon test	0.25	25
0	0.711078	0.695	0.215	0	Ssh2	EC/EndoC	Two-sided Wilcoxon test	0.25	25
0	0.711065	0.84	0.309	0	Mbnl2	EC/EndoC	Two-sided Wilcoxon test	0.25	25
0	0.710513	0.561	0.091	0	Dock9	EC/EndoC	Two-sided Wilcoxon test	0.25	25
0	0.710505	0.677	0.21	0	Fbxl7	EC/EndoC	Two-sided Wilcoxon test	0.25	25
3.91232e-244	0.706978	0.847	0.407	9.10436e-240	Rlim	EC/EndoC	Two-sided Wilcoxon test	0.25	25
2.4296e-275	0.706711	0.588	0.184	5.65391e-271	Plxna4	EC/EndoC	Two-sided Wilcoxon test	0.25	25
4.43563e-207	0.706371	0.831	0.408	1.03222e-202	Rapgef6	EC/EndoC	Two-sided Wilcoxon test	0.25	25
5.14905e-287	0.702932	0.772	0.3	1.19824e-282	Tmcc1	EC/EndoC	Two-sided Wilcoxon test	0.25	25
0	0.70287	0.601	0.068	0	Hdac7	EC/EndoC	Two-sided Wilcoxon test	0.25	25
0	0.702616	0.745	0.227	0	Sbf2	EC/EndoC	Two-sided Wilcoxon test	0.25	25
1.00588e-234	0.70227	0.872	0.416	2.34079e-230	Ankrd17	EC/EndoC	Two-sided Wilcoxon test	0.25	25
2.81005e-304	0.699659	0.786	0.313	6.53926e-300	Tjp1	EC/EndoC	Two-sided Wilcoxon test	0.25	25
0	0.698229	0.584	0.116	0	Vamp5	EC/EndoC	Two-sided Wilcoxon test	0.25	25
0	0.697024	0.503	0.06	0	Rgs7bp	EC/EndoC	Two-sided Wilcoxon test	0.25	25
0	0.694373	0.585	0.153	0	Smad6	EC/EndoC	Two-sided Wilcoxon test	0.25	25
0	0.691571	0.774	0.267	0	Slc38a1	EC/EndoC	Two-sided Wilcoxon test	0.25	25
0	0.689919	0.708	0.23	0	Cotl1	EC/EndoC	Two-sided Wilcoxon test	0.25	25
1.3725e-237	0.689756	0.834	0.386	3.19395e-233	Eml4	EC/EndoC	Two-sided Wilcoxon test	0.25	25
0	0.689349	0.721	0.252	0	Jak1	EC/EndoC	Two-sided Wilcoxon test	0.25	25
1.54116e-275	0.687933	0.585	0.185	3.58643e-271	Rian	EC/EndoC	Two-sided Wilcoxon test	0.25	25
5.9777e-170	0.687899	0.917	0.713	1.39107e-165	Pdia6	EC/EndoC	Two-sided Wilcoxon test	0.25	25
0	0.687876	0.583	0.102	0	Tjp2	EC/EndoC	Two-sided Wilcoxon test	0.25	25
3.572e-296	0.687605	0.73	0.274	8.31239e-292	Rap1gds1	EC/EndoC	Two-sided Wilcoxon test	0.25	25
6.88307e-196	0.68609	0.894	0.653	1.60176e-191	Clta	EC/EndoC	Two-sided Wilcoxon test	0.25	25
0	0.685215	0.569	0.059	0	Tgfbr2	EC/EndoC	Two-sided Wilcoxon test	0.25	25
0	0.684864	0.492	0.118	0	2610307P16Rik	EC/EndoC	Two-sided Wilcoxon test	0.25	25
0	0.68328	0.742	0.276	0	Coro1c	EC/EndoC	Two-sided Wilcoxon test	0.25	25
0	0.682195	0.686	0.209	0	Yes1	EC/EndoC	Two-sided Wilcoxon test	0.25	25
0	0.680732	0.504	0.056	0	Cped1	EC/EndoC	Two-sided Wilcoxon test	0.25	25
0	0.677813	0.556	0.077	0	Snrk	EC/EndoC	Two-sided Wilcoxon test	0.25	25
1.04544e-259	0.677663	0.775	0.364	2.43283e-255	Rab11a	EC/EndoC	Two-sided Wilcoxon test	0.25	25
6.23616e-261	0.677345	0.833	0.369	1.45122e-256	Tnrc6a	EC/EndoC	Two-sided Wilcoxon test	0.25	25
5.81131e-220	0.677193	0.894	0.46	1.35235e-215	Ttc3	EC/EndoC	Two-sided Wilcoxon test	0.25	25
1.77198e-241	0.67697	0.76	0.33	4.12357e-237	Arhgef12	EC/EndoC	Two-sided Wilcoxon test	0.25	25
0	0.676609	0.748	0.278	0	Trim24	EC/EndoC	Two-sided Wilcoxon test	0.25	25
8.61588e-299	0.676506	0.781	0.297	2.005e-294	Fndc3a	EC/EndoC	Two-sided Wilcoxon test	0.25	25
1.78252e-189	0.676494	0.912	0.547	4.1481e-185	Atrx	EC/EndoC	Two-sided Wilcoxon test	0.25	25
7.17969e-176	0.676098	0.799	0.459	1.67079e-171	Itm2b	EC/EndoC	Two-sided Wilcoxon test	0.25	25
0	0.674706	0.627	0.163	0	Arhgdib	EC/EndoC	Two-sided Wilcoxon test	0.25	25
0	0.674009	0.614	0.106	0	Palm	EC/EndoC	Two-sided Wilcoxon test	0.25	25
2.28445e-239	0.673606	0.715	0.268	5.31615e-235	Arhgap6	EC/EndoC	Two-sided Wilcoxon test	0.25	25
0	0.67353	0.599	0.125	0	Rap2a	EC/EndoC	Two-sided Wilcoxon test	0.25	25
1.70095e-202	0.673062	0.438	0.138	3.95828e-198	Kitl	EC/EndoC	Two-sided Wilcoxon test	0.25	25
1.11173e-195	0.670892	0.272	0.063	2.5871e-191	Hs6st3	EC/EndoC	Two-sided Wilcoxon test	0.25	25
3.11243e-281	0.668273	0.728	0.259	7.24294e-277	Akt3	EC/EndoC	Two-sided Wilcoxon test	0.25	25
0	0.667009	0.573	0.157	0	Cavin3	EC/EndoC	Two-sided Wilcoxon test	0.25	25
8.43058e-194	0.665387	0.904	0.495	1.96188e-189	Kansl1	EC/EndoC	Two-sided Wilcoxon test	0.25	25
0	0.665296	0.631	0.145	0	Pxdn	EC/EndoC	Two-sided Wilcoxon test	0.25	25
0	0.664908	0.659	0.119	0	Emilin1	EC/EndoC	Two-sided Wilcoxon test	0.25	25
3.8997e-227	0.664671	0.788	0.384	9.07499e-223	Sms	EC/EndoC	Two-sided Wilcoxon test	0.25	25
0	0.664659	0.542	0.118	0	Gap43	EC/EndoC	Two-sided Wilcoxon test	0.25	25
0	0.664485	0.698	0.215	0	Zfp608	EC/EndoC	Two-sided Wilcoxon test	0.25	25
0	0.662996	0.657	0.177	0	Apbb2	EC/EndoC	Two-sided Wilcoxon test	0.25	25
0	0.661085	0.518	0.114	0	Itga1	EC/EndoC	Two-sided Wilcoxon test	0.25	25
0	0.660567	0.653	0.167	0	Itga6	EC/EndoC	Two-sided Wilcoxon test	0.25	25
6.68094e-282	0.659378	0.826	0.34	1.55472e-277	Eif4g3	EC/EndoC	Two-sided Wilcoxon test	0.25	25
2.59235e-193	0.657679	0.842	0.424	6.03266e-189	Ascc3	EC/EndoC	Two-sided Wilcoxon test	0.25	25
0	0.657435	0.577	0.119	0	Nfkb1	EC/EndoC	Two-sided Wilcoxon test	0.25	25
5.24036e-213	0.654168	0.844	0.44	1.21948e-208	Pak2	EC/EndoC	Two-sided Wilcoxon test	0.25	25
0	0.653929	0.657	0.152	0	Il11ra1	EC/EndoC	Two-sided Wilcoxon test	0.25	25
1.18465e-284	0.652544	0.811	0.306	2.75679e-280	Rbfox2	EC/EndoC	Two-sided Wilcoxon test	0.25	25
1.17426e-244	0.651768	0.806	0.354	2.73261e-240	Ccny	EC/EndoC	Two-sided Wilcoxon test	0.25	25
0	0.651159	0.736	0.217	0	Ppfibp1	EC/EndoC	Two-sided Wilcoxon test	0.25	25
0	0.649924	0.68	0.165	0	Phldb2	EC/EndoC	Two-sided Wilcoxon test	0.25	25
5.87343e-179	0.649919	0.801	0.457	1.36681e-174	Npc2	EC/EndoC	Two-sided Wilcoxon test	0.25	25
2.64284e-199	0.649808	0.809	0.401	6.15016e-195	Rock2	EC/EndoC	Two-sided Wilcoxon test	0.25	25
0	0.64977	0.622	0.108	0	Ecm1	EC/EndoC	Two-sided Wilcoxon test	0.25	25
0	0.648737	0.476	0.059	0	Plekhg1	EC/EndoC	Two-sided Wilcoxon test	0.25	25
0	0.648515	0.444	0.02	0	Adgrl4	EC/EndoC	Two-sided Wilcoxon test	0.25	25
1.01577e-123	0.6482	0.989	0.975	2.36381e-119	Actg1	EC/EndoC	Two-sided Wilcoxon test	0.25	25
0	0.64703	0.616	0.142	0	Trerf1	EC/EndoC	Two-sided Wilcoxon test	0.25	25
0	0.645389	0.502	0.023	0	Adgrf5	EC/EndoC	Two-sided Wilcoxon test	0.25	25
6.01395e-237	0.645228	0.68	0.268	1.39951e-232	Mbd5	EC/EndoC	Two-sided Wilcoxon test	0.25	25
0	0.644182	0.553	0.063	0	S1pr1	EC/EndoC	Two-sided Wilcoxon test	0.25	25
2.20829e-81	0.643884	0.995	0.972	5.1389e-77	Tmsb4x	EC/EndoC	Two-sided Wilcoxon test	0.25	25
2.50824e-180	0.643709	0.904	0.514	5.83692e-176	Macf1	EC/EndoC	Two-sided Wilcoxon test	0.25	25
4.42651e-289	0.640898	0.692	0.252	1.03009e-284	Ppic	EC/EndoC	Two-sided Wilcoxon test	0.25	25
0	0.64084	0.629	0.128	0	Efnb2	EC/EndoC	Two-sided Wilcoxon test	0.25	25
0	0.640178	0.594	0.119	0	Cdc42bpb	EC/EndoC	Two-sided Wilcoxon test	0.25	25
4.78892e-134	0.639467	0.958	0.888	1.11443e-129	Serf2	EC/EndoC	Two-sided Wilcoxon test	0.25	25
0	0.639187	0.638	0.138	0	Tspan9	EC/EndoC	Two-sided Wilcoxon test	0.25	25
0	0.638681	0.7	0.177	0	Litaf	EC/EndoC	Two-sided Wilcoxon test	0.25	25
4.5723e-234	0.636998	0.719	0.303	1.06402e-229	Pdlim1	EC/EndoC	Two-sided Wilcoxon test	0.25	25
1.88912e-257	0.636162	0.742	0.282	4.39618e-253	Sox4	EC/EndoC	Two-sided Wilcoxon test	0.25	25
1.06385e-216	0.634827	0.812	0.378	2.47569e-212	Smg6	EC/EndoC	Two-sided Wilcoxon test	0.25	25
0	0.633546	0.352	0.044	0	Tm4sf1	EC/EndoC	Two-sided Wilcoxon test	0.25	25
2.80171e-239	0.632619	0.703	0.279	6.51987e-235	Zfp407	EC/EndoC	Two-sided Wilcoxon test	0.25	25
0	0.6325	0.452	0.075	0	Arhgap18	EC/EndoC	Two-sided Wilcoxon test	0.25	25
4.70659e-266	0.632258	0.793	0.33	1.09527e-261	Fbxo11	EC/EndoC	Two-sided Wilcoxon test	0.25	25
0	0.631274	0.602	0.158	0	Klf12	EC/EndoC	Two-sided Wilcoxon test	0.25	25
0	0.630882	0.507	0.1	0	Nhsl1	EC/EndoC	Two-sided Wilcoxon test	0.25	25
2.46884e-248	0.63077	0.774	0.324	5.74523e-244	Cdk13	EC/EndoC	Two-sided Wilcoxon test	0.25	25
0	0.630598	0.726	0.257	0	Smurf2	EC/EndoC	Two-sided Wilcoxon test	0.25	25
0	0.629031	0.486	0.038	0	Plxnc1	EC/EndoC	Two-sided Wilcoxon test	0.25	25
0	0.627738	0.455	0.067	0	Lrig1	EC/EndoC	Two-sided Wilcoxon test	0.25	25
1.24783e-162	0.626079	0.782	0.422	2.90383e-158	Cd63	EC/EndoC	Two-sided Wilcoxon test	0.25	25
4.12388e-223	0.625667	0.807	0.387	9.59668e-219	Tln1	EC/EndoC	Two-sided Wilcoxon test	0.25	25
0	0.624554	0.528	0.085	0	Heg1	EC/EndoC	Two-sided Wilcoxon test	0.25	25
3.26509e-132	0.624168	0.864	0.672	7.59818e-128	Sec61b	EC/EndoC	Two-sided Wilcoxon test	0.25	25
7.14526e-164	0.623057	0.888	0.509	1.66277e-159	Clic4	EC/EndoC	Two-sided Wilcoxon test	0.25	25
0	0.622347	0.652	0.218	0	Aak1	EC/EndoC	Two-sided Wilcoxon test	0.25	25
1.92756e-232	0.621858	0.453	0.132	4.48563e-228	Pcsk5	EC/EndoC	Two-sided Wilcoxon test	0.25	25
3.3932e-242	0.621741	0.517	0.161	7.89632e-238	Spon1	EC/EndoC	Two-sided Wilcoxon test	0.25	25
9.10876e-229	0.62115	0.817	0.384	2.1197e-224	Mapk1ip1l	EC/EndoC	Two-sided Wilcoxon test	0.25	25
0	0.620694	0.592	0.141	0	Col5a2	EC/EndoC	Two-sided Wilcoxon test	0.25	25
5.74277e-199	0.619563	0.604	0.242	1.3364e-194	Wwox	EC/EndoC	Two-sided Wilcoxon test	0.25	25
4.2788e-299	0.619442	0.759	0.268	9.95719e-295	Fnbp1l	EC/EndoC	Two-sided Wilcoxon test	0.25	25
3.76992e-137	0.618363	0.813	0.488	8.77299e-133	Id3	EC/EndoC	Two-sided Wilcoxon test	0.25	25
8.53384e-271	0.616788	0.734	0.27	1.98591e-266	Atrnl1	EC/EndoC	Two-sided Wilcoxon test	0.25	25
8.81571e-273	0.61579	0.477	0.14	2.0515e-268	Slc22a23	EC/EndoC	Two-sided Wilcoxon test	0.25	25
0	0.615193	0.689	0.223	0	Arl5b	EC/EndoC	Two-sided Wilcoxon test	0.25	25
2.24251e-143	0.614512	0.961	0.871	5.21855e-139	Hspa5	EC/EndoC	Two-sided Wilcoxon test	0.25	25
0	0.612928	0.441	0.105	0	Lrmda	EC/EndoC	Two-sided Wilcoxon test	0.25	25
2.30658e-199	0.612784	0.808	0.418	5.36765e-195	Sept11	EC/EndoC	Two-sided Wilcoxon test	0.25	25
3.7001e-143	0.61046	0.984	0.965	8.61049e-139	H3f3b	EC/EndoC	Two-sided Wilcoxon test	0.25	25
0	0.610371	0.462	0.042	0	Dysf	EC/EndoC	Two-sided Wilcoxon test	0.25	25
1.16061e-200	0.60993	0.845	0.406	2.70086e-196	Zfand3	EC/EndoC	Two-sided Wilcoxon test	0.25	25
1.69102e-226	0.609448	0.788	0.348	3.93517e-222	Tle4	EC/EndoC	Two-sided Wilcoxon test	0.25	25
1.42653e-242	0.60904	0.737	0.307	3.31967e-238	Gls	EC/EndoC	Two-sided Wilcoxon test	0.25	25
0	0.608837	0.548	0.07	0	Rasa3	EC/EndoC	Two-sided Wilcoxon test	0.25	25
1.12909e-144	0.6086	0.891	0.521	2.62751e-140	Magi1	EC/EndoC	Two-sided Wilcoxon test	0.25	25
2.77136e-181	0.608122	0.86	0.519	6.44923e-177	Dnajb6	EC/EndoC	Two-sided Wilcoxon test	0.25	25
6.75331e-249	0.606133	0.785	0.337	1.57156e-244	Sec63	EC/EndoC	Two-sided Wilcoxon test	0.25	25
0	0.605827	0.698	0.229	0	Gcc2	EC/EndoC	Two-sided Wilcoxon test	0.25	25
1.15451e-208	0.605541	0.774	0.37	2.68666e-204	Dnajc3	EC/EndoC	Two-sided Wilcoxon test	0.25	25
0	0.605433	0.654	0.19	0	Abhd17b	EC/EndoC	Two-sided Wilcoxon test	0.25	25
0	0.605389	0.594	0.146	0	Gulp1	EC/EndoC	Two-sided Wilcoxon test	0.25	25
0	0.605058	0.508	0.13	0	Gm15614	EC/EndoC	Two-sided Wilcoxon test	0.25	25
1.35082e-224	0.604105	0.705	0.288	3.14348e-220	Maml3	EC/EndoC	Two-sided Wilcoxon test	0.25	25
2.17766e-257	0.602544	0.746	0.303	5.06764e-253	Peli1	EC/EndoC	Two-sided Wilcoxon test	0.25	25
4.57993e-284	0.601956	0.784	0.308	1.0658e-279	Copa	EC/EndoC	Two-sided Wilcoxon test	0.25	25
6.95928e-290	0.600795	0.703	0.235	1.61949e-285	Large1	EC/EndoC	Two-sided Wilcoxon test	0.25	25
1.50859e-282	0.598852	0.709	0.264	3.51064e-278	Ralb	EC/EndoC	Two-sided Wilcoxon test	0.25	25
1.81178e-271	0.598765	0.792	0.315	4.2162e-267	Glg1	EC/EndoC	Two-sided Wilcoxon test	0.25	25
6.24595e-283	0.598478	0.769	0.31	1.4535e-278	Cd2ap	EC/EndoC	Two-sided Wilcoxon test	0.25	25
6.0812e-174	0.598467	0.855	0.555	1.41516e-169	Sh3glb1	EC/EndoC	Two-sided Wilcoxon test	0.25	25
0	0.598362	0.681	0.201	0	Klf7	EC/EndoC	Two-sided Wilcoxon test	0.25	25
2.99883e-268	0.598093	0.747	0.299	6.97859e-264	Mprip	EC/EndoC	Two-sided Wilcoxon test	0.25	25
0	0.597609	0.728	0.263	0	Ptpn1	EC/EndoC	Two-sided Wilcoxon test	0.25	25
0	0.597603	0.5	0.123	0	Fry	EC/EndoC	Two-sided Wilcoxon test	0.25	25
3.38604e-168	0.597155	0.911	0.604	7.87966e-164	Prrc2c	EC/EndoC	Two-sided Wilcoxon test	0.25	25
0	0.595602	0.563	0.065	0	Grasp	EC/EndoC	Two-sided Wilcoxon test	0.25	25
8.66276e-205	0.59515	0.761	0.33	2.01591e-200	Fstl1	EC/EndoC	Two-sided Wilcoxon test	0.25	25
1.32533e-287	0.594541	0.74	0.27	3.08417e-283	Wdfy3	EC/EndoC	Two-sided Wilcoxon test	0.25	25
1.54472e-210	0.594094	0.721	0.313	3.59473e-206	Lcorl	EC/EndoC	Two-sided Wilcoxon test	0.25	25
0	0.593714	0.633	0.174	0	Cask	EC/EndoC	Two-sided Wilcoxon test	0.25	25
1.3711e-217	0.592656	0.763	0.334	3.1907e-213	Dyrk1a	EC/EndoC	Two-sided Wilcoxon test	0.25	25
1.78261e-227	0.589432	0.709	0.294	4.14831e-223	Fnip1	EC/EndoC	Two-sided Wilcoxon test	0.25	25
2.35949e-228	0.588078	0.743	0.321	5.49077e-224	Fcho2	EC/EndoC	Two-sided Wilcoxon test	0.25	25
3.56161e-170	0.586531	0.87	0.477	8.28822e-166	Wac	EC/EndoC	Two-sided Wilcoxon test	0.25	25
1.39819e-196	0.586282	0.761	0.356	3.25373e-192	Anxa5	EC/EndoC	Two-sided Wilcoxon test	0.25	25
7.87407e-181	0.585137	0.821	0.401	1.83237e-176	Tanc2	EC/EndoC	Two-sided Wilcoxon test	0.25	25
8.93207e-148	0.584613	0.886	0.501	2.07858e-143	Msi2	EC/EndoC	Two-sided Wilcoxon test	0.25	25
0	0.584184	0.554	0.089	0	Ets2	EC/EndoC	Two-sided Wilcoxon test	0.25	25
1.06974e-135	0.583864	0.789	0.532	2.48939e-131	Krtcap2	EC/EndoC	Two-sided Wilcoxon test	0.25	25
1.28194e-85	0.582053	0.778	0.514	2.9832e-81	Fos	EC/EndoC	Two-sided Wilcoxon test	0.25	25
0	0.580404	0.55	0.135	0	Fmnl2	EC/EndoC	Two-sided Wilcoxon test	0.25	25
2.22445e-225	0.580365	0.798	0.349	5.17653e-221	Crebbp	EC/EndoC	Two-sided Wilcoxon test	0.25	25
1.58294e-222	0.580216	0.803	0.358	3.68365e-218	Mycbp2	EC/EndoC	Two-sided Wilcoxon test	0.25	25
0	0.57934	0.556	0.052	0	Abi3	EC/EndoC	Two-sided Wilcoxon test	0.25	25
0	0.57806	0.479	0.052	0	Fxyd5	EC/EndoC	Two-sided Wilcoxon test	0.25	25
2.65483e-251	0.577865	0.742	0.322	6.17804e-247	Tmod3	EC/EndoC	Two-sided Wilcoxon test	0.25	25
0	0.577802	0.468	0.063	0	Ophn1	EC/EndoC	Two-sided Wilcoxon test	0.25	25
5.01413e-138	0.577663	0.888	0.705	1.16684e-133	Ppib	EC/EndoC	Two-sided Wilcoxon test	0.25	25
0	0.576837	0.464	0.062	0	Sgk1	EC/EndoC	Two-sided Wilcoxon test	0.25	25
0	0.576346	0.703	0.213	0	Syne2	EC/EndoC	Two-sided Wilcoxon test	0.25	25
0	0.576114	0.679	0.231	0	Slk	EC/EndoC	Two-sided Wilcoxon test	0.25	25
0	0.575378	0.631	0.154	0	Mmp14	EC/EndoC	Two-sided Wilcoxon test	0.25	25
0	0.575093	0.429	0.041	0	Inpp4b	EC/EndoC	Two-sided Wilcoxon test	0.25	25
0	0.57502	0.507	0.035	0	Arap3	EC/EndoC	Two-sided Wilcoxon test	0.25	25
1.47417e-241	0.573963	0.694	0.282	3.43055e-237	Klf3	EC/EndoC	Two-sided Wilcoxon test	0.25	25
1.52256e-155	0.573801	0.867	0.537	3.54315e-151	Ywhaz	EC/EndoC	Two-sided Wilcoxon test	0.25	25
1.92452e-93	0.573761	0.988	0.949	4.47854e-89	mt-Nd4	EC/EndoC	Two-sided Wilcoxon test	0.25	25
2.22445e-119	0.573584	0.797	0.552	5.17653e-115	Selenoh	EC/EndoC	Two-sided Wilcoxon test	0.25	25
4.59367e-218	0.573025	0.788	0.365	1.06899e-213	Nsd3	EC/EndoC	Two-sided Wilcoxon test	0.25	25
1.14202e-281	0.571799	0.626	0.21	2.6576e-277	Tspan6	EC/EndoC	Two-sided Wilcoxon test	0.25	25
0	0.571696	0.585	0.153	0	Arhgef7	EC/EndoC	Two-sided Wilcoxon test	0.25	25
0	0.571181	0.71	0.21	0	Soat1	EC/EndoC	Two-sided Wilcoxon test	0.25	25
6.99833e-174	0.571092	0.734	0.359	1.62858e-169	S100a11	EC/EndoC	Two-sided Wilcoxon test	0.25	25
2.67552e-111	0.569219	1	0.999	6.2262e-107	Malat1	EC/EndoC	Two-sided Wilcoxon test	0.25	25
0	0.568524	0.471	0.072	0	Nedd9	EC/EndoC	Two-sided Wilcoxon test	0.25	25
2.94114e-285	0.568369	0.657	0.231	6.84432e-281	Piezo1	EC/EndoC	Two-sided Wilcoxon test	0.25	25
7.55852e-175	0.568309	0.795	0.405	1.75894e-170	Tpm4	EC/EndoC	Two-sided Wilcoxon test	0.25	25
2.19396e-234	0.568253	0.775	0.352	5.10556e-230	Sdcbp	EC/EndoC	Two-sided Wilcoxon test	0.25	25
8.34904e-251	0.567914	0.847	0.336	1.94291e-246	Tead1	EC/EndoC	Two-sided Wilcoxon test	0.25	25
0	0.56791	0.642	0.167	0	Mapre2	EC/EndoC	Two-sided Wilcoxon test	0.25	25
0	0.567782	0.584	0.12	0	Ccdc80	EC/EndoC	Two-sided Wilcoxon test	0.25	25
2.30105e-210	0.56762	0.796	0.379	5.35478e-206	B230219D22Rik	EC/EndoC	Two-sided Wilcoxon test	0.25	25
2.50153e-153	0.567336	0.86	0.558	5.8213e-149	Sumo1	EC/EndoC	Two-sided Wilcoxon test	0.25	25
1.14465e-152	0.567238	0.901	0.676	2.66371e-148	Arpc2	EC/EndoC	Two-sided Wilcoxon test	0.25	25
0	0.567177	0.471	0.043	0	Myzap	EC/EndoC	Two-sided Wilcoxon test	0.25	25
0	0.566208	0.639	0.169	0	Snx9	EC/EndoC	Two-sided Wilcoxon test	0.25	25
2.88055e-217	0.566099	0.652	0.266	6.70332e-213	Mthfd1l	EC/EndoC	Two-sided Wilcoxon test	0.25	25
6.45258e-281	0.565902	0.676	0.227	1.50158e-276	Dip2c	EC/EndoC	Two-sided Wilcoxon test	0.25	25
1.39353e-191	0.565766	0.752	0.372	3.24288e-187	Pnrc1	EC/EndoC	Two-sided Wilcoxon test	0.25	25
9.9278e-205	0.565763	0.829	0.403	2.3103e-200	Thoc2	EC/EndoC	Two-sided Wilcoxon test	0.25	25
1.3204e-243	0.564737	0.748	0.32	3.0727e-239	Glud1	EC/EndoC	Two-sided Wilcoxon test	0.25	25
2.10223e-127	0.564521	0.831	0.603	4.89209e-123	Pomp	EC/EndoC	Two-sided Wilcoxon test	0.25	25
2.78964e-165	0.563657	0.905	0.623	6.49177e-161	Gnb1	EC/EndoC	Two-sided Wilcoxon test	0.25	25
1.22e-98	0.563272	0.936	0.885	2.83905e-94	Pfn1	EC/EndoC	Two-sided Wilcoxon test	0.25	25
0	0.56321	0.672	0.192	0	Tanc1	EC/EndoC	Two-sided Wilcoxon test	0.25	25
0	0.563159	0.629	0.188	0	Ano6	EC/EndoC	Two-sided Wilcoxon test	0.25	25
8.92602e-104	0.56279	0.992	0.949	2.07717e-99	mt-Nd1	EC/EndoC	Two-sided Wilcoxon test	0.25	25
3.6001e-148	0.562787	0.88	0.514	8.37778e-144	Srek1	EC/EndoC	Two-sided Wilcoxon test	0.25	25
1.31094e-217	0.561606	0.713	0.283	3.05069e-213	Zbtb20	EC/EndoC	Two-sided Wilcoxon test	0.25	25
0	0.560804	0.49	0.076	0	Man1c1	EC/EndoC	Two-sided Wilcoxon test	0.25	25
0	0.560374	0.649	0.201	0	Phactr2	EC/EndoC	Two-sided Wilcoxon test	0.25	25
4.17217e-94	0.560291	0.942	0.875	9.70906e-90	Dynll1	EC/EndoC	Two-sided Wilcoxon test	0.25	25
0	0.559618	0.541	0.098	0	Lyn	EC/EndoC	Two-sided Wilcoxon test	0.25	25
3.44784e-170	0.558753	0.722	0.347	8.02346e-166	Tle5	EC/EndoC	Two-sided Wilcoxon test	0.25	25
3.18805e-188	0.557413	0.661	0.285	7.41891e-184	Rfx3	EC/EndoC	Two-sided Wilcoxon test	0.25	25
2.97884e-276	0.55714	0.726	0.261	6.93205e-272	Nxn	EC/EndoC	Two-sided Wilcoxon test	0.25	25
2.50548e-292	0.556384	0.695	0.252	5.83051e-288	Arpc1b	EC/EndoC	Two-sided Wilcoxon test	0.25	25
1.89362e-263	0.554084	0.692	0.251	4.40664e-259	Map4	EC/EndoC	Two-sided Wilcoxon test	0.25	25
0	0.554047	0.615	0.156	0	Flnb	EC/EndoC	Two-sided Wilcoxon test	0.25	25
2.01437e-232	0.553707	0.773	0.331	4.68765e-228	Nckap1	EC/EndoC	Two-sided Wilcoxon test	0.25	25
9.65015e-159	0.553355	0.824	0.487	2.24569e-154	Hnrnpa0	EC/EndoC	Two-sided Wilcoxon test	0.25	25
0	0.552989	0.467	0.08	0	Tbc1d9	EC/EndoC	Two-sided Wilcoxon test	0.25	25
4.95892e-124	0.552878	0.828	0.611	1.15399e-119	Gnb2	EC/EndoC	Two-sided Wilcoxon test	0.25	25
1.14491e-158	0.551279	0.95	0.857	2.66431e-154	Gnas	EC/EndoC	Two-sided Wilcoxon test	0.25	25
5.11113e-275	0.55006	0.648	0.229	1.18941e-270	Abl2	EC/EndoC	Two-sided Wilcoxon test	0.25	25
1.42857e-266	0.549705	0.603	0.202	3.32443e-262	Tmem176b	EC/EndoC	Two-sided Wilcoxon test	0.25	25
1.40173e-293	0.549577	0.713	0.237	3.26197e-289	Camk2d	EC/EndoC	Two-sided Wilcoxon test	0.25	25
0	0.549318	0.703	0.232	0	Cyfip1	EC/EndoC	Two-sided Wilcoxon test	0.25	25
0	0.548539	0.485	0.041	0	Mmrn2	EC/EndoC	Two-sided Wilcoxon test	0.25	25
7.37168e-254	0.548522	0.582	0.19	1.71546e-249	Cers6	EC/EndoC	Two-sided Wilcoxon test	0.25	25
1.30826e-125	0.548021	0.882	0.699	3.04446e-121	Sfr1	EC/EndoC	Two-sided Wilcoxon test	0.25	25
1.11361e-280	0.547518	0.655	0.214	2.59148e-276	Ube2e2	EC/EndoC	Two-sided Wilcoxon test	0.25	25
5.3664e-275	0.547342	0.658	0.233	1.24881e-270	Numb	EC/EndoC	Two-sided Wilcoxon test	0.25	25
5.74165e-196	0.546963	0.861	0.411	1.33614e-191	Meis2	EC/EndoC	Two-sided Wilcoxon test	0.25	25
0	0.546893	0.284	0.016	0	Galnt18	EC/EndoC	Two-sided Wilcoxon test	0.25	25
0	0.54623	0.592	0.16	0	Tiam1	EC/EndoC	Two-sided Wilcoxon test	0.25	25
1.1074e-236	0.545715	0.728	0.3	2.57703e-232	Ythdf3	EC/EndoC	Two-sided Wilcoxon test	0.25	25
0	0.54554	0.496	0.097	0	Vegfc	EC/EndoC	Two-sided Wilcoxon test	0.25	25
3.29563e-232	0.544999	0.726	0.304	7.66926e-228	Ap3b1	EC/EndoC	Two-sided Wilcoxon test	0.25	25
0	0.544816	0.679	0.227	0	Znrf1	EC/EndoC	Two-sided Wilcoxon test	0.25	25
0	0.542738	0.505	0.048	0	Smagp	EC/EndoC	Two-sided Wilcoxon test	0.25	25
0	0.542624	0.619	0.158	0	Yap1	EC/EndoC	Two-sided Wilcoxon test	0.25	25
0	0.542564	0.52	0.102	0	Ttc7b	EC/EndoC	Two-sided Wilcoxon test	0.25	25
1.83341e-293	0.542467	0.646	0.205	4.26654e-289	Creb3l2	EC/EndoC	Two-sided Wilcoxon test	0.25	25
0	0.541304	0.596	0.129	0	Fnbp1	EC/EndoC	Two-sided Wilcoxon test	0.25	25
7.18477e-165	0.539571	0.801	0.448	1.67197e-160	Mcl1	EC/EndoC	Two-sided Wilcoxon test	0.25	25
7.75097e-256	0.5389	0.634	0.225	1.80373e-251	Stat3	EC/EndoC	Two-sided Wilcoxon test	0.25	25
0	0.538657	0.628	0.186	0	Acap2	EC/EndoC	Two-sided Wilcoxon test	0.25	25
3.75908e-265	0.537661	0.709	0.266	8.74777e-261	Prrc1	EC/EndoC	Two-sided Wilcoxon test	0.25	25
0	0.53734	0.469	0.056	0	Cd34	EC/EndoC	Two-sided Wilcoxon test	0.25	25
1.12671e-165	0.536926	0.667	0.297	2.62198e-161	Egr1	EC/EndoC	Two-sided Wilcoxon test	0.25	25
1.25239e-166	0.536444	0.864	0.462	2.91444e-162	Brd4	EC/EndoC	Two-sided Wilcoxon test	0.25	25
6.76034e-181	0.536419	0.797	0.385	1.5732e-176	Ubr5	EC/EndoC	Two-sided Wilcoxon test	0.25	25
8.8195e-273	0.536394	0.567	0.183	2.05239e-268	Sh3pxd2a	EC/EndoC	Two-sided Wilcoxon test	0.25	25
0	0.535801	0.626	0.191	0	Map3k2	EC/EndoC	Two-sided Wilcoxon test	0.25	25
1.62691e-189	0.534968	0.669	0.282	3.78599e-185	5330438D12Rik	EC/EndoC	Two-sided Wilcoxon test	0.25	25
5.0856e-205	0.534664	0.761	0.346	1.18347e-200	Uhrf2	EC/EndoC	Two-sided Wilcoxon test	0.25	25
1.70796e-193	0.534567	0.531	0.189	3.9746e-189	Cdh11	EC/EndoC	Two-sided Wilcoxon test	0.25	25
2.30671e-183	0.534501	0.774	0.368	5.36794e-179	Ube2g1	EC/EndoC	Two-sided Wilcoxon test	0.25	25
2.93423e-135	0.534441	0.519	0.216	6.82825e-131	Ncam1	EC/EndoC	Two-sided Wilcoxon test	0.25	25
2.88598e-149	0.53444	0.87	0.49	6.71596e-145	Usp34	EC/EndoC	Two-sided Wilcoxon test	0.25	25
8.38166e-136	0.534411	0.832	0.57	1.9505e-131	Akr1a1	EC/EndoC	Two-sided Wilcoxon test	0.25	25
3.03513e-152	0.53431	0.844	0.474	7.06305e-148	Zfand5	EC/EndoC	Two-sided Wilcoxon test	0.25	25
1.11019e-190	0.534224	0.757	0.374	2.58352e-186	Prpf38b	EC/EndoC	Two-sided Wilcoxon test	0.25	25
0	0.53239	0.467	0.087	0	Zfp423	EC/EndoC	Two-sided Wilcoxon test	0.25	25
2.42628e-200	0.531643	0.795	0.366	5.6462e-196	Setd5	EC/EndoC	Two-sided Wilcoxon test	0.25	25
0	0.5316	0.619	0.168	0	Map4k3	EC/EndoC	Two-sided Wilcoxon test	0.25	25
5.23057e-248	0.53153	0.615	0.216	1.21721e-243	Exoc6b	EC/EndoC	Two-sided Wilcoxon test	0.25	25
1.31144e-139	0.530386	0.819	0.447	3.05186e-135	Psme4	EC/EndoC	Two-sided Wilcoxon test	0.25	25
1.38645e-252	0.530364	0.678	0.256	3.2264e-248	Rptor	EC/EndoC	Two-sided Wilcoxon test	0.25	25
8.68935e-180	0.530193	0.834	0.424	2.0221e-175	Kcmf1	EC/EndoC	Two-sided Wilcoxon test	0.25	25
0	0.52924	0.436	0.028	0	Tnfaip2	EC/EndoC	Two-sided Wilcoxon test	0.25	25
1.86779e-148	0.528673	0.878	0.522	4.34652e-144	Ythdc1	EC/EndoC	Two-sided Wilcoxon test	0.25	25
1.54703e-160	0.528525	0.857	0.453	3.60009e-156	Nipbl	EC/EndoC	Two-sided Wilcoxon test	0.25	25
0	0.526722	0.352	0.016	0	Vwf	EC/EndoC	Two-sided Wilcoxon test	0.25	25
0	0.526249	0.566	0.118	0	Adam19	EC/EndoC	Two-sided Wilcoxon test	0.25	25
6.70801e-163	0.525481	0.822	0.41	1.56102e-158	Usp9x	EC/EndoC	Two-sided Wilcoxon test	0.25	25
1.09079e-187	0.525032	0.792	0.376	2.53838e-183	Cnot1	EC/EndoC	Two-sided Wilcoxon test	0.25	25
1.65262e-269	0.524689	0.599	0.196	3.84581e-265	Sec24a	EC/EndoC	Two-sided Wilcoxon test	0.25	25
0	0.524359	0.5	0.106	0	Smurf1	EC/EndoC	Two-sided Wilcoxon test	0.25	25
2.36798e-140	0.524173	0.861	0.495	5.51053e-136	Rock1	EC/EndoC	Two-sided Wilcoxon test	0.25	25
0	0.523435	0.488	0.062	0	Acer2	EC/EndoC	Two-sided Wilcoxon test	0.25	25
7.81299e-156	0.523374	0.93	0.744	1.81816e-151	Cdc42	EC/EndoC	Two-sided Wilcoxon test	0.25	25
4.71957e-156	0.522646	0.847	0.531	1.09829e-151	Rac1	EC/EndoC	Two-sided Wilcoxon test	0.25	25
8.13697e-190	0.522547	0.813	0.374	1.89355e-185	Ptbp2	EC/EndoC	Two-sided Wilcoxon test	0.25	25
3.96265e-209	0.522446	0.772	0.351	9.22148e-205	Acbd3	EC/EndoC	Two-sided Wilcoxon test	0.25	25
7.10901e-120	0.52219	0.905	0.751	1.65434e-115	Snrpd1	EC/EndoC	Two-sided Wilcoxon test	0.25	25
2.5977e-286	0.52211	0.586	0.186	6.04512e-282	Oxr1	EC/EndoC	Two-sided Wilcoxon test	0.25	25
2.96953e-98	0.521501	0.944	0.846	6.91039e-94	Mdk	EC/EndoC	Two-sided Wilcoxon test	0.25	25
0	0.521337	0.514	0.097	0	Lama4	EC/EndoC	Two-sided Wilcoxon test	0.25	25
1.05997e-195	0.520264	0.788	0.359	2.46665e-191	Ctnnb1	EC/EndoC	Two-sided Wilcoxon test	0.25	25
0	0.519156	0.401	0.038	0	Itpkb	EC/EndoC	Two-sided Wilcoxon test	0.25	25
8.59996e-164	0.517602	0.837	0.433	2.0013e-159	Tnpo1	EC/EndoC	Two-sided Wilcoxon test	0.25	25
1.30002e-201	0.517438	0.813	0.387	3.02529e-197	Smarca4	EC/EndoC	Two-sided Wilcoxon test	0.25	25
4.34242e-211	0.516856	0.762	0.334	1.01053e-206	Pdcd4	EC/EndoC	Two-sided Wilcoxon test	0.25	25
2.60777e-157	0.516781	0.827	0.449	6.06854e-153	H2afy	EC/EndoC	Two-sided Wilcoxon test	0.25	25
1.62333e-195	0.516587	0.801	0.38	3.77766e-191	Rab5a	EC/EndoC	Two-sided Wilcoxon test	0.25	25
3.06254e-199	0.515589	0.625	0.258	7.12684e-195	Dusp1	EC/EndoC	Two-sided Wilcoxon test	0.25	25
7.32069e-134	0.515318	0.832	0.568	1.7036e-129	Ywhab	EC/EndoC	Two-sided Wilcoxon test	0.25	25
1.83788e-204	0.5152	0.713	0.31	4.27694e-200	Pan3	EC/EndoC	Two-sided Wilcoxon test	0.25	25
7.61116e-196	0.513953	0.486	0.163	1.77119e-191	Filip1	EC/EndoC	Two-sided Wilcoxon test	0.25	25
2.14139e-92	0.513183	0.857	0.646	4.98323e-88	Fkbp1a	EC/EndoC	Two-sided Wilcoxon test	0.25	25
6.92873e-261	0.512752	0.669	0.246	1.61239e-256	Rasa1	EC/EndoC	Two-sided Wilcoxon test	0.25	25
0	0.512628	0.416	0.022	0	Car8	EC/EndoC	Two-sided Wilcoxon test	0.25	25
2.26463e-183	0.512429	0.82	0.394	5.27003e-179	Zfp292	EC/EndoC	Two-sided Wilcoxon test	0.25	25
1.95871e-244	0.512004	0.725	0.293	4.55812e-240	Shoc2	EC/EndoC	Two-sided Wilcoxon test	0.25	25
0	0.510897	0.374	0.059	0	St6gal1	EC/EndoC	Two-sided Wilcoxon test	0.25	25
5.15405e-306	0.510669	0.654	0.214	1.1994e-301	Iqgap1	EC/EndoC	Two-sided Wilcoxon test	0.25	25
3.61436e-257	0.510282	0.692	0.262	8.41098e-253	Helz	EC/EndoC	Two-sided Wilcoxon test	0.25	25
0	0.510173	0.556	0.094	0	Rgs3	EC/EndoC	Two-sided Wilcoxon test	0.25	25
1.71448e-242	0.510126	0.706	0.272	3.98977e-238	Slc4a7	EC/EndoC	Two-sided Wilcoxon test	0.25	25
0	0.509691	0.398	0.076	0	Col26a1	EC/EndoC	Two-sided Wilcoxon test	0.25	25
3.9059e-225	0.508555	0.774	0.333	9.08942e-221	Zfp326	EC/EndoC	Two-sided Wilcoxon test	0.25	25
4.97898e-275	0.507335	0.615	0.208	1.15866e-270	Uvrag	EC/EndoC	Two-sided Wilcoxon test	0.25	25
1.76283e-284	0.507083	0.645	0.219	4.10227e-280	Cep170	EC/EndoC	Two-sided Wilcoxon test	0.25	25
7.05755e-163	0.504551	0.811	0.432	1.64236e-158	Tm9sf3	EC/EndoC	Two-sided Wilcoxon test	0.25	25
1.11175e-134	0.504448	0.855	0.531	2.58716e-130	Hdlbp	EC/EndoC	Two-sided Wilcoxon test	0.25	25
2.79621e-268	0.504427	0.728	0.263	6.50706e-264	Kif1b	EC/EndoC	Two-sided Wilcoxon test	0.25	25
7.24626e-215	0.503674	0.416	0.123	1.68628e-210	Sema6a	EC/EndoC	Two-sided Wilcoxon test	0.25	25
2.74668e-200	0.502665	0.703	0.312	6.39179e-196	Rabgef1	EC/EndoC	Two-sided Wilcoxon test	0.25	25
0	0.502558	0.54	0.128	0	Chn1	EC/EndoC	Two-sided Wilcoxon test	0.25	25
5.10812e-181	0.502279	0.738	0.359	1.18871e-176	Srsf9	EC/EndoC	Two-sided Wilcoxon test	0.25	25
0	0.50208	0.492	0.093	0	Ptpn14	EC/EndoC	Two-sided Wilcoxon test	0.25	25
0	0.501767	0.612	0.181	0	Pcnx	EC/EndoC	Two-sided Wilcoxon test	0.25	25
1.94977e-97	0.50152	0.955	0.9	4.53731e-93	Calm1	EC/EndoC	Two-sided Wilcoxon test	0.25	25
8.18336e-264	0.501339	0.645	0.228	1.90435e-259	Pdxdc1	EC/EndoC	Two-sided Wilcoxon test	0.25	25
1.13186e-160	0.501116	0.758	0.409	2.63395e-156	Cmas	EC/EndoC	Two-sided Wilcoxon test	0.25	25
4.54696e-123	0.501113	0.82	0.501	1.05812e-118	Mtch1	EC/EndoC	Two-sided Wilcoxon test	0.25	25
1.26231e-198	0.501074	0.74	0.349	2.93752e-194	Bnip2	EC/EndoC	Two-sided Wilcoxon test	0.25	25
2.50673e-233	0.500762	0.76	0.318	5.8334e-229	Phf14	EC/EndoC	Two-sided Wilcoxon test	0.25	25
0	0.500316	0.394	0.034	0	Pde8a	EC/EndoC	Two-sided Wilcoxon test	0.25	25
9.74454e-238	0.500069	0.709	0.273	2.26765e-233	Ccdc88a	EC/EndoC	Two-sided Wilcoxon test	0.25	25
1.60705e-110	0.499969	0.679	0.363	3.73976e-106	Pola1	EC/EndoC	Two-sided Wilcoxon test	0.25	25
0	0.499286	0.485	0.097	0	Spats2l	EC/EndoC	Two-sided Wilcoxon test	0.25	25
0	0.499056	0.666	0.205	0	Dbn1	EC/EndoC	Two-sided Wilcoxon test	0.25	25
4.24474e-221	0.498554	0.703	0.264	9.87793e-217	Gata6	EC/EndoC	Two-sided Wilcoxon test	0.25	25
0	0.498459	0.619	0.178	0	Tnfaip1	EC/EndoC	Two-sided Wilcoxon test	0.25	25
2.80182e-189	0.49829	0.755	0.343	6.5201e-185	Tnks	EC/EndoC	Two-sided Wilcoxon test	0.25	25
2.52117e-189	0.498241	0.767	0.36	5.86701e-185	Phf20l1	EC/EndoC	Two-sided Wilcoxon test	0.25	25
2.69838e-117	0.497776	0.785	0.445	6.2794e-113	Vmp1	EC/EndoC	Two-sided Wilcoxon test	0.25	25
1.57585e-188	0.497554	0.792	0.355	3.66717e-184	Igf2bp3	EC/EndoC	Two-sided Wilcoxon test	0.25	25
1.03e-166	0.497118	0.87	0.439	2.3969e-162	Zfp644	EC/EndoC	Two-sided Wilcoxon test	0.25	25
6.94472e-197	0.496454	0.705	0.325	1.61611e-192	Wasf2	EC/EndoC	Two-sided Wilcoxon test	0.25	25
5.6454e-175	0.496307	0.702	0.318	1.31374e-170	Zfp36l1	EC/EndoC	Two-sided Wilcoxon test	0.25	25
5.26858e-278	0.496029	0.628	0.219	1.22605e-273	Ccdc85b	EC/EndoC	Two-sided Wilcoxon test	0.25	25
4.98063e-82	0.495912	0.531	0.275	1.15904e-77	Pdlim3	EC/EndoC	Two-sided Wilcoxon test	0.25	25
1.67426e-280	0.495039	0.531	0.162	3.89617e-276	Ern1	EC/EndoC	Two-sided Wilcoxon test	0.25	25
1.12224e-276	0.494648	0.563	0.169	2.61157e-272	Zdbf2	EC/EndoC	Two-sided Wilcoxon test	0.25	25
0	0.49402	0.562	0.144	0	Dennd2a	EC/EndoC	Two-sided Wilcoxon test	0.25	25
1.2522e-252	0.493636	0.663	0.241	2.914e-248	Mib1	EC/EndoC	Two-sided Wilcoxon test	0.25	25
0	0.493525	0.649	0.203	0	Gng12	EC/EndoC	Two-sided Wilcoxon test	0.25	25
0	0.493433	0.377	0.056	0	Chn2	EC/EndoC	Two-sided Wilcoxon test	0.25	25
2.85138e-133	0.493373	0.971	0.826	6.63544e-129	Rbm39	EC/EndoC	Two-sided Wilcoxon test	0.25	25
0	0.492837	0.688	0.226	0	Sypl	EC/EndoC	Two-sided Wilcoxon test	0.25	25
0	0.492818	0.675	0.224	0	Ndfip2	EC/EndoC	Two-sided Wilcoxon test	0.25	25
1.12649e-183	0.492664	0.775	0.365	2.62146e-179	Chd7	EC/EndoC	Two-sided Wilcoxon test	0.25	25
4.98954e-231	0.492565	0.657	0.249	1.16112e-226	Fto	EC/EndoC	Two-sided Wilcoxon test	0.25	25
1.71099e-145	0.49239	0.766	0.44	3.98165e-141	Prkar1a	EC/EndoC	Two-sided Wilcoxon test	0.25	25
0	0.492282	0.536	0.121	0	Rgl1	EC/EndoC	Two-sided Wilcoxon test	0.25	25
5.69401e-190	0.492081	0.677	0.281	1.32505e-185	Dock7	EC/EndoC	Two-sided Wilcoxon test	0.25	25
1.00422e-128	0.492017	0.886	0.672	2.33693e-124	Ywhaq	EC/EndoC	Two-sided Wilcoxon test	0.25	25
4.94415e-304	0.491194	0.661	0.219	1.15055e-299	Smarcd1	EC/EndoC	Two-sided Wilcoxon test	0.25	25
1.84172e-219	0.490792	0.718	0.296	4.28587e-215	Csnk1g3	EC/EndoC	Two-sided Wilcoxon test	0.25	25
1.62615e-188	0.490255	0.521	0.196	3.78422e-184	Gtdc1	EC/EndoC	Two-sided Wilcoxon test	0.25	25
1.3227e-205	0.49011	0.606	0.236	3.07805e-201	Cdc42bpa	EC/EndoC	Two-sided Wilcoxon test	0.25	25
7.37089e-180	0.489996	0.75	0.344	1.71528e-175	Braf	EC/EndoC	Two-sided Wilcoxon test	0.25	25
6.96371e-184	0.489708	0.68	0.279	1.62053e-179	C430049B03Rik	EC/EndoC	Two-sided Wilcoxon test	0.25	25
9.13643e-240	0.489628	0.669	0.259	2.12614e-235	Ralgps2	EC/EndoC	Two-sided Wilcoxon test	0.25	25
0	0.489251	0.627	0.18	0	Lamc1	EC/EndoC	Two-sided Wilcoxon test	0.25	25
2.48666e-167	0.48863	0.718	0.345	5.78671e-163	Sqstm1	EC/EndoC	Two-sided Wilcoxon test	0.25	25
0	0.488001	0.37	0.015	0	Stab1	EC/EndoC	Two-sided Wilcoxon test	0.25	25
0	0.487833	0.47	0.088	0	Slc9a3r2	EC/EndoC	Two-sided Wilcoxon test	0.25	25
4.6306e-186	0.487207	0.734	0.331	1.07759e-181	Mbtd1	EC/EndoC	Two-sided Wilcoxon test	0.25	25
7.30845e-273	0.486753	0.642	0.224	1.70075e-268	Ndel1	EC/EndoC	Two-sided Wilcoxon test	0.25	25
2.83733e-205	0.486439	0.711	0.303	6.60276e-201	Klhdc10	EC/EndoC	Two-sided Wilcoxon test	0.25	25
7.6043e-244	0.486175	0.675	0.233	1.7696e-239	Gata4	EC/EndoC	Two-sided Wilcoxon test	0.25	25
8.162e-163	0.485877	0.767	0.373	1.89938e-158	Cdk12	EC/EndoC	Two-sided Wilcoxon test	0.25	25
5.38622e-231	0.485834	0.678	0.244	1.25343e-226	Dpysl3	EC/EndoC	Two-sided Wilcoxon test	0.25	25
5.65268e-107	0.485778	0.943	0.699	1.31543e-102	Luc7l2	EC/EndoC	Two-sided Wilcoxon test	0.25	25
9.33509e-218	0.484693	0.51	0.174	2.17237e-213	Rps6ka5	EC/EndoC	Two-sided Wilcoxon test	0.25	25
6.02498e-160	0.484501	0.732	0.36	1.40207e-155	P4hb	EC/EndoC	Two-sided Wilcoxon test	0.25	25
5.9349e-292	0.484193	0.612	0.192	1.38111e-287	Fchsd2	EC/EndoC	Two-sided Wilcoxon test	0.25	25
1.83281e-212	0.484017	0.583	0.205	4.26513e-208	Bach2	EC/EndoC	Two-sided Wilcoxon test	0.25	25
3.25171e-178	0.483957	0.767	0.363	7.56705e-174	Tpp2	EC/EndoC	Two-sided Wilcoxon test	0.25	25
1.42953e-246	0.483942	0.698	0.25	3.32665e-242	Ckap4	EC/EndoC	Two-sided Wilcoxon test	0.25	25
5.56824e-176	0.483713	0.677	0.301	1.29578e-171	Cdkal1	EC/EndoC	Two-sided Wilcoxon test	0.25	25
1.86244e-215	0.483479	0.511	0.176	4.33407e-211	Sat1	EC/EndoC	Two-sided Wilcoxon test	0.25	25
1.43335e-133	0.482453	0.878	0.52	3.33556e-129	Senp6	EC/EndoC	Two-sided Wilcoxon test	0.25	25
0	0.482086	0.491	0.09	0	Ggta1	EC/EndoC	Two-sided Wilcoxon test	0.25	25
3.9896e-91	0.481904	0.913	0.725	9.28419e-87	Tuba1a	EC/EndoC	Two-sided Wilcoxon test	0.25	25
4.14524e-201	0.481185	0.767	0.35	9.64638e-197	March7	EC/EndoC	Two-sided Wilcoxon test	0.25	25
0	0.481141	0.478	0.101	0	Cd9	EC/EndoC	Two-sided Wilcoxon test	0.25	25
2.69547e-213	0.48101	0.707	0.296	6.27262e-209	Svil	EC/EndoC	Two-sided Wilcoxon test	0.25	25
0	0.480952	0.502	0.081	0	Fmnl3	EC/EndoC	Two-sided Wilcoxon test	0.25	25
1.80319e-267	0.480936	0.669	0.244	4.1962e-263	Abi1	EC/EndoC	Two-sided Wilcoxon test	0.25	25
1.32331e-230	0.480925	0.704	0.28	3.07948e-226	Smad2	EC/EndoC	Two-sided Wilcoxon test	0.25	25
2.82044e-123	0.48072	0.709	0.367	6.56344e-119	S100a10	EC/EndoC	Two-sided Wilcoxon test	0.25	25
2.07558e-174	0.480669	0.762	0.369	4.83007e-170	Rbbp6	EC/EndoC	Two-sided Wilcoxon test	0.25	25
1.06026e-297	0.480661	0.594	0.183	2.46732e-293	Hmbox1	EC/EndoC	Two-sided Wilcoxon test	0.25	25
0	0.480531	0.574	0.164	0	Tfpi	EC/EndoC	Two-sided Wilcoxon test	0.25	25
2.14817e-148	0.479875	0.85	0.451	4.999e-144	Birc6	EC/EndoC	Two-sided Wilcoxon test	0.25	25
2.54236e-288	0.479076	0.67	0.231	5.91633e-284	Ss18	EC/EndoC	Two-sided Wilcoxon test	0.25	25
0	0.479026	0.408	0.037	0	Bace2	EC/EndoC	Two-sided Wilcoxon test	0.25	25
2.66506e-210	0.478636	0.54	0.185	6.20187e-206	Tmtc2	EC/EndoC	Two-sided Wilcoxon test	0.25	25
7.11964e-239	0.478593	0.717	0.286	1.65681e-234	Wasl	EC/EndoC	Two-sided Wilcoxon test	0.25	25
1.12048e-280	0.478389	0.377	0.087	2.60746e-276	Lysmd4	EC/EndoC	Two-sided Wilcoxon test	0.25	25
3.23557e-300	0.47826	0.641	0.205	7.5295e-296	Prrc2b	EC/EndoC	Two-sided Wilcoxon test	0.25	25
1.48868e-227	0.477844	0.636	0.24	3.46432e-223	Csnk1g1	EC/EndoC	Two-sided Wilcoxon test	0.25	25
0	0.4778	0.515	0.109	0	Dok4	EC/EndoC	Two-sided Wilcoxon test	0.25	25
3.76827e-213	0.477732	0.728	0.309	8.76914e-209	Bptf	EC/EndoC	Two-sided Wilcoxon test	0.25	25
3.70983e-214	0.477646	0.825	0.35	8.63315e-210	Afdn	EC/EndoC	Two-sided Wilcoxon test	0.25	25
0	0.47754	0.44	0.025	0	Thsd1	EC/EndoC	Two-sided Wilcoxon test	0.25	25
3.62656e-289	0.477307	0.473	0.123	8.43936e-285	Syne1	EC/EndoC	Two-sided Wilcoxon test	0.25	25
6.68558e-117	0.477304	0.925	0.675	1.5558e-112	Rbm25	EC/EndoC	Two-sided Wilcoxon test	0.25	25
2.70666e-189	0.476033	0.696	0.308	6.29867e-185	Rc3h1	EC/EndoC	Two-sided Wilcoxon test	0.25	25
0	0.475594	0.661	0.211	0	Mpzl1	EC/EndoC	Two-sided Wilcoxon test	0.25	25
2.34913e-183	0.475587	0.749	0.345	5.46666e-179	Scaf8	EC/EndoC	Two-sided Wilcoxon test	0.25	25
4.30298e-142	0.475208	0.816	0.455	1.00135e-137	Ddx6	EC/EndoC	Two-sided Wilcoxon test	0.25	25
0	0.475085	0.505	0.134	0	Atxn7	EC/EndoC	Two-sided Wilcoxon test	0.25	25
4.17227e-238	0.474912	0.686	0.263	9.70928e-234	Dync1h1	EC/EndoC	Two-sided Wilcoxon test	0.25	25
5.27874e-169	0.474878	0.69	0.315	1.22842e-164	Stk3	EC/EndoC	Two-sided Wilcoxon test	0.25	25
6.80742e-158	0.473957	0.678	0.318	1.58415e-153	Crebrf	EC/EndoC	Two-sided Wilcoxon test	0.25	25
3.07554e-173	0.473774	0.809	0.395	7.1571e-169	Cnot2	EC/EndoC	Two-sided Wilcoxon test	0.25	25
7.53103e-244	0.473461	0.694	0.256	1.75255e-239	Sh3bgrl	EC/EndoC	Two-sided Wilcoxon test	0.25	25
1.39377e-269	0.473063	0.615	0.211	3.24345e-265	Zc3h7a	EC/EndoC	Two-sided Wilcoxon test	0.25	25
3.8003e-95	0.472692	0.842	0.667	8.84368e-91	Cdk4	EC/EndoC	Two-sided Wilcoxon test	0.25	25
0	0.472444	0.629	0.185	0	Zfyve9	EC/EndoC	Two-sided Wilcoxon test	0.25	25
3.66345e-123	0.472146	0.932	0.73	8.52522e-119	Nedd4	EC/EndoC	Two-sided Wilcoxon test	0.25	25
0	0.471683	0.425	0.037	0	Gpr182	EC/EndoC	Two-sided Wilcoxon test	0.25	25
0	0.471666	0.574	0.162	0	Raph1	EC/EndoC	Two-sided Wilcoxon test	0.25	25
1.06516e-182	0.470612	0.736	0.34	2.47872e-178	Hsd17b12	EC/EndoC	Two-sided Wilcoxon test	0.25	25
5.14425e-164	0.470385	0.779	0.395	1.19712e-159	Dync1i2	EC/EndoC	Two-sided Wilcoxon test	0.25	25
4.72426e-307	0.469129	0.464	0.117	1.09938e-302	Grk5	EC/EndoC	Two-sided Wilcoxon test	0.25	25
4.13878e-273	0.469127	0.684	0.246	9.63137e-269	Snx4	EC/EndoC	Two-sided Wilcoxon test	0.25	25
0	0.468988	0.402	0.038	0	Bmx	EC/EndoC	Two-sided Wilcoxon test	0.25	25
0	0.468716	0.468	0.098	0	Pik3r3	EC/EndoC	Two-sided Wilcoxon test	0.25	25
7.10629e-169	0.467843	0.77	0.388	1.6537e-164	Tmbim6	EC/EndoC	Two-sided Wilcoxon test	0.25	25
5.46524e-147	0.467458	0.83	0.446	1.27182e-142	Phf3	EC/EndoC	Two-sided Wilcoxon test	0.25	25
3.64761e-128	0.467326	0.746	0.432	8.48835e-124	Ddost	EC/EndoC	Two-sided Wilcoxon test	0.25	25
2.01327e-187	0.466611	0.719	0.321	4.68508e-183	Ppp6r3	EC/EndoC	Two-sided Wilcoxon test	0.25	25
1.12106e-175	0.465606	0.465	0.161	2.60882e-171	Timp3	EC/EndoC	Two-sided Wilcoxon test	0.25	25
7.60177e-136	0.4655	0.799	0.421	1.76901e-131	Rsrc1	EC/EndoC	Two-sided Wilcoxon test	0.25	25
1.21923e-60	0.465132	0.982	0.914	2.83726e-56	mt-Nd2	EC/EndoC	Two-sided Wilcoxon test	0.25	25
1.25927e-85	0.465061	0.934	0.782	2.93045e-81	Pkm	EC/EndoC	Two-sided Wilcoxon test	0.25	25
2.94707e-277	0.464959	0.558	0.174	6.85814e-273	Uaca	EC/EndoC	Two-sided Wilcoxon test	0.25	25
0	0.464164	0.428	0.023	0	Nos3	EC/EndoC	Two-sided Wilcoxon test	0.25	25
6.76692e-259	0.464104	0.391	0.099	1.57473e-254	Ccdc138	EC/EndoC	Two-sided Wilcoxon test	0.25	25
1.41271e-248	0.462854	0.734	0.262	3.28751e-244	Igf2bp2	EC/EndoC	Two-sided Wilcoxon test	0.25	25
4.47524e-130	0.462648	0.781	0.422	1.04143e-125	Maged1	EC/EndoC	Two-sided Wilcoxon test	0.25	25
1.04073e-240	0.462036	0.679	0.26	2.42188e-236	Rnf111	EC/EndoC	Two-sided Wilcoxon test	0.25	25
1.41998e-198	0.461933	0.734	0.331	3.30443e-194	4931406P16Rik	EC/EndoC	Two-sided Wilcoxon test	0.25	25
1.72737e-193	0.461539	0.706	0.311	4.01976e-189	Exoc5	EC/EndoC	Two-sided Wilcoxon test	0.25	25
0	0.461283	0.52	0.114	0	Man2a1	EC/EndoC	Two-sided Wilcoxon test	0.25	25
2.07189e-240	0.46117	0.609	0.218	4.8215e-236	E2f3	EC/EndoC	Two-sided Wilcoxon test	0.25	25
1.07134e-136	0.460912	0.821	0.437	2.49311e-132	Tnks2	EC/EndoC	Two-sided Wilcoxon test	0.25	25
1.9963e-202	0.460594	0.677	0.278	4.64559e-198	Tbl1xr1	EC/EndoC	Two-sided Wilcoxon test	0.25	25
0	0.460471	0.326	0.047	0	Arhgef3	EC/EndoC	Two-sided Wilcoxon test	0.25	25
1.59564e-112	0.460448	0.902	0.598	3.71322e-108	Son	EC/EndoC	Two-sided Wilcoxon test	0.25	25
1.29338e-85	0.459815	0.94	0.841	3.00983e-81	Snrpg	EC/EndoC	Two-sided Wilcoxon test	0.25	25
3.10493e-289	0.459806	0.584	0.183	7.22549e-285	Nlk	EC/EndoC	Two-sided Wilcoxon test	0.25	25
0	0.459642	0.508	0.131	0	Mcu	EC/EndoC	Two-sided Wilcoxon test	0.25	25
1.83252e-92	0.459405	0.871	0.692	4.26445e-88	Sem1	EC/EndoC	Two-sided Wilcoxon test	0.25	25
0	0.459084	0.686	0.224	0	Rab12	EC/EndoC	Two-sided Wilcoxon test	0.25	25
0	0.458813	0.523	0.089	0	Mtus1	EC/EndoC	Two-sided Wilcoxon test	0.25	25
1.16816e-178	0.4586	0.786	0.371	2.71842e-174	Fam168b	EC/EndoC	Two-sided Wilcoxon test	0.25	25
1.49609e-106	0.458552	0.883	0.58	3.48155e-102	Prpf40a	EC/EndoC	Two-sided Wilcoxon test	0.25	25
1.59268e-140	0.458115	0.834	0.449	3.70633e-136	Pcm1	EC/EndoC	Two-sided Wilcoxon test	0.25	25
3.2543e-159	0.458099	0.797	0.399	7.57307e-155	Kpna4	EC/EndoC	Two-sided Wilcoxon test	0.25	25
0	0.457365	0.506	0.114	0	Stim2	EC/EndoC	Two-sided Wilcoxon test	0.25	25
4.98043e-104	0.457318	0.937	0.83	1.159e-99	Sub1	EC/EndoC	Two-sided Wilcoxon test	0.25	25
1.86517e-234	0.456922	0.625	0.23	4.34043e-230	Fbxw11	EC/EndoC	Two-sided Wilcoxon test	0.25	25
0	0.456893	0.549	0.152	0	Tspan14	EC/EndoC	Two-sided Wilcoxon test	0.25	25
1.02085e-230	0.456582	0.637	0.226	2.37561e-226	Ppp2r3a	EC/EndoC	Two-sided Wilcoxon test	0.25	25
7.19934e-250	0.456423	0.348	0.082	1.67536e-245	B830012L14Rik	EC/EndoC	Two-sided Wilcoxon test	0.25	25
2.9341e-147	0.456402	0.769	0.405	6.82793e-143	Lman1	EC/EndoC	Two-sided Wilcoxon test	0.25	25
4.70832e-257	0.45637	0.648	0.223	1.09567e-252	Frmd4a	EC/EndoC	Two-sided Wilcoxon test	0.25	25
4.20078e-249	0.455271	0.671	0.233	9.77564e-245	Actn1	EC/EndoC	Two-sided Wilcoxon test	0.25	25
5.09437e-117	0.45514	0.866	0.492	1.18551e-112	Huwe1	EC/EndoC	Two-sided Wilcoxon test	0.25	25
4.29087e-246	0.454757	0.636	0.244	9.98528e-242	Abhd17a	EC/EndoC	Two-sided Wilcoxon test	0.25	25
6.76698e-236	0.453888	0.609	0.214	1.57474e-231	Mtss1	EC/EndoC	Two-sided Wilcoxon test	0.25	25
0	0.453517	0.439	0.091	0	Plpp1	EC/EndoC	Two-sided Wilcoxon test	0.25	25
0	0.453426	0.465	0.03	0	She	EC/EndoC	Two-sided Wilcoxon test	0.25	25
9.07754e-196	0.45339	0.779	0.343	2.11243e-191	Ehmt1	EC/EndoC	Two-sided Wilcoxon test	0.25	25
5.69013e-157	0.453073	0.594	0.246	1.32415e-152	Rbp1	EC/EndoC	Two-sided Wilcoxon test	0.25	25
3.67791e-160	0.45298	0.774	0.374	8.55886e-156	Calu	EC/EndoC	Two-sided Wilcoxon test	0.25	25
2.04752e-121	0.452857	0.889	0.522	4.76478e-117	Pum1	EC/EndoC	Two-sided Wilcoxon test	0.25	25
2.74529e-121	0.452528	0.857	0.52	6.38857e-117	Khdrbs1	EC/EndoC	Two-sided Wilcoxon test	0.25	25
1.59205e-285	0.45196	0.621	0.202	3.70485e-281	Gna11	EC/EndoC	Two-sided Wilcoxon test	0.25	25
1.51196e-281	0.451553	0.629	0.202	3.51847e-277	Limd2	EC/EndoC	Two-sided Wilcoxon test	0.25	25
1.26676e-142	0.451511	0.735	0.355	2.94789e-138	Rhoc	EC/EndoC	Two-sided Wilcoxon test	0.25	25
0	0.451054	0.633	0.181	0	Dab2ip	EC/EndoC	Two-sided Wilcoxon test	0.25	25
1.20389e-192	0.451049	0.665	0.278	2.80157e-188	Pdia4	EC/EndoC	Two-sided Wilcoxon test	0.25	25
1.68515e-39	0.451014	0.344	0.195	3.92152e-35	Sox6	EC/EndoC	Two-sided Wilcoxon test	0.25	25
2.76069e-118	0.450345	0.88	0.522	6.42441e-114	Ppp1r12a	EC/EndoC	Two-sided Wilcoxon test	0.25	25
9.32775e-106	0.450244	0.877	0.584	2.17066e-101	Sparc	EC/EndoC	Two-sided Wilcoxon test	0.25	25
8.85416e-184	0.450193	0.784	0.363	2.06045e-179	Wsb1	EC/EndoC	Two-sided Wilcoxon test	0.25	25
2.04912e-225	0.449965	0.65	0.249	4.7685e-221	Arnt	EC/EndoC	Two-sided Wilcoxon test	0.25	25
1.55548e-106	0.449916	0.88	0.529	3.61975e-102	Arid4b	EC/EndoC	Two-sided Wilcoxon test	0.25	25
1.62818e-228	0.449601	0.652	0.247	3.78893e-224	Cdc42se2	EC/EndoC	Two-sided Wilcoxon test	0.25	25
6.51775e-193	0.44922	0.716	0.313	1.51674e-188	Pds5b	EC/EndoC	Two-sided Wilcoxon test	0.25	25
5.22273e-156	0.448847	0.302	0.087	1.21538e-151	Cdh13	EC/EndoC	Two-sided Wilcoxon test	0.25	25
0	0.448634	0.548	0.148	0	Anxa3	EC/EndoC	Two-sided Wilcoxon test	0.25	25
2.59499e-264	0.448426	0.586	0.194	6.03881e-260	Mon2	EC/EndoC	Two-sided Wilcoxon test	0.25	25
0	0.448381	0.45	0.103	0	Shroom2	EC/EndoC	Two-sided Wilcoxon test	0.25	25
9.91692e-187	0.447283	0.738	0.335	2.30777e-182	Appbp2	EC/EndoC	Two-sided Wilcoxon test	0.25	25
1.18352e-138	0.447283	0.527	0.225	2.75417e-134	Gm37240	EC/EndoC	Two-sided Wilcoxon test	0.25	25
8.56002e-232	0.447181	0.698	0.279	1.992e-227	Vps4b	EC/EndoC	Two-sided Wilcoxon test	0.25	25
0	0.447057	0.586	0.15	0	Sept10	EC/EndoC	Two-sided Wilcoxon test	0.25	25
0	0.44701	0.485	0.122	0	Pik3r1	EC/EndoC	Two-sided Wilcoxon test	0.25	25
7.38195e-86	0.446943	0.964	0.918	1.71785e-81	Prdx1	EC/EndoC	Two-sided Wilcoxon test	0.25	25
0	0.446627	0.477	0.105	0	Fam102b	EC/EndoC	Two-sided Wilcoxon test	0.25	25
6.20188e-220	0.446607	0.69	0.274	1.44324e-215	Gipc1	EC/EndoC	Two-sided Wilcoxon test	0.25	25
1.02281e-102	0.446585	0.878	0.607	2.38018e-98	Hspa4	EC/EndoC	Two-sided Wilcoxon test	0.25	25
5.79032e-176	0.446163	0.663	0.287	1.34747e-171	Btbd9	EC/EndoC	Two-sided Wilcoxon test	0.25	25
5.66789e-156	0.446006	0.742	0.362	1.31897e-151	Nsd2	EC/EndoC	Two-sided Wilcoxon test	0.25	25
0	0.445883	0.331	0.059	0	Stard13	EC/EndoC	Two-sided Wilcoxon test	0.25	25
0	0.445789	0.525	0.128	0	Fam222b	EC/EndoC	Two-sided Wilcoxon test	0.25	25
0	0.445779	0.357	0.063	0	Pdzd2	EC/EndoC	Two-sided Wilcoxon test	0.25	25
9.17788e-269	0.445606	0.473	0.133	2.13578e-264	Mgat5	EC/EndoC	Two-sided Wilcoxon test	0.25	25
1.53254e-117	0.44535	0.934	0.704	3.56637e-113	Csnk1a1	EC/EndoC	Two-sided Wilcoxon test	0.25	25
5.39364e-131	0.445105	0.813	0.446	1.25515e-126	Smchd1	EC/EndoC	Two-sided Wilcoxon test	0.25	25
7.25335e-166	0.444086	0.762	0.38	1.68793e-161	Elf2	EC/EndoC	Two-sided Wilcoxon test	0.25	25
1.0503e-131	0.443413	0.788	0.441	2.44415e-127	Ssr3	EC/EndoC	Two-sided Wilcoxon test	0.25	25
8.45586e-249	0.443313	0.643	0.223	1.96776e-244	Arhgap29	EC/EndoC	Two-sided Wilcoxon test	0.25	25
2.63618e-132	0.443313	0.796	0.43	6.13466e-128	Cnot4	EC/EndoC	Two-sided Wilcoxon test	0.25	25
1.61102e-101	0.443066	0.902	0.669	3.74901e-97	Srsf11	EC/EndoC	Two-sided Wilcoxon test	0.25	25
1.0858e-248	0.441623	0.54	0.167	2.52676e-244	Gm49708	EC/EndoC	Two-sided Wilcoxon test	0.25	25
5.02317e-187	0.441425	0.711	0.328	1.16894e-182	Ipo11	EC/EndoC	Two-sided Wilcoxon test	0.25	25
1.15627e-74	0.441143	0.923	0.757	2.69075e-70	Igf2	EC/EndoC	Two-sided Wilcoxon test	0.25	25
5.88149e-171	0.440077	0.652	0.287	1.36868e-166	Lrrc58	EC/EndoC	Two-sided Wilcoxon test	0.25	25
3.53992e-126	0.439591	0.757	0.43	8.23774e-122	Selenok	EC/EndoC	Two-sided Wilcoxon test	0.25	25
0	0.439301	0.46	0.069	0	Rasgrp2	EC/EndoC	Two-sided Wilcoxon test	0.25	25
1.13012e-119	0.439221	0.865	0.495	2.6299e-115	Strn3	EC/EndoC	Two-sided Wilcoxon test	0.25	25
1.68086e-87	0.439063	0.862	0.611	3.91153e-83	Manf	EC/EndoC	Two-sided Wilcoxon test	0.25	25
2.21509e-162	0.438544	0.765	0.387	5.15473e-158	Pitpna	EC/EndoC	Two-sided Wilcoxon test	0.25	25
3.28777e-214	0.438328	0.709	0.292	7.65096e-210	Setd2	EC/EndoC	Two-sided Wilcoxon test	0.25	25
2.37885e-286	0.438072	0.377	0.085	5.53581e-282	Abr	EC/EndoC	Two-sided Wilcoxon test	0.25	25
3.33055e-93	0.437985	0.862	0.663	7.75051e-89	Ubc	EC/EndoC	Two-sided Wilcoxon test	0.25	25
6.81282e-133	0.437734	0.771	0.403	1.58541e-128	Mkln1	EC/EndoC	Two-sided Wilcoxon test	0.25	25
1.40733e-239	0.436958	0.702	0.271	3.275e-235	Gorasp2	EC/EndoC	Two-sided Wilcoxon test	0.25	25
0	0.436687	0.457	0.044	0	Hhex	EC/EndoC	Two-sided Wilcoxon test	0.25	25
9.01956e-292	0.436129	0.612	0.181	2.09894e-287	Gli3	EC/EndoC	Two-sided Wilcoxon test	0.25	25
0	0.435973	0.386	0.05	0	Slc45a4	EC/EndoC	Two-sided Wilcoxon test	0.25	25
0	0.435729	0.512	0.104	0	Fam107b	EC/EndoC	Two-sided Wilcoxon test	0.25	25
0	0.435118	0.36	0.04	0	Asah2	EC/EndoC	Two-sided Wilcoxon test	0.25	25
1.25326e-109	0.434787	0.838	0.564	2.91647e-105	Gdi2	EC/EndoC	Two-sided Wilcoxon test	0.25	25
0	0.434369	0.548	0.137	0	Cttnbp2nl	EC/EndoC	Two-sided Wilcoxon test	0.25	25
6.91757e-111	0.433221	0.873	0.538	1.60979e-106	Ktn1	EC/EndoC	Two-sided Wilcoxon test	0.25	25
6.28649e-139	0.433085	0.819	0.44	1.46293e-134	Mier1	EC/EndoC	Two-sided Wilcoxon test	0.25	25
1.90116e-128	0.432928	0.773	0.431	4.42418e-124	G3bp2	EC/EndoC	Two-sided Wilcoxon test	0.25	25
0	0.43278	0.569	0.141	0	Smarca2	EC/EndoC	Two-sided Wilcoxon test	0.25	25
1.27844e-276	0.432592	0.605	0.192	2.97507e-272	Ubtd2	EC/EndoC	Two-sided Wilcoxon test	0.25	25
0	0.432591	0.54	0.134	0	Nab1	EC/EndoC	Two-sided Wilcoxon test	0.25	25
3.14968e-224	0.432274	0.655	0.256	7.32962e-220	Mdm2	EC/EndoC	Two-sided Wilcoxon test	0.25	25
2.5466e-275	0.431366	0.514	0.145	5.92618e-271	Nhsl2	EC/EndoC	Two-sided Wilcoxon test	0.25	25
2.14447e-117	0.431332	0.945	0.8	4.9904e-113	Morf4l1	EC/EndoC	Two-sided Wilcoxon test	0.25	25
0	0.430776	0.537	0.122	0	Cpd	EC/EndoC	Two-sided Wilcoxon test	0.25	25
4.47545e-103	0.430547	0.902	0.625	1.04148e-98	Vcp	EC/EndoC	Two-sided Wilcoxon test	0.25	25
0	0.430514	0.335	0.052	0	Samd5	EC/EndoC	Two-sided Wilcoxon test	0.25	25
0	0.429872	0.491	0.115	0	Lhfpl2	EC/EndoC	Two-sided Wilcoxon test	0.25	25
4.79012e-207	0.428903	0.513	0.181	1.11471e-202	Trappc9	EC/EndoC	Two-sided Wilcoxon test	0.25	25
2.0481e-176	0.428794	0.537	0.205	4.76613e-172	Nr6a1	EC/EndoC	Two-sided Wilcoxon test	0.25	25
1.21287e-206	0.428112	0.665	0.267	2.82246e-202	Epc2	EC/EndoC	Two-sided Wilcoxon test	0.25	25
0	0.427535	0.385	0.038	0	Arhgef9	EC/EndoC	Two-sided Wilcoxon test	0.25	25
0	0.427076	0.546	0.145	0	Cast	EC/EndoC	Two-sided Wilcoxon test	0.25	25
0	0.427067	0.509	0.126	0	Ptgis	EC/EndoC	Two-sided Wilcoxon test	0.25	25
1.32754e-231	0.427034	0.701	0.266	3.08932e-227	Evl	EC/EndoC	Two-sided Wilcoxon test	0.25	25
1.04277e-147	0.426843	0.645	0.315	2.42663e-143	Ppp1r15a	EC/EndoC	Two-sided Wilcoxon test	0.25	25
1.11263e-178	0.426783	0.619	0.262	2.58919e-174	Itsn1	EC/EndoC	Two-sided Wilcoxon test	0.25	25
0	0.426122	0.504	0.126	0	Zfp532	EC/EndoC	Two-sided Wilcoxon test	0.25	25
0	0.425699	0.417	0.075	0	Mbnl3	EC/EndoC	Two-sided Wilcoxon test	0.25	25
6.04346e-223	0.425503	0.614	0.229	1.40637e-218	Mapk8	EC/EndoC	Two-sided Wilcoxon test	0.25	25
1.49824e-168	0.425209	0.756	0.347	3.48655e-164	Igf2bp1	EC/EndoC	Two-sided Wilcoxon test	0.25	25
6.76405e-269	0.425045	0.615	0.193	1.57406e-264	Zfp462	EC/EndoC	Two-sided Wilcoxon test	0.25	25
2.28184e-266	0.425005	0.59	0.182	5.31006e-262	Adgrl2	EC/EndoC	Two-sided Wilcoxon test	0.25	25
5.33975e-169	0.424903	0.737	0.344	1.24261e-164	Kdm5a	EC/EndoC	Two-sided Wilcoxon test	0.25	25
0	0.424587	0.554	0.132	0	Cmtm3	EC/EndoC	Two-sided Wilcoxon test	0.25	25
4.36493e-209	0.424417	0.688	0.276	1.01576e-204	Rabgap1	EC/EndoC	Two-sided Wilcoxon test	0.25	25
0	0.424201	0.485	0.109	0	Sh3bp5	EC/EndoC	Two-sided Wilcoxon test	0.25	25
0	0.422992	0.36	0.052	0	Nfkbiz	EC/EndoC	Two-sided Wilcoxon test	0.25	25
3.47858e-144	0.422961	0.767	0.393	8.09501e-140	Nsmce2	EC/EndoC	Two-sided Wilcoxon test	0.25	25
0	0.422887	0.485	0.118	0	Crybg3	EC/EndoC	Two-sided Wilcoxon test	0.25	25
3.05572e-204	0.42262	0.494	0.159	7.11096e-200	Esrrg	EC/EndoC	Two-sided Wilcoxon test	0.25	25
3.28186e-37	0.422539	0.997	0.991	7.63721e-33	mt-Atp6	EC/EndoC	Two-sided Wilcoxon test	0.25	25
3.08779e-54	0.421766	0.999	0.988	7.1856e-50	mt-Co2	EC/EndoC	Two-sided Wilcoxon test	0.25	25
1.66221e-94	0.421013	0.822	0.608	3.86813e-90	Arpc3	EC/EndoC	Two-sided Wilcoxon test	0.25	25
1.23419e-196	0.420974	0.594	0.211	2.87209e-192	Colec12	EC/EndoC	Two-sided Wilcoxon test	0.25	25
0	0.420452	0.383	0.042	0	S100a16	EC/EndoC	Two-sided Wilcoxon test	0.25	25
2.95436e-78	0.420421	0.93	0.851	6.8751e-74	Gng5	EC/EndoC	Two-sided Wilcoxon test	0.25	25
3.68087e-129	0.419995	0.8	0.433	8.56576e-125	Mapk1	EC/EndoC	Two-sided Wilcoxon test	0.25	25
7.13326e-280	0.419701	0.554	0.17	1.65998e-275	Setx	EC/EndoC	Two-sided Wilcoxon test	0.25	25
5.57788e-135	0.419497	0.636	0.308	1.29803e-130	Btg2	EC/EndoC	Two-sided Wilcoxon test	0.25	25
9.48079e-95	0.419191	0.897	0.619	2.20627e-90	Pafah1b1	EC/EndoC	Two-sided Wilcoxon test	0.25	25
2.48062e-166	0.419158	0.73	0.339	5.77264e-162	Asxl1	EC/EndoC	Two-sided Wilcoxon test	0.25	25
7.70091e-102	0.418855	0.888	0.575	1.79208e-97	Thrap3	EC/EndoC	Two-sided Wilcoxon test	0.25	25
0	0.41883	0.514	0.1	0	Amotl1	EC/EndoC	Two-sided Wilcoxon test	0.25	25
0	0.418618	0.437	0.086	0	Zfp711	EC/EndoC	Two-sided Wilcoxon test	0.25	25
0	0.418429	0.327	0.018	0	Clec14a	EC/EndoC	Two-sided Wilcoxon test	0.25	25
8.09239e-156	0.417869	0.757	0.365	1.88318e-151	Chd6	EC/EndoC	Two-sided Wilcoxon test	0.25	25
1.82713e-190	0.417306	0.738	0.337	4.25191e-186	Capza1	EC/EndoC	Two-sided Wilcoxon test	0.25	25
0	0.416612	0.563	0.146	0	Rcsd1	EC/EndoC	Two-sided Wilcoxon test	0.25	25
2.60137e-166	0.416166	0.751	0.353	6.05365e-162	Nufip2	EC/EndoC	Two-sided Wilcoxon test	0.25	25
3.21557e-235	0.415925	0.538	0.179	7.48294e-231	Dis3l2	EC/EndoC	Two-sided Wilcoxon test	0.25	25
1.04003e-250	0.415798	0.625	0.218	2.42025e-246	Sec24b	EC/EndoC	Two-sided Wilcoxon test	0.25	25
3.73213e-223	0.415407	0.696	0.262	8.68504e-219	Rhobtb3	EC/EndoC	Two-sided Wilcoxon test	0.25	25
0	0.414931	0.257	0.011	0	Trpc6	EC/EndoC	Two-sided Wilcoxon test	0.25	25
0	0.414906	0.442	0.097	0	Nfic	EC/EndoC	Two-sided Wilcoxon test	0.25	25
0	0.414041	0.48	0.111	0	Parvb	EC/EndoC	Two-sided Wilcoxon test	0.25	25
6.36252e-215	0.413959	0.529	0.176	1.48062e-210	Psd3	EC/EndoC	Two-sided Wilcoxon test	0.25	25
9.35873e-299	0.413633	0.601	0.176	2.17787e-294	Mpdz	EC/EndoC	Two-sided Wilcoxon test	0.25	25
4.93927e-206	0.413317	0.7	0.271	1.14942e-201	Wwc2	EC/EndoC	Two-sided Wilcoxon test	0.25	25
9.95391e-203	0.413221	0.513	0.181	2.31638e-198	Phlda1	EC/EndoC	Two-sided Wilcoxon test	0.25	25
4.84966e-235	0.413204	0.611	0.217	1.12856e-230	Yeats2	EC/EndoC	Two-sided Wilcoxon test	0.25	25
8.37442e-126	0.413109	0.826	0.449	1.94881e-121	Rbm26	EC/EndoC	Two-sided Wilcoxon test	0.25	25
0	0.412911	0.361	0.032	0	Dusp2	EC/EndoC	Two-sided Wilcoxon test	0.25	25
6.89375e-201	0.412818	0.694	0.289	1.60424e-196	Sec31a	EC/EndoC	Two-sided Wilcoxon test	0.25	25
0	0.412205	0.556	0.156	0	B4galt1	EC/EndoC	Two-sided Wilcoxon test	0.25	25
2.53939e-93	0.411919	0.786	0.531	5.90941e-89	Dad1	EC/EndoC	Two-sided Wilcoxon test	0.25	25
0	0.411756	0.556	0.13	0	Rab4a	EC/EndoC	Two-sided Wilcoxon test	0.25	25
1.92365e-300	0.411516	0.598	0.185	4.47652e-296	Ssbp4	EC/EndoC	Two-sided Wilcoxon test	0.25	25
3.63432e-304	0.411103	0.543	0.159	8.45743e-300	Usp12	EC/EndoC	Two-sided Wilcoxon test	0.25	25
0	0.410128	0.5	0.114	0	Lamb1	EC/EndoC	Two-sided Wilcoxon test	0.25	25
2.28996e-149	0.410101	0.769	0.385	5.32897e-145	Pds5a	EC/EndoC	Two-sided Wilcoxon test	0.25	25
2.909e-238	0.409495	0.655	0.242	6.76953e-234	Hook3	EC/EndoC	Two-sided Wilcoxon test	0.25	25
6.00116e-303	0.408973	0.276	0.045	1.39653e-298	Corin	EC/EndoC	Two-sided Wilcoxon test	0.25	25
1.25302e-223	0.408037	0.579	0.208	2.91591e-219	Khdc4	EC/EndoC	Two-sided Wilcoxon test	0.25	25
1.21863e-203	0.407913	0.679	0.255	2.83587e-199	Mef2c	EC/EndoC	Two-sided Wilcoxon test	0.25	25
4.02538e-150	0.407478	0.747	0.36	9.36746e-146	Tcf7l2	EC/EndoC	Two-sided Wilcoxon test	0.25	25
1.29639e-101	0.407392	0.814	0.526	3.01684e-97	Tmed9	EC/EndoC	Two-sided Wilcoxon test	0.25	25
4.71803e-214	0.407283	0.523	0.18	1.09793e-209	Fam117b	EC/EndoC	Two-sided Wilcoxon test	0.25	25
0	0.407183	0.31	0.02	0	Cyyr1	EC/EndoC	Two-sided Wilcoxon test	0.25	25
4.33708e-217	0.406876	0.598	0.224	1.00928e-212	Zbtb11	EC/EndoC	Two-sided Wilcoxon test	0.25	25
3.59236e-108	0.406857	0.865	0.511	8.35978e-104	Tut4	EC/EndoC	Two-sided Wilcoxon test	0.25	25
3.99918e-276	0.406788	0.607	0.192	9.30649e-272	Trim35	EC/EndoC	Two-sided Wilcoxon test	0.25	25
0	0.406766	0.51	0.135	0	Tspan13	EC/EndoC	Two-sided Wilcoxon test	0.25	25
4.12611e-151	0.406727	0.737	0.357	9.60187e-147	Chd1	EC/EndoC	Two-sided Wilcoxon test	0.25	25
2.7424e-238	0.4067	0.514	0.165	6.38185e-234	Pacs1	EC/EndoC	Two-sided Wilcoxon test	0.25	25
0	0.406508	0.46	0.111	0	Zfp948	EC/EndoC	Two-sided Wilcoxon test	0.25	25
0	0.406408	0.477	0.084	0	Itga5	EC/EndoC	Two-sided Wilcoxon test	0.25	25
6.88085e-225	0.406242	0.606	0.206	1.60124e-220	Arid5b	EC/EndoC	Two-sided Wilcoxon test	0.25	25
0	0.406241	0.344	0.063	0	Slc2a13	EC/EndoC	Two-sided Wilcoxon test	0.25	25
0	0.405825	0.435	0.088	0	Cbfa2t3	EC/EndoC	Two-sided Wilcoxon test	0.25	25
2.08414e-242	0.40514	0.631	0.22	4.85001e-238	Nectin2	EC/EndoC	Two-sided Wilcoxon test	0.25	25
1.12681e-168	0.404954	0.596	0.249	2.6222e-164	Specc1	EC/EndoC	Two-sided Wilcoxon test	0.25	25
7.86588e-239	0.404859	0.567	0.194	1.83047e-234	Pik3ca	EC/EndoC	Two-sided Wilcoxon test	0.25	25
3.27232e-247	0.404785	0.566	0.189	7.61502e-243	Fer	EC/EndoC	Two-sided Wilcoxon test	0.25	25
1.11547e-93	0.404782	0.922	0.786	2.59581e-89	Dnaja1	EC/EndoC	Two-sided Wilcoxon test	0.25	25
1.51002e-137	0.404469	0.661	0.316	3.51396e-133	Vps13b	EC/EndoC	Two-sided Wilcoxon test	0.25	25
3.05566e-187	0.404274	0.479	0.167	7.11084e-183	Scaper	EC/EndoC	Two-sided Wilcoxon test	0.25	25
5.92774e-182	0.404183	0.596	0.241	1.37944e-177	Fam193a	EC/EndoC	Two-sided Wilcoxon test	0.25	25
1.12006e-86	0.402756	0.793	0.481	2.60649e-82	Ifrd1	EC/EndoC	Two-sided Wilcoxon test	0.25	25
1.81462e-89	0.402474	0.872	0.668	4.2228e-85	Ddx39b	EC/EndoC	Two-sided Wilcoxon test	0.25	25
5.27994e-250	0.402042	0.441	0.122	1.2287e-245	Fxyd6	EC/EndoC	Two-sided Wilcoxon test	0.25	25
0	0.401332	0.343	0.034	0	Gatm	EC/EndoC	Two-sided Wilcoxon test	0.25	25
3.20874e-215	0.400866	0.627	0.245	7.46707e-211	Cyp20a1	EC/EndoC	Two-sided Wilcoxon test	0.25	25
9.81297e-121	0.400828	0.799	0.456	2.28358e-116	Hnrnpl	EC/EndoC	Two-sided Wilcoxon test	0.25	25
2.69884e-146	0.400796	0.788	0.391	6.28047e-142	Strbp	EC/EndoC	Two-sided Wilcoxon test	0.25	25
1.41312e-126	0.399788	0.796	0.42	3.28848e-122	Trpm7	EC/EndoC	Two-sided Wilcoxon test	0.25	25
1.66171e-198	0.399717	0.613	0.241	3.86697e-194	Atp9b	EC/EndoC	Two-sided Wilcoxon test	0.25	25
4.63213e-244	0.399506	0.554	0.179	1.07794e-239	Tbc1d1	EC/EndoC	Two-sided Wilcoxon test	0.25	25
0	0.398688	0.5	0.11	0	Cdc42ep5	EC/EndoC	Two-sided Wilcoxon test	0.25	25
3.68676e-83	0.398593	0.821	0.578	8.57945e-79	H2afv	EC/EndoC	Two-sided Wilcoxon test	0.25	25
3.9828e-164	0.398301	0.692	0.315	9.26838e-160	Ash1l	EC/EndoC	Two-sided Wilcoxon test	0.25	25
4.59296e-235	0.398186	0.621	0.219	1.06883e-230	Txndc5	EC/EndoC	Two-sided Wilcoxon test	0.25	25
4.39231e-238	0.397587	0.596	0.203	1.02214e-233	Skil	EC/EndoC	Two-sided Wilcoxon test	0.25	25
2.25678e-183	0.397575	0.708	0.321	5.25175e-179	Tram1	EC/EndoC	Two-sided Wilcoxon test	0.25	25
1.84737e-82	0.396593	0.855	0.686	4.29902e-78	Pcbp1	EC/EndoC	Two-sided Wilcoxon test	0.25	25
7.94067e-167	0.39646	0.703	0.329	1.84787e-162	Ubn1	EC/EndoC	Two-sided Wilcoxon test	0.25	25
1.51189e-148	0.396267	0.764	0.346	3.51833e-144	Vcl	EC/EndoC	Two-sided Wilcoxon test	0.25	25
2.754e-231	0.396042	0.67	0.254	6.40883e-227	Wdr45b	EC/EndoC	Two-sided Wilcoxon test	0.25	25
2.33206e-163	0.39604	0.629	0.269	5.42693e-159	Hells	EC/EndoC	Two-sided Wilcoxon test	0.25	25
1.19791e-125	0.395994	0.611	0.297	2.78766e-121	Rbbp8	EC/EndoC	Two-sided Wilcoxon test	0.25	25
0	0.395877	0.429	0.09	0	Itprid2	EC/EndoC	Two-sided Wilcoxon test	0.25	25
0	0.395738	0.523	0.117	0	Capn2	EC/EndoC	Two-sided Wilcoxon test	0.25	25
3.70093e-152	0.395701	0.729	0.359	8.61244e-148	Adss	EC/EndoC	Two-sided Wilcoxon test	0.25	25
0	0.395648	0.569	0.153	0	Lima1	EC/EndoC	Two-sided Wilcoxon test	0.25	25
1.12609e-143	0.395519	0.749	0.37	2.62053e-139	Rsf1	EC/EndoC	Two-sided Wilcoxon test	0.25	25
1.08064e-264	0.395343	0.652	0.23	2.51477e-260	Phc2	EC/EndoC	Two-sided Wilcoxon test	0.25	25
6.47993e-124	0.395278	0.402	0.158	1.50794e-119	Uty	EC/EndoC	Two-sided Wilcoxon test	0.25	25
0	0.394721	0.402	0.047	0	Lcp1	EC/EndoC	Two-sided Wilcoxon test	0.25	25
2.14711e-234	0.39431	0.334	0.079	4.99654e-230	Frem1	EC/EndoC	Two-sided Wilcoxon test	0.25	25
1.27806e-132	0.394285	0.7	0.365	2.97418e-128	Snrpb2	EC/EndoC	Two-sided Wilcoxon test	0.25	25
3.22713e-263	0.394282	0.586	0.196	7.50984e-259	Reep3	EC/EndoC	Two-sided Wilcoxon test	0.25	25
0	0.394189	0.485	0.094	0	Gask1b	EC/EndoC	Two-sided Wilcoxon test	0.25	25
4.00109e-94	0.393246	0.836	0.545	9.31094e-90	Vapa	EC/EndoC	Two-sided Wilcoxon test	0.25	25
6.61291e-130	0.393196	0.794	0.425	1.53889e-125	Cltc	EC/EndoC	Two-sided Wilcoxon test	0.25	25
1.76945e-256	0.393079	0.517	0.155	4.11769e-252	Clock	EC/EndoC	Two-sided Wilcoxon test	0.25	25
1.62622e-126	0.393001	0.798	0.439	3.78438e-122	Rab14	EC/EndoC	Two-sided Wilcoxon test	0.25	25
2.35978e-110	0.392031	0.838	0.475	5.49144e-106	Gpatch8	EC/EndoC	Two-sided Wilcoxon test	0.25	25
8.82652e-163	0.391991	0.669	0.298	2.05402e-158	Ubr3	EC/EndoC	Two-sided Wilcoxon test	0.25	25
3.60207e-200	0.391943	0.664	0.271	8.38239e-196	Arfgef1	EC/EndoC	Two-sided Wilcoxon test	0.25	25
8.23765e-296	0.391827	0.41	0.096	1.91698e-291	Traf3	EC/EndoC	Two-sided Wilcoxon test	0.25	25
5.93453e-215	0.39158	0.7	0.284	1.38102e-210	Psap	EC/EndoC	Two-sided Wilcoxon test	0.25	25
7.98741e-175	0.391563	0.688	0.315	1.85875e-170	Mtpn	EC/EndoC	Two-sided Wilcoxon test	0.25	25
5.48572e-279	0.391428	0.38	0.086	1.27658e-274	Pdgfd	EC/EndoC	Two-sided Wilcoxon test	0.25	25
1.47112e-92	0.391273	0.815	0.568	3.42345e-88	Srp9	EC/EndoC	Two-sided Wilcoxon test	0.25	25
1.59644e-190	0.390952	0.692	0.285	3.71507e-186	Rest	EC/EndoC	Two-sided Wilcoxon test	0.25	25
1.09045e-163	0.390923	0.581	0.24	2.53758e-159	Aopep	EC/EndoC	Two-sided Wilcoxon test	0.25	25
2.99751e-248	0.390751	0.631	0.217	6.97549e-244	Smad4	EC/EndoC	Two-sided Wilcoxon test	0.25	25
1.74111e-136	0.390144	0.734	0.391	4.05174e-132	Hdac1	EC/EndoC	Two-sided Wilcoxon test	0.25	25
7.26749e-97	0.389986	0.755	0.423	1.69122e-92	Id1	EC/EndoC	Two-sided Wilcoxon test	0.25	25
3.71388e-233	0.389622	0.623	0.222	8.64257e-229	Csnk1e	EC/EndoC	Two-sided Wilcoxon test	0.25	25
0	0.389613	0.451	0.102	0	Rassf3	EC/EndoC	Two-sided Wilcoxon test	0.25	25
1.46116e-88	0.389584	0.911	0.756	3.40026e-84	Rhoa	EC/EndoC	Two-sided Wilcoxon test	0.25	25
7.79784e-87	0.38944	0.834	0.603	1.81464e-82	Spcs2	EC/EndoC	Two-sided Wilcoxon test	0.25	25
2.99008e-186	0.389344	0.502	0.184	6.95822e-182	Rapgef1	EC/EndoC	Two-sided Wilcoxon test	0.25	25
3.51836e-194	0.389261	0.625	0.245	8.18758e-190	Zfp609	EC/EndoC	Two-sided Wilcoxon test	0.25	25
1.08219e-81	0.389247	0.889	0.657	2.51837e-77	Sfpq	EC/EndoC	Two-sided Wilcoxon test	0.25	25
6.0063e-131	0.389193	0.809	0.426	1.39773e-126	Wdr33	EC/EndoC	Two-sided Wilcoxon test	0.25	25
3.35887e-295	0.389074	0.596	0.178	7.81642e-291	Cbfb	EC/EndoC	Two-sided Wilcoxon test	0.25	25
1.12669e-230	0.388366	0.562	0.19	2.62193e-226	Ptpn9	EC/EndoC	Two-sided Wilcoxon test	0.25	25
3.10833e-174	0.388028	0.642	0.268	7.23341e-170	Phf21a	EC/EndoC	Two-sided Wilcoxon test	0.25	25
1.675e-89	0.387348	0.859	0.542	3.8979e-85	Mtdh	EC/EndoC	Two-sided Wilcoxon test	0.25	25
2.93531e-89	0.387047	0.895	0.629	6.83075e-85	Hnrnpm	EC/EndoC	Two-sided Wilcoxon test	0.25	25
6.22691e-86	0.387022	0.735	0.478	1.44907e-81	Atox1	EC/EndoC	Two-sided Wilcoxon test	0.25	25
5.52966e-204	0.386577	0.715	0.294	1.28681e-199	Glyr1	EC/EndoC	Two-sided Wilcoxon test	0.25	25
2.55563e-62	0.386264	0.897	0.788	5.9472e-58	Stmn1	EC/EndoC	Two-sided Wilcoxon test	0.25	25
9.81063e-160	0.386152	0.607	0.26	2.28303e-155	Mast2	EC/EndoC	Two-sided Wilcoxon test	0.25	25
2.18625e-158	0.386112	0.673	0.304	5.08763e-154	Atf2	EC/EndoC	Two-sided Wilcoxon test	0.25	25
6.02215e-181	0.385955	0.702	0.312	1.40141e-176	Mtf2	EC/EndoC	Two-sided Wilcoxon test	0.25	25
1.77166e-177	0.385429	0.637	0.264	4.12283e-173	Rfx7	EC/EndoC	Two-sided Wilcoxon test	0.25	25
0	0.385165	0.502	0.133	0	Adam17	EC/EndoC	Two-sided Wilcoxon test	0.25	25
2.09448e-100	0.384298	0.999	0.999	4.87407e-96	Hsp90ab1	EC/EndoC	Two-sided Wilcoxon test	0.25	25
5.37561e-132	0.383925	0.763	0.402	1.25096e-127	Kdm1a	EC/EndoC	Two-sided Wilcoxon test	0.25	25
1.39218e-266	0.383801	0.535	0.166	3.23974e-262	Exoc2	EC/EndoC	Two-sided Wilcoxon test	0.25	25
1.40991e-161	0.383736	0.731	0.34	3.28099e-157	Sppl3	EC/EndoC	Two-sided Wilcoxon test	0.25	25
2.68522e-47	0.383168	0.842	0.655	6.24877e-43	Lgals1	EC/EndoC	Two-sided Wilcoxon test	0.25	25
1.33603e-41	0.383142	0.999	0.998	3.10907e-37	mt-Co3	EC/EndoC	Two-sided Wilcoxon test	0.25	25
7.69467e-259	0.382864	0.414	0.108	1.79063e-254	Acyp2	EC/EndoC	Two-sided Wilcoxon test	0.25	25
0	0.38281	0.48	0.106	0	Orai1	EC/EndoC	Two-sided Wilcoxon test	0.25	25
5.77797e-109	0.382745	0.736	0.411	1.34459e-104	Agfg1	EC/EndoC	Two-sided Wilcoxon test	0.25	25
0	0.382625	0.576	0.161	0	Cd151	EC/EndoC	Two-sided Wilcoxon test	0.25	25
8.37646e-90	0.382608	0.875	0.682	1.94929e-85	Bzw1	EC/EndoC	Two-sided Wilcoxon test	0.25	25
7.61966e-173	0.382426	0.685	0.309	1.77317e-168	Ap2b1	EC/EndoC	Two-sided Wilcoxon test	0.25	25
2.00377e-204	0.381858	0.674	0.277	4.66298e-200	H13	EC/EndoC	Two-sided Wilcoxon test	0.25	25
5.72576e-103	0.381639	0.779	0.464	1.33244e-98	Sec11a	EC/EndoC	Two-sided Wilcoxon test	0.25	25
3.9993e-152	0.381313	0.556	0.235	9.30677e-148	AW554918	EC/EndoC	Two-sided Wilcoxon test	0.25	25
0	0.380532	0.483	0.112	0	Tgfb1	EC/EndoC	Two-sided Wilcoxon test	0.25	25
7.73255e-156	0.379934	0.713	0.352	1.79944e-151	Vps36	EC/EndoC	Two-sided Wilcoxon test	0.25	25
0	0.379822	0.406	0.092	0	Plcl2	EC/EndoC	Two-sided Wilcoxon test	0.25	25
1.10164e-196	0.379586	0.632	0.261	2.56362e-192	Pnp	EC/EndoC	Two-sided Wilcoxon test	0.25	25
4.17197e-67	0.379532	0.811	0.598	9.70859e-63	Sf3b5	EC/EndoC	Two-sided Wilcoxon test	0.25	25
2.85269e-57	0.37952	0.636	0.408	6.63849e-53	Pclaf	EC/EndoC	Two-sided Wilcoxon test	0.25	25
2.53074e-181	0.37925	0.668	0.281	5.88928e-177	Tusc3	EC/EndoC	Two-sided Wilcoxon test	0.25	25
4.9785e-232	0.379055	0.548	0.185	1.15855e-227	Map2k5	EC/EndoC	Two-sided Wilcoxon test	0.25	25
8.83009e-251	0.379036	0.519	0.161	2.05485e-246	Tbc1d23	EC/EndoC	Two-sided Wilcoxon test	0.25	25
8.99391e-157	0.378933	0.391	0.135	2.09297e-152	Hist1h2bc	EC/EndoC	Two-sided Wilcoxon test	0.25	25
3.00207e-86	0.378615	0.842	0.615	6.98612e-82	Arf1	EC/EndoC	Two-sided Wilcoxon test	0.25	25
7.47246e-164	0.378573	0.74	0.347	1.73892e-159	Dctn4	EC/EndoC	Two-sided Wilcoxon test	0.25	25
1.45067e-20	0.378235	0.427	0.317	3.37586e-16	Xist	EC/EndoC	Two-sided Wilcoxon test	0.25	25
3.39223e-42	0.377777	0.998	0.994	7.89406e-38	mt-Co1	EC/EndoC	Two-sided Wilcoxon test	0.25	25
1.25358e-236	0.37774	0.567	0.182	2.91722e-232	Ppp1r9a	EC/EndoC	Two-sided Wilcoxon test	0.25	25
6.4294e-202	0.377284	0.541	0.197	1.49619e-197	4932438A13Rik	EC/EndoC	Two-sided Wilcoxon test	0.25	25
5.54954e-177	0.37717	0.655	0.281	1.29143e-172	Xrn1	EC/EndoC	Two-sided Wilcoxon test	0.25	25
1.7755e-115	0.376904	0.816	0.42	4.13177e-111	Hmga2	EC/EndoC	Two-sided Wilcoxon test	0.25	25
1.82267e-275	0.376275	0.492	0.138	4.24153e-271	Tmem176a	EC/EndoC	Two-sided Wilcoxon test	0.25	25
7.01388e-209	0.376085	0.665	0.258	1.6322e-204	Rcn2	EC/EndoC	Two-sided Wilcoxon test	0.25	25
1.39883e-245	0.375972	0.526	0.167	3.25522e-241	Slc38a10	EC/EndoC	Two-sided Wilcoxon test	0.25	25
1.75675e-164	0.37577	0.565	0.228	4.08814e-160	Phlpp1	EC/EndoC	Two-sided Wilcoxon test	0.25	25
1.24739e-142	0.375376	0.782	0.359	2.9028e-138	Cnn3	EC/EndoC	Two-sided Wilcoxon test	0.25	25
2.56352e-223	0.375317	0.624	0.236	5.96558e-219	Rbms2	EC/EndoC	Two-sided Wilcoxon test	0.25	25
4.7314e-42	0.375186	0.938	0.739	1.10104e-37	mt-Nd5	EC/EndoC	Two-sided Wilcoxon test	0.25	25
4.57504e-112	0.374697	0.819	0.455	1.06466e-107	Cpsf6	EC/EndoC	Two-sided Wilcoxon test	0.25	25
3.89897e-296	0.374691	0.44	0.109	9.0733e-292	Cep85l	EC/EndoC	Two-sided Wilcoxon test	0.25	25
0	0.374662	0.388	0.068	0	Eps8	EC/EndoC	Two-sided Wilcoxon test	0.25	25
8.82984e-242	0.373858	0.594	0.207	2.05479e-237	Rad54l2	EC/EndoC	Two-sided Wilcoxon test	0.25	25
3.69341e-169	0.373848	0.745	0.333	8.59493e-165	Nisch	EC/EndoC	Two-sided Wilcoxon test	0.25	25
4.78681e-220	0.373732	0.583	0.211	1.11394e-215	Bach1	EC/EndoC	Two-sided Wilcoxon test	0.25	25
1.16289e-150	0.373691	0.725	0.343	2.70616e-146	Adnp	EC/EndoC	Two-sided Wilcoxon test	0.25	25
2.32194e-263	0.373454	0.414	0.103	5.40338e-259	Prickle2	EC/EndoC	Two-sided Wilcoxon test	0.25	25
5.66401e-120	0.373298	0.69	0.364	1.31807e-115	Myl12b	EC/EndoC	Two-sided Wilcoxon test	0.25	25
2.5401e-203	0.37325	0.571	0.215	5.91107e-199	Eps15l1	EC/EndoC	Two-sided Wilcoxon test	0.25	25
5.07934e-236	0.373214	0.595	0.217	1.18201e-231	Pon2	EC/EndoC	Two-sided Wilcoxon test	0.25	25
3.70308e-169	0.372796	0.667	0.29	8.61744e-165	Smc5	EC/EndoC	Two-sided Wilcoxon test	0.25	25
9.61985e-261	0.372398	0.546	0.162	2.23863e-256	Tcf7l1	EC/EndoC	Two-sided Wilcoxon test	0.25	25
6.3516e-135	0.372387	0.663	0.315	1.47808e-130	Dennd1a	EC/EndoC	Two-sided Wilcoxon test	0.25	25
1.23512e-83	0.37222	0.848	0.58	2.87424e-79	Arglu1	EC/EndoC	Two-sided Wilcoxon test	0.25	25
0	0.371941	0.283	0.037	0	Sema4d	EC/EndoC	Two-sided Wilcoxon test	0.25	25
5.11575e-98	0.371889	0.757	0.455	1.19049e-93	Tbrg1	EC/EndoC	Two-sided Wilcoxon test	0.25	25
0	0.371798	0.349	0.015	0	Sox7	EC/EndoC	Two-sided Wilcoxon test	0.25	25
0	0.371771	0.408	0.06	0	Ifitm3	EC/EndoC	Two-sided Wilcoxon test	0.25	25
4.7621e-296	0.371464	0.494	0.132	1.10819e-291	Il6st	EC/EndoC	Two-sided Wilcoxon test	0.25	25
0	0.371455	0.382	0.054	0	Heph	EC/EndoC	Two-sided Wilcoxon test	0.25	25
8.02146e-139	0.371238	0.692	0.34	1.86667e-134	Babam2	EC/EndoC	Two-sided Wilcoxon test	0.25	25
2.38129e-186	0.371158	0.649	0.26	5.54149e-182	Brwd1	EC/EndoC	Two-sided Wilcoxon test	0.25	25
0	0.37087	0.391	0.058	0	Baiap2	EC/EndoC	Two-sided Wilcoxon test	0.25	25
3.92186e-187	0.370822	0.555	0.21	9.12655e-183	Spred2	EC/EndoC	Two-sided Wilcoxon test	0.25	25
1.44075e-89	0.370778	0.945	0.77	3.35277e-85	Srrm2	EC/EndoC	Two-sided Wilcoxon test	0.25	25
1.12545e-217	0.370393	0.6	0.217	2.61903e-213	Golim4	EC/EndoC	Two-sided Wilcoxon test	0.25	25
1.92671e-196	0.370359	0.662	0.269	4.48364e-192	Wwp1	EC/EndoC	Two-sided Wilcoxon test	0.25	25
0	0.370319	0.452	0.109	0	Lrrc8b	EC/EndoC	Two-sided Wilcoxon test	0.25	25
8.14093e-183	0.370193	0.629	0.261	1.89447e-178	Ints7	EC/EndoC	Two-sided Wilcoxon test	0.25	25
1.53057e-155	0.36994	0.74	0.339	3.56178e-151	Cux1	EC/EndoC	Two-sided Wilcoxon test	0.25	25
0	0.369883	0.442	0.104	0	Mtmr12	EC/EndoC	Two-sided Wilcoxon test	0.25	25
2.57133e-104	0.369803	0.768	0.453	5.98374e-100	Ssr2	EC/EndoC	Two-sided Wilcoxon test	0.25	25
1.25069e-115	0.369422	0.905	0.499	2.91047e-111	Rbpms	EC/EndoC	Two-sided Wilcoxon test	0.25	25
1.45132e-163	0.369328	0.663	0.289	3.37736e-159	Med13	EC/EndoC	Two-sided Wilcoxon test	0.25	25
7.72362e-183	0.369258	0.639	0.265	1.79736e-178	Zfc3h1	EC/EndoC	Two-sided Wilcoxon test	0.25	25
3.04119e-103	0.36909	0.724	0.392	7.07715e-99	Zeb2	EC/EndoC	Two-sided Wilcoxon test	0.25	25
1.69661e-119	0.369088	0.775	0.415	3.94817e-115	Laptm4a	EC/EndoC	Two-sided Wilcoxon test	0.25	25
2.15647e-147	0.368812	0.741	0.369	5.01833e-143	Rab7	EC/EndoC	Two-sided Wilcoxon test	0.25	25
4.60621e-235	0.368673	0.681	0.25	1.07191e-230	Add3	EC/EndoC	Two-sided Wilcoxon test	0.25	25
4.15609e-105	0.368625	0.795	0.465	9.67164e-101	Ube2r2	EC/EndoC	Two-sided Wilcoxon test	0.25	25
0	0.36806	0.448	0.069	0	Mmp2	EC/EndoC	Two-sided Wilcoxon test	0.25	25
4.95342e-105	0.368021	0.739	0.435	1.15271e-100	Capns1	EC/EndoC	Two-sided Wilcoxon test	0.25	25
1.62389e-292	0.367961	0.374	0.081	3.77895e-288	Gem	EC/EndoC	Two-sided Wilcoxon test	0.25	25
2.40827e-171	0.367909	0.641	0.265	5.60429e-167	Scmh1	EC/EndoC	Two-sided Wilcoxon test	0.25	25
1.25389e-85	0.367719	0.851	0.585	2.91794e-81	Morf4l2	EC/EndoC	Two-sided Wilcoxon test	0.25	25
2.67701e-215	0.367663	0.667	0.243	6.22967e-211	Tead2	EC/EndoC	Two-sided Wilcoxon test	0.25	25
2.18981e-212	0.367623	0.557	0.202	5.09592e-208	Cnot10	EC/EndoC	Two-sided Wilcoxon test	0.25	25
2.26293e-142	0.367542	0.68	0.314	5.26607e-138	Zmiz1	EC/EndoC	Two-sided Wilcoxon test	0.25	25
1.92437e-126	0.366174	0.677	0.322	4.47819e-122	Ckb	EC/EndoC	Two-sided Wilcoxon test	0.25	25
7.0965e-173	0.366104	0.656	0.275	1.65143e-168	Myh9	EC/EndoC	Two-sided Wilcoxon test	0.25	25
0	0.365951	0.486	0.117	0	Fgfr1	EC/EndoC	Two-sided Wilcoxon test	0.25	25
8.60806e-113	0.365755	0.705	0.381	2.00318e-108	Hsbp1	EC/EndoC	Two-sided Wilcoxon test	0.25	25
4.47383e-167	0.365401	0.72	0.324	1.0411e-162	Arid1a	EC/EndoC	Two-sided Wilcoxon test	0.25	25
1.24696e-218	0.365235	0.573	0.196	2.9018e-214	Gm1673	EC/EndoC	Two-sided Wilcoxon test	0.25	25
2.3576e-285	0.364724	0.36	0.078	5.48636e-281	Gm49959	EC/EndoC	Two-sided Wilcoxon test	0.25	25
8.79986e-195	0.364517	0.675	0.271	2.04782e-190	Clasp1	EC/EndoC	Two-sided Wilcoxon test	0.25	25
1.20547e-73	0.364322	0.799	0.579	2.80524e-69	Anp32a	EC/EndoC	Two-sided Wilcoxon test	0.25	25
0	0.364128	0.335	0.036	0	Rab27b	EC/EndoC	Two-sided Wilcoxon test	0.25	25
6.18927e-93	0.363824	0.837	0.5	1.44031e-88	Pkn2	EC/EndoC	Two-sided Wilcoxon test	0.25	25
3.91911e-166	0.363434	0.657	0.286	9.12017e-162	Cop1	EC/EndoC	Two-sided Wilcoxon test	0.25	25
0	0.363367	0.401	0.046	0	Foxc2	EC/EndoC	Two-sided Wilcoxon test	0.25	25
1.09731e-153	0.36324	0.738	0.342	2.55355e-149	Yaf2	EC/EndoC	Two-sided Wilcoxon test	0.25	25
0	0.363236	0.404	0.064	0	Cmtm8	EC/EndoC	Two-sided Wilcoxon test	0.25	25
3.22853e-191	0.363196	0.625	0.249	7.51312e-187	Pias2	EC/EndoC	Two-sided Wilcoxon test	0.25	25
2.18492e-161	0.362828	0.638	0.282	5.08453e-157	Klf13	EC/EndoC	Two-sided Wilcoxon test	0.25	25
6.80041e-283	0.362769	0.381	0.085	1.58252e-278	Arhgap26	EC/EndoC	Two-sided Wilcoxon test	0.25	25
2.93263e-178	0.36243	0.488	0.178	6.82452e-174	Nbas	EC/EndoC	Two-sided Wilcoxon test	0.25	25
3.1938e-203	0.362355	0.596	0.226	7.43228e-199	Trip11	EC/EndoC	Two-sided Wilcoxon test	0.25	25
2.31338e-141	0.362279	0.685	0.342	5.38347e-137	Arpc4	EC/EndoC	Two-sided Wilcoxon test	0.25	25
1.40015e-223	0.362164	0.434	0.13	3.2583e-219	Zbtb2	EC/EndoC	Two-sided Wilcoxon test	0.25	25
2.68409e-121	0.361764	0.785	0.42	6.24614e-117	Dhx36	EC/EndoC	Two-sided Wilcoxon test	0.25	25
6.17477e-251	0.361669	0.583	0.193	1.43693e-246	Midn	EC/EndoC	Two-sided Wilcoxon test	0.25	25
5.45914e-290	0.361459	0.444	0.11	1.2704e-285	Arhgap42	EC/EndoC	Two-sided Wilcoxon test	0.25	25
8.96578e-128	0.360715	0.754	0.398	2.08643e-123	Kras	EC/EndoC	Two-sided Wilcoxon test	0.25	25
1.18628e-155	0.360601	0.675	0.31	2.76059e-151	N4bp2	EC/EndoC	Two-sided Wilcoxon test	0.25	25
1.35875e-172	0.360513	0.611	0.251	3.16194e-168	9930021J03Rik	EC/EndoC	Two-sided Wilcoxon test	0.25	25
0	0.360452	0.517	0.119	0	Mapk3	EC/EndoC	Two-sided Wilcoxon test	0.25	25
3.89397e-290	0.360348	0.606	0.185	9.06165e-286	Fam3c	EC/EndoC	Two-sided Wilcoxon test	0.25	25
0	0.359562	0.547	0.145	0	Rab13	EC/EndoC	Two-sided Wilcoxon test	0.25	25
8.08574e-176	0.359507	0.646	0.273	1.88163e-171	Hmgcr	EC/EndoC	Two-sided Wilcoxon test	0.25	25
1.8844e-166	0.359432	0.682	0.298	4.38519e-162	Ambra1	EC/EndoC	Two-sided Wilcoxon test	0.25	25
3.55032e-276	0.359395	0.552	0.162	8.26194e-272	Furin	EC/EndoC	Two-sided Wilcoxon test	0.25	25
3.50264e-138	0.359207	0.721	0.355	8.15099e-134	Qrich1	EC/EndoC	Two-sided Wilcoxon test	0.25	25
7.16693e-175	0.359139	0.586	0.241	1.66782e-170	Rcor1	EC/EndoC	Two-sided Wilcoxon test	0.25	25
2.03395e-117	0.358756	0.771	0.426	4.73322e-113	Rab11b	EC/EndoC	Two-sided Wilcoxon test	0.25	25
1.11297e-201	0.358712	0.471	0.157	2.58999e-197	Hdac8	EC/EndoC	Two-sided Wilcoxon test	0.25	25
1.57899e-140	0.358687	0.617	0.274	3.67447e-136	Daam1	EC/EndoC	Two-sided Wilcoxon test	0.25	25
0	0.358588	0.51	0.128	0	Rras	EC/EndoC	Two-sided Wilcoxon test	0.25	25
0	0.358464	0.447	0.102	0	Txnip	EC/EndoC	Two-sided Wilcoxon test	0.25	25
0	0.358341	0.321	0.053	0	Pappa	EC/EndoC	Two-sided Wilcoxon test	0.25	25
1.27255e-201	0.357869	0.471	0.158	2.96134e-197	Slc10a7	EC/EndoC	Two-sided Wilcoxon test	0.25	25
1.19222e-195	0.357468	0.492	0.173	2.77442e-191	Lmtk2	EC/EndoC	Two-sided Wilcoxon test	0.25	25
4.4351e-104	0.35736	0.818	0.478	1.03209e-99	Cul1	EC/EndoC	Two-sided Wilcoxon test	0.25	25
5.66631e-138	0.35725	0.735	0.357	1.31861e-133	Btbd7	EC/EndoC	Two-sided Wilcoxon test	0.25	25
1.07415e-81	0.357198	0.896	0.609	2.49966e-77	Ube2k	EC/EndoC	Two-sided Wilcoxon test	0.25	25
3.53982e-114	0.35711	0.814	0.454	8.23753e-110	Ppp2r2a	EC/EndoC	Two-sided Wilcoxon test	0.25	25
3.1059e-111	0.356819	0.783	0.433	7.22774e-107	Cdk11b	EC/EndoC	Two-sided Wilcoxon test	0.25	25
0	0.356728	0.54	0.135	0	Hexa	EC/EndoC	Two-sided Wilcoxon test	0.25	25
1.43893e-99	0.356694	0.815	0.48	3.34854e-95	Scaf11	EC/EndoC	Two-sided Wilcoxon test	0.25	25
6.56781e-131	0.356408	0.598	0.275	1.52839e-126	Ncoa2	EC/EndoC	Two-sided Wilcoxon test	0.25	25
2.62531e-209	0.356207	0.535	0.19	6.10937e-205	Mapk14	EC/EndoC	Two-sided Wilcoxon test	0.25	25
1.92288e-137	0.355556	0.709	0.346	4.47472e-133	Ubn2	EC/EndoC	Two-sided Wilcoxon test	0.25	25
4.37774e-184	0.355531	0.567	0.21	1.01874e-179	Hand2	EC/EndoC	Two-sided Wilcoxon test	0.25	25
4.39243e-274	0.355427	0.452	0.121	1.02216e-269	Lyst	EC/EndoC	Two-sided Wilcoxon test	0.25	25
1.04238e-153	0.355421	0.672	0.309	2.42572e-149	Ep400	EC/EndoC	Two-sided Wilcoxon test	0.25	25
7.76003e-190	0.355266	0.636	0.249	1.80584e-185	Trim44	EC/EndoC	Two-sided Wilcoxon test	0.25	25
3.99087e-156	0.355135	0.707	0.31	9.28715e-152	Tsen34	EC/EndoC	Two-sided Wilcoxon test	0.25	25
5.6884e-209	0.354998	0.548	0.194	1.32375e-204	Stam2	EC/EndoC	Two-sided Wilcoxon test	0.25	25
2.29293e-277	0.354731	0.462	0.121	5.33589e-273	Cntln	EC/EndoC	Two-sided Wilcoxon test	0.25	25
1.01899e-83	0.354411	0.853	0.551	2.3713e-79	Xrn2	EC/EndoC	Two-sided Wilcoxon test	0.25	25
3.2598e-120	0.354409	0.722	0.372	7.58587e-116	Ranbp2	EC/EndoC	Two-sided Wilcoxon test	0.25	25
3.79764e-80	0.353719	0.78	0.531	8.83749e-76	Rnf7	EC/EndoC	Two-sided Wilcoxon test	0.25	25
2.4798e-226	0.353089	0.53	0.178	5.77075e-222	Kmt5b	EC/EndoC	Two-sided Wilcoxon test	0.25	25
3.96876e-115	0.35304	0.781	0.431	9.23571e-111	Mettl9	EC/EndoC	Two-sided Wilcoxon test	0.25	25
2.00543e-73	0.352883	0.853	0.573	4.66684e-69	Srsf10	EC/EndoC	Two-sided Wilcoxon test	0.25	25
4.58306e-95	0.352697	0.828	0.503	1.06652e-90	U2surp	EC/EndoC	Two-sided Wilcoxon test	0.25	25
2.08137e-84	0.352668	0.683	0.392	4.84355e-80	Dtl	EC/EndoC	Two-sided Wilcoxon test	0.25	25
1.48333e-110	0.352586	0.793	0.436	3.45185e-106	Chchd3	EC/EndoC	Two-sided Wilcoxon test	0.25	25
0	0.352519	0.348	0.04	0	Rin3	EC/EndoC	Two-sided Wilcoxon test	0.25	25
4.30774e-89	0.352337	0.847	0.534	1.00245e-84	Sec62	EC/EndoC	Two-sided Wilcoxon test	0.25	25
2.98187e-199	0.351789	0.65	0.254	6.93911e-195	Ube4b	EC/EndoC	Two-sided Wilcoxon test	0.25	25
0	0.35175	0.31	0.022	0	Kit	EC/EndoC	Two-sided Wilcoxon test	0.25	25
1.87867e-103	0.351337	0.782	0.428	4.37186e-99	Kmt2c	EC/EndoC	Two-sided Wilcoxon test	0.25	25
1.12985e-151	0.351293	0.675	0.311	2.62927e-147	Itch	EC/EndoC	Two-sided Wilcoxon test	0.25	25
1.71621e-123	0.351203	0.726	0.367	3.99379e-119	Zfp280d	EC/EndoC	Two-sided Wilcoxon test	0.25	25
1.43259e-137	0.351103	0.723	0.352	3.33379e-133	Usp47	EC/EndoC	Two-sided Wilcoxon test	0.25	25
0	0.35094	0.406	0.076	0	Dcbld1	EC/EndoC	Two-sided Wilcoxon test	0.25	25
2.871e-114	0.350795	0.798	0.425	6.6811e-110	Tbl1x	EC/EndoC	Two-sided Wilcoxon test	0.25	25
1.43838e-223	0.350579	0.463	0.141	3.34725e-219	Myo10	EC/EndoC	Two-sided Wilcoxon test	0.25	25
0	0.350486	0.55	0.149	0	Sept9	EC/EndoC	Two-sided Wilcoxon test	0.25	25
9.15217e-250	0.350441	0.465	0.134	2.1298e-245	Bcl2l11	EC/EndoC	Two-sided Wilcoxon test	0.25	25
7.21133e-116	0.350338	0.754	0.424	1.67815e-111	Srp72	EC/EndoC	Two-sided Wilcoxon test	0.25	25
3.13067e-179	0.350119	0.583	0.226	7.28537e-175	Hs2st1	EC/EndoC	Two-sided Wilcoxon test	0.25	25
6.1771e-243	0.35009	0.644	0.217	1.43747e-238	Slc38a4	EC/EndoC	Two-sided Wilcoxon test	0.25	25
1.0422e-139	0.350059	0.586	0.259	2.42531e-135	Chka	EC/EndoC	Two-sided Wilcoxon test	0.25	25
1.41614e-128	0.349803	0.671	0.328	3.29549e-124	Vti1a	EC/EndoC	Two-sided Wilcoxon test	0.25	25
7.89595e-157	0.349752	0.489	0.187	1.83747e-152	Pitpnc1	EC/EndoC	Two-sided Wilcoxon test	0.25	25
1.2094e-153	0.348846	0.69	0.316	2.81439e-149	Tlk2	EC/EndoC	Two-sided Wilcoxon test	0.25	25
2.08724e-262	0.348826	0.531	0.156	4.85723e-258	Sesn3	EC/EndoC	Two-sided Wilcoxon test	0.25	25
4.50131e-261	0.348193	0.547	0.169	1.0475e-256	Casd1	EC/EndoC	Two-sided Wilcoxon test	0.25	25
2.71935e-164	0.34805	0.565	0.235	6.32821e-160	Elf1	EC/EndoC	Two-sided Wilcoxon test	0.25	25
3.95715e-275	0.347865	0.446	0.121	9.20868e-271	Irf2	EC/EndoC	Two-sided Wilcoxon test	0.25	25
6.20721e-131	0.347733	0.622	0.277	1.44448e-126	Ccnd1	EC/EndoC	Two-sided Wilcoxon test	0.25	25
0	0.347659	0.508	0.123	0	Tcaf1	EC/EndoC	Two-sided Wilcoxon test	0.25	25
1.74598e-261	0.347639	0.289	0.056	4.06308e-257	Jazf1	EC/EndoC	Two-sided Wilcoxon test	0.25	25
6.36989e-159	0.347218	0.625	0.267	1.48234e-154	Erc1	EC/EndoC	Two-sided Wilcoxon test	0.25	25
7.58375e-90	0.347115	0.802	0.482	1.76481e-85	Hnrnph1	EC/EndoC	Two-sided Wilcoxon test	0.25	25
9.00223e-179	0.346384	0.572	0.23	2.09491e-174	Hipk1	EC/EndoC	Two-sided Wilcoxon test	0.25	25
0	0.346373	0.518	0.14	0	Stx6	EC/EndoC	Two-sided Wilcoxon test	0.25	25
7.39382e-203	0.346294	0.527	0.187	1.72062e-198	Cep120	EC/EndoC	Two-sided Wilcoxon test	0.25	25
2.16872e-120	0.346136	0.609	0.293	5.04682e-116	Spata5	EC/EndoC	Two-sided Wilcoxon test	0.25	25
7.70171e-172	0.345892	0.66	0.28	1.79226e-167	Golgb1	EC/EndoC	Two-sided Wilcoxon test	0.25	25
7.55095e-71	0.345751	0.876	0.662	1.75718e-66	Calr	EC/EndoC	Two-sided Wilcoxon test	0.25	25
1.87796e-231	0.345702	0.498	0.16	4.37021e-227	Fbxw8	EC/EndoC	Two-sided Wilcoxon test	0.25	25
1.18576e-60	0.345358	0.947	0.886	2.75939e-56	Ndufa4	EC/EndoC	Two-sided Wilcoxon test	0.25	25
1.86755e-150	0.345283	0.742	0.362	4.34598e-146	Rab1a	EC/EndoC	Two-sided Wilcoxon test	0.25	25
0	0.345168	0.514	0.126	0	Eva1b	EC/EndoC	Two-sided Wilcoxon test	0.25	25
2.95449e-194	0.345119	0.585	0.228	6.8754e-190	Senp5	EC/EndoC	Two-sided Wilcoxon test	0.25	25
3.69435e-68	0.344823	0.352	0.164	8.59712e-64	Epha7	EC/EndoC	Two-sided Wilcoxon test	0.25	25
2.55837e-165	0.344746	0.65	0.286	5.95357e-161	Ppp2r5c	EC/EndoC	Two-sided Wilcoxon test	0.25	25
2.40909e-120	0.344571	0.769	0.405	5.6062e-116	Akap9	EC/EndoC	Two-sided Wilcoxon test	0.25	25
2.26946e-96	0.344555	0.773	0.465	5.28127e-92	Capza2	EC/EndoC	Two-sided Wilcoxon test	0.25	25
6.29939e-127	0.344462	0.767	0.393	1.46593e-122	Ddx50	EC/EndoC	Two-sided Wilcoxon test	0.25	25
1.8469e-152	0.344435	0.659	0.298	4.29791e-148	Fam13b	EC/EndoC	Two-sided Wilcoxon test	0.25	25
0	0.344395	0.4	0.071	0	Bgn	EC/EndoC	Two-sided Wilcoxon test	0.25	25
0	0.344359	0.529	0.141	0	Mgat4b	EC/EndoC	Two-sided Wilcoxon test	0.25	25
5.97294e-77	0.344277	0.934	0.83	1.38996e-72	Ddx5	EC/EndoC	Two-sided Wilcoxon test	0.25	25
0	0.344113	0.36	0.015	0	Scarf1	EC/EndoC	Two-sided Wilcoxon test	0.25	25
0	0.343934	0.258	0.034	0	Igfbp3	EC/EndoC	Two-sided Wilcoxon test	0.25	25
9.09708e-148	0.343908	0.624	0.279	2.11698e-143	Arid2	EC/EndoC	Two-sided Wilcoxon test	0.25	25
9.40264e-195	0.34369	0.636	0.257	2.18809e-190	Sec22b	EC/EndoC	Two-sided Wilcoxon test	0.25	25
0	0.343515	0.325	0.023	0	Entpd1	EC/EndoC	Two-sided Wilcoxon test	0.25	25
3.41942e-290	0.343244	0.462	0.12	7.95733e-286	Mxd4	EC/EndoC	Two-sided Wilcoxon test	0.25	25
0	0.343235	0.556	0.159	0	Pwwp3a	EC/EndoC	Two-sided Wilcoxon test	0.25	25
1.74842e-45	0.343102	0.999	0.999	4.06875e-41	Actb	EC/EndoC	Two-sided Wilcoxon test	0.25	25
1.80701e-73	0.34255	0.881	0.569	4.20509e-69	Ncor1	EC/EndoC	Two-sided Wilcoxon test	0.25	25
1.06108e-268	0.342359	0.46	0.124	2.46923e-264	Emp3	EC/EndoC	Two-sided Wilcoxon test	0.25	25
8.98594e-193	0.342309	0.568	0.215	2.09112e-188	Dnajc13	EC/EndoC	Two-sided Wilcoxon test	0.25	25
6.58116e-79	0.342155	0.868	0.582	1.5315e-74	Fubp1	EC/EndoC	Two-sided Wilcoxon test	0.25	25
1.14687e-49	0.34215	0.899	0.625	2.66889e-45	mt-Nd4l	EC/EndoC	Two-sided Wilcoxon test	0.25	25
1.8382e-212	0.341523	0.561	0.201	4.27768e-208	Tet3	EC/EndoC	Two-sided Wilcoxon test	0.25	25
2.96419e-185	0.341509	0.568	0.228	6.89797e-181	Smap2	EC/EndoC	Two-sided Wilcoxon test	0.25	25
4.97121e-97	0.341385	0.809	0.464	1.15685e-92	Dpm1	EC/EndoC	Two-sided Wilcoxon test	0.25	25
0	0.341159	0.459	0.09	0	Pdia5	EC/EndoC	Two-sided Wilcoxon test	0.25	25
4.81306e-181	0.341096	0.58	0.23	1.12005e-176	Cnot6l	EC/EndoC	Two-sided Wilcoxon test	0.25	25
0	0.34067	0.37	0.022	0	Gimap1	EC/EndoC	Two-sided Wilcoxon test	0.25	25
2.63979e-81	0.340644	0.78	0.514	6.14307e-77	Arpc5	EC/EndoC	Two-sided Wilcoxon test	0.25	25
2.19194e-151	0.340515	0.644	0.295	5.10085e-147	Rnf216	EC/EndoC	Two-sided Wilcoxon test	0.25	25
4.48683e-219	0.340377	0.64	0.241	1.04413e-214	Akt1	EC/EndoC	Two-sided Wilcoxon test	0.25	25
2.60487e-112	0.339707	0.748	0.396	6.0618e-108	Ube2h	EC/EndoC	Two-sided Wilcoxon test	0.25	25
0	0.339384	0.29	0.033	0	Spag6l	EC/EndoC	Two-sided Wilcoxon test	0.25	25
3.10566e-78	0.339342	0.847	0.592	7.22719e-74	Rbbp4	EC/EndoC	Two-sided Wilcoxon test	0.25	25
[truncated: 12,097 more rows]

## Sheet: Fig3f
Supplementary Data 1. Marker expression in different cardiac cell populations from control and Isl1cre/+Rnf20fl/fl embryos.
p_val	avg_log2FC	pct.1	pct.2	p_val_adj	gene	CELL_TYPE	Test_used	fc.threshold (log2)	min.pct (%)
3.18095e-49	1.40845	0.963	0.711	7.4024e-45	Mpped2	vCM1	Two-sided Wilcoxon test	0.25	25
5.08499e-47	1.35653	0.86	0.502	1.18333e-42	Tln2	vCM1	Two-sided Wilcoxon test	0.25	25
1.22484e-41	1.25063	0.963	0.691	2.85033e-37	Arhgap6	vCM1	Two-sided Wilcoxon test	0.25	25
3.02893e-40	1.10879	0.958	0.797	7.04862e-36	Igf1r	vCM1	Two-sided Wilcoxon test	0.25	25
3.54711e-40	0.996675	0.991	0.859	8.25448e-36	Magi1	vCM1	Two-sided Wilcoxon test	0.25	25
6.46826e-40	1.13695	0.847	0.58	1.50523e-35	Phlpp1	vCM1	Two-sided Wilcoxon test	0.25	25
2.59083e-36	0.980621	0.972	0.811	6.02913e-32	Pcdh7	vCM1	Two-sided Wilcoxon test	0.25	25
1.29479e-35	1.22143	0.926	0.725	3.0131e-31	Sdk1	vCM1	Two-sided Wilcoxon test	0.25	25
1.76151e-35	1.04738	0.967	0.803	4.0992e-31	Auts2	vCM1	Two-sided Wilcoxon test	0.25	25
3.39982e-35	1.09778	0.535	0.189	7.91171e-31	Fyb2	vCM1	Two-sided Wilcoxon test	0.25	25
9.15516e-35	0.884154	0.93	0.787	2.1305e-30	Stag1	vCM1	Two-sided Wilcoxon test	0.25	25
4.55037e-34	1.07034	0.707	0.376	1.05892e-29	Pycard	vCM1	Two-sided Wilcoxon test	0.25	25
4.912e-34	0.890568	0.995	0.914	1.14307e-29	Ryr2	vCM1	Two-sided Wilcoxon test	0.25	25
8.73802e-34	1.17405	1	0.978	2.03342e-29	mt-Nd1	vCM1	Two-sided Wilcoxon test	0.25	25
1.03832e-33	1.03076	0.619	0.255	2.41628e-29	Prdm16	vCM1	Two-sided Wilcoxon test	0.25	25
1.04538e-33	1.24896	0.981	0.971	2.4327e-29	mt-Nd2	vCM1	Two-sided Wilcoxon test	0.25	25
2.50387e-33	1.16902	0.744	0.434	5.82675e-29	Efna5	vCM1	Two-sided Wilcoxon test	0.25	25
2.63737e-33	0.896308	0.981	0.811	6.13743e-29	Rere	vCM1	Two-sided Wilcoxon test	0.25	25
3.16396e-32	1.20161	0.935	0.861	7.36284e-28	mt-Nd3	vCM1	Two-sided Wilcoxon test	0.25	25
1.99954e-31	1.00382	0.87	0.593	4.65314e-27	Alcam	vCM1	Two-sided Wilcoxon test	0.25	25
2.98992e-31	0.995743	0.981	0.837	6.95784e-27	Cacna1c	vCM1	Two-sided Wilcoxon test	0.25	25
3.19065e-31	0.938527	0.935	0.771	7.42497e-27	Zfpm2	vCM1	Two-sided Wilcoxon test	0.25	25
4.03963e-31	0.949078	0.963	0.874	9.40062e-27	Erbb4	vCM1	Two-sided Wilcoxon test	0.25	25
6.89279e-31	0.862696	0.8	0.552	1.60402e-26	Tle4	vCM1	Two-sided Wilcoxon test	0.25	25
9.52276e-31	0.88571	0.981	0.852	2.21604e-26	Sorbs2	vCM1	Two-sided Wilcoxon test	0.25	25
1.81687e-30	1.12975	0.995	0.976	4.22804e-26	mt-Nd4	vCM1	Two-sided Wilcoxon test	0.25	25
1.89531e-30	0.773585	0.926	0.697	4.41059e-26	Setbp1	vCM1	Two-sided Wilcoxon test	0.25	25
9.14583e-30	0.879652	0.916	0.757	2.12833e-25	Chd7	vCM1	Two-sided Wilcoxon test	0.25	25
1.17048e-29	0.731224	0.986	0.903	2.72383e-25	Qk	vCM1	Two-sided Wilcoxon test	0.25	25
2.66703e-29	0.858687	0.921	0.767	6.20644e-25	Pard3	vCM1	Two-sided Wilcoxon test	0.25	25
4.74584e-29	1.05728	1	0.992	1.1044e-24	mt-Co2	vCM1	Two-sided Wilcoxon test	0.25	25
4.95488e-29	0.827342	0.888	0.696	1.15305e-24	Kmt2c	vCM1	Two-sided Wilcoxon test	0.25	25
8.13933e-29	0.837361	0.995	0.844	1.8941e-24	Cacnb2	vCM1	Two-sided Wilcoxon test	0.25	25
1.21245e-28	1.13955	0.953	0.895	2.82149e-24	mt-Nd5	vCM1	Two-sided Wilcoxon test	0.25	25
1.22227e-28	1.1187	0.674	0.357	2.84434e-24	Unc13c	vCM1	Two-sided Wilcoxon test	0.25	25
3.45985e-28	1.02478	1	0.994	8.05142e-24	mt-Atp6	vCM1	Two-sided Wilcoxon test	0.25	25
5.2546e-28	0.822085	0.944	0.789	1.2228e-23	Rbm20	vCM1	Two-sided Wilcoxon test	0.25	25
1.597e-27	0.703414	0.972	0.825	3.71637e-23	Tead1	vCM1	Two-sided Wilcoxon test	0.25	25
2.96926e-27	0.886123	0.819	0.59	6.90976e-23	Trio	vCM1	Two-sided Wilcoxon test	0.25	25
4.30891e-27	0.945851	0.995	0.998	1.00273e-22	mt-Co3	vCM1	Two-sided Wilcoxon test	0.25	25
7.7292e-27	0.987421	0.995	0.977	1.79866e-22	mt-Cytb	vCM1	Two-sided Wilcoxon test	0.25	25
1.68522e-26	0.852788	0.865	0.669	3.92168e-22	Nfib	vCM1	Two-sided Wilcoxon test	0.25	25
3.93106e-26	0.813059	0.786	0.563	9.14797e-22	Zfp609	vCM1	Two-sided Wilcoxon test	0.25	25
4.15845e-26	1.01567	0.874	0.737	9.67712e-22	Exoc4	vCM1	Two-sided Wilcoxon test	0.25	25
6.50827e-26	0.814384	0.907	0.719	1.51454e-21	Kcnq1ot1	vCM1	Two-sided Wilcoxon test	0.25	25
7.94598e-26	0.746176	0.912	0.746	1.84911e-21	Ankrd17	vCM1	Two-sided Wilcoxon test	0.25	25
9.37009e-26	0.753148	0.926	0.776	2.18051e-21	Chd2	vCM1	Two-sided Wilcoxon test	0.25	25
1.80448e-25	0.781607	0.86	0.659	4.19921e-21	Jmjd1c	vCM1	Two-sided Wilcoxon test	0.25	25
2.51486e-25	0.74766	0.73	0.441	5.85232e-21	Arhgap32	vCM1	Two-sided Wilcoxon test	0.25	25
3.00885e-25	0.823892	0.898	0.752	7.00189e-21	Kansl1	vCM1	Two-sided Wilcoxon test	0.25	25
3.41867e-25	0.800973	0.926	0.734	7.95559e-21	Magi3	vCM1	Two-sided Wilcoxon test	0.25	25
3.65367e-25	1.03995	0.907	0.822	8.50246e-21	mt-Nd4l	vCM1	Two-sided Wilcoxon test	0.25	25
4.49018e-25	1.04957	0.726	0.454	1.04491e-20	Pola1	vCM1	Two-sided Wilcoxon test	0.25	25
7.8635e-25	0.79726	0.86	0.72	1.82991e-20	Gphn	vCM1	Two-sided Wilcoxon test	0.25	25
1.02938e-24	0.794382	0.781	0.552	2.39548e-20	Mcc	vCM1	Two-sided Wilcoxon test	0.25	25
1.7096e-24	0.72446	0.326	0.09	3.97841e-20	Il12rb2	vCM1	Two-sided Wilcoxon test	0.25	25
2.94207e-24	0.927996	0.926	0.828	6.84649e-20	Pakap.1	vCM1	Two-sided Wilcoxon test	0.25	25
3.56781e-24	0.740172	0.921	0.797	8.30264e-20	Pbx1	vCM1	Two-sided Wilcoxon test	0.25	25
8.13304e-24	0.856959	0.916	0.734	1.89264e-19	Pde4d	vCM1	Two-sided Wilcoxon test	0.25	25
8.34021e-24	1.05652	0.837	0.57	1.94085e-19	Kcnh7	vCM1	Two-sided Wilcoxon test	0.25	25
1.75396e-23	0.682524	0.87	0.691	4.08165e-19	Dyrk1a	vCM1	Two-sided Wilcoxon test	0.25	25
7.04573e-23	0.812792	0.637	0.369	1.63961e-18	Brip1os	vCM1	Two-sided Wilcoxon test	0.25	25
7.34331e-23	0.798985	0.633	0.336	1.70886e-18	Map3k5	vCM1	Two-sided Wilcoxon test	0.25	25
1.26012e-22	0.833975	1	0.993	2.93243e-18	mt-Co1	vCM1	Two-sided Wilcoxon test	0.25	25
1.70585e-22	0.967301	0.674	0.428	3.96968e-18	Atad2	vCM1	Two-sided Wilcoxon test	0.25	25
2.21507e-22	0.779641	0.456	0.186	5.15468e-18	Frem1	vCM1	Two-sided Wilcoxon test	0.25	25
2.43288e-22	0.798678	0.805	0.601	5.66155e-18	Zfp407	vCM1	Two-sided Wilcoxon test	0.25	25
3.14644e-22	0.699095	0.921	0.765	7.32209e-18	Tcf12	vCM1	Two-sided Wilcoxon test	0.25	25
4.15741e-22	0.840771	0.847	0.689	9.67471e-18	Meis2	vCM1	Two-sided Wilcoxon test	0.25	25
6.92987e-22	0.763118	0.721	0.453	1.61265e-17	P3h2	vCM1	Two-sided Wilcoxon test	0.25	25
1.09896e-21	0.659625	0.907	0.8	2.55739e-17	Usp34	vCM1	Two-sided Wilcoxon test	0.25	25
1.17172e-21	1.04694	0.707	0.481	2.72671e-17	Diaph3	vCM1	Two-sided Wilcoxon test	0.25	25
1.51733e-21	0.614978	0.949	0.824	3.53098e-17	Enah	vCM1	Two-sided Wilcoxon test	0.25	25
1.54218e-21	0.748626	1	0.967	3.58882e-17	Ttn	vCM1	Two-sided Wilcoxon test	0.25	25
1.58489e-21	0.711626	0.819	0.659	3.6882e-17	Cnot1	vCM1	Two-sided Wilcoxon test	0.25	25
1.87179e-21	0.702699	0.837	0.682	4.35584e-17	Ubr5	vCM1	Two-sided Wilcoxon test	0.25	25
2.2966e-21	0.792241	0.916	0.715	5.34442e-17	Kcnq5	vCM1	Two-sided Wilcoxon test	0.25	25
2.77248e-21	0.793106	0.842	0.723	6.45183e-17	Tlk1	vCM1	Two-sided Wilcoxon test	0.25	25
3.21023e-21	0.781956	0.851	0.69	7.47052e-17	Meis1	vCM1	Two-sided Wilcoxon test	0.25	25
4.10084e-21	0.784304	0.749	0.561	9.54306e-17	Fto	vCM1	Two-sided Wilcoxon test	0.25	25
8.24359e-21	0.686	0.874	0.729	1.91837e-16	Ext1	vCM1	Two-sided Wilcoxon test	0.25	25
9.5601e-21	0.727006	0.651	0.417	2.22473e-16	Spidr	vCM1	Two-sided Wilcoxon test	0.25	25
1.00637e-20	0.83031	0.674	0.436	2.34193e-16	Dtl	vCM1	Two-sided Wilcoxon test	0.25	25
1.21363e-20	0.888846	0.735	0.526	2.82425e-16	mt-Atp8	vCM1	Two-sided Wilcoxon test	0.25	25
1.24377e-20	0.708695	0.833	0.652	2.89438e-16	Snd1	vCM1	Two-sided Wilcoxon test	0.25	25
1.34436e-20	0.640419	0.865	0.662	3.12846e-16	Ptprk	vCM1	Two-sided Wilcoxon test	0.25	25
3.17538e-20	0.742357	0.772	0.595	7.38942e-16	Med13	vCM1	Two-sided Wilcoxon test	0.25	25
4.25347e-20	0.676113	0.74	0.505	9.89824e-16	Zfp827	vCM1	Two-sided Wilcoxon test	0.25	25
5.23454e-20	0.706531	0.847	0.676	1.21813e-15	Dpf3	vCM1	Two-sided Wilcoxon test	0.25	25
5.63513e-20	0.543988	0.953	0.875	1.31135e-15	Ppp1r12a	vCM1	Two-sided Wilcoxon test	0.25	25
1.70893e-19	0.691746	0.735	0.526	3.97685e-15	Slc25a13	vCM1	Two-sided Wilcoxon test	0.25	25
1.7145e-19	0.737527	0.758	0.563	3.98981e-15	Kdm6a	vCM1	Two-sided Wilcoxon test	0.25	25
1.74674e-19	0.907783	0.651	0.423	4.06484e-15	Gm26917	vCM1	Two-sided Wilcoxon test	0.25	25
2.43383e-19	0.728411	0.698	0.509	5.66376e-15	Ankrd28	vCM1	Two-sided Wilcoxon test	0.25	25
2.77696e-19	0.701017	0.767	0.625	6.46227e-15	Larp4b	vCM1	Two-sided Wilcoxon test	0.25	25
3.44271e-19	0.697824	0.916	0.769	8.01154e-15	Tanc2	vCM1	Two-sided Wilcoxon test	0.25	25
4.18255e-19	0.710337	0.767	0.6	9.73321e-15	Casz1	vCM1	Two-sided Wilcoxon test	0.25	25
4.26711e-19	0.701687	0.744	0.53	9.93e-15	Ror2	vCM1	Two-sided Wilcoxon test	0.25	25
4.57789e-19	0.738125	0.623	0.373	1.06532e-14	Cobll1	vCM1	Two-sided Wilcoxon test	0.25	25
6.81706e-19	0.653577	0.8	0.681	1.5864e-14	Smchd1	vCM1	Two-sided Wilcoxon test	0.25	25
7.30242e-19	0.668501	0.753	0.601	1.69935e-14	Smg1	vCM1	Two-sided Wilcoxon test	0.25	25
7.887e-19	0.503198	0.298	0.092	1.83538e-14	Pgpep1l	vCM1	Two-sided Wilcoxon test	0.25	25
8.58872e-19	0.777832	0.614	0.351	1.99868e-14	Gm15261	vCM1	Two-sided Wilcoxon test	0.25	25
8.95996e-19	0.562173	0.967	0.864	2.08507e-14	Msi2	vCM1	Two-sided Wilcoxon test	0.25	25
9.83918e-19	0.657199	0.772	0.579	2.28968e-14	Fgfr2	vCM1	Two-sided Wilcoxon test	0.25	25
1.23696e-18	0.616397	0.805	0.661	2.87853e-14	Stt3b	vCM1	Two-sided Wilcoxon test	0.25	25
1.47892e-18	0.792036	0.609	0.371	3.4416e-14	Prdm6	vCM1	Two-sided Wilcoxon test	0.25	25
1.55881e-18	0.694658	0.549	0.306	3.62751e-14	Taco1	vCM1	Two-sided Wilcoxon test	0.25	25
1.64837e-18	0.704339	0.623	0.4	3.83592e-14	Cplane1	vCM1	Two-sided Wilcoxon test	0.25	25
2.03873e-18	0.749453	0.758	0.587	4.74433e-14	Cdkal1	vCM1	Two-sided Wilcoxon test	0.25	25
2.21399e-18	0.575995	0.851	0.661	5.15217e-14	Dst	vCM1	Two-sided Wilcoxon test	0.25	25
3.11012e-18	0.765106	0.833	0.697	7.23756e-14	Kif26b	vCM1	Two-sided Wilcoxon test	0.25	25
3.22581e-18	0.591119	0.898	0.765	7.50678e-14	Ankrd11	vCM1	Two-sided Wilcoxon test	0.25	25
3.45524e-18	0.529687	0.916	0.765	8.0407e-14	Tbl1x	vCM1	Two-sided Wilcoxon test	0.25	25
4.98131e-18	0.692022	0.73	0.539	1.1592e-13	Rptor	vCM1	Two-sided Wilcoxon test	0.25	25
5.05947e-18	0.564913	0.86	0.69	1.17739e-13	Asap1	vCM1	Two-sided Wilcoxon test	0.25	25
5.06138e-18	0.539986	0.721	0.503	1.17783e-13	Ep400	vCM1	Two-sided Wilcoxon test	0.25	25
5.87482e-18	0.5286	0.93	0.799	1.36713e-13	Zfp644	vCM1	Two-sided Wilcoxon test	0.25	25
7.68408e-18	0.704075	0.744	0.553	1.78816e-13	Vps13b	vCM1	Two-sided Wilcoxon test	0.25	25
9.05475e-18	0.52724	0.372	0.141	2.10713e-13	Tox2	vCM1	Two-sided Wilcoxon test	0.25	25
1.00869e-17	0.677417	0.721	0.559	2.34732e-13	Rictor	vCM1	Two-sided Wilcoxon test	0.25	25
1.17524e-17	0.579888	0.87	0.742	2.7349e-13	Pum1	vCM1	Two-sided Wilcoxon test	0.25	25
1.4203e-17	0.716915	0.447	0.223	3.30518e-13	Bahcc1	vCM1	Two-sided Wilcoxon test	0.25	25
1.4316e-17	0.576644	0.809	0.645	3.33147e-13	Gnaq	vCM1	Two-sided Wilcoxon test	0.25	25
1.58746e-17	0.698077	0.809	0.739	3.69418e-13	Mllt10	vCM1	Two-sided Wilcoxon test	0.25	25
2.07059e-17	0.617639	0.86	0.775	4.81847e-13	Huwe1	vCM1	Two-sided Wilcoxon test	0.25	25
2.25518e-17	0.616518	0.772	0.592	5.24803e-13	Wdfy3	vCM1	Two-sided Wilcoxon test	0.25	25
3.90262e-17	0.543113	0.851	0.68	9.08179e-13	Mtss1	vCM1	Two-sided Wilcoxon test	0.25	25
5.6188e-17	0.702771	0.726	0.532	1.30755e-12	Tbc1d5	vCM1	Two-sided Wilcoxon test	0.25	25
5.66776e-17	0.681775	0.777	0.573	1.31894e-12	5330438D12Rik	vCM1	Two-sided Wilcoxon test	0.25	25
5.85285e-17	0.597521	0.753	0.585	1.36202e-12	Arid1a	vCM1	Two-sided Wilcoxon test	0.25	25
6.13747e-17	0.766099	0.786	0.588	1.42825e-12	Pde4b	vCM1	Two-sided Wilcoxon test	0.25	25
7.39456e-17	0.757451	0.693	0.498	1.72079e-12	Znrf3	vCM1	Two-sided Wilcoxon test	0.25	25
7.4674e-17	0.56036	0.893	0.779	1.73774e-12	Arih1	vCM1	Two-sided Wilcoxon test	0.25	25
7.56661e-17	0.6513	0.688	0.503	1.76083e-12	Pou2f1	vCM1	Two-sided Wilcoxon test	0.25	25
8.71379e-17	0.83498	0.6	0.374	2.02779e-12	Creb5	vCM1	Two-sided Wilcoxon test	0.25	25
9.1152e-17	0.733633	0.726	0.54	2.1212e-12	Pard3b	vCM1	Two-sided Wilcoxon test	0.25	25
1.04767e-16	0.568553	0.66	0.448	2.43804e-12	Scaf4	vCM1	Two-sided Wilcoxon test	0.25	25
1.09623e-16	0.586098	0.674	0.467	2.55105e-12	Col4a2	vCM1	Two-sided Wilcoxon test	0.25	25
1.20302e-16	0.631796	0.823	0.739	2.79954e-12	Birc6	vCM1	Two-sided Wilcoxon test	0.25	25
1.22251e-16	0.522867	0.912	0.84	2.84489e-12	Son	vCM1	Two-sided Wilcoxon test	0.25	25
1.25822e-16	0.569292	0.805	0.643	2.92799e-12	Braf	vCM1	Two-sided Wilcoxon test	0.25	25
1.33345e-16	0.587361	0.744	0.588	3.10307e-12	Ppp6r3	vCM1	Two-sided Wilcoxon test	0.25	25
1.74752e-16	0.727619	0.628	0.422	4.06666e-12	Myo5a	vCM1	Two-sided Wilcoxon test	0.25	25
1.75907e-16	0.601564	0.874	0.765	4.09353e-12	Stk39	vCM1	Two-sided Wilcoxon test	0.25	25
2.17317e-16	0.490586	0.944	0.857	5.05719e-12	Sptbn1	vCM1	Two-sided Wilcoxon test	0.25	25
2.61925e-16	0.693315	0.726	0.574	6.09525e-12	Lcorl	vCM1	Two-sided Wilcoxon test	0.25	25
2.85973e-16	0.565754	0.898	0.781	6.65487e-12	Samd4	vCM1	Two-sided Wilcoxon test	0.25	25
3.58946e-16	0.735949	0.712	0.523	8.35303e-12	Ptprg	vCM1	Two-sided Wilcoxon test	0.25	25
4.12631e-16	0.583382	0.358	0.143	9.60234e-12	Pcsk6	vCM1	Two-sided Wilcoxon test	0.25	25
4.48593e-16	0.811662	0.572	0.353	1.04392e-11	Rad51b	vCM1	Two-sided Wilcoxon test	0.25	25
4.52917e-16	0.65653	0.614	0.367	1.05398e-11	Akap6	vCM1	Two-sided Wilcoxon test	0.25	25
4.56522e-16	0.552134	0.344	0.138	1.06237e-11	Brip1	vCM1	Two-sided Wilcoxon test	0.25	25
4.96401e-16	0.47505	0.953	0.817	1.15517e-11	Celf2	vCM1	Two-sided Wilcoxon test	0.25	25
5.70804e-16	0.681524	0.591	0.365	1.32832e-11	Sorbs2os	vCM1	Two-sided Wilcoxon test	0.25	25
5.86393e-16	0.708404	0.66	0.432	1.36459e-11	Lrrc4	vCM1	Two-sided Wilcoxon test	0.25	25
6.59378e-16	0.55135	0.953	0.854	1.53444e-11	Pakap	vCM1	Two-sided Wilcoxon test	0.25	25
6.66662e-16	0.589705	0.8	0.656	1.55139e-11	Kif13a	vCM1	Two-sided Wilcoxon test	0.25	25
1.07665e-15	0.640212	0.795	0.662	2.50547e-11	Rapgef6	vCM1	Two-sided Wilcoxon test	0.25	25
1.1219e-15	0.804666	0.674	0.497	2.61077e-11	Abtb2	vCM1	Two-sided Wilcoxon test	0.25	25
1.17793e-15	0.833766	0.716	0.523	2.74115e-11	Gpc6	vCM1	Two-sided Wilcoxon test	0.25	25
1.24326e-15	0.584723	0.66	0.456	2.89319e-11	Adamts9	vCM1	Two-sided Wilcoxon test	0.25	25
1.45066e-15	0.623053	0.772	0.638	3.37583e-11	Dip2b	vCM1	Two-sided Wilcoxon test	0.25	25
1.52228e-15	0.681295	0.726	0.551	3.5425e-11	Sf3b3	vCM1	Two-sided Wilcoxon test	0.25	25
1.74664e-15	0.468804	0.926	0.857	4.0646e-11	Macf1	vCM1	Two-sided Wilcoxon test	0.25	25
2.00352e-15	0.655538	0.707	0.577	4.66239e-11	Nsd2	vCM1	Two-sided Wilcoxon test	0.25	25
2.12129e-15	0.626375	0.74	0.528	4.93645e-11	Nfia	vCM1	Two-sided Wilcoxon test	0.25	25
2.18001e-15	0.531042	0.856	0.725	5.07311e-11	Nipbl	vCM1	Two-sided Wilcoxon test	0.25	25
2.37625e-15	0.581269	0.86	0.698	5.52978e-11	Fndc3b	vCM1	Two-sided Wilcoxon test	0.25	25
2.4528e-15	0.556647	0.851	0.753	5.70791e-11	Nsd1	vCM1	Two-sided Wilcoxon test	0.25	25
2.75828e-15	0.682269	0.679	0.514	6.41879e-11	Arid2	vCM1	Two-sided Wilcoxon test	0.25	25
2.8392e-15	0.621035	0.753	0.625	6.60711e-11	Scaf8	vCM1	Two-sided Wilcoxon test	0.25	25
2.94048e-15	0.584959	0.809	0.644	6.8428e-11	Ppp1r12b	vCM1	Two-sided Wilcoxon test	0.25	25
4.19515e-15	0.616432	0.87	0.746	9.76252e-11	Fhod3	vCM1	Two-sided Wilcoxon test	0.25	25
4.54797e-15	0.547575	0.628	0.42	1.05836e-10	Hspg2	vCM1	Two-sided Wilcoxon test	0.25	25
5.33852e-15	0.604285	0.721	0.57	1.24233e-10	Asxl1	vCM1	Two-sided Wilcoxon test	0.25	25
5.77426e-15	0.677988	0.558	0.358	1.34373e-10	E2f3	vCM1	Two-sided Wilcoxon test	0.25	25
7.16564e-15	0.462078	0.995	0.947	1.66752e-10	Slc8a1	vCM1	Two-sided Wilcoxon test	0.25	25
7.31868e-15	0.549109	0.865	0.789	1.70313e-10	Rbfox2	vCM1	Two-sided Wilcoxon test	0.25	25
7.32703e-15	0.508915	0.902	0.859	1.70507e-10	Adk	vCM1	Two-sided Wilcoxon test	0.25	25
7.41921e-15	0.784303	0.66	0.425	1.72652e-10	Fstl4	vCM1	Two-sided Wilcoxon test	0.25	25
7.87395e-15	0.646107	0.767	0.655	1.83235e-10	Ecpas	vCM1	Two-sided Wilcoxon test	0.25	25
8.46505e-15	0.631956	0.698	0.557	1.9699e-10	Nsd3	vCM1	Two-sided Wilcoxon test	0.25	25
9.15051e-15	0.40869	0.991	0.915	2.12942e-10	Airn	vCM1	Two-sided Wilcoxon test	0.25	25
1.00695e-14	0.64015	0.86	0.768	2.34328e-10	Wnk1	vCM1	Two-sided Wilcoxon test	0.25	25
1.01235e-14	0.442804	0.377	0.162	2.35584e-10	Slc16a4	vCM1	Two-sided Wilcoxon test	0.25	25
1.26985e-14	0.558774	0.707	0.529	2.95508e-10	Rev1	vCM1	Two-sided Wilcoxon test	0.25	25
1.36843e-14	0.523724	0.86	0.771	3.18447e-10	Srek1	vCM1	Two-sided Wilcoxon test	0.25	25
1.37883e-14	0.586198	0.73	0.57	3.20868e-10	1700025G04Rik	vCM1	Two-sided Wilcoxon test	0.25	25
1.45579e-14	0.690056	0.679	0.531	3.38778e-10	Xpo7	vCM1	Two-sided Wilcoxon test	0.25	25
1.61227e-14	0.57208	0.767	0.587	3.75191e-10	Ubr3	vCM1	Two-sided Wilcoxon test	0.25	25
1.65291e-14	0.562322	0.8	0.662	3.84649e-10	Mical3	vCM1	Two-sided Wilcoxon test	0.25	25
1.66099e-14	0.546142	0.912	0.813	3.86529e-10	Cdh2	vCM1	Two-sided Wilcoxon test	0.25	25
1.70307e-14	0.470695	0.893	0.756	3.9632e-10	Baz2b	vCM1	Two-sided Wilcoxon test	0.25	25
1.7166e-14	0.620183	0.763	0.604	3.9947e-10	Dip2c	vCM1	Two-sided Wilcoxon test	0.25	25
1.78897e-14	0.588436	0.795	0.652	4.16311e-10	Mycbp2	vCM1	Two-sided Wilcoxon test	0.25	25
1.93613e-14	0.598155	0.791	0.688	4.50558e-10	Mkln1	vCM1	Two-sided Wilcoxon test	0.25	25
1.9373e-14	0.477687	0.888	0.795	4.5083e-10	Senp6	vCM1	Two-sided Wilcoxon test	0.25	25
2.28756e-14	0.592448	0.814	0.662	5.32338e-10	Large1	vCM1	Two-sided Wilcoxon test	0.25	25
2.53495e-14	0.521083	0.847	0.713	5.89908e-10	Sbf2	vCM1	Two-sided Wilcoxon test	0.25	25
2.83585e-14	0.595653	0.8	0.69	6.59931e-10	Trpm7	vCM1	Two-sided Wilcoxon test	0.25	25
3.75871e-14	0.59431	0.809	0.687	8.74689e-10	Igf2bp3	vCM1	Two-sided Wilcoxon test	0.25	25
3.94564e-14	0.585301	0.526	0.333	9.18191e-10	Spen	vCM1	Two-sided Wilcoxon test	0.25	25
4.02328e-14	0.649208	0.642	0.479	9.36257e-10	Spata5	vCM1	Two-sided Wilcoxon test	0.25	25
4.24234e-14	0.516367	0.833	0.718	9.87234e-10	Psme4	vCM1	Two-sided Wilcoxon test	0.25	25
4.36349e-14	0.604611	0.642	0.47	1.01543e-09	Epb41l5	vCM1	Two-sided Wilcoxon test	0.25	25
5.58107e-14	0.613411	0.609	0.43	1.29877e-09	Dock1	vCM1	Two-sided Wilcoxon test	0.25	25
5.78548e-14	0.910453	0.749	0.605	1.34634e-09	Fgf13	vCM1	Two-sided Wilcoxon test	0.25	25
6.76455e-14	0.723991	0.809	0.654	1.57418e-09	Esrrg	vCM1	Two-sided Wilcoxon test	0.25	25
6.97943e-14	0.591526	0.73	0.588	1.62418e-09	Abi2	vCM1	Two-sided Wilcoxon test	0.25	25
7.81863e-14	0.614467	0.828	0.73	1.81947e-09	Foxn3	vCM1	Two-sided Wilcoxon test	0.25	25
8.63207e-14	0.668471	0.67	0.525	2.00877e-09	Pbx3	vCM1	Two-sided Wilcoxon test	0.25	25
9.40286e-14	0.46543	0.381	0.172	2.18814e-09	Gm28376	vCM1	Two-sided Wilcoxon test	0.25	25
9.47779e-14	0.576051	0.507	0.313	2.20558e-09	Phykpl	vCM1	Two-sided Wilcoxon test	0.25	25
1.11757e-13	0.589048	0.512	0.304	2.60069e-09	Mms22l	vCM1	Two-sided Wilcoxon test	0.25	25
1.15014e-13	0.577944	0.665	0.484	2.67649e-09	Med12l	vCM1	Two-sided Wilcoxon test	0.25	25
1.21278e-13	0.494943	0.735	0.576	2.82227e-09	Zmym4	vCM1	Two-sided Wilcoxon test	0.25	25
1.51437e-13	0.580191	0.623	0.461	3.52408e-09	Nup153	vCM1	Two-sided Wilcoxon test	0.25	25
1.56292e-13	0.552449	0.87	0.759	3.63706e-09	Arhgap31	vCM1	Two-sided Wilcoxon test	0.25	25
1.66049e-13	0.55201	0.53	0.338	3.86413e-09	Tent4b	vCM1	Two-sided Wilcoxon test	0.25	25
1.83543e-13	0.577927	0.707	0.541	4.27123e-09	Rapgef2	vCM1	Two-sided Wilcoxon test	0.25	25
1.84198e-13	0.576405	0.795	0.693	4.28647e-09	Usp9x	vCM1	Two-sided Wilcoxon test	0.25	25
2.32395e-13	0.585455	0.688	0.519	5.40806e-09	Plekha7	vCM1	Two-sided Wilcoxon test	0.25	25
2.46984e-13	0.493125	0.451	0.246	5.74755e-09	Focad	vCM1	Two-sided Wilcoxon test	0.25	25
2.49755e-13	0.699514	0.712	0.581	5.81205e-09	Cacna2d1	vCM1	Two-sided Wilcoxon test	0.25	25
2.5883e-13	0.391937	0.963	0.894	6.02323e-09	Igf2r	vCM1	Two-sided Wilcoxon test	0.25	25
3.0761e-13	0.516903	0.902	0.868	7.15839e-09	Luc7l2	vCM1	Two-sided Wilcoxon test	0.25	25
3.8333e-13	0.526398	0.474	0.278	8.92048e-09	Gm49797	vCM1	Two-sided Wilcoxon test	0.25	25
3.8556e-13	0.566362	0.735	0.616	8.97236e-09	Chd6	vCM1	Two-sided Wilcoxon test	0.25	25
3.95947e-13	0.682089	0.447	0.254	9.21407e-09	Kif15	vCM1	Two-sided Wilcoxon test	0.25	25
4.92464e-13	0.553395	0.795	0.663	1.14601e-08	Nf1	vCM1	Two-sided Wilcoxon test	0.25	25
4.92767e-13	0.648079	0.586	0.43	1.14672e-08	Topbp1	vCM1	Two-sided Wilcoxon test	0.25	25
5.39539e-13	0.568938	0.693	0.558	1.25556e-08	Rfx7	vCM1	Two-sided Wilcoxon test	0.25	25
5.43216e-13	0.582229	0.698	0.504	1.26412e-08	Pdzrn3	vCM1	Two-sided Wilcoxon test	0.25	25
6.09098e-13	0.590101	0.73	0.599	1.41743e-08	Btbd9	vCM1	Two-sided Wilcoxon test	0.25	25
6.72824e-13	0.548662	0.623	0.46	1.56573e-08	Srcap	vCM1	Two-sided Wilcoxon test	0.25	25
7.24282e-13	0.423802	0.847	0.723	1.68548e-08	Rev3l	vCM1	Two-sided Wilcoxon test	0.25	25
7.30417e-13	0.769647	0.707	0.545	1.69975e-08	mt-Nd6	vCM1	Two-sided Wilcoxon test	0.25	25
7.62281e-13	0.559503	0.595	0.421	1.7739e-08	Ahctf1	vCM1	Two-sided Wilcoxon test	0.25	25
8.95943e-13	0.613738	0.656	0.46	2.08495e-08	Psd3	vCM1	Two-sided Wilcoxon test	0.25	25
9.55174e-13	0.585703	0.363	0.178	2.22279e-08	Col23a1	vCM1	Two-sided Wilcoxon test	0.25	25
1.03238e-12	0.472482	0.809	0.741	2.40245e-08	Pkn2	vCM1	Two-sided Wilcoxon test	0.25	25
1.14328e-12	0.568579	0.651	0.493	2.66053e-08	Fam193a	vCM1	Two-sided Wilcoxon test	0.25	25
1.18706e-12	0.513184	0.916	0.834	2.76241e-08	Ctnna3	vCM1	Two-sided Wilcoxon test	0.25	25
1.24894e-12	0.622972	0.744	0.627	2.9064e-08	Tcf7l2	vCM1	Two-sided Wilcoxon test	0.25	25
1.31757e-12	0.548607	0.763	0.64	3.06611e-08	Phip	vCM1	Two-sided Wilcoxon test	0.25	25
1.40196e-12	0.322865	0.265	0.096	3.26251e-08	4930455C13Rik	vCM1	Two-sided Wilcoxon test	0.25	25
1.42417e-12	0.645825	0.405	0.221	3.31418e-08	Plekha3	vCM1	Two-sided Wilcoxon test	0.25	25
1.60484e-12	0.584664	0.465	0.27	3.73461e-08	Pdzd2	vCM1	Two-sided Wilcoxon test	0.25	25
1.90388e-12	0.340075	0.972	0.863	4.43052e-08	Ank3	vCM1	Two-sided Wilcoxon test	0.25	25
1.91144e-12	0.650377	0.693	0.585	4.44811e-08	Pkp4	vCM1	Two-sided Wilcoxon test	0.25	25
2.01328e-12	0.522513	0.814	0.739	4.6851e-08	Wdr33	vCM1	Two-sided Wilcoxon test	0.25	25
2.04128e-12	0.527735	0.842	0.734	4.75025e-08	Ptbp2	vCM1	Two-sided Wilcoxon test	0.25	25
2.04864e-12	0.540992	0.707	0.549	4.76739e-08	Fbxl17	vCM1	Two-sided Wilcoxon test	0.25	25
2.09201e-12	0.536528	0.763	0.678	4.86831e-08	Faf1	vCM1	Two-sided Wilcoxon test	0.25	25
2.12102e-12	0.513424	0.721	0.649	4.93582e-08	Ehmt1	vCM1	Two-sided Wilcoxon test	0.25	25
2.24655e-12	0.558427	0.377	0.185	5.22795e-08	Myo16	vCM1	Two-sided Wilcoxon test	0.25	25
2.31616e-12	0.524352	0.847	0.734	5.38993e-08	Utrn	vCM1	Two-sided Wilcoxon test	0.25	25
2.38085e-12	0.521785	0.753	0.613	5.54047e-08	Mtmr3	vCM1	Two-sided Wilcoxon test	0.25	25
3.00144e-12	0.509206	0.856	0.81	6.98466e-08	Lrrfip1	vCM1	Two-sided Wilcoxon test	0.25	25
3.20498e-12	0.632596	0.516	0.331	7.45831e-08	BC052040	vCM1	Two-sided Wilcoxon test	0.25	25
3.46499e-12	0.48713	0.712	0.595	8.06337e-08	Bptf	vCM1	Two-sided Wilcoxon test	0.25	25
3.49711e-12	0.538336	0.749	0.601	8.13812e-08	Tmcc1	vCM1	Two-sided Wilcoxon test	0.25	25
3.62082e-12	0.435923	0.316	0.144	8.42602e-08	Cep152	vCM1	Two-sided Wilcoxon test	0.25	25
3.78819e-12	0.54399	0.842	0.723	8.81549e-08	Cdk14	vCM1	Two-sided Wilcoxon test	0.25	25
3.80658e-12	0.511237	0.777	0.663	8.85829e-08	Eif4g3	vCM1	Two-sided Wilcoxon test	0.25	25
4.0369e-12	0.588843	0.442	0.256	9.39427e-08	Myo10	vCM1	Two-sided Wilcoxon test	0.25	25
4.2874e-12	0.590683	0.465	0.275	9.97721e-08	Lin28b	vCM1	Two-sided Wilcoxon test	0.25	25
4.28929e-12	0.517665	0.753	0.621	9.98162e-08	Rasal2	vCM1	Two-sided Wilcoxon test	0.25	25
4.36729e-12	0.464728	0.763	0.606	1.01631e-07	Tanc1	vCM1	Two-sided Wilcoxon test	0.25	25
4.66023e-12	0.472867	0.744	0.606	1.08448e-07	Larp4	vCM1	Two-sided Wilcoxon test	0.25	25
5.11473e-12	0.509523	0.702	0.549	1.19025e-07	Asxl2	vCM1	Two-sided Wilcoxon test	0.25	25
5.427e-12	0.579038	0.665	0.524	1.26292e-07	Arhgap10	vCM1	Two-sided Wilcoxon test	0.25	25
6.01542e-12	0.490594	0.777	0.643	1.39985e-07	Usp47	vCM1	Two-sided Wilcoxon test	0.25	25
6.06312e-12	0.41808	1	0.994	1.41095e-07	AY036118	vCM1	Two-sided Wilcoxon test	0.25	25
6.26256e-12	0.523818	0.6	0.421	1.45736e-07	Fat1	vCM1	Two-sided Wilcoxon test	0.25	25
6.27872e-12	0.518729	0.809	0.715	1.46112e-07	Strbp	vCM1	Two-sided Wilcoxon test	0.25	25
6.57913e-12	0.472327	0.777	0.653	1.53103e-07	Smg6	vCM1	Two-sided Wilcoxon test	0.25	25
6.63845e-12	0.657622	0.633	0.475	1.54483e-07	Nhsl2	vCM1	Two-sided Wilcoxon test	0.25	25
6.82462e-12	0.482325	0.823	0.755	1.58816e-07	Ppp2r3a	vCM1	Two-sided Wilcoxon test	0.25	25
6.89481e-12	0.524821	0.74	0.603	1.60449e-07	Cdk13	vCM1	Two-sided Wilcoxon test	0.25	25
7.35056e-12	0.599976	0.665	0.531	1.71055e-07	Ptpn4	vCM1	Two-sided Wilcoxon test	0.25	25
7.43983e-12	0.591828	0.549	0.383	1.73132e-07	Ranbp17	vCM1	Two-sided Wilcoxon test	0.25	25
7.73887e-12	0.622439	0.521	0.351	1.80091e-07	Pi4kb	vCM1	Two-sided Wilcoxon test	0.25	25
7.76686e-12	0.520672	0.763	0.649	1.80743e-07	Crebbp	vCM1	Two-sided Wilcoxon test	0.25	25
9.34346e-12	0.446347	0.865	0.787	2.17432e-07	Nktr	vCM1	Two-sided Wilcoxon test	0.25	25
1.01362e-11	0.532669	0.619	0.462	2.3588e-07	Tmem245	vCM1	Two-sided Wilcoxon test	0.25	25
1.20454e-11	0.46109	0.488	0.289	2.80307e-07	Pde3b	vCM1	Two-sided Wilcoxon test	0.25	25
1.21131e-11	0.606206	0.684	0.557	2.81883e-07	Dennd1a	vCM1	Two-sided Wilcoxon test	0.25	25
1.28985e-11	0.591866	0.558	0.387	3.00161e-07	Ncapd3	vCM1	Two-sided Wilcoxon test	0.25	25
1.34599e-11	0.464282	0.814	0.661	3.13225e-07	Dlg1	vCM1	Two-sided Wilcoxon test	0.25	25
1.50387e-11	0.502731	0.572	0.407	3.49966e-07	Hira	vCM1	Two-sided Wilcoxon test	0.25	25
1.50926e-11	0.572128	0.502	0.332	3.51221e-07	Slx4ip	vCM1	Two-sided Wilcoxon test	0.25	25
1.63357e-11	0.444224	0.74	0.602	3.80148e-07	Erbin	vCM1	Two-sided Wilcoxon test	0.25	25
1.68542e-11	0.562999	0.712	0.627	3.92214e-07	Ctdspl2	vCM1	Two-sided Wilcoxon test	0.25	25
1.78286e-11	0.539922	0.544	0.373	4.14889e-07	Rapgef1	vCM1	Two-sided Wilcoxon test	0.25	25
2.40468e-11	0.47195	0.265	0.11	5.59594e-07	Gm28050	vCM1	Two-sided Wilcoxon test	0.25	25
2.79689e-11	0.507654	0.698	0.555	6.50864e-07	Prkd1	vCM1	Two-sided Wilcoxon test	0.25	25
3.0586e-11	0.519674	0.791	0.683	7.11767e-07	Cux1	vCM1	Two-sided Wilcoxon test	0.25	25
3.27627e-11	0.535997	0.735	0.593	7.6242e-07	Pde4dip	vCM1	Two-sided Wilcoxon test	0.25	25
3.6561e-11	0.457331	0.823	0.722	8.50812e-07	Gata4	vCM1	Two-sided Wilcoxon test	0.25	25
3.74159e-11	0.45672	0.288	0.128	8.70705e-07	Mrc2	vCM1	Two-sided Wilcoxon test	0.25	25
3.74991e-11	0.452658	0.847	0.684	8.72641e-07	Ptprd	vCM1	Two-sided Wilcoxon test	0.25	25
3.76506e-11	0.512229	0.772	0.678	8.76168e-07	Wwc2	vCM1	Two-sided Wilcoxon test	0.25	25
4.21868e-11	0.442845	0.842	0.745	9.81729e-07	Ppp3ca	vCM1	Two-sided Wilcoxon test	0.25	25
4.42585e-11	0.534402	0.777	0.687	1.02994e-06	Tnpo1	vCM1	Two-sided Wilcoxon test	0.25	25
4.49094e-11	0.557046	0.712	0.573	1.04509e-06	Sox6	vCM1	Two-sided Wilcoxon test	0.25	25
4.70502e-11	0.545311	0.53	0.356	1.09491e-06	Lrba	vCM1	Two-sided Wilcoxon test	0.25	25
5.03253e-11	0.562723	0.563	0.377	1.17112e-06	Gm13269	vCM1	Two-sided Wilcoxon test	0.25	25
5.07008e-11	0.412567	0.805	0.675	1.17986e-06	Nbea	vCM1	Two-sided Wilcoxon test	0.25	25
5.58778e-11	1.03696	0.474	0.303	1.30033e-06	Fat3	vCM1	Two-sided Wilcoxon test	0.25	25
5.81904e-11	0.555471	0.465	0.291	1.35415e-06	Atad5	vCM1	Two-sided Wilcoxon test	0.25	25
6.10349e-11	0.378641	0.284	0.124	1.42034e-06	Map7	vCM1	Two-sided Wilcoxon test	0.25	25
6.1547e-11	0.501585	0.847	0.803	1.43226e-06	Gsk3b	vCM1	Two-sided Wilcoxon test	0.25	25
6.38188e-11	0.492508	0.781	0.711	1.48513e-06	Rbm26	vCM1	Two-sided Wilcoxon test	0.25	25
6.39809e-11	0.421125	0.777	0.655	1.4889e-06	Kpna4	vCM1	Two-sided Wilcoxon test	0.25	25
6.87531e-11	0.558794	0.647	0.534	1.59995e-06	Rc3h1	vCM1	Two-sided Wilcoxon test	0.25	25
7.26043e-11	0.424633	0.805	0.658	1.68957e-06	Zeb1	vCM1	Two-sided Wilcoxon test	0.25	25
7.60127e-11	0.535141	0.67	0.538	1.76889e-06	Tsc22d2	vCM1	Two-sided Wilcoxon test	0.25	25
7.66608e-11	0.499206	0.665	0.521	1.78397e-06	Gls	vCM1	Two-sided Wilcoxon test	0.25	25
7.69591e-11	0.477725	0.307	0.141	1.79091e-06	Cep128	vCM1	Two-sided Wilcoxon test	0.25	25
7.79769e-11	0.528985	0.879	0.754	1.8146e-06	Grip1	vCM1	Two-sided Wilcoxon test	0.25	25
8.78576e-11	0.581853	0.549	0.367	2.04453e-06	Tenm2	vCM1	Two-sided Wilcoxon test	0.25	25
8.89051e-11	0.466909	0.814	0.661	2.06891e-06	Tmem108	vCM1	Two-sided Wilcoxon test	0.25	25
9.80725e-11	0.419073	0.26	0.107	2.28225e-06	4930484I04Rik	vCM1	Two-sided Wilcoxon test	0.25	25
9.86664e-11	0.799665	0.595	0.451	2.29607e-06	Mid1	vCM1	Two-sided Wilcoxon test	0.25	25
1.02527e-10	0.549585	0.572	0.42	2.38592e-06	Cnot6l	vCM1	Two-sided Wilcoxon test	0.25	25
1.12324e-10	0.484371	0.73	0.574	2.61389e-06	Zfp521	vCM1	Two-sided Wilcoxon test	0.25	25
1.19885e-10	0.489076	0.684	0.536	2.78985e-06	Helz	vCM1	Two-sided Wilcoxon test	0.25	25
1.20042e-10	0.460303	0.828	0.704	2.79349e-06	Clasp1	vCM1	Two-sided Wilcoxon test	0.25	25
1.31811e-10	0.470551	0.744	0.632	3.06738e-06	Fam172a	vCM1	Two-sided Wilcoxon test	0.25	25
1.32742e-10	0.390204	0.879	0.798	3.08905e-06	Rock1	vCM1	Two-sided Wilcoxon test	0.25	25
1.33089e-10	0.470739	0.609	0.458	3.09711e-06	Chka	vCM1	Two-sided Wilcoxon test	0.25	25
1.34919e-10	0.462881	0.484	0.315	3.13971e-06	Nup160	vCM1	Two-sided Wilcoxon test	0.25	25
1.46377e-10	0.500034	0.847	0.74	3.40635e-06	Atxn1	vCM1	Two-sided Wilcoxon test	0.25	25
1.46961e-10	0.522457	0.577	0.421	3.41993e-06	Xpo4	vCM1	Two-sided Wilcoxon test	0.25	25
1.57302e-10	0.449103	0.358	0.189	3.66058e-06	Cit	vCM1	Two-sided Wilcoxon test	0.25	25
1.82468e-10	0.382229	0.298	0.139	4.2462e-06	Ticrr	vCM1	Two-sided Wilcoxon test	0.25	25
1.96206e-10	0.577281	0.791	0.67	4.5659e-06	Rabgap1l	vCM1	Two-sided Wilcoxon test	0.25	25
2.06473e-10	0.507584	0.679	0.56	4.80482e-06	Rif1	vCM1	Two-sided Wilcoxon test	0.25	25
2.20024e-10	0.486897	0.6	0.458	5.12019e-06	Yeats2	vCM1	Two-sided Wilcoxon test	0.25	25
2.25464e-10	0.491002	0.66	0.532	5.24676e-06	Zfp704	vCM1	Two-sided Wilcoxon test	0.25	25
2.4133e-10	0.512713	0.753	0.673	5.61599e-06	Msrb3	vCM1	Two-sided Wilcoxon test	0.25	25
2.58225e-10	0.564715	0.665	0.546	6.00916e-06	Mib1	vCM1	Two-sided Wilcoxon test	0.25	25
2.61017e-10	0.695481	0.553	0.396	6.07413e-06	Macrod2	vCM1	Two-sided Wilcoxon test	0.25	25
2.65582e-10	0.44042	0.73	0.6	6.18036e-06	Cog5	vCM1	Two-sided Wilcoxon test	0.25	25
2.86556e-10	0.422351	0.781	0.697	6.66844e-06	Cdk8	vCM1	Two-sided Wilcoxon test	0.25	25
3.05524e-10	0.457787	0.66	0.542	7.10985e-06	Mapkapk2	vCM1	Two-sided Wilcoxon test	0.25	25
3.12339e-10	0.487655	0.614	0.479	7.26845e-06	Clock	vCM1	Two-sided Wilcoxon test	0.25	25
3.15027e-10	0.556082	0.493	0.341	7.33099e-06	Xpo6	vCM1	Two-sided Wilcoxon test	0.25	25
3.2203e-10	0.48691	0.586	0.444	7.49396e-06	Prrc2b	vCM1	Two-sided Wilcoxon test	0.25	25
3.24006e-10	0.398914	0.786	0.685	7.53993e-06	Ascc3	vCM1	Two-sided Wilcoxon test	0.25	25
3.42644e-10	0.568164	0.665	0.571	7.97367e-06	Fryl	vCM1	Two-sided Wilcoxon test	0.25	25
3.48778e-10	0.563843	0.502	0.366	8.11642e-06	Ranbp9	vCM1	Two-sided Wilcoxon test	0.25	25
3.52043e-10	0.404056	0.767	0.641	8.19239e-06	Tnks	vCM1	Two-sided Wilcoxon test	0.25	25
3.65848e-10	0.584208	0.563	0.437	8.51365e-06	Hs2st1	vCM1	Two-sided Wilcoxon test	0.25	25
3.66767e-10	0.479633	0.781	0.702	8.53503e-06	Rock2	vCM1	Two-sided Wilcoxon test	0.25	25
3.74064e-10	0.418362	0.884	0.788	8.70483e-06	Bmpr1a	vCM1	Two-sided Wilcoxon test	0.25	25
3.74571e-10	0.403651	0.707	0.581	8.71663e-06	Mbtd1	vCM1	Two-sided Wilcoxon test	0.25	25
3.77203e-10	0.583977	0.647	0.516	8.7779e-06	Bach2	vCM1	Two-sided Wilcoxon test	0.25	25
3.94441e-10	0.492653	0.591	0.444	9.17904e-06	Lnpep	vCM1	Two-sided Wilcoxon test	0.25	25
4.05482e-10	0.44744	0.721	0.578	9.43598e-06	Ncoa2	vCM1	Two-sided Wilcoxon test	0.25	25
4.21127e-10	0.59072	0.758	0.669	9.80005e-06	Atrnl1	vCM1	Two-sided Wilcoxon test	0.25	25
4.25054e-10	0.432364	0.428	0.259	9.89143e-06	Utp20	vCM1	Two-sided Wilcoxon test	0.25	25
4.41237e-10	0.503316	0.665	0.552	1.0268e-05	Pds5b	vCM1	Two-sided Wilcoxon test	0.25	25
4.45686e-10	0.678485	0.605	0.452	1.03716e-05	Cadm1	vCM1	Two-sided Wilcoxon test	0.25	25
4.90531e-10	0.547296	0.521	0.364	1.14151e-05	1600010M07Rik	vCM1	Two-sided Wilcoxon test	0.25	25
5.37745e-10	0.467674	0.274	0.128	1.25139e-05	Slc35d2	vCM1	Two-sided Wilcoxon test	0.25	25
5.40333e-10	0.540551	0.921	0.856	1.25741e-05	Lpp	vCM1	Two-sided Wilcoxon test	0.25	25
5.70251e-10	0.509368	0.665	0.528	1.32703e-05	Rfx3	vCM1	Two-sided Wilcoxon test	0.25	25
5.86737e-10	0.30047	0.94	0.852	1.3654e-05	Gpc3	vCM1	Two-sided Wilcoxon test	0.25	25
5.89846e-10	0.627031	0.726	0.666	1.37263e-05	Vmp1	vCM1	Two-sided Wilcoxon test	0.25	25
6.51368e-10	0.368653	0.898	0.831	1.5158e-05	Strn3	vCM1	Two-sided Wilcoxon test	0.25	25
6.71183e-10	0.555555	0.581	0.446	1.56191e-05	Cdc42bpa	vCM1	Two-sided Wilcoxon test	0.25	25
6.71726e-10	0.498806	0.595	0.469	1.56317e-05	Paxbp1	vCM1	Two-sided Wilcoxon test	0.25	25
7.05122e-10	0.528155	0.74	0.627	1.64089e-05	Iqsec1	vCM1	Two-sided Wilcoxon test	0.25	25
7.09865e-10	0.529593	0.516	0.362	1.65193e-05	Sap130	vCM1	Two-sided Wilcoxon test	0.25	25
7.28309e-10	0.499041	0.684	0.581	1.69485e-05	Cstf3	vCM1	Two-sided Wilcoxon test	0.25	25
7.53751e-10	0.560328	0.493	0.342	1.75405e-05	Sfmbt1	vCM1	Two-sided Wilcoxon test	0.25	25
8.01826e-10	0.455988	0.414	0.25	1.86593e-05	Cux2	vCM1	Two-sided Wilcoxon test	0.25	25
8.05206e-10	0.749042	0.642	0.536	1.8738e-05	Wwox	vCM1	Two-sided Wilcoxon test	0.25	25
8.39199e-10	0.419483	0.8	0.743	1.9529e-05	Wac	vCM1	Two-sided Wilcoxon test	0.25	25
8.46324e-10	0.439761	0.628	0.466	1.96948e-05	Col2a1	vCM1	Two-sided Wilcoxon test	0.25	25
8.51639e-10	0.48993	0.749	0.621	1.98185e-05	Fras1	vCM1	Two-sided Wilcoxon test	0.25	25
8.61363e-10	0.465047	0.86	0.847	2.00448e-05	Tra2b	vCM1	Two-sided Wilcoxon test	0.25	25
9.46616e-10	0.541091	0.558	0.402	2.20287e-05	Gm10848	vCM1	Two-sided Wilcoxon test	0.25	25
9.91508e-10	0.472771	0.423	0.267	2.30734e-05	Cep192	vCM1	Two-sided Wilcoxon test	0.25	25
1.04172e-09	0.431899	0.749	0.625	2.42419e-05	Mbd5	vCM1	Two-sided Wilcoxon test	0.25	25
1.10219e-09	0.65044	0.693	0.564	2.56491e-05	Aff2	vCM1	Two-sided Wilcoxon test	0.25	25
1.2353e-09	0.443189	0.726	0.648	2.87467e-05	Stag2	vCM1	Two-sided Wilcoxon test	0.25	25
1.53987e-09	0.607406	0.507	0.354	3.58342e-05	Cenpp	vCM1	Two-sided Wilcoxon test	0.25	25
1.56718e-09	0.425035	0.591	0.43	3.64699e-05	Gm37240	vCM1	Two-sided Wilcoxon test	0.25	25
1.67392e-09	0.373376	0.814	0.75	3.89538e-05	Zfr	vCM1	Two-sided Wilcoxon test	0.25	25
1.70715e-09	0.551987	0.591	0.45	3.9727e-05	Stox2	vCM1	Two-sided Wilcoxon test	0.25	25
1.7463e-09	0.497095	0.74	0.687	4.06381e-05	Luzp1	vCM1	Two-sided Wilcoxon test	0.25	25
1.833e-09	0.511323	0.493	0.338	4.26558e-05	Dync2h1	vCM1	Two-sided Wilcoxon test	0.25	25
2.05189e-09	0.499936	0.698	0.566	4.77495e-05	Myo18b	vCM1	Two-sided Wilcoxon test	0.25	25
2.32457e-09	0.496899	0.716	0.593	5.40951e-05	Sppl3	vCM1	Two-sided Wilcoxon test	0.25	25
2.41601e-09	0.459917	0.763	0.691	5.6223e-05	Setd5	vCM1	Two-sided Wilcoxon test	0.25	25
2.7266e-09	0.3948	0.749	0.64	6.34506e-05	Scmh1	vCM1	Two-sided Wilcoxon test	0.25	25
2.88913e-09	0.415768	0.698	0.594	6.7233e-05	Rbm6	vCM1	Two-sided Wilcoxon test	0.25	25
3.43268e-09	0.476459	0.637	0.502	7.9882e-05	Evi5	vCM1	Two-sided Wilcoxon test	0.25	25
3.76881e-09	0.383312	0.819	0.749	8.7704e-05	Mef2a	vCM1	Two-sided Wilcoxon test	0.25	25
4.0596e-09	0.527122	0.526	0.355	9.44709e-05	Gm47271	vCM1	Two-sided Wilcoxon test	0.25	25
4.2872e-09	0.479543	0.577	0.441	9.97674e-05	Pias1	vCM1	Two-sided Wilcoxon test	0.25	25
4.36586e-09	0.41632	0.837	0.735	0.000101598	Arid4b	vCM1	Two-sided Wilcoxon test	0.25	25
4.61733e-09	0.466267	0.572	0.457	0.00010745	Ep300	vCM1	Two-sided Wilcoxon test	0.25	25
4.80117e-09	0.483073	0.628	0.508	0.000111728	Dync1h1	vCM1	Two-sided Wilcoxon test	0.25	25
5.18101e-09	0.394014	0.805	0.723	0.000120567	Trip12	vCM1	Two-sided Wilcoxon test	0.25	25
5.30768e-09	0.437546	0.391	0.224	0.000123515	Gm14582	vCM1	Two-sided Wilcoxon test	0.25	25
5.43761e-09	0.463268	0.828	0.767	0.000126539	Pcm1	vCM1	Two-sided Wilcoxon test	0.25	25
5.45863e-09	0.467853	0.493	0.353	0.000127028	Usp7	vCM1	Two-sided Wilcoxon test	0.25	25
5.59878e-09	0.418164	0.679	0.56	0.000130289	Kdm2a	vCM1	Two-sided Wilcoxon test	0.25	25
5.70627e-09	0.420544	0.702	0.606	0.000132791	Pds5a	vCM1	Two-sided Wilcoxon test	0.25	25
5.87905e-09	0.460476	0.526	0.375	0.000136811	Cdk6	vCM1	Two-sided Wilcoxon test	0.25	25
5.90044e-09	0.449222	0.651	0.542	0.000137309	Slmap	vCM1	Two-sided Wilcoxon test	0.25	25
6.01056e-09	0.454195	0.549	0.421	0.000139872	Usp24	vCM1	Two-sided Wilcoxon test	0.25	25
6.30035e-09	0.438048	0.665	0.56	0.000146615	Ankhd1	vCM1	Two-sided Wilcoxon test	0.25	25
6.84041e-09	0.563703	0.623	0.525	0.000159183	Oxr1	vCM1	Two-sided Wilcoxon test	0.25	25
7.15369e-09	0.555817	0.428	0.28	0.000166474	Ect2	vCM1	Two-sided Wilcoxon test	0.25	25
7.2537e-09	0.470315	0.484	0.328	0.000168801	Atp11c	vCM1	Two-sided Wilcoxon test	0.25	25
7.37817e-09	0.467339	0.735	0.605	0.000171697	Akt3	vCM1	Two-sided Wilcoxon test	0.25	25
7.74422e-09	0.433874	0.386	0.23	0.000180216	Jph1	vCM1	Two-sided Wilcoxon test	0.25	25
8.01553e-09	0.445754	0.763	0.662	0.000186529	Daam1	vCM1	Two-sided Wilcoxon test	0.25	25
8.12612e-09	0.410037	0.805	0.699	0.000189103	Gpatch8	vCM1	Two-sided Wilcoxon test	0.25	25
8.59468e-09	0.489447	0.6	0.491	0.000200007	Lamc1	vCM1	Two-sided Wilcoxon test	0.25	25
9.15268e-09	0.362313	0.288	0.146	0.000212992	Gm12526	vCM1	Two-sided Wilcoxon test	0.25	25
9.80114e-09	0.336739	0.702	0.555	0.000228082	Prtg	vCM1	Two-sided Wilcoxon test	0.25	25
9.87024e-09	0.46134	0.735	0.641	0.00022969	Zmiz1	vCM1	Two-sided Wilcoxon test	0.25	25
9.8746e-09	0.396927	0.679	0.568	0.000229792	Man1a2	vCM1	Two-sided Wilcoxon test	0.25	25
1.0192e-08	0.3809	0.349	0.185	0.000237177	Rsf1os1	vCM1	Two-sided Wilcoxon test	0.25	25
1.02217e-08	0.408645	0.66	0.56	0.00023787	Col4a1	vCM1	Two-sided Wilcoxon test	0.25	25
1.03518e-08	0.386728	0.753	0.66	0.000240897	Ube2g1	vCM1	Two-sided Wilcoxon test	0.25	25
1.08283e-08	0.346736	0.284	0.137	0.000251985	Gm43713	vCM1	Two-sided Wilcoxon test	0.25	25
1.17007e-08	0.445094	0.698	0.603	0.000272287	Ube2e2	vCM1	Two-sided Wilcoxon test	0.25	25
1.19042e-08	0.438653	0.581	0.448	0.000277024	Acvr2a	vCM1	Two-sided Wilcoxon test	0.25	25
1.24628e-08	0.46002	0.614	0.5	0.000290022	Ube3c	vCM1	Two-sided Wilcoxon test	0.25	25
1.29987e-08	0.393314	0.712	0.61	0.000302492	Ssbp2	vCM1	Two-sided Wilcoxon test	0.25	25
1.40975e-08	0.459191	0.53	0.385	0.000328063	Nfkb1	vCM1	Two-sided Wilcoxon test	0.25	25
1.52129e-08	0.446932	0.744	0.675	0.000354018	Jarid2	vCM1	Two-sided Wilcoxon test	0.25	25
1.57732e-08	0.483476	0.6	0.488	0.000367058	Rsbn1l	vCM1	Two-sided Wilcoxon test	0.25	25
1.60023e-08	0.329108	0.763	0.642	0.000372389	Etv6	vCM1	Two-sided Wilcoxon test	0.25	25
1.62272e-08	0.368095	0.274	0.131	0.000377622	Kcnt2	vCM1	Two-sided Wilcoxon test	0.25	25
1.7083e-08	0.451432	0.702	0.65	0.000397538	Cdk12	vCM1	Two-sided Wilcoxon test	0.25	25
1.90786e-08	0.406809	0.316	0.172	0.000443979	Lrig1	vCM1	Two-sided Wilcoxon test	0.25	25
1.92533e-08	0.518776	0.563	0.433	0.000448044	Shb	vCM1	Two-sided Wilcoxon test	0.25	25
2.05342e-08	0.408172	0.628	0.491	0.000477851	Zfhx3	vCM1	Two-sided Wilcoxon test	0.25	25
2.06637e-08	0.430318	0.465	0.32	0.000480865	Lmtk2	vCM1	Two-sided Wilcoxon test	0.25	25
2.19582e-08	0.490917	0.642	0.537	0.000510989	Ralgapa2	vCM1	Two-sided Wilcoxon test	0.25	25
2.20383e-08	0.459513	0.46	0.312	0.000512853	Mcph1	vCM1	Two-sided Wilcoxon test	0.25	25
2.30019e-08	0.465588	0.46	0.315	0.000535276	Cep112	vCM1	Two-sided Wilcoxon test	0.25	25
2.30851e-08	0.425852	0.647	0.555	0.000537213	Baz1b	vCM1	Two-sided Wilcoxon test	0.25	25
2.53374e-08	0.509345	0.386	0.246	0.000589626	Phlpp2	vCM1	Two-sided Wilcoxon test	0.25	25
2.57725e-08	0.41751	0.8	0.754	0.000599751	Chchd3	vCM1	Two-sided Wilcoxon test	0.25	25
2.68664e-08	0.418586	0.437	0.302	0.000625208	Ppargc1b	vCM1	Two-sided Wilcoxon test	0.25	25
2.73328e-08	0.474176	0.409	0.266	0.000636062	Tmem131l	vCM1	Two-sided Wilcoxon test	0.25	25
2.81644e-08	0.359871	0.814	0.711	0.000655415	Prkce	vCM1	Two-sided Wilcoxon test	0.25	25
2.83443e-08	0.441595	0.726	0.668	0.0006596	R3hdm1	vCM1	Two-sided Wilcoxon test	0.25	25
2.88694e-08	0.391049	0.74	0.647	0.000671819	Usp15	vCM1	Two-sided Wilcoxon test	0.25	25
3.25483e-08	0.447276	0.586	0.476	0.000757432	Ints7	vCM1	Two-sided Wilcoxon test	0.25	25
3.27767e-08	0.636141	0.451	0.305	0.000762746	Adgrl3	vCM1	Two-sided Wilcoxon test	0.25	25
3.36173e-08	0.493694	0.684	0.568	0.000782308	Nfat5	vCM1	Two-sided Wilcoxon test	0.25	25
3.48878e-08	0.325809	0.316	0.163	0.000811875	Gm42439	vCM1	Two-sided Wilcoxon test	0.25	25
3.84403e-08	0.405034	0.465	0.327	0.000894544	Nup155	vCM1	Two-sided Wilcoxon test	0.25	25
3.97579e-08	0.500846	0.479	0.327	0.000925206	Lef1	vCM1	Two-sided Wilcoxon test	0.25	25
4.1047e-08	0.480813	0.549	0.429	0.000955205	Arhgap35	vCM1	Two-sided Wilcoxon test	0.25	25
4.61483e-08	0.471587	0.386	0.251	0.00107392	Pcca	vCM1	Two-sided Wilcoxon test	0.25	25
4.72132e-08	0.345223	0.553	0.401	0.0010987	Map3k3	vCM1	Two-sided Wilcoxon test	0.25	25
4.7488e-08	0.469737	0.763	0.711	0.00110509	Rsrc1	vCM1	Two-sided Wilcoxon test	0.25	25
4.81722e-08	0.497077	0.591	0.47	0.00112102	Phtf2	vCM1	Two-sided Wilcoxon test	0.25	25
4.84465e-08	0.390409	0.521	0.366	0.0011274	Syne1	vCM1	Two-sided Wilcoxon test	0.25	25
4.94955e-08	0.425316	0.679	0.6	0.00115181	Tjp1	vCM1	Two-sided Wilcoxon test	0.25	25
5.00775e-08	0.404824	0.474	0.336	0.00116535	Zbtb11	vCM1	Two-sided Wilcoxon test	0.25	25
5.251e-08	0.546878	0.493	0.354	0.00122196	Gm35188	vCM1	Two-sided Wilcoxon test	0.25	25
5.41013e-08	0.417829	0.605	0.499	0.00125899	Setd2	vCM1	Two-sided Wilcoxon test	0.25	25
5.80359e-08	0.350783	0.879	0.814	0.00135055	Vcan	vCM1	Two-sided Wilcoxon test	0.25	25
6.46972e-08	0.392175	0.563	0.429	0.00150557	Abl2	vCM1	Two-sided Wilcoxon test	0.25	25
6.60829e-08	0.43116	0.595	0.499	0.00153782	Ipo11	vCM1	Two-sided Wilcoxon test	0.25	25
6.61902e-08	0.338269	0.781	0.7	0.00154031	Thoc2	vCM1	Two-sided Wilcoxon test	0.25	25
6.65007e-08	0.651408	0.381	0.234	0.00154754	Ror1	vCM1	Two-sided Wilcoxon test	0.25	25
6.70162e-08	0.314651	0.54	0.383	0.00155953	Man1c1	vCM1	Two-sided Wilcoxon test	0.25	25
6.72622e-08	0.453218	0.651	0.56	0.00156526	Dock7	vCM1	Two-sided Wilcoxon test	0.25	25
7.16419e-08	0.364712	0.395	0.241	0.00166718	Ankrd44	vCM1	Two-sided Wilcoxon test	0.25	25
7.31902e-08	0.559218	0.423	0.292	0.00170321	Prim2	vCM1	Two-sided Wilcoxon test	0.25	25
7.50782e-08	0.491752	0.619	0.515	0.00174715	Pan3	vCM1	Two-sided Wilcoxon test	0.25	25
7.56209e-08	0.354382	0.828	0.762	0.00175977	Zfand3	vCM1	Two-sided Wilcoxon test	0.25	25
7.70891e-08	0.428713	0.633	0.515	0.00179394	Exoc6b	vCM1	Two-sided Wilcoxon test	0.25	25
7.87781e-08	0.388496	0.535	0.412	0.00183324	Ankib1	vCM1	Two-sided Wilcoxon test	0.25	25
7.93636e-08	0.477292	0.572	0.458	0.00184687	Dennd1b	vCM1	Two-sided Wilcoxon test	0.25	25
8.13103e-08	0.369309	0.795	0.71	0.00189217	Bbx	vCM1	Two-sided Wilcoxon test	0.25	25
8.65231e-08	0.29452	0.279	0.143	0.00201348	Polq	vCM1	Two-sided Wilcoxon test	0.25	25
8.67344e-08	0.438583	0.847	0.822	0.0020184	Myom1	vCM1	Two-sided Wilcoxon test	0.25	25
8.96048e-08	0.418727	0.433	0.295	0.00208519	Prdm10	vCM1	Two-sided Wilcoxon test	0.25	25
9.10822e-08	0.550455	0.428	0.291	0.00211957	Kif11	vCM1	Two-sided Wilcoxon test	0.25	25
9.13945e-08	0.422597	0.679	0.599	0.00212684	Ap3b1	vCM1	Two-sided Wilcoxon test	0.25	25
9.77406e-08	0.414531	0.679	0.575	0.00227452	Foxj3	vCM1	Two-sided Wilcoxon test	0.25	25
1.00371e-07	0.36979	0.549	0.409	0.00233574	Mdn1	vCM1	Two-sided Wilcoxon test	0.25	25
1.02342e-07	0.438824	0.693	0.619	0.0023816	Sipa1l1	vCM1	Two-sided Wilcoxon test	0.25	25
1.06953e-07	0.393107	0.553	0.426	0.00248891	Ccnt2	vCM1	Two-sided Wilcoxon test	0.25	25
1.07663e-07	0.738801	0.358	0.221	0.00250543	Ntn1	vCM1	Two-sided Wilcoxon test	0.25	25
1.09792e-07	0.341636	0.27	0.139	0.00255496	Kcnq1	vCM1	Two-sided Wilcoxon test	0.25	25
1.12972e-07	0.448966	0.702	0.633	0.00262898	Tcf4	vCM1	Two-sided Wilcoxon test	0.25	25
1.15929e-07	0.58304	0.493	0.379	0.0026978	Zfp367	vCM1	Two-sided Wilcoxon test	0.25	25
1.16057e-07	0.42479	0.353	0.22	0.00270076	Ints2	vCM1	Two-sided Wilcoxon test	0.25	25
1.19211e-07	0.397375	0.507	0.375	0.00277417	Cpne1	vCM1	Two-sided Wilcoxon test	0.25	25
1.23603e-07	0.408806	0.684	0.622	0.00287638	Ash1l	vCM1	Two-sided Wilcoxon test	0.25	25
1.25624e-07	0.397263	0.484	0.356	0.00292339	Kansl1l	vCM1	Two-sided Wilcoxon test	0.25	25
1.26551e-07	0.335572	0.698	0.612	0.00294496	Btaf1	vCM1	Two-sided Wilcoxon test	0.25	25
1.31351e-07	0.680669	0.535	0.415	0.00305666	Hmcn1	vCM1	Two-sided Wilcoxon test	0.25	25
1.35795e-07	0.424439	0.684	0.644	0.00316008	Nsmce2	vCM1	Two-sided Wilcoxon test	0.25	25
1.37406e-07	0.439146	0.535	0.417	0.00319757	Usp37	vCM1	Two-sided Wilcoxon test	0.25	25
1.47978e-07	0.467584	0.423	0.302	0.00344361	Atm	vCM1	Two-sided Wilcoxon test	0.25	25
1.49105e-07	0.38243	0.456	0.319	0.00346982	Hltf	vCM1	Two-sided Wilcoxon test	0.25	25
1.52753e-07	0.328807	0.898	0.841	0.00355472	Rbm25	vCM1	Two-sided Wilcoxon test	0.25	25
1.61014e-07	0.689836	0.251	0.125	0.00374695	Bmpr1b	vCM1	Two-sided Wilcoxon test	0.25	25
1.61589e-07	0.41697	0.456	0.333	0.00376033	Nup205	vCM1	Two-sided Wilcoxon test	0.25	25
1.67691e-07	0.448907	0.502	0.367	0.00390234	Cpeb2	vCM1	Two-sided Wilcoxon test	0.25	25
1.68357e-07	0.385163	0.693	0.605	0.00391784	Arhgef12	vCM1	Two-sided Wilcoxon test	0.25	25
2.00314e-07	0.377394	0.716	0.627	0.00466152	Arl15	vCM1	Two-sided Wilcoxon test	0.25	25
2.05896e-07	0.386835	0.595	0.486	0.0047914	Clasp2	vCM1	Two-sided Wilcoxon test	0.25	25
2.08047e-07	0.453501	0.577	0.493	0.00484147	Smc5	vCM1	Two-sided Wilcoxon test	0.25	25
2.17444e-07	0.402352	0.549	0.414	0.00506015	Fnip2	vCM1	Two-sided Wilcoxon test	0.25	25
2.19244e-07	0.430621	0.651	0.608	0.00510202	Ckap5	vCM1	Two-sided Wilcoxon test	0.25	25
2.21434e-07	0.391692	0.353	0.218	0.00515298	Rttn	vCM1	Two-sided Wilcoxon test	0.25	25
2.31175e-07	0.448749	0.567	0.462	0.00537966	Uck2	vCM1	Two-sided Wilcoxon test	0.25	25
2.38415e-07	0.416799	0.684	0.595	0.00554816	Ptk2	vCM1	Two-sided Wilcoxon test	0.25	25
2.48648e-07	0.402812	0.665	0.548	0.0057863	Lrrtm3	vCM1	Two-sided Wilcoxon test	0.25	25
2.53808e-07	0.369263	0.465	0.332	0.00590636	Piezo1	vCM1	Two-sided Wilcoxon test	0.25	25
2.54002e-07	0.407011	0.74	0.709	0.00591088	Smarcc1	vCM1	Two-sided Wilcoxon test	0.25	25
2.60423e-07	0.317939	0.777	0.683	0.00606029	Igf2bp2	vCM1	Two-sided Wilcoxon test	0.25	25
2.68838e-07	0.382609	0.726	0.655	0.00625614	Rsf1	vCM1	Two-sided Wilcoxon test	0.25	25
2.69929e-07	0.443092	0.484	0.359	0.00628153	Ammecr1	vCM1	Two-sided Wilcoxon test	0.25	25
2.76155e-07	0.33073	0.823	0.763	0.00642641	Prpf40a	vCM1	Two-sided Wilcoxon test	0.25	25
2.78504e-07	0.398264	0.707	0.648	0.00648108	Neo1	vCM1	Two-sided Wilcoxon test	0.25	25
2.84278e-07	0.352651	0.312	0.177	0.00661544	Lypd6	vCM1	Two-sided Wilcoxon test	0.25	25
2.85395e-07	0.3709	0.972	0.92	0.00664142	Palld	vCM1	Two-sided Wilcoxon test	0.25	25
2.94852e-07	0.422177	0.391	0.261	0.00686151	Trim71	vCM1	Two-sided Wilcoxon test	0.25	25
3.02334e-07	0.353676	0.321	0.182	0.0070356	Gm26749	vCM1	Two-sided Wilcoxon test	0.25	25
3.03003e-07	0.34119	0.577	0.444	0.00705118	Med13l	vCM1	Two-sided Wilcoxon test	0.25	25
3.03756e-07	0.379721	0.46	0.331	0.0070687	Eif2ak4	vCM1	Two-sided Wilcoxon test	0.25	25
3.20758e-07	0.316684	0.367	0.235	0.00746437	Proser1	vCM1	Two-sided Wilcoxon test	0.25	25
3.2777e-07	0.451754	0.647	0.562	0.00762754	Atp13a3	vCM1	Two-sided Wilcoxon test	0.25	25
3.27982e-07	0.395176	0.651	0.547	0.00763246	Jph2	vCM1	Two-sided Wilcoxon test	0.25	25
3.29167e-07	0.383869	0.47	0.342	0.00766005	Wee1	vCM1	Two-sided Wilcoxon test	0.25	25
3.30394e-07	0.436448	0.628	0.534	0.0076886	Csnk1g1	vCM1	Two-sided Wilcoxon test	0.25	25
3.46971e-07	0.4352	0.609	0.532	0.00807436	Chd1	vCM1	Two-sided Wilcoxon test	0.25	25
3.69229e-07	0.395159	0.558	0.453	0.00859233	Aak1	vCM1	Two-sided Wilcoxon test	0.25	25
3.7487e-07	0.307097	0.433	0.289	0.0087236	A630012P03Rik	vCM1	Two-sided Wilcoxon test	0.25	25
3.76698e-07	0.433634	0.614	0.519	0.00876614	Fcho2	vCM1	Two-sided Wilcoxon test	0.25	25
3.77241e-07	0.365423	0.647	0.567	0.00877877	Nmt2	vCM1	Two-sided Wilcoxon test	0.25	25
4.03691e-07	0.406218	0.34	0.204	0.00939429	Ncapg2	vCM1	Two-sided Wilcoxon test	0.25	25
4.19105e-07	0.379551	0.507	0.376	0.00975299	Igsf3	vCM1	Two-sided Wilcoxon test	0.25	25
4.20917e-07	0.399181	0.353	0.216	0.00979516	Brca1	vCM1	Two-sided Wilcoxon test	0.25	25
4.22171e-07	0.477414	0.47	0.345	0.00982434	Trps1	vCM1	Two-sided Wilcoxon test	0.25	25
4.29866e-07	0.449652	0.535	0.43	0.0100034	Dido1	vCM1	Two-sided Wilcoxon test	0.25	25
4.36877e-07	0.394105	0.586	0.48	0.0101666	Zmym2	vCM1	Two-sided Wilcoxon test	0.25	25
4.41046e-07	0.452084	0.665	0.603	0.0102636	Memo1	vCM1	Two-sided Wilcoxon test	0.25	25
4.65245e-07	0.382306	0.591	0.485	0.0108267	Zfp654	vCM1	Two-sided Wilcoxon test	0.25	25
4.89407e-07	0.441434	0.647	0.558	0.011389	Fars2	vCM1	Two-sided Wilcoxon test	0.25	25
4.94033e-07	0.326601	0.8	0.787	0.0114966	Ewsr1	vCM1	Two-sided Wilcoxon test	0.25	25
5.02089e-07	0.349556	0.353	0.224	0.0116841	Myo9b	vCM1	Two-sided Wilcoxon test	0.25	25
5.13837e-07	0.47947	0.553	0.447	0.0119575	Fign	vCM1	Two-sided Wilcoxon test	0.25	25
5.38646e-07	0.367969	0.409	0.284	0.0125348	Nbas	vCM1	Two-sided Wilcoxon test	0.25	25
5.5713e-07	0.430625	0.507	0.398	0.012965	Ankfy1	vCM1	Two-sided Wilcoxon test	0.25	25
5.64519e-07	0.40125	0.688	0.611	0.0131369	Ccny	vCM1	Two-sided Wilcoxon test	0.25	25
5.92376e-07	0.470854	0.633	0.565	0.0137852	Trim44	vCM1	Two-sided Wilcoxon test	0.25	25
5.95113e-07	0.353211	0.581	0.45	0.0138489	Cask	vCM1	Two-sided Wilcoxon test	0.25	25
6.31789e-07	0.360113	0.4	0.27	0.0147024	Stxbp5	vCM1	Two-sided Wilcoxon test	0.25	25
6.64054e-07	0.370054	0.591	0.504	0.0154532	Stk24	vCM1	Two-sided Wilcoxon test	0.25	25
6.76856e-07	0.344964	0.27	0.146	0.0157511	Bard1	vCM1	Two-sided Wilcoxon test	0.25	25
6.82752e-07	0.4033	0.4	0.271	0.0158883	Lin52	vCM1	Two-sided Wilcoxon test	0.25	25
6.96202e-07	0.396203	0.419	0.3	0.0162013	Cdk5rap2	vCM1	Two-sided Wilcoxon test	0.25	25
7.07431e-07	0.337944	0.684	0.599	0.0164626	Syne2	vCM1	Two-sided Wilcoxon test	0.25	25
7.84761e-07	0.456986	0.591	0.517	0.0182622	Arhgap21	vCM1	Two-sided Wilcoxon test	0.25	25
8.20593e-07	0.383486	0.758	0.704	0.019096	Mapk1	vCM1	Two-sided Wilcoxon test	0.25	25
8.23388e-07	0.351973	0.847	0.796	0.0191611	Nasp	vCM1	Two-sided Wilcoxon test	0.25	25
8.89839e-07	0.27734	0.326	0.194	0.0207075	Mlxip	vCM1	Two-sided Wilcoxon test	0.25	25
8.92752e-07	0.404469	0.563	0.454	0.0207752	Nr6a1	vCM1	Two-sided Wilcoxon test	0.25	25
9.43437e-07	0.35437	0.321	0.201	0.0219547	Ell	vCM1	Two-sided Wilcoxon test	0.25	25
9.47676e-07	0.399192	0.279	0.159	0.0220534	Sobp	vCM1	Two-sided Wilcoxon test	0.25	25
1.05371e-06	0.369236	0.586	0.476	0.024521	Rreb1	vCM1	Two-sided Wilcoxon test	0.25	25
1.0875e-06	0.33448	0.609	0.514	0.0253071	Epc2	vCM1	Two-sided Wilcoxon test	0.25	25
1.09413e-06	0.447454	0.54	0.426	0.0254616	Smyd3	vCM1	Two-sided Wilcoxon test	0.25	25
1.09685e-06	0.27975	0.251	0.13	0.0255247	Ube4bos1	vCM1	Two-sided Wilcoxon test	0.25	25
1.13411e-06	0.338708	0.781	0.739	0.0263918	Picalm	vCM1	Two-sided Wilcoxon test	0.25	25
1.2222e-06	0.45248	0.628	0.551	0.0284418	Shoc2	vCM1	Two-sided Wilcoxon test	0.25	25
1.24086e-06	0.41846	0.553	0.453	0.0288761	Itsn1	vCM1	Two-sided Wilcoxon test	0.25	25
1.24788e-06	0.331278	0.74	0.647	0.0290394	Lcor	vCM1	Two-sided Wilcoxon test	0.25	25
1.29468e-06	0.45146	0.614	0.514	0.0301285	Colec12	vCM1	Two-sided Wilcoxon test	0.25	25
1.30397e-06	0.491038	0.623	0.549	0.0303447	Nrp1	vCM1	Two-sided Wilcoxon test	0.25	25
1.31452e-06	0.419643	0.54	0.44	0.0305902	Gab1	vCM1	Two-sided Wilcoxon test	0.25	25
1.31631e-06	0.424872	0.586	0.503	0.0306319	Ehbp1	vCM1	Two-sided Wilcoxon test	0.25	25
1.32792e-06	0.361198	0.535	0.396	0.030902	Arhgap26	vCM1	Two-sided Wilcoxon test	0.25	25
1.35098e-06	0.398024	0.447	0.324	0.0314387	E130307A14Rik	vCM1	Two-sided Wilcoxon test	0.25	25
1.351e-06	0.477692	0.47	0.371	0.0314392	Arid4a	vCM1	Two-sided Wilcoxon test	0.25	25
1.35183e-06	0.489953	0.544	0.457	0.0314585	Rcor1	vCM1	Two-sided Wilcoxon test	0.25	25
1.38592e-06	0.434999	0.577	0.49	0.0322518	Cspp1	vCM1	Two-sided Wilcoxon test	0.25	25
1.39475e-06	0.374125	0.567	0.473	0.0324572	Zzz3	vCM1	Two-sided Wilcoxon test	0.25	25
1.48912e-06	0.323963	0.34	0.215	0.0346533	Vrk2	vCM1	Two-sided Wilcoxon test	0.25	25
1.61468e-06	0.318448	0.526	0.399	0.0375752	Med14	vCM1	Two-sided Wilcoxon test	0.25	25
1.61804e-06	0.409206	0.674	0.564	0.0376535	Usp28	vCM1	Two-sided Wilcoxon test	0.25	25
1.65283e-06	0.419163	0.623	0.54	0.038463	Smurf2	vCM1	Two-sided Wilcoxon test	0.25	25
1.65501e-06	0.439129	0.54	0.436	0.0385138	Kmt2a	vCM1	Two-sided Wilcoxon test	0.25	25
1.68305e-06	0.262828	0.265	0.145	0.0391662	Pram1	vCM1	Two-sided Wilcoxon test	0.25	25
1.74298e-06	0.275445	0.274	0.152	0.0405608	Pole	vCM1	Two-sided Wilcoxon test	0.25	25
1.76363e-06	0.388224	0.642	0.522	0.0410415	Maml3	vCM1	Two-sided Wilcoxon test	0.25	25
1.78234e-06	0.501957	0.46	0.352	0.0414767	Hells	vCM1	Two-sided Wilcoxon test	0.25	25
1.79075e-06	0.470894	0.656	0.578	0.0416725	Top2a	vCM1	Two-sided Wilcoxon test	0.25	25
1.79932e-06	0.425347	0.581	0.487	0.041872	Myo1e	vCM1	Two-sided Wilcoxon test	0.25	25
1.83556e-06	0.430038	0.665	0.585	0.0427154	Zcchc7	vCM1	Two-sided Wilcoxon test	0.25	25
1.91865e-06	0.36956	0.851	0.819	0.044649	Atrx	vCM1	Two-sided Wilcoxon test	0.25	25
1.92063e-06	0.428048	0.637	0.57	0.0446949	Erc1	vCM1	Two-sided Wilcoxon test	0.25	25
1.96007e-06	0.390615	0.488	0.386	0.0456127	Msh3	vCM1	Two-sided Wilcoxon test	0.25	25
2.04851e-06	0.433029	0.521	0.408	0.0476709	Gm47283	vCM1	Two-sided Wilcoxon test	0.25	25
2.07568e-06	0.459817	0.433	0.325	0.0483032	Pcnt	vCM1	Two-sided Wilcoxon test	0.25	25
2.11711e-06	0.425252	0.53	0.427	0.0492672	Diaph2	vCM1	Two-sided Wilcoxon test	0.25	25
2.14162e-06	0.454099	0.442	0.339	0.0498377	Gsdme	vCM1	Two-sided Wilcoxon test	0.25	25
2.22471e-06	0.38704	0.679	0.615	0.0517712	Nckap1	vCM1	Two-sided Wilcoxon test	0.25	25
2.34444e-06	0.390214	0.591	0.509	0.0545575	Tmem164	vCM1	Two-sided Wilcoxon test	0.25	25
2.35611e-06	0.402065	0.395	0.265	0.0548291	Flnb	vCM1	Two-sided Wilcoxon test	0.25	25
2.37649e-06	0.394338	0.33	0.21	0.0553033	Wdhd1	vCM1	Two-sided Wilcoxon test	0.25	25
2.4068e-06	0.374807	0.521	0.398	0.0560086	Trerf1	vCM1	Two-sided Wilcoxon test	0.25	25
2.41342e-06	0.496798	0.544	0.482	0.0561628	AW554918	vCM1	Two-sided Wilcoxon test	0.25	25
2.48749e-06	0.360063	0.623	0.525	0.0578865	Tbl1xr1	vCM1	Two-sided Wilcoxon test	0.25	25
2.50568e-06	0.341451	0.405	0.28	0.0583096	Lemd3	vCM1	Two-sided Wilcoxon test	0.25	25
2.53288e-06	0.326649	0.381	0.263	0.0589427	Ncapd2	vCM1	Two-sided Wilcoxon test	0.25	25
2.64941e-06	0.347255	0.674	0.629	0.0616544	Smarca4	vCM1	Two-sided Wilcoxon test	0.25	25
2.65354e-06	0.435851	0.372	0.252	0.0617506	Ccdc138	vCM1	Two-sided Wilcoxon test	0.25	25
2.69476e-06	0.379624	0.712	0.668	0.0627097	Cnot4	vCM1	Two-sided Wilcoxon test	0.25	25
2.70128e-06	0.397649	0.623	0.542	0.0628614	Bmpr2	vCM1	Two-sided Wilcoxon test	0.25	25
2.7295e-06	0.37163	0.605	0.495	0.0635182	Cgnl1	vCM1	Two-sided Wilcoxon test	0.25	25
2.73462e-06	0.406103	0.67	0.582	0.0636373	Arid1b	vCM1	Two-sided Wilcoxon test	0.25	25
2.7832e-06	0.406502	0.33	0.213	0.064768	Arhgef3	vCM1	Two-sided Wilcoxon test	0.25	25
2.85297e-06	0.386404	0.609	0.531	0.0663916	9930021J03Rik	vCM1	Two-sided Wilcoxon test	0.25	25
2.90622e-06	0.345637	0.549	0.433	0.0676306	Sec24a	vCM1	Two-sided Wilcoxon test	0.25	25
3.07773e-06	0.276348	0.833	0.787	0.0716219	Tut4	vCM1	Two-sided Wilcoxon test	0.25	25
3.08411e-06	0.376407	0.595	0.486	0.0717703	Frs2	vCM1	Two-sided Wilcoxon test	0.25	25
3.12398e-06	0.341254	0.288	0.168	0.072698	Gas2	vCM1	Two-sided Wilcoxon test	0.25	25
3.12501e-06	0.323015	0.391	0.262	0.072722	Itga1	vCM1	Two-sided Wilcoxon test	0.25	25
3.1577e-06	0.358158	0.605	0.524	0.0734827	Pias2	vCM1	Two-sided Wilcoxon test	0.25	25
3.19567e-06	0.367207	0.572	0.492	0.0743663	Reps1	vCM1	Two-sided Wilcoxon test	0.25	25
3.2008e-06	0.324492	0.614	0.525	0.0744858	Exoc5	vCM1	Two-sided Wilcoxon test	0.25	25
3.20385e-06	0.426822	0.344	0.233	0.0745569	Haus6	vCM1	Two-sided Wilcoxon test	0.25	25
3.26728e-06	0.416238	0.372	0.254	0.076033	Abcc9	vCM1	Two-sided Wilcoxon test	0.25	25
3.26927e-06	0.420296	0.6	0.514	0.0760793	Adgrl2	vCM1	Two-sided Wilcoxon test	0.25	25
3.43504e-06	0.451597	0.447	0.345	0.0799368	Dgcr2	vCM1	Two-sided Wilcoxon test	0.25	25
3.56052e-06	0.43213	0.442	0.325	0.0828568	Gmds	vCM1	Two-sided Wilcoxon test	0.25	25
3.58338e-06	0.394666	0.577	0.501	0.0833888	Snx24	vCM1	Two-sided Wilcoxon test	0.25	25
3.66336e-06	0.400386	0.558	0.458	0.0852501	Mpp5	vCM1	Two-sided Wilcoxon test	0.25	25
3.73532e-06	0.305784	0.265	0.152	0.0869245	Ggact	vCM1	Two-sided Wilcoxon test	0.25	25
3.73605e-06	0.318864	0.623	0.56	0.0869417	Ppp4r3a	vCM1	Two-sided Wilcoxon test	0.25	25
3.83513e-06	0.406784	0.553	0.454	0.0892473	Lrch1	vCM1	Two-sided Wilcoxon test	0.25	25
3.84295e-06	0.362642	0.744	0.692	0.0894292	Lims1	vCM1	Two-sided Wilcoxon test	0.25	25
3.86166e-06	0.360357	0.433	0.331	0.0898647	Rsbn1	vCM1	Two-sided Wilcoxon test	0.25	25
3.88703e-06	0.418547	0.363	0.243	0.0904551	Dleu2	vCM1	Two-sided Wilcoxon test	0.25	25
3.89021e-06	0.405093	0.572	0.498	0.0905291	Lrp6	vCM1	Two-sided Wilcoxon test	0.25	25
3.90592e-06	0.306833	0.391	0.263	0.0908947	Tmem243	vCM1	Two-sided Wilcoxon test	0.25	25
3.92397e-06	0.310454	0.605	0.504	0.0913147	Ubr2	vCM1	Two-sided Wilcoxon test	0.25	25
3.92822e-06	0.375213	0.614	0.538	0.0914137	Rngtt	vCM1	Two-sided Wilcoxon test	0.25	25
3.97774e-06	0.378995	0.535	0.452	0.0925659	Tbc1d1	vCM1	Two-sided Wilcoxon test	0.25	25
4.11557e-06	0.408507	0.647	0.571	0.0957734	Herc1	vCM1	Two-sided Wilcoxon test	0.25	25
4.15226e-06	0.420056	0.595	0.519	0.0966273	Fam168a	vCM1	Two-sided Wilcoxon test	0.25	25
4.16596e-06	0.426617	0.674	0.61	0.0969459	Mlip	vCM1	Two-sided Wilcoxon test	0.25	25
4.16602e-06	0.391544	0.605	0.558	0.0969475	Ago2	vCM1	Two-sided Wilcoxon test	0.25	25
4.22752e-06	0.391092	0.54	0.444	0.0983786	Hmbox1	vCM1	Two-sided Wilcoxon test	0.25	25
4.34514e-06	0.312982	0.767	0.682	0.101116	Mical2	vCM1	Two-sided Wilcoxon test	0.25	25
4.44863e-06	0.30681	0.498	0.383	0.103524	Rnf217	vCM1	Two-sided Wilcoxon test	0.25	25
4.60304e-06	0.385518	0.419	0.304	0.107117	Nat10	vCM1	Two-sided Wilcoxon test	0.25	25
4.79436e-06	0.381687	0.572	0.496	0.11157	Map4k5	vCM1	Two-sided Wilcoxon test	0.25	25
4.90851e-06	0.427293	0.391	0.274	0.114226	Kif4	vCM1	Two-sided Wilcoxon test	0.25	25
4.9644e-06	0.275363	0.786	0.725	0.115526	Pbrm1	vCM1	Two-sided Wilcoxon test	0.25	25
5.20145e-06	0.34483	0.405	0.279	0.121043	Grk5	vCM1	Two-sided Wilcoxon test	0.25	25
5.21331e-06	0.488075	0.447	0.345	0.121319	Ttll5	vCM1	Two-sided Wilcoxon test	0.25	25
5.58804e-06	0.266071	0.633	0.533	0.130039	Hecw2	vCM1	Two-sided Wilcoxon test	0.25	25
5.68758e-06	0.326704	0.6	0.527	0.132356	Cwc27	vCM1	Two-sided Wilcoxon test	0.25	25
5.72997e-06	0.338993	0.623	0.549	0.133342	Usp13	vCM1	Two-sided Wilcoxon test	0.25	25
5.81581e-06	0.377645	0.405	0.304	0.13534	B4galt6	vCM1	Two-sided Wilcoxon test	0.25	25
5.91617e-06	0.339549	0.507	0.405	0.137675	Phrf1	vCM1	Two-sided Wilcoxon test	0.25	25
6.07153e-06	0.482277	0.46	0.371	0.141291	D10Wsu102e	vCM1	Two-sided Wilcoxon test	0.25	25
6.07265e-06	0.296736	0.665	0.588	0.141317	Slc38a1	vCM1	Two-sided Wilcoxon test	0.25	25
6.20159e-06	0.349085	0.647	0.571	0.144317	Arfgef1	vCM1	Two-sided Wilcoxon test	0.25	25
6.21896e-06	0.365679	0.363	0.24	0.144721	Fancc	vCM1	Two-sided Wilcoxon test	0.25	25
6.41461e-06	0.472693	0.54	0.45	0.149274	Acaca	vCM1	Two-sided Wilcoxon test	0.25	25
6.54637e-06	0.359637	0.405	0.291	0.152341	2610020C07Rik	vCM1	Two-sided Wilcoxon test	0.25	25
6.67683e-06	0.362722	0.377	0.262	0.155376	Mphosph9	vCM1	Two-sided Wilcoxon test	0.25	25
6.83248e-06	0.301298	0.735	0.689	0.158999	Rad23b	vCM1	Two-sided Wilcoxon test	0.25	25
6.87221e-06	0.372821	0.456	0.352	0.159923	Npat	vCM1	Two-sided Wilcoxon test	0.25	25
6.99777e-06	0.372357	0.633	0.552	0.162845	Ncoa1	vCM1	Two-sided Wilcoxon test	0.25	25
7.15347e-06	0.362869	0.316	0.208	0.166468	Lin54	vCM1	Two-sided Wilcoxon test	0.25	25
7.29205e-06	0.462106	0.395	0.289	0.169693	Eml5	vCM1	Two-sided Wilcoxon test	0.25	25
7.42077e-06	0.409693	0.581	0.507	0.172689	Xrn1	vCM1	Two-sided Wilcoxon test	0.25	25
7.49559e-06	0.340166	0.777	0.748	0.17443	Ythdc1	vCM1	Two-sided Wilcoxon test	0.25	25
7.75107e-06	0.346324	0.651	0.58	0.180375	Qrich1	vCM1	Two-sided Wilcoxon test	0.25	25
7.76838e-06	0.426412	0.484	0.402	0.180778	Dnm2	vCM1	Two-sided Wilcoxon test	0.25	25
7.99566e-06	0.357698	0.642	0.56	0.186067	Ambra1	vCM1	Two-sided Wilcoxon test	0.25	25
8.07949e-06	0.304125	0.274	0.162	0.188018	Mastl	vCM1	Two-sided Wilcoxon test	0.25	25
8.09383e-06	0.322741	0.33	0.211	0.188351	Stil	vCM1	Two-sided Wilcoxon test	0.25	25
8.14048e-06	0.352718	0.46	0.36	0.189437	Usp33	vCM1	Two-sided Wilcoxon test	0.25	25
8.14972e-06	0.335786	0.363	0.252	0.189652	Alms1	vCM1	Two-sided Wilcoxon test	0.25	25
8.2137e-06	0.336258	0.353	0.246	0.191141	Nup133	vCM1	Two-sided Wilcoxon test	0.25	25
8.28549e-06	0.329481	0.688	0.68	0.192812	Kcmf1	vCM1	Two-sided Wilcoxon test	0.25	25
8.469e-06	0.376822	0.66	0.593	0.197082	Zfp280d	vCM1	Two-sided Wilcoxon test	0.25	25
8.52066e-06	0.362493	0.284	0.176	0.198284	Gfod1	vCM1	Two-sided Wilcoxon test	0.25	25
8.5906e-06	0.320842	0.567	0.497	0.199912	Ap1g1	vCM1	Two-sided Wilcoxon test	0.25	25
8.59645e-06	0.315664	0.6	0.488	0.200048	Lgr4	vCM1	Two-sided Wilcoxon test	0.25	25
8.60829e-06	0.505666	0.349	0.235	0.200324	Clspn	vCM1	Two-sided Wilcoxon test	0.25	25
8.6416e-06	0.312169	0.763	0.736	0.201099	Npepps	vCM1	Two-sided Wilcoxon test	0.25	25
8.91135e-06	0.478288	0.535	0.442	0.207376	Mthfd1l	vCM1	Two-sided Wilcoxon test	0.25	25
9.03939e-06	0.52374	0.688	0.575	0.210356	Dmd	vCM1	Two-sided Wilcoxon test	0.25	25
9.15871e-06	0.379411	0.484	0.379	0.213132	Cecr2	vCM1	Two-sided Wilcoxon test	0.25	25
9.23039e-06	0.358658	0.437	0.33	0.2148	St3gal3	vCM1	Two-sided Wilcoxon test	0.25	25
9.2656e-06	0.313823	0.656	0.556	0.21562	Rassf8	vCM1	Two-sided Wilcoxon test	0.25	25
9.31677e-06	0.281808	0.312	0.196	0.21681	Kif20b	vCM1	Two-sided Wilcoxon test	0.25	25
9.32538e-06	0.33625	0.851	0.79	0.217011	Clic4	vCM1	Two-sided Wilcoxon test	0.25	25
9.47743e-06	0.270425	0.312	0.191	0.220549	Gm36198	vCM1	Two-sided Wilcoxon test	0.25	25
9.57164e-06	0.282813	0.251	0.145	0.222742	Ttk	vCM1	Two-sided Wilcoxon test	0.25	25
9.61176e-06	0.356924	0.609	0.538	0.223675	Herc4	vCM1	Two-sided Wilcoxon test	0.25	25
9.66002e-06	0.282006	0.586	0.474	0.224798	Atp9b	vCM1	Two-sided Wilcoxon test	0.25	25
9.66343e-06	0.321816	0.684	0.626	0.224878	Nup98	vCM1	Two-sided Wilcoxon test	0.25	25
9.80273e-06	0.439677	0.591	0.533	0.228119	Commd10	vCM1	Two-sided Wilcoxon test	0.25	25
9.93124e-06	0.260212	0.26	0.151	0.23111	Uhrf1bp1	vCM1	Two-sided Wilcoxon test	0.25	25
1.00245e-05	0.409027	0.647	0.599	0.233281	Csnk1g3	vCM1	Two-sided Wilcoxon test	0.25	25
1.0147e-05	0.429475	0.377	0.275	0.236131	Rfwd3	vCM1	Two-sided Wilcoxon test	0.25	25
1.0148e-05	0.413912	0.516	0.432	0.236154	Zfp516	vCM1	Two-sided Wilcoxon test	0.25	25
1.02051e-05	0.351598	0.512	0.397	0.237483	Odf2	vCM1	Two-sided Wilcoxon test	0.25	25
1.0718e-05	0.401999	0.358	0.245	0.249419	Gulp1	vCM1	Two-sided Wilcoxon test	0.25	25
1.07356e-05	0.325873	0.656	0.563	0.249829	Plxna4	vCM1	Two-sided Wilcoxon test	0.25	25
1.08379e-05	0.369273	0.419	0.31	0.252208	Togaram1	vCM1	Two-sided Wilcoxon test	0.25	25
1.10764e-05	0.343318	0.698	0.669	0.257758	Sbno1	vCM1	Two-sided Wilcoxon test	0.25	25
1.19805e-05	0.308236	0.66	0.639	0.278797	Suz12	vCM1	Two-sided Wilcoxon test	0.25	25
1.21163e-05	0.380077	0.349	0.232	0.281959	Npas3	vCM1	Two-sided Wilcoxon test	0.25	25
1.28504e-05	0.309441	0.633	0.541	0.299043	Usp32	vCM1	Two-sided Wilcoxon test	0.25	25
1.35689e-05	0.342288	0.619	0.533	0.315763	Trim33	vCM1	Two-sided Wilcoxon test	0.25	25
1.36178e-05	0.353893	0.493	0.388	0.3169	Fbxw7	vCM1	Two-sided Wilcoxon test	0.25	25
1.43792e-05	0.440987	0.484	0.38	0.334619	Immp2l	vCM1	Two-sided Wilcoxon test	0.25	25
1.53304e-05	0.348813	0.498	0.381	0.356754	Gm16599	vCM1	Two-sided Wilcoxon test	0.25	25
1.61881e-05	0.405669	0.423	0.336	0.376713	Rbm4b	vCM1	Two-sided Wilcoxon test	0.25	25
1.71153e-05	0.296969	0.823	0.755	0.398291	Foxp1	vCM1	Two-sided Wilcoxon test	0.25	25
1.75296e-05	0.545315	0.498	0.411	0.407931	Tmtc2	vCM1	Two-sided Wilcoxon test	0.25	25
1.85268e-05	0.417576	0.414	0.319	0.431136	Kdm4b	vCM1	Two-sided Wilcoxon test	0.25	25
1.87153e-05	0.281926	0.693	0.608	0.435525	Ubn2	vCM1	Two-sided Wilcoxon test	0.25	25
1.88239e-05	0.334917	0.842	0.825	0.43805	Ube2k	vCM1	Two-sided Wilcoxon test	0.25	25
1.90421e-05	0.333073	0.679	0.619	0.443128	Gatad2b	vCM1	Two-sided Wilcoxon test	0.25	25
1.90887e-05	0.250508	0.293	0.174	0.444214	Gm19710	vCM1	Two-sided Wilcoxon test	0.25	25
1.92133e-05	0.356391	0.628	0.58	0.447113	Tusc3	vCM1	Two-sided Wilcoxon test	0.25	25
1.9361e-05	0.283969	0.856	0.843	0.450551	Prrc2c	vCM1	Two-sided Wilcoxon test	0.25	25
1.93904e-05	0.392052	0.419	0.314	0.451233	Arhgef11	vCM1	Two-sided Wilcoxon test	0.25	25
1.93951e-05	0.337117	0.507	0.406	0.451344	Lama4	vCM1	Two-sided Wilcoxon test	0.25	25
1.98657e-05	0.366654	0.595	0.537	0.462295	Atf2	vCM1	Two-sided Wilcoxon test	0.25	25
2.00889e-05	0.350879	0.558	0.486	0.467488	Map4k3	vCM1	Two-sided Wilcoxon test	0.25	25
2.03541e-05	0.312838	0.642	0.611	0.473661	Gpbp1	vCM1	Two-sided Wilcoxon test	0.25	25
2.09553e-05	0.290873	0.721	0.683	0.48765	Map4k4	vCM1	Two-sided Wilcoxon test	0.25	25
2.15493e-05	0.331813	0.363	0.257	0.501474	Nup107	vCM1	Two-sided Wilcoxon test	0.25	25
2.24573e-05	0.371143	0.549	0.492	0.522603	Sipa1l2	vCM1	Two-sided Wilcoxon test	0.25	25
2.28305e-05	0.278956	0.726	0.693	0.531289	Cpsf6	vCM1	Two-sided Wilcoxon test	0.25	25
2.3079e-05	0.350543	0.572	0.494	0.53707	Dnajc13	vCM1	Two-sided Wilcoxon test	0.25	25
2.36836e-05	0.386433	0.367	0.266	0.55114	Elf4	vCM1	Two-sided Wilcoxon test	0.25	25
2.38879e-05	0.350984	0.405	0.302	0.555896	Naa25	vCM1	Two-sided Wilcoxon test	0.25	25
2.47786e-05	0.43673	0.516	0.456	0.576623	Relch	vCM1	Two-sided Wilcoxon test	0.25	25
2.49425e-05	0.282444	0.828	0.76	0.580437	Akap13	vCM1	Two-sided Wilcoxon test	0.25	25
2.54692e-05	0.330159	0.521	0.434	0.592694	Peli1	vCM1	Two-sided Wilcoxon test	0.25	25
2.59548e-05	0.377007	0.526	0.465	0.603993	Elp1	vCM1	Two-sided Wilcoxon test	0.25	25
2.60054e-05	0.318504	0.637	0.559	0.605172	Usp3	vCM1	Two-sided Wilcoxon test	0.25	25
2.65171e-05	0.424531	0.595	0.54	0.61708	Dnajc1	vCM1	Two-sided Wilcoxon test	0.25	25
2.67164e-05	0.314602	0.688	0.606	0.621717	Phf21a	vCM1	Two-sided Wilcoxon test	0.25	25
2.68315e-05	0.473098	0.335	0.23	0.624396	Cdkl5	vCM1	Two-sided Wilcoxon test	0.25	25
2.74569e-05	0.307817	0.349	0.242	0.63895	Bora	vCM1	Two-sided Wilcoxon test	0.25	25
2.79036e-05	0.3307	0.619	0.558	0.649344	Sec63	vCM1	Two-sided Wilcoxon test	0.25	25
2.84257e-05	0.363626	0.544	0.462	0.661493	Mast2	vCM1	Two-sided Wilcoxon test	0.25	25
2.86109e-05	0.385337	0.749	0.717	0.665805	Slc38a2	vCM1	Two-sided Wilcoxon test	0.25	25
2.93961e-05	0.317613	0.479	0.393	0.684077	Anapc1	vCM1	Two-sided Wilcoxon test	0.25	25
2.978e-05	0.25181	0.665	0.589	0.693011	Rfc1	vCM1	Two-sided Wilcoxon test	0.25	25
2.99853e-05	0.3504	0.577	0.504	0.697787	Rasa1	vCM1	Two-sided Wilcoxon test	0.25	25
3.00061e-05	0.315451	0.702	0.654	0.698273	Taf1d	vCM1	Two-sided Wilcoxon test	0.25	25
3.0384e-05	0.334561	0.591	0.522	0.707067	Usp25	vCM1	Two-sided Wilcoxon test	0.25	25
3.06487e-05	0.500346	0.437	0.34	0.713225	Tiam1	vCM1	Two-sided Wilcoxon test	0.25	25
3.09696e-05	0.348733	0.479	0.385	0.720694	Pex14	vCM1	Two-sided Wilcoxon test	0.25	25
3.09833e-05	0.335612	0.693	0.599	0.721012	Sptan1	vCM1	Two-sided Wilcoxon test	0.25	25
3.12074e-05	0.335726	0.609	0.562	0.726227	Kdm5c	vCM1	Two-sided Wilcoxon test	0.25	25
3.21566e-05	0.335554	0.502	0.42	0.748317	Stau1	vCM1	Two-sided Wilcoxon test	0.25	25
3.27435e-05	0.354434	0.651	0.601	0.761974	Tpp2	vCM1	Two-sided Wilcoxon test	0.25	25
3.27496e-05	0.286468	0.684	0.641	0.762115	Glg1	vCM1	Two-sided Wilcoxon test	0.25	25
3.33615e-05	0.348069	0.395	0.3	0.776354	Vps50	vCM1	Two-sided Wilcoxon test	0.25	25
3.42053e-05	0.347572	0.298	0.196	0.795991	Mbnl3	vCM1	Two-sided Wilcoxon test	0.25	25
3.44087e-05	0.325493	0.74	0.671	0.800725	Runx1t1	vCM1	Two-sided Wilcoxon test	0.25	25
3.7821e-05	0.300437	0.47	0.348	0.880132	Pdgfd	vCM1	Two-sided Wilcoxon test	0.25	25
3.79642e-05	0.360912	0.437	0.335	0.883465	Sil1	vCM1	Two-sided Wilcoxon test	0.25	25
3.87724e-05	0.280075	0.753	0.724	0.902272	Zfp292	vCM1	Two-sided Wilcoxon test	0.25	25
3.92434e-05	0.363894	0.521	0.431	0.913234	Nav1	vCM1	Two-sided Wilcoxon test	0.25	25
3.96875e-05	0.353893	0.572	0.489	0.923568	Etl4	vCM1	Two-sided Wilcoxon test	0.25	25
4.0478e-05	0.346997	0.651	0.601	0.941963	Xpo1	vCM1	Two-sided Wilcoxon test	0.25	25
4.22693e-05	0.354859	0.284	0.18	0.983648	Tns3	vCM1	Two-sided Wilcoxon test	0.25	25
4.29253e-05	0.35537	0.433	0.331	0.998914	Srbd1	vCM1	Two-sided Wilcoxon test	0.25	25
4.43465e-05	0.311946	0.316	0.213	1	Med23	vCM1	Two-sided Wilcoxon test	0.25	25
4.48493e-05	0.264412	0.721	0.628	1	Maml2	vCM1	Two-sided Wilcoxon test	0.25	25
4.83922e-05	0.30163	0.298	0.201	1	Nsun6	vCM1	Two-sided Wilcoxon test	0.25	25
5.09649e-05	0.367735	0.707	0.668	1	Camta1	vCM1	Two-sided Wilcoxon test	0.25	25
5.15821e-05	0.28145	0.837	0.787	1	Celf1	vCM1	Two-sided Wilcoxon test	0.25	25
5.24973e-05	0.295086	0.712	0.65	1	Tnrc6a	vCM1	Two-sided Wilcoxon test	0.25	25
5.39901e-05	0.33246	0.53	0.467	1	Slf2	vCM1	Two-sided Wilcoxon test	0.25	25
5.51895e-05	0.348575	0.4	0.298	1	Kirrel	vCM1	Two-sided Wilcoxon test	0.25	25
5.68679e-05	0.326327	0.558	0.479	1	Ahcyl2	vCM1	Two-sided Wilcoxon test	0.25	25
5.88273e-05	0.373345	0.46	0.378	1	Mark2	vCM1	Two-sided Wilcoxon test	0.25	25
6.17788e-05	0.338985	0.6	0.545	1	Zfp638	vCM1	Two-sided Wilcoxon test	0.25	25
6.30677e-05	0.251076	0.758	0.701	1	Dhx36	vCM1	Two-sided Wilcoxon test	0.25	25
6.51144e-05	0.284947	0.326	0.218	1	Cachd1	vCM1	Two-sided Wilcoxon test	0.25	25
6.53926e-05	0.332014	0.405	0.312	1	Ppp4r1	vCM1	Two-sided Wilcoxon test	0.25	25
6.66489e-05	0.252049	0.265	0.162	1	Gm28375	vCM1	Two-sided Wilcoxon test	0.25	25
6.68067e-05	0.279883	0.665	0.614	1	Spats2	vCM1	Two-sided Wilcoxon test	0.25	25
7.02721e-05	0.366713	0.437	0.352	1	Nfatc3	vCM1	Two-sided Wilcoxon test	0.25	25
7.22433e-05	0.330051	0.326	0.227	1	Heca	vCM1	Two-sided Wilcoxon test	0.25	25
7.36876e-05	0.296726	0.46	0.363	1	Supt3	vCM1	Two-sided Wilcoxon test	0.25	25
7.38846e-05	0.322325	0.595	0.54	1	Dmxl1	vCM1	Two-sided Wilcoxon test	0.25	25
7.46071e-05	0.323141	0.367	0.27	1	Sclt1	vCM1	Two-sided Wilcoxon test	0.25	25
7.75505e-05	0.313443	0.735	0.707	1	Dhx9	vCM1	Two-sided Wilcoxon test	0.25	25
7.88871e-05	0.325515	0.558	0.51	1	Mtrex	vCM1	Two-sided Wilcoxon test	0.25	25
7.91463e-05	0.312531	0.521	0.447	1	Rnf4	vCM1	Two-sided Wilcoxon test	0.25	25
8.324e-05	0.396028	0.451	0.365	1	Snx13	vCM1	Two-sided Wilcoxon test	0.25	25
8.35811e-05	0.252522	0.86	0.81	1	Ncor1	vCM1	Two-sided Wilcoxon test	0.25	25
8.4458e-05	0.252058	0.809	0.767	1	Svil	vCM1	Two-sided Wilcoxon test	0.25	25
8.62926e-05	0.263792	0.312	0.213	1	Ints9	vCM1	Two-sided Wilcoxon test	0.25	25
8.68703e-05	0.270119	0.67	0.611	1	Appbp2	vCM1	Two-sided Wilcoxon test	0.25	25
8.81837e-05	0.343658	0.53	0.483	1	Otud4	vCM1	Two-sided Wilcoxon test	0.25	25
9.10887e-05	0.26575	0.637	0.556	1	Ghr	vCM1	Two-sided Wilcoxon test	0.25	25
9.1429e-05	0.292669	0.642	0.568	1	Kidins220	vCM1	Two-sided Wilcoxon test	0.25	25
9.2532e-05	0.353011	0.526	0.457	1	Atp11b	vCM1	Two-sided Wilcoxon test	0.25	25
9.32411e-05	0.318224	0.544	0.465	1	Prkaa2	vCM1	Two-sided Wilcoxon test	0.25	25
9.72795e-05	0.255696	0.795	0.696	1	Homer2	vCM1	Two-sided Wilcoxon test	0.25	25
0.000101374	0.318672	0.749	0.696	1	Spag9	vCM1	Two-sided Wilcoxon test	0.25	25
0.000102118	0.288826	0.288	0.197	1	Timeless	vCM1	Two-sided Wilcoxon test	0.25	25
0.000102764	0.311551	0.563	0.517	1	Rnf216	vCM1	Two-sided Wilcoxon test	0.25	25
0.000103765	0.338845	0.512	0.417	1	Spred2	vCM1	Two-sided Wilcoxon test	0.25	25
0.000104467	0.320616	0.34	0.244	1	Lin9	vCM1	Two-sided Wilcoxon test	0.25	25
0.000109554	0.397542	0.474	0.396	1	Nrf1	vCM1	Two-sided Wilcoxon test	0.25	25
0.00011005	0.313696	0.814	0.775	1	Mbnl2	vCM1	Two-sided Wilcoxon test	0.25	25
0.000112001	0.274063	0.777	0.743	1	Mtdh	vCM1	Two-sided Wilcoxon test	0.25	25
0.000113086	0.325627	0.53	0.454	1	Agap1	vCM1	Two-sided Wilcoxon test	0.25	25
0.000113413	0.291981	0.623	0.575	1	Ptbp3	vCM1	Two-sided Wilcoxon test	0.25	25
0.000116534	0.313131	0.512	0.431	1	Cabin1	vCM1	Two-sided Wilcoxon test	0.25	25
0.000118851	0.3877	0.535	0.483	1	Wdr70	vCM1	Two-sided Wilcoxon test	0.25	25
0.000118886	0.267505	0.684	0.604	1	Sgms1	vCM1	Two-sided Wilcoxon test	0.25	25
0.000123008	0.302798	0.563	0.489	1	Slc4a7	vCM1	Two-sided Wilcoxon test	0.25	25
0.000123729	0.294286	0.535	0.458	1	Tmem135	vCM1	Two-sided Wilcoxon test	0.25	25
0.000124182	0.34156	0.53	0.462	1	Hivep2	vCM1	Two-sided Wilcoxon test	0.25	25
0.000124809	0.331985	0.395	0.304	1	Baz1a	vCM1	Two-sided Wilcoxon test	0.25	25
0.000124961	0.280048	0.73	0.688	1	Cnot2	vCM1	Two-sided Wilcoxon test	0.25	25
0.000129285	0.307513	0.381	0.275	1	P2ry14	vCM1	Two-sided Wilcoxon test	0.25	25
0.000133698	0.287421	0.4	0.3	1	Depdc5	vCM1	Two-sided Wilcoxon test	0.25	25
0.00013634	0.363237	0.47	0.39	1	Usp6nl	vCM1	Two-sided Wilcoxon test	0.25	25
0.000136862	0.399282	0.488	0.415	1	Scaper	vCM1	Two-sided Wilcoxon test	0.25	25
0.000146209	0.298689	0.656	0.59	1	Aplp2	vCM1	Two-sided Wilcoxon test	0.25	25
0.000146763	0.30676	0.614	0.566	1	Ccdc88a	vCM1	Two-sided Wilcoxon test	0.25	25
0.000148589	0.358779	0.423	0.352	1	Taf3	vCM1	Two-sided Wilcoxon test	0.25	25
0.000149092	0.282179	0.633	0.563	1	Numb	vCM1	Two-sided Wilcoxon test	0.25	25
0.000149491	0.292567	0.679	0.656	1	Brwd1	vCM1	Two-sided Wilcoxon test	0.25	25
0.000151484	0.292596	0.535	0.469	1	Tnpo3	vCM1	Two-sided Wilcoxon test	0.25	25
0.000159574	0.265062	0.647	0.608	1	Fam168b	vCM1	Two-sided Wilcoxon test	0.25	25
0.000160268	0.325424	0.484	0.413	1	Ubr1	vCM1	Two-sided Wilcoxon test	0.25	25
0.000164106	0.297429	0.4	0.3	1	Gm15614	vCM1	Two-sided Wilcoxon test	0.25	25
0.000166213	0.341525	0.307	0.212	1	Scfd2	vCM1	Two-sided Wilcoxon test	0.25	25
0.000168192	0.288793	0.526	0.455	1	Rnf111	vCM1	Two-sided Wilcoxon test	0.25	25
0.000169135	0.449766	0.423	0.356	1	Ppp1r10	vCM1	Two-sided Wilcoxon test	0.25	25
0.000174834	0.325756	0.553	0.496	1	Cdc42se2	vCM1	Two-sided Wilcoxon test	0.25	25
0.000178768	0.255325	0.744	0.686	1	Akap9	vCM1	Two-sided Wilcoxon test	0.25	25
0.000179777	0.272531	0.349	0.257	1	Uggt2	vCM1	Two-sided Wilcoxon test	0.25	25
0.000180374	0.258734	0.665	0.613	1	Pawr	vCM1	Two-sided Wilcoxon test	0.25	25
0.000182704	0.295491	0.46	0.373	1	Tbc1d23	vCM1	Two-sided Wilcoxon test	0.25	25
0.00019124	0.320692	0.563	0.501	1	Cwf19l2	vCM1	Two-sided Wilcoxon test	0.25	25
0.000191988	0.307149	0.47	0.388	1	Kank1	vCM1	Two-sided Wilcoxon test	0.25	25
0.000194062	0.304282	0.623	0.574	1	Fbxo11	vCM1	Two-sided Wilcoxon test	0.25	25
0.000200471	0.373905	0.419	0.332	1	Larp1b	vCM1	Two-sided Wilcoxon test	0.25	25
0.000200548	0.345861	0.488	0.435	1	Kat7	vCM1	Two-sided Wilcoxon test	0.25	25
0.00020205	0.290717	0.558	0.49	1	Raf1	vCM1	Two-sided Wilcoxon test	0.25	25
0.000205139	0.269748	0.312	0.216	1	Ctif	vCM1	Two-sided Wilcoxon test	0.25	25
0.000206843	0.297809	0.414	0.325	1	Mcm9	vCM1	Two-sided Wilcoxon test	0.25	25
0.000207619	0.28902	0.516	0.452	1	March6	vCM1	Two-sided Wilcoxon test	0.25	25
0.000210168	0.34683	0.53	0.487	1	Cop1	vCM1	Two-sided Wilcoxon test	0.25	25
0.000211308	0.29614	0.591	0.54	1	Uhrf2	vCM1	Two-sided Wilcoxon test	0.25	25
0.000211989	0.352987	0.358	0.27	1	Tjp2	vCM1	Two-sided Wilcoxon test	0.25	25
0.00021618	0.333032	0.563	0.507	1	Zdhhc20	vCM1	Two-sided Wilcoxon test	0.25	25
0.000217854	0.360307	0.358	0.276	1	Tasor	vCM1	Two-sided Wilcoxon test	0.25	25
0.000221586	0.380538	0.414	0.336	1	Fam117b	vCM1	Two-sided Wilcoxon test	0.25	25
0.000223234	0.322439	0.623	0.585	1	Ythdf3	vCM1	Two-sided Wilcoxon test	0.25	25
0.000225542	0.322245	0.628	0.571	1	Klhdc10	vCM1	Two-sided Wilcoxon test	0.25	25
0.000233588	0.274345	0.647	0.603	1	Pspc1	vCM1	Two-sided Wilcoxon test	0.25	25
0.000234278	0.345392	0.377	0.296	1	Gcn1	vCM1	Two-sided Wilcoxon test	0.25	25
0.000243457	0.356094	0.498	0.427	1	Zfp462	vCM1	Two-sided Wilcoxon test	0.25	25
0.000244585	0.277359	0.628	0.567	1	Mprip	vCM1	Two-sided Wilcoxon test	0.25	25
0.000245234	0.250629	0.66	0.623	1	Tcerg1	vCM1	Two-sided Wilcoxon test	0.25	25
0.000248054	0.308097	0.358	0.267	1	Knl1	vCM1	Two-sided Wilcoxon test	0.25	25
0.000253177	0.261437	0.433	0.344	1	Fam91a1	vCM1	Two-sided Wilcoxon test	0.25	25
0.00025398	0.361416	0.488	0.425	1	Bcl2	vCM1	Two-sided Wilcoxon test	0.25	25
0.000253984	0.304251	0.628	0.596	1	Matr3	vCM1	Two-sided Wilcoxon test	0.25	25
0.000255411	0.415669	0.46	0.41	1	Nup93	vCM1	Two-sided Wilcoxon test	0.25	25
0.000257537	0.409348	0.437	0.363	1	Prr14l	vCM1	Two-sided Wilcoxon test	0.25	25
0.00026358	0.283882	0.423	0.34	1	Terf1	vCM1	Two-sided Wilcoxon test	0.25	25
0.000268336	0.283099	0.66	0.616	1	Elf2	vCM1	Two-sided Wilcoxon test	0.25	25
0.000270436	0.358786	0.47	0.391	1	Thada	vCM1	Two-sided Wilcoxon test	0.25	25
0.000270766	0.269004	0.312	0.23	1	Nup188	vCM1	Two-sided Wilcoxon test	0.25	25
0.000282769	0.285956	0.344	0.258	1	G2e3	vCM1	Two-sided Wilcoxon test	0.25	25
0.000284684	0.297642	0.544	0.472	1	Ank2	vCM1	Two-sided Wilcoxon test	0.25	25
0.000292632	0.308929	0.381	0.298	1	Baiap2l1	vCM1	Two-sided Wilcoxon test	0.25	25
0.000294343	0.328787	0.614	0.539	1	Hdac9	vCM1	Two-sided Wilcoxon test	0.25	25
0.000300323	0.309437	0.586	0.528	1	Arhgef7	vCM1	Two-sided Wilcoxon test	0.25	25
0.000304625	0.268307	0.26	0.174	1	5430405H02Rik	vCM1	Two-sided Wilcoxon test	0.25	25
0.000309191	0.263356	0.595	0.532	1	Fndc3a	vCM1	Two-sided Wilcoxon test	0.25	25
0.000311946	0.30936	0.465	0.397	1	Mecp2	vCM1	Two-sided Wilcoxon test	0.25	25
0.000316292	0.256491	0.284	0.197	1	Rps6kc1	vCM1	Two-sided Wilcoxon test	0.25	25
0.000318608	0.435857	0.53	0.463	1	Hs6st2	vCM1	Two-sided Wilcoxon test	0.25	25
0.000324483	0.351756	0.572	0.535	1	Evl	vCM1	Two-sided Wilcoxon test	0.25	25
0.000324828	0.283836	0.47	0.394	1	Ubp1	vCM1	Two-sided Wilcoxon test	0.25	25
0.000327489	0.264527	0.684	0.676	1	Hectd1	vCM1	Two-sided Wilcoxon test	0.25	25
0.000327579	0.396951	0.414	0.341	1	Asap2	vCM1	Two-sided Wilcoxon test	0.25	25
0.000335123	0.286123	0.367	0.274	1	Rab31	vCM1	Two-sided Wilcoxon test	0.25	25
0.000337521	0.267666	0.609	0.56	1	Zfp148	vCM1	Two-sided Wilcoxon test	0.25	25
0.000349318	0.286045	0.344	0.253	1	Zfat	vCM1	Two-sided Wilcoxon test	0.25	25
0.000353064	0.311396	0.619	0.567	1	Tlk2	vCM1	Two-sided Wilcoxon test	0.25	25
0.000362681	0.290635	0.521	0.468	1	Fbxw11	vCM1	Two-sided Wilcoxon test	0.25	25
0.000384149	0.295582	0.493	0.437	1	Nup214	vCM1	Two-sided Wilcoxon test	0.25	25
0.000390404	0.285235	0.437	0.361	1	Cpsf7	vCM1	Two-sided Wilcoxon test	0.25	25
0.000391018	0.268271	0.474	0.395	1	Nid2	vCM1	Two-sided Wilcoxon test	0.25	25
0.000392989	0.256803	0.577	0.478	1	Epha7	vCM1	Two-sided Wilcoxon test	0.25	25
0.000397912	0.287973	0.484	0.411	1	Eps15l1	vCM1	Two-sided Wilcoxon test	0.25	25
0.000400722	0.33029	0.349	0.267	1	Camsap1	vCM1	Two-sided Wilcoxon test	0.25	25
0.000405023	0.379208	0.535	0.507	1	Mboat2	vCM1	Two-sided Wilcoxon test	0.25	25
0.000406247	0.320819	0.4	0.333	1	Uggt1	vCM1	Two-sided Wilcoxon test	0.25	25
0.000408047	0.277382	0.633	0.562	1	Atxn2	vCM1	Two-sided Wilcoxon test	0.25	25
0.000418443	0.345317	0.586	0.542	1	Inpp5a	vCM1	Two-sided Wilcoxon test	0.25	25
0.000420199	0.260284	0.553	0.492	1	Osbpl9	vCM1	Two-sided Wilcoxon test	0.25	25
0.000427724	0.310162	0.451	0.39	1	Pcf11	vCM1	Two-sided Wilcoxon test	0.25	25
0.000427849	0.270152	0.442	0.363	1	Uhrf1bp1l	vCM1	Two-sided Wilcoxon test	0.25	25
0.000429356	0.322956	0.456	0.397	1	Cand1	vCM1	Two-sided Wilcoxon test	0.25	25
0.000435833	0.336655	0.619	0.588	1	Dnajc19	vCM1	Two-sided Wilcoxon test	0.25	25
0.000452539	0.396356	0.493	0.444	1	Ubxn7	vCM1	Two-sided Wilcoxon test	0.25	25
0.000463301	0.287085	0.312	0.223	1	Cdc14a	vCM1	Two-sided Wilcoxon test	0.25	25
0.000463955	0.337119	0.647	0.599	1	Sorbs1	vCM1	Two-sided Wilcoxon test	0.25	25
0.00047208	0.276046	0.54	0.481	1	Hdgfl3	vCM1	Two-sided Wilcoxon test	0.25	25
0.000473362	0.317102	0.623	0.584	1	Sf1	vCM1	Two-sided Wilcoxon test	0.25	25
0.000474933	0.271909	0.498	0.425	1	Raph1	vCM1	Two-sided Wilcoxon test	0.25	25
0.000486807	0.274182	0.498	0.433	1	Sfswap	vCM1	Two-sided Wilcoxon test	0.25	25
0.000489778	0.252895	0.284	0.199	1	Farp2	vCM1	Two-sided Wilcoxon test	0.25	25
0.00049194	0.314583	0.312	0.228	1	Pik3cb	vCM1	Two-sided Wilcoxon test	0.25	25
0.000492667	0.286825	0.684	0.662	1	Wapl	vCM1	Two-sided Wilcoxon test	0.25	25
0.000494538	0.368389	0.526	0.484	1	Zfc3h1	vCM1	Two-sided Wilcoxon test	0.25	25
0.000508883	0.264589	0.512	0.439	1	Shroom3	vCM1	Two-sided Wilcoxon test	0.25	25
0.000515334	0.253031	0.605	0.525	1	Kcng2	vCM1	Two-sided Wilcoxon test	0.25	25
0.000534502	0.274025	0.279	0.19	1	Sorcs2	vCM1	Two-sided Wilcoxon test	0.25	25
0.000535412	0.276672	0.507	0.429	1	Plag1	vCM1	Two-sided Wilcoxon test	0.25	25
0.000538346	0.293323	0.358	0.277	1	Slc9a8	vCM1	Two-sided Wilcoxon test	0.25	25
0.000544876	0.368872	0.367	0.3	1	Usp48	vCM1	Two-sided Wilcoxon test	0.25	25
0.00054565	0.295852	0.488	0.422	1	Cbfa2t2	vCM1	Two-sided Wilcoxon test	0.25	25
0.000550346	0.323092	0.33	0.246	1	Mad1l1	vCM1	Two-sided Wilcoxon test	0.25	25
0.00055043	0.334116	0.381	0.317	1	Emsy	vCM1	Two-sided Wilcoxon test	0.25	25
0.000555124	0.322803	0.535	0.497	1	Snrnp48	vCM1	Two-sided Wilcoxon test	0.25	25
0.000567847	0.305213	0.53	0.479	1	Agps	vCM1	Two-sided Wilcoxon test	0.25	25
0.000567885	0.263693	0.688	0.664	1	Rlf	vCM1	Two-sided Wilcoxon test	0.25	25
0.000572764	0.293837	0.586	0.554	1	Wdr43	vCM1	Two-sided Wilcoxon test	0.25	25
0.000573612	0.252868	0.316	0.231	1	Rad18	vCM1	Two-sided Wilcoxon test	0.25	25
0.000581044	0.38349	0.34	0.27	1	Slc39a11	vCM1	Two-sided Wilcoxon test	0.25	25
0.000586778	0.300543	0.66	0.622	1	Nxn	vCM1	Two-sided Wilcoxon test	0.25	25
0.000591317	0.316317	0.591	0.553	1	Ube4b	vCM1	Two-sided Wilcoxon test	0.25	25
0.000593268	0.365863	0.474	0.415	1	Gm15283	vCM1	Two-sided Wilcoxon test	0.25	25
0.000593969	0.267002	0.33	0.247	1	Sesn1	vCM1	Two-sided Wilcoxon test	0.25	25
0.000594359	0.336647	0.456	0.402	1	Kdm3b	vCM1	Two-sided Wilcoxon test	0.25	25
0.000595442	0.292923	0.288	0.194	1	Dgki	vCM1	Two-sided Wilcoxon test	0.25	25
0.000602827	0.255094	0.614	0.574	1	Adnp	vCM1	Two-sided Wilcoxon test	0.25	25
0.000608429	0.296707	0.623	0.595	1	Smc4	vCM1	Two-sided Wilcoxon test	0.25	25
0.00060988	0.292799	0.344	0.261	1	Hace1	vCM1	Two-sided Wilcoxon test	0.25	25
0.000612157	0.306698	0.456	0.385	1	Iqgap1	vCM1	Two-sided Wilcoxon test	0.25	25
0.000628029	0.317168	0.405	0.337	1	Cenpc1	vCM1	Two-sided Wilcoxon test	0.25	25
0.000633471	0.305895	0.577	0.542	1	Tab2	vCM1	Two-sided Wilcoxon test	0.25	25
0.00063601	0.311128	0.502	0.451	1	Ubr4	vCM1	Two-sided Wilcoxon test	0.25	25
0.000641666	0.279966	0.516	0.448	1	Camk2g	vCM1	Two-sided Wilcoxon test	0.25	25
0.000643591	0.32586	0.377	0.305	1	Pdss2	vCM1	Two-sided Wilcoxon test	0.25	25
0.000643744	0.305304	0.507	0.454	1	Arnt	vCM1	Two-sided Wilcoxon test	0.25	25
0.000675648	0.331765	0.549	0.508	1	Dennd5a	vCM1	Two-sided Wilcoxon test	0.25	25
0.000716682	0.29406	0.544	0.5	1	Gtf2h1	vCM1	Two-sided Wilcoxon test	0.25	25
0.000716698	0.31919	0.433	0.382	1	Baz2a	vCM1	Two-sided Wilcoxon test	0.25	25
0.000720137	0.270388	0.344	0.265	1	Ttc37	vCM1	Two-sided Wilcoxon test	0.25	25
0.000725363	0.331469	0.609	0.579	1	Cul3	vCM1	Two-sided Wilcoxon test	0.25	25
0.000728644	0.5475	0.498	0.438	1	Lrmda	vCM1	Two-sided Wilcoxon test	0.25	25
0.000767403	0.27598	0.391	0.31	1	Brd1	vCM1	Two-sided Wilcoxon test	0.25	25
0.000772281	0.271332	0.54	0.507	1	Lsm14a	vCM1	Two-sided Wilcoxon test	0.25	25
0.000803998	0.332639	0.558	0.503	1	Nedd4l	vCM1	Two-sided Wilcoxon test	0.25	25
0.000830672	0.296119	0.526	0.469	1	Rbm27	vCM1	Two-sided Wilcoxon test	0.25	25
0.000845282	0.318887	0.609	0.581	1	Phf14	vCM1	Two-sided Wilcoxon test	0.25	25
0.000851244	0.287129	0.628	0.618	1	Rbbp6	vCM1	Two-sided Wilcoxon test	0.25	25
0.000881031	0.334884	0.647	0.627	1	Atad2b	vCM1	Two-sided Wilcoxon test	0.25	25
0.000904969	0.320748	0.465	0.414	1	Senp5	vCM1	Two-sided Wilcoxon test	0.25	25
0.000910532	0.379162	0.502	0.456	1	Ubl3	vCM1	Two-sided Wilcoxon test	0.25	25
0.000913825	0.307362	0.274	0.199	1	Zfp398	vCM1	Two-sided Wilcoxon test	0.25	25
0.000921695	0.330468	0.372	0.307	1	Fbrsl1	vCM1	Two-sided Wilcoxon test	0.25	25
0.000995455	0.351557	0.493	0.437	1	Srgap2	vCM1	Two-sided Wilcoxon test	0.25	25
0.00107444	0.284917	0.372	0.305	1	Kdm2b	vCM1	Two-sided Wilcoxon test	0.25	25
0.0010824	0.25695	0.716	0.689	1	Pak2	vCM1	Two-sided Wilcoxon test	0.25	25
0.00108653	0.265162	0.33	0.254	1	Tapt1	vCM1	Two-sided Wilcoxon test	0.25	25
0.00108847	0.257329	0.395	0.32	1	Umad1	vCM1	Two-sided Wilcoxon test	0.25	25
0.0011406	0.324652	0.674	0.694	1	Brd4	vCM1	Two-sided Wilcoxon test	0.25	25
0.0011414	0.297807	0.302	0.226	1	Anln	vCM1	Two-sided Wilcoxon test	0.25	25
0.00116511	0.437526	0.298	0.225	1	Ptpn14	vCM1	Two-sided Wilcoxon test	0.25	25
0.00118607	0.310044	0.433	0.375	1	Zc3h7a	vCM1	Two-sided Wilcoxon test	0.25	25
0.0012115	0.258357	0.521	0.467	1	Htt	vCM1	Two-sided Wilcoxon test	0.25	25
0.00124309	0.260452	0.558	0.512	1	Klf7	vCM1	Two-sided Wilcoxon test	0.25	25
0.00125297	0.309864	0.474	0.431	1	Nvl	vCM1	Two-sided Wilcoxon test	0.25	25
0.00129823	0.349473	0.363	0.3	1	Cep68	vCM1	Two-sided Wilcoxon test	0.25	25
0.0013007	0.273929	0.312	0.238	1	Fancm	vCM1	Two-sided Wilcoxon test	0.25	25
0.00132912	0.275438	0.53	0.478	1	Pdcd4	vCM1	Two-sided Wilcoxon test	0.25	25
0.00134966	0.333796	0.465	0.415	1	Pacs1	vCM1	Two-sided Wilcoxon test	0.25	25
0.00140865	0.317882	0.316	0.246	1	Zranb3	vCM1	Two-sided Wilcoxon test	0.25	25
0.00142182	0.285298	0.693	0.668	1	Fam49b	vCM1	Two-sided Wilcoxon test	0.25	25
0.00142712	0.2514	0.451	0.366	1	B3galt1	vCM1	Two-sided Wilcoxon test	0.25	25
0.00144936	0.342751	0.619	0.598	1	Actn4	vCM1	Two-sided Wilcoxon test	0.25	25
0.00145308	0.256509	0.395	0.325	1	Dtnb	vCM1	Two-sided Wilcoxon test	0.25	25
0.001466	0.328405	0.488	0.443	1	Ptpn13	vCM1	Two-sided Wilcoxon test	0.25	25
0.00149206	0.385719	0.493	0.448	1	Map2k5	vCM1	Two-sided Wilcoxon test	0.25	25
0.00150272	0.28266	0.265	0.185	1	Cnksr2	vCM1	Two-sided Wilcoxon test	0.25	25
0.00152387	0.254446	0.284	0.214	1	Msl2	vCM1	Two-sided Wilcoxon test	0.25	25
0.00153893	0.344351	0.4	0.345	1	Slf1	vCM1	Two-sided Wilcoxon test	0.25	25
0.00156515	0.272989	0.298	0.217	1	5730522E02Rik	vCM1	Two-sided Wilcoxon test	0.25	25
0.00156719	0.255992	0.674	0.667	1	Taf15	vCM1	Two-sided Wilcoxon test	0.25	25
0.00160049	0.251288	0.74	0.721	1	Sltm	vCM1	Two-sided Wilcoxon test	0.25	25
0.00160648	0.291908	0.46	0.41	1	Dcbld2	vCM1	Two-sided Wilcoxon test	0.25	25
0.00161542	0.312687	0.377	0.313	1	Blm	vCM1	Two-sided Wilcoxon test	0.25	25
0.00161567	0.287786	0.572	0.545	1	Babam2	vCM1	Two-sided Wilcoxon test	0.25	25
0.00161988	0.303642	0.516	0.489	1	Bcor	vCM1	Two-sided Wilcoxon test	0.25	25
0.00165463	0.27362	0.428	0.366	1	Mfsd14a	vCM1	Two-sided Wilcoxon test	0.25	25
0.00173251	0.321806	0.409	0.349	1	Prkd3	vCM1	Two-sided Wilcoxon test	0.25	25
0.00181579	0.33565	0.363	0.297	1	Notch2	vCM1	Two-sided Wilcoxon test	0.25	25
0.00184635	0.311688	0.488	0.441	1	Sh3pxd2a	vCM1	Two-sided Wilcoxon test	0.25	25
0.00186783	0.286832	0.688	0.667	1	Hk2	vCM1	Two-sided Wilcoxon test	0.25	25
0.00186885	0.316424	0.498	0.463	1	Srsf4	vCM1	Two-sided Wilcoxon test	0.25	25
0.00187839	0.258336	0.54	0.509	1	Homer1	vCM1	Two-sided Wilcoxon test	0.25	25
0.00187896	0.331064	0.363	0.289	1	Smad6	vCM1	Two-sided Wilcoxon test	0.25	25
0.00188364	0.302746	0.567	0.518	1	Pde3a	vCM1	Two-sided Wilcoxon test	0.25	25
0.00188971	0.261299	0.279	0.207	1	E2f8	vCM1	Two-sided Wilcoxon test	0.25	25
0.00189014	0.265854	0.265	0.195	1	Shroom2	vCM1	Two-sided Wilcoxon test	0.25	25
0.00190752	0.301965	0.442	0.382	1	Tasor2	vCM1	Two-sided Wilcoxon test	0.25	25
0.00192351	0.269417	0.642	0.585	1	Tspan9	vCM1	Two-sided Wilcoxon test	0.25	25
0.00192742	0.269049	0.595	0.564	1	Acbd6	vCM1	Two-sided Wilcoxon test	0.25	25
0.00194218	0.339409	0.567	0.551	1	Pten	vCM1	Two-sided Wilcoxon test	0.25	25
0.00205304	0.266934	0.563	0.562	1	Cnot6	vCM1	Two-sided Wilcoxon test	0.25	25
0.00205642	0.2803	0.437	0.391	1	Snx27	vCM1	Two-sided Wilcoxon test	0.25	25
0.00207906	0.28288	0.335	0.264	1	Smad3	vCM1	Two-sided Wilcoxon test	0.25	25
0.00210621	0.250057	0.405	0.345	1	Hectd4	vCM1	Two-sided Wilcoxon test	0.25	25
0.00218349	0.277895	0.586	0.556	1	Dctn4	vCM1	Two-sided Wilcoxon test	0.25	25
0.00221081	0.255637	0.391	0.322	1	Ptpn12	vCM1	Two-sided Wilcoxon test	0.25	25
0.00225022	0.257939	0.34	0.271	1	AU040320	vCM1	Two-sided Wilcoxon test	0.25	25
0.00225433	0.262856	0.307	0.238	1	Cherp	vCM1	Two-sided Wilcoxon test	0.25	25
0.0022636	0.302434	0.409	0.348	1	Tbk1	vCM1	Two-sided Wilcoxon test	0.25	25
0.00226886	0.254556	0.265	0.197	1	Wipf2	vCM1	Two-sided Wilcoxon test	0.25	25
0.00228059	0.377922	0.312	0.24	1	Tgfbr3	vCM1	Two-sided Wilcoxon test	0.25	25
0.00230086	0.310966	0.414	0.349	1	Antxr2	vCM1	Two-sided Wilcoxon test	0.25	25
0.00237417	0.327667	0.451	0.389	1	Rps6ka5	vCM1	Two-sided Wilcoxon test	0.25	25
0.00247478	0.281221	0.493	0.458	1	Egln1	vCM1	Two-sided Wilcoxon test	0.25	25
0.00249909	0.360292	0.409	0.36	1	Cbl	vCM1	Two-sided Wilcoxon test	0.25	25
0.00252894	0.268266	0.363	0.294	1	Sash1	vCM1	Two-sided Wilcoxon test	0.25	25
0.00253084	0.267729	0.377	0.302	1	4632427E13Rik	vCM1	Two-sided Wilcoxon test	0.25	25
0.00254915	0.282781	0.572	0.567	1	Ilf3	vCM1	Two-sided Wilcoxon test	0.25	25
0.00256469	0.258479	0.465	0.382	1	Prc1	vCM1	Two-sided Wilcoxon test	0.25	25
0.00256994	0.2647	0.302	0.231	1	Dlg5	vCM1	Two-sided Wilcoxon test	0.25	25
0.00259434	0.306596	0.581	0.566	1	Cdc73	vCM1	Two-sided Wilcoxon test	0.25	25
0.00263612	0.299903	0.405	0.325	1	Fhit	vCM1	Two-sided Wilcoxon test	0.25	25
0.00268343	0.284563	0.321	0.251	1	Kat2b	vCM1	Two-sided Wilcoxon test	0.25	25
0.00276831	0.266718	0.53	0.488	1	Ppp4r3b	vCM1	Two-sided Wilcoxon test	0.25	25
0.00276896	0.28038	0.367	0.311	1	Fbxw8	vCM1	Two-sided Wilcoxon test	0.25	25
0.00279529	0.42113	0.4	0.348	1	Tnni3k	vCM1	Two-sided Wilcoxon test	0.25	25
0.002814	0.296434	0.567	0.537	1	Schip1	vCM1	Two-sided Wilcoxon test	0.25	25
0.00282692	0.271911	0.372	0.304	1	Firre	vCM1	Two-sided Wilcoxon test	0.25	25
0.00285265	0.330575	0.391	0.331	1	Mettl25	vCM1	Two-sided Wilcoxon test	0.25	25
0.00286382	0.315808	0.591	0.576	1	Pip5k1b	vCM1	Two-sided Wilcoxon test	0.25	25
0.00291829	0.294499	0.451	0.406	1	Rps6ka3	vCM1	Two-sided Wilcoxon test	0.25	25
0.00316503	0.295062	0.293	0.228	1	Atp11a	vCM1	Two-sided Wilcoxon test	0.25	25
0.00326432	0.264351	0.316	0.25	1	Polr1a	vCM1	Two-sided Wilcoxon test	0.25	25
0.00331253	0.263407	0.367	0.31	1	Prkdc	vCM1	Two-sided Wilcoxon test	0.25	25
0.00341123	0.262678	0.451	0.406	1	Cyfip1	vCM1	Two-sided Wilcoxon test	0.25	25
0.00342191	0.259601	0.442	0.387	1	Sos2	vCM1	Two-sided Wilcoxon test	0.25	25
0.00346956	0.296939	0.605	0.592	1	Hipk3	vCM1	Two-sided Wilcoxon test	0.25	25
0.0035174	0.27474	0.674	0.647	1	Wls	vCM1	Two-sided Wilcoxon test	0.25	25
0.00353417	0.293975	0.358	0.307	1	Ranbp3	vCM1	Two-sided Wilcoxon test	0.25	25
0.00363994	0.627443	0.428	0.387	1	Xist	vCM1	Two-sided Wilcoxon test	0.25	25
0.00364104	0.27352	0.409	0.351	1	Bmp5	vCM1	Two-sided Wilcoxon test	0.25	25
0.00365406	0.541608	0.442	0.397	1	Cdh13	vCM1	Two-sided Wilcoxon test	0.25	25
0.00368999	0.271371	0.526	0.468	1	Cblb	vCM1	Two-sided Wilcoxon test	0.25	25
0.00372943	0.295678	0.47	0.433	1	Lrch3	vCM1	Two-sided Wilcoxon test	0.25	25
0.00376723	0.277683	0.544	0.515	1	Uvrag	vCM1	Two-sided Wilcoxon test	0.25	25
0.0037817	0.298611	0.451	0.402	1	Gtf2ird1	vCM1	Two-sided Wilcoxon test	0.25	25
0.00381433	0.256075	0.6	0.605	1	Rabgap1	vCM1	Two-sided Wilcoxon test	0.25	25
0.00383064	0.275487	0.544	0.54	1	Rras2	vCM1	Two-sided Wilcoxon test	0.25	25
0.00384027	0.264519	0.377	0.299	1	Gm36975	vCM1	Two-sided Wilcoxon test	0.25	25
0.00385538	0.280249	0.409	0.361	1	Otulin	vCM1	Two-sided Wilcoxon test	0.25	25
0.00389644	0.3332	0.451	0.409	1	Slc38a10	vCM1	Two-sided Wilcoxon test	0.25	25
0.00405429	0.282393	0.307	0.246	1	Tns1	vCM1	Two-sided Wilcoxon test	0.25	25
0.0040932	0.294791	0.335	0.276	1	Tbc1d14	vCM1	Two-sided Wilcoxon test	0.25	25
0.0041387	0.266511	0.512	0.488	1	Brd8	vCM1	Two-sided Wilcoxon test	0.25	25
0.00416651	0.275154	0.665	0.646	1	Tcf25	vCM1	Two-sided Wilcoxon test	0.25	25
0.00418513	0.272694	0.395	0.349	1	Mbtps1	vCM1	Two-sided Wilcoxon test	0.25	25
0.00421751	0.287719	0.423	0.384	1	Mcmbp	vCM1	Two-sided Wilcoxon test	0.25	25
0.00424554	0.254566	0.6	0.593	1	St7	vCM1	Two-sided Wilcoxon test	0.25	25
0.00425145	0.273955	0.581	0.57	1	Gapvd1	vCM1	Two-sided Wilcoxon test	0.25	25
0.00429436	0.289192	0.558	0.532	1	Vti1a	vCM1	Two-sided Wilcoxon test	0.25	25
0.0043289	0.326967	0.395	0.337	1	Pik3ca	vCM1	Two-sided Wilcoxon test	0.25	25
0.00434377	0.264297	0.26	0.193	1	Greb1l	vCM1	Two-sided Wilcoxon test	0.25	25
0.00438083	0.267896	0.437	0.375	1	Insr	vCM1	Two-sided Wilcoxon test	0.25	25
0.00439502	0.271837	0.595	0.561	1	Map3k20	vCM1	Two-sided Wilcoxon test	0.25	25
0.00449042	0.270147	0.423	0.37	1	Rgl1	vCM1	Two-sided Wilcoxon test	0.25	25
0.00456813	0.262579	0.279	0.217	1	Skp2	vCM1	Two-sided Wilcoxon test	0.25	25
0.00479018	0.269687	0.507	0.449	1	Gab2	vCM1	Two-sided Wilcoxon test	0.25	25
0.00486939	0.268967	0.577	0.559	1	Taok1	vCM1	Two-sided Wilcoxon test	0.25	25
0.00488259	0.312003	0.405	0.364	1	Safb2	vCM1	Two-sided Wilcoxon test	0.25	25
0.00503045	0.313349	0.451	0.404	1	Rprd2	vCM1	Two-sided Wilcoxon test	0.25	25
0.0050907	0.273376	0.456	0.405	1	Mysm1	vCM1	Two-sided Wilcoxon test	0.25	25
0.00511127	0.31116	0.335	0.274	1	Lysmd4	vCM1	Two-sided Wilcoxon test	0.25	25
0.00519891	0.253517	0.391	0.334	1	Fam222b	vCM1	Two-sided Wilcoxon test	0.25	25
0.00520383	0.258269	0.381	0.329	1	1110051M20Rik	vCM1	Two-sided Wilcoxon test	0.25	25
0.00523977	0.279369	0.512	0.503	1	Hbs1l	vCM1	Two-sided Wilcoxon test	0.25	25
0.00525534	0.288367	0.493	0.47	1	Trip11	vCM1	Two-sided Wilcoxon test	0.25	25
0.00552753	0.257472	0.707	0.698	1	Filip1	vCM1	Two-sided Wilcoxon test	0.25	25
0.00559838	0.268626	0.405	0.357	1	Ipo9	vCM1	Two-sided Wilcoxon test	0.25	25
0.0057205	0.276826	0.474	0.437	1	Jmy	vCM1	Two-sided Wilcoxon test	0.25	25
0.00593502	0.262394	0.391	0.333	1	Armh3	vCM1	Two-sided Wilcoxon test	0.25	25
0.00604864	0.302942	0.433	0.391	1	Col18a1	vCM1	Two-sided Wilcoxon test	0.25	25
0.00613174	0.288432	0.344	0.292	1	Cep120	vCM1	Two-sided Wilcoxon test	0.25	25
0.00615723	0.295256	0.595	0.6	1	Igf2bp1	vCM1	Two-sided Wilcoxon test	0.25	25
0.00618612	0.2921	0.316	0.253	1	Lyn	vCM1	Two-sided Wilcoxon test	0.25	25
0.00622747	0.323837	0.433	0.38	1	Gse1	vCM1	Two-sided Wilcoxon test	0.25	25
0.00625351	0.314838	0.293	0.232	1	Efnb2	vCM1	Two-sided Wilcoxon test	0.25	25
0.00662205	0.264042	0.321	0.262	1	Fam189a2	vCM1	Two-sided Wilcoxon test	0.25	25
0.00688111	0.275331	0.284	0.218	1	Ctnnd2	vCM1	Two-sided Wilcoxon test	0.25	25
0.0069024	0.290516	0.321	0.265	1	Wdr20	vCM1	Two-sided Wilcoxon test	0.25	25
0.0070838	0.270911	0.395	0.34	1	Tet1	vCM1	Two-sided Wilcoxon test	0.25	25
0.00724289	0.283092	0.312	0.255	1	Usp40	vCM1	Two-sided Wilcoxon test	0.25	25
0.00751817	0.261268	0.381	0.33	1	Dgkd	vCM1	Two-sided Wilcoxon test	0.25	25
0.00773903	0.350866	0.484	0.477	1	Ppp2r5e	vCM1	Two-sided Wilcoxon test	0.25	25
0.00787311	0.269596	0.47	0.423	1	Cmip	vCM1	Two-sided Wilcoxon test	0.25	25
0.00840592	0.279446	0.437	0.406	1	Virma	vCM1	Two-sided Wilcoxon test	0.25	25
0.00893908	0.261033	0.609	0.6	1	Map4	vCM1	Two-sided Wilcoxon test	0.25	25
0.00898333	0.295148	0.428	0.404	1	Rnf8	vCM1	Two-sided Wilcoxon test	0.25	25
0.00903084	0.272276	0.256	0.196	1	Popdc3	vCM1	Two-sided Wilcoxon test	0.25	25
0.00918189	0.311077	0.367	0.317	1	Sdk2	vCM1	Two-sided Wilcoxon test	0.25	25
0.0092948	0.281872	0.567	0.581	1	Drg1	vCM1	Two-sided Wilcoxon test	0.25	25
0.00932969	0.253882	0.386	0.34	1	Taf1	vCM1	Two-sided Wilcoxon test	0.25	25
0.00949301	0.332128	0.437	0.412	1	Kif21a	vCM1	Two-sided Wilcoxon test	0.25	25
0.00949788	0.286557	0.33	0.281	1	Foxk2	vCM1	Two-sided Wilcoxon test	0.25	25
0.0095633	0.292664	0.46	0.427	1	Fer	vCM1	Two-sided Wilcoxon test	0.25	25
0.0098466	0.251043	0.633	0.633	1	Golga4	vCM1	Two-sided Wilcoxon test	0.25	25
0.00991831	0.25603	0.316	0.267	1	Trip4	vCM1	Two-sided Wilcoxon test	0.25	25
0.00993128	0.259063	0.581	0.58	1	E130308A19Rik	vCM1	Two-sided Wilcoxon test	0.25	25
1.21833e-55	2.05675	0.633	0.147	2.83518e-51	Kcnq3	aCM/AVC	Two-sided Wilcoxon test	0.25	25
2.68693e-44	1.98489	0.918	0.59	6.25275e-40	Slit3	aCM/AVC	Two-sided Wilcoxon test	0.25	25
1.97563e-45	1.69413	0.842	0.432	4.59748e-41	Tmem163	aCM/AVC	Two-sided Wilcoxon test	0.25	25
1.63343e-19	1.63285	0.734	0.515	3.80115e-15	Angpt1	aCM/AVC	Two-sided Wilcoxon test	0.25	25
2.9523e-47	1.59403	0.734	0.26	6.8703e-43	Sox5	aCM/AVC	Two-sided Wilcoxon test	0.25	25
5.80265e-47	1.58594	0.608	0.151	1.35034e-42	Trabd2b	aCM/AVC	Two-sided Wilcoxon test	0.25	25
1.408e-15	1.57594	0.494	0.246	3.27655e-11	Plcb1	aCM/AVC	Two-sided Wilcoxon test	0.25	25
1.72985e-49	1.55496	0.899	0.523	4.02554e-45	Cers6	aCM/AVC	Two-sided Wilcoxon test	0.25	25
3.57385e-44	1.52263	0.968	0.868	8.3167e-40	Pam	aCM/AVC	Two-sided Wilcoxon test	0.25	25
2.05256e-20	1.51383	0.892	0.76	4.77651e-16	Prkg1	aCM/AVC	Two-sided Wilcoxon test	0.25	25
2.88215e-20	1.42163	0.766	0.536	6.70706e-16	Nav2	aCM/AVC	Two-sided Wilcoxon test	0.25	25
1.63848e-52	1.41131	1	0.918	3.81291e-48	Ryr2	aCM/AVC	Two-sided Wilcoxon test	0.25	25
2.68376e-17	1.3854	0.506	0.246	6.24538e-13	Kcnd2	aCM/AVC	Two-sided Wilcoxon test	0.25	25
7.23361e-36	1.38355	0.892	0.59	1.68333e-31	Dach1	aCM/AVC	Two-sided Wilcoxon test	0.25	25
1.47166e-25	1.36818	0.88	0.559	3.4247e-21	Cacna1d	aCM/AVC	Two-sided Wilcoxon test	0.25	25
1.82868e-33	1.33699	0.918	0.669	4.25552e-29	Filip1	aCM/AVC	Two-sided Wilcoxon test	0.25	25
1.1294e-39	1.32871	0.962	0.774	2.62823e-35	Mast4	aCM/AVC	Two-sided Wilcoxon test	0.25	25
1.69236e-29	1.30624	0.886	0.608	3.93828e-25	Fras1	aCM/AVC	Two-sided Wilcoxon test	0.25	25
3.02608e-18	1.29787	0.316	0.092	7.04199e-14	Opcml	aCM/AVC	Two-sided Wilcoxon test	0.25	25
8.30521e-11	1.2845	0.506	0.31	1.93271e-06	Sema3a	aCM/AVC	Two-sided Wilcoxon test	0.25	25
6.69817e-28	1.27251	0.797	0.526	1.55873e-23	Adamts6	aCM/AVC	Two-sided Wilcoxon test	0.25	25
1.38813e-19	1.26616	0.861	0.733	3.23032e-15	Cald1	aCM/AVC	Two-sided Wilcoxon test	0.25	25
9.80664e-22	1.25062	0.848	0.619	2.2821e-17	Thsd4	aCM/AVC	Two-sided Wilcoxon test	0.25	25
3.09665e-09	1.24391	0.671	0.606	7.20621e-05	Kcnh7	aCM/AVC	Two-sided Wilcoxon test	0.25	25
1.58956e-19	1.23718	0.405	0.142	3.69906e-15	Hcn1	aCM/AVC	Two-sided Wilcoxon test	0.25	25
4.87832e-23	1.2345	0.842	0.536	1.13523e-18	Rgs6	aCM/AVC	Two-sided Wilcoxon test	0.25	25
2.55332e-34	1.21668	0.943	0.78	5.94184e-30	Vcl	aCM/AVC	Two-sided Wilcoxon test	0.25	25
3.38457e-14	1.16118	0.449	0.223	7.87622e-10	Kcnj3	aCM/AVC	Two-sided Wilcoxon test	0.25	25
9.05437e-15	1.15977	0.259	0.074	2.10704e-10	Fgf12	aCM/AVC	Two-sided Wilcoxon test	0.25	25
2.54126e-18	1.14716	0.899	0.778	5.91377e-14	5430431A17Rik	aCM/AVC	Two-sided Wilcoxon test	0.25	25
1.34504e-19	1.14367	0.747	0.512	3.13004e-15	Prkca	aCM/AVC	Two-sided Wilcoxon test	0.25	25
1.80827e-19	1.13165	0.791	0.58	4.20802e-15	Stat3	aCM/AVC	Two-sided Wilcoxon test	0.25	25
1.40675e-17	1.12004	0.905	0.727	3.27364e-13	Kcnq5	aCM/AVC	Two-sided Wilcoxon test	0.25	25
5.43603e-28	1.11445	0.785	0.496	1.26502e-23	Itpr1	aCM/AVC	Two-sided Wilcoxon test	0.25	25
3.78899e-26	1.10954	0.804	0.497	8.81736e-22	Mir99ahg	aCM/AVC	Two-sided Wilcoxon test	0.25	25
1.02125e-21	1.10807	0.785	0.599	2.37655e-17	Sphkap	aCM/AVC	Two-sided Wilcoxon test	0.25	25
8.73547e-28	1.10755	0.899	0.639	2.03283e-23	Spon1	aCM/AVC	Two-sided Wilcoxon test	0.25	25
1.01992e-12	1.10476	0.304	0.114	2.37347e-08	Negr1	aCM/AVC	Two-sided Wilcoxon test	0.25	25
1.22075e-22	1.1022	0.715	0.441	2.8408e-18	Tecrl	aCM/AVC	Two-sided Wilcoxon test	0.25	25
4.2248e-31	1.10187	0.975	0.856	9.83154e-27	Pakap	aCM/AVC	Two-sided Wilcoxon test	0.25	25
1.82641e-18	1.1009	0.696	0.473	4.25023e-14	Kalrn	aCM/AVC	Two-sided Wilcoxon test	0.25	25
8.22136e-28	1.09994	0.905	0.72	1.91319e-23	Cdk14	aCM/AVC	Two-sided Wilcoxon test	0.25	25
1.46585e-22	1.08837	0.576	0.265	3.41119e-18	Foxp2	aCM/AVC	Two-sided Wilcoxon test	0.25	25
3.71388e-35	1.07988	0.981	0.91	8.64257e-31	Ccdc141	aCM/AVC	Two-sided Wilcoxon test	0.25	25
3.72626e-15	1.07775	0.829	0.668	8.67139e-11	Ltbp1	aCM/AVC	Two-sided Wilcoxon test	0.25	25
4.53929e-26	1.06571	0.981	0.921	1.05634e-21	Palld	aCM/AVC	Two-sided Wilcoxon test	0.25	25
4.43361e-38	1.06343	1	0.949	1.03175e-33	Slc8a1	aCM/AVC	Two-sided Wilcoxon test	0.25	25
9.54175e-29	1.05845	0.937	0.752	2.22046e-24	Grip1	aCM/AVC	Two-sided Wilcoxon test	0.25	25
1.64958e-32	1.04792	0.994	0.874	3.83873e-28	Erbb4	aCM/AVC	Two-sided Wilcoxon test	0.25	25
8.36476e-23	1.04747	0.842	0.628	1.94656e-18	Gm26632	aCM/AVC	Two-sided Wilcoxon test	0.25	25
1.68943e-21	1.03547	0.854	0.691	3.93146e-17	Ptprd	aCM/AVC	Two-sided Wilcoxon test	0.25	25
2.6633e-20	1.03352	0.766	0.507	6.19776e-16	Itga6	aCM/AVC	Two-sided Wilcoxon test	0.25	25
1.2645e-26	1.0334	0.962	0.823	2.94262e-22	Celf2	aCM/AVC	Two-sided Wilcoxon test	0.25	25
1.84569e-24	1.0331	0.968	0.913	4.2951e-20	Myh6	aCM/AVC	Two-sided Wilcoxon test	0.25	25
9.48645e-15	1.03173	0.481	0.23	2.20759e-10	Dpp6	aCM/AVC	Two-sided Wilcoxon test	0.25	25
4.39508e-19	1.0218	0.544	0.276	1.02278e-14	Slc16a12	aCM/AVC	Two-sided Wilcoxon test	0.25	25
1.12257e-05	1.0082	0.519	0.418	0.261233	Sgcd	aCM/AVC	Two-sided Wilcoxon test	0.25	25
2.54961e-15	0.995536	0.753	0.593	5.9332e-11	Nos1ap	aCM/AVC	Two-sided Wilcoxon test	0.25	25
8.04544e-20	0.992701	0.835	0.661	1.87225e-15	Prickle1	aCM/AVC	Two-sided Wilcoxon test	0.25	25
7.15297e-14	0.987487	0.816	0.673	1.66457e-09	Rabgap1l	aCM/AVC	Two-sided Wilcoxon test	0.25	25
5.18765e-22	0.986843	0.816	0.641	1.20722e-17	Etv6	aCM/AVC	Two-sided Wilcoxon test	0.25	25
2.4082e-12	0.985941	0.475	0.261	5.60412e-08	Lama2	aCM/AVC	Two-sided Wilcoxon test	0.25	25
3.75119e-18	0.967052	0.772	0.559	8.7294e-14	Aff3	aCM/AVC	Two-sided Wilcoxon test	0.25	25
4.13789e-19	0.953429	0.873	0.742	9.62927e-15	Atxn1	aCM/AVC	Two-sided Wilcoxon test	0.25	25
4.25614e-16	0.946813	0.614	0.418	9.90447e-12	Khdrbs3	aCM/AVC	Two-sided Wilcoxon test	0.25	25
2.79166e-28	0.94379	0.968	0.903	6.49648e-24	Atp2a2	aCM/AVC	Two-sided Wilcoxon test	0.25	25
7.44561e-16	0.93963	0.848	0.722	1.73267e-11	Eml4	aCM/AVC	Two-sided Wilcoxon test	0.25	25
2.10884e-17	0.937407	0.81	0.637	4.90749e-13	Rora	aCM/AVC	Two-sided Wilcoxon test	0.25	25
1.64037e-21	0.930891	0.671	0.4	3.8173e-17	Tbx5	aCM/AVC	Two-sided Wilcoxon test	0.25	25
1.43196e-10	0.929706	0.291	0.119	3.33232e-06	Syt1	aCM/AVC	Two-sided Wilcoxon test	0.25	25
4.57944e-26	0.924682	0.804	0.479	1.06568e-21	Ano4	aCM/AVC	Two-sided Wilcoxon test	0.25	25
2.64369e-22	0.92185	0.734	0.476	6.15212e-18	Aopep	aCM/AVC	Two-sided Wilcoxon test	0.25	25
7.24156e-11	0.920765	0.449	0.254	1.68518e-06	Slc24a3	aCM/AVC	Two-sided Wilcoxon test	0.25	25
3.09643e-14	0.915318	0.696	0.496	7.20571e-10	Fchsd2	aCM/AVC	Two-sided Wilcoxon test	0.25	25
8.68909e-21	0.914233	0.734	0.494	2.02204e-16	Zswim6	aCM/AVC	Two-sided Wilcoxon test	0.25	25
7.32613e-17	0.910239	0.772	0.596	1.70486e-12	Sgms1	aCM/AVC	Two-sided Wilcoxon test	0.25	25
1.04209e-18	0.908915	0.658	0.418	2.42504e-14	Dgkh	aCM/AVC	Two-sided Wilcoxon test	0.25	25
3.14215e-14	0.903911	0.633	0.407	7.3121e-10	Slc24a2	aCM/AVC	Two-sided Wilcoxon test	0.25	25
1.97843e-17	0.897009	0.88	0.751	4.60402e-13	Ppp2r3a	aCM/AVC	Two-sided Wilcoxon test	0.25	25
5.87885e-19	0.896744	0.848	0.664	1.36807e-14	Msrb3	aCM/AVC	Two-sided Wilcoxon test	0.25	25
7.63689e-22	0.886452	0.354	0.102	1.77718e-17	Svep1	aCM/AVC	Two-sided Wilcoxon test	0.25	25
3.03444e-21	0.885968	1	1	7.06144e-17	Malat1	aCM/AVC	Two-sided Wilcoxon test	0.25	25
0.000116688	0.882832	0.449	0.356	1	Plxdc2	aCM/AVC	Two-sided Wilcoxon test	0.25	25
9.50012e-17	0.877104	0.842	0.676	2.21077e-12	Ptprk	aCM/AVC	Two-sided Wilcoxon test	0.25	25
4.92493e-27	0.876954	0.949	0.917	1.14608e-22	Pdlim5	aCM/AVC	Two-sided Wilcoxon test	0.25	25
5.82038e-19	0.866896	0.962	0.856	1.35446e-14	Cacnb2	aCM/AVC	Two-sided Wilcoxon test	0.25	25
1.22132e-17	0.862521	0.747	0.554	2.84213e-13	Zfp608	aCM/AVC	Two-sided Wilcoxon test	0.25	25
2.17101e-16	0.858765	0.797	0.707	5.05216e-12	Ctnnd1	aCM/AVC	Two-sided Wilcoxon test	0.25	25
6.50816e-10	0.854996	0.873	0.841	1.51451e-05	Enah	aCM/AVC	Two-sided Wilcoxon test	0.25	25
1.17605e-21	0.848497	0.816	0.525	2.73678e-17	Cacna2d2	aCM/AVC	Two-sided Wilcoxon test	0.25	25
6.2662e-19	0.844777	0.892	0.77	1.45821e-14	Camk2d	aCM/AVC	Two-sided Wilcoxon test	0.25	25
1.79679e-25	0.831339	0.987	0.866	4.18131e-21	Magi1	aCM/AVC	Two-sided Wilcoxon test	0.25	25
1.4012e-06	0.828594	0.348	0.215	0.0326073	Pcsk5	aCM/AVC	Two-sided Wilcoxon test	0.25	25
7.52216e-24	0.826467	0.93	0.749	1.75048e-19	Akap13	aCM/AVC	Two-sided Wilcoxon test	0.25	25
2.151e-25	0.825144	0.994	0.918	5.00559e-21	Airn	aCM/AVC	Two-sided Wilcoxon test	0.25	25
5.90372e-13	0.821999	0.652	0.465	1.37385e-08	4930512H18Rik	aCM/AVC	Two-sided Wilcoxon test	0.25	25
2.14026e-21	0.819614	0.924	0.753	4.9806e-17	Svil	aCM/AVC	Two-sided Wilcoxon test	0.25	25
3.59083e-11	0.815842	0.633	0.485	8.35623e-07	Myo1e	aCM/AVC	Two-sided Wilcoxon test	0.25	25
4.86658e-12	0.813172	0.608	0.441	1.1325e-07	Ednra	aCM/AVC	Two-sided Wilcoxon test	0.25	25
1.11127e-13	0.812956	0.703	0.527	2.58604e-09	Ablim1	aCM/AVC	Two-sided Wilcoxon test	0.25	25
1.28902e-12	0.800285	0.5	0.285	2.99967e-08	Gm36975	aCM/AVC	Two-sided Wilcoxon test	0.25	25
8.08412e-11	0.796386	0.563	0.382	1.88126e-06	Timp3	aCM/AVC	Two-sided Wilcoxon test	0.25	25
1.79909e-31	0.794849	0.373	0.076	4.18666e-27	B130024G19Rik	aCM/AVC	Two-sided Wilcoxon test	0.25	25
6.84216e-18	0.781666	0.886	0.812	1.59224e-13	Zfp644	aCM/AVC	Two-sided Wilcoxon test	0.25	25
1.29655e-16	0.778004	0.861	0.73	3.0172e-12	Picalm	aCM/AVC	Two-sided Wilcoxon test	0.25	25
7.11934e-14	0.772725	0.835	0.751	1.65674e-09	Ppp3ca	aCM/AVC	Two-sided Wilcoxon test	0.25	25
7.16311e-21	0.769469	0.956	0.795	1.66693e-16	Rbm20	aCM/AVC	Two-sided Wilcoxon test	0.25	25
3.00386e-15	0.764452	0.759	0.553	6.99027e-11	Col4a5	aCM/AVC	Two-sided Wilcoxon test	0.25	25
1.01842e-10	0.762604	0.734	0.59	2.36995e-06	Sorbs1	aCM/AVC	Two-sided Wilcoxon test	0.25	25
6.52483e-13	0.760055	0.778	0.625	1.51839e-08	Maml2	aCM/AVC	Two-sided Wilcoxon test	0.25	25
7.7065e-17	0.757806	0.791	0.582	1.79338e-12	5330438D12Rik	aCM/AVC	Two-sided Wilcoxon test	0.25	25
1.10914e-10	0.755813	0.563	0.399	2.58107e-06	Arhgap26	aCM/AVC	Two-sided Wilcoxon test	0.25	25
1.7018e-15	0.753759	0.842	0.721	3.96026e-11	Sbf2	aCM/AVC	Two-sided Wilcoxon test	0.25	25
1.7406e-09	0.752617	0.747	0.632	4.05056e-05	Iqsec1	aCM/AVC	Two-sided Wilcoxon test	0.25	25
4.843e-08	0.74436	0.658	0.598	0.00112701	Mob1b	aCM/AVC	Two-sided Wilcoxon test	0.25	25
2.2502e-17	0.738286	0.854	0.754	5.23644e-13	Foxp1	aCM/AVC	Two-sided Wilcoxon test	0.25	25
1.73548e-15	0.736091	0.867	0.708	4.03863e-11	Prkce	aCM/AVC	Two-sided Wilcoxon test	0.25	25
5.81846e-13	0.733841	0.639	0.449	1.35401e-08	Cask	aCM/AVC	Two-sided Wilcoxon test	0.25	25
2.38475e-18	0.733237	0.968	0.831	5.54956e-14	Ctnna3	aCM/AVC	Two-sided Wilcoxon test	0.25	25
1.08569e-10	0.727473	0.5	0.335	2.52651e-06	Hivep1	aCM/AVC	Two-sided Wilcoxon test	0.25	25
5.37887e-12	0.724644	0.791	0.692	1.25172e-07	Spag9	aCM/AVC	Two-sided Wilcoxon test	0.25	25
1.39928e-12	0.715474	0.722	0.566	3.25626e-08	Aff2	aCM/AVC	Two-sided Wilcoxon test	0.25	25
1.24535e-13	0.712671	0.734	0.55	2.89805e-09	Sik3	aCM/AVC	Two-sided Wilcoxon test	0.25	25
4.86915e-12	0.708318	0.785	0.668	1.1331e-07	Zeb1	aCM/AVC	Two-sided Wilcoxon test	0.25	25
8.68449e-13	0.70789	0.703	0.563	2.02097e-08	E130308A19Rik	aCM/AVC	Two-sided Wilcoxon test	0.25	25
1.11924e-08	0.707204	0.57	0.432	0.000260458	Ppargc1a	aCM/AVC	Two-sided Wilcoxon test	0.25	25
8.61782e-12	0.702355	0.861	0.789	2.00545e-07	Arih1	aCM/AVC	Two-sided Wilcoxon test	0.25	25
2.37627e-07	0.700522	0.671	0.566	0.00552983	Plxna4	aCM/AVC	Two-sided Wilcoxon test	0.25	25
1.00131e-08	0.699175	0.722	0.648	0.000233015	Dlc1	aCM/AVC	Two-sided Wilcoxon test	0.25	25
2.14877e-09	0.698114	0.614	0.459	5.00041e-05	Malt1	aCM/AVC	Two-sided Wilcoxon test	0.25	25
2.2146e-24	0.69793	0.994	0.967	5.1536e-20	Rbpms	aCM/AVC	Two-sided Wilcoxon test	0.25	25
1.71888e-13	0.693949	0.93	0.851	4.00001e-09	Afdn	aCM/AVC	Two-sided Wilcoxon test	0.25	25
6.54982e-09	0.690151	0.367	0.192	0.000152421	Tmem132c	aCM/AVC	Two-sided Wilcoxon test	0.25	25
1.69734e-10	0.689706	0.696	0.531	3.94988e-06	Hdac9	aCM/AVC	Two-sided Wilcoxon test	0.25	25
1.99265e-13	0.688038	0.753	0.637	4.63709e-09	Fam172a	aCM/AVC	Two-sided Wilcoxon test	0.25	25
6.00343e-17	0.686764	0.766	0.582	1.39706e-12	Pcnx	aCM/AVC	Two-sided Wilcoxon test	0.25	25
2.9231e-16	0.685978	0.956	0.879	6.80236e-12	Ppp1r12a	aCM/AVC	Two-sided Wilcoxon test	0.25	25
1.10125e-06	0.680739	0.557	0.419	0.0256273	Sema6d	aCM/AVC	Two-sided Wilcoxon test	0.25	25
1.59793e-08	0.678431	0.589	0.428	0.000371855	Lrmda	aCM/AVC	Two-sided Wilcoxon test	0.25	25
1.81015e-09	0.67576	0.684	0.571	4.21239e-05	Atf6	aCM/AVC	Two-sided Wilcoxon test	0.25	25
3.75548e-14	0.674544	0.861	0.738	8.73939e-10	Zbtb20	aCM/AVC	Two-sided Wilcoxon test	0.25	25
1.60907e-18	0.674034	0.937	0.81	3.74447e-14	Myom1	aCM/AVC	Two-sided Wilcoxon test	0.25	25
1.65922e-16	0.6735	0.905	0.79	3.86118e-12	Bmpr1a	aCM/AVC	Two-sided Wilcoxon test	0.25	25
9.77076e-14	0.673437	0.835	0.73	2.27375e-09	Rev3l	aCM/AVC	Two-sided Wilcoxon test	0.25	25
6.60012e-11	0.672675	0.449	0.257	1.53591e-06	Frem2	aCM/AVC	Two-sided Wilcoxon test	0.25	25
5.22593e-11	0.671972	0.652	0.473	1.21613e-06	Epha7	aCM/AVC	Two-sided Wilcoxon test	0.25	25
7.08848e-10	0.671138	0.563	0.418	1.64956e-05	Slc7a1	aCM/AVC	Two-sided Wilcoxon test	0.25	25
3.05394e-08	0.668141	0.785	0.722	0.000710682	Mllt3	aCM/AVC	Two-sided Wilcoxon test	0.25	25
8.69001e-05	0.667925	0.475	0.392	1	Col4a6	aCM/AVC	Two-sided Wilcoxon test	0.25	25
6.23697e-15	0.667239	0.873	0.766	1.4514e-10	Baz2b	aCM/AVC	Two-sided Wilcoxon test	0.25	25
2.80368e-10	0.666426	0.797	0.71	6.52445e-06	Dyrk1a	aCM/AVC	Two-sided Wilcoxon test	0.25	25
1.85401e-09	0.665738	0.601	0.447	4.31448e-05	Bcas3	aCM/AVC	Two-sided Wilcoxon test	0.25	25
2.0949e-06	0.665498	0.557	0.491	0.0487505	Myh9	aCM/AVC	Two-sided Wilcoxon test	0.25	25
4.18344e-11	0.656738	0.829	0.77	9.73528e-07	Arhgap31	aCM/AVC	Two-sided Wilcoxon test	0.25	25
1.22008e-12	0.652131	0.766	0.643	2.83926e-08	Neo1	aCM/AVC	Two-sided Wilcoxon test	0.25	25
7.55128e-09	0.650051	0.601	0.482	0.000175726	Pde7a	aCM/AVC	Two-sided Wilcoxon test	0.25	25
3.46444e-19	0.649771	0.987	0.866	8.06209e-15	Ank3	aCM/AVC	Two-sided Wilcoxon test	0.25	25
1.89977e-07	0.648682	0.601	0.508	0.00442096	Klf7	aCM/AVC	Two-sided Wilcoxon test	0.25	25
9.57187e-08	0.647239	0.854	0.793	0.00222747	Samd4	aCM/AVC	Two-sided Wilcoxon test	0.25	25
1.21908e-07	0.635201	0.5	0.335	0.00283693	Enox1	aCM/AVC	Two-sided Wilcoxon test	0.25	25
9.73719e-06	0.632226	0.677	0.636	0.226594	Ifrd1	aCM/AVC	Two-sided Wilcoxon test	0.25	25
2.31955e-14	0.63132	0.797	0.624	5.39782e-10	Mbd5	aCM/AVC	Two-sided Wilcoxon test	0.25	25
4.62196e-12	0.631022	0.93	0.825	1.07558e-07	Pcdh7	aCM/AVC	Two-sided Wilcoxon test	0.25	25
5.50443e-12	0.630617	0.759	0.646	1.28094e-07	Brwd1	aCM/AVC	Two-sided Wilcoxon test	0.25	25
1.48773e-06	0.6299	0.437	0.307	0.0346209	Dock4	aCM/AVC	Two-sided Wilcoxon test	0.25	25
1.30911e-06	0.625389	0.671	0.614	0.0304642	Pawr	aCM/AVC	Two-sided Wilcoxon test	0.25	25
6.83312e-08	0.622419	0.703	0.607	0.00159014	Ube2e2	aCM/AVC	Two-sided Wilcoxon test	0.25	25
3.57759e-09	0.620417	0.677	0.582	8.3254e-05	St7	aCM/AVC	Two-sided Wilcoxon test	0.25	25
2.6686e-15	0.619936	0.804	0.68	6.21011e-11	Cnot2	aCM/AVC	Two-sided Wilcoxon test	0.25	25
2.0348e-10	0.618689	0.589	0.43	4.73519e-06	Mpp7	aCM/AVC	Two-sided Wilcoxon test	0.25	25
3.57531e-07	0.618683	0.405	0.26	0.0083201	Jazf1	aCM/AVC	Two-sided Wilcoxon test	0.25	25
1.25585e-11	0.612964	0.424	0.218	2.92249e-07	Atp8a2	aCM/AVC	Two-sided Wilcoxon test	0.25	25
1.68567e-11	0.612103	0.291	0.112	3.92272e-07	Esr1	aCM/AVC	Two-sided Wilcoxon test	0.25	25
2.71718e-09	0.609897	0.696	0.572	6.32314e-05	Myocd	aCM/AVC	Two-sided Wilcoxon test	0.25	25
8.42297e-09	0.6078	0.829	0.743	0.000196011	Ext1	aCM/AVC	Two-sided Wilcoxon test	0.25	25
3.19538e-10	0.604486	0.601	0.459	7.43597e-06	Epb41l2	aCM/AVC	Two-sided Wilcoxon test	0.25	25
3.70504e-05	0.602842	0.582	0.545	0.8622	Herc4	aCM/AVC	Two-sided Wilcoxon test	0.25	25
2.37161e-13	0.601109	0.949	0.83	5.51898e-09	Pakap.1	aCM/AVC	Two-sided Wilcoxon test	0.25	25
7.37565e-09	0.600017	0.658	0.545	0.000171639	Creb3l2	aCM/AVC	Two-sided Wilcoxon test	0.25	25
2.6171e-10	0.599941	0.747	0.674	6.09026e-06	Runx1t1	aCM/AVC	Two-sided Wilcoxon test	0.25	25
2.50448e-06	0.599737	0.43	0.28	0.0582817	Ryr3	aCM/AVC	Two-sided Wilcoxon test	0.25	25
1.99385e-07	0.59629	0.361	0.216	0.00463988	Arhgap28	aCM/AVC	Two-sided Wilcoxon test	0.25	25
1.83548e-10	0.595827	0.494	0.298	4.27135e-06	Parp8	aCM/AVC	Two-sided Wilcoxon test	0.25	25
2.78046e-07	0.594433	0.43	0.291	0.00647042	Gnao1	aCM/AVC	Two-sided Wilcoxon test	0.25	25
0.000132515	0.593824	0.424	0.348	1	Elmsan1	aCM/AVC	Two-sided Wilcoxon test	0.25	25
1.91417e-09	0.593633	0.709	0.625	4.45446e-05	Nup98	aCM/AVC	Two-sided Wilcoxon test	0.25	25
8.58822e-07	0.592692	0.361	0.219	0.0199857	Pdgfc	aCM/AVC	Two-sided Wilcoxon test	0.25	25
6.44407e-08	0.59219	0.418	0.261	0.0014996	Tnik	aCM/AVC	Two-sided Wilcoxon test	0.25	25
3.21229e-07	0.591152	0.614	0.488	0.00747531	Etl4	aCM/AVC	Two-sided Wilcoxon test	0.25	25
1.95603e-11	0.589619	0.867	0.699	4.55188e-07	Kif26b	aCM/AVC	Two-sided Wilcoxon test	0.25	25
4.02492e-10	0.589432	0.722	0.546	9.36639e-06	Lrrtm3	aCM/AVC	Two-sided Wilcoxon test	0.25	25
6.06174e-13	0.586631	0.937	0.857	1.41063e-08	Lpp	aCM/AVC	Two-sided Wilcoxon test	0.25	25
2.82554e-11	0.583334	0.785	0.67	6.57531e-07	Rapgef6	aCM/AVC	Two-sided Wilcoxon test	0.25	25
4.38606e-07	0.58298	0.646	0.569	0.0102068	Prkd1	aCM/AVC	Two-sided Wilcoxon test	0.25	25
1.266e-10	0.582677	0.69	0.537	2.94611e-06	Usp32	aCM/AVC	Two-sided Wilcoxon test	0.25	25
3.10014e-08	0.580376	0.652	0.54	0.000721433	Ptpn4	aCM/AVC	Two-sided Wilcoxon test	0.25	25
5.83804e-10	0.579103	0.462	0.28	1.35857e-05	Adam19	aCM/AVC	Two-sided Wilcoxon test	0.25	25
1.70643e-11	0.578812	0.778	0.652	3.97104e-07	Rlf	aCM/AVC	Two-sided Wilcoxon test	0.25	25
1.17736e-10	0.578586	0.785	0.691	2.73983e-06	Ascc3	aCM/AVC	Two-sided Wilcoxon test	0.25	25
1.07144e-06	0.578339	0.519	0.41	0.0249334	Dis3l2	aCM/AVC	Two-sided Wilcoxon test	0.25	25
2.83034e-06	0.57544	0.627	0.57	0.065865	Epc1	aCM/AVC	Two-sided Wilcoxon test	0.25	25
1.03848e-08	0.572943	0.671	0.546	0.000241664	Tiparp	aCM/AVC	Two-sided Wilcoxon test	0.25	25
2.00923e-13	0.569816	0.924	0.776	4.67568e-09	Tanc2	aCM/AVC	Two-sided Wilcoxon test	0.25	25
2.51597e-09	0.569407	0.639	0.478	5.85491e-05	Ankrd12	aCM/AVC	Two-sided Wilcoxon test	0.25	25
1.91475e-08	0.569234	0.709	0.608	0.000445583	Btbd9	aCM/AVC	Two-sided Wilcoxon test	0.25	25
0.000219215	0.560386	0.487	0.413	1	Macrod2	aCM/AVC	Two-sided Wilcoxon test	0.25	25
7.14501e-05	0.558775	0.335	0.232	1	Etv1	aCM/AVC	Two-sided Wilcoxon test	0.25	25
2.08215e-08	0.558563	0.348	0.188	0.000484536	Cobl	aCM/AVC	Two-sided Wilcoxon test	0.25	25
9.01345e-08	0.558282	0.563	0.437	0.00209752	Sec24a	aCM/AVC	Two-sided Wilcoxon test	0.25	25
6.42196e-10	0.556816	0.709	0.571	1.49446e-05	Myo18b	aCM/AVC	Two-sided Wilcoxon test	0.25	25
7.21835e-08	0.555156	0.829	0.775	0.00167978	Mbnl2	aCM/AVC	Two-sided Wilcoxon test	0.25	25
5.49616e-09	0.553425	0.671	0.544	0.000127901	Apbb2	aCM/AVC	Two-sided Wilcoxon test	0.25	25
2.86868e-15	0.552986	0.266	0.075	6.6757e-11	A230057D06Rik	aCM/AVC	Two-sided Wilcoxon test	0.25	25
2.41503e-07	0.551764	0.456	0.308	0.00562001	Sdk2	aCM/AVC	Two-sided Wilcoxon test	0.25	25
7.75515e-05	0.55092	0.532	0.465	1	Hivep2	aCM/AVC	Two-sided Wilcoxon test	0.25	25
2.47162e-09	0.547411	0.405	0.22	5.75171e-05	Corin	aCM/AVC	Two-sided Wilcoxon test	0.25	25
2.28471e-08	0.545487	0.69	0.578	0.000531676	Ppp1r9a	aCM/AVC	Two-sided Wilcoxon test	0.25	25
1.70044e-05	0.545265	0.627	0.54	0.395709	Rfx3	aCM/AVC	Two-sided Wilcoxon test	0.25	25
3.18583e-09	0.544339	0.829	0.755	7.41374e-05	Pde4d	aCM/AVC	Two-sided Wilcoxon test	0.25	25
4.49096e-11	0.538942	0.829	0.742	1.04509e-06	Utrn	aCM/AVC	Two-sided Wilcoxon test	0.25	25
8.80949e-09	0.538788	0.785	0.716	0.000205006	Clasp1	aCM/AVC	Two-sided Wilcoxon test	0.25	25
3.43184e-09	0.537692	0.791	0.684	7.98623e-05	Nbea	aCM/AVC	Two-sided Wilcoxon test	0.25	25
6.88154e-07	0.536901	0.614	0.524	0.016014	Exoc6b	aCM/AVC	Two-sided Wilcoxon test	0.25	25
5.40523e-10	0.536213	0.829	0.796	1.25785e-05	Nktr	aCM/AVC	Two-sided Wilcoxon test	0.25	25
2.63216e-10	0.534647	0.873	0.838	6.12529e-06	Strn3	aCM/AVC	Two-sided Wilcoxon test	0.25	25
7.85642e-10	0.534059	0.816	0.767	1.82827e-05	Zfand3	aCM/AVC	Two-sided Wilcoxon test	0.25	25
2.83236e-06	0.532563	0.741	0.679	0.0659117	Tmem108	aCM/AVC	Two-sided Wilcoxon test	0.25	25
9.1844e-10	0.530669	0.557	0.359	2.1373e-05	Gm47271	aCM/AVC	Two-sided Wilcoxon test	0.25	25
6.38254e-11	0.526548	0.778	0.623	1.48528e-06	Arl15	aCM/AVC	Two-sided Wilcoxon test	0.25	25
7.7996e-10	0.525901	0.848	0.723	1.81505e-05	Gata4	aCM/AVC	Two-sided Wilcoxon test	0.25	25
8.51082e-07	0.525416	0.462	0.335	0.0198055	Elovl5	aCM/AVC	Two-sided Wilcoxon test	0.25	25
6.53994e-08	0.524865	0.703	0.586	0.00152191	Zfp521	aCM/AVC	Two-sided Wilcoxon test	0.25	25
5.55122e-09	0.524397	0.797	0.682	0.000129182	Mical2	aCM/AVC	Two-sided Wilcoxon test	0.25	25
0.000259559	0.523807	0.816	0.785	1	Ankrd1	aCM/AVC	Two-sided Wilcoxon test	0.25	25
0.000662767	0.521596	0.291	0.2	1	Gucy1a2	aCM/AVC	Two-sided Wilcoxon test	0.25	25
6.67222e-08	0.52077	0.348	0.19	0.00155269	Naaladl2	aCM/AVC	Two-sided Wilcoxon test	0.25	25
1.19803e-09	0.519273	0.386	0.21	2.78794e-05	Lama5	aCM/AVC	Two-sided Wilcoxon test	0.25	25
1.03304e-07	0.518338	0.741	0.682	0.00240398	Map4k4	aCM/AVC	Two-sided Wilcoxon test	0.25	25
1.81767e-08	0.517902	0.823	0.766	0.000422991	Cap2	aCM/AVC	Two-sided Wilcoxon test	0.25	25
1.54286e-08	0.517737	0.753	0.676	0.000359039	Mical3	aCM/AVC	Two-sided Wilcoxon test	0.25	25
2.14046e-05	0.517709	0.551	0.461	0.498107	Nr6a1	aCM/AVC	Two-sided Wilcoxon test	0.25	25
1.1693e-05	0.517389	0.652	0.542	0.272107	Gpc6	aCM/AVC	Two-sided Wilcoxon test	0.25	25
2.284e-05	0.516765	0.633	0.581	0.531509	Nfat5	aCM/AVC	Two-sided Wilcoxon test	0.25	25
9.19844e-14	0.516282	0.981	0.844	2.14057e-09	Cacna1c	aCM/AVC	Two-sided Wilcoxon test	0.25	25
2.08576e-07	0.515521	0.601	0.452	0.00485376	Lrrc4	aCM/AVC	Two-sided Wilcoxon test	0.25	25
2.09841e-07	0.512777	0.684	0.608	0.00488321	Lamp2	aCM/AVC	Two-sided Wilcoxon test	0.25	25
0.000673582	0.512581	0.443	0.371	1	B3galt1	aCM/AVC	Two-sided Wilcoxon test	0.25	25
3.85885e-07	0.509769	0.595	0.495	0.00897994	Lgr4	aCM/AVC	Two-sided Wilcoxon test	0.25	25
2.6817e-11	0.509279	0.956	0.871	6.24058e-07	Msi2	aCM/AVC	Two-sided Wilcoxon test	0.25	25
9.16136e-07	0.507908	0.399	0.258	0.0213194	Mrtfa	aCM/AVC	Two-sided Wilcoxon test	0.25	25
1.32838e-05	0.507007	0.595	0.52	0.309127	Adgrl2	aCM/AVC	Two-sided Wilcoxon test	0.25	25
2.14383e-06	0.505744	0.797	0.789	0.049889	Tbl1x	aCM/AVC	Two-sided Wilcoxon test	0.25	25
1.91009e-06	0.505008	0.684	0.625	0.0444496	Ldb3	aCM/AVC	Two-sided Wilcoxon test	0.25	25
5.70311e-07	0.504604	0.753	0.691	0.0132717	Igf2bp2	aCM/AVC	Two-sided Wilcoxon test	0.25	25
6.77295e-07	0.503945	0.646	0.574	0.0157613	Usp28	aCM/AVC	Two-sided Wilcoxon test	0.25	25
5.37325e-05	0.503882	0.392	0.302	1	Lmbrd1	aCM/AVC	Two-sided Wilcoxon test	0.25	25
7.01741e-15	0.502692	0.994	0.996	1.63302e-10	AY036118	aCM/AVC	Two-sided Wilcoxon test	0.25	25
1.50078e-05	0.502434	0.608	0.568	0.349246	Rassf8	aCM/AVC	Two-sided Wilcoxon test	0.25	25
0.00299065	0.499335	0.519	0.5	1	Zfp654	aCM/AVC	Two-sided Wilcoxon test	0.25	25
4.07096e-06	0.498884	0.367	0.233	0.0947354	Gm20275	aCM/AVC	Two-sided Wilcoxon test	0.25	25
6.05779e-05	0.498878	0.443	0.342	1	Nrip1	aCM/AVC	Two-sided Wilcoxon test	0.25	25
1.13432e-06	0.497364	0.335	0.197	0.0263968	Plxna2	aCM/AVC	Two-sided Wilcoxon test	0.25	25
7.16377e-05	0.495436	0.506	0.42	1	Usp29	aCM/AVC	Two-sided Wilcoxon test	0.25	25
6.45424e-06	0.495345	0.551	0.455	0.150197	Agap1	aCM/AVC	Two-sided Wilcoxon test	0.25	25
0.00138972	0.494407	0.519	0.48	1	Ank2	aCM/AVC	Two-sided Wilcoxon test	0.25	25
7.48923e-06	0.494053	0.608	0.533	0.174282	Schip1	aCM/AVC	Two-sided Wilcoxon test	0.25	25
1.0056e-07	0.493559	0.709	0.61	0.00234014	Cog5	aCM/AVC	Two-sided Wilcoxon test	0.25	25
0.000139905	0.493484	0.487	0.418	1	Setd7	aCM/AVC	Two-sided Wilcoxon test	0.25	25
6.72643e-08	0.493185	0.677	0.602	0.00156531	Fgfr2	aCM/AVC	Two-sided Wilcoxon test	0.25	25
3.53252e-12	0.488901	0.962	0.898	8.22053e-08	Igf2r	aCM/AVC	Two-sided Wilcoxon test	0.25	25
1.30891e-08	0.485731	0.753	0.659	0.000304597	Braf	aCM/AVC	Two-sided Wilcoxon test	0.25	25
0.000219231	0.484597	0.31	0.215	1	Itgb1bp2	aCM/AVC	Two-sided Wilcoxon test	0.25	25
3.7514e-07	0.483563	0.266	0.129	0.00872989	Pde1c	aCM/AVC	Two-sided Wilcoxon test	0.25	25
4.9315e-10	0.482939	0.854	0.784	1.14761e-05	Pard3	aCM/AVC	Two-sided Wilcoxon test	0.25	25
2.84911e-05	0.482893	0.532	0.468	0.663016	Htt	aCM/AVC	Two-sided Wilcoxon test	0.25	25
2.10658e-06	0.482802	0.715	0.635	0.0490222	Tcf4	aCM/AVC	Two-sided Wilcoxon test	0.25	25
3.59295e-07	0.482709	0.557	0.442	0.00836116	Gm37240	aCM/AVC	Two-sided Wilcoxon test	0.25	25
4.12702e-10	0.481845	0.829	0.769	9.60399e-06	Kansl1	aCM/AVC	Two-sided Wilcoxon test	0.25	25
1.47017e-07	0.480989	0.506	0.382	0.00342123	Cdc14b	aCM/AVC	Two-sided Wilcoxon test	0.25	25
1.98032e-05	0.480456	0.266	0.153	0.460841	Hdx	aCM/AVC	Two-sided Wilcoxon test	0.25	25
2.36741e-06	0.480277	0.69	0.602	0.055092	Syne2	aCM/AVC	Two-sided Wilcoxon test	0.25	25
2.8059e-05	0.480206	0.728	0.722	0.652961	Slc38a2	aCM/AVC	Two-sided Wilcoxon test	0.25	25
0.00225855	0.480067	0.513	0.436	1	Rbms3	aCM/AVC	Two-sided Wilcoxon test	0.25	25
4.60734e-08	0.479769	0.823	0.752	0.00107217	Mef2a	aCM/AVC	Two-sided Wilcoxon test	0.25	25
1.92097e-05	0.478968	0.595	0.535	0.447028	Pygb	aCM/AVC	Two-sided Wilcoxon test	0.25	25
7.25426e-06	0.478148	0.443	0.326	0.168814	Mettl25	aCM/AVC	Two-sided Wilcoxon test	0.25	25
0.00124049	0.476814	0.62	0.616	1	Pde4dip	aCM/AVC	Two-sided Wilcoxon test	0.25	25
0.00192723	0.47614	0.544	0.52	1	Crybg3	aCM/AVC	Two-sided Wilcoxon test	0.25	25
7.32118e-07	0.472901	0.652	0.576	0.0170371	Stk3	aCM/AVC	Two-sided Wilcoxon test	0.25	25
1.63396e-09	0.472013	0.88	0.759	3.8024e-05	Ankrd17	aCM/AVC	Two-sided Wilcoxon test	0.25	25
6.12781e-08	0.471181	0.81	0.714	0.001426	Fndc3b	aCM/AVC	Two-sided Wilcoxon test	0.25	25
0.000517051	0.470216	0.278	0.187	1	Tiam2	aCM/AVC	Two-sided Wilcoxon test	0.25	25
4.04574e-08	0.470054	0.867	0.753	0.000941485	Fhod3	aCM/AVC	Two-sided Wilcoxon test	0.25	25
4.60141e-05	0.46982	0.487	0.388	1	Mgat5	aCM/AVC	Two-sided Wilcoxon test	0.25	25
1.18854e-06	0.468229	0.747	0.716	0.0276586	Rsrc1	aCM/AVC	Two-sided Wilcoxon test	0.25	25
3.78699e-08	0.467736	0.709	0.581	0.000881271	Arid1b	aCM/AVC	Two-sided Wilcoxon test	0.25	25
6.72251e-06	0.467197	0.665	0.59	0.15644	Lcorl	aCM/AVC	Two-sided Wilcoxon test	0.25	25
1.10197e-05	0.465994	0.69	0.645	0.256439	Clk1	aCM/AVC	Two-sided Wilcoxon test	0.25	25
2.35272e-05	0.465793	0.506	0.42	0.547502	Ptprs	aCM/AVC	Two-sided Wilcoxon test	0.25	25
0.00170045	0.465728	0.519	0.5	1	Osbpl9	aCM/AVC	Two-sided Wilcoxon test	0.25	25
4.29309e-06	0.465698	0.665	0.647	0.0999046	Ppp2r5a	aCM/AVC	Two-sided Wilcoxon test	0.25	25
2.93207e-07	0.46511	0.772	0.675	0.00682322	Dlg1	aCM/AVC	Two-sided Wilcoxon test	0.25	25
1.13232e-09	0.465038	0.778	0.672	2.63501e-05	Nf1	aCM/AVC	Two-sided Wilcoxon test	0.25	25
7.97529e-06	0.462914	0.538	0.426	0.185593	Fam49a	aCM/AVC	Two-sided Wilcoxon test	0.25	25
0.000962115	0.462255	0.538	0.509	1	Nedd4l	aCM/AVC	Two-sided Wilcoxon test	0.25	25
8.98507e-08	0.461339	0.69	0.535	0.00209091	Wwox	aCM/AVC	Two-sided Wilcoxon test	0.25	25
0.00176971	0.460247	0.424	0.358	1	Cry1	aCM/AVC	Two-sided Wilcoxon test	0.25	25
4.36241e-05	0.459411	0.494	0.387	1	Gm16599	aCM/AVC	Two-sided Wilcoxon test	0.25	25
0.000820622	0.458462	0.373	0.304	1	Sik2	aCM/AVC	Two-sided Wilcoxon test	0.25	25
0.000403051	0.458201	0.513	0.473	1	Cblb	aCM/AVC	Two-sided Wilcoxon test	0.25	25
6.46507e-07	0.457264	0.475	0.342	0.0150449	Fam91a1	aCM/AVC	Two-sided Wilcoxon test	0.25	25
5.24962e-07	0.457142	0.715	0.62	0.0122164	Sipa1l1	aCM/AVC	Two-sided Wilcoxon test	0.25	25
0.00012648	0.455985	0.601	0.565	1	Smad2	aCM/AVC	Two-sided Wilcoxon test	0.25	25
0.000150884	0.455945	0.487	0.425	1	Mdn1	aCM/AVC	Two-sided Wilcoxon test	0.25	25
1.43091e-06	0.455523	0.627	0.529	0.0332987	Tbl1xr1	aCM/AVC	Two-sided Wilcoxon test	0.25	25
1.3879e-05	0.455395	0.627	0.608	0.322978	Pitpna	aCM/AVC	Two-sided Wilcoxon test	0.25	25
1.68731e-06	0.454337	0.627	0.566	0.0392655	Fars2	aCM/AVC	Two-sided Wilcoxon test	0.25	25
3.0216e-06	0.453539	0.392	0.266	0.0703156	Wdfy2	aCM/AVC	Two-sided Wilcoxon test	0.25	25
1.27912e-06	0.453241	0.563	0.41	0.0297664	Gm10848	aCM/AVC	Two-sided Wilcoxon test	0.25	25
3.58054e-08	0.452134	0.753	0.67	0.000833228	Kif13a	aCM/AVC	Two-sided Wilcoxon test	0.25	25
0.000707346	0.452134	0.582	0.53	1	Pdzrn3	aCM/AVC	Two-sided Wilcoxon test	0.25	25
1.37203e-05	0.451815	0.595	0.506	0.319284	Ehbp1	aCM/AVC	Two-sided Wilcoxon test	0.25	25
0.000925438	0.451425	0.5	0.467	1	Tmem135	aCM/AVC	Two-sided Wilcoxon test	0.25	25
1.64069e-05	0.450818	0.57	0.512	0.381804	Myo9a	aCM/AVC	Two-sided Wilcoxon test	0.25	25
0.000164664	0.448598	0.513	0.457	1	Filip1l	aCM/AVC	Two-sided Wilcoxon test	0.25	25
4.22517e-05	0.447904	0.456	0.34	0.983238	Cpne5	aCM/AVC	Two-sided Wilcoxon test	0.25	25
1.00374e-10	0.447847	0.968	0.91	2.33581e-06	Qk	aCM/AVC	Two-sided Wilcoxon test	0.25	25
1.30005e-06	0.446337	0.544	0.433	0.0302535	Kdm3a	aCM/AVC	Two-sided Wilcoxon test	0.25	25
1.74792e-05	0.446285	0.652	0.586	0.406757	Tspan9	aCM/AVC	Two-sided Wilcoxon test	0.25	25
3.1891e-06	0.44612	0.753	0.698	0.0742134	Pfkp	aCM/AVC	Two-sided Wilcoxon test	0.25	25
0.00952877	0.445504	0.576	0.574	1	Flnc	aCM/AVC	Two-sided Wilcoxon test	0.25	25
6.57223e-06	0.44543	0.722	0.682	0.152942	Jarid2	aCM/AVC	Two-sided Wilcoxon test	0.25	25
1.04073e-11	0.445266	0.905	0.786	2.42188e-07	Chd2	aCM/AVC	Two-sided Wilcoxon test	0.25	25
1.85068e-12	0.443411	0.867	0.658	4.30672e-08	Atrnl1	aCM/AVC	Two-sided Wilcoxon test	0.25	25
1.74076e-06	0.442633	0.652	0.594	0.0405093	Actn4	aCM/AVC	Two-sided Wilcoxon test	0.25	25
1.50829e-07	0.442324	0.272	0.133	0.00350995	Tbc1d9	aCM/AVC	Two-sided Wilcoxon test	0.25	25
5.202e-05	0.442145	0.589	0.536	1	Ssh2	aCM/AVC	Two-sided Wilcoxon test	0.25	25
2.4076e-06	0.44182	0.665	0.589	0.0560272	Zcchc7	aCM/AVC	Two-sided Wilcoxon test	0.25	25
2.65601e-08	0.441108	0.266	0.12	0.000618079	Arhgap24	aCM/AVC	Two-sided Wilcoxon test	0.25	25
4.44895e-07	0.441091	0.658	0.54	0.0103532	Ralgapa2	aCM/AVC	Two-sided Wilcoxon test	0.25	25
0.000228357	0.440856	0.57	0.551	1	Fnbp1l	aCM/AVC	Two-sided Wilcoxon test	0.25	25
0.000313029	0.440293	0.671	0.622	1	Casz1	aCM/AVC	Two-sided Wilcoxon test	0.25	25
0.000188386	0.439979	0.513	0.435	1	Smyd3	aCM/AVC	Two-sided Wilcoxon test	0.25	25
9.97516e-05	0.43836	0.627	0.601	1	Zfp280d	aCM/AVC	Two-sided Wilcoxon test	0.25	25
0.00227753	0.437487	0.405	0.335	1	Tbc1d4	aCM/AVC	Two-sided Wilcoxon test	0.25	25
7.53136e-09	0.436282	0.899	0.862	0.000175262	Adk	aCM/AVC	Two-sided Wilcoxon test	0.25	25
4.40618e-06	0.434671	0.728	0.686	0.102536	Aff4	aCM/AVC	Two-sided Wilcoxon test	0.25	25
3.00564e-07	0.434602	0.544	0.389	0.00699442	Gm13269	aCM/AVC	Two-sided Wilcoxon test	0.25	25
0.00626284	0.43315	0.601	0.59	1	Ehd4	aCM/AVC	Two-sided Wilcoxon test	0.25	25
0.000662759	0.433024	0.589	0.549	1	Zfp704	aCM/AVC	Two-sided Wilcoxon test	0.25	25
0.000152797	0.432224	0.734	0.723	1	Bbx	aCM/AVC	Two-sided Wilcoxon test	0.25	25
2.42331e-07	0.428913	0.911	0.819	0.00563929	Auts2	aCM/AVC	Two-sided Wilcoxon test	0.25	25
2.09191e-11	0.428068	0.981	0.954	4.86809e-07	Rbm39	aCM/AVC	Two-sided Wilcoxon test	0.25	25
4.64465e-05	0.4269	0.563	0.52	1	Ap2b1	aCM/AVC	Two-sided Wilcoxon test	0.25	25
1.33703e-08	0.426469	0.468	0.26	0.00031114	Nr2f2	aCM/AVC	Two-sided Wilcoxon test	0.25	25
0.00188565	0.42627	0.462	0.428	1	Pik3c2a	aCM/AVC	Two-sided Wilcoxon test	0.25	25
0.000242407	0.426017	0.614	0.553	1	Rap1gds1	aCM/AVC	Two-sided Wilcoxon test	0.25	25
0.000533509	0.425868	0.405	0.328	1	C2cd5	aCM/AVC	Two-sided Wilcoxon test	0.25	25
1.1948e-12	0.425672	0.253	0.082	2.78042e-08	Gm9801	aCM/AVC	Two-sided Wilcoxon test	0.25	25
8.59781e-05	0.425393	0.31	0.192	1	Gm28376	aCM/AVC	Two-sided Wilcoxon test	0.25	25
7.97174e-05	0.425353	0.329	0.223	1	Dock9	aCM/AVC	Two-sided Wilcoxon test	0.25	25
0.000669426	0.424513	0.418	0.355	1	Atl2	aCM/AVC	Two-sided Wilcoxon test	0.25	25
4.28928e-07	0.424449	0.867	0.78	0.00998159	Tcf12	aCM/AVC	Two-sided Wilcoxon test	0.25	25
7.17512e-05	0.424017	0.658	0.621	1	Erbin	aCM/AVC	Two-sided Wilcoxon test	0.25	25
0.00276085	0.423359	0.348	0.278	1	Flnb	aCM/AVC	Two-sided Wilcoxon test	0.25	25
0.000189871	0.422238	0.323	0.218	1	Lhfpl2	aCM/AVC	Two-sided Wilcoxon test	0.25	25
0.000370417	0.420875	0.62	0.589	1	Foxj3	aCM/AVC	Two-sided Wilcoxon test	0.25	25
8.06317e-06	0.419578	0.759	0.707	0.187638	Thoc2	aCM/AVC	Two-sided Wilcoxon test	0.25	25
0.000256845	0.41791	0.582	0.544	1	Dmxl1	aCM/AVC	Two-sided Wilcoxon test	0.25	25
2.6681e-05	0.417765	0.734	0.666	0.620894	Camta1	aCM/AVC	Two-sided Wilcoxon test	0.25	25
0.000881305	0.417587	0.468	0.403	1	Gbe1	aCM/AVC	Two-sided Wilcoxon test	0.25	25
0.00250188	0.417537	0.595	0.598	1	Cstf3	aCM/AVC	Two-sided Wilcoxon test	0.25	25
0.00240345	0.417418	0.487	0.45	1	Mapk8	aCM/AVC	Two-sided Wilcoxon test	0.25	25
3.07132e-05	0.416859	0.696	0.62	0.714727	Rlim	aCM/AVC	Two-sided Wilcoxon test	0.25	25
0.00886455	0.416858	0.576	0.576	1	Atp13a3	aCM/AVC	Two-sided Wilcoxon test	0.25	25
4.06008e-07	0.416711	0.88	0.787	0.00944821	Zfpm2	aCM/AVC	Two-sided Wilcoxon test	0.25	25
6.04042e-05	0.41667	0.753	0.73	1	Rbms1	aCM/AVC	Two-sided Wilcoxon test	0.25	25
0.000104276	0.415754	0.741	0.74	1	Npepps	aCM/AVC	Two-sided Wilcoxon test	0.25	25
0.000196399	0.415639	0.582	0.498	1	Kcnn2	aCM/AVC	Two-sided Wilcoxon test	0.25	25
2.68497e-06	0.414673	0.728	0.687	0.0624819	Faf1	aCM/AVC	Two-sided Wilcoxon test	0.25	25
8.70546e-07	0.414372	0.316	0.181	0.0202585	Pfkfb3	aCM/AVC	Two-sided Wilcoxon test	0.25	25
6.72035e-06	0.414095	0.734	0.696	0.156389	Lims1	aCM/AVC	Two-sided Wilcoxon test	0.25	25
0.00328038	0.412802	0.462	0.428	1	Fer	aCM/AVC	Two-sided Wilcoxon test	0.25	25
1.53601e-09	0.412725	0.911	0.83	3.57444e-05	Rere	aCM/AVC	Two-sided Wilcoxon test	0.25	25
0.000801825	0.411532	0.506	0.45	1	Myo1b	aCM/AVC	Two-sided Wilcoxon test	0.25	25
6.07954e-05	0.41054	0.418	0.301	1	Bicc1	aCM/AVC	Two-sided Wilcoxon test	0.25	25
0.00320788	0.408613	0.589	0.566	1	Clcn3	aCM/AVC	Two-sided Wilcoxon test	0.25	25
0.0010467	0.408288	0.5	0.461	1	Map3k2	aCM/AVC	Two-sided Wilcoxon test	0.25	25
0.00515941	0.408064	0.601	0.595	1	Kdm6a	aCM/AVC	Two-sided Wilcoxon test	0.25	25
0.000113172	0.408062	0.652	0.622	1	Cdk13	aCM/AVC	Two-sided Wilcoxon test	0.25	25
0.00121081	0.407292	0.487	0.434	1	Sort1	aCM/AVC	Two-sided Wilcoxon test	0.25	25
1.43779e-05	0.407076	0.69	0.608	0.334588	Actn1	aCM/AVC	Two-sided Wilcoxon test	0.25	25
5.66466e-06	0.406591	0.456	0.333	0.131822	Gm49959	aCM/AVC	Two-sided Wilcoxon test	0.25	25
7.17113e-05	0.405407	0.532	0.456	1	Acaca	aCM/AVC	Two-sided Wilcoxon test	0.25	25
5.96503e-06	0.405391	0.684	0.611	0.138812	Arhgef12	aCM/AVC	Two-sided Wilcoxon test	0.25	25
0.00293472	0.404975	0.424	0.376	1	Fyn	aCM/AVC	Two-sided Wilcoxon test	0.25	25
0.000208389	0.4049	0.589	0.529	1	Vti1a	aCM/AVC	Two-sided Wilcoxon test	0.25	25
9.13977e-06	0.404773	0.766	0.726	0.212692	Strbp	aCM/AVC	Two-sided Wilcoxon test	0.25	25
0.000856414	0.404674	0.43	0.377	1	Sgce	aCM/AVC	Two-sided Wilcoxon test	0.25	25
1.95498e-05	0.404286	0.753	0.712	0.454944	Meis1	aCM/AVC	Two-sided Wilcoxon test	0.25	25
7.51227e-05	0.402763	0.576	0.502	1	Plcb4	aCM/AVC	Two-sided Wilcoxon test	0.25	25
1.55746e-07	0.401795	0.747	0.667	0.00362436	Ddx50	aCM/AVC	Two-sided Wilcoxon test	0.25	25
0.00261317	0.401604	0.658	0.656	1	Zmiz1	aCM/AVC	Two-sided Wilcoxon test	0.25	25
0.00294828	0.400206	0.468	0.396	1	Gramd1b	aCM/AVC	Two-sided Wilcoxon test	0.25	25
0.00609675	0.399557	0.582	0.569	1	Pard3b	aCM/AVC	Two-sided Wilcoxon test	0.25	25
1.21306e-06	0.399538	0.62	0.499	0.0282291	Fam13b	aCM/AVC	Two-sided Wilcoxon test	0.25	25
2.6381e-07	0.397784	0.753	0.665	0.00613913	Mycbp2	aCM/AVC	Two-sided Wilcoxon test	0.25	25
0.00185293	0.396575	0.456	0.395	1	Sec24d	aCM/AVC	Two-sided Wilcoxon test	0.25	25
5.60606e-06	0.396237	0.715	0.65	0.130459	Scmh1	aCM/AVC	Two-sided Wilcoxon test	0.25	25
0.000116871	0.395841	0.728	0.686	1	Plagl1	aCM/AVC	Two-sided Wilcoxon test	0.25	25
7.2279e-06	0.395739	0.696	0.621	0.1682	Dip2c	aCM/AVC	Two-sided Wilcoxon test	0.25	25
3.17657e-06	0.395267	0.766	0.763	0.0739218	Pum1	aCM/AVC	Two-sided Wilcoxon test	0.25	25
0.00104786	0.394461	0.323	0.234	1	Srgap1	aCM/AVC	Two-sided Wilcoxon test	0.25	25
0.00888952	0.394252	0.519	0.485	1	Mpdz	aCM/AVC	Two-sided Wilcoxon test	0.25	25
0.000334334	0.394208	0.671	0.613	1	Mlip	aCM/AVC	Two-sided Wilcoxon test	0.25	25
0.00011703	0.393932	0.5	0.405	1	Avl9	aCM/AVC	Two-sided Wilcoxon test	0.25	25
9.72031e-08	0.392984	0.81	0.801	0.00226201	Rbfox2	aCM/AVC	Two-sided Wilcoxon test	0.25	25
1.27857e-05	0.391304	0.684	0.618	0.297536	Tmcc1	aCM/AVC	Two-sided Wilcoxon test	0.25	25
7.19452e-06	0.391039	0.842	0.794	0.167424	Clic4	aCM/AVC	Two-sided Wilcoxon test	0.25	25
0.000210909	0.390426	0.627	0.567	1	Numb	aCM/AVC	Two-sided Wilcoxon test	0.25	25
8.50021e-05	0.390204	0.525	0.451	1	Ino80	aCM/AVC	Two-sided Wilcoxon test	0.25	25
8.57711e-06	0.390079	0.797	0.746	0.199598	Ptbp2	aCM/AVC	Two-sided Wilcoxon test	0.25	25
0.000207355	0.390072	0.576	0.532	1	Pias2	aCM/AVC	Two-sided Wilcoxon test	0.25	25
0.000239606	0.389638	0.329	0.229	1	Scn5a	aCM/AVC	Two-sided Wilcoxon test	0.25	25
4.7819e-07	0.389184	0.709	0.625	0.0111279	Zfp407	aCM/AVC	Two-sided Wilcoxon test	0.25	25
0.000273962	0.388979	0.557	0.515	1	Prkag2	aCM/AVC	Two-sided Wilcoxon test	0.25	25
0.000541532	0.388958	0.652	0.645	1	Tcf7l2	aCM/AVC	Two-sided Wilcoxon test	0.25	25
0.00115302	0.38869	0.595	0.578	1	Kdm2a	aCM/AVC	Two-sided Wilcoxon test	0.25	25
0.000291912	0.38823	0.715	0.707	1	Trpm7	aCM/AVC	Two-sided Wilcoxon test	0.25	25
0.00035271	0.387906	0.627	0.611	1	Klhl7	aCM/AVC	Two-sided Wilcoxon test	0.25	25
8.10895e-05	0.387627	0.272	0.167	1	Daam2	aCM/AVC	Two-sided Wilcoxon test	0.25	25
0.00401528	0.386589	0.582	0.566	1	Rapgef2	aCM/AVC	Two-sided Wilcoxon test	0.25	25
0.000768509	0.385823	0.639	0.641	1	Pkp2	aCM/AVC	Two-sided Wilcoxon test	0.25	25
5.22368e-06	0.385207	0.671	0.585	0.12156	Asxl1	aCM/AVC	Two-sided Wilcoxon test	0.25	25
1.0166e-06	0.382938	0.842	0.788	0.0236574	Tut4	aCM/AVC	Two-sided Wilcoxon test	0.25	25
0.00330215	0.382904	0.557	0.536	1	Cwc27	aCM/AVC	Two-sided Wilcoxon test	0.25	25
0.00200519	0.382352	0.601	0.559	1	Tbc1d5	aCM/AVC	Two-sided Wilcoxon test	0.25	25
0.000194082	0.380805	0.646	0.638	1	Btbd7	aCM/AVC	Two-sided Wilcoxon test	0.25	25
1.26062e-05	0.380491	0.753	0.696	0.293358	App	aCM/AVC	Two-sided Wilcoxon test	0.25	25
0.00222772	0.380146	0.424	0.366	1	Slc4a4	aCM/AVC	Two-sided Wilcoxon test	0.25	25
0.00465948	0.379443	0.576	0.583	1	Cab39	aCM/AVC	Two-sided Wilcoxon test	0.25	25
0.000448779	0.379361	0.525	0.463	1	Atf7ip	aCM/AVC	Two-sided Wilcoxon test	0.25	25
6.68626e-05	0.379102	0.57	0.492	1	Slc4a7	aCM/AVC	Two-sided Wilcoxon test	0.25	25
0.000176644	0.378243	0.481	0.404	1	Vps13d	aCM/AVC	Two-sided Wilcoxon test	0.25	25
0.0007393	0.377178	0.576	0.526	1	Fam168a	aCM/AVC	Two-sided Wilcoxon test	0.25	25
2.52613e-05	0.376675	0.658	0.617	0.587855	Ubn2	aCM/AVC	Two-sided Wilcoxon test	0.25	25
0.00132657	0.376079	0.696	0.669	1	Gnaq	aCM/AVC	Two-sided Wilcoxon test	0.25	25
3.08493e-05	0.373509	0.684	0.648	0.717893	Rab5a	aCM/AVC	Two-sided Wilcoxon test	0.25	25
4.48831e-06	0.372207	0.266	0.143	0.104448	Ophn1	aCM/AVC	Two-sided Wilcoxon test	0.25	25
0.00084328	0.371785	0.57	0.533	1	Bmt2	aCM/AVC	Two-sided Wilcoxon test	0.25	25
0.00216827	0.371065	0.335	0.25	1	Klf12	aCM/AVC	Two-sided Wilcoxon test	0.25	25
0.00139611	0.370116	0.589	0.57	1	Usp3	aCM/AVC	Two-sided Wilcoxon test	0.25	25
0.0011372	0.368845	0.646	0.598	1	Pkp4	aCM/AVC	Two-sided Wilcoxon test	0.25	25
0.000116592	0.368326	0.703	0.679	1	Snd1	aCM/AVC	Two-sided Wilcoxon test	0.25	25
2.32004e-05	0.367395	0.753	0.678	0.539897	Large1	aCM/AVC	Two-sided Wilcoxon test	0.25	25
0.00401292	0.367002	0.449	0.409	1	Rps6ka3	aCM/AVC	Two-sided Wilcoxon test	0.25	25
0.00232731	0.366358	0.525	0.506	1	Map4k5	aCM/AVC	Two-sided Wilcoxon test	0.25	25
0.00428478	0.366026	0.677	0.624	1	Trdn	aCM/AVC	Two-sided Wilcoxon test	0.25	25
0.000179913	0.365634	0.766	0.754	1	Tnrc6b	aCM/AVC	Two-sided Wilcoxon test	0.25	25
0.00129851	0.364848	0.519	0.489	1	Atp9b	aCM/AVC	Two-sided Wilcoxon test	0.25	25
0.00916833	0.364749	0.449	0.422	1	Khdc4	aCM/AVC	Two-sided Wilcoxon test	0.25	25
0.000324262	0.364722	0.373	0.267	1	Gm46367	aCM/AVC	Two-sided Wilcoxon test	0.25	25
0.0025703	0.364314	0.266	0.189	1	Plekhm3	aCM/AVC	Two-sided Wilcoxon test	0.25	25
8.22151e-08	0.362449	0.943	0.858	0.00191323	Macf1	aCM/AVC	Two-sided Wilcoxon test	0.25	25
4.12798e-05	0.362422	0.614	0.535	0.960623	Zfp827	aCM/AVC	Two-sided Wilcoxon test	0.25	25
2.69734e-05	0.362207	0.316	0.196	0.627698	Optn	aCM/AVC	Two-sided Wilcoxon test	0.25	25
0.00376483	0.361892	0.373	0.321	1	Mcu	aCM/AVC	Two-sided Wilcoxon test	0.25	25
0.00172918	0.361186	0.576	0.581	1	Nmt2	aCM/AVC	Two-sided Wilcoxon test	0.25	25
0.000889608	0.36077	0.544	0.499	1	Clasp2	aCM/AVC	Two-sided Wilcoxon test	0.25	25
0.00487075	0.359866	0.614	0.6	1	Map4	aCM/AVC	Two-sided Wilcoxon test	0.25	25
3.16143e-05	0.359718	0.741	0.664	0.735696	Smg6	aCM/AVC	Two-sided Wilcoxon test	0.25	25
0.00427992	0.358938	0.589	0.582	1	Fbxo11	aCM/AVC	Two-sided Wilcoxon test	0.25	25
0.00270463	0.358303	0.582	0.568	1	Kdm5c	aCM/AVC	Two-sided Wilcoxon test	0.25	25
0.000755084	0.358164	0.671	0.676	1	Ube2g1	aCM/AVC	Two-sided Wilcoxon test	0.25	25
0.000376584	0.35767	0.633	0.571	1	Dennd1a	aCM/AVC	Two-sided Wilcoxon test	0.25	25
0.000146702	0.357538	0.348	0.246	1	Bcr	aCM/AVC	Two-sided Wilcoxon test	0.25	25
0.000851285	0.357391	0.323	0.243	1	2900026A02Rik	aCM/AVC	Two-sided Wilcoxon test	0.25	25
0.000329319	0.357297	0.576	0.529	1	Hnrnpll	aCM/AVC	Two-sided Wilcoxon test	0.25	25
0.00121777	0.357119	0.481	0.435	1	Mon2	aCM/AVC	Two-sided Wilcoxon test	0.25	25
0.000255595	0.356726	0.614	0.592	1	Thoc1	aCM/AVC	Two-sided Wilcoxon test	0.25	25
0.000583328	0.356461	0.601	0.57	1	Ambra1	aCM/AVC	Two-sided Wilcoxon test	0.25	25
0.00314828	0.356053	0.62	0.614	1	Sptan1	aCM/AVC	Two-sided Wilcoxon test	0.25	25
0.000772782	0.35596	0.589	0.549	1	Smurf2	aCM/AVC	Two-sided Wilcoxon test	0.25	25
0.000563453	0.35584	0.361	0.27	1	Kif16b	aCM/AVC	Two-sided Wilcoxon test	0.25	25
0.00274375	0.354007	0.519	0.495	1	Pgm5	aCM/AVC	Two-sided Wilcoxon test	0.25	25
0.00048392	0.353662	0.386	0.28	1	P2ry14	aCM/AVC	Two-sided Wilcoxon test	0.25	25
0.000656644	0.353657	0.608	0.586	1	Tacc1	aCM/AVC	Two-sided Wilcoxon test	0.25	25
0.00929371	0.35271	0.506	0.491	1	Psd3	aCM/AVC	Two-sided Wilcoxon test	0.25	25
0.000706235	0.351022	0.646	0.624	1	Akt3	aCM/AVC	Two-sided Wilcoxon test	0.25	25
0.00192828	0.350299	0.703	0.695	1	Luzp1	aCM/AVC	Two-sided Wilcoxon test	0.25	25
0.00176007	0.349353	0.544	0.485	1	Ahcyl2	aCM/AVC	Two-sided Wilcoxon test	0.25	25
0.00692103	0.34745	0.386	0.338	1	Fam171a1	aCM/AVC	Two-sided Wilcoxon test	0.25	25
1.40142e-09	0.346659	0.937	0.809	3.26124e-05	Igf1r	aCM/AVC	Two-sided Wilcoxon test	0.25	25
0.00595952	0.346583	0.348	0.294	1	Atg13	aCM/AVC	Two-sided Wilcoxon test	0.25	25
0.00091816	0.346289	0.57	0.544	1	Tab2	aCM/AVC	Two-sided Wilcoxon test	0.25	25
0.000108173	0.346284	0.582	0.512	1	Fnip1	aCM/AVC	Two-sided Wilcoxon test	0.25	25
0.000142043	0.345726	0.69	0.634	1	Hipk2	aCM/AVC	Two-sided Wilcoxon test	0.25	25
0.000486608	0.345576	0.627	0.584	1	Ralgapa1	aCM/AVC	Two-sided Wilcoxon test	0.25	25
0.000922696	0.345459	0.589	0.543	1	Dnajc1	aCM/AVC	Two-sided Wilcoxon test	0.25	25
0.00746301	0.344638	0.506	0.486	1	Aig1	aCM/AVC	Two-sided Wilcoxon test	0.25	25
0.000843551	0.343835	0.627	0.607	1	Ptk2	aCM/AVC	Two-sided Wilcoxon test	0.25	25
2.09657e-09	0.343543	1	1	4.87893e-05	Gm42418	aCM/AVC	Two-sided Wilcoxon test	0.25	25
0.00548938	0.343249	0.475	0.427	1	Spred2	aCM/AVC	Two-sided Wilcoxon test	0.25	25
0.00112179	0.34307	0.69	0.656	1	Dip2b	aCM/AVC	Two-sided Wilcoxon test	0.25	25
0.00119522	0.342201	0.633	0.632	1	Pja2	aCM/AVC	Two-sided Wilcoxon test	0.25	25
0.00283172	0.342004	0.671	0.655	1	Kif1b	aCM/AVC	Two-sided Wilcoxon test	0.25	25
0.00558838	0.341985	0.481	0.461	1	Lpin2	aCM/AVC	Two-sided Wilcoxon test	0.25	25
0.00111776	0.341983	0.608	0.565	1	Fhl2	aCM/AVC	Two-sided Wilcoxon test	0.25	25
0.00116105	0.341196	0.304	0.219	1	Slc38a9	aCM/AVC	Two-sided Wilcoxon test	0.25	25
0.000342475	0.340699	0.652	0.617	1	Farp1	aCM/AVC	Two-sided Wilcoxon test	0.25	25
0.000644472	0.340559	0.842	0.854	1	Itgb1	aCM/AVC	Two-sided Wilcoxon test	0.25	25
2.29907e-05	0.340073	0.709	0.673	0.535017	R3hdm1	aCM/AVC	Two-sided Wilcoxon test	0.25	25
6.4428e-05	0.339686	0.861	0.819	1	Atrx	aCM/AVC	Two-sided Wilcoxon test	0.25	25
0.000386412	0.33933	0.386	0.299	1	Asb3	aCM/AVC	Two-sided Wilcoxon test	0.25	25
3.63969e-05	0.338656	0.38	0.26	0.846993	Snx29	aCM/AVC	Two-sided Wilcoxon test	0.25	25
0.000295189	0.338134	0.633	0.6	1	Rabgap1	aCM/AVC	Two-sided Wilcoxon test	0.25	25
0.000105315	0.337531	0.658	0.605	1	Ap3b1	aCM/AVC	Two-sided Wilcoxon test	0.25	25
0.0099021	0.337199	0.443	0.404	1	Nfkb1	aCM/AVC	Two-sided Wilcoxon test	0.25	25
7.85305e-05	0.337164	0.487	0.393	1	Thada	aCM/AVC	Two-sided Wilcoxon test	0.25	25
0.0010523	0.336708	0.639	0.62	1	Wdfy3	aCM/AVC	Two-sided Wilcoxon test	0.25	25
3.89442e-06	0.336568	0.842	0.755	0.090627	Magi3	aCM/AVC	Two-sided Wilcoxon test	0.25	25
3.70282e-05	0.336108	0.81	0.742	0.861682	Kcnq1ot1	aCM/AVC	Two-sided Wilcoxon test	0.25	25
0.000308825	0.336085	0.538	0.46	1	Plekha5	aCM/AVC	Two-sided Wilcoxon test	0.25	25
0.000788789	0.335252	0.639	0.62	1	Pds5a	aCM/AVC	Two-sided Wilcoxon test	0.25	25
0.00339726	0.335043	0.5	0.457	1	Phkb	aCM/AVC	Two-sided Wilcoxon test	0.25	25
0.00118391	0.333295	0.342	0.261	1	Lyst	aCM/AVC	Two-sided Wilcoxon test	0.25	25
0.00838297	0.333149	0.544	0.51	1	Med12l	aCM/AVC	Two-sided Wilcoxon test	0.25	25
0.00132799	0.332766	0.639	0.68	1	Ube2h	aCM/AVC	Two-sided Wilcoxon test	0.25	25
0.00330341	0.332687	0.519	0.491	1	Rreb1	aCM/AVC	Two-sided Wilcoxon test	0.25	25
1.52562e-06	0.332617	1	1	0.0355026	Hba-a2	aCM/AVC	Two-sided Wilcoxon test	0.25	25
0.0068953	0.331818	0.5	0.476	1	Tgfbr1	aCM/AVC	Two-sided Wilcoxon test	0.25	25
2.2501e-05	0.331059	0.823	0.781	0.523621	Srek1	aCM/AVC	Two-sided Wilcoxon test	0.25	25
5.47484e-07	0.330642	0.835	0.777	0.0127405	Chd7	aCM/AVC	Two-sided Wilcoxon test	0.25	25
0.00115674	0.328726	0.589	0.561	1	Jph2	aCM/AVC	Two-sided Wilcoxon test	0.25	25
0.00588942	0.328431	0.677	0.701	1	Cpsf6	aCM/AVC	Two-sided Wilcoxon test	0.25	25
0.00140279	0.32795	0.506	0.45	1	Slc25a36	aCM/AVC	Two-sided Wilcoxon test	0.25	25
8.7501e-05	0.32783	0.608	0.549	1	Bmpr2	aCM/AVC	Two-sided Wilcoxon test	0.25	25
0.00112433	0.327818	0.525	0.484	1	Mapkap1	aCM/AVC	Two-sided Wilcoxon test	0.25	25
0.00270249	0.327626	0.557	0.511	1	Zdhhc20	aCM/AVC	Two-sided Wilcoxon test	0.25	25
0.00111442	0.327196	0.557	0.518	1	Spred1	aCM/AVC	Two-sided Wilcoxon test	0.25	25
0.00715409	0.326152	0.487	0.443	1	Peli1	aCM/AVC	Two-sided Wilcoxon test	0.25	25
0.00153837	0.325782	0.608	0.604	1	Epb41	aCM/AVC	Two-sided Wilcoxon test	0.25	25
9.76402e-05	0.325136	0.684	0.622	1	Atad2b	aCM/AVC	Two-sided Wilcoxon test	0.25	25
0.000965071	0.323681	0.43	0.367	1	Zfp445	aCM/AVC	Two-sided Wilcoxon test	0.25	25
0.00404017	0.323007	0.589	0.58	1	Erc1	aCM/AVC	Two-sided Wilcoxon test	0.25	25
0.00299555	0.322669	0.5	0.457	1	Arnt	aCM/AVC	Two-sided Wilcoxon test	0.25	25
0.000277529	0.322072	0.715	0.654	1	Tnks	aCM/AVC	Two-sided Wilcoxon test	0.25	25
0.00320933	0.321139	0.335	0.265	1	Mroh1	aCM/AVC	Two-sided Wilcoxon test	0.25	25
0.00243289	0.321103	0.544	0.485	1	AW554918	aCM/AVC	Two-sided Wilcoxon test	0.25	25
0.000436666	0.320569	0.816	0.811	1	Rock1	aCM/AVC	Two-sided Wilcoxon test	0.25	25
0.00578006	0.318958	0.259	0.189	1	Zc3h12b	aCM/AVC	Two-sided Wilcoxon test	0.25	25
0.00193326	0.31838	0.601	0.56	1	Ncoa1	aCM/AVC	Two-sided Wilcoxon test	0.25	25
0.00526229	0.318272	0.747	0.754	1	Atp2b1	aCM/AVC	Two-sided Wilcoxon test	0.25	25
4.49499e-06	0.317513	0.848	0.806	0.104603	Stag1	aCM/AVC	Two-sided Wilcoxon test	0.25	25
0.000288634	0.316649	0.823	0.782	1	Fbn2	aCM/AVC	Two-sided Wilcoxon test	0.25	25
0.00230568	0.315874	0.475	0.41	1	Trerf1	aCM/AVC	Two-sided Wilcoxon test	0.25	25
0.000811329	0.315047	0.81	0.779	1	Stk39	aCM/AVC	Two-sided Wilcoxon test	0.25	25
0.000171437	0.314433	0.93	0.902	1	mt-Nd5	aCM/AVC	Two-sided Wilcoxon test	0.25	25
0.00190928	0.314428	0.671	0.668	1	Crebbp	aCM/AVC	Two-sided Wilcoxon test	0.25	25
0.000416989	0.314329	0.854	0.897	1	Camk1d	aCM/AVC	Two-sided Wilcoxon test	0.25	25
0.00267369	0.313616	0.614	0.586	1	Kdm5a	aCM/AVC	Two-sided Wilcoxon test	0.25	25
1.72155e-05	0.312963	1	1	0.400622	Hba-a1	aCM/AVC	Two-sided Wilcoxon test	0.25	25
0.00021552	0.312883	0.658	0.574	1	Vps13b	aCM/AVC	Two-sided Wilcoxon test	0.25	25
6.15702e-05	0.311741	0.709	0.67	1	Cnot4	aCM/AVC	Two-sided Wilcoxon test	0.25	25
2.49009e-05	0.311576	0.778	0.73	0.57947	Trip12	aCM/AVC	Two-sided Wilcoxon test	0.25	25
3.08653e-05	0.311414	0.842	0.785	0.718267	Tnks2	aCM/AVC	Two-sided Wilcoxon test	0.25	25
0.00221924	0.310846	0.538	0.492	1	Map4k3	aCM/AVC	Two-sided Wilcoxon test	0.25	25
1.26535e-06	0.308926	0.804	0.754	0.029446	Exoc4	aCM/AVC	Two-sided Wilcoxon test	0.25	25
0.000105121	0.308802	0.614	0.514	1	Pde3a	aCM/AVC	Two-sided Wilcoxon test	0.25	25
0.0006111	0.308717	0.696	0.685	1	Tra2a	aCM/AVC	Two-sided Wilcoxon test	0.25	25
0.00207821	0.308684	0.646	0.63	1	Ash1l	aCM/AVC	Two-sided Wilcoxon test	0.25	25
0.00543451	0.308106	0.791	0.815	1	Mef2c	aCM/AVC	Two-sided Wilcoxon test	0.25	25
0.00383426	0.306288	0.842	0.826	1	Ctnna1	aCM/AVC	Two-sided Wilcoxon test	0.25	25
0.00882139	0.306252	0.449	0.387	1	Ntm	aCM/AVC	Two-sided Wilcoxon test	0.25	25
0.000537361	0.305688	0.304	0.208	1	Crppa	aCM/AVC	Two-sided Wilcoxon test	0.25	25
2.21628e-05	0.305134	1	0.969	0.515751	Ttn	aCM/AVC	Two-sided Wilcoxon test	0.25	25
0.00700477	0.305104	0.563	0.544	1	Atf2	aCM/AVC	Two-sided Wilcoxon test	0.25	25
0.000147306	0.305022	0.354	0.242	1	Adcy5	aCM/AVC	Two-sided Wilcoxon test	0.25	25
0.00010306	0.304913	0.494	0.387	1	Rps6ka5	aCM/AVC	Two-sided Wilcoxon test	0.25	25
0.00273966	0.304599	0.386	0.319	1	Crtc3	aCM/AVC	Two-sided Wilcoxon test	0.25	25
0.00229046	0.302748	0.601	0.582	1	Cul3	aCM/AVC	Two-sided Wilcoxon test	0.25	25
0.00407567	0.301935	0.551	0.522	1	4930402H24Rik	aCM/AVC	Two-sided Wilcoxon test	0.25	25
0.00926807	0.301934	0.354	0.299	1	Sash1	aCM/AVC	Two-sided Wilcoxon test	0.25	25
0.00578454	0.301124	0.608	0.577	1	Rfx7	aCM/AVC	Two-sided Wilcoxon test	0.25	25
8.78003e-05	0.299718	0.671	0.605	1	Sppl3	aCM/AVC	Two-sided Wilcoxon test	0.25	25
0.000567321	0.295869	0.278	0.184	1	Slc25a53	aCM/AVC	Two-sided Wilcoxon test	0.25	25
0.00909589	0.295804	0.595	0.59	1	Ranbp2	aCM/AVC	Two-sided Wilcoxon test	0.25	25
0.00161028	0.295559	0.728	0.729	1	Zfp292	aCM/AVC	Two-sided Wilcoxon test	0.25	25
0.00978251	0.295103	0.354	0.294	1	Unc13b	aCM/AVC	Two-sided Wilcoxon test	0.25	25
3.00436e-09	0.294331	1	1	6.99145e-05	Hbb-bh1	aCM/AVC	Two-sided Wilcoxon test	0.25	25
0.000297206	0.293578	0.722	0.739	1	Psme4	aCM/AVC	Two-sided Wilcoxon test	0.25	25
0.00962562	0.293331	0.468	0.443	1	Nup214	aCM/AVC	Two-sided Wilcoxon test	0.25	25
0.00398807	0.292371	0.608	0.599	1	Zfp609	aCM/AVC	Two-sided Wilcoxon test	0.25	25
0.00534084	0.292131	0.513	0.489	1	Supt20	aCM/AVC	Two-sided Wilcoxon test	0.25	25
0.000269831	0.291175	0.741	0.703	1	Ubr5	aCM/AVC	Two-sided Wilcoxon test	0.25	25
0.0014546	0.289085	0.608	0.566	1	Rptor	aCM/AVC	Two-sided Wilcoxon test	0.25	25
0.00113272	0.287998	0.734	0.687	1	Dst	aCM/AVC	Two-sided Wilcoxon test	0.25	25
0.000176287	0.287879	0.696	0.642	1	Glg1	aCM/AVC	Two-sided Wilcoxon test	0.25	25
0.00721963	0.287454	0.506	0.499	1	Vps4b	aCM/AVC	Two-sided Wilcoxon test	0.25	25
0.00275252	0.287048	0.696	0.696	1	Akap9	aCM/AVC	Two-sided Wilcoxon test	0.25	25
0.00484504	0.286935	0.639	0.613	1	Cdkal1	aCM/AVC	Two-sided Wilcoxon test	0.25	25
0.00147726	0.286346	0.905	0.861	1	Gpc3	aCM/AVC	Two-sided Wilcoxon test	0.25	25
0.0044121	0.286171	0.861	0.832	1	mt-Nd4l	aCM/AVC	Two-sided Wilcoxon test	0.25	25
0.00259219	0.280457	0.658	0.659	1	Cdk12	aCM/AVC	Two-sided Wilcoxon test	0.25	25
0.00404317	0.279721	0.589	0.595	1	Hipk3	aCM/AVC	Two-sided Wilcoxon test	0.25	25
0.00352044	0.279583	0.601	0.555	1	mt-Atp8	aCM/AVC	Two-sided Wilcoxon test	0.25	25
0.00101154	0.279231	0.671	0.631	1	Mtmr3	aCM/AVC	Two-sided Wilcoxon test	0.25	25
0.0051798	0.27877	0.981	0.979	1	mt-Nd4	aCM/AVC	Two-sided Wilcoxon test	0.25	25
0.00800475	0.278713	0.62	0.613	1	Fam168b	aCM/AVC	Two-sided Wilcoxon test	0.25	25
0.000813352	0.278345	0.715	0.723	1	Rbm26	aCM/AVC	Two-sided Wilcoxon test	0.25	25
0.00112148	0.278205	0.854	0.835	1	Fermt2	aCM/AVC	Two-sided Wilcoxon test	0.25	25
0.000968542	0.27774	0.506	0.429	1	Kdm4c	aCM/AVC	Two-sided Wilcoxon test	0.25	25
4.6839e-05	0.276376	0.848	0.813	1	Lrrfip1	aCM/AVC	Two-sided Wilcoxon test	0.25	25
0.00686839	0.275608	0.62	0.589	1	Fto	aCM/AVC	Two-sided Wilcoxon test	0.25	25
0.00607052	0.275605	0.715	0.769	1	Chchd3	aCM/AVC	Two-sided Wilcoxon test	0.25	25
0.00243741	0.274032	0.475	0.391	1	Rasgef1b	aCM/AVC	Two-sided Wilcoxon test	0.25	25
0.00210124	0.272483	0.677	0.621	1	Trio	aCM/AVC	Two-sided Wilcoxon test	0.25	25
0.00406692	0.27095	0.601	0.571	1	Myo18a	aCM/AVC	Two-sided Wilcoxon test	0.25	25
0.00108684	0.267071	0.791	0.789	1	Huwe1	aCM/AVC	Two-sided Wilcoxon test	0.25	25
0.00236394	0.265376	0.658	0.663	1	Lcor	aCM/AVC	Two-sided Wilcoxon test	0.25	25
0.00990298	0.263862	0.639	0.632	1	Golga4	aCM/AVC	Two-sided Wilcoxon test	0.25	25
0.0042685	0.26301	1	0.997	1	mt-Co3	aCM/AVC	Two-sided Wilcoxon test	0.25	25
0.00563176	0.261511	0.456	0.401	1	Fam135a	aCM/AVC	Two-sided Wilcoxon test	0.25	25
0.000305411	0.26062	0.722	0.667	1	Ecpas	aCM/AVC	Two-sided Wilcoxon test	0.25	25
0.00872213	0.258008	0.646	0.635	1	Chd6	aCM/AVC	Two-sided Wilcoxon test	0.25	25
0.00926352	0.255016	0.652	0.623	1	Smg1	aCM/AVC	Two-sided Wilcoxon test	0.25	25
0.000165551	0.2541	0.677	0.609	1	Ubr3	aCM/AVC	Two-sided Wilcoxon test	0.25	25
0.00443926	0.251879	0.62	0.569	1	Hbb-bs	aCM/AVC	Two-sided Wilcoxon test	0.25	25
0.00496137	0.250387	0.633	0.623	1	Med13	aCM/AVC	Two-sided Wilcoxon test	0.25	25
6.81069e-58	1.19964	1	0.955	1.58492e-53	Mif	vCM2	Two-sided Wilcoxon test	0.25	25
4.62668e-55	0.444406	0.783	0.165	1.07668e-50	Hspb8	vCM2	Two-sided Wilcoxon test	0.25	25
1.47027e-54	1.19581	1	0.957	3.42147e-50	Ldha	vCM2	Two-sided Wilcoxon test	0.25	25
1.31999e-53	0.345277	0.632	0.102	3.07174e-49	Mgarp	vCM2	Two-sided Wilcoxon test	0.25	25
6.71657e-53	1.13221	1	0.889	1.56301e-48	Bsg	vCM2	Two-sided Wilcoxon test	0.25	25
8.57435e-52	1.11486	1	0.918	1.99534e-47	Cox8a	vCM2	Two-sided Wilcoxon test	0.25	25
5.58605e-51	0.419836	0.592	0.098	1.29993e-46	Cox4i2	vCM2	Two-sided Wilcoxon test	0.25	25
9.79941e-50	0.346701	0.671	0.128	2.28042e-45	Trib2	vCM2	Two-sided Wilcoxon test	0.25	25
1.36063e-49	0.602087	0.882	0.238	3.16633e-45	Capn6	vCM2	Two-sided Wilcoxon test	0.25	25
1.80408e-49	1.06437	1	0.853	4.19828e-45	Pgk1	vCM2	Two-sided Wilcoxon test	0.25	25
2.76426e-49	1.17087	1	0.996	6.43271e-45	Gapdh	vCM2	Two-sided Wilcoxon test	0.25	25
1.01909e-48	1.17234	0.993	0.665	2.37153e-44	Cst3	vCM2	Two-sided Wilcoxon test	0.25	25
2.21192e-47	0.313986	0.586	0.103	5.14737e-43	Ramp1	vCM2	Two-sided Wilcoxon test	0.25	25
2.67041e-47	0.991797	1	0.891	6.21431e-43	Cox7a2	vCM2	Two-sided Wilcoxon test	0.25	25
4.25528e-47	1.04808	1	0.953	9.90246e-43	Aldoa	vCM2	Two-sided Wilcoxon test	0.25	25
4.48057e-47	0.988256	1	0.905	1.04267e-42	Cox5a	vCM2	Two-sided Wilcoxon test	0.25	25
1.14392e-46	1.03233	1	0.91	2.66203e-42	Tnni1	vCM2	Two-sided Wilcoxon test	0.25	25
5.61324e-46	0.989858	1	0.874	1.30626e-41	Pgam1	vCM2	Two-sided Wilcoxon test	0.25	25
5.73466e-46	0.256185	0.454	0.061	1.33451e-41	H2-Ab1	vCM2	Two-sided Wilcoxon test	0.25	25
8.73973e-46	0.877702	0.974	0.393	2.03382e-41	Lbh	vCM2	Two-sided Wilcoxon test	0.25	25
3.09178e-45	0.89853	1	0.924	7.19488e-41	Cox4i1	vCM2	Two-sided Wilcoxon test	0.25	25
3.57037e-45	0.395337	0.855	0.218	8.30861e-41	Emc4	vCM2	Two-sided Wilcoxon test	0.25	25
1.10413e-44	0.833697	1	0.924	2.56942e-40	Cox7c	vCM2	Two-sided Wilcoxon test	0.25	25
1.58936e-44	1.05052	1	0.725	3.6986e-40	Uqcr10	vCM2	Two-sided Wilcoxon test	0.25	25
2.08017e-44	0.738597	1	0.998	4.84076e-40	Hsp90ab1	vCM2	Two-sided Wilcoxon test	0.25	25
5.59077e-44	1.02886	0.993	0.896	1.30103e-39	Crip2	vCM2	Two-sided Wilcoxon test	0.25	25
7.63044e-44	0.912267	1	0.911	1.77568e-39	Cox6c	vCM2	Two-sided Wilcoxon test	0.25	25
1.32744e-43	0.900878	1	0.683	3.08908e-39	Ndufb5	vCM2	Two-sided Wilcoxon test	0.25	25
1.42217e-43	1.05576	1	0.71	3.30953e-39	Uqcr11	vCM2	Two-sided Wilcoxon test	0.25	25
2.40777e-43	1.00698	1	0.711	5.60312e-39	Cryab	vCM2	Two-sided Wilcoxon test	0.25	25
2.69002e-43	0.91434	1	0.86	6.25995e-39	Atp5l	vCM2	Two-sided Wilcoxon test	0.25	25
2.99978e-43	0.904257	1	0.938	6.9808e-39	Ndufa4	vCM2	Two-sided Wilcoxon test	0.25	25
3.74478e-43	0.304609	0.664	0.142	8.71447e-39	Nutf2-ps1	vCM2	Two-sided Wilcoxon test	0.25	25
3.79001e-43	0.573828	0.928	0.295	8.81973e-39	Cyba	vCM2	Two-sided Wilcoxon test	0.25	25
8.04686e-43	0.865348	1	0.814	1.87259e-38	Atp5c1	vCM2	Two-sided Wilcoxon test	0.25	25
8.19667e-43	0.899456	0.993	0.656	1.90745e-38	Ndufs6	vCM2	Two-sided Wilcoxon test	0.25	25
1.34519e-42	1.08159	1	0.877	3.1304e-38	Hspb1	vCM2	Two-sided Wilcoxon test	0.25	25
7.44667e-42	0.936603	1	0.711	1.73291e-37	Des	vCM2	Two-sided Wilcoxon test	0.25	25
8.81919e-42	0.976238	1	0.891	2.05231e-37	Nme2	vCM2	Two-sided Wilcoxon test	0.25	25
1.06013e-41	0.852393	1	0.87	2.46703e-37	Cox5b	vCM2	Two-sided Wilcoxon test	0.25	25
1.09781e-41	0.301779	0.75	0.179	2.5547e-37	Serp2	vCM2	Two-sided Wilcoxon test	0.25	25
1.41185e-41	0.935265	1	0.889	3.28551e-37	Cox6b1	vCM2	Two-sided Wilcoxon test	0.25	25
2.62374e-41	0.841219	1	0.948	6.10571e-37	Pkm	vCM2	Two-sided Wilcoxon test	0.25	25
2.90884e-41	0.803786	1	0.99	6.76917e-37	Ppia	vCM2	Two-sided Wilcoxon test	0.25	25
5.5356e-41	0.827117	1	0.913	1.28819e-36	Tpi1	vCM2	Two-sided Wilcoxon test	0.25	25
2.98507e-40	1.01977	1	0.603	6.94656e-36	Fabp3	vCM2	Two-sided Wilcoxon test	0.25	25
5.73007e-40	0.8605	1	0.857	1.33344e-35	Atp5g1	vCM2	Two-sided Wilcoxon test	0.25	25
6.1677e-40	1.50189	1	0.894	1.43529e-35	Myl3	vCM2	Two-sided Wilcoxon test	0.25	25
8.38517e-40	0.881056	1	0.892	1.95131e-35	Gng5	vCM2	Two-sided Wilcoxon test	0.25	25
1.19667e-39	0.346861	0.776	0.205	2.78476e-35	Acyp1	vCM2	Two-sided Wilcoxon test	0.25	25
1.56516e-39	0.849654	1	0.906	3.64227e-35	Uqcrh	vCM2	Two-sided Wilcoxon test	0.25	25
2.69388e-39	0.867016	1	0.781	6.26893e-35	Cycs	vCM2	Two-sided Wilcoxon test	0.25	25
3.61595e-39	0.514137	0.809	0.222	8.41469e-35	Cox7a1	vCM2	Two-sided Wilcoxon test	0.25	25
5.42047e-39	0.879529	1	0.912	1.2614e-34	Atp5o	vCM2	Two-sided Wilcoxon test	0.25	25
5.93534e-39	0.89721	1	0.997	1.38121e-34	Myl4	vCM2	Two-sided Wilcoxon test	0.25	25
7.44454e-39	0.769608	1	0.505	1.73242e-34	Ciao2b	vCM2	Two-sided Wilcoxon test	0.25	25
7.84296e-39	0.808539	1	0.813	1.82513e-34	Ndufb9	vCM2	Two-sided Wilcoxon test	0.25	25
8.1616e-39	0.398396	0.849	0.247	1.89929e-34	Sap30	vCM2	Two-sided Wilcoxon test	0.25	25
1.1568e-38	0.34202	0.875	0.244	2.692e-34	Diablo	vCM2	Two-sided Wilcoxon test	0.25	25
1.61014e-38	1.23046	0.98	0.522	3.74696e-34	Cox6a2	vCM2	Two-sided Wilcoxon test	0.25	25
3.06056e-38	0.778642	1	0.743	7.12223e-34	Ndufc2	vCM2	Two-sided Wilcoxon test	0.25	25
3.1456e-38	0.373395	0.855	0.256	7.32013e-34	Smim20	vCM2	Two-sided Wilcoxon test	0.25	25
3.32221e-38	0.797239	1	0.892	7.73112e-34	Cox7b	vCM2	Two-sided Wilcoxon test	0.25	25
3.61762e-38	0.803316	1	0.794	8.41857e-34	Vdac2	vCM2	Two-sided Wilcoxon test	0.25	25
3.62727e-38	0.76011	0.993	0.458	8.44102e-34	Hspb2	vCM2	Two-sided Wilcoxon test	0.25	25
4.61702e-38	0.85824	1	0.701	1.07443e-33	Ndufa5	vCM2	Two-sided Wilcoxon test	0.25	25
9.19858e-38	0.793736	1	0.586	2.1406e-33	Aprt	vCM2	Two-sided Wilcoxon test	0.25	25
9.5392e-38	0.282736	0.717	0.181	2.21987e-33	Rangrf	vCM2	Two-sided Wilcoxon test	0.25	25
1.18172e-37	0.72117	1	0.963	2.74998e-33	Atp5b	vCM2	Two-sided Wilcoxon test	0.25	25
1.24852e-37	0.303272	0.73	0.184	2.90544e-33	Pcbd1	vCM2	Two-sided Wilcoxon test	0.25	25
1.40387e-37	0.819517	1	0.753	3.26694e-33	Idh2	vCM2	Two-sided Wilcoxon test	0.25	25
1.99051e-37	0.89644	1	0.843	4.63213e-33	Hspe1	vCM2	Two-sided Wilcoxon test	0.25	25
2.09329e-37	0.867931	1	0.961	4.87129e-33	Slc25a4	vCM2	Two-sided Wilcoxon test	0.25	25
3.0646e-37	0.868967	1	0.76	7.13164e-33	Micos10	vCM2	Two-sided Wilcoxon test	0.25	25
3.63482e-37	0.877123	0.993	0.772	8.45859e-33	Atp5mpl	vCM2	Two-sided Wilcoxon test	0.25	25
4.44198e-37	0.342866	0.717	0.187	1.03369e-32	S100a13	vCM2	Two-sided Wilcoxon test	0.25	25
4.816e-37	0.830547	1	0.878	1.12073e-32	Atp5j2	vCM2	Two-sided Wilcoxon test	0.25	25
5.91283e-37	0.860623	1	0.6	1.37598e-32	Ndufv3	vCM2	Two-sided Wilcoxon test	0.25	25
7.8866e-37	0.330254	0.822	0.228	1.83529e-32	Pdxp	vCM2	Two-sided Wilcoxon test	0.25	25
8.38171e-37	0.773338	1	0.841	1.95051e-32	Mdh2	vCM2	Two-sided Wilcoxon test	0.25	25
9.95648e-37	0.795454	1	0.782	2.31697e-32	Vdac1	vCM2	Two-sided Wilcoxon test	0.25	25
1.08836e-36	0.471068	0.888	0.286	2.53272e-32	Mcrip2	vCM2	Two-sided Wilcoxon test	0.25	25
1.17276e-36	1.58802	0.987	0.777	2.72913e-32	Myl2	vCM2	Two-sided Wilcoxon test	0.25	25
1.25636e-36	0.754236	1	0.759	2.92367e-32	Ndufab1	vCM2	Two-sided Wilcoxon test	0.25	25
1.5722e-36	0.776512	1	0.81	3.65867e-32	Atp5g3	vCM2	Two-sided Wilcoxon test	0.25	25
1.82457e-36	0.323688	0.789	0.215	4.24596e-32	Gpx8	vCM2	Two-sided Wilcoxon test	0.25	25
1.94733e-36	0.827531	1	0.731	4.53163e-32	Fam162a	vCM2	Two-sided Wilcoxon test	0.25	25
2.0716e-36	0.722632	0.908	0.378	4.82082e-32	Npm3	vCM2	Two-sided Wilcoxon test	0.25	25
2.17305e-36	0.871226	1	0.709	5.05692e-32	Higd1a	vCM2	Two-sided Wilcoxon test	0.25	25
4.96471e-36	0.785856	1	0.778	1.15534e-31	Fkbp3	vCM2	Two-sided Wilcoxon test	0.25	25
1.09589e-35	0.732156	1	0.957	2.55025e-31	Chchd2	vCM2	Two-sided Wilcoxon test	0.25	25
1.53047e-35	0.78075	1	0.622	3.56156e-31	Romo1	vCM2	Two-sided Wilcoxon test	0.25	25
1.69672e-35	0.853269	1	0.542	3.94845e-31	Gpx3	vCM2	Two-sided Wilcoxon test	0.25	25
1.70523e-35	0.809057	1	0.732	3.96825e-31	Myl12a	vCM2	Two-sided Wilcoxon test	0.25	25
1.77972e-35	0.813779	1	0.675	4.14158e-31	Atp6v0c	vCM2	Two-sided Wilcoxon test	0.25	25
1.92269e-35	0.287434	0.796	0.225	4.4743e-31	Mplkip	vCM2	Two-sided Wilcoxon test	0.25	25
1.9764e-35	0.573159	0.928	0.372	4.59927e-31	Mrpl36	vCM2	Two-sided Wilcoxon test	0.25	25
2.07462e-35	0.750789	1	0.779	4.82785e-31	Ndufb8	vCM2	Two-sided Wilcoxon test	0.25	25
3.01097e-35	0.722162	1	0.984	7.00683e-31	Ybx1	vCM2	Two-sided Wilcoxon test	0.25	25
3.73361e-35	0.267298	0.776	0.198	8.68849e-31	Irx4	vCM2	Two-sided Wilcoxon test	0.25	25
4.47661e-35	0.271295	0.632	0.151	1.04175e-30	Stbd1	vCM2	Two-sided Wilcoxon test	0.25	25
4.61614e-35	0.256391	0.822	0.23	1.07422e-30	Cfap298	vCM2	Two-sided Wilcoxon test	0.25	25
5.14504e-35	0.706806	1	0.998	1.1973e-30	Fau	vCM2	Two-sided Wilcoxon test	0.25	25
8.23439e-35	0.766035	1	0.81	1.91623e-30	Gpi1	vCM2	Two-sided Wilcoxon test	0.25	25
9.09885e-35	0.260356	0.724	0.19	2.11739e-30	Rnd2	vCM2	Two-sided Wilcoxon test	0.25	25
9.28617e-35	0.65347	1	0.89	2.16099e-30	Ywhae	vCM2	Two-sided Wilcoxon test	0.25	25
1.25519e-34	0.599467	1	0.992	2.92095e-30	Rpl5	vCM2	Two-sided Wilcoxon test	0.25	25
1.30967e-34	0.786123	1	0.708	3.04774e-30	Ndufc1	vCM2	Two-sided Wilcoxon test	0.25	25
1.42721e-34	0.7445	1	0.68	3.32126e-30	Ndufa2	vCM2	Two-sided Wilcoxon test	0.25	25
1.47827e-34	0.502251	0.901	0.316	3.44007e-30	Hmgn3	vCM2	Two-sided Wilcoxon test	0.25	25
1.57245e-34	0.272851	0.757	0.205	3.65924e-30	Colgalt1	vCM2	Two-sided Wilcoxon test	0.25	25
1.67781e-34	0.292549	0.763	0.213	3.90442e-30	Tspan31	vCM2	Two-sided Wilcoxon test	0.25	25
1.73664e-34	0.736355	1	0.894	4.04134e-30	Atp5d	vCM2	Two-sided Wilcoxon test	0.25	25
1.73827e-34	0.941668	1	0.787	4.04513e-30	Sh3bgr	vCM2	Two-sided Wilcoxon test	0.25	25
1.85598e-34	0.377136	0.882	0.276	4.31905e-30	Bod1	vCM2	Two-sided Wilcoxon test	0.25	25
2.05532e-34	0.808104	1	0.651	4.78294e-30	Chchd10	vCM2	Two-sided Wilcoxon test	0.25	25
2.15194e-34	0.763919	1	0.854	5.00779e-30	Hint1	vCM2	Two-sided Wilcoxon test	0.25	25
3.49913e-34	0.674392	1	0.999	8.14282e-30	Rpl15	vCM2	Two-sided Wilcoxon test	0.25	25
6.81689e-34	0.755601	1	0.931	1.58636e-29	Hsp90aa1	vCM2	Two-sided Wilcoxon test	0.25	25
7.5256e-34	0.643768	1	0.997	1.75128e-29	Rpl19	vCM2	Two-sided Wilcoxon test	0.25	25
7.5307e-34	0.55522	0.941	0.357	1.75247e-29	Ppic	vCM2	Two-sided Wilcoxon test	0.25	25
7.64464e-34	0.279873	0.796	0.222	1.77899e-29	Gm2a	vCM2	Two-sided Wilcoxon test	0.25	25
9.31879e-34	0.314299	0.599	0.142	2.16857e-29	Perp	vCM2	Two-sided Wilcoxon test	0.25	25
1.05635e-33	0.631205	0.993	0.482	2.45823e-29	Mrpl53	vCM2	Two-sided Wilcoxon test	0.25	25
1.53691e-33	0.675962	1	0.971	3.57655e-29	Oaz1	vCM2	Two-sided Wilcoxon test	0.25	25
1.55921e-33	0.639285	0.974	0.418	3.62845e-29	Hspb7	vCM2	Two-sided Wilcoxon test	0.25	25
1.59129e-33	0.786047	1	0.727	3.70308e-29	Uqcrq	vCM2	Two-sided Wilcoxon test	0.25	25
1.72291e-33	0.629086	1	1	4.00939e-29	Eef1a1	vCM2	Two-sided Wilcoxon test	0.25	25
1.78504e-33	0.329622	0.829	0.251	4.15398e-29	Med30	vCM2	Two-sided Wilcoxon test	0.25	25
1.98357e-33	0.715932	1	0.727	4.61597e-29	Uqcrc2	vCM2	Two-sided Wilcoxon test	0.25	25
2.77789e-33	0.695486	1	0.88	6.46442e-29	Atp5h	vCM2	Two-sided Wilcoxon test	0.25	25
3.89719e-33	0.660181	1	0.656	9.06915e-29	Ndufv2	vCM2	Two-sided Wilcoxon test	0.25	25
4.97583e-33	0.670067	0.954	0.404	1.15793e-28	Anxa2	vCM2	Two-sided Wilcoxon test	0.25	25
5.31576e-33	0.683757	1	1	1.23703e-28	Tpm1	vCM2	Two-sided Wilcoxon test	0.25	25
5.55693e-33	0.79509	1	0.748	1.29315e-28	Atp5md	vCM2	Two-sided Wilcoxon test	0.25	25
5.66154e-33	0.432672	0.934	0.332	1.3175e-28	Rsl24d1	vCM2	Two-sided Wilcoxon test	0.25	25
5.70358e-33	0.752468	0.993	0.875	1.32728e-28	Hmgn1	vCM2	Two-sided Wilcoxon test	0.25	25
7.15803e-33	0.687181	1	0.918	1.66574e-28	Serf2	vCM2	Two-sided Wilcoxon test	0.25	25
1.37719e-32	0.703239	1	0.772	3.20485e-28	Atp5k	vCM2	Two-sided Wilcoxon test	0.25	25
1.52219e-32	0.714307	1	0.796	3.54228e-28	Atp5g2	vCM2	Two-sided Wilcoxon test	0.25	25
1.57033e-32	0.312726	0.513	0.112	3.65431e-28	Kcne1	vCM2	Two-sided Wilcoxon test	0.25	25
1.64477e-32	0.740036	1	0.738	3.82755e-28	Tomm20	vCM2	Two-sided Wilcoxon test	0.25	25
1.69055e-32	0.27018	0.842	0.249	3.93408e-28	Mrpl49	vCM2	Two-sided Wilcoxon test	0.25	25
1.72746e-32	0.666505	0.868	0.333	4.01997e-28	Hopx	vCM2	Two-sided Wilcoxon test	0.25	25
1.79951e-32	0.750718	1	0.878	4.18765e-28	Nap1l1	vCM2	Two-sided Wilcoxon test	0.25	25
2.63709e-32	0.75347	1	0.738	6.13678e-28	Ndufa13	vCM2	Two-sided Wilcoxon test	0.25	25
2.78747e-32	0.854587	1	0.825	6.48673e-28	Gyg	vCM2	Two-sided Wilcoxon test	0.25	25
3.02662e-32	0.420722	0.849	0.282	7.04324e-28	Bambi	vCM2	Two-sided Wilcoxon test	0.25	25
4.25626e-32	0.867125	1	0.902	9.90475e-28	Hspd1	vCM2	Two-sided Wilcoxon test	0.25	25
4.3626e-32	0.294471	0.822	0.25	1.01522e-27	Pigp	vCM2	Two-sided Wilcoxon test	0.25	25
4.62358e-32	0.828869	0.941	0.458	1.07595e-27	Bnip3	vCM2	Two-sided Wilcoxon test	0.25	25
5.97466e-32	0.521309	0.961	0.362	1.39036e-27	2410006H16Rik	vCM2	Two-sided Wilcoxon test	0.25	25
1.90193e-31	0.430326	0.947	0.338	4.42599e-27	Acot13	vCM2	Two-sided Wilcoxon test	0.25	25
1.92056e-31	0.283811	0.651	0.174	4.46933e-27	S100a1	vCM2	Two-sided Wilcoxon test	0.25	25
2.00128e-31	0.38189	0.888	0.299	4.65718e-27	Cyb5r3	vCM2	Two-sided Wilcoxon test	0.25	25
2.34082e-31	0.272697	0.809	0.246	5.44733e-27	Cd3eap	vCM2	Two-sided Wilcoxon test	0.25	25
2.9555e-31	0.660829	1	0.82	6.87775e-27	Rbx1	vCM2	Two-sided Wilcoxon test	0.25	25
3.40299e-31	0.720508	1	0.981	7.9191e-27	Rpl35a	vCM2	Two-sided Wilcoxon test	0.25	25
3.49815e-31	0.731092	1	0.767	8.14055e-27	Serpinh1	vCM2	Two-sided Wilcoxon test	0.25	25
3.79353e-31	0.263028	0.77	0.23	8.82793e-27	Tmed1	vCM2	Two-sided Wilcoxon test	0.25	25
4.63188e-31	0.688501	1	0.882	1.07788e-26	Pfn1	vCM2	Two-sided Wilcoxon test	0.25	25
6.00779e-31	0.94187	0.993	0.598	1.39807e-26	Bex1	vCM2	Two-sided Wilcoxon test	0.25	25
6.66948e-31	0.685585	1	0.673	1.55206e-26	Gpx4	vCM2	Two-sided Wilcoxon test	0.25	25
7.22393e-31	0.376641	0.862	0.294	1.68108e-26	Lage3	vCM2	Two-sided Wilcoxon test	0.25	25
8.38726e-31	0.662218	1	0.763	1.9518e-26	Uqcrb	vCM2	Two-sided Wilcoxon test	0.25	25
8.79008e-31	0.687884	0.993	0.83	2.04554e-26	Atp5f1	vCM2	Two-sided Wilcoxon test	0.25	25
9.74571e-31	0.619529	1	0.994	2.26793e-26	Rps13	vCM2	Two-sided Wilcoxon test	0.25	25
1.11042e-30	0.293108	0.789	0.241	2.58405e-26	Stard3nl	vCM2	Two-sided Wilcoxon test	0.25	25
1.29599e-30	0.6698	0.993	0.687	3.0159e-26	Mrpl42	vCM2	Two-sided Wilcoxon test	0.25	25
1.54118e-30	0.58646	1	0.991	3.58649e-26	Rps15	vCM2	Two-sided Wilcoxon test	0.25	25
2.07747e-30	0.744555	1	0.956	4.83448e-26	Tnnc1	vCM2	Two-sided Wilcoxon test	0.25	25
2.28106e-30	0.645324	0.987	0.702	5.30825e-26	Cox7a2l	vCM2	Two-sided Wilcoxon test	0.25	25
2.28977e-30	0.896158	1	0.977	5.32853e-26	Acta2	vCM2	Two-sided Wilcoxon test	0.25	25
2.3073e-30	0.529765	0.987	0.408	5.36931e-26	Cox14	vCM2	Two-sided Wilcoxon test	0.25	25
2.54922e-30	0.269242	0.763	0.23	5.93228e-26	Cmtm7	vCM2	Two-sided Wilcoxon test	0.25	25
2.76873e-30	0.680066	1	0.934	6.4431e-26	Btf3	vCM2	Two-sided Wilcoxon test	0.25	25
3.40625e-30	0.75405	1	0.897	7.92668e-26	Dynll1	vCM2	Two-sided Wilcoxon test	0.25	25
3.75144e-30	0.422245	0.928	0.339	8.72998e-26	Polr2d	vCM2	Two-sided Wilcoxon test	0.25	25
4.51205e-30	0.424389	0.822	0.277	1.05e-25	Fitm1	vCM2	Two-sided Wilcoxon test	0.25	25
4.7202e-30	0.725227	1	0.788	1.09844e-25	Snrpd1	vCM2	Two-sided Wilcoxon test	0.25	25
4.9062e-30	0.505838	0.829	0.28	1.14172e-25	Tcap	vCM2	Two-sided Wilcoxon test	0.25	25
5.52387e-30	0.326923	0.816	0.261	1.28546e-25	Gamt	vCM2	Two-sided Wilcoxon test	0.25	25
6.08527e-30	0.662208	0.993	0.534	1.4161e-25	Ndufb6	vCM2	Two-sided Wilcoxon test	0.25	25
6.12527e-30	0.663356	1	0.765	1.42541e-25	Ndufb7	vCM2	Two-sided Wilcoxon test	0.25	25
6.50003e-30	0.554489	0.993	0.482	1.51262e-25	Brk1	vCM2	Two-sided Wilcoxon test	0.25	25
6.66448e-30	0.906022	1	0.994	1.55089e-25	Myl7	vCM2	Two-sided Wilcoxon test	0.25	25
6.68065e-30	0.923341	0.993	0.622	1.55465e-25	Crip1	vCM2	Two-sided Wilcoxon test	0.25	25
8.0991e-30	0.337796	0.875	0.282	1.88474e-25	Pigx	vCM2	Two-sided Wilcoxon test	0.25	25
8.27035e-30	0.667418	1	0.88	1.92459e-25	Elob	vCM2	Two-sided Wilcoxon test	0.25	25
1.14978e-29	0.808005	0.987	0.75	2.67565e-25	Rps27l	vCM2	Two-sided Wilcoxon test	0.25	25
1.37048e-29	0.526108	0.967	0.443	3.18925e-25	Emc6	vCM2	Two-sided Wilcoxon test	0.25	25
1.50049e-29	0.699559	1	0.953	3.49178e-25	Myl6	vCM2	Two-sided Wilcoxon test	0.25	25
1.52667e-29	0.295577	0.809	0.258	3.55272e-25	Aph1a	vCM2	Two-sided Wilcoxon test	0.25	25
1.76456e-29	0.588312	0.993	0.559	4.10631e-25	Timm17a	vCM2	Two-sided Wilcoxon test	0.25	25
1.83222e-29	0.334654	0.868	0.296	4.26376e-25	Naxe	vCM2	Two-sided Wilcoxon test	0.25	25
1.84802e-29	0.271448	0.868	0.282	4.30053e-25	Ppp1r11	vCM2	Two-sided Wilcoxon test	0.25	25
1.88656e-29	0.410142	0.914	0.341	4.39021e-25	Mydgf	vCM2	Two-sided Wilcoxon test	0.25	25
1.90705e-29	0.628398	1	0.585	4.4379e-25	Timm13	vCM2	Two-sided Wilcoxon test	0.25	25
1.92154e-29	0.580078	0.967	0.418	4.47162e-25	Gm45716	vCM2	Two-sided Wilcoxon test	0.25	25
2.60673e-29	0.851456	1	0.999	6.06611e-25	Actc1	vCM2	Two-sided Wilcoxon test	0.25	25
2.80992e-29	0.680633	1	0.999	6.53895e-25	Rps15a	vCM2	Two-sided Wilcoxon test	0.25	25
3.81738e-29	0.563261	0.993	0.448	8.88344e-25	Pnkd	vCM2	Two-sided Wilcoxon test	0.25	25
3.98907e-29	0.263183	0.849	0.272	9.28296e-25	Tmem123	vCM2	Two-sided Wilcoxon test	0.25	25
4.27226e-29	0.561684	1	0.943	9.94199e-25	Atp5a1	vCM2	Two-sided Wilcoxon test	0.25	25
4.67842e-29	0.634141	1	0.673	1.08872e-24	Psma4	vCM2	Two-sided Wilcoxon test	0.25	25
4.97734e-29	0.261982	0.789	0.25	1.15828e-24	As3mt	vCM2	Two-sided Wilcoxon test	0.25	25
4.98488e-29	0.620865	0.98	0.513	1.16003e-24	Vegfb	vCM2	Two-sided Wilcoxon test	0.25	25
5.13408e-29	0.676288	1	0.987	1.19475e-24	Npm1	vCM2	Two-sided Wilcoxon test	0.25	25
5.43214e-29	0.595623	1	0.998	1.26411e-24	Rps14	vCM2	Two-sided Wilcoxon test	0.25	25
6.8454e-29	0.635604	1	0.753	1.59299e-24	Cyc1	vCM2	Two-sided Wilcoxon test	0.25	25
7.34035e-29	0.341283	0.895	0.314	1.70817e-24	Tex261	vCM2	Two-sided Wilcoxon test	0.25	25
8.18634e-29	0.288424	0.836	0.277	1.90504e-24	Ppif	vCM2	Two-sided Wilcoxon test	0.25	25
8.64437e-29	0.702642	0.993	0.77	2.01163e-24	Snrpd2	vCM2	Two-sided Wilcoxon test	0.25	25
1.02238e-28	0.642909	0.993	0.641	2.37918e-24	Mrpl12	vCM2	Two-sided Wilcoxon test	0.25	25
1.09257e-28	0.600084	1	0.998	2.54253e-24	Rps16	vCM2	Two-sided Wilcoxon test	0.25	25
1.17478e-28	0.356093	0.855	0.285	2.73383e-24	Ddt	vCM2	Two-sided Wilcoxon test	0.25	25
1.1797e-28	0.596809	1	0.649	2.74529e-24	Uqcrfs1	vCM2	Two-sided Wilcoxon test	0.25	25
1.24558e-28	0.281201	0.829	0.268	2.8986e-24	Snx12	vCM2	Two-sided Wilcoxon test	0.25	25
1.34161e-28	0.253445	0.941	0.316	3.12205e-24	Mrpl24	vCM2	Two-sided Wilcoxon test	0.25	25
1.52188e-28	0.565546	0.987	0.501	3.54157e-24	Anapc11	vCM2	Two-sided Wilcoxon test	0.25	25
1.66693e-28	0.315206	0.849	0.291	3.87911e-24	Timm22	vCM2	Two-sided Wilcoxon test	0.25	25
2.04271e-28	0.713481	0.882	0.354	4.7536e-24	Itm2a	vCM2	Two-sided Wilcoxon test	0.25	25
[truncated: 6,175 more rows]

## Sheet: Fig3h
Supplementary Data 1. Marker expression in different cardiac cell populations from control and Isl1cre/+Rnf20fl/fl embryos.
p_val	avg_log2FC	pct.1	pct.2	p_val_adj	gene	CELL_TYPE	Test_used	fc.threshold (log2)	min.pct (%)
0	2.63176	0.97	0.314	0	Vcan	EC1	Two-sided Wilcoxon test	0.25	25
0	2.4488	0.939	0.266	0	Ncam1	EC1	Two-sided Wilcoxon test	0.25	25
0	2.15495	0.867	0.237	0	Sox5	EC1	Two-sided Wilcoxon test	0.25	25
0	2.03266	0.91	0.162	0	Sox6	EC1	Two-sided Wilcoxon test	0.25	25
0	1.94147	0.946	0.354	0	Pdlim3	EC1	Two-sided Wilcoxon test	0.25	25
1.59666e-306	1.84736	0.84	0.228	3.7156e-302	Twist1	EC1	Two-sided Wilcoxon test	0.25	25
2.85202e-273	1.78765	0.604	0.079	6.63693e-269	Robo2	EC1	Two-sided Wilcoxon test	0.25	25
0	1.65444	0.723	0.081	0	2610035D17Rik	EC1	Two-sided Wilcoxon test	0.25	25
6.0963e-174	1.62485	0.802	0.301	1.41867e-169	Gpc6	EC1	Two-sided Wilcoxon test	0.25	25
2.29555e-286	1.60843	0.778	0.152	5.34197e-282	Unc5c	EC1	Two-sided Wilcoxon test	0.25	25
1.40973e-305	1.52173	0.914	0.253	3.28058e-301	Tbx20	EC1	Two-sided Wilcoxon test	0.25	25
4.36264e-218	1.50386	0.95	0.647	1.01523e-213	Hapln1	EC1	Two-sided Wilcoxon test	0.25	25
2.38658e-191	1.46825	0.982	0.526	5.5538e-187	Dlc1	EC1	Two-sided Wilcoxon test	0.25	25
8.37989e-258	1.43829	0.937	0.383	1.95008e-253	Dpysl3	EC1	Two-sided Wilcoxon test	0.25	25
7.45786e-173	1.41784	0.986	0.646	1.73552e-168	Auts2	EC1	Two-sided Wilcoxon test	0.25	25
0	1.39295	0.682	0.087	0	Cthrc1	EC1	Two-sided Wilcoxon test	0.25	25
2.39904e-118	1.38563	0.996	0.989	5.58281e-114	Tmsb4x	EC1	Two-sided Wilcoxon test	0.25	25
2.60823e-250	1.34604	0.949	0.333	6.06961e-246	Limch1	EC1	Two-sided Wilcoxon test	0.25	25
1.52192e-141	1.34459	0.947	0.795	3.54166e-137	Tagln2	EC1	Two-sided Wilcoxon test	0.25	25
1.33797e-207	1.25934	0.931	0.397	3.11359e-203	Fbn2	EC1	Two-sided Wilcoxon test	0.25	25
7.44543e-205	1.22403	0.987	0.556	1.73263e-200	Meis2	EC1	Two-sided Wilcoxon test	0.25	25
4.96737e-188	1.2219	0.936	0.396	1.15596e-183	Ltbp1	EC1	Two-sided Wilcoxon test	0.25	25
1.04251e-248	1.19734	0.763	0.191	2.42602e-244	Serpine2	EC1	Two-sided Wilcoxon test	0.25	25
7.50636e-221	1.18938	0.803	0.239	1.74681e-216	Sipa1l1	EC1	Two-sided Wilcoxon test	0.25	25
0	1.16383	0.702	0.07	0	Bmper	EC1	Two-sided Wilcoxon test	0.25	25
0	1.15524	0.763	0.096	0	Igfbp7	EC1	Two-sided Wilcoxon test	0.25	25
1.70379e-128	1.15253	0.936	0.741	3.96488e-124	Lgals1	EC1	Two-sided Wilcoxon test	0.25	25
1.62661e-150	1.1373	0.942	0.502	3.78528e-146	Map1b	EC1	Two-sided Wilcoxon test	0.25	25
2.3217e-274	1.10888	0.464	0.028	5.40282e-270	Epha3	EC1	Two-sided Wilcoxon test	0.25	25
2.65963e-296	1.10828	0.662	0.086	6.18923e-292	Sox9	EC1	Two-sided Wilcoxon test	0.25	25
1.2985e-211	1.08433	0.482	0.06	3.02174e-207	Gm35533	EC1	Two-sided Wilcoxon test	0.25	25
5.07723e-214	1.08213	0.873	0.286	1.18152e-209	Bach2	EC1	Two-sided Wilcoxon test	0.25	25
0	1.06478	0.797	0.132	0	Fbln2	EC1	Two-sided Wilcoxon test	0.25	25
2.91817e-137	1.05776	0.974	0.554	6.79088e-133	Nfia	EC1	Two-sided Wilcoxon test	0.25	25
1.74127e-222	1.05315	0.911	0.335	4.05211e-218	Creb3l2	EC1	Two-sided Wilcoxon test	0.25	25
9.38364e-236	1.04519	0.491	0.052	2.18367e-231	Rtn1	EC1	Two-sided Wilcoxon test	0.25	25
8.22826e-137	1.04186	0.492	0.117	1.9148e-132	Aff3	EC1	Two-sided Wilcoxon test	0.25	25
9.89394e-166	1.03973	0.87	0.388	2.30242e-161	Igf1	EC1	Two-sided Wilcoxon test	0.25	25
1.72758e-110	1.01462	0.812	0.363	4.02026e-106	Fbxl7	EC1	Two-sided Wilcoxon test	0.25	25
0	1.00891	0.619	0.058	0	Garnl3	EC1	Two-sided Wilcoxon test	0.25	25
1.06781e-171	0.985974	0.907	0.433	2.4849e-167	Rcn3	EC1	Two-sided Wilcoxon test	0.25	25
8.02323e-108	0.980274	0.855	0.515	1.86709e-103	S100a10	EC1	Two-sided Wilcoxon test	0.25	25
7.20361e-98	0.97786	0.514	0.16	1.67635e-93	Erbb4	EC1	Two-sided Wilcoxon test	0.25	25
1.98654e-82	0.961033	0.91	0.612	4.62287e-78	Id2	EC1	Two-sided Wilcoxon test	0.25	25
3.15076e-145	0.960754	0.887	0.382	7.33213e-141	Edil3	EC1	Two-sided Wilcoxon test	0.25	25
6.15259e-152	0.959295	0.912	0.449	1.43177e-147	Sox4	EC1	Two-sided Wilcoxon test	0.25	25
2.06084e-168	0.954918	0.645	0.169	4.79578e-164	P3h2	EC1	Two-sided Wilcoxon test	0.25	25
1.07285e-134	0.94492	0.942	0.554	2.49662e-130	Hmga2	EC1	Two-sided Wilcoxon test	0.25	25
1.8406e-130	0.942491	0.932	0.458	4.28326e-126	Rbms3	EC1	Two-sided Wilcoxon test	0.25	25
1.56751e-149	0.935326	0.927	0.431	3.64775e-145	Farp1	EC1	Two-sided Wilcoxon test	0.25	25
1.25342e-135	0.934525	0.823	0.374	2.91684e-131	Lmo4	EC1	Two-sided Wilcoxon test	0.25	25
1.19307e-200	0.925991	0.402	0.037	2.7764e-196	Clstn2	EC1	Two-sided Wilcoxon test	0.25	25
3.31624e-138	0.922885	0.556	0.139	7.71723e-134	Ctnna3	EC1	Two-sided Wilcoxon test	0.25	25
7.39876e-104	0.917984	0.778	0.347	1.72177e-99	Gpc3	EC1	Two-sided Wilcoxon test	0.25	25
0	0.915717	0.625	0.06	0	Thbs1	EC1	Two-sided Wilcoxon test	0.25	25
4.57915e-115	0.913044	0.961	0.747	1.06561e-110	Sparc	EC1	Two-sided Wilcoxon test	0.25	25
3.78987e-127	0.91154	0.723	0.257	8.81941e-123	Pde7b	EC1	Two-sided Wilcoxon test	0.25	25
5.30317e-132	0.90496	0.939	0.473	1.2341e-127	Mbnl2	EC1	Two-sided Wilcoxon test	0.25	25
3.36217e-175	0.899974	0.758	0.232	7.82412e-171	Syne1	EC1	Two-sided Wilcoxon test	0.25	25
2.82341e-158	0.896351	0.692	0.204	6.57036e-154	Pcsk5	EC1	Two-sided Wilcoxon test	0.25	25
2.24649e-217	0.895463	0.791	0.212	5.22782e-213	Mpped2	EC1	Two-sided Wilcoxon test	0.25	25
0	0.869938	0.673	0.079	0	Has2	EC1	Two-sided Wilcoxon test	0.25	25
8.09108e-144	0.868172	0.9	0.402	1.88287e-139	Enah	EC1	Two-sided Wilcoxon test	0.25	25
2.85142e-273	0.867228	0.682	0.109	6.63554e-269	Itgb5	EC1	Two-sided Wilcoxon test	0.25	25
1.47885e-136	0.865293	0.782	0.294	3.44143e-132	Plxna4	EC1	Two-sided Wilcoxon test	0.25	25
2.80479e-156	0.861418	0.788	0.267	6.52703e-152	Robo1	EC1	Two-sided Wilcoxon test	0.25	25
2.42676e-151	0.860471	0.991	0.711	5.64731e-147	Itgb1	EC1	Two-sided Wilcoxon test	0.25	25
4.78428e-159	0.857494	0.831	0.313	1.11335e-154	Specc1	EC1	Two-sided Wilcoxon test	0.25	25
2.11086e-281	0.84546	0.603	0.071	4.91218e-277	Plce1	EC1	Two-sided Wilcoxon test	0.25	25
3.44376e-96	0.84162	1	0.998	8.01397e-92	Malat1	EC1	Two-sided Wilcoxon test	0.25	25
1.68987e-147	0.840227	0.897	0.388	3.9325e-143	Gata4	EC1	Two-sided Wilcoxon test	0.25	25
6.10845e-102	0.832435	0.947	0.542	1.4215e-97	Prkg1	EC1	Two-sided Wilcoxon test	0.25	25
1.07882e-186	0.828112	0.751	0.21	2.51051e-182	Kitl	EC1	Two-sided Wilcoxon test	0.25	25
1.5818e-57	0.818318	0.921	0.698	3.68102e-53	Dbi	EC1	Two-sided Wilcoxon test	0.25	25
7.98438e-100	0.814209	0.977	0.581	1.85805e-95	Nfib	EC1	Two-sided Wilcoxon test	0.25	25
4.09207e-121	0.808126	0.871	0.39	9.52266e-117	Hecw2	EC1	Two-sided Wilcoxon test	0.25	25
1.38678e-250	0.805659	0.442	0.029	3.22718e-246	Gm11149	EC1	Two-sided Wilcoxon test	0.25	25
1.4519e-190	0.800724	0.712	0.188	3.37871e-186	Gm4258	EC1	Two-sided Wilcoxon test	0.25	25
1.53199e-87	0.799591	0.939	0.548	3.5651e-83	Meg3	EC1	Two-sided Wilcoxon test	0.25	25
1.77634e-161	0.798379	0.872	0.325	4.13372e-157	Cdk14	EC1	Two-sided Wilcoxon test	0.25	25
7.65612e-104	0.798251	0.487	0.138	1.78165e-99	Cdh13	EC1	Two-sided Wilcoxon test	0.25	25
1.35173e-97	0.797851	0.764	0.349	3.14561e-93	Klf4	EC1	Two-sided Wilcoxon test	0.25	25
8.51258e-89	0.797844	0.961	0.829	1.98096e-84	Tuba1a	EC1	Two-sided Wilcoxon test	0.25	25
2.06717e-218	0.796386	0.802	0.219	4.81051e-214	Loxl2	EC1	Two-sided Wilcoxon test	0.25	25
5.22162e-176	0.793576	0.654	0.179	1.21512e-171	Rnd2	EC1	Two-sided Wilcoxon test	0.25	25
0	0.789724	0.51	0.019	0	Pde1a	EC1	Two-sided Wilcoxon test	0.25	25
4.97367e-166	0.788207	0.836	0.302	1.15742e-161	Flnb	EC1	Two-sided Wilcoxon test	0.25	25
1.84673e-108	0.786052	0.96	0.505	4.29752e-104	Creb5	EC1	Two-sided Wilcoxon test	0.25	25
2.49236e-190	0.771975	0.551	0.095	5.79996e-186	Tubb3	EC1	Two-sided Wilcoxon test	0.25	25
2.81984e-97	0.767829	0.868	0.54	6.56206e-93	Rhoc	EC1	Two-sided Wilcoxon test	0.25	25
2.95102e-157	0.766257	0.729	0.227	6.86733e-153	Ldlrad4	EC1	Two-sided Wilcoxon test	0.25	25
8.98476e-113	0.763296	0.855	0.381	2.09084e-108	Zbtb20	EC1	Two-sided Wilcoxon test	0.25	25
1.38475e-264	0.757792	0.563	0.064	3.22246e-260	Cdon	EC1	Two-sided Wilcoxon test	0.25	25
2.71845e-284	0.748627	0.559	0.053	6.32611e-280	Pdgfra	EC1	Two-sided Wilcoxon test	0.25	25
4.00572e-121	0.748276	0.971	0.602	9.32172e-117	Gsk3b	EC1	Two-sided Wilcoxon test	0.25	25
3.96783e-107	0.747277	0.989	0.667	9.23353e-103	Rrbp1	EC1	Two-sided Wilcoxon test	0.25	25
4.84644e-163	0.742177	0.838	0.307	1.12781e-158	Rai14	EC1	Two-sided Wilcoxon test	0.25	25
6.77127e-104	0.741872	0.952	0.513	1.57574e-99	Rere	EC1	Two-sided Wilcoxon test	0.25	25
5.65674e-108	0.739307	0.905	0.454	1.31638e-103	Lhfp	EC1	Two-sided Wilcoxon test	0.25	25
4.60089e-92	0.738925	0.893	0.598	1.07067e-87	Cd63	EC1	Two-sided Wilcoxon test	0.25	25
8.21198e-146	0.73442	0.878	0.363	1.91101e-141	Lrrc58	EC1	Two-sided Wilcoxon test	0.25	25
1.4578e-203	0.734227	0.703	0.157	3.39244e-199	Samd4	EC1	Two-sided Wilcoxon test	0.25	25
5.90755e-55	0.731397	0.833	0.513	1.37475e-50	Crip1	EC1	Two-sided Wilcoxon test	0.25	25
1.76093e-49	0.73025	0.826	0.52	4.09785e-45	Atf3	EC1	Two-sided Wilcoxon test	0.25	25
1.23808e-112	0.725874	0.882	0.418	2.88114e-108	Myh10	EC1	Two-sided Wilcoxon test	0.25	25
2.05881e-122	0.720564	0.868	0.392	4.79105e-118	Smad7	EC1	Two-sided Wilcoxon test	0.25	25
1.35278e-198	0.719086	0.594	0.113	3.14806e-194	Epb41l3	EC1	Two-sided Wilcoxon test	0.25	25
3.44873e-130	0.71696	0.891	0.4	8.02554e-126	Ppfibp1	EC1	Two-sided Wilcoxon test	0.25	25
1.23154e-123	0.716328	0.945	0.45	2.86591e-119	Fndc3b	EC1	Two-sided Wilcoxon test	0.25	25
6.08841e-131	0.715888	0.863	0.364	1.41683e-126	Dock7	EC1	Two-sided Wilcoxon test	0.25	25
3.82011e-136	0.715106	0.823	0.315	8.88978e-132	Mast2	EC1	Two-sided Wilcoxon test	0.25	25
1.85056e-118	0.709023	0.888	0.422	4.30644e-114	Gata6	EC1	Two-sided Wilcoxon test	0.25	25
1.57849e-126	0.7079	0.891	0.414	3.67331e-122	Ckap4	EC1	Two-sided Wilcoxon test	0.25	25
2.32051e-98	0.706264	0.866	0.414	5.40006e-94	C430049B03Rik	EC1	Two-sided Wilcoxon test	0.25	25
4.85938e-140	0.705454	0.506	0.118	1.13083e-135	S100a6	EC1	Two-sided Wilcoxon test	0.25	25
5.67599e-85	0.699218	0.959	0.558	1.32086e-80	Maml2	EC1	Two-sided Wilcoxon test	0.25	25
6.76044e-159	0.698746	0.808	0.286	1.57322e-154	Lmna	EC1	Two-sided Wilcoxon test	0.25	25
2.5712e-97	0.697261	0.975	0.562	5.98343e-93	Tut4	EC1	Two-sided Wilcoxon test	0.25	25
7.21613e-126	0.692119	0.759	0.277	1.67927e-121	Ptprd	EC1	Two-sided Wilcoxon test	0.25	25
1.81148e-162	0.690162	0.838	0.281	4.21549e-158	Dst	EC1	Two-sided Wilcoxon test	0.25	25
7.12173e-125	0.68893	0.846	0.351	1.6573e-120	Mical2	EC1	Two-sided Wilcoxon test	0.25	25
2.66329e-160	0.684992	0.495	0.09	6.19774e-156	Pde3a	EC1	Two-sided Wilcoxon test	0.25	25
2.75736e-167	0.684812	0.709	0.214	6.41666e-163	Ddah1	EC1	Two-sided Wilcoxon test	0.25	25
4.68176e-98	0.684693	0.984	0.697	1.08949e-93	Grb10	EC1	Two-sided Wilcoxon test	0.25	25
8.34392e-74	0.684423	0.967	0.856	1.94171e-69	Jund	EC1	Two-sided Wilcoxon test	0.25	25
1.90001e-101	0.683047	0.861	0.437	4.42151e-97	Pdlim1	EC1	Two-sided Wilcoxon test	0.25	25
1.53375e-114	0.682906	0.925	0.433	3.56918e-110	Igf1r	EC1	Two-sided Wilcoxon test	0.25	25
3.56775e-138	0.681654	0.81	0.333	8.30251e-134	Zyx	EC1	Two-sided Wilcoxon test	0.25	25
1.28154e-97	0.678071	0.934	0.504	2.98227e-93	Eml4	EC1	Two-sided Wilcoxon test	0.25	25
1.78298e-118	0.678049	0.69	0.246	4.14918e-114	Timp3	EC1	Two-sided Wilcoxon test	0.25	25
2.43703e-73	0.677564	0.911	0.562	5.67121e-69	Anxa2	EC1	Two-sided Wilcoxon test	0.25	25
2.08822e-96	0.676384	0.898	0.461	4.85949e-92	Tanc2	EC1	Two-sided Wilcoxon test	0.25	25
8.3945e-108	0.673982	0.976	0.633	1.95348e-103	Rtn4	EC1	Two-sided Wilcoxon test	0.25	25
1.3996e-148	0.673278	0.81	0.295	3.257e-144	Aopep	EC1	Two-sided Wilcoxon test	0.25	25
8.04699e-119	0.671474	0.857	0.385	1.87262e-114	Arhgap5	EC1	Two-sided Wilcoxon test	0.25	25
3.66129e-142	0.671373	0.82	0.306	8.52019e-138	Arid5b	EC1	Two-sided Wilcoxon test	0.25	25
7.87261e-141	0.670764	0.803	0.3	1.83204e-136	Gulp1	EC1	Two-sided Wilcoxon test	0.25	25
1.76662e-105	0.670618	0.935	0.461	4.1111e-101	Tnrc6a	EC1	Two-sided Wilcoxon test	0.25	25
7.90728e-95	0.667914	0.961	0.54	1.8401e-90	Msi2	EC1	Two-sided Wilcoxon test	0.25	25
1.04063e-289	0.667737	0.476	0.026	2.42164e-285	Col9a3	EC1	Two-sided Wilcoxon test	0.25	25
3.39165e-226	0.666147	0.516	0.065	7.89271e-222	Pknox2	EC1	Two-sided Wilcoxon test	0.25	25
1.43229e-226	0.662724	0.535	0.066	3.33309e-222	Tnc	EC1	Two-sided Wilcoxon test	0.25	25
1.44876e-72	0.661233	0.944	0.539	3.3714e-68	Mir99ahg	EC1	Two-sided Wilcoxon test	0.25	25
4.05141e-74	0.660005	0.906	0.578	9.42804e-70	Itm2b	EC1	Two-sided Wilcoxon test	0.25	25
3.2989e-60	0.658443	0.774	0.414	7.67687e-56	Arhgap6	EC1	Two-sided Wilcoxon test	0.25	25
1.48954e-95	0.657331	0.96	0.584	3.46631e-91	Ttc3	EC1	Two-sided Wilcoxon test	0.25	25
8.63616e-152	0.655434	0.806	0.301	2.00972e-147	Fbln1	EC1	Two-sided Wilcoxon test	0.25	25
1.36754e-102	0.65529	0.865	0.406	3.18241e-98	Nrip1	EC1	Two-sided Wilcoxon test	0.25	25
3.92641e-113	0.653572	0.741	0.291	9.13715e-109	Pkp4	EC1	Two-sided Wilcoxon test	0.25	25
6.15698e-147	0.652202	0.777	0.274	1.43279e-142	Ugdh	EC1	Two-sided Wilcoxon test	0.25	25
5.60064e-86	0.647951	0.86	0.433	1.30333e-81	Zeb2	EC1	Two-sided Wilcoxon test	0.25	25
3.94664e-89	0.646307	0.904	0.503	9.18422e-85	Fstl1	EC1	Two-sided Wilcoxon test	0.25	25
2.83041e-90	0.645262	0.98	0.635	6.58665e-86	Sptbn1	EC1	Two-sided Wilcoxon test	0.25	25
2.11394e-131	0.640487	0.812	0.32	4.91934e-127	Tanc1	EC1	Two-sided Wilcoxon test	0.25	25
1.56528e-90	0.638675	0.94	0.496	3.64257e-86	Slc38a2	EC1	Two-sided Wilcoxon test	0.25	25
4.47697e-130	0.638072	0.604	0.169	1.04183e-125	Tenm3	EC1	Two-sided Wilcoxon test	0.25	25
2.88196e-72	0.637619	0.801	0.439	6.70662e-68	Ccnd1	EC1	Two-sided Wilcoxon test	0.25	25
1.02766e-50	0.636945	0.578	0.276	2.39146e-46	Esrrg	EC1	Two-sided Wilcoxon test	0.25	25
2.27083e-92	0.6366	0.979	0.602	5.28444e-88	Tcf12	EC1	Two-sided Wilcoxon test	0.25	25
2.00119e-114	0.63536	0.866	0.385	4.65697e-110	Zfp704	EC1	Two-sided Wilcoxon test	0.25	25
4.37131e-138	0.634631	0.614	0.167	1.01725e-133	Foxp2	EC1	Two-sided Wilcoxon test	0.25	25
6.39432e-123	0.633909	0.51	0.134	1.48802e-118	Stard13	EC1	Two-sided Wilcoxon test	0.25	25
1.60703e-87	0.631249	0.662	0.267	3.73971e-83	Setbp1	EC1	Two-sided Wilcoxon test	0.25	25
4.41121e-108	0.62883	0.883	0.396	1.02653e-103	Bmpr1a	EC1	Two-sided Wilcoxon test	0.25	25
3.70186e-90	0.628278	0.672	0.272	8.61461e-86	Psd3	EC1	Two-sided Wilcoxon test	0.25	25
2.89702e-108	0.627522	0.808	0.343	6.74167e-104	Frmd4a	EC1	Two-sided Wilcoxon test	0.25	25
2.15588e-128	0.627118	0.595	0.17	5.01694e-124	Pdzrn3	EC1	Two-sided Wilcoxon test	0.25	25
1.06953e-74	0.626514	0.936	0.569	2.48891e-70	Peg3	EC1	Two-sided Wilcoxon test	0.25	25
4.5684e-157	0.62555	0.768	0.27	1.06311e-152	Papss1	EC1	Two-sided Wilcoxon test	0.25	25
2.72726e-185	0.623601	0.565	0.108	6.34662e-181	Chst11	EC1	Two-sided Wilcoxon test	0.25	25
4.49027e-66	0.621723	0.887	0.537	1.04493e-61	Klf6	EC1	Two-sided Wilcoxon test	0.25	25
2.42354e-125	0.619671	0.811	0.314	5.63983e-121	Gli3	EC1	Two-sided Wilcoxon test	0.25	25
3.26147e-77	0.618561	0.921	0.532	7.58977e-73	Adk	EC1	Two-sided Wilcoxon test	0.25	25
1.62109e-73	0.616057	0.856	0.506	3.77243e-69	S100a11	EC1	Two-sided Wilcoxon test	0.25	25
2.46364e-114	0.610154	0.501	0.138	5.73313e-110	Postn	EC1	Two-sided Wilcoxon test	0.25	25
2.38683e-214	0.609229	0.531	0.079	5.55439e-210	Akr1b8	EC1	Two-sided Wilcoxon test	0.25	25
1.2031e-111	0.607336	0.6	0.185	2.79973e-107	Cdh2	EC1	Two-sided Wilcoxon test	0.25	25
7.68338e-146	0.606593	0.741	0.253	1.788e-141	Rhou	EC1	Two-sided Wilcoxon test	0.25	25
6.60328e-116	0.605355	0.872	0.378	1.53665e-111	Map4	EC1	Two-sided Wilcoxon test	0.25	25
1.15801e-143	0.603572	0.593	0.153	2.6948e-139	Adamts6	EC1	Two-sided Wilcoxon test	0.25	25
2.44116e-74	0.603125	0.964	0.585	5.68083e-70	Nktr	EC1	Two-sided Wilcoxon test	0.25	25
8.05231e-175	0.602225	0.385	0.043	1.87385e-170	Papss2	EC1	Two-sided Wilcoxon test	0.25	25
2.00678e-101	0.599935	0.752	0.312	4.66998e-97	Colec12	EC1	Two-sided Wilcoxon test	0.25	25
6.94511e-10	0.597094	0.972	0.925	1.6162e-05	Fabp5	EC1	Two-sided Wilcoxon test	0.25	25
8.26913e-154	0.595687	0.608	0.153	1.92431e-149	Slc1a3	EC1	Two-sided Wilcoxon test	0.25	25
7.60665e-149	0.593914	0.693	0.212	1.77014e-144	Bambi	EC1	Two-sided Wilcoxon test	0.25	25
4.30866e-87	0.592133	0.932	0.495	1.00267e-82	Mecom	EC1	Two-sided Wilcoxon test	0.25	25
2.44172e-89	0.591776	0.91	0.513	5.68214e-85	Cnn3	EC1	Two-sided Wilcoxon test	0.25	25
7.84859e-81	0.588427	0.897	0.519	1.82645e-76	Chd4	EC1	Two-sided Wilcoxon test	0.25	25
3.05903e-12	0.588055	0.9	0.833	7.11867e-08	Klf2	EC1	Two-sided Wilcoxon test	0.25	25
3.24082e-91	0.587018	0.916	0.46	7.5417e-87	Zfp292	EC1	Two-sided Wilcoxon test	0.25	25
1.25311e-79	0.586309	0.515	0.183	2.91612e-75	Sdk1	EC1	Two-sided Wilcoxon test	0.25	25
3.04536e-141	0.584307	0.835	0.331	7.08686e-137	Fam3c	EC1	Two-sided Wilcoxon test	0.25	25
1.31724e-163	0.582119	0.598	0.145	3.06536e-159	Serpinf1	EC1	Two-sided Wilcoxon test	0.25	25
5.40515e-106	0.581571	0.813	0.344	1.25783e-101	Sec24d	EC1	Two-sided Wilcoxon test	0.25	25
2.70128e-170	0.579967	0.682	0.186	6.28614e-166	Rnf130	EC1	Two-sided Wilcoxon test	0.25	25
4.12811e-269	0.579219	0.489	0.037	9.60652e-265	Gpc1	EC1	Two-sided Wilcoxon test	0.25	25
8.21328e-89	0.579167	0.911	0.454	1.91131e-84	Rbfox2	EC1	Two-sided Wilcoxon test	0.25	25
9.05219e-76	0.577088	0.898	0.495	2.10653e-71	Kcnq5	EC1	Two-sided Wilcoxon test	0.25	25
6.67439e-141	0.576764	0.736	0.255	1.5532e-136	Ptgis	EC1	Two-sided Wilcoxon test	0.25	25
6.01625e-142	0.575944	0.683	0.21	1.40004e-137	Sh3rf1	EC1	Two-sided Wilcoxon test	0.25	25
1.06561e-198	0.574866	0.497	0.071	2.47977e-194	Lef1	EC1	Two-sided Wilcoxon test	0.25	25
7.58476e-153	0.571528	0.494	0.097	1.76505e-148	Itga4	EC1	Two-sided Wilcoxon test	0.25	25
2.87622e-134	0.571387	0.741	0.249	6.69325e-130	Tgfb2	EC1	Two-sided Wilcoxon test	0.25	25
5.10522e-102	0.570332	0.904	0.428	1.18804e-97	Glg1	EC1	Two-sided Wilcoxon test	0.25	25
1.1404e-117	0.569579	0.868	0.378	2.65382e-113	Prrc1	EC1	Two-sided Wilcoxon test	0.25	25
6.60088e-71	0.569123	0.904	0.555	1.53609e-66	Anxa5	EC1	Two-sided Wilcoxon test	0.25	25
1.0531e-103	0.568392	0.823	0.367	2.45068e-99	Phldb2	EC1	Two-sided Wilcoxon test	0.25	25
5.64611e-99	0.566956	0.848	0.402	1.31391e-94	Soat1	EC1	Two-sided Wilcoxon test	0.25	25
9.02446e-92	0.566702	0.837	0.405	2.10008e-87	Klf3	EC1	Two-sided Wilcoxon test	0.25	25
2.42153e-80	0.563737	0.98	0.785	5.63514e-76	Nedd4	EC1	Two-sided Wilcoxon test	0.25	25
5.44586e-107	0.562855	0.803	0.342	1.26731e-102	Fgfr2	EC1	Two-sided Wilcoxon test	0.25	25
1.10337e-113	0.561098	0.777	0.324	2.56766e-109	Mfap2	EC1	Two-sided Wilcoxon test	0.25	25
2.02655e-111	0.560092	0.524	0.147	4.71598e-107	Gm35188	EC1	Two-sided Wilcoxon test	0.25	25
3.19627e-125	0.560079	0.702	0.238	7.43805e-121	Filip1	EC1	Two-sided Wilcoxon test	0.25	25
4.84618e-96	0.556775	0.846	0.383	1.12776e-91	Slc4a7	EC1	Two-sided Wilcoxon test	0.25	25
7.82011e-85	0.555536	0.818	0.385	1.81982e-80	Camk2d	EC1	Two-sided Wilcoxon test	0.25	25
1.23973e-141	0.554577	0.64	0.18	2.88498e-137	Ank2	EC1	Two-sided Wilcoxon test	0.25	25
5.40807e-145	0.553836	0.677	0.195	1.25851e-140	Trps1	EC1	Two-sided Wilcoxon test	0.25	25
1.5768e-89	0.553525	0.902	0.448	3.66937e-85	Ccny	EC1	Two-sided Wilcoxon test	0.25	25
5.59777e-52	0.553145	0.911	0.688	1.30266e-47	Id3	EC1	Two-sided Wilcoxon test	0.25	25
8.75185e-67	0.551438	0.427	0.147	2.03664e-62	Plcb1	EC1	Two-sided Wilcoxon test	0.25	25
2.8349e-73	0.549377	0.996	0.98	6.5971e-69	H3f3b	EC1	Two-sided Wilcoxon test	0.25	25
9.64934e-121	0.548859	0.821	0.331	2.2455e-116	Flna	EC1	Two-sided Wilcoxon test	0.25	25
1.64635e-119	0.548326	0.663	0.231	3.83123e-115	Emp3	EC1	Two-sided Wilcoxon test	0.25	25
5.32406e-85	0.546898	0.802	0.362	1.23896e-80	Large1	EC1	Two-sided Wilcoxon test	0.25	25
8.26182e-75	0.546745	0.971	0.567	1.92261e-70	Foxn3	EC1	Two-sided Wilcoxon test	0.25	25
7.96289e-92	0.546364	0.863	0.44	1.85304e-87	Fip1l1	EC1	Two-sided Wilcoxon test	0.25	25
6.40925e-87	0.546216	0.888	0.456	1.4915e-82	Acbd3	EC1	Two-sided Wilcoxon test	0.25	25
1.12966e-96	0.546001	0.837	0.383	2.62883e-92	Kdm5b	EC1	Two-sided Wilcoxon test	0.25	25
4.32974e-139	0.545108	0.484	0.106	1.00757e-134	Msx1	EC1	Two-sided Wilcoxon test	0.25	25
9.25893e-82	0.544044	0.986	0.698	2.15464e-77	Rab2a	EC1	Two-sided Wilcoxon test	0.25	25
1.78224e-168	0.542522	0.614	0.143	4.14746e-164	Fzd2	EC1	Two-sided Wilcoxon test	0.25	25
4.11125e-63	0.540837	0.926	0.703	9.56729e-59	Myl12a	EC1	Two-sided Wilcoxon test	0.25	25
5.0638e-73	0.540803	0.976	0.634	1.1784e-68	Rbms1	EC1	Two-sided Wilcoxon test	0.25	25
2.16953e-68	0.539985	0.677	0.31	5.04872e-64	Rian	EC1	Two-sided Wilcoxon test	0.25	25
7.1765e-122	0.539893	0.783	0.309	1.67004e-117	Golim4	EC1	Two-sided Wilcoxon test	0.25	25
2.81217e-89	0.539339	0.877	0.419	6.5442e-85	Chd6	EC1	Two-sided Wilcoxon test	0.25	25
5.00698e-72	0.538454	0.952	0.545	1.16517e-67	Lpp	EC1	Two-sided Wilcoxon test	0.25	25
1.4173e-78	0.538093	0.929	0.499	3.29819e-74	Zfp644	EC1	Two-sided Wilcoxon test	0.25	25
1.43717e-132	0.537228	0.756	0.274	3.34444e-128	Dennd2a	EC1	Two-sided Wilcoxon test	0.25	25
2.70453e-118	0.537077	0.62	0.193	6.29372e-114	Ccn1	EC1	Two-sided Wilcoxon test	0.25	25
6.04772e-55	0.536136	0.907	0.73	1.40736e-50	Fkbp1a	EC1	Two-sided Wilcoxon test	0.25	25
1.85877e-114	0.534637	0.708	0.257	4.32555e-110	Heatr5a	EC1	Two-sided Wilcoxon test	0.25	25
2.37466e-133	0.534617	0.747	0.266	5.52607e-129	Cttnbp2nl	EC1	Two-sided Wilcoxon test	0.25	25
2.52923e-76	0.533915	0.911	0.527	5.88577e-72	Smarcc1	EC1	Two-sided Wilcoxon test	0.25	25
1.72603e-22	0.531206	0.941	0.752	4.01665e-18	Apoe	EC1	Two-sided Wilcoxon test	0.25	25
6.16118e-90	0.529701	0.867	0.414	1.43377e-85	Usp47	EC1	Two-sided Wilcoxon test	0.25	25
1.03689e-128	0.529206	0.777	0.29	2.41294e-124	Zfp266	EC1	Two-sided Wilcoxon test	0.25	25
2.88739e-139	0.528679	0.534	0.129	6.71925e-135	Pappa	EC1	Two-sided Wilcoxon test	0.25	25
4.13689e-154	0.52621	0.67	0.183	9.62697e-150	Cblb	EC1	Two-sided Wilcoxon test	0.25	25
7.01287e-102	0.524454	0.825	0.367	1.63196e-97	Wwc2	EC1	Two-sided Wilcoxon test	0.25	25
4.42575e-44	0.523105	0.881	0.601	1.02992e-39	Id1	EC1	Two-sided Wilcoxon test	0.25	25
2.2109e-92	0.522316	0.757	0.328	5.14498e-88	Atp13a3	EC1	Two-sided Wilcoxon test	0.25	25
1.7927e-72	0.52045	0.917	0.497	4.17179e-68	Tnpo1	EC1	Two-sided Wilcoxon test	0.25	25
5.98478e-68	0.520211	0.927	0.623	1.39272e-63	Mtch1	EC1	Two-sided Wilcoxon test	0.25	25
2.51014e-106	0.520175	0.816	0.357	5.84134e-102	Txndc5	EC1	Two-sided Wilcoxon test	0.25	25
8.65293e-143	0.519058	0.625	0.179	2.01362e-138	St3gal4	EC1	Two-sided Wilcoxon test	0.25	25
1.25132e-76	0.519037	0.873	0.443	2.91196e-72	Arhgap28	EC1	Two-sided Wilcoxon test	0.25	25
6.36106e-110	0.518879	0.783	0.321	1.48028e-105	Rras2	EC1	Two-sided Wilcoxon test	0.25	25
1.80131e-91	0.518867	0.442	0.123	4.19184e-87	Kif26b	EC1	Two-sided Wilcoxon test	0.25	25
1.53013e-70	0.517975	0.92	0.511	3.56077e-66	App	EC1	Two-sided Wilcoxon test	0.25	25
2.30255e-119	0.516483	0.625	0.207	5.35826e-115	Nfic	EC1	Two-sided Wilcoxon test	0.25	25
3.76959e-113	0.515173	0.624	0.206	8.77221e-109	Ptprb	EC1	Two-sided Wilcoxon test	0.25	25
7.65711e-88	0.513316	0.893	0.442	1.78189e-83	Copa	EC1	Two-sided Wilcoxon test	0.25	25
9.55828e-91	0.512995	0.792	0.352	2.22431e-86	Klf7	EC1	Two-sided Wilcoxon test	0.25	25
4.11403e-76	0.512371	0.91	0.471	9.57376e-72	Usp3	EC1	Two-sided Wilcoxon test	0.25	25
1.8817e-85	0.512283	0.851	0.404	4.37891e-81	Arhgef12	EC1	Two-sided Wilcoxon test	0.25	25
4.24418e-84	0.512119	0.845	0.437	9.87664e-80	Csrp1	EC1	Two-sided Wilcoxon test	0.25	25
1.45442e-114	0.51209	0.788	0.315	3.38459e-110	Sec24b	EC1	Two-sided Wilcoxon test	0.25	25
1.59471e-67	0.509914	0.957	0.564	3.71104e-63	Senp6	EC1	Two-sided Wilcoxon test	0.25	25
2.35693e-94	0.50917	0.871	0.402	5.48481e-90	Wls	EC1	Two-sided Wilcoxon test	0.25	25
2.08022e-97	0.508853	0.842	0.378	4.84088e-93	Akt3	EC1	Two-sided Wilcoxon test	0.25	25
5.49634e-40	0.507892	0.996	0.989	1.27905e-35	Actg1	EC1	Two-sided Wilcoxon test	0.25	25
3.15561e-51	0.506888	0.895	0.628	7.34343e-47	H2afv	EC1	Two-sided Wilcoxon test	0.25	25
8.11308e-90	0.506004	0.822	0.371	1.88799e-85	Jarid2	EC1	Two-sided Wilcoxon test	0.25	25
7.89456e-146	0.505315	0.588	0.146	1.83714e-141	Ror2	EC1	Two-sided Wilcoxon test	0.25	25
3.43591e-108	0.505153	0.794	0.332	7.9957e-104	Tnfaip8	EC1	Two-sided Wilcoxon test	0.25	25
2.70612e-97	0.504957	0.435	0.115	6.29741e-93	Gm42439	EC1	Two-sided Wilcoxon test	0.25	25
2.84724e-67	0.504285	0.984	0.7	6.62582e-63	Rbm25	EC1	Two-sided Wilcoxon test	0.25	25
3.44134e-113	0.504173	0.752	0.288	8.00833e-109	Hdgfl3	EC1	Two-sided Wilcoxon test	0.25	25
1.07111e-88	0.502931	0.796	0.353	2.49257e-84	Crebrf	EC1	Two-sided Wilcoxon test	0.25	25
4.87304e-80	0.502746	0.625	0.258	1.13401e-75	Gse1	EC1	Two-sided Wilcoxon test	0.25	25
8.60209e-97	0.501474	0.753	0.311	2.00179e-92	Stxbp6	EC1	Two-sided Wilcoxon test	0.25	25
1.13007e-49	0.500755	0.875	0.597	2.62978e-45	Eid1	EC1	Two-sided Wilcoxon test	0.25	25
1.10517e-46	0.499569	0.853	0.544	2.57183e-42	Rhob	EC1	Two-sided Wilcoxon test	0.25	25
2.01595e-109	0.499298	0.708	0.268	4.69132e-105	Sesn3	EC1	Two-sided Wilcoxon test	0.25	25
2.3058e-83	0.498976	0.852	0.405	5.36582e-79	Braf	EC1	Two-sided Wilcoxon test	0.25	25
4.43673e-78	0.49808	0.924	0.477	1.03247e-73	Usp9x	EC1	Two-sided Wilcoxon test	0.25	25
8.19637e-112	0.493891	0.491	0.134	1.90738e-107	Bicc1	EC1	Two-sided Wilcoxon test	0.25	25
1.84312e-76	0.493539	0.882	0.439	4.28913e-72	Vcl	EC1	Two-sided Wilcoxon test	0.25	25
2.75142e-111	0.493526	0.771	0.305	6.40282e-107	Tulp4	EC1	Two-sided Wilcoxon test	0.25	25
1.48731e-67	0.49199	0.92	0.513	3.46112e-63	Pcm1	EC1	Two-sided Wilcoxon test	0.25	25
8.52496e-80	0.491815	0.773	0.353	1.98384e-75	Ube2e2	EC1	Two-sided Wilcoxon test	0.25	25
5.26952e-109	0.491764	0.706	0.268	1.22627e-104	Lrrfip1	EC1	Two-sided Wilcoxon test	0.25	25
1.36909e-137	0.491043	0.277	0.024	3.186e-133	Grid1	EC1	Two-sided Wilcoxon test	0.25	25
7.85284e-102	0.490818	0.856	0.382	1.82744e-97	Sec31a	EC1	Two-sided Wilcoxon test	0.25	25
2.50673e-70	0.490775	0.985	0.781	5.8334e-66	Srrm2	EC1	Two-sided Wilcoxon test	0.25	25
5.41089e-28	0.490531	0.994	0.983	1.25917e-23	Vim	EC1	Two-sided Wilcoxon test	0.25	25
7.57294e-73	0.490281	0.911	0.494	1.7623e-68	Calu	EC1	Two-sided Wilcoxon test	0.25	25
5.31202e-68	0.488312	0.932	0.543	1.23616e-63	Ube2b	EC1	Two-sided Wilcoxon test	0.25	25
1.33833e-79	0.488203	0.816	0.412	3.11443e-75	Pcbp4	EC1	Two-sided Wilcoxon test	0.25	25
9.84678e-135	0.486035	0.714	0.241	2.29145e-130	Gask1b	EC1	Two-sided Wilcoxon test	0.25	25
2.19692e-84	0.485969	0.826	0.382	5.11246e-80	Sgms1	EC1	Two-sided Wilcoxon test	0.25	25
9.81293e-62	0.485178	0.969	0.654	2.28357e-57	Pafah1b1	EC1	Two-sided Wilcoxon test	0.25	25
2.11953e-78	0.485069	0.793	0.4	4.93236e-74	Ptms	EC1	Two-sided Wilcoxon test	0.25	25
4.50061e-105	0.484133	0.828	0.355	1.04734e-100	Zmiz1	EC1	Two-sided Wilcoxon test	0.25	25
2.05647e-74	0.484073	0.883	0.474	4.78562e-70	Pnisr	EC1	Two-sided Wilcoxon test	0.25	25
1.24236e-89	0.484049	0.837	0.387	2.8911e-85	Rest	EC1	Two-sided Wilcoxon test	0.25	25
8.77841e-74	0.482517	0.944	0.527	2.04282e-69	Tcf4	EC1	Two-sided Wilcoxon test	0.25	25
4.71056e-62	0.482509	0.909	0.494	1.09619e-57	Ptprg	EC1	Two-sided Wilcoxon test	0.25	25
5.3761e-101	0.482457	0.464	0.125	1.25107e-96	Tox	EC1	Two-sided Wilcoxon test	0.25	25
3.49133e-159	0.481312	0.376	0.046	8.12468e-155	Eya4	EC1	Two-sided Wilcoxon test	0.25	25
3.9565e-101	0.480833	0.774	0.322	9.20718e-97	Trim35	EC1	Two-sided Wilcoxon test	0.25	25
1.97128e-67	0.479657	0.866	0.465	4.58736e-63	Tsc22d1	EC1	Two-sided Wilcoxon test	0.25	25
2.86138e-88	0.479571	0.58	0.206	6.65871e-84	Epha7	EC1	Two-sided Wilcoxon test	0.25	25
1.8754e-83	0.478826	0.754	0.337	4.36425e-79	Fryl	EC1	Two-sided Wilcoxon test	0.25	25
2.51178e-86	0.478733	0.858	0.398	5.84515e-82	Tmcc1	EC1	Two-sided Wilcoxon test	0.25	25
1.05521e-48	0.476992	0.966	0.683	2.45557e-44	Fn1	EC1	Two-sided Wilcoxon test	0.25	25
7.67747e-73	0.474955	0.877	0.458	1.78662e-68	Agfg1	EC1	Two-sided Wilcoxon test	0.25	25
2.31051e-182	0.472851	0.506	0.084	5.37679e-178	Ociad2	EC1	Two-sided Wilcoxon test	0.25	25
8.59237e-152	0.472447	0.578	0.145	1.99953e-147	Enc1	EC1	Two-sided Wilcoxon test	0.25	25
6.29944e-74	0.470702	0.823	0.398	1.46594e-69	Prkce	EC1	Two-sided Wilcoxon test	0.25	25
4.38539e-103	0.470597	0.807	0.338	1.02052e-98	Rb1cc1	EC1	Two-sided Wilcoxon test	0.25	25
6.28405e-190	0.470544	0.387	0.036	1.46236e-185	Irs1	EC1	Two-sided Wilcoxon test	0.25	25
8.87242e-75	0.46962	0.817	0.414	2.0647e-70	Selenos	EC1	Two-sided Wilcoxon test	0.25	25
1.18545e-74	0.469036	0.868	0.432	2.75865e-70	Rsf1	EC1	Two-sided Wilcoxon test	0.25	25
2.84959e-77	0.468465	0.738	0.321	6.63128e-73	Efna5	EC1	Two-sided Wilcoxon test	0.25	25
1.37959e-169	0.468353	0.419	0.056	3.21044e-165	Clmp	EC1	Two-sided Wilcoxon test	0.25	25
2.61452e-124	0.46829	0.599	0.177	6.08426e-120	Igsf3	EC1	Two-sided Wilcoxon test	0.25	25
3.00257e-188	0.468081	0.452	0.058	6.98727e-184	Antxr1	EC1	Two-sided Wilcoxon test	0.25	25
6.19979e-58	0.46663	0.932	0.594	1.44275e-53	Kif5b	EC1	Two-sided Wilcoxon test	0.25	25
1.49239e-79	0.466204	0.842	0.406	3.47293e-75	Trim24	EC1	Two-sided Wilcoxon test	0.25	25
4.84578e-75	0.466001	0.783	0.364	1.12766e-70	Dennd5b	EC1	Two-sided Wilcoxon test	0.25	25
1.15809e-56	0.46589	0.94	0.551	2.69499e-52	Kansl1	EC1	Two-sided Wilcoxon test	0.25	25
6.4783e-84	0.46588	0.526	0.18	1.50756e-79	Hs6st2	EC1	Two-sided Wilcoxon test	0.25	25
6.46923e-103	0.4655	0.733	0.298	1.50546e-98	Lima1	EC1	Two-sided Wilcoxon test	0.25	25
1.87614e-102	0.465495	0.741	0.297	4.36597e-98	Sec23a	EC1	Two-sided Wilcoxon test	0.25	25
7.68713e-154	0.465393	0.503	0.1	1.78887e-149	Pcolce	EC1	Two-sided Wilcoxon test	0.25	25
7.07816e-73	0.464574	0.895	0.459	1.64716e-68	Ptbp2	EC1	Two-sided Wilcoxon test	0.25	25
1.33592e-115	0.464438	0.625	0.199	3.10882e-111	Ahnak	EC1	Two-sided Wilcoxon test	0.25	25
5.02922e-89	0.463475	0.846	0.388	1.17035e-84	Kmt2e	EC1	Two-sided Wilcoxon test	0.25	25
2.68085e-130	0.463393	0.351	0.053	6.23862e-126	Tiam2	EC1	Two-sided Wilcoxon test	0.25	25
2.05008e-92	0.462844	0.771	0.332	4.77075e-88	Dab2ip	EC1	Two-sided Wilcoxon test	0.25	25
2.17257e-103	0.462244	0.802	0.333	5.05579e-99	Cdc42se2	EC1	Two-sided Wilcoxon test	0.25	25
9.56194e-81	0.461434	0.826	0.418	2.22516e-76	Pdlim7	EC1	Two-sided Wilcoxon test	0.25	25
5.51735e-81	0.460734	0.841	0.413	1.28394e-76	4931406P16Rik	EC1	Two-sided Wilcoxon test	0.25	25
3.68186e-57	0.460618	0.901	0.517	8.56807e-53	Tln1	EC1	Two-sided Wilcoxon test	0.25	25
1.3709e-136	0.460222	0.276	0.023	3.19023e-132	Unc13c	EC1	Two-sided Wilcoxon test	0.25	25
4.18643e-130	0.460171	0.556	0.149	9.74224e-126	Lats2	EC1	Two-sided Wilcoxon test	0.25	25
5.93849e-104	0.460132	0.677	0.255	1.38195e-99	Zfp652	EC1	Two-sided Wilcoxon test	0.25	25
4.30814e-81	0.459414	0.843	0.409	1.00255e-76	Ctnnd1	EC1	Two-sided Wilcoxon test	0.25	25
1.59761e-83	0.459365	0.756	0.331	3.71779e-79	Apbb2	EC1	Two-sided Wilcoxon test	0.25	25
2.51742e-110	0.458505	0.764	0.302	5.85829e-106	Zfp24	EC1	Two-sided Wilcoxon test	0.25	25
4.48929e-107	0.458231	0.683	0.25	1.0447e-102	Lama4	EC1	Two-sided Wilcoxon test	0.25	25
3.27886e-90	0.458045	0.732	0.311	7.63023e-86	Col5a2	EC1	Two-sided Wilcoxon test	0.25	25
3.4892e-71	0.457718	0.372	0.111	8.11972e-67	Nos1ap	EC1	Two-sided Wilcoxon test	0.25	25
5.19642e-83	0.457064	0.81	0.374	1.20926e-78	Golgb1	EC1	Two-sided Wilcoxon test	0.25	25
9.02474e-27	0.456744	0.92	0.652	2.10015e-22	Ctsl	EC1	Two-sided Wilcoxon test	0.25	25
2.79674e-82	0.456543	0.852	0.405	6.5083e-78	Ccdc88a	EC1	Two-sided Wilcoxon test	0.25	25
5.44576e-78	0.45651	0.895	0.444	1.26728e-73	Fam168b	EC1	Two-sided Wilcoxon test	0.25	25
8.73209e-80	0.456121	0.867	0.42	2.03204e-75	Sptan1	EC1	Two-sided Wilcoxon test	0.25	25
1.86813e-70	0.455409	0.888	0.467	4.34732e-66	Lamp2	EC1	Two-sided Wilcoxon test	0.25	25
3.35704e-89	0.454595	0.796	0.357	7.81216e-85	Pja2	EC1	Two-sided Wilcoxon test	0.25	25
5.3661e-119	0.4536	0.367	0.065	1.24874e-114	Bmp6	EC1	Two-sided Wilcoxon test	0.25	25
2.46492e-64	0.453269	0.895	0.489	5.73611e-60	B230219D22Rik	EC1	Two-sided Wilcoxon test	0.25	25
2.5109e-131	0.452747	0.608	0.173	5.84311e-127	Plat	EC1	Two-sided Wilcoxon test	0.25	25
4.64274e-35	0.452509	0.431	0.211	1.08041e-30	Edn1	EC1	Two-sided Wilcoxon test	0.25	25
1.95091e-88	0.452439	0.797	0.355	4.53996e-84	Tbl1xr1	EC1	Two-sided Wilcoxon test	0.25	25
2.95678e-108	0.450771	0.559	0.176	6.88072e-104	Sncaip	EC1	Two-sided Wilcoxon test	0.25	25
3.84233e-53	0.450658	0.93	0.61	8.94148e-49	Cbx5	EC1	Two-sided Wilcoxon test	0.25	25
1.27087e-57	0.450314	0.96	0.556	2.95745e-53	Map4k4	EC1	Two-sided Wilcoxon test	0.25	25
7.13973e-85	0.449764	0.821	0.373	1.66149e-80	Nav1	EC1	Two-sided Wilcoxon test	0.25	25
2.4706e-132	0.449115	0.565	0.143	5.74933e-128	Cacna2d1	EC1	Two-sided Wilcoxon test	0.25	25
5.79216e-67	0.448272	0.922	0.496	1.34789e-62	Gpatch8	EC1	Two-sided Wilcoxon test	0.25	25
3.62002e-60	0.448118	0.892	0.48	8.42416e-56	Tead1	EC1	Two-sided Wilcoxon test	0.25	25
1.28442e-91	0.446287	0.697	0.28	2.98898e-87	Sh3pxd2a	EC1	Two-sided Wilcoxon test	0.25	25
2.90945e-71	0.446192	0.861	0.453	6.77057e-67	Dpysl2	EC1	Two-sided Wilcoxon test	0.25	25
1.2991e-59	0.446122	0.901	0.487	3.02314e-55	Phf3	EC1	Two-sided Wilcoxon test	0.25	25
7.77386e-79	0.445692	0.702	0.303	1.80906e-74	Klf12	EC1	Two-sided Wilcoxon test	0.25	25
7.87815e-50	0.445001	0.96	0.675	1.83332e-45	Prrc2c	EC1	Two-sided Wilcoxon test	0.25	25
3.05603e-73	0.444752	0.891	0.446	7.11169e-69	Dip2b	EC1	Two-sided Wilcoxon test	0.25	25
7.94282e-126	0.443926	0.45	0.098	1.84837e-121	Nfatc2	EC1	Two-sided Wilcoxon test	0.25	25
2.20631e-92	0.443646	0.34	0.071	5.1343e-88	Nav2	EC1	Two-sided Wilcoxon test	0.25	25
6.52301e-131	0.442006	0.551	0.144	1.51797e-126	Gas1	EC1	Two-sided Wilcoxon test	0.25	25
1.68098e-65	0.441869	0.896	0.467	3.91182e-61	Setd5	EC1	Two-sided Wilcoxon test	0.25	25
8.04713e-80	0.441221	0.811	0.388	1.87265e-75	Smad2	EC1	Two-sided Wilcoxon test	0.25	25
7.32285e-80	0.44068	0.847	0.4	1.7041e-75	Kif1b	EC1	Two-sided Wilcoxon test	0.25	25
3.44162e-59	0.44059	0.945	0.541	8.00899e-55	Mef2a	EC1	Two-sided Wilcoxon test	0.25	25
1.08834e-56	0.439629	0.949	0.55	2.53267e-52	Usp34	EC1	Two-sided Wilcoxon test	0.25	25
7.20969e-46	0.439566	0.965	0.621	1.67777e-41	Son	EC1	Two-sided Wilcoxon test	0.25	25
2.73712e-51	0.439554	0.949	0.636	6.36955e-47	Fubp1	EC1	Two-sided Wilcoxon test	0.25	25
2.27132e-82	0.437888	0.687	0.284	5.28558e-78	Phlda1	EC1	Two-sided Wilcoxon test	0.25	25
4.61689e-107	0.437118	0.697	0.264	1.0744e-102	Glipr2	EC1	Two-sided Wilcoxon test	0.25	25
5.73563e-88	0.437043	0.747	0.314	1.33474e-83	Tgfbr1	EC1	Two-sided Wilcoxon test	0.25	25
1.6409e-109	0.437022	0.593	0.186	3.81855e-105	Plag1	EC1	Two-sided Wilcoxon test	0.25	25
4.05352e-54	0.436833	0.949	0.652	9.43294e-50	Sf3b2	EC1	Two-sided Wilcoxon test	0.25	25
3.72921e-77	0.436144	0.774	0.357	8.67824e-73	Dip2c	EC1	Two-sided Wilcoxon test	0.25	25
2.09178e-52	0.435827	0.902	0.592	4.86778e-48	Tmem167	EC1	Two-sided Wilcoxon test	0.25	25
3.82014e-56	0.435635	0.955	0.727	8.88985e-52	Sept7	EC1	Two-sided Wilcoxon test	0.25	25
7.34594e-55	0.435361	0.906	0.561	1.70947e-50	Atxn7l3b	EC1	Two-sided Wilcoxon test	0.25	25
2.10575e-114	0.435342	0.658	0.231	4.90029e-110	Serf1	EC1	Two-sided Wilcoxon test	0.25	25
7.98562e-65	0.435275	0.699	0.321	1.85833e-60	Pde1c	EC1	Two-sided Wilcoxon test	0.25	25
1.86439e-120	0.434536	0.638	0.2	4.33863e-116	St5	EC1	Two-sided Wilcoxon test	0.25	25
6.00567e-58	0.431929	0.997	0.84	1.39758e-53	Rbm39	EC1	Two-sided Wilcoxon test	0.25	25
3.2622e-60	0.431879	0.942	0.54	7.59148e-56	Aff4	EC1	Two-sided Wilcoxon test	0.25	25
5.54643e-71	0.431737	0.875	0.439	1.29071e-66	Ehmt1	EC1	Two-sided Wilcoxon test	0.25	25
4.83316e-67	0.430519	0.89	0.473	1.12473e-62	Tbl1x	EC1	Two-sided Wilcoxon test	0.25	25
7.05451e-50	0.430357	0.891	0.574	1.64166e-45	Maged1	EC1	Two-sided Wilcoxon test	0.25	25
3.06847e-171	0.4302	0.475	0.076	7.14065e-167	Tmcc3	EC1	Two-sided Wilcoxon test	0.25	25
9.11247e-94	0.430167	0.694	0.272	2.12056e-89	Clasp2	EC1	Two-sided Wilcoxon test	0.25	25
3.56538e-139	0.430086	0.503	0.108	8.297e-135	Tgfbi	EC1	Two-sided Wilcoxon test	0.25	25
1.65419e-142	0.429777	0.618	0.169	3.84947e-138	Timp2	EC1	Two-sided Wilcoxon test	0.25	25
9.95942e-56	0.429681	0.915	0.505	2.31766e-51	Rlim	EC1	Two-sided Wilcoxon test	0.25	25
3.24518e-68	0.429634	0.857	0.431	7.55186e-64	Fndc3a	EC1	Two-sided Wilcoxon test	0.25	25
3.54092e-85	0.428622	0.764	0.334	8.24007e-81	P4ha1	EC1	Two-sided Wilcoxon test	0.25	25
6.1594e-61	0.428182	0.862	0.459	1.43335e-56	P4hb	EC1	Two-sided Wilcoxon test	0.25	25
1.12993e-86	0.428053	0.787	0.357	2.62946e-82	Ap3s1	EC1	Two-sided Wilcoxon test	0.25	25
3.4081e-72	0.426956	0.593	0.245	7.93099e-68	Celf2	EC1	Two-sided Wilcoxon test	0.25	25
3.06328e-67	0.426394	0.776	0.368	7.12856e-63	Maml3	EC1	Two-sided Wilcoxon test	0.25	25
5.03756e-100	0.426354	0.603	0.21	1.17229e-95	Med14	EC1	Two-sided Wilcoxon test	0.25	25
6.39949e-140	0.42602	0.455	0.092	1.48923e-135	Hsd17b11	EC1	Two-sided Wilcoxon test	0.25	25
3.93536e-48	0.425376	0.868	0.545	9.15798e-44	Tbrg1	EC1	Two-sided Wilcoxon test	0.25	25
1.5389e-47	0.425195	0.974	0.718	3.58117e-43	Tpr	EC1	Two-sided Wilcoxon test	0.25	25
3.59049e-85	0.425061	0.843	0.378	8.35542e-81	Wdfy3	EC1	Two-sided Wilcoxon test	0.25	25
3.1179e-72	0.424647	0.534	0.204	7.25566e-68	Prickle2	EC1	Two-sided Wilcoxon test	0.25	25
6.58549e-127	0.424577	0.669	0.215	1.53251e-122	Ptprs	EC1	Two-sided Wilcoxon test	0.25	25
8.45667e-60	0.424296	0.861	0.476	1.96795e-55	Snx6	EC1	Two-sided Wilcoxon test	0.25	25
1.22483e-91	0.423366	0.764	0.33	2.8503e-87	Ctnnbip1	EC1	Two-sided Wilcoxon test	0.25	25
1.87521e-92	0.422917	0.733	0.303	4.3638e-88	Ubtd2	EC1	Two-sided Wilcoxon test	0.25	25
1.1329e-51	0.422689	0.99	0.714	2.63636e-47	Airn	EC1	Two-sided Wilcoxon test	0.25	25
2.80352e-87	0.420622	0.783	0.339	6.52408e-83	Klhl24	EC1	Two-sided Wilcoxon test	0.25	25
1.80646e-76	0.420594	0.843	0.402	4.20381e-72	Scaf8	EC1	Two-sided Wilcoxon test	0.25	25
4.54864e-47	0.420535	0.927	0.609	1.05851e-42	Khdrbs1	EC1	Two-sided Wilcoxon test	0.25	25
7.89228e-116	0.420284	0.643	0.213	1.83661e-111	Fam171a1	EC1	Two-sided Wilcoxon test	0.25	25
1.53767e-92	0.419834	0.736	0.298	3.57831e-88	Exoc6b	EC1	Two-sided Wilcoxon test	0.25	25
1.21469e-115	0.419704	0.629	0.207	2.82671e-111	Rnf217	EC1	Two-sided Wilcoxon test	0.25	25
1.21358e-165	0.419484	0.5	0.091	2.82412e-161	Me1	EC1	Two-sided Wilcoxon test	0.25	25
1.40508e-48	0.419451	0.967	0.823	3.26976e-44	Serpinh1	EC1	Two-sided Wilcoxon test	0.25	25
3.04317e-149	0.419085	0.566	0.136	7.08176e-145	5033428I22Rik	EC1	Two-sided Wilcoxon test	0.25	25
1.36779e-61	0.418975	0.866	0.481	3.18298e-57	Bnip2	EC1	Two-sided Wilcoxon test	0.25	25
2.94147e-66	0.418569	0.862	0.464	6.84511e-62	Rcn1	EC1	Two-sided Wilcoxon test	0.25	25
3.74974e-94	0.418149	0.807	0.349	8.72603e-90	Yipf5	EC1	Two-sided Wilcoxon test	0.25	25
1.56028e-158	0.418019	0.437	0.069	3.63092e-154	Prkcb	EC1	Two-sided Wilcoxon test	0.25	25
5.00531e-63	0.417918	0.868	0.46	1.16479e-58	Akap9	EC1	Two-sided Wilcoxon test	0.25	25
1.34988e-84	0.4177	0.707	0.295	3.14131e-80	Smad6	EC1	Two-sided Wilcoxon test	0.25	25
4.2488e-55	0.417142	0.856	0.508	9.88739e-51	Ptov1	EC1	Two-sided Wilcoxon test	0.25	25
9.72212e-168	0.417127	0.52	0.096	2.26243e-163	Arhgef40	EC1	Two-sided Wilcoxon test	0.25	25
8.54226e-109	0.416995	0.595	0.182	1.98787e-104	Sorbs2	EC1	Two-sided Wilcoxon test	0.25	25
1.67717e-86	0.415972	0.746	0.319	3.90295e-82	Zfp609	EC1	Two-sided Wilcoxon test	0.25	25
3.06863e-66	0.415056	0.632	0.275	7.14101e-62	Tmtc2	EC1	Two-sided Wilcoxon test	0.25	25
1.45572e-53	0.414832	0.589	0.272	3.38761e-49	Sat1	EC1	Two-sided Wilcoxon test	0.25	25
2.85912e-84	0.41481	0.813	0.368	6.65346e-80	Gjc1	EC1	Two-sided Wilcoxon test	0.25	25
2.44103e-88	0.413518	0.726	0.301	5.68053e-84	Mpdz	EC1	Two-sided Wilcoxon test	0.25	25
2.53657e-52	0.412118	0.935	0.553	5.90285e-48	Strn3	EC1	Two-sided Wilcoxon test	0.25	25
3.20893e-170	0.411316	0.51	0.091	7.4675e-166	Unc5b	EC1	Two-sided Wilcoxon test	0.25	25
4.06983e-76	0.41108	0.821	0.391	9.47089e-72	Epc1	EC1	Two-sided Wilcoxon test	0.25	25
8.10401e-71	0.410733	0.832	0.413	1.88588e-66	Tcf7l2	EC1	Two-sided Wilcoxon test	0.25	25
3.09542e-66	0.410707	0.88	0.468	7.20335e-62	Ndfip1	EC1	Two-sided Wilcoxon test	0.25	25
1.78481e-74	0.410476	0.833	0.404	4.15344e-70	Ddx17	EC1	Two-sided Wilcoxon test	0.25	25
5.46689e-100	0.410178	0.441	0.117	1.2722e-95	Sobp	EC1	Two-sided Wilcoxon test	0.25	25
4.12563e-49	0.409447	0.977	0.709	9.60075e-45	Srsf11	EC1	Two-sided Wilcoxon test	0.25	25
8.05575e-59	0.408389	0.675	0.317	1.87465e-54	Ankrd44	EC1	Two-sided Wilcoxon test	0.25	25
3.69894e-66	0.407887	0.757	0.365	8.6078e-62	Ralgapa2	EC1	Two-sided Wilcoxon test	0.25	25
1.04649e-72	0.407835	0.86	0.437	2.43529e-68	Ccdc50	EC1	Two-sided Wilcoxon test	0.25	25
1.93582e-97	0.407801	0.383	0.09	4.50484e-93	Xylt1	EC1	Two-sided Wilcoxon test	0.25	25
1.85093e-89	0.407657	0.642	0.245	4.30729e-85	Plekha5	EC1	Two-sided Wilcoxon test	0.25	25
1.79237e-71	0.407636	0.62	0.257	4.17102e-67	Fry	EC1	Two-sided Wilcoxon test	0.25	25
1.87027e-99	0.407599	0.736	0.297	4.3523e-95	Cttn	EC1	Two-sided Wilcoxon test	0.25	25
6.11259e-133	0.407561	0.634	0.184	1.42246e-128	Tnrc18	EC1	Two-sided Wilcoxon test	0.25	25
2.33045e-34	0.407418	0.957	0.878	5.4232e-30	Gng5	EC1	Two-sided Wilcoxon test	0.25	25
1.64767e-115	0.407299	0.56	0.159	3.8343e-111	Tcim	EC1	Two-sided Wilcoxon test	0.25	25
1.00095e-69	0.407144	0.871	0.439	2.3293e-65	Nisch	EC1	Two-sided Wilcoxon test	0.25	25
3.056e-89	0.406935	0.591	0.214	7.11161e-85	Znrf3	EC1	Two-sided Wilcoxon test	0.25	25
7.70867e-99	0.406736	0.603	0.209	1.79388e-94	Nedd9	EC1	Two-sided Wilcoxon test	0.25	25
1.97374e-24	0.406379	0.484	0.282	4.59309e-20	Xist	EC1	Two-sided Wilcoxon test	0.25	25
1.44013e-58	0.405519	0.877	0.484	3.35133e-54	Ubap2l	EC1	Two-sided Wilcoxon test	0.25	25
9.87438e-52	0.405502	0.891	0.506	2.29787e-47	Lman1	EC1	Two-sided Wilcoxon test	0.25	25
1.48291e-86	0.404983	0.768	0.327	3.45088e-82	Tab2	EC1	Two-sided Wilcoxon test	0.25	25
3.82813e-47	0.404863	0.878	0.537	8.90844e-43	Ctsb	EC1	Two-sided Wilcoxon test	0.25	25
3.81003e-47	0.404555	0.964	0.574	8.86631e-43	Srek1	EC1	Two-sided Wilcoxon test	0.25	25
1.68881e-53	0.403681	0.881	0.499	3.93003e-49	Dync1i2	EC1	Two-sided Wilcoxon test	0.25	25
8.27976e-32	0.403077	0.98	0.98	1.92678e-27	Tmsb10	EC1	Two-sided Wilcoxon test	0.25	25
5.71612e-79	0.402848	0.822	0.376	1.3302e-74	Evl	EC1	Two-sided Wilcoxon test	0.25	25
4.27059e-35	0.402571	0.99	0.909	9.93809e-31	Hspa5	EC1	Two-sided Wilcoxon test	0.25	25
8.64582e-99	0.402497	0.769	0.315	2.01197e-94	Smad4	EC1	Two-sided Wilcoxon test	0.25	25
6.52463e-94	0.40201	0.678	0.264	1.51835e-89	Myo9a	EC1	Two-sided Wilcoxon test	0.25	25
2.24591e-97	0.401752	0.669	0.261	5.22646e-93	Rras	EC1	Two-sided Wilcoxon test	0.25	25
6.13241e-87	0.401424	0.763	0.331	1.42707e-82	Tfdp2	EC1	Two-sided Wilcoxon test	0.25	25
3.20256e-53	0.4014	0.914	0.534	7.45269e-49	Clint1	EC1	Two-sided Wilcoxon test	0.25	25
2.18647e-123	0.401329	0.647	0.21	5.08813e-119	Smad1	EC1	Two-sided Wilcoxon test	0.25	25
8.54219e-85	0.40103	0.821	0.371	1.98785e-80	Gatad2b	EC1	Two-sided Wilcoxon test	0.25	25
4.12491e-69	0.400754	0.847	0.41	9.59909e-65	Zfp280d	EC1	Two-sided Wilcoxon test	0.25	25
5.85768e-62	0.399729	0.92	0.48	1.36314e-57	Ascc3	EC1	Two-sided Wilcoxon test	0.25	25
3.56293e-44	0.399568	0.981	0.714	8.29131e-40	Luc7l2	EC1	Two-sided Wilcoxon test	0.25	25
1.04332e-58	0.399355	0.896	0.481	2.4279e-54	Zeb1	EC1	Two-sided Wilcoxon test	0.25	25
2.67658e-47	0.399231	0.944	0.574	6.22867e-43	Arid4b	EC1	Two-sided Wilcoxon test	0.25	25
6.20944e-41	0.399138	0.941	0.79	1.445e-36	Ppib	EC1	Two-sided Wilcoxon test	0.25	25
1.17291e-45	0.399108	0.556	0.264	2.72947e-41	Ccdc141	EC1	Two-sided Wilcoxon test	0.25	25
1.42243e-152	0.398788	0.476	0.088	3.31015e-148	Gpm6b	EC1	Two-sided Wilcoxon test	0.25	25
1.87046e-43	0.398392	0.937	0.591	4.35276e-39	Fermt2	EC1	Two-sided Wilcoxon test	0.25	25
1.1191e-165	0.397921	0.457	0.075	2.60425e-161	Spint2	EC1	Two-sided Wilcoxon test	0.25	25
2.0949e-96	0.39753	0.639	0.233	4.87505e-92	Fam102b	EC1	Two-sided Wilcoxon test	0.25	25
6.69891e-47	0.397143	0.914	0.557	1.5589e-42	Pak2	EC1	Two-sided Wilcoxon test	0.25	25
9.57468e-83	0.397123	0.764	0.343	2.22812e-78	Srpk2	EC1	Two-sided Wilcoxon test	0.25	25
1.26213e-81	0.396774	0.776	0.348	2.93711e-77	Trim44	EC1	Two-sided Wilcoxon test	0.25	25
2.4313e-54	0.396617	0.917	0.518	5.65789e-50	Zfr	EC1	Two-sided Wilcoxon test	0.25	25
1.8794e-89	0.396503	0.668	0.267	4.37355e-85	Cdc42ep5	EC1	Two-sided Wilcoxon test	0.25	25
5.59245e-81	0.396216	0.793	0.359	1.30142e-76	Osbpl9	EC1	Two-sided Wilcoxon test	0.25	25
3.00708e-101	0.39618	0.286	0.044	6.99777e-97	Ror1	EC1	Two-sided Wilcoxon test	0.25	25
1.3135e-208	0.396021	0.376	0.025	3.05665e-204	Erbb3	EC1	Two-sided Wilcoxon test	0.25	25
3.46905e-138	0.395174	0.416	0.071	8.07282e-134	Col9a1	EC1	Two-sided Wilcoxon test	0.25	25
5.18199e-93	0.394355	0.763	0.318	1.2059e-88	Zfyve9	EC1	Two-sided Wilcoxon test	0.25	25
8.69595e-111	0.394087	0.627	0.207	2.02364e-106	Tgfb1i1	EC1	Two-sided Wilcoxon test	0.25	25
6.11622e-60	0.393895	0.876	0.469	1.4233e-55	Kdm1a	EC1	Two-sided Wilcoxon test	0.25	25
1.90519e-54	0.393679	0.985	0.751	4.43356e-50	Csnk1a1	EC1	Two-sided Wilcoxon test	0.25	25
8.25476e-84	0.393678	0.445	0.136	1.92097e-79	Rin2	EC1	Two-sided Wilcoxon test	0.25	25
1.14128e-66	0.393461	0.818	0.409	2.65588e-62	Arl15	EC1	Two-sided Wilcoxon test	0.25	25
7.36498e-52	0.392257	0.97	0.836	1.7139e-47	Morf4l1	EC1	Two-sided Wilcoxon test	0.25	25
7.26034e-82	0.392068	0.662	0.267	1.68955e-77	Kalrn	EC1	Two-sided Wilcoxon test	0.25	25
3.51296e-82	0.391771	0.625	0.238	8.17501e-78	Atxn1	EC1	Two-sided Wilcoxon test	0.25	25
2.54866e-88	0.391095	0.801	0.355	5.93099e-84	Fkbp9	EC1	Two-sided Wilcoxon test	0.25	25
9.02866e-111	0.390768	0.496	0.134	2.10106e-106	Fat1	EC1	Two-sided Wilcoxon test	0.25	25
1.01758e-60	0.390578	0.888	0.456	2.36801e-56	Nf1	EC1	Two-sided Wilcoxon test	0.25	25
4.86542e-51	0.39031	0.914	0.536	1.13223e-46	Ube2r2	EC1	Two-sided Wilcoxon test	0.25	25
4.23671e-77	0.389486	0.764	0.343	9.85926e-73	Tiparp	EC1	Two-sided Wilcoxon test	0.25	25
1.51522e-82	0.389381	0.812	0.382	3.52607e-78	Chic2	EC1	Two-sided Wilcoxon test	0.25	25
2.9969e-78	0.38924	0.805	0.368	6.97409e-74	Rapgef2	EC1	Two-sided Wilcoxon test	0.25	25
2.08155e-60	0.388998	0.85	0.429	4.84398e-56	Col3a1	EC1	Two-sided Wilcoxon test	0.25	25
2.47619e-48	0.388794	0.898	0.546	5.76234e-44	Scaf11	EC1	Two-sided Wilcoxon test	0.25	25
3.14216e-46	0.388521	0.955	0.576	7.31213e-42	Ythdc1	EC1	Two-sided Wilcoxon test	0.25	25
7.87158e-73	0.388013	0.782	0.364	1.8318e-68	Itch	EC1	Two-sided Wilcoxon test	0.25	25
1.14406e-77	0.387849	0.734	0.324	2.66235e-73	Csnk1g1	EC1	Two-sided Wilcoxon test	0.25	25
3.16444e-42	0.387648	0.718	0.392	7.36396e-38	H1f0	EC1	Two-sided Wilcoxon test	0.25	25
8.18185e-70	0.387562	0.818	0.401	1.904e-65	Peli1	EC1	Two-sided Wilcoxon test	0.25	25
2.4466e-57	0.387288	0.791	0.418	5.69349e-53	Basp1	EC1	Two-sided Wilcoxon test	0.25	25
2.68098e-82	0.386532	0.781	0.353	6.23891e-78	Lrpap1	EC1	Two-sided Wilcoxon test	0.25	25
1.80025e-90	0.386227	0.767	0.321	4.18937e-86	Skil	EC1	Two-sided Wilcoxon test	0.25	25
7.2596e-83	0.385975	0.655	0.268	1.68938e-78	Nes	EC1	Two-sided Wilcoxon test	0.25	25
9.31319e-95	0.385876	0.712	0.279	2.16727e-90	Tasor2	EC1	Two-sided Wilcoxon test	0.25	25
5.74786e-58	0.385439	0.902	0.499	1.33759e-53	Zfand3	EC1	Two-sided Wilcoxon test	0.25	25
1.31488e-43	0.385197	0.96	0.634	3.05986e-39	Rbpms	EC1	Two-sided Wilcoxon test	0.25	25
1.44226e-71	0.385103	0.837	0.407	3.35629e-67	Rbm6	EC1	Two-sided Wilcoxon test	0.25	25
7.3199e-92	0.384909	0.667	0.257	1.70341e-87	Kif13a	EC1	Two-sided Wilcoxon test	0.25	25
2.24505e-63	0.384488	0.825	0.411	5.22445e-59	Igf2bp2	EC1	Two-sided Wilcoxon test	0.25	25
6.23792e-42	0.384365	0.972	0.697	1.45163e-37	Sf3b1	EC1	Two-sided Wilcoxon test	0.25	25
2.18361e-44	0.384314	0.934	0.618	5.08149e-40	Hdlbp	EC1	Two-sided Wilcoxon test	0.25	25
4.99375e-73	0.383921	0.576	0.226	1.1621e-68	2610307P16Rik	EC1	Two-sided Wilcoxon test	0.25	25
8.32201e-74	0.383016	0.803	0.373	1.93661e-69	Ttc28	EC1	Two-sided Wilcoxon test	0.25	25
8.50348e-54	0.382409	0.875	0.47	1.97884e-49	Trpm7	EC1	Two-sided Wilcoxon test	0.25	25
9.32539e-59	0.382319	0.875	0.452	2.17011e-54	Gnaq	EC1	Two-sided Wilcoxon test	0.25	25
1.19921e-101	0.382063	0.647	0.231	2.79068e-97	Bcl9	EC1	Two-sided Wilcoxon test	0.25	25
2.18579e-55	0.382011	0.888	0.482	5.08656e-51	Wdr33	EC1	Two-sided Wilcoxon test	0.25	25
4.77197e-107	0.381929	0.618	0.217	1.11049e-102	Casp6	EC1	Two-sided Wilcoxon test	0.25	25
6.77251e-39	0.381871	0.964	0.636	1.57603e-34	Atrx	EC1	Two-sided Wilcoxon test	0.25	25
2.72885e-72	0.381615	0.667	0.284	6.35031e-68	Rasgef1b	EC1	Two-sided Wilcoxon test	0.25	25
3.62104e-92	0.381594	0.662	0.261	8.42652e-88	Kifap3	EC1	Two-sided Wilcoxon test	0.25	25
1.72192e-72	0.381586	0.467	0.168	4.00709e-68	Lpar1	EC1	Two-sided Wilcoxon test	0.25	25
1.89563e-88	0.381205	0.591	0.216	4.41132e-84	Mgat5	EC1	Two-sided Wilcoxon test	0.25	25
8.88571e-84	0.38087	0.713	0.298	2.06779e-79	Lrp6	EC1	Two-sided Wilcoxon test	0.25	25
1.50557e-40	0.379975	0.931	0.64	3.50361e-36	Ywhaz	EC1	Two-sided Wilcoxon test	0.25	25
3.61639e-86	0.379824	0.565	0.208	8.41571e-82	Gata5	EC1	Two-sided Wilcoxon test	0.25	25
1.21432e-79	0.379406	0.823	0.377	2.82584e-75	Dcaf8	EC1	Two-sided Wilcoxon test	0.25	25
9.81674e-74	0.379309	0.683	0.298	2.28445e-69	Nfatc1	EC1	Two-sided Wilcoxon test	0.25	25
2.98744e-109	0.379267	0.513	0.145	6.95208e-105	Snx7	EC1	Two-sided Wilcoxon test	0.25	25
3.6344e-49	0.379245	0.915	0.556	8.45761e-45	Hnrnpr	EC1	Two-sided Wilcoxon test	0.25	25
9.06516e-98	0.379221	0.556	0.186	2.10955e-93	Wipf1	EC1	Two-sided Wilcoxon test	0.25	25
3.70429e-75	0.379115	0.82	0.402	8.62024e-71	Rab6a	EC1	Two-sided Wilcoxon test	0.25	25
1.33529e-87	0.37901	0.694	0.276	3.10735e-83	Atf7ip	EC1	Two-sided Wilcoxon test	0.25	25
4.03314e-70	0.378048	0.82	0.395	9.38552e-66	Cyfip1	EC1	Two-sided Wilcoxon test	0.25	25
1.16298e-92	0.37773	0.746	0.312	2.70637e-88	Ptpra	EC1	Two-sided Wilcoxon test	0.25	25
5.96498e-69	0.377689	0.86	0.44	1.38811e-64	Rcc2	EC1	Two-sided Wilcoxon test	0.25	25
2.13282e-56	0.377504	0.866	0.482	4.96329e-52	Adam10	EC1	Two-sided Wilcoxon test	0.25	25
1.80589e-78	0.377442	0.769	0.341	4.20249e-74	Fam13b	EC1	Two-sided Wilcoxon test	0.25	25
2.35084e-148	0.377394	0.446	0.08	5.47065e-144	Gas7	EC1	Two-sided Wilcoxon test	0.25	25
5.74128e-79	0.377134	0.429	0.132	1.33605e-74	Npas3	EC1	Two-sided Wilcoxon test	0.25	25
4.53284e-97	0.376893	0.449	0.123	1.05484e-92	Sulf1	EC1	Two-sided Wilcoxon test	0.25	25
3.09747e-67	0.376482	0.802	0.392	7.20812e-63	Fnip1	EC1	Two-sided Wilcoxon test	0.25	25
1.98884e-67	0.376409	0.831	0.402	4.62822e-63	Asxl1	EC1	Two-sided Wilcoxon test	0.25	25
1.68312e-89	0.375997	0.375	0.092	3.9168e-85	Grik2	EC1	Two-sided Wilcoxon test	0.25	25
1.1955e-102	0.37546	0.634	0.22	2.78205e-98	Spats2l	EC1	Two-sided Wilcoxon test	0.25	25
3.77744e-54	0.375288	0.873	0.477	8.79049e-50	Chd2	EC1	Two-sided Wilcoxon test	0.25	25
6.25436e-72	0.375152	0.797	0.383	1.45545e-67	Trim33	EC1	Two-sided Wilcoxon test	0.25	25
1.35426e-121	0.374947	0.56	0.158	3.15151e-117	Dse	EC1	Two-sided Wilcoxon test	0.25	25
3.2698e-82	0.374455	0.744	0.325	7.60916e-78	Scmh1	EC1	Two-sided Wilcoxon test	0.25	25
8.62475e-41	0.374228	0.776	0.472	2.00706e-36	Gyg	EC1	Two-sided Wilcoxon test	0.25	25
2.42654e-143	0.373948	0.523	0.119	5.64681e-139	Snx10	EC1	Two-sided Wilcoxon test	0.25	25
1.03612e-59	0.373399	0.84	0.428	2.41115e-55	Chd7	EC1	Two-sided Wilcoxon test	0.25	25
1.90564e-55	0.37326	0.837	0.472	4.43462e-51	Copb2	EC1	Two-sided Wilcoxon test	0.25	25
1.9001e-59	0.373138	0.878	0.454	4.42173e-55	Smg6	EC1	Two-sided Wilcoxon test	0.25	25
1.32608e-73	0.372773	0.798	0.379	3.08592e-69	Litaf	EC1	Two-sided Wilcoxon test	0.25	25
7.78466e-77	0.372671	0.781	0.355	1.81157e-72	Rabgap1	EC1	Two-sided Wilcoxon test	0.25	25
2.09759e-73	0.372313	0.741	0.332	4.88131e-69	Abl2	EC1	Two-sided Wilcoxon test	0.25	25
4.20143e-88	0.371826	0.714	0.297	9.77714e-84	Phf20	EC1	Two-sided Wilcoxon test	0.25	25
1.92939e-117	0.371694	0.454	0.106	4.48988e-113	Myo1e	EC1	Two-sided Wilcoxon test	0.25	25
1.10631e-109	0.371423	0.63	0.218	2.57449e-105	Gnb4	EC1	Two-sided Wilcoxon test	0.25	25
7.69316e-58	0.371322	0.897	0.479	1.79028e-53	Nsd1	EC1	Two-sided Wilcoxon test	0.25	25
1.29416e-132	0.370943	0.492	0.112	3.01164e-128	Fat4	EC1	Two-sided Wilcoxon test	0.25	25
1.12828e-66	0.370833	0.825	0.408	2.62562e-62	Zc3h13	EC1	Two-sided Wilcoxon test	0.25	25
1.17469e-33	0.370704	0.926	0.635	2.73363e-29	Lmnb1	EC1	Two-sided Wilcoxon test	0.25	25
1.82681e-45	0.370523	0.986	0.9	4.25117e-41	Gnas	EC1	Two-sided Wilcoxon test	0.25	25
1.54375e-39	0.370192	0.942	0.676	3.59245e-35	Dstn	EC1	Two-sided Wilcoxon test	0.25	25
1.68627e-44	0.370192	0.845	0.506	3.92412e-40	Rala	EC1	Two-sided Wilcoxon test	0.25	25
4.05091e-122	0.369862	0.605	0.165	9.42687e-118	Prrx2	EC1	Two-sided Wilcoxon test	0.25	25
5.11967e-83	0.368705	0.763	0.333	1.1914e-78	Ube4b	EC1	Two-sided Wilcoxon test	0.25	25
3.1542e-40	0.368433	0.945	0.618	7.34013e-36	Srsf10	EC1	Two-sided Wilcoxon test	0.25	25
3.56043e-88	0.368283	0.697	0.289	8.28549e-84	Cul4b	EC1	Two-sided Wilcoxon test	0.25	25
4.63028e-115	0.368214	0.506	0.133	1.07751e-110	Etv1	EC1	Two-sided Wilcoxon test	0.25	25
3.58617e-44	0.368035	0.912	0.548	8.34538e-40	Acin1	EC1	Two-sided Wilcoxon test	0.25	25
1.8185e-67	0.367807	0.837	0.406	4.23182e-63	Kdm5a	EC1	Two-sided Wilcoxon test	0.25	25
5.54195e-147	0.367375	0.474	0.091	1.28967e-142	Dact3	EC1	Two-sided Wilcoxon test	0.25	25
1.3231e-87	0.367282	0.472	0.147	3.07898e-83	Nedd4l	EC1	Two-sided Wilcoxon test	0.25	25
3.74906e-75	0.367151	0.719	0.326	8.72443e-71	Slc39a10	EC1	Two-sided Wilcoxon test	0.25	25
1.5052e-74	0.366934	0.818	0.383	3.50275e-70	Zmynd11	EC1	Two-sided Wilcoxon test	0.25	25
2.82244e-62	0.36676	0.871	0.449	6.5681e-58	Crebbp	EC1	Two-sided Wilcoxon test	0.25	25
7.03996e-40	0.366581	0.942	0.613	1.63827e-35	Ktn1	EC1	Two-sided Wilcoxon test	0.25	25
1.85183e-88	0.366421	0.594	0.213	4.30939e-84	Atf7	EC1	Two-sided Wilcoxon test	0.25	25
4.92811e-75	0.366224	0.807	0.378	1.14682e-70	Serinc1	EC1	Two-sided Wilcoxon test	0.25	25
8.72004e-63	0.366129	0.832	0.415	2.02924e-58	Epb41l2	EC1	Two-sided Wilcoxon test	0.25	25
1.08062e-145	0.365577	0.574	0.137	2.51471e-141	Chsy1	EC1	Two-sided Wilcoxon test	0.25	25
7.50161e-87	0.36555	0.501	0.164	1.7457e-82	Ankrd12	EC1	Two-sided Wilcoxon test	0.25	25
3.73637e-75	0.365496	0.739	0.335	8.69491e-71	Pdxdc1	EC1	Two-sided Wilcoxon test	0.25	25
1.88406e-56	0.364813	0.766	0.393	4.38441e-52	Frmd4b	EC1	Two-sided Wilcoxon test	0.25	25
3.35799e-83	0.36468	0.747	0.321	7.81438e-79	Daam1	EC1	Two-sided Wilcoxon test	0.25	25
7.51553e-63	0.364303	0.82	0.406	1.74894e-58	Sqstm1	EC1	Two-sided Wilcoxon test	0.25	25
1.25451e-51	0.362959	0.91	0.507	2.91936e-47	Nipbl	EC1	Two-sided Wilcoxon test	0.25	25
5.02837e-73	0.362882	0.895	0.448	1.17015e-68	Trio	EC1	Two-sided Wilcoxon test	0.25	25
1.24804e-37	0.362748	0.957	0.624	2.90432e-33	Fxr1	EC1	Two-sided Wilcoxon test	0.25	25
8.81315e-45	0.362414	0.897	0.55	2.05091e-40	Atxn10	EC1	Two-sided Wilcoxon test	0.25	25
2.38411e-68	0.362218	0.83	0.394	5.54807e-64	Rhobtb3	EC1	Two-sided Wilcoxon test	0.25	25
1.5327e-38	0.362165	0.965	0.685	3.56674e-34	Snrnp70	EC1	Two-sided Wilcoxon test	0.25	25
[truncated: 4,490 more rows]
