# Supplementary material for: Endothelial RNF20 suppresses endothelial-to-mesenchymal transition and safeguards physiological angiocrine signaling to prevent congenital heart disease
Source: Nat Commun. 2025 Oct 27;16:9480. doi: 10.1038/s41467-025-65291-0 (PMC12559710; doi:10.1038/s41467-025-65291-0)
Supplement: Supplementary file 6 — Supplementary Data 3 [file 41467_2025_65291_MOESM6_ESM.xlsx]

## Sheet: Fig 5c
Supplementary Data 3. Marker expression in different cardiac cell populations from control and Rnf20iEC-KO embryos.
p_val	avg_log2FC	pct.1	pct.2	p_val_adj	gene	celltype	Test_used	fc.threshold (log2)	min.pct (%)
0	1.92927	0.995	0.62	0	Gpc6	OFT/AVCm1	Two-sided Wilcoxon test	0.25	25
0	1.66069	0.885	0.364	0	Tenm4	OFT/AVCm1	Two-sided Wilcoxon test	0.25	25
0	1.64366	0.745	0.236	0	Epha3	OFT/AVCm1	Two-sided Wilcoxon test	0.25	25
0	1.59841	0.97	0.689	0	Ptn	OFT/AVCm1	Two-sided Wilcoxon test	0.25	25
8.18962e-306	1.59198	0.722	0.337	1.92325e-301	Sema3a	OFT/AVCm1	Two-sided Wilcoxon test	0.25	25
0	1.49066	0.974	0.569	0	Robo1	OFT/AVCm1	Two-sided Wilcoxon test	0.25	25
0	1.46692	0.902	0.503	0	Unc5c	OFT/AVCm1	Two-sided Wilcoxon test	0.25	25
1.53292e-305	1.45591	0.575	0.199	3.59991e-301	Crabp1	OFT/AVCm1	Two-sided Wilcoxon test	0.25	25
0	1.41628	0.875	0.382	0	Ror1	OFT/AVCm1	Two-sided Wilcoxon test	0.25	25
0	1.41534	0.731	0.23	0	Sema5a	OFT/AVCm1	Two-sided Wilcoxon test	0.25	25
0	1.40206	0.754	0.243	0	Bnc2	OFT/AVCm1	Two-sided Wilcoxon test	0.25	25
0	1.39048	0.971	0.467	0	Aff3	OFT/AVCm1	Two-sided Wilcoxon test	0.25	25
5.44334e-249	1.38726	0.832	0.511	1.27831e-244	Tmtc2	OFT/AVCm1	Two-sided Wilcoxon test	0.25	25
0	1.37975	0.759	0.175	0	Tmem132c	OFT/AVCm1	Two-sided Wilcoxon test	0.25	25
0	1.37264	0.974	0.697	0	Hmga2	OFT/AVCm1	Two-sided Wilcoxon test	0.25	25
0	1.33238	0.898	0.45	0	Slit3	OFT/AVCm1	Two-sided Wilcoxon test	0.25	25
1.6345e-196	1.32624	0.543	0.25	3.83847e-192	Ebf3	OFT/AVCm1	Two-sided Wilcoxon test	0.25	25
0	1.30365	0.988	0.658	0	Meis1	OFT/AVCm1	Two-sided Wilcoxon test	0.25	25
0	1.27947	0.849	0.36	0	Plxdc2	OFT/AVCm1	Two-sided Wilcoxon test	0.25	25
0	1.27888	0.844	0.283	0	Tshz3	OFT/AVCm1	Two-sided Wilcoxon test	0.25	25
0	1.24152	0.997	0.83	0	Pbx1	OFT/AVCm1	Two-sided Wilcoxon test	0.25	25
0	1.20906	0.942	0.599	0	Zfhx3	OFT/AVCm1	Two-sided Wilcoxon test	0.25	25
0	1.20842	0.997	0.709	0	Gpc3	OFT/AVCm1	Two-sided Wilcoxon test	0.25	25
1.65207e-221	1.19907	0.481	0.165	3.87971e-217	Lsamp	OFT/AVCm1	Two-sided Wilcoxon test	0.25	25
0	1.19695	0.607	0.234	0	Pde5a	OFT/AVCm1	Two-sided Wilcoxon test	0.25	25
1.28566e-298	1.19467	0.887	0.516	3.01925e-294	Foxp2	OFT/AVCm1	Two-sided Wilcoxon test	0.25	25
0	1.18761	0.949	0.488	0	Tshz2	OFT/AVCm1	Two-sided Wilcoxon test	0.25	25
0	1.15032	0.802	0.282	0	Zfhx4	OFT/AVCm1	Two-sided Wilcoxon test	0.25	25
0	1.12117	0.969	0.589	0	Frmd4a	OFT/AVCm1	Two-sided Wilcoxon test	0.25	25
0	1.10057	0.977	0.564	0	Tenm3	OFT/AVCm1	Two-sided Wilcoxon test	0.25	25
0	1.09937	0.881	0.434	0	Mir100hg	OFT/AVCm1	Two-sided Wilcoxon test	0.25	25
0	1.08029	0.631	0.199	0	Prrx1	OFT/AVCm1	Two-sided Wilcoxon test	0.25	25
1.44922e-147	1.06571	0.679	0.383	3.40334e-143	Sgcd	OFT/AVCm1	Two-sided Wilcoxon test	0.25	25
2.27778e-302	1.05891	0.878	0.457	5.34914e-298	Adgrl3	OFT/AVCm1	Two-sided Wilcoxon test	0.25	25
8.35794e-71	1.04615	0.562	0.373	1.96278e-66	Alcam	OFT/AVCm1	Two-sided Wilcoxon test	0.25	25
0	1.03425	0.473	0.107	0	Runx2	OFT/AVCm1	Two-sided Wilcoxon test	0.25	25
0	1.0146	0.997	0.758	0	Auts2	OFT/AVCm1	Two-sided Wilcoxon test	0.25	25
4.97917e-119	1.01458	0.419	0.188	1.16931e-114	Pcdh9	OFT/AVCm1	Two-sided Wilcoxon test	0.25	25
8.42586e-183	1.00198	0.58	0.271	1.97873e-178	Eya4	OFT/AVCm1	Two-sided Wilcoxon test	0.25	25
0	0.995766	0.894	0.402	0	Col1a2	OFT/AVCm1	Two-sided Wilcoxon test	0.25	25
3.29235e-204	0.988023	0.346	0.092	7.73175e-200	Cadm2	OFT/AVCm1	Two-sided Wilcoxon test	0.25	25
2.00443e-267	0.971851	0.964	0.601	4.7072e-263	Fbxl7	OFT/AVCm1	Two-sided Wilcoxon test	0.25	25
1.99248e-189	0.962277	0.297	0.071	4.67914e-185	Ebf2	OFT/AVCm1	Two-sided Wilcoxon test	0.25	25
8.64567e-268	0.959809	0.969	0.688	2.03035e-263	Cald1	OFT/AVCm1	Two-sided Wilcoxon test	0.25	25
2.11456e-285	0.948204	0.969	0.622	4.96582e-281	Ptprd	OFT/AVCm1	Two-sided Wilcoxon test	0.25	25
0	0.947135	0.96	0.57	0	Kalrn	OFT/AVCm1	Two-sided Wilcoxon test	0.25	25
1.13523e-278	0.945613	0.479	0.136	2.66597e-274	Kcnb2	OFT/AVCm1	Two-sided Wilcoxon test	0.25	25
1.57161e-300	0.944945	0.915	0.562	3.69078e-296	Bach2	OFT/AVCm1	Two-sided Wilcoxon test	0.25	25
0	0.943612	0.891	0.523	0	Sox11	OFT/AVCm1	Two-sided Wilcoxon test	0.25	25
0	0.938794	0.936	0.574	0	Zfp462	OFT/AVCm1	Two-sided Wilcoxon test	0.25	25
0	0.927218	0.922	0.541	0	Adgrl2	OFT/AVCm1	Two-sided Wilcoxon test	0.25	25
1.73913e-163	0.920279	0.293	0.08	4.08417e-159	Adamts18	OFT/AVCm1	Two-sided Wilcoxon test	0.25	25
9.58341e-242	0.916559	0.918	0.676	2.25057e-237	Pbx3	OFT/AVCm1	Two-sided Wilcoxon test	0.25	25
0	0.911334	0.758	0.236	0	Zfp503	OFT/AVCm1	Two-sided Wilcoxon test	0.25	25
1.80897e-146	0.910066	0.772	0.509	4.24819e-142	Mpped2	OFT/AVCm1	Two-sided Wilcoxon test	0.25	25
1.96517e-288	0.908787	0.97	0.574	4.61501e-284	Cdh11	OFT/AVCm1	Two-sided Wilcoxon test	0.25	25
9.85106e-194	0.901999	0.414	0.132	2.31342e-189	Adgrb3	OFT/AVCm1	Two-sided Wilcoxon test	0.25	25
1.84403e-187	0.899524	0.716	0.391	4.33053e-183	Adamts9	OFT/AVCm1	Two-sided Wilcoxon test	0.25	25
1.07159e-281	0.891557	0.839	0.428	2.51651e-277	Prickle2	OFT/AVCm1	Two-sided Wilcoxon test	0.25	25
5.00439e-228	0.89033	0.768	0.383	1.17523e-223	Robo2	OFT/AVCm1	Two-sided Wilcoxon test	0.25	25
0	0.875684	0.691	0.268	0	Epha4	OFT/AVCm1	Two-sided Wilcoxon test	0.25	25
3.37896e-262	0.870956	0.898	0.536	7.93516e-258	Trps1	OFT/AVCm1	Two-sided Wilcoxon test	0.25	25
0	0.859613	0.657	0.176	0	Ednra	OFT/AVCm1	Two-sided Wilcoxon test	0.25	25
5.50306e-258	0.857627	0.856	0.478	1.29234e-253	Rora	OFT/AVCm1	Two-sided Wilcoxon test	0.25	25
2.12641e-139	0.857344	0.619	0.327	4.99365e-135	Fat3	OFT/AVCm1	Two-sided Wilcoxon test	0.25	25
9.74704e-266	0.852416	0.902	0.513	2.28899e-261	Pdzrn3	OFT/AVCm1	Two-sided Wilcoxon test	0.25	25
4.08279e-224	0.851741	0.947	0.589	9.58802e-220	Efna5	OFT/AVCm1	Two-sided Wilcoxon test	0.25	25
4.00283e-253	0.850372	0.954	0.662	9.40024e-249	Atrnl1	OFT/AVCm1	Two-sided Wilcoxon test	0.25	25
1.81068e-125	0.839689	0.481	0.228	4.2522e-121	Tenm2	OFT/AVCm1	Two-sided Wilcoxon test	0.25	25
4.963e-101	0.836775	0.822	0.575	1.16551e-96	Kcnq5	OFT/AVCm1	Two-sided Wilcoxon test	0.25	25
6.53373e-167	0.834379	0.44	0.168	1.53438e-162	Negr1	OFT/AVCm1	Two-sided Wilcoxon test	0.25	25
4.40613e-257	0.827255	0.776	0.394	1.03473e-252	Lhfpl2	OFT/AVCm1	Two-sided Wilcoxon test	0.25	25
0	0.822793	0.733	0.203	0	Ddr2	OFT/AVCm1	Two-sided Wilcoxon test	0.25	25
4.86687e-241	0.81588	0.976	0.757	1.14294e-236	Foxp1	OFT/AVCm1	Two-sided Wilcoxon test	0.25	25
4.93645e-272	0.812739	0.943	0.579	1.15928e-267	Setbp1	OFT/AVCm1	Two-sided Wilcoxon test	0.25	25
0	0.808176	0.697	0.252	0	Col26a1	OFT/AVCm1	Two-sided Wilcoxon test	0.25	25
1.01437e-246	0.80753	0.839	0.394	2.38215e-242	Col1a1	OFT/AVCm1	Two-sided Wilcoxon test	0.25	25
4.99832e-276	0.806366	0.378	0.081	1.17381e-271	Rspo2	OFT/AVCm1	Two-sided Wilcoxon test	0.25	25
0	0.802523	0.771	0.261	0	Mfap4	OFT/AVCm1	Two-sided Wilcoxon test	0.25	25
4.178e-140	0.800907	0.408	0.164	9.81163e-136	Pcdh11x	OFT/AVCm1	Two-sided Wilcoxon test	0.25	25
1.81901e-139	0.799357	0.436	0.181	4.27177e-135	Ctnna2	OFT/AVCm1	Two-sided Wilcoxon test	0.25	25
4.24673e-166	0.79886	0.481	0.195	9.97301e-162	Tnc	OFT/AVCm1	Two-sided Wilcoxon test	0.25	25
1.17792e-286	0.79883	0.918	0.562	2.76623e-282	Basp1	OFT/AVCm1	Two-sided Wilcoxon test	0.25	25
5.37836e-254	0.797296	0.997	0.733	1.26305e-249	Nfib	OFT/AVCm1	Two-sided Wilcoxon test	0.25	25
4.60509e-189	0.797143	0.275	0.061	1.08146e-184	Dkk2	OFT/AVCm1	Two-sided Wilcoxon test	0.25	25
1.58005e-169	0.793693	0.849	0.538	3.71059e-165	Hmcn1	OFT/AVCm1	Two-sided Wilcoxon test	0.25	25
1.95263e-213	0.79133	0.793	0.425	4.58555e-209	Sfrp1	OFT/AVCm1	Two-sided Wilcoxon test	0.25	25
1.77695e-172	0.782402	0.677	0.347	4.17299e-168	Aff2	OFT/AVCm1	Two-sided Wilcoxon test	0.25	25
2.43479e-272	0.782129	0.753	0.352	5.71787e-268	5730522E02Rik	OFT/AVCm1	Two-sided Wilcoxon test	0.25	25
2.26158e-223	0.781058	0.966	0.614	5.31109e-219	Meg3	OFT/AVCm1	Two-sided Wilcoxon test	0.25	25
2.28844e-131	0.778937	0.384	0.16	5.37417e-127	a	OFT/AVCm1	Two-sided Wilcoxon test	0.25	25
0	0.77477	0.936	0.514	0	Gli3	OFT/AVCm1	Two-sided Wilcoxon test	0.25	25
0	0.770043	0.873	0.489	0	H2afy2	OFT/AVCm1	Two-sided Wilcoxon test	0.25	25
9.90671e-276	0.769612	0.841	0.402	2.32649e-271	2610307P16Rik	OFT/AVCm1	Two-sided Wilcoxon test	0.25	25
4.15727e-215	0.76765	0.372	0.103	9.76294e-211	Astn2	OFT/AVCm1	Two-sided Wilcoxon test	0.25	25
2.95584e-181	0.764185	0.592	0.263	6.94149e-177	Nav3	OFT/AVCm1	Two-sided Wilcoxon test	0.25	25
7.05249e-276	0.761749	0.864	0.461	1.65621e-271	Ror2	OFT/AVCm1	Two-sided Wilcoxon test	0.25	25
1.83901e-202	0.761195	0.735	0.377	4.31873e-198	Etl4	OFT/AVCm1	Two-sided Wilcoxon test	0.25	25
2.50155e-241	0.759353	0.874	0.493	5.87464e-237	Klf12	OFT/AVCm1	Two-sided Wilcoxon test	0.25	25
1.35475e-189	0.752845	0.987	0.722	3.1815e-185	Meis2	OFT/AVCm1	Two-sided Wilcoxon test	0.25	25
4.50437e-146	0.745611	0.784	0.488	1.05781e-141	Epha7	OFT/AVCm1	Two-sided Wilcoxon test	0.25	25
1.17176e-96	0.742977	0.556	0.334	2.75177e-92	Xist	OFT/AVCm1	Two-sided Wilcoxon test	0.25	25
5.92159e-127	0.742178	0.321	0.114	1.39063e-122	Kirrel3	OFT/AVCm1	Two-sided Wilcoxon test	0.25	25
0	0.738499	0.843	0.368	0	Bcl11a	OFT/AVCm1	Two-sided Wilcoxon test	0.25	25
1.92189e-257	0.733915	0.976	0.85	4.51337e-253	Mdk	OFT/AVCm1	Two-sided Wilcoxon test	0.25	25
6.18155e-189	0.733829	0.731	0.369	1.45167e-184	Flrt2	OFT/AVCm1	Two-sided Wilcoxon test	0.25	25
4.75646e-79	0.731031	0.478	0.281	1.11701e-74	Adam12	OFT/AVCm1	Two-sided Wilcoxon test	0.25	25
3.37937e-281	0.727677	0.846	0.441	7.93611e-277	Fmnl2	OFT/AVCm1	Two-sided Wilcoxon test	0.25	25
9.10591e-181	0.725237	0.428	0.147	2.13843e-176	Ccser1	OFT/AVCm1	Two-sided Wilcoxon test	0.25	25
0	0.723583	0.797	0.322	0	Gli2	OFT/AVCm1	Two-sided Wilcoxon test	0.25	25
1.72855e-296	0.719904	0.776	0.335	4.05933e-292	Col11a1	OFT/AVCm1	Two-sided Wilcoxon test	0.25	25
1.63493e-231	0.712582	0.76	0.393	3.83947e-227	Nr2f2	OFT/AVCm1	Two-sided Wilcoxon test	0.25	25
1.36626e-195	0.71123	0.977	0.64	3.20852e-191	Rbms3	OFT/AVCm1	Two-sided Wilcoxon test	0.25	25
1.86857e-220	0.710829	0.916	0.571	4.38815e-216	Arhgap28	OFT/AVCm1	Two-sided Wilcoxon test	0.25	25
2.40013e-184	0.707633	0.929	0.623	5.63646e-180	Ptprk	OFT/AVCm1	Two-sided Wilcoxon test	0.25	25
0	0.706625	0.557	0.168	0	Tbx5	OFT/AVCm1	Two-sided Wilcoxon test	0.25	25
1.88387e-204	0.706138	0.387	0.113	4.42408e-200	Ccbe1	OFT/AVCm1	Two-sided Wilcoxon test	0.25	25
6.02593e-194	0.705899	0.449	0.161	1.41513e-189	Trabd2b	OFT/AVCm1	Two-sided Wilcoxon test	0.25	25
1.02915e-239	0.703415	0.835	0.469	2.41685e-235	Cachd1	OFT/AVCm1	Two-sided Wilcoxon test	0.25	25
3.263e-258	0.696932	0.639	0.257	7.66284e-254	Rnf150	OFT/AVCm1	Two-sided Wilcoxon test	0.25	25
1.38274e-285	0.695633	0.952	0.713	3.24722e-281	Ssbp3	OFT/AVCm1	Two-sided Wilcoxon test	0.25	25
0	0.695193	0.851	0.433	0	Chd3	OFT/AVCm1	Two-sided Wilcoxon test	0.25	25
3.76091e-275	0.694773	0.548	0.187	8.83212e-271	Itga8	OFT/AVCm1	Two-sided Wilcoxon test	0.25	25
1.14083e-271	0.694356	0.992	0.803	2.67912e-267	Tcf12	OFT/AVCm1	Two-sided Wilcoxon test	0.25	25
4.74325e-189	0.693564	0.906	0.643	1.1139e-184	Maml3	OFT/AVCm1	Two-sided Wilcoxon test	0.25	25
2.39672e-222	0.693353	0.848	0.509	5.62847e-218	Pitpnc1	OFT/AVCm1	Two-sided Wilcoxon test	0.25	25
9.8058e-109	0.692396	0.463	0.234	2.30279e-104	Adamtsl1	OFT/AVCm1	Two-sided Wilcoxon test	0.25	25
0	0.688896	0.604	0.175	0	Crabp2	OFT/AVCm1	Two-sided Wilcoxon test	0.25	25
1.18304e-252	0.688387	0.566	0.2	2.77826e-248	Lama2	OFT/AVCm1	Two-sided Wilcoxon test	0.25	25
6.61563e-149	0.682011	0.497	0.212	1.55361e-144	Col25a1	OFT/AVCm1	Two-sided Wilcoxon test	0.25	25
9.35223e-85	0.677303	0.33	0.148	2.19628e-80	Tafa2	OFT/AVCm1	Two-sided Wilcoxon test	0.25	25
7.462e-240	0.675456	0.979	0.72	1.75238e-235	Tcf4	OFT/AVCm1	Two-sided Wilcoxon test	0.25	25
1.943e-186	0.666266	0.967	0.803	4.56293e-182	Peg3	OFT/AVCm1	Two-sided Wilcoxon test	0.25	25
2.76931e-206	0.659329	0.305	0.069	6.50346e-202	Hhip	OFT/AVCm1	Two-sided Wilcoxon test	0.25	25
2.99155e-237	0.657455	0.967	0.579	7.02536e-233	Col3a1	OFT/AVCm1	Two-sided Wilcoxon test	0.25	25
2.98431e-225	0.656301	0.942	0.606	7.00835e-221	Ttc28	OFT/AVCm1	Two-sided Wilcoxon test	0.25	25
7.54712e-200	0.656213	0.573	0.246	1.77236e-195	Lef1	OFT/AVCm1	Two-sided Wilcoxon test	0.25	25
4.71019e-170	0.647692	0.84	0.536	1.10614e-165	Tanc1	OFT/AVCm1	Two-sided Wilcoxon test	0.25	25
2.42386e-300	0.647301	0.506	0.143	5.6922e-296	Sgip1	OFT/AVCm1	Two-sided Wilcoxon test	0.25	25
2.29112e-145	0.646152	0.275	0.077	5.38046e-141	Nlgn1	OFT/AVCm1	Two-sided Wilcoxon test	0.25	25
1.42289e-161	0.645488	0.987	0.692	3.34151e-157	Nfia	OFT/AVCm1	Two-sided Wilcoxon test	0.25	25
4.91559e-115	0.641909	0.729	0.503	1.15438e-110	Ptch1	OFT/AVCm1	Two-sided Wilcoxon test	0.25	25
0	0.637663	0.75	0.268	0	Clmp	OFT/AVCm1	Two-sided Wilcoxon test	0.25	25
1.14243e-234	0.636985	0.741	0.378	2.68287e-230	Sulf2	OFT/AVCm1	Two-sided Wilcoxon test	0.25	25
3.67927e-249	0.634346	0.802	0.407	8.64039e-245	Tns3	OFT/AVCm1	Two-sided Wilcoxon test	0.25	25
2.25389e-217	0.633895	0.93	0.758	5.29304e-213	H2afv	OFT/AVCm1	Two-sided Wilcoxon test	0.25	25
2.91549e-175	0.632486	0.92	0.653	6.84674e-171	Ssbp2	OFT/AVCm1	Two-sided Wilcoxon test	0.25	25
1.19839e-247	0.628816	0.791	0.369	2.81431e-243	A630012P03Rik	OFT/AVCm1	Two-sided Wilcoxon test	0.25	25
1.86589e-227	0.628303	0.579	0.223	4.38185e-223	Arhgap24	OFT/AVCm1	Two-sided Wilcoxon test	0.25	25
1.4874e-166	0.626475	0.743	0.385	3.49302e-162	Sulf1	OFT/AVCm1	Two-sided Wilcoxon test	0.25	25
8.00527e-275	0.626042	0.785	0.372	1.87996e-270	Zfp423	OFT/AVCm1	Two-sided Wilcoxon test	0.25	25
2.16815e-249	0.625007	0.651	0.27	5.09167e-245	Ust	OFT/AVCm1	Two-sided Wilcoxon test	0.25	25
1.06614e-223	0.622007	0.686	0.322	2.50372e-219	Lpar1	OFT/AVCm1	Two-sided Wilcoxon test	0.25	25
4.87386e-139	0.621371	0.596	0.313	1.14458e-134	Twist1	OFT/AVCm1	Two-sided Wilcoxon test	0.25	25
0	0.61916	0.53	0.124	0	Sfrp2	OFT/AVCm1	Two-sided Wilcoxon test	0.25	25
8.7678e-248	0.618993	0.874	0.501	2.05903e-243	Hdgfl3	OFT/AVCm1	Two-sided Wilcoxon test	0.25	25
4.65501e-25	0.61835	0.738	0.632	1.09318e-20	Hist1h1b	OFT/AVCm1	Two-sided Wilcoxon test	0.25	25
0	0.617168	0.414	0.064	0	Hoxa5	OFT/AVCm1	Two-sided Wilcoxon test	0.25	25
8.3911e-147	0.616583	0.951	0.665	1.97057e-142	Prkg1	OFT/AVCm1	Two-sided Wilcoxon test	0.25	25
3.39742e-141	0.616131	0.492	0.224	7.97851e-137	Eda	OFT/AVCm1	Two-sided Wilcoxon test	0.25	25
1.32073e-249	0.613016	0.403	0.101	3.10159e-245	Prr16	OFT/AVCm1	Two-sided Wilcoxon test	0.25	25
0	0.612931	0.742	0.278	0	6330403K07Rik	OFT/AVCm1	Two-sided Wilcoxon test	0.25	25
1.67478e-227	0.612426	0.664	0.301	3.93306e-223	Fat4	OFT/AVCm1	Two-sided Wilcoxon test	0.25	25
6.28983e-182	0.609819	0.644	0.317	1.4771e-177	Rarb	OFT/AVCm1	Two-sided Wilcoxon test	0.25	25
7.79446e-207	0.607626	0.935	0.624	1.83045e-202	Kdm5b	OFT/AVCm1	Two-sided Wilcoxon test	0.25	25
3.8036e-205	0.607066	0.95	0.698	8.93237e-201	Arid1b	OFT/AVCm1	Two-sided Wilcoxon test	0.25	25
0	0.6063	0.683	0.226	0	Pcdh18	OFT/AVCm1	Two-sided Wilcoxon test	0.25	25
0	0.604014	0.419	0.073	0	Osr1	OFT/AVCm1	Two-sided Wilcoxon test	0.25	25
7.02602e-224	0.603754	0.676	0.315	1.64999e-219	Sdc2	OFT/AVCm1	Two-sided Wilcoxon test	0.25	25
1.8196e-158	0.603564	0.559	0.27	4.27315e-154	Plxna2	OFT/AVCm1	Two-sided Wilcoxon test	0.25	25
6.74222e-200	0.603149	0.29	0.063	1.58334e-195	Ntrk3	OFT/AVCm1	Two-sided Wilcoxon test	0.25	25
2.83515e-128	0.602602	0.307	0.106	6.65807e-124	Brinp1	OFT/AVCm1	Two-sided Wilcoxon test	0.25	25
2.76305e-189	0.598428	0.951	0.82	6.48876e-185	Nasp	OFT/AVCm1	Two-sided Wilcoxon test	0.25	25
1.07512e-102	0.597347	0.261	0.091	2.52482e-98	Hcn1	OFT/AVCm1	Two-sided Wilcoxon test	0.25	25
7.97777e-259	0.596137	0.847	0.46	1.8735e-254	Zfp618	OFT/AVCm1	Two-sided Wilcoxon test	0.25	25
8.29417e-206	0.592096	0.731	0.359	1.9478e-201	Mmp16	OFT/AVCm1	Two-sided Wilcoxon test	0.25	25
1.3658e-171	0.590795	0.652	0.328	3.20744e-167	Iqgap2	OFT/AVCm1	Two-sided Wilcoxon test	0.25	25
3.62356e-144	0.589918	0.725	0.421	8.50957e-140	Fosb	OFT/AVCm1	Two-sided Wilcoxon test	0.25	25
7.87351e-257	0.583913	0.803	0.417	1.84902e-252	Arhgap42	OFT/AVCm1	Two-sided Wilcoxon test	0.25	25
8.23361e-263	0.582038	0.715	0.295	1.93358e-258	Pdgfra	OFT/AVCm1	Two-sided Wilcoxon test	0.25	25
1.13659e-181	0.576349	0.974	0.658	2.66916e-177	Fbn2	OFT/AVCm1	Two-sided Wilcoxon test	0.25	25
0	0.573163	0.587	0.122	0	Hoxb3	OFT/AVCm1	Two-sided Wilcoxon test	0.25	25
0	0.57055	0.509	0.109	0	Tbx3	OFT/AVCm1	Two-sided Wilcoxon test	0.25	25
1.75035e-109	0.569956	0.555	0.288	4.11051e-105	Magi2	OFT/AVCm1	Two-sided Wilcoxon test	0.25	25
4.66229e-168	0.567407	0.748	0.416	1.09489e-163	Ccn1	OFT/AVCm1	Two-sided Wilcoxon test	0.25	25
6.7415e-203	0.564719	0.975	0.775	1.58317e-198	Ttc3	OFT/AVCm1	Two-sided Wilcoxon test	0.25	25
0	0.560926	0.549	0.157	0	Nr2f1	OFT/AVCm1	Two-sided Wilcoxon test	0.25	25
5.71257e-156	0.557564	0.897	0.608	1.34154e-151	Runx1t1	OFT/AVCm1	Two-sided Wilcoxon test	0.25	25
6.24995e-223	0.554823	0.741	0.391	1.46774e-218	Gng2	OFT/AVCm1	Two-sided Wilcoxon test	0.25	25
2.44516e-35	0.552921	0.704	0.557	5.74221e-31	Zfpm2	OFT/AVCm1	Two-sided Wilcoxon test	0.25	25
3.0129e-190	0.551849	0.925	0.634	7.07549e-186	Phf21a	OFT/AVCm1	Two-sided Wilcoxon test	0.25	25
9.21268e-126	0.550982	0.518	0.248	2.16351e-121	Cped1	OFT/AVCm1	Two-sided Wilcoxon test	0.25	25
4.35199e-183	0.549264	0.852	0.542	1.02202e-178	Plekha5	OFT/AVCm1	Two-sided Wilcoxon test	0.25	25
4.54838e-141	0.549254	0.359	0.132	1.06814e-136	Lix1	OFT/AVCm1	Two-sided Wilcoxon test	0.25	25
3.35846e-176	0.547406	0.616	0.284	7.887e-172	Dlk1	OFT/AVCm1	Two-sided Wilcoxon test	0.25	25
1.02741e-194	0.545706	0.981	0.938	2.41276e-190	Hmgb1	OFT/AVCm1	Two-sided Wilcoxon test	0.25	25
1.05387e-118	0.545414	0.464	0.222	2.4749e-114	Nrp2	OFT/AVCm1	Two-sided Wilcoxon test	0.25	25
1.94409e-216	0.541863	0.548	0.208	4.56551e-212	Enox1	OFT/AVCm1	Two-sided Wilcoxon test	0.25	25
1.52975e-196	0.541832	0.87	0.53	3.59246e-192	Trerf1	OFT/AVCm1	Two-sided Wilcoxon test	0.25	25
1.09066e-156	0.541057	0.511	0.225	2.5613e-152	Klhl29	OFT/AVCm1	Two-sided Wilcoxon test	0.25	25
2.78127e-158	0.540042	0.895	0.638	6.53154e-154	Marcksl1	OFT/AVCm1	Two-sided Wilcoxon test	0.25	25
1.75285e-304	0.538144	0.721	0.274	4.11639e-300	Antxr1	OFT/AVCm1	Two-sided Wilcoxon test	0.25	25
4.58514e-276	0.53554	0.585	0.208	1.07678e-271	St8sia2	OFT/AVCm1	Two-sided Wilcoxon test	0.25	25
8.0464e-160	0.535307	0.444	0.174	1.88962e-155	Egfr	OFT/AVCm1	Two-sided Wilcoxon test	0.25	25
6.34395e-119	0.53454	0.344	0.135	1.48981e-114	Dok6	OFT/AVCm1	Two-sided Wilcoxon test	0.25	25
1.09129e-157	0.533779	0.76	0.45	2.56278e-153	Sh3rf1	OFT/AVCm1	Two-sided Wilcoxon test	0.25	25
7.98092e-26	0.527959	0.323	0.213	1.87424e-21	Rbfox1	OFT/AVCm1	Two-sided Wilcoxon test	0.25	25
3.56422e-197	0.526899	0.906	0.686	8.37022e-193	Cbx1	OFT/AVCm1	Two-sided Wilcoxon test	0.25	25
2.03078e-176	0.526022	0.97	0.766	4.76907e-172	Kansl1	OFT/AVCm1	Two-sided Wilcoxon test	0.25	25
4.00264e-162	0.524843	0.863	0.554	9.39979e-158	Cers6	OFT/AVCm1	Two-sided Wilcoxon test	0.25	25
5.12645e-192	0.519772	0.906	0.615	1.2039e-187	Evl	OFT/AVCm1	Two-sided Wilcoxon test	0.25	25
1.602e-237	0.518667	0.758	0.361	3.76215e-233	Asxl3	OFT/AVCm1	Two-sided Wilcoxon test	0.25	25
1.13941e-164	0.518519	0.619	0.309	2.6758e-160	Plpp3	OFT/AVCm1	Two-sided Wilcoxon test	0.25	25
2.22222e-165	0.517055	0.877	0.562	5.21866e-161	Cask	OFT/AVCm1	Two-sided Wilcoxon test	0.25	25
7.62272e-201	0.516946	0.671	0.339	1.79012e-196	Tshz1	OFT/AVCm1	Two-sided Wilcoxon test	0.25	25
8.19262e-178	0.515282	0.928	0.625	1.92396e-173	Fnbp1l	OFT/AVCm1	Two-sided Wilcoxon test	0.25	25
6.94484e-95	0.514537	0.349	0.159	1.63093e-90	Mgp	OFT/AVCm1	Two-sided Wilcoxon test	0.25	25
0	0.514272	0.536	0.086	0	S1pr3	OFT/AVCm1	Two-sided Wilcoxon test	0.25	25
0	0.513184	0.332	0.049	0	Tbx3os1	OFT/AVCm1	Two-sided Wilcoxon test	0.25	25
0	0.509933	0.566	0.147	0	Twist2	OFT/AVCm1	Two-sided Wilcoxon test	0.25	25
1.83134e-110	0.509004	0.748	0.462	4.30071e-106	Egr1	OFT/AVCm1	Two-sided Wilcoxon test	0.25	25
9.88015e-162	0.508913	0.946	0.665	2.32026e-157	Akt3	OFT/AVCm1	Two-sided Wilcoxon test	0.25	25
1.31e-252	0.507583	0.536	0.182	3.07641e-248	Cdo1	OFT/AVCm1	Two-sided Wilcoxon test	0.25	25
3.30258e-133	0.506858	0.839	0.506	7.75577e-129	Lhfp	OFT/AVCm1	Two-sided Wilcoxon test	0.25	25
1.49314e-164	0.50666	0.933	0.611	3.50649e-160	Cdk14	OFT/AVCm1	Two-sided Wilcoxon test	0.25	25
3.07092e-89	0.50548	0.447	0.224	7.21176e-85	Angpt1	OFT/AVCm1	Two-sided Wilcoxon test	0.25	25
3.56995e-163	0.502861	0.951	0.624	8.38366e-159	Farp1	OFT/AVCm1	Two-sided Wilcoxon test	0.25	25
4.9194e-198	0.50228	0.837	0.506	1.15527e-193	Tmem131l	OFT/AVCm1	Two-sided Wilcoxon test	0.25	25
3.33868e-90	0.501789	0.747	0.485	7.84057e-86	Tgfb2	OFT/AVCm1	Two-sided Wilcoxon test	0.25	25
5.44494e-209	0.500188	0.514	0.197	1.27869e-204	Ephb2	OFT/AVCm1	Two-sided Wilcoxon test	0.25	25
7.77605e-149	0.500158	0.341	0.113	1.82613e-144	Dach2	OFT/AVCm1	Two-sided Wilcoxon test	0.25	25
4.1647e-184	0.498797	0.724	0.352	9.78039e-180	Gas1	OFT/AVCm1	Two-sided Wilcoxon test	0.25	25
2.44943e-165	0.498689	0.908	0.668	5.75224e-161	H2afy	OFT/AVCm1	Two-sided Wilcoxon test	0.25	25
6.42858e-160	0.498533	0.761	0.44	1.50969e-155	Fat1	OFT/AVCm1	Two-sided Wilcoxon test	0.25	25
2.26754e-116	0.497852	0.924	0.696	5.3251e-112	Marcks	OFT/AVCm1	Two-sided Wilcoxon test	0.25	25
8.58555e-108	0.497555	0.278	0.099	2.01623e-103	Smoc2	OFT/AVCm1	Two-sided Wilcoxon test	0.25	25
4.30661e-114	0.496915	0.823	0.59	1.01136e-109	Nrip1	OFT/AVCm1	Two-sided Wilcoxon test	0.25	25
6.81649e-186	0.495884	0.913	0.59	1.60078e-181	Rhobtb3	OFT/AVCm1	Two-sided Wilcoxon test	0.25	25
2.54954e-242	0.494993	0.753	0.365	5.98734e-238	Fgfr1	OFT/AVCm1	Two-sided Wilcoxon test	0.25	25
0	0.492267	0.51	0.111	0	Tbx2	OFT/AVCm1	Two-sided Wilcoxon test	0.25	25
3.62893e-94	0.49044	0.825	0.56	8.52218e-90	Ghr	OFT/AVCm1	Two-sided Wilcoxon test	0.25	25
1.78148e-152	0.489151	0.971	0.768	4.18363e-148	Baz2b	OFT/AVCm1	Two-sided Wilcoxon test	0.25	25
3.27032e-148	0.488185	0.779	0.443	7.68001e-144	Rian	OFT/AVCm1	Two-sided Wilcoxon test	0.25	25
6.66527e-140	0.488107	0.927	0.676	1.56527e-135	Tcf7l2	OFT/AVCm1	Two-sided Wilcoxon test	0.25	25
4.71085e-178	0.485535	0.538	0.232	1.1063e-173	Itgb8	OFT/AVCm1	Two-sided Wilcoxon test	0.25	25
1.1288e-165	0.485366	0.499	0.211	2.65088e-161	A230057D06Rik	OFT/AVCm1	Two-sided Wilcoxon test	0.25	25
6.04215e-152	0.485196	0.883	0.614	1.41894e-147	Rfx3	OFT/AVCm1	Two-sided Wilcoxon test	0.25	25
2.38088e-64	0.482473	0.7	0.473	5.59125e-60	Slit2	OFT/AVCm1	Two-sided Wilcoxon test	0.25	25
3.43051e-107	0.480045	0.584	0.315	8.05621e-103	Dach1	OFT/AVCm1	Two-sided Wilcoxon test	0.25	25
1.29448e-218	0.479993	0.682	0.308	3.03995e-214	Prrx2	OFT/AVCm1	Two-sided Wilcoxon test	0.25	25
1.9931e-135	0.478989	0.893	0.605	4.6806e-131	Ube2e2	OFT/AVCm1	Two-sided Wilcoxon test	0.25	25
6.83391e-164	0.478574	0.944	0.762	1.60488e-159	Smarcc1	OFT/AVCm1	Two-sided Wilcoxon test	0.25	25
1.47403e-215	0.476962	0.755	0.386	3.46161e-211	Map2k6	OFT/AVCm1	Two-sided Wilcoxon test	0.25	25
7.11786e-109	0.476649	0.493	0.262	1.67156e-104	Asb4	OFT/AVCm1	Two-sided Wilcoxon test	0.25	25
7.10206e-179	0.476134	0.946	0.705	1.66785e-174	Ptbp2	OFT/AVCm1	Two-sided Wilcoxon test	0.25	25
1.25692e-167	0.475466	0.97	0.784	2.95174e-163	Tut4	OFT/AVCm1	Two-sided Wilcoxon test	0.25	25
4.96826e-153	0.475426	0.633	0.332	1.16675e-148	Peg10	OFT/AVCm1	Two-sided Wilcoxon test	0.25	25
1.61582e-167	0.475068	0.863	0.509	3.7946e-163	Nnat	OFT/AVCm1	Two-sided Wilcoxon test	0.25	25
2.62465e-134	0.47429	0.77	0.501	6.16372e-130	Tbc1d1	OFT/AVCm1	Two-sided Wilcoxon test	0.25	25
2.38648e-103	0.474267	0.77	0.528	5.60442e-99	Prickle1	OFT/AVCm1	Two-sided Wilcoxon test	0.25	25
6.73497e-135	0.473675	0.546	0.267	1.58164e-130	Naaladl2	OFT/AVCm1	Two-sided Wilcoxon test	0.25	25
3.08115e-181	0.470821	0.94	0.761	7.23577e-177	Hnrnpr	OFT/AVCm1	Two-sided Wilcoxon test	0.25	25
3.70123e-254	0.469635	0.596	0.216	8.69197e-250	Fndc3c1	OFT/AVCm1	Two-sided Wilcoxon test	0.25	25
6.62666e-160	0.467641	0.934	0.652	1.5562e-155	Dock7	OFT/AVCm1	Two-sided Wilcoxon test	0.25	25
3.68481e-117	0.467591	0.387	0.163	8.6534e-113	Col12a1	OFT/AVCm1	Two-sided Wilcoxon test	0.25	25
4.48708e-213	0.466594	0.817	0.438	1.05375e-208	Mfap2	OFT/AVCm1	Two-sided Wilcoxon test	0.25	25
1.66811e-157	0.466156	0.931	0.629	3.91739e-153	Igf2bp2	OFT/AVCm1	Two-sided Wilcoxon test	0.25	25
1.94718e-141	0.464642	1	0.996	4.57275e-137	Ptma	OFT/AVCm1	Two-sided Wilcoxon test	0.25	25
2.6566e-110	0.464273	0.724	0.421	6.23876e-106	Hs6st2	OFT/AVCm1	Two-sided Wilcoxon test	0.25	25
5.5145e-131	0.46407	0.579	0.32	1.29502e-126	Amot	OFT/AVCm1	Two-sided Wilcoxon test	0.25	25
1.41363e-233	0.464017	0.519	0.182	3.31977e-229	Boc	OFT/AVCm1	Two-sided Wilcoxon test	0.25	25
9.74991e-232	0.463618	0.564	0.214	2.28967e-227	Sdk2	OFT/AVCm1	Two-sided Wilcoxon test	0.25	25
5.34454e-156	0.463424	0.741	0.411	1.25511e-151	Pkdcc	OFT/AVCm1	Two-sided Wilcoxon test	0.25	25
8.43741e-181	0.463289	0.854	0.524	1.98144e-176	Gjc1	OFT/AVCm1	Two-sided Wilcoxon test	0.25	25
6.94972e-173	0.462787	0.97	0.833	1.63207e-168	Sfpq	OFT/AVCm1	Two-sided Wilcoxon test	0.25	25
1.87939e-135	0.462035	0.947	0.87	4.41355e-131	Stmn1	OFT/AVCm1	Two-sided Wilcoxon test	0.25	25
2.7179e-281	0.461712	0.557	0.181	6.38271e-277	Lrig3	OFT/AVCm1	Two-sided Wilcoxon test	0.25	25
1.66629e-164	0.461553	0.886	0.555	3.91311e-160	Mpdz	OFT/AVCm1	Two-sided Wilcoxon test	0.25	25
1.33682e-114	0.461401	0.735	0.444	3.1394e-110	Dock4	OFT/AVCm1	Two-sided Wilcoxon test	0.25	25
2.54241e-241	0.461161	0.429	0.12	5.97059e-237	Bmp5	OFT/AVCm1	Two-sided Wilcoxon test	0.25	25
2.31069e-140	0.46022	0.945	0.668	5.42643e-136	Rbfox2	OFT/AVCm1	Two-sided Wilcoxon test	0.25	25
6.43173e-150	0.458299	0.679	0.337	1.51043e-145	Pdgfc	OFT/AVCm1	Two-sided Wilcoxon test	0.25	25
3.47293e-84	0.457871	0.895	0.688	8.15583e-80	Jun	OFT/AVCm1	Two-sided Wilcoxon test	0.25	25
3.44267e-151	0.456615	0.946	0.714	8.08476e-147	Crebbp	OFT/AVCm1	Two-sided Wilcoxon test	0.25	25
2.46775e-164	0.456325	0.721	0.393	5.79526e-160	Cep112	OFT/AVCm1	Two-sided Wilcoxon test	0.25	25
1.35041e-133	0.455934	0.88	0.602	3.1713e-129	Ptms	OFT/AVCm1	Two-sided Wilcoxon test	0.25	25
3.94584e-182	0.454155	0.725	0.401	9.26642e-178	Foxp4	OFT/AVCm1	Two-sided Wilcoxon test	0.25	25
7.22711e-161	0.453681	0.95	0.769	1.69721e-156	Khdrbs1	OFT/AVCm1	Two-sided Wilcoxon test	0.25	25
5.83212e-136	0.453268	0.923	0.69	1.36962e-131	Rev3l	OFT/AVCm1	Two-sided Wilcoxon test	0.25	25
1.98306e-134	0.451459	0.902	0.629	4.65701e-130	Luzp1	OFT/AVCm1	Two-sided Wilcoxon test	0.25	25
3.48844e-144	0.451107	0.757	0.474	8.19226e-140	Supt3	OFT/AVCm1	Two-sided Wilcoxon test	0.25	25
8.43927e-162	0.45095	0.771	0.443	1.98188e-157	H1fx	OFT/AVCm1	Two-sided Wilcoxon test	0.25	25
4.37114e-130	0.45086	0.963	0.778	1.02652e-125	Arih1	OFT/AVCm1	Two-sided Wilcoxon test	0.25	25
1.13373e-20	0.450686	0.72	0.615	2.66245e-16	Hist1h2ae	OFT/AVCm1	Two-sided Wilcoxon test	0.25	25
7.42996e-195	0.450275	0.643	0.277	1.74485e-190	Prex2	OFT/AVCm1	Two-sided Wilcoxon test	0.25	25
6.07255e-123	0.446125	0.889	0.598	1.42608e-118	Rbp1	OFT/AVCm1	Two-sided Wilcoxon test	0.25	25
2.65774e-112	0.445709	0.51	0.261	6.24145e-108	Samd5	OFT/AVCm1	Two-sided Wilcoxon test	0.25	25
2.15937e-195	0.445593	0.367	0.102	5.07106e-191	Foxf1	OFT/AVCm1	Two-sided Wilcoxon test	0.25	25
2.42378e-129	0.445346	0.508	0.254	5.692e-125	Mlf1	OFT/AVCm1	Two-sided Wilcoxon test	0.25	25
1.09256e-168	0.444724	0.857	0.548	2.56576e-164	Pde7a	OFT/AVCm1	Two-sided Wilcoxon test	0.25	25
3.42206e-133	0.444537	0.995	0.895	8.03637e-129	Grb10	OFT/AVCm1	Two-sided Wilcoxon test	0.25	25
7.75936e-70	0.443499	0.671	0.462	1.82221e-65	Nhsl2	OFT/AVCm1	Two-sided Wilcoxon test	0.25	25
7.93032e-48	0.443282	0.525	0.375	1.86236e-43	Il1rapl1	OFT/AVCm1	Two-sided Wilcoxon test	0.25	25
1.08421e-297	0.441359	0.455	0.113	2.54615e-293	Sned1	OFT/AVCm1	Two-sided Wilcoxon test	0.25	25
2.87951e-134	0.440785	0.873	0.599	6.76224e-130	Sh3bgrl	OFT/AVCm1	Two-sided Wilcoxon test	0.25	25
1.03495e-105	0.440362	0.934	0.69	2.43047e-101	Pde4d	OFT/AVCm1	Two-sided Wilcoxon test	0.25	25
0	0.440247	0.358	0.062	0	Alx1	OFT/AVCm1	Two-sided Wilcoxon test	0.25	25
1.01017e-148	0.439533	0.873	0.52	2.37229e-144	Tcf7l1	OFT/AVCm1	Two-sided Wilcoxon test	0.25	25
3.26815e-126	0.438666	0.939	0.839	7.67493e-122	Nap1l1	OFT/AVCm1	Two-sided Wilcoxon test	0.25	25
1.64778e-153	0.438495	0.73	0.407	3.86965e-149	Usp29	OFT/AVCm1	Two-sided Wilcoxon test	0.25	25
2.26218e-110	0.438308	0.789	0.542	5.3125e-106	Hmgcs1	OFT/AVCm1	Two-sided Wilcoxon test	0.25	25
7.29055e-113	0.437809	0.933	0.621	1.71211e-108	Ptprg	OFT/AVCm1	Two-sided Wilcoxon test	0.25	25
3.16457e-146	0.436988	0.883	0.614	7.43167e-142	Peli1	OFT/AVCm1	Two-sided Wilcoxon test	0.25	25
1.88276e-135	0.436818	0.975	0.799	4.42147e-131	Stag1	OFT/AVCm1	Two-sided Wilcoxon test	0.25	25
5.00947e-98	0.436755	0.644	0.367	1.17642e-93	Mid1	OFT/AVCm1	Two-sided Wilcoxon test	0.25	25
5.43014e-208	0.435624	0.632	0.279	1.27521e-203	Tes	OFT/AVCm1	Two-sided Wilcoxon test	0.25	25
9.23154e-133	0.435018	0.894	0.681	2.16793e-128	Atxn7l3b	OFT/AVCm1	Two-sided Wilcoxon test	0.25	25
3.77451e-151	0.433297	0.365	0.123	8.86405e-147	Gm48742	OFT/AVCm1	Two-sided Wilcoxon test	0.25	25
1.79987e-11	0.432647	0.328	0.262	4.22682e-07	Inpp4b	OFT/AVCm1	Two-sided Wilcoxon test	0.25	25
2.51186e-153	0.431987	0.837	0.517	5.89885e-149	Cblb	OFT/AVCm1	Two-sided Wilcoxon test	0.25	25
1.5148e-126	0.431348	0.926	0.632	3.55735e-122	Trio	OFT/AVCm1	Two-sided Wilcoxon test	0.25	25
2.07774e-51	0.430568	0.376	0.218	4.87937e-47	Clstn2	OFT/AVCm1	Two-sided Wilcoxon test	0.25	25
2.48527e-144	0.430387	0.748	0.448	5.83641e-140	L3mbtl3	OFT/AVCm1	Two-sided Wilcoxon test	0.25	25
1.1247e-49	0.430039	0.551	0.371	2.64124e-45	Tox	OFT/AVCm1	Two-sided Wilcoxon test	0.25	25
6.19706e-146	0.429989	0.853	0.587	1.45532e-141	Tnrc6c	OFT/AVCm1	Two-sided Wilcoxon test	0.25	25
1.36894e-144	0.42989	0.847	0.544	3.21481e-140	Arl5b	OFT/AVCm1	Two-sided Wilcoxon test	0.25	25
2.40171e-115	0.428981	0.859	0.581	5.64018e-111	Nxn	OFT/AVCm1	Two-sided Wilcoxon test	0.25	25
9.81545e-228	0.42896	0.679	0.33	2.30506e-223	Acat2	OFT/AVCm1	Two-sided Wilcoxon test	0.25	25
0	0.428294	0.329	0.027	0	Tbx4	OFT/AVCm1	Two-sided Wilcoxon test	0.25	25
1.41377e-177	0.427223	0.527	0.223	3.32011e-173	Osbpl6	OFT/AVCm1	Two-sided Wilcoxon test	0.25	25
1.2136e-168	0.426357	0.845	0.518	2.85003e-164	Tead2	OFT/AVCm1	Two-sided Wilcoxon test	0.25	25
2.11264e-147	0.424841	0.888	0.593	4.96133e-143	Slc4a7	OFT/AVCm1	Two-sided Wilcoxon test	0.25	25
1.46456e-211	0.424207	0.337	0.08	3.43938e-207	Fendrr	OFT/AVCm1	Two-sided Wilcoxon test	0.25	25
1.32655e-147	0.423894	0.658	0.329	3.11526e-143	Itga9	OFT/AVCm1	Two-sided Wilcoxon test	0.25	25
1.04378e-167	0.423017	0.594	0.253	2.4512e-163	Col23a1	OFT/AVCm1	Two-sided Wilcoxon test	0.25	25
1.78253e-147	0.422043	0.936	0.718	4.1861e-143	Cpsf6	OFT/AVCm1	Two-sided Wilcoxon test	0.25	25
2.22504e-62	0.42176	0.3	0.149	5.22528e-58	Cobl	OFT/AVCm1	Two-sided Wilcoxon test	0.25	25
0	0.421619	0.482	0.104	0	Hoxb4	OFT/AVCm1	Two-sided Wilcoxon test	0.25	25
7.13921e-17	0.421606	0.72	0.632	1.67657e-12	Hist1h2ap	OFT/AVCm1	Two-sided Wilcoxon test	0.25	25
2.79822e-133	0.420984	0.361	0.135	6.57133e-129	Chsy3	OFT/AVCm1	Two-sided Wilcoxon test	0.25	25
1.457e-117	0.419972	0.886	0.643	3.42161e-113	Ifitm2	OFT/AVCm1	Two-sided Wilcoxon test	0.25	25
1.39765e-12	0.418187	0.441	0.376	3.28224e-08	Lrba	OFT/AVCm1	Two-sided Wilcoxon test	0.25	25
3.46968e-138	0.417517	0.931	0.68	8.14819e-134	Chd6	OFT/AVCm1	Two-sided Wilcoxon test	0.25	25
2.02719e-65	0.416727	0.706	0.525	4.76065e-61	Pclaf	OFT/AVCm1	Two-sided Wilcoxon test	0.25	25
1.94207e-147	0.415571	0.651	0.337	4.56075e-143	Fam110b	OFT/AVCm1	Two-sided Wilcoxon test	0.25	25
6.18295e-125	0.415466	0.89	0.678	1.452e-120	Ezh2	OFT/AVCm1	Two-sided Wilcoxon test	0.25	25
1.5537e-147	0.415046	0.798	0.5	3.64872e-143	Kat6b	OFT/AVCm1	Two-sided Wilcoxon test	0.25	25
1.01541e-108	0.412261	0.534	0.27	2.3846e-104	Gria3	OFT/AVCm1	Two-sided Wilcoxon test	0.25	25
6.00963e-203	0.412232	0.423	0.136	1.4113e-198	Srgap3	OFT/AVCm1	Two-sided Wilcoxon test	0.25	25
2.11277e-123	0.41213	0.75	0.42	4.96162e-119	Npas3	OFT/AVCm1	Two-sided Wilcoxon test	0.25	25
7.5276e-133	0.411999	0.928	0.612	1.76778e-128	Dock1	OFT/AVCm1	Two-sided Wilcoxon test	0.25	25
5.8205e-167	0.411508	0.302	0.08	1.36689e-162	Gfra1	OFT/AVCm1	Two-sided Wilcoxon test	0.25	25
1.791e-126	0.409255	0.722	0.464	4.20598e-122	Cyp51	OFT/AVCm1	Two-sided Wilcoxon test	0.25	25
5.75205e-240	0.408931	0.571	0.21	1.35081e-235	Pdgfrb	OFT/AVCm1	Two-sided Wilcoxon test	0.25	25
1.09146e-135	0.408407	0.962	0.778	2.56319e-131	Pum1	OFT/AVCm1	Two-sided Wilcoxon test	0.25	25
1.08266e-124	0.407465	0.899	0.644	2.54252e-120	Ccdc88a	OFT/AVCm1	Two-sided Wilcoxon test	0.25	25
1.46483e-172	0.407037	0.475	0.184	3.44e-168	Rims1	OFT/AVCm1	Two-sided Wilcoxon test	0.25	25
9.15979e-90	0.407026	0.312	0.137	2.15108e-85	Hs3st3b1	OFT/AVCm1	Two-sided Wilcoxon test	0.25	25
2.11485e-136	0.407023	0.874	0.643	4.96652e-132	Ilf2	OFT/AVCm1	Two-sided Wilcoxon test	0.25	25
1.18318e-107	0.406619	0.754	0.503	2.77859e-103	Bcas3	OFT/AVCm1	Two-sided Wilcoxon test	0.25	25
2.47193e-59	0.406316	0.549	0.362	5.80508e-55	Macrod2	OFT/AVCm1	Two-sided Wilcoxon test	0.25	25
1.434e-76	0.405522	0.975	0.778	3.3676e-72	Magi1	OFT/AVCm1	Two-sided Wilcoxon test	0.25	25
1.49237e-222	0.405424	0.615	0.268	3.50469e-218	Rnf144a	OFT/AVCm1	Two-sided Wilcoxon test	0.25	25
1.06264e-34	0.405085	0.729	0.639	2.49551e-30	Zeb2	OFT/AVCm1	Two-sided Wilcoxon test	0.25	25
6.37867e-133	0.40412	0.872	0.561	1.49797e-128	Myo1b	OFT/AVCm1	Two-sided Wilcoxon test	0.25	25
7.50317e-132	0.404073	0.427	0.187	1.76205e-127	Tnfrsf19	OFT/AVCm1	Two-sided Wilcoxon test	0.25	25
7.03393e-142	0.403784	0.731	0.437	1.65185e-137	Scai	OFT/AVCm1	Two-sided Wilcoxon test	0.25	25
1.07944e-111	0.403462	0.736	0.409	2.53495e-107	Fras1	OFT/AVCm1	Two-sided Wilcoxon test	0.25	25
4.9907e-233	0.403401	0.412	0.122	1.17202e-228	Tril	OFT/AVCm1	Two-sided Wilcoxon test	0.25	25
2.41479e-130	0.403071	0.911	0.684	5.6709e-126	Pds5b	OFT/AVCm1	Two-sided Wilcoxon test	0.25	25
1.19133e-80	0.402446	0.27	0.112	2.79773e-76	C1qtnf7	OFT/AVCm1	Two-sided Wilcoxon test	0.25	25
5.45487e-82	0.402253	0.467	0.245	1.28102e-77	Ntm	OFT/AVCm1	Two-sided Wilcoxon test	0.25	25
3.95392e-74	0.400177	0.957	0.863	9.28538e-70	Jund	OFT/AVCm1	Two-sided Wilcoxon test	0.25	25
1.75512e-124	0.398705	0.849	0.502	4.12173e-120	Col5a2	OFT/AVCm1	Two-sided Wilcoxon test	0.25	25
8.42827e-126	0.398628	0.931	0.692	1.9793e-121	Tnrc6a	OFT/AVCm1	Two-sided Wilcoxon test	0.25	25
8.86133e-126	0.397984	0.933	0.656	2.08099e-121	Bmpr1a	OFT/AVCm1	Two-sided Wilcoxon test	0.25	25
7.0093e-155	0.397929	0.565	0.243	1.64606e-150	Ldb2	OFT/AVCm1	Two-sided Wilcoxon test	0.25	25
5.26387e-125	0.397465	0.603	0.316	1.23617e-120	Sncaip	OFT/AVCm1	Two-sided Wilcoxon test	0.25	25
2.1861e-138	0.395339	0.919	0.714	5.13384e-134	Smarce1	OFT/AVCm1	Two-sided Wilcoxon test	0.25	25
2.57651e-106	0.395325	0.947	0.762	6.05067e-102	Ywhaz	OFT/AVCm1	Two-sided Wilcoxon test	0.25	25
3.00834e-113	0.394968	0.955	0.669	7.06478e-109	Pard3	OFT/AVCm1	Two-sided Wilcoxon test	0.25	25
3.30482e-128	0.39495	0.931	0.724	7.76103e-124	Adnp	OFT/AVCm1	Two-sided Wilcoxon test	0.25	25
5.32299e-139	0.394432	0.842	0.576	1.25005e-134	Tia1	OFT/AVCm1	Two-sided Wilcoxon test	0.25	25
3.42954e-113	0.392469	0.954	0.694	8.05393e-109	Map4k4	OFT/AVCm1	Two-sided Wilcoxon test	0.25	25
1.3534e-119	0.392078	0.562	0.275	3.17832e-115	Bmpr1b	OFT/AVCm1	Two-sided Wilcoxon test	0.25	25
4.95059e-125	0.391352	0.933	0.677	1.1626e-120	Nf1	OFT/AVCm1	Two-sided Wilcoxon test	0.25	25
9.04064e-127	0.390804	0.956	0.802	2.1231e-122	Fubp1	OFT/AVCm1	Two-sided Wilcoxon test	0.25	25
1.94433e-118	0.390132	0.266	0.088	4.56608e-114	Tmem158	OFT/AVCm1	Two-sided Wilcoxon test	0.25	25
1.01297e-133	0.390131	0.946	0.65	2.37886e-129	Enah	OFT/AVCm1	Two-sided Wilcoxon test	0.25	25
6.05489e-132	0.389981	0.95	0.7	1.42193e-127	Eml4	OFT/AVCm1	Two-sided Wilcoxon test	0.25	25
1.28817e-94	0.38764	0.979	0.733	3.02513e-90	Lpp	OFT/AVCm1	Two-sided Wilcoxon test	0.25	25
6.86884e-126	0.387512	0.892	0.631	1.61308e-121	Trim33	OFT/AVCm1	Two-sided Wilcoxon test	0.25	25
2.18028e-120	0.387332	0.914	0.652	5.12017e-116	Phf14	OFT/AVCm1	Two-sided Wilcoxon test	0.25	25
1.19143e-98	0.387201	0.872	0.553	2.79796e-94	Cdh2	OFT/AVCm1	Two-sided Wilcoxon test	0.25	25
5.04353e-123	0.386966	0.921	0.669	1.18442e-118	Fbxo11	OFT/AVCm1	Two-sided Wilcoxon test	0.25	25
3.77209e-93	0.38626	0.843	0.624	8.85838e-89	Lcorl	OFT/AVCm1	Two-sided Wilcoxon test	0.25	25
7.35645e-160	0.385969	0.821	0.48	1.72759e-155	Dbn1	OFT/AVCm1	Two-sided Wilcoxon test	0.25	25
3.36091e-126	0.383733	0.638	0.353	7.89275e-122	Kctd1	OFT/AVCm1	Two-sided Wilcoxon test	0.25	25
9.26746e-154	0.382467	0.841	0.582	2.17637e-149	Hnrnph3	OFT/AVCm1	Two-sided Wilcoxon test	0.25	25
1.35399e-130	0.38229	0.824	0.556	3.17971e-126	Tcf20	OFT/AVCm1	Two-sided Wilcoxon test	0.25	25
6.74044e-68	0.382259	0.9	0.674	1.58292e-63	Zbtb20	OFT/AVCm1	Two-sided Wilcoxon test	0.25	25
3.52439e-130	0.381809	0.953	0.851	8.27668e-126	Hnrnpa1	OFT/AVCm1	Two-sided Wilcoxon test	0.25	25
2.37235e-143	0.381765	0.987	0.899	5.57124e-139	Rbm39	OFT/AVCm1	Two-sided Wilcoxon test	0.25	25
1.55783e-120	0.380604	0.822	0.563	3.6584e-116	Klhdc10	OFT/AVCm1	Two-sided Wilcoxon test	0.25	25
2.81276e-128	0.379986	0.85	0.57	6.60549e-124	Pdcd4	OFT/AVCm1	Two-sided Wilcoxon test	0.25	25
2.19064e-97	0.379863	0.755	0.471	5.14451e-93	Ank3	OFT/AVCm1	Two-sided Wilcoxon test	0.25	25
4.46987e-141	0.379751	0.716	0.421	1.0497e-136	Notch2	OFT/AVCm1	Two-sided Wilcoxon test	0.25	25
3.1188e-87	0.379234	0.769	0.538	7.3242e-83	Dtl	OFT/AVCm1	Two-sided Wilcoxon test	0.25	25
9.39746e-265	0.378182	0.579	0.204	2.2069e-260	Rimklb	OFT/AVCm1	Two-sided Wilcoxon test	0.25	25
1.43726e-132	0.377813	0.831	0.543	3.37526e-128	Cbfb	OFT/AVCm1	Two-sided Wilcoxon test	0.25	25
3.07997e-108	0.377688	0.941	0.681	7.233e-104	Gnaq	OFT/AVCm1	Two-sided Wilcoxon test	0.25	25
3.08899e-90	0.377531	0.631	0.384	7.25418e-86	Pls3	OFT/AVCm1	Two-sided Wilcoxon test	0.25	25
6.1565e-107	0.377511	0.867	0.639	1.44579e-102	Asxl1	OFT/AVCm1	Two-sided Wilcoxon test	0.25	25
8.84308e-156	0.377195	0.812	0.491	2.07671e-151	Ptprs	OFT/AVCm1	Two-sided Wilcoxon test	0.25	25
1.28054e-116	0.376123	0.905	0.661	3.00723e-112	Rsf1	OFT/AVCm1	Two-sided Wilcoxon test	0.25	25
4.27415e-100	0.376088	0.339	0.142	1.00374e-95	Dpyd	OFT/AVCm1	Two-sided Wilcoxon test	0.25	25
1.42168e-181	0.37603	0.773	0.41	3.33867e-177	Fzd2	OFT/AVCm1	Two-sided Wilcoxon test	0.25	25
8.06459e-186	0.375974	0.606	0.27	1.89389e-181	Dact1	OFT/AVCm1	Two-sided Wilcoxon test	0.25	25
3.05837e-111	0.375968	0.95	0.731	7.18226e-107	Zfp292	OFT/AVCm1	Two-sided Wilcoxon test	0.25	25
6.33035e-171	0.375032	0.422	0.154	1.48662e-166	Crispld1	OFT/AVCm1	Two-sided Wilcoxon test	0.25	25
3.33809e-149	0.374883	0.75	0.455	7.83916e-145	Iqcb1	OFT/AVCm1	Two-sided Wilcoxon test	0.25	25
5.76879e-127	0.37487	0.866	0.609	1.35474e-122	Smurf2	OFT/AVCm1	Two-sided Wilcoxon test	0.25	25
1.63144e-140	0.3748	0.78	0.458	3.83126e-136	Nrep	OFT/AVCm1	Two-sided Wilcoxon test	0.25	25
2.71775e-120	0.373688	0.951	0.741	6.38236e-116	Tbl1x	OFT/AVCm1	Two-sided Wilcoxon test	0.25	25
2.28985e-93	0.373186	0.761	0.467	5.37749e-89	Cacna2d1	OFT/AVCm1	Two-sided Wilcoxon test	0.25	25
3.10676e-149	0.372253	0.754	0.464	7.29592e-145	Dcakd	OFT/AVCm1	Two-sided Wilcoxon test	0.25	25
6.55467e-142	0.371493	0.775	0.479	1.5393e-137	Kifap3	OFT/AVCm1	Two-sided Wilcoxon test	0.25	25
1.14718e-151	0.371259	0.766	0.452	2.69403e-147	Smo	OFT/AVCm1	Two-sided Wilcoxon test	0.25	25
4.81777e-142	0.37058	0.867	0.57	1.13141e-137	Zfp266	OFT/AVCm1	Two-sided Wilcoxon test	0.25	25
1.25834e-135	0.370527	0.643	0.343	2.95509e-131	Myo1e	OFT/AVCm1	Two-sided Wilcoxon test	0.25	25
1.10179e-125	0.370425	0.503	0.25	2.58745e-121	Gas2	OFT/AVCm1	Two-sided Wilcoxon test	0.25	25
1.20913e-143	0.370329	0.763	0.455	2.83952e-139	Tnrc18	OFT/AVCm1	Two-sided Wilcoxon test	0.25	25
1.79528e-76	0.370145	0.777	0.506	4.21603e-72	Sox5	OFT/AVCm1	Two-sided Wilcoxon test	0.25	25
5.15625e-100	0.370116	0.957	0.875	1.21089e-95	Set	OFT/AVCm1	Two-sided Wilcoxon test	0.25	25
4.05846e-70	0.370087	0.988	0.969	9.53089e-66	H2afz	OFT/AVCm1	Two-sided Wilcoxon test	0.25	25
4.15733e-184	0.370057	0.636	0.295	9.76307e-180	Mrc2	OFT/AVCm1	Two-sided Wilcoxon test	0.25	25
1.2954e-147	0.369649	0.651	0.358	3.04212e-143	Ldlrad3	OFT/AVCm1	Two-sided Wilcoxon test	0.25	25
3.98999e-96	0.369623	0.914	0.632	9.37009e-92	Nbea	OFT/AVCm1	Two-sided Wilcoxon test	0.25	25
1.88664e-128	0.368496	0.813	0.556	4.43059e-124	Ylpm1	OFT/AVCm1	Two-sided Wilcoxon test	0.25	25
8.84706e-104	0.368369	0.925	0.688	2.07764e-99	Igf2bp3	OFT/AVCm1	Two-sided Wilcoxon test	0.25	25
1.67306e-104	0.368347	0.91	0.706	3.92902e-100	Tra2a	OFT/AVCm1	Two-sided Wilcoxon test	0.25	25
8.48857e-148	0.368057	0.787	0.45	1.99346e-143	Cd24a	OFT/AVCm1	Two-sided Wilcoxon test	0.25	25
1.70092e-138	0.367404	0.765	0.458	3.99444e-134	Fbln1	OFT/AVCm1	Two-sided Wilcoxon test	0.25	25
1.63781e-131	0.366186	0.761	0.443	3.84624e-127	Dennd2a	OFT/AVCm1	Two-sided Wilcoxon test	0.25	25
1.29649e-107	0.365423	0.889	0.673	3.04467e-103	Kmt2e	OFT/AVCm1	Two-sided Wilcoxon test	0.25	25
8.28445e-117	0.364554	0.94	0.754	1.94552e-112	Sumo1	OFT/AVCm1	Two-sided Wilcoxon test	0.25	25
3.65577e-118	0.364503	0.711	0.431	8.58522e-114	Cntln	OFT/AVCm1	Two-sided Wilcoxon test	0.25	25
3.60337e-126	0.364344	0.861	0.594	8.46215e-122	Ptov1	OFT/AVCm1	Two-sided Wilcoxon test	0.25	25
1.55157e-154	0.364268	0.759	0.435	3.6437e-150	Gm1673	OFT/AVCm1	Two-sided Wilcoxon test	0.25	25
1.85051e-115	0.364143	0.923	0.702	4.34573e-111	Arid1a	OFT/AVCm1	Two-sided Wilcoxon test	0.25	25
9.82608e-127	0.363808	0.805	0.506	2.30756e-122	Zfp827	OFT/AVCm1	Two-sided Wilcoxon test	0.25	25
4.55936e-117	0.36241	0.801	0.538	1.07072e-112	Cbfa2t2	OFT/AVCm1	Two-sided Wilcoxon test	0.25	25
4.83007e-84	0.36228	0.641	0.39	1.13429e-79	Cadm1	OFT/AVCm1	Two-sided Wilcoxon test	0.25	25
3.68344e-105	0.361431	0.877	0.62	8.65018e-101	Fto	OFT/AVCm1	Two-sided Wilcoxon test	0.25	25
1.38448e-144	0.360862	0.309	0.094	3.25132e-140	Rerg	OFT/AVCm1	Two-sided Wilcoxon test	0.25	25
2.07584e-106	0.360739	0.889	0.691	4.8749e-102	Baz1b	OFT/AVCm1	Two-sided Wilcoxon test	0.25	25
1.2369e-160	0.360562	0.756	0.441	2.90472e-156	Serf1	OFT/AVCm1	Two-sided Wilcoxon test	0.25	25
3.46106e-127	0.360509	0.774	0.481	8.12795e-123	Znrf3	OFT/AVCm1	Two-sided Wilcoxon test	0.25	25
5.40668e-116	0.360299	0.794	0.532	1.2697e-111	Acaca	OFT/AVCm1	Two-sided Wilcoxon test	0.25	25
9.67905e-130	0.359919	0.766	0.438	2.27303e-125	Kirrel	OFT/AVCm1	Two-sided Wilcoxon test	0.25	25
1.60509e-103	0.359682	0.987	0.785	3.7694e-99	Rere	OFT/AVCm1	Two-sided Wilcoxon test	0.25	25
1.24389e-200	0.359416	0.592	0.259	2.92115e-196	Mex3b	OFT/AVCm1	Two-sided Wilcoxon test	0.25	25
4.03301e-103	0.359067	0.969	0.778	9.47112e-99	Gsk3b	OFT/AVCm1	Two-sided Wilcoxon test	0.25	25
7.12712e-93	0.35847	0.923	0.641	1.67373e-88	Cnn3	OFT/AVCm1	Two-sided Wilcoxon test	0.25	25
6.80344e-100	0.356915	0.909	0.669	1.59772e-95	Tsc22d1	OFT/AVCm1	Two-sided Wilcoxon test	0.25	25
3.91668e-84	0.356889	0.503	0.293	9.19793e-80	Wnt5a	OFT/AVCm1	Two-sided Wilcoxon test	0.25	25
6.62877e-96	0.35674	0.357	0.164	1.5567e-91	Kctd12	OFT/AVCm1	Two-sided Wilcoxon test	0.25	25
8.66898e-90	0.35649	0.825	0.541	2.03582e-85	Arid5b	OFT/AVCm1	Two-sided Wilcoxon test	0.25	25
1.58741e-108	0.356463	0.761	0.51	3.72787e-104	Atp11c	OFT/AVCm1	Two-sided Wilcoxon test	0.25	25
2.44739e-120	0.356313	0.952	0.901	5.74746e-116	Sumo2	OFT/AVCm1	Two-sided Wilcoxon test	0.25	25
7.25401e-98	0.355759	0.914	0.67	1.70353e-93	Maged1	OFT/AVCm1	Two-sided Wilcoxon test	0.25	25
3.06778e-146	0.355724	0.729	0.448	7.20438e-142	Phf6	OFT/AVCm1	Two-sided Wilcoxon test	0.25	25
1.07978e-133	0.354546	0.723	0.444	2.53575e-129	Ric1	OFT/AVCm1	Two-sided Wilcoxon test	0.25	25
1.94987e-113	0.35436	0.91	0.677	4.57906e-109	Cnot2	OFT/AVCm1	Two-sided Wilcoxon test	0.25	25
4.73014e-166	0.353788	0.322	0.094	1.11083e-161	Sparcl1	OFT/AVCm1	Two-sided Wilcoxon test	0.25	25
1.58826e-105	0.353298	0.94	0.822	3.72987e-101	Hnrnpd	OFT/AVCm1	Two-sided Wilcoxon test	0.25	25
2.66337e-182	0.353172	0.692	0.364	6.25466e-178	Ift74	OFT/AVCm1	Two-sided Wilcoxon test	0.25	25
3.90249e-215	0.352354	0.576	0.235	9.16461e-211	Dzip1	OFT/AVCm1	Two-sided Wilcoxon test	0.25	25
2.28905e-100	0.351966	0.927	0.738	5.37561e-96	Phip	OFT/AVCm1	Two-sided Wilcoxon test	0.25	25
5.0752e-91	0.35185	0.927	0.818	1.19186e-86	Snrpg	OFT/AVCm1	Two-sided Wilcoxon test	0.25	25
1.8878e-92	0.35131	0.942	0.84	4.43331e-88	Hmgn1	OFT/AVCm1	Two-sided Wilcoxon test	0.25	25
1.44226e-141	0.351288	0.777	0.468	3.38699e-137	Tmeff1	OFT/AVCm1	Two-sided Wilcoxon test	0.25	25
3.02507e-107	0.351194	0.877	0.632	7.10406e-103	Mbtd1	OFT/AVCm1	Two-sided Wilcoxon test	0.25	25
4.12212e-140	0.350762	0.798	0.494	9.68039e-136	Bcl9	OFT/AVCm1	Two-sided Wilcoxon test	0.25	25
1.86072e-118	0.350165	0.906	0.651	4.36972e-114	Zmym4	OFT/AVCm1	Two-sided Wilcoxon test	0.25	25
1.26021e-191	0.349821	0.334	0.089	2.95947e-187	B130024G19Rik	OFT/AVCm1	Two-sided Wilcoxon test	0.25	25
1.49953e-128	0.349143	0.277	0.087	3.5215e-124	Adcy2	OFT/AVCm1	Two-sided Wilcoxon test	0.25	25
4.88307e-110	0.348405	0.819	0.543	1.14674e-105	Fam168a	OFT/AVCm1	Two-sided Wilcoxon test	0.25	25
5.51212e-75	0.347785	0.838	0.544	1.29447e-70	Phldb2	OFT/AVCm1	Two-sided Wilcoxon test	0.25	25
4.06855e-140	0.347589	0.808	0.512	9.55457e-136	Arhgap35	OFT/AVCm1	Two-sided Wilcoxon test	0.25	25
5.43329e-111	0.347441	0.926	0.69	1.27595e-106	Ehmt1	OFT/AVCm1	Two-sided Wilcoxon test	0.25	25
1.17431e-102	0.346743	0.935	0.75	2.75776e-98	Pcm1	OFT/AVCm1	Two-sided Wilcoxon test	0.25	25
1.29966e-110	0.346524	0.869	0.629	3.05213e-106	Med13	OFT/AVCm1	Two-sided Wilcoxon test	0.25	25
1.0233e-67	0.346384	0.932	0.67	2.40312e-63	Mir99ahg	OFT/AVCm1	Two-sided Wilcoxon test	0.25	25
3.52243e-68	0.346258	0.807	0.597	8.27207e-64	Igfbp5	OFT/AVCm1	Two-sided Wilcoxon test	0.25	25
6.49422e-104	0.345997	0.691	0.394	1.5251e-99	Pde3a	OFT/AVCm1	Two-sided Wilcoxon test	0.25	25
6.11165e-89	0.345958	0.811	0.563	1.43526e-84	Smyd3	OFT/AVCm1	Two-sided Wilcoxon test	0.25	25
2.07464e-112	0.345798	0.444	0.211	4.87209e-108	Adamts12	OFT/AVCm1	Two-sided Wilcoxon test	0.25	25
2.17069e-148	0.345431	0.723	0.442	5.09765e-144	Vezf1	OFT/AVCm1	Two-sided Wilcoxon test	0.25	25
1.8273e-98	0.344728	0.984	0.971	4.29123e-94	Npm1	OFT/AVCm1	Two-sided Wilcoxon test	0.25	25
2.11041e-102	0.34366	0.92	0.65	4.95608e-98	Bmpr2	OFT/AVCm1	Two-sided Wilcoxon test	0.25	25
3.24172e-187	0.342868	0.277	0.062	7.61285e-183	Tmem200a	OFT/AVCm1	Two-sided Wilcoxon test	0.25	25
1.45012e-147	0.34256	0.746	0.456	3.40546e-143	Trp53bp1	OFT/AVCm1	Two-sided Wilcoxon test	0.25	25
9.97998e-136	0.342494	0.472	0.202	2.3437e-131	Gm14582	OFT/AVCm1	Two-sided Wilcoxon test	0.25	25
1.91552e-102	0.342473	0.974	0.835	4.49841e-98	Prrc2c	OFT/AVCm1	Two-sided Wilcoxon test	0.25	25
4.01758e-161	0.342422	0.693	0.374	9.43489e-157	Mthfd2l	OFT/AVCm1	Two-sided Wilcoxon test	0.25	25
1.57897e-122	0.342269	0.963	0.866	3.70805e-118	Hnrnpc	OFT/AVCm1	Two-sided Wilcoxon test	0.25	25
1.80596e-141	0.342125	0.771	0.487	4.24113e-137	Spin1	OFT/AVCm1	Two-sided Wilcoxon test	0.25	25
9.61355e-92	0.341995	0.995	0.983	2.25765e-87	Rps15a	OFT/AVCm1	Two-sided Wilcoxon test	0.25	25
2.53905e-261	0.341893	0.446	0.12	5.96271e-257	Dnm3os	OFT/AVCm1	Two-sided Wilcoxon test	0.25	25
1.00169e-113	0.341732	0.877	0.622	2.35237e-109	Tspan3	OFT/AVCm1	Two-sided Wilcoxon test	0.25	25
1.83949e-118	0.34139	0.845	0.591	4.31985e-114	Zfp326	OFT/AVCm1	Two-sided Wilcoxon test	0.25	25
1.0984e-134	0.341107	0.733	0.442	2.57949e-130	Gtf2ird1	OFT/AVCm1	Two-sided Wilcoxon test	0.25	25
2.21119e-192	0.340769	0.41	0.137	5.19277e-188	Tpbg	OFT/AVCm1	Two-sided Wilcoxon test	0.25	25
5.9974e-99	0.340639	0.924	0.739	1.40843e-94	Top2b	OFT/AVCm1	Two-sided Wilcoxon test	0.25	25
1.45143e-74	0.340227	0.924	0.681	3.40854e-70	Fstl1	OFT/AVCm1	Two-sided Wilcoxon test	0.25	25
3.87063e-178	0.339859	0.588	0.257	9.08978e-174	Arnt2	OFT/AVCm1	Two-sided Wilcoxon test	0.25	25
1.73529e-21	0.338951	0.267	0.172	4.07516e-17	Grid2	OFT/AVCm1	Two-sided Wilcoxon test	0.25	25
5.84932e-82	0.338716	0.907	0.751	1.37365e-77	Cdk4	OFT/AVCm1	Two-sided Wilcoxon test	0.25	25
2.06509e-99	0.338496	0.913	0.66	4.84965e-95	Wdfy3	OFT/AVCm1	Two-sided Wilcoxon test	0.25	25
1.79892e-185	0.338102	0.596	0.272	4.22458e-181	Pard6g	OFT/AVCm1	Two-sided Wilcoxon test	0.25	25
1.64182e-103	0.337931	0.916	0.731	3.85565e-99	Srsf10	OFT/AVCm1	Two-sided Wilcoxon test	0.25	25
2.26918e-101	0.337247	0.907	0.697	5.32895e-97	Ube2r2	OFT/AVCm1	Two-sided Wilcoxon test	0.25	25
1.00356e-111	0.336176	0.791	0.498	2.35677e-107	Gm4258	OFT/AVCm1	Two-sided Wilcoxon test	0.25	25
2.75774e-81	0.336016	0.976	0.75	6.47628e-77	Ext1	OFT/AVCm1	Two-sided Wilcoxon test	0.25	25
2.51206e-104	0.334064	0.731	0.469	5.89931e-100	Tiam1	OFT/AVCm1	Two-sided Wilcoxon test	0.25	25
2.91288e-97	0.333775	0.947	0.788	6.84061e-93	Thrap3	OFT/AVCm1	Two-sided Wilcoxon test	0.25	25
2.09032e-84	0.33353	0.948	0.756	4.9089e-80	Nktr	OFT/AVCm1	Two-sided Wilcoxon test	0.25	25
1.6395e-102	0.333519	0.971	0.916	3.85021e-98	Srsf3	OFT/AVCm1	Two-sided Wilcoxon test	0.25	25
1.67395e-96	0.333173	0.848	0.585	3.9311e-92	Rapgef2	OFT/AVCm1	Two-sided Wilcoxon test	0.25	25
3.23105e-96	0.33283	0.973	0.82	7.58779e-92	Atrx	OFT/AVCm1	Two-sided Wilcoxon test	0.25	25
1.7565e-93	0.332401	0.919	0.763	4.12497e-89	Supt16	OFT/AVCm1	Two-sided Wilcoxon test	0.25	25
2.13519e-103	0.332329	0.867	0.619	5.01428e-99	Zmynd11	OFT/AVCm1	Two-sided Wilcoxon test	0.25	25
1.2599e-110	0.331569	0.9	0.574	2.95875e-106	Neo1	OFT/AVCm1	Two-sided Wilcoxon test	0.25	25
1.25863e-99	0.331481	0.92	0.716	2.95577e-95	Acin1	OFT/AVCm1	Two-sided Wilcoxon test	0.25	25
1.15201e-104	0.331259	0.865	0.634	2.70537e-100	Arid2	OFT/AVCm1	Two-sided Wilcoxon test	0.25	25
4.48492e-117	0.33124	0.415	0.186	1.05324e-112	Mob3b	OFT/AVCm1	Two-sided Wilcoxon test	0.25	25
4.60501e-93	0.330744	0.958	0.79	1.08144e-88	Gnb1	OFT/AVCm1	Two-sided Wilcoxon test	0.25	25
4.44207e-106	0.330107	0.698	0.419	1.04318e-101	Parp8	OFT/AVCm1	Two-sided Wilcoxon test	0.25	25
1.2922e-99	0.330071	0.902	0.624	3.03459e-95	Dip2c	OFT/AVCm1	Two-sided Wilcoxon test	0.25	25
3.32408e-127	0.329919	0.691	0.413	7.80626e-123	Dync2h1	OFT/AVCm1	Two-sided Wilcoxon test	0.25	25
1.40835e-107	0.32979	0.658	0.395	3.30738e-103	Smarca2	OFT/AVCm1	Two-sided Wilcoxon test	0.25	25
4.46881e-80	0.328181	0.888	0.679	1.04946e-75	Jarid2	OFT/AVCm1	Two-sided Wilcoxon test	0.25	25
7.88923e-87	0.327933	0.938	0.709	1.85271e-82	Setd5	OFT/AVCm1	Two-sided Wilcoxon test	0.25	25
2.02519e-110	0.327606	0.844	0.599	4.75595e-106	Pafah1b3	OFT/AVCm1	Two-sided Wilcoxon test	0.25	25
1.93866e-105	0.32722	0.893	0.603	4.55276e-101	Sbf2	OFT/AVCm1	Two-sided Wilcoxon test	0.25	25
2.3654e-105	0.32713	0.404	0.175	5.5549e-101	Pgm5	OFT/AVCm1	Two-sided Wilcoxon test	0.25	25
6.06546e-75	0.326713	0.926	0.804	1.42441e-70	Hnrnpab	OFT/AVCm1	Two-sided Wilcoxon test	0.25	25
2.89693e-112	0.326528	0.85	0.613	6.80315e-108	Rtf1	OFT/AVCm1	Two-sided Wilcoxon test	0.25	25
3.23579e-106	0.326377	0.833	0.591	7.59894e-102	Mtf2	OFT/AVCm1	Two-sided Wilcoxon test	0.25	25
1.66529e-97	0.326227	0.903	0.741	3.91077e-93	Psip1	OFT/AVCm1	Two-sided Wilcoxon test	0.25	25
1.07102e-90	0.325982	0.922	0.707	2.51519e-86	Tnpo1	OFT/AVCm1	Two-sided Wilcoxon test	0.25	25
3.04964e-133	0.324773	0.624	0.342	7.16177e-129	1110051M20Rik	OFT/AVCm1	Two-sided Wilcoxon test	0.25	25
8.53043e-90	0.324734	0.951	0.76	2.00329e-85	Nipbl	OFT/AVCm1	Two-sided Wilcoxon test	0.25	25
1.37262e-288	0.324429	0.416	0.097	3.22347e-284	Tmem119	OFT/AVCm1	Two-sided Wilcoxon test	0.25	25
9.58077e-276	0.324006	0.477	0.135	2.24995e-271	Hoxb2	OFT/AVCm1	Two-sided Wilcoxon test	0.25	25
5.06026e-150	0.323637	0.554	0.266	1.18835e-145	Rps6ka6	OFT/AVCm1	Two-sided Wilcoxon test	0.25	25
3.91373e-104	0.323609	0.965	0.834	9.191e-100	Hnrnpm	OFT/AVCm1	Two-sided Wilcoxon test	0.25	25
2.45128e-57	0.323198	0.609	0.387	5.75659e-53	Plcb1	OFT/AVCm1	Two-sided Wilcoxon test	0.25	25
1.17345e-98	0.32232	0.913	0.71	2.75572e-94	Pnisr	OFT/AVCm1	Two-sided Wilcoxon test	0.25	25
1.88426e-104	0.321921	0.88	0.654	4.425e-100	Mettl9	OFT/AVCm1	Two-sided Wilcoxon test	0.25	25
8.91514e-117	0.321834	0.712	0.422	2.09363e-112	Myo10	OFT/AVCm1	Two-sided Wilcoxon test	0.25	25
5.74436e-85	0.321191	0.9	0.763	1.34901e-80	Pfdn5	OFT/AVCm1	Two-sided Wilcoxon test	0.25	25
5.43448e-98	0.320592	0.722	0.444	1.27623e-93	Lima1	OFT/AVCm1	Two-sided Wilcoxon test	0.25	25
1.02092e-49	0.320575	0.775	0.611	2.39753e-45	H2afx	OFT/AVCm1	Two-sided Wilcoxon test	0.25	25
1.62506e-91	0.31997	0.95	0.809	3.81628e-87	Caprin1	OFT/AVCm1	Two-sided Wilcoxon test	0.25	25
9.53051e-91	0.319566	0.91	0.692	2.23814e-86	Smg6	OFT/AVCm1	Two-sided Wilcoxon test	0.25	25
6.4203e-95	0.319555	0.883	0.645	1.50774e-90	Usp3	OFT/AVCm1	Two-sided Wilcoxon test	0.25	25
1.12178e-112	0.319358	0.77	0.508	2.63438e-108	Mapk8	OFT/AVCm1	Two-sided Wilcoxon test	0.25	25
6e-126	0.318609	0.748	0.477	1.40904e-121	Gstm5	OFT/AVCm1	Two-sided Wilcoxon test	0.25	25
6.62832e-127	0.318021	0.491	0.223	1.55659e-122	Cnksr2	OFT/AVCm1	Two-sided Wilcoxon test	0.25	25
4.47975e-113	0.317214	0.793	0.512	1.05202e-108	Zfyve9	OFT/AVCm1	Two-sided Wilcoxon test	0.25	25
6.80223e-102	0.316847	0.768	0.504	1.59744e-97	Dis3l2	OFT/AVCm1	Two-sided Wilcoxon test	0.25	25
4.14038e-63	0.316742	0.879	0.666	9.72326e-59	Vcl	OFT/AVCm1	Two-sided Wilcoxon test	0.25	25
1.02212e-110	0.316547	0.703	0.44	2.40034e-106	Kansl1l	OFT/AVCm1	Two-sided Wilcoxon test	0.25	25
3.02302e-84	0.316275	0.985	0.954	7.09926e-80	H3f3b	OFT/AVCm1	Two-sided Wilcoxon test	0.25	25
2.59005e-115	0.316018	0.679	0.396	6.08248e-111	Ptk7	OFT/AVCm1	Two-sided Wilcoxon test	0.25	25
1.82801e-89	0.315848	0.884	0.71	4.2929e-85	Hmgb3	OFT/AVCm1	Two-sided Wilcoxon test	0.25	25
1.12999e-72	0.315746	0.889	0.722	2.65367e-68	Tmpo	OFT/AVCm1	Two-sided Wilcoxon test	0.25	25
5.88897e-91	0.315709	0.859	0.571	1.38296e-86	Sox4	OFT/AVCm1	Two-sided Wilcoxon test	0.25	25
1.78279e-88	0.314481	0.948	0.782	4.18671e-84	Tra2b	OFT/AVCm1	Two-sided Wilcoxon test	0.25	25
9.88783e-148	0.313774	0.478	0.208	2.32206e-143	Il17rd	OFT/AVCm1	Two-sided Wilcoxon test	0.25	25
1.29805e-90	0.313665	0.939	0.764	3.04835e-86	Hnrnph1	OFT/AVCm1	Two-sided Wilcoxon test	0.25	25
1.58644e-97	0.313598	0.865	0.589	3.7256e-93	Exoc6b	OFT/AVCm1	Two-sided Wilcoxon test	0.25	25
2.6699e-99	0.313375	0.847	0.615	6.26999e-95	Ctdspl2	OFT/AVCm1	Two-sided Wilcoxon test	0.25	25
1.07677e-139	0.312509	0.573	0.276	2.52868e-135	Carmil1	OFT/AVCm1	Two-sided Wilcoxon test	0.25	25
1.1366e-30	0.31249	0.326	0.211	2.66918e-26	Dock10	OFT/AVCm1	Two-sided Wilcoxon test	0.25	25
2.3174e-222	0.312395	0.258	0.042	5.44218e-218	Tmem132cos	OFT/AVCm1	Two-sided Wilcoxon test	0.25	25
4.15225e-50	0.311482	0.523	0.352	9.75114e-46	Pag1	OFT/AVCm1	Two-sided Wilcoxon test	0.25	25
1.53e-105	0.31133	0.625	0.358	3.59305e-101	C530008M17Rik	OFT/AVCm1	Two-sided Wilcoxon test	0.25	25
1.65916e-88	0.311265	0.838	0.587	3.89636e-84	Scmh1	OFT/AVCm1	Two-sided Wilcoxon test	0.25	25
3.34991e-91	0.31122	0.835	0.557	7.86694e-87	Fchsd2	OFT/AVCm1	Two-sided Wilcoxon test	0.25	25
1.61089e-94	0.310801	0.828	0.597	3.78302e-90	Fam193a	OFT/AVCm1	Two-sided Wilcoxon test	0.25	25
4.62257e-79	0.310674	0.924	0.72	1.08557e-74	Zfp644	OFT/AVCm1	Two-sided Wilcoxon test	0.25	25
3.86697e-81	0.310641	0.934	0.774	9.08119e-77	Ddx39b	OFT/AVCm1	Two-sided Wilcoxon test	0.25	25
1.77195e-112	0.310376	0.982	0.972	4.16125e-108	H3f3a	OFT/AVCm1	Two-sided Wilcoxon test	0.25	25
8.93591e-91	0.309565	0.894	0.666	2.09851e-86	Nsmce2	OFT/AVCm1	Two-sided Wilcoxon test	0.25	25
6.76749e-89	0.309215	0.97	0.834	1.58928e-84	Fus	OFT/AVCm1	Two-sided Wilcoxon test	0.25	25
1.74448e-85	0.308958	0.908	0.698	4.09674e-81	Brd4	OFT/AVCm1	Two-sided Wilcoxon test	0.25	25
3.63941e-76	0.307814	0.93	0.819	8.54679e-72	Snrpe	OFT/AVCm1	Two-sided Wilcoxon test	0.25	25
2.39431e-109	0.307121	0.812	0.568	5.62279e-105	Zc3h14	OFT/AVCm1	Two-sided Wilcoxon test	0.25	25
4.33635e-110	0.306627	0.806	0.546	1.01835e-105	Yeats2	OFT/AVCm1	Two-sided Wilcoxon test	0.25	25
4.58761e-172	0.306331	0.38	0.122	1.07735e-167	Csrnp3	OFT/AVCm1	Two-sided Wilcoxon test	0.25	25
3.60072e-96	0.306236	0.882	0.648	8.45593e-92	Gatad2b	OFT/AVCm1	Two-sided Wilcoxon test	0.25	25
1.67295e-116	0.306206	0.646	0.354	3.92875e-112	Tpm2	OFT/AVCm1	Two-sided Wilcoxon test	0.25	25
4.68993e-110	0.305746	0.847	0.6	1.10138e-105	Ilf3	OFT/AVCm1	Two-sided Wilcoxon test	0.25	25
4.57192e-116	0.305725	0.738	0.478	1.07367e-111	Stau1	OFT/AVCm1	Two-sided Wilcoxon test	0.25	25
2.73816e-288	0.305511	0.332	0.057	6.43029e-284	Hoxa4	OFT/AVCm1	Two-sided Wilcoxon test	0.25	25
5.08921e-129	0.304912	0.748	0.463	1.19515e-124	Rcbtb2	OFT/AVCm1	Two-sided Wilcoxon test	0.25	25
9.92486e-126	0.304582	0.779	0.512	2.33076e-121	Arl3	OFT/AVCm1	Two-sided Wilcoxon test	0.25	25
4.74193e-73	0.304254	0.916	0.77	1.1136e-68	Prmt1	OFT/AVCm1	Two-sided Wilcoxon test	0.25	25
3.29692e-125	0.303882	0.776	0.494	7.7425e-121	Zfp422	OFT/AVCm1	Two-sided Wilcoxon test	0.25	25
1.23773e-61	0.303455	0.388	0.214	2.90669e-57	Piezo2	OFT/AVCm1	Two-sided Wilcoxon test	0.25	25
1.83507e-68	0.303274	0.272	0.122	4.30947e-64	Hs3st3a1	OFT/AVCm1	Two-sided Wilcoxon test	0.25	25
7.47473e-94	0.303203	0.819	0.581	1.75536e-89	Tab2	OFT/AVCm1	Two-sided Wilcoxon test	0.25	25
1.57325e-148	0.303059	0.533	0.251	3.69462e-144	D630045J12Rik	OFT/AVCm1	Two-sided Wilcoxon test	0.25	25
5.60649e-103	0.303021	0.779	0.535	1.31663e-98	Ubxn7	OFT/AVCm1	Two-sided Wilcoxon test	0.25	25
2.60298e-83	0.302238	0.856	0.589	6.11284e-79	Zfp36l1	OFT/AVCm1	Two-sided Wilcoxon test	0.25	25
1.11882e-61	0.301994	0.832	0.618	2.62743e-57	Ier2	OFT/AVCm1	Two-sided Wilcoxon test	0.25	25
2.93897e-90	0.301976	0.847	0.609	6.90188e-86	Ambra1	OFT/AVCm1	Two-sided Wilcoxon test	0.25	25
7.48337e-79	0.301857	0.958	0.778	1.75739e-74	Arid4b	OFT/AVCm1	Two-sided Wilcoxon test	0.25	25
8.2007e-85	0.301822	0.877	0.628	1.92585e-80	Tmcc1	OFT/AVCm1	Two-sided Wilcoxon test	0.25	25
2.10256e-77	0.301694	0.963	0.878	4.93766e-73	Hnrnpu	OFT/AVCm1	Two-sided Wilcoxon test	0.25	25
1.47168e-124	0.301397	0.499	0.245	3.45609e-120	Pcbp3	OFT/AVCm1	Two-sided Wilcoxon test	0.25	25
4.62456e-79	0.300723	0.96	0.748	1.08603e-74	Myh10	OFT/AVCm1	Two-sided Wilcoxon test	0.25	25
5.92208e-96	0.300396	0.892	0.668	1.39074e-91	Atad2b	OFT/AVCm1	Two-sided Wilcoxon test	0.25	25
6.99659e-96	0.300341	0.825	0.575	1.64308e-91	Zfp609	OFT/AVCm1	Two-sided Wilcoxon test	0.25	25
4.08497e-75	0.300021	0.906	0.721	9.59314e-71	Bclaf1	OFT/AVCm1	Two-sided Wilcoxon test	0.25	25
2.68115e-81	0.299435	0.742	0.46	6.29641e-77	Kif26b	OFT/AVCm1	Two-sided Wilcoxon test	0.25	25
1.22274e-176	0.29883	0.413	0.147	2.87148e-172	Snai2	OFT/AVCm1	Two-sided Wilcoxon test	0.25	25
4.88267e-114	0.298633	0.258	0.083	1.14665e-109	Wnt2	OFT/AVCm1	Two-sided Wilcoxon test	0.25	25
3.91807e-69	0.298373	0.879	0.653	9.20121e-65	Bbx	OFT/AVCm1	Two-sided Wilcoxon test	0.25	25
1.22361e-93	0.298263	0.886	0.67	2.87353e-89	Pum2	OFT/AVCm1	Two-sided Wilcoxon test	0.25	25
3.4511e-91	0.298088	0.863	0.634	8.10456e-87	Hp1bp3	OFT/AVCm1	Two-sided Wilcoxon test	0.25	25
1.10632e-120	0.297321	0.738	0.47	2.59809e-116	Smarcd1	OFT/AVCm1	Two-sided Wilcoxon test	0.25	25
1.82253e-99	0.296741	0.675	0.39	4.28002e-95	Adamts6	OFT/AVCm1	Two-sided Wilcoxon test	0.25	25
6.23476e-37	0.29664	0.4	0.261	1.46417e-32	Plcl1	OFT/AVCm1	Two-sided Wilcoxon test	0.25	25
1.32115e-111	0.296625	0.696	0.421	3.10259e-107	St5	OFT/AVCm1	Two-sided Wilcoxon test	0.25	25
1.3197e-119	0.296437	0.721	0.435	3.09919e-115	Zfp516	OFT/AVCm1	Two-sided Wilcoxon test	0.25	25
7.16989e-82	0.296162	0.959	0.885	1.68378e-77	Hnrnpa3	OFT/AVCm1	Two-sided Wilcoxon test	0.25	25
7.92061e-97	0.295895	0.854	0.621	1.86008e-92	Xpo7	OFT/AVCm1	Two-sided Wilcoxon test	0.25	25
6.59333e-99	0.295712	0.743	0.487	1.54838e-94	Rnf169	OFT/AVCm1	Two-sided Wilcoxon test	0.25	25
2.46095e-147	0.295659	0.56	0.257	5.7793e-143	St6gal1	OFT/AVCm1	Two-sided Wilcoxon test	0.25	25
5.08429e-91	0.295359	0.867	0.634	1.194e-86	Ogt	OFT/AVCm1	Two-sided Wilcoxon test	0.25	25
2.07342e-102	0.295004	0.68	0.436	4.86923e-98	Dhx40	OFT/AVCm1	Two-sided Wilcoxon test	0.25	25
3.39796e-91	0.294806	0.659	0.421	7.97976e-87	Elovl6	OFT/AVCm1	Two-sided Wilcoxon test	0.25	25
8.44641e-81	0.294721	0.897	0.744	1.98356e-76	Eif3e	OFT/AVCm1	Two-sided Wilcoxon test	0.25	25
5.63941e-89	0.294504	0.736	0.484	1.32436e-84	Spred2	OFT/AVCm1	Two-sided Wilcoxon test	0.25	25
1.26779e-97	0.294425	0.849	0.621	2.97727e-93	Hdac2	OFT/AVCm1	Two-sided Wilcoxon test	0.25	25
4.20516e-96	0.293989	0.423	0.201	9.8754e-92	Gm49267	OFT/AVCm1	Two-sided Wilcoxon test	0.25	25
3.38238e-183	0.293761	0.372	0.116	7.94317e-179	Hotairm1	OFT/AVCm1	Two-sided Wilcoxon test	0.25	25
2.06183e-80	0.293474	0.894	0.669	4.842e-76	Mbd5	OFT/AVCm1	Two-sided Wilcoxon test	0.25	25
2.31892e-112	0.293229	0.559	0.287	5.44576e-108	Peli2	OFT/AVCm1	Two-sided Wilcoxon test	0.25	25
6.74592e-99	0.293219	0.977	0.891	1.58421e-94	Srrm2	OFT/AVCm1	Two-sided Wilcoxon test	0.25	25
7.04512e-142	0.292925	0.336	0.111	1.65448e-137	Scube1	OFT/AVCm1	Two-sided Wilcoxon test	0.25	25
1.00358e-103	0.292457	0.568	0.307	2.35681e-99	Serpine2	OFT/AVCm1	Two-sided Wilcoxon test	0.25	25
2.06477e-105	0.292422	0.655	0.391	4.84892e-101	Stau2	OFT/AVCm1	Two-sided Wilcoxon test	0.25	25
7.18196e-168	0.292266	0.549	0.239	1.68661e-163	Notch3	OFT/AVCm1	Two-sided Wilcoxon test	0.25	25
8.12644e-87	0.292033	0.873	0.652	1.90841e-82	Scaf8	OFT/AVCm1	Two-sided Wilcoxon test	0.25	25
1.11298e-104	0.291938	0.79	0.481	2.61373e-100	Ncam1	OFT/AVCm1	Two-sided Wilcoxon test	0.25	25
1.65726e-140	0.291518	0.62	0.327	3.89192e-136	Arhgef17	OFT/AVCm1	Two-sided Wilcoxon test	0.25	25
4.24951e-91	0.29124	0.86	0.651	9.97954e-87	Rcc2	OFT/AVCm1	Two-sided Wilcoxon test	0.25	25
7.80133e-111	0.290919	0.731	0.432	1.83206e-106	Ank2	OFT/AVCm1	Two-sided Wilcoxon test	0.25	25
1.40708e-114	0.290911	0.804	0.524	3.30438e-110	Usp22	OFT/AVCm1	Two-sided Wilcoxon test	0.25	25
1.42818e-84	0.290483	0.94	0.683	3.35394e-80	Kcnq1ot1	OFT/AVCm1	Two-sided Wilcoxon test	0.25	25
1.97611e-86	0.289763	0.83	0.559	4.6407e-82	Actn1	OFT/AVCm1	Two-sided Wilcoxon test	0.25	25
4.93176e-86	0.289372	0.901	0.697	1.15817e-81	Taf15	OFT/AVCm1	Two-sided Wilcoxon test	0.25	25
2.51592e-69	0.289275	0.945	0.739	5.90838e-65	Zfand3	OFT/AVCm1	Two-sided Wilcoxon test	0.25	25
1.05985e-90	0.289231	0.882	0.648	2.48894e-86	Cul3	OFT/AVCm1	Two-sided Wilcoxon test	0.25	25
9.19969e-144	0.288921	0.425	0.175	2.16045e-139	Rflnb	OFT/AVCm1	Two-sided Wilcoxon test	0.25	25
9.75487e-88	0.288866	0.863	0.585	2.29083e-83	Flna	OFT/AVCm1	Two-sided Wilcoxon test	0.25	25
1.95318e-60	0.288265	0.965	0.923	4.58685e-56	Mif	OFT/AVCm1	Two-sided Wilcoxon test	0.25	25
7.34214e-97	0.288131	0.78	0.529	1.72423e-92	Znrf1	OFT/AVCm1	Two-sided Wilcoxon test	0.25	25
5.58663e-120	0.288099	0.648	0.39	1.31196e-115	Nmral1	OFT/AVCm1	Two-sided Wilcoxon test	0.25	25
1.40029e-74	0.28804	0.78	0.542	3.28844e-70	Gse1	OFT/AVCm1	Two-sided Wilcoxon test	0.25	25
1.92896e-76	0.287989	0.96	0.787	4.52998e-72	Strn3	OFT/AVCm1	Two-sided Wilcoxon test	0.25	25
1.67134e-87	0.28798	0.898	0.669	3.92498e-83	Zfp280d	OFT/AVCm1	Two-sided Wilcoxon test	0.25	25
7.89245e-87	0.287902	0.412	0.202	1.85346e-82	Cux2	OFT/AVCm1	Two-sided Wilcoxon test	0.25	25
8.57579e-98	0.287685	0.801	0.572	2.01394e-93	Ppdpf	OFT/AVCm1	Two-sided Wilcoxon test	0.25	25
1.78701e-85	0.287344	0.874	0.649	4.19661e-81	Setd2	OFT/AVCm1	Two-sided Wilcoxon test	0.25	25
2.61721e-119	0.28724	0.681	0.416	6.14627e-115	Ip6k2	OFT/AVCm1	Two-sided Wilcoxon test	0.25	25
5.19586e-48	0.287191	0.756	0.579	1.2202e-43	Aopep	OFT/AVCm1	Two-sided Wilcoxon test	0.25	25
2.75259e-167	0.286872	0.563	0.247	6.46417e-163	Efnb1	OFT/AVCm1	Two-sided Wilcoxon test	0.25	25
2.75249e-94	0.286781	0.789	0.554	6.46395e-90	Brd3	OFT/AVCm1	Two-sided Wilcoxon test	0.25	25
4.35235e-78	0.286526	0.866	0.637	1.02211e-73	Sec63	OFT/AVCm1	Two-sided Wilcoxon test	0.25	25
8.69646e-112	0.286433	0.714	0.443	2.04228e-107	Cplane1	OFT/AVCm1	Two-sided Wilcoxon test	0.25	25
1.68097e-79	0.286151	0.923	0.77	3.94759e-75	Nono	OFT/AVCm1	Two-sided Wilcoxon test	0.25	25
1.91077e-97	0.286029	0.336	0.138	4.48725e-93	Map2	OFT/AVCm1	Two-sided Wilcoxon test	0.25	25
4.68949e-129	0.286025	0.663	0.359	1.10128e-124	Timp2	OFT/AVCm1	Two-sided Wilcoxon test	0.25	25
2.01589e-81	0.285767	0.928	0.75	4.73411e-77	Hnrnpdl	OFT/AVCm1	Two-sided Wilcoxon test	0.25	25
9.52514e-119	0.285742	0.693	0.402	2.23688e-114	Sestd1	OFT/AVCm1	Two-sided Wilcoxon test	0.25	25
4.09846e-71	0.285583	0.964	0.791	9.62482e-67	Ankrd11	OFT/AVCm1	Two-sided Wilcoxon test	0.25	25
1.71538e-102	0.285362	0.602	0.35	4.0284e-98	Prdm5	OFT/AVCm1	Two-sided Wilcoxon test	0.25	25
6.929e-122	0.284956	0.695	0.416	1.62721e-117	Rcbtb1	OFT/AVCm1	Two-sided Wilcoxon test	0.25	25
1.39803e-67	0.2849	0.933	0.816	3.28313e-63	Snrpd1	OFT/AVCm1	Two-sided Wilcoxon test	0.25	25
8.59992e-93	0.284582	0.878	0.643	2.01961e-88	Ddx50	OFT/AVCm1	Two-sided Wilcoxon test	0.25	25
9.75677e-65	0.284546	0.925	0.814	2.29128e-60	Elob	OFT/AVCm1	Two-sided Wilcoxon test	0.25	25
4.33171e-94	0.284497	0.813	0.548	1.01726e-89	Abi2	OFT/AVCm1	Two-sided Wilcoxon test	0.25	25
1.27681e-132	0.284255	0.785	0.427	2.99846e-128	Bicc1	OFT/AVCm1	Two-sided Wilcoxon test	0.25	25
2.10599e-237	0.283963	0.404	0.109	4.94571e-233	Cntfr	OFT/AVCm1	Two-sided Wilcoxon test	0.25	25
7.36459e-79	0.283857	0.94	0.751	1.7295e-74	Senp6	OFT/AVCm1	Two-sided Wilcoxon test	0.25	25
4.89643e-81	0.283308	0.883	0.69	1.14988e-76	Polr2m	OFT/AVCm1	Two-sided Wilcoxon test	0.25	25
3.19455e-102	0.283287	0.601	0.354	7.50207e-98	Sept6	OFT/AVCm1	Two-sided Wilcoxon test	0.25	25
1.94139e-77	0.283237	0.96	0.811	4.55916e-73	Rbm25	OFT/AVCm1	Two-sided Wilcoxon test	0.25	25
1.23305e-81	0.283136	0.782	0.548	2.89569e-77	AW554918	OFT/AVCm1	Two-sided Wilcoxon test	0.25	25
1.27886e-73	0.28311	0.875	0.656	3.00326e-69	Ncoa2	OFT/AVCm1	Two-sided Wilcoxon test	0.25	25
1.60765e-88	0.283085	0.839	0.607	3.77539e-84	Qrich1	OFT/AVCm1	Two-sided Wilcoxon test	0.25	25
3.82504e-58	0.282795	0.426	0.259	8.98273e-54	Phlda1	OFT/AVCm1	Two-sided Wilcoxon test	0.25	25
1.0802e-104	0.282645	0.656	0.398	2.53674e-100	Cep85l	OFT/AVCm1	Two-sided Wilcoxon test	0.25	25
6.44261e-90	0.282439	0.856	0.588	1.51298e-85	Ddah2	OFT/AVCm1	Two-sided Wilcoxon test	0.25	25
3.997e-74	0.282307	0.874	0.674	9.38656e-70	Dyrk1a	OFT/AVCm1	Two-sided Wilcoxon test	0.25	25
1.10746e-125	0.282239	0.36	0.139	2.60075e-121	Egflam	OFT/AVCm1	Two-sided Wilcoxon test	0.25	25
2.01767e-82	0.282156	0.88	0.67	4.73829e-78	Smarca4	OFT/AVCm1	Two-sided Wilcoxon test	0.25	25
1.08921e-69	0.281873	0.818	0.585	2.5579e-65	Add3	OFT/AVCm1	Two-sided Wilcoxon test	0.25	25
1.53359e-94	0.281119	0.81	0.561	3.60147e-90	Ptpn4	OFT/AVCm1	Two-sided Wilcoxon test	0.25	25
7.38708e-96	0.281033	0.837	0.575	1.73478e-91	Smad4	OFT/AVCm1	Two-sided Wilcoxon test	0.25	25
2.38237e-106	0.280945	0.702	0.416	5.59475e-102	1700025G04Rik	OFT/AVCm1	Two-sided Wilcoxon test	0.25	25
8.76e-119	0.28009	0.627	0.354	2.0572e-114	Lrp12	OFT/AVCm1	Two-sided Wilcoxon test	0.25	25
1.32141e-66	0.279412	0.897	0.714	3.1032e-62	Scaf11	OFT/AVCm1	Two-sided Wilcoxon test	0.25	25
1.07839e-68	0.279225	0.887	0.706	2.5325e-64	Eid1	OFT/AVCm1	Two-sided Wilcoxon test	0.25	25
1.31835e-132	0.279104	0.725	0.421	3.09601e-128	Limd2	OFT/AVCm1	Two-sided Wilcoxon test	0.25	25
4.59977e-109	0.278994	0.787	0.492	1.08021e-104	Yap1	OFT/AVCm1	Two-sided Wilcoxon test	0.25	25
1.12627e-107	0.278898	0.736	0.468	2.64493e-103	Acsl3	OFT/AVCm1	Two-sided Wilcoxon test	0.25	25
2.03077e-111	0.278733	0.754	0.483	4.76906e-107	Prkacb	OFT/AVCm1	Two-sided Wilcoxon test	0.25	25
6.42404e-135	0.278081	0.588	0.298	1.50862e-130	Lrp1	OFT/AVCm1	Two-sided Wilcoxon test	0.25	25
1.41014e-74	0.277859	0.856	0.644	3.31158e-70	Ubn2	OFT/AVCm1	Two-sided Wilcoxon test	0.25	25
3.94364e-84	0.277524	0.674	0.448	9.26123e-80	Sos2	OFT/AVCm1	Two-sided Wilcoxon test	0.25	25
5.07903e-99	0.277406	0.825	0.554	1.19276e-94	Rcn2	OFT/AVCm1	Two-sided Wilcoxon test	0.25	25
3.90719e-102	0.276964	0.743	0.491	9.17563e-98	Ube2e1	OFT/AVCm1	Two-sided Wilcoxon test	0.25	25
4.85585e-83	0.27662	0.875	0.647	1.14035e-78	Gtf2i	OFT/AVCm1	Two-sided Wilcoxon test	0.25	25
6.99004e-116	0.276601	0.553	0.281	1.64154e-111	Pcolce	OFT/AVCm1	Two-sided Wilcoxon test	0.25	25
7.36448e-80	0.276534	0.674	0.448	1.72948e-75	Zbtb11	OFT/AVCm1	Two-sided Wilcoxon test	0.25	25
2.13941e-72	0.27641	0.89	0.634	5.02419e-68	Tpm4	OFT/AVCm1	Two-sided Wilcoxon test	0.25	25
4.15199e-86	0.276248	0.846	0.616	9.75054e-82	Cdk12	OFT/AVCm1	Two-sided Wilcoxon test	0.25	25
4.20781e-103	0.276148	0.67	0.376	9.88162e-99	Rnd3	OFT/AVCm1	Two-sided Wilcoxon test	0.25	25
6.89871e-128	0.275954	0.668	0.37	1.62009e-123	Fzd3	OFT/AVCm1	Two-sided Wilcoxon test	0.25	25
1.80947e-66	0.275929	0.521	0.323	4.24935e-62	Mdfic	OFT/AVCm1	Two-sided Wilcoxon test	0.25	25
3.37258e-73	0.275266	0.905	0.753	7.92017e-69	Sf3b2	OFT/AVCm1	Two-sided Wilcoxon test	0.25	25
2.99724e-131	0.27524	0.61	0.329	7.03872e-127	Mex3a	OFT/AVCm1	Two-sided Wilcoxon test	0.25	25
1.38024e-104	0.275185	0.408	0.184	3.24135e-100	Dclk1	OFT/AVCm1	Two-sided Wilcoxon test	0.25	25
2.03137e-78	0.274545	0.887	0.671	4.77047e-74	Usp47	OFT/AVCm1	Two-sided Wilcoxon test	0.25	25
1.62885e-63	0.274056	0.935	0.756	3.8252e-59	Asap1	OFT/AVCm1	Two-sided Wilcoxon test	0.25	25
2.4437e-91	0.273947	0.86	0.638	5.73879e-87	Hnrnpl	OFT/AVCm1	Two-sided Wilcoxon test	0.25	25
2.51033e-79	0.27373	0.857	0.645	5.89525e-75	Matr3	OFT/AVCm1	Two-sided Wilcoxon test	0.25	25
2.0012e-68	0.273522	0.921	0.691	4.69961e-64	Eif4g3	OFT/AVCm1	Two-sided Wilcoxon test	0.25	25
2.15538e-65	0.273319	0.935	0.783	5.06169e-61	Ywhaq	OFT/AVCm1	Two-sided Wilcoxon test	0.25	25
7.44895e-70	0.273277	0.881	0.613	1.74931e-65	Zswim6	OFT/AVCm1	Two-sided Wilcoxon test	0.25	25
1.571e-87	0.273247	0.82	0.597	3.68934e-83	Sumo3	OFT/AVCm1	Two-sided Wilcoxon test	0.25	25
3.16043e-73	0.272946	0.989	0.93	7.42196e-69	Nedd4	OFT/AVCm1	Two-sided Wilcoxon test	0.25	25
7.67233e-106	0.272007	0.787	0.538	1.80177e-101	Tcf3	OFT/AVCm1	Two-sided Wilcoxon test	0.25	25
1.10249e-92	0.271879	0.809	0.569	2.5891e-88	Smarcb1	OFT/AVCm1	Two-sided Wilcoxon test	0.25	25
1.57659e-143	0.271789	0.426	0.163	3.70247e-139	Svep1	OFT/AVCm1	Two-sided Wilcoxon test	0.25	25
2.2536e-76	0.271576	0.865	0.645	5.29236e-72	Epc1	OFT/AVCm1	Two-sided Wilcoxon test	0.25	25
2.03046e-95	0.271308	0.705	0.443	4.76834e-91	Mboat2	OFT/AVCm1	Two-sided Wilcoxon test	0.25	25
1.98954e-96	0.271143	0.699	0.435	4.67222e-92	Rnf130	OFT/AVCm1	Two-sided Wilcoxon test	0.25	25
2.90603e-102	0.270975	0.728	0.473	6.82452e-98	Ankrd10	OFT/AVCm1	Two-sided Wilcoxon test	0.25	25
9.55138e-88	0.270812	0.807	0.57	2.24305e-83	Paip1	OFT/AVCm1	Two-sided Wilcoxon test	0.25	25
3.0771e-190	0.270332	0.347	0.095	7.22626e-186	Ntf3	OFT/AVCm1	Two-sided Wilcoxon test	0.25	25
4.59857e-95	0.270328	0.815	0.573	1.07993e-90	Epc2	OFT/AVCm1	Two-sided Wilcoxon test	0.25	25
1.76286e-82	0.270226	0.898	0.69	4.1399e-78	Rbm6	OFT/AVCm1	Two-sided Wilcoxon test	0.25	25
1.63175e-89	0.269894	0.483	0.249	3.83201e-85	Daam2	OFT/AVCm1	Two-sided Wilcoxon test	0.25	25
9.53042e-90	0.26988	0.705	0.464	2.23812e-85	Slf1	OFT/AVCm1	Two-sided Wilcoxon test	0.25	25
7.03445e-69	0.269758	0.922	0.771	1.65197e-64	Pebp1	OFT/AVCm1	Two-sided Wilcoxon test	0.25	25
5.75735e-73	0.269371	0.846	0.635	1.35206e-68	Kcmf1	OFT/AVCm1	Two-sided Wilcoxon test	0.25	25
2.42748e-82	0.269229	0.85	0.624	5.70069e-78	Myef2	OFT/AVCm1	Two-sided Wilcoxon test	0.25	25
1.30712e-74	0.269202	0.879	0.66	3.06963e-70	Bptf	OFT/AVCm1	Two-sided Wilcoxon test	0.25	25
1.16453e-94	0.269017	0.762	0.523	2.73479e-90	Appl1	OFT/AVCm1	Two-sided Wilcoxon test	0.25	25
1.75003e-81	0.269004	0.758	0.524	4.10978e-77	St7	OFT/AVCm1	Two-sided Wilcoxon test	0.25	25
7.02836e-100	0.268963	0.514	0.249	1.65054e-95	Cxcl12	OFT/AVCm1	Two-sided Wilcoxon test	0.25	25
6.80416e-78	0.268779	0.864	0.664	1.59789e-73	Ccar1	OFT/AVCm1	Two-sided Wilcoxon test	0.25	25
4.27656e-86	0.268231	0.629	0.4	1.00431e-81	Sclt1	OFT/AVCm1	Two-sided Wilcoxon test	0.25	25
2.42431e-78	0.268126	0.82	0.596	5.69324e-74	Parp1	OFT/AVCm1	Two-sided Wilcoxon test	0.25	25
6.78956e-175	0.267607	0.468	0.178	1.59446e-170	Nsg1	OFT/AVCm1	Two-sided Wilcoxon test	0.25	25
2.41067e-57	0.267279	0.901	0.768	5.66122e-53	Snrpd2	OFT/AVCm1	Two-sided Wilcoxon test	0.25	25
1.57176e-89	0.267257	0.744	0.482	3.69112e-85	Ubtd2	OFT/AVCm1	Two-sided Wilcoxon test	0.25	25
2.11458e-42	0.26717	0.35	0.212	4.96588e-38	Map3k5	OFT/AVCm1	Two-sided Wilcoxon test	0.25	25
2.93223e-173	0.267068	0.252	0.056	6.88606e-169	Adamts20	OFT/AVCm1	Two-sided Wilcoxon test	0.25	25
1.61288e-79	0.267029	0.787	0.557	3.78769e-75	Nrf1	OFT/AVCm1	Two-sided Wilcoxon test	0.25	25
1.44648e-108	0.266303	0.43	0.196	3.3969e-104	Bmp4	OFT/AVCm1	Two-sided Wilcoxon test	0.25	25
1.2306e-90	0.266059	0.777	0.516	2.88995e-86	Pgrmc1	OFT/AVCm1	Two-sided Wilcoxon test	0.25	25
7.09471e-65	0.266021	0.995	0.985	1.66612e-60	Actb	OFT/AVCm1	Two-sided Wilcoxon test	0.25	25
5.35724e-148	0.265998	0.354	0.117	1.25809e-143	Kif5c	OFT/AVCm1	Two-sided Wilcoxon test	0.25	25
1.84557e-113	0.265981	0.677	0.409	4.33414e-109	Rbm4b	OFT/AVCm1	Two-sided Wilcoxon test	0.25	25
7.77544e-100	0.265603	0.607	0.365	1.82599e-95	Stxbp4	OFT/AVCm1	Two-sided Wilcoxon test	0.25	25
6.15223e-97	0.265476	0.68	0.432	1.44479e-92	Apex2	OFT/AVCm1	Two-sided Wilcoxon test	0.25	25
4.91901e-74	0.265458	0.856	0.644	1.15518e-69	Tcerg1	OFT/AVCm1	Two-sided Wilcoxon test	0.25	25
1.16744e-67	0.265312	0.401	0.207	2.74161e-63	Prdm16	OFT/AVCm1	Two-sided Wilcoxon test	0.25	25
5.31615e-72	0.264872	0.935	0.744	1.24844e-67	Wac	OFT/AVCm1	Two-sided Wilcoxon test	0.25	25
2.80812e-91	0.264713	0.814	0.575	6.59459e-87	Ireb2	OFT/AVCm1	Two-sided Wilcoxon test	0.25	25
1.17863e-71	0.2647	0.915	0.721	2.7679e-67	Gpatch8	OFT/AVCm1	Two-sided Wilcoxon test	0.25	25
2.28042e-93	0.26467	0.806	0.525	5.35535e-89	Map4k3	OFT/AVCm1	Two-sided Wilcoxon test	0.25	25
1.05733e-86	0.264419	0.881	0.601	2.48304e-82	Zfp521	OFT/AVCm1	Two-sided Wilcoxon test	0.25	25
1.01971e-98	0.264419	0.646	0.402	2.39468e-94	Pogz	OFT/AVCm1	Two-sided Wilcoxon test	0.25	25
1.27464e-84	0.264323	0.824	0.571	2.99337e-80	Trim44	OFT/AVCm1	Two-sided Wilcoxon test	0.25	25
9.33523e-75	0.26425	0.903	0.704	2.19228e-70	Wdr33	OFT/AVCm1	Two-sided Wilcoxon test	0.25	25
2.01568e-90	0.264018	0.818	0.578	4.73363e-86	Zmym2	OFT/AVCm1	Two-sided Wilcoxon test	0.25	25
3.72917e-72	0.263992	0.909	0.732	8.75758e-68	Smc3	OFT/AVCm1	Two-sided Wilcoxon test	0.25	25
6.00827e-101	0.26392	0.675	0.398	1.41098e-96	Chn1	OFT/AVCm1	Two-sided Wilcoxon test	0.25	25
1.53254e-78	0.263518	0.766	0.523	3.59901e-74	Pdxdc1	OFT/AVCm1	Two-sided Wilcoxon test	0.25	25
7.58923e-71	0.263362	0.598	0.385	1.78225e-66	Fut8	OFT/AVCm1	Two-sided Wilcoxon test	0.25	25
1.13212e-115	0.263323	0.471	0.22	2.65866e-111	Nr6a1os	OFT/AVCm1	Two-sided Wilcoxon test	0.25	25
1.12743e-60	0.263288	0.952	0.771	2.64766e-56	Ankrd17	OFT/AVCm1	Two-sided Wilcoxon test	0.25	25
3.75316e-67	0.263011	0.89	0.659	8.81392e-63	Fbxl17	OFT/AVCm1	Two-sided Wilcoxon test	0.25	25
1.25589e-67	0.262686	0.942	0.739	2.94934e-63	Srek1	OFT/AVCm1	Two-sided Wilcoxon test	0.25	25
1.36733e-71	0.262488	0.906	0.705	3.21104e-67	Elavl1	OFT/AVCm1	Two-sided Wilcoxon test	0.25	25
1.81094e-79	0.26231	0.896	0.701	4.25281e-75	Arglu1	OFT/AVCm1	Two-sided Wilcoxon test	0.25	25
2.08748e-91	0.262011	0.717	0.474	4.90223e-87	Midn	OFT/AVCm1	Two-sided Wilcoxon test	0.25	25
2.21271e-93	0.261813	0.74	0.497	5.19633e-89	Qser1	OFT/AVCm1	Two-sided Wilcoxon test	0.25	25
2.84989e-100	0.261653	0.694	0.45	6.69269e-96	Rbmx	OFT/AVCm1	Two-sided Wilcoxon test	0.25	25
4.40405e-64	0.261602	0.72	0.501	1.03425e-59	Cpq	OFT/AVCm1	Two-sided Wilcoxon test	0.25	25
1.09414e-86	0.261318	0.84	0.597	2.56948e-82	Prrc2b	OFT/AVCm1	Two-sided Wilcoxon test	0.25	25
4.03682e-73	0.261184	0.614	0.376	9.48008e-69	Sema6a	OFT/AVCm1	Two-sided Wilcoxon test	0.25	25
6.85185e-104	0.261148	0.662	0.402	1.60909e-99	Camsap2	OFT/AVCm1	Two-sided Wilcoxon test	0.25	25
3.4955e-59	0.261094	0.923	0.781	8.20883e-55	Gas5	OFT/AVCm1	Two-sided Wilcoxon test	0.25	25
7.75158e-87	0.260908	0.804	0.511	1.82038e-82	Fscn1	OFT/AVCm1	Two-sided Wilcoxon test	0.25	25
3.2382e-81	0.260469	0.847	0.597	7.60459e-77	Tgfbr1	OFT/AVCm1	Two-sided Wilcoxon test	0.25	25
1.92166e-54	0.260441	0.98	0.961	4.51282e-50	Tubb5	OFT/AVCm1	Two-sided Wilcoxon test	0.25	25
3.04759e-64	0.260272	0.841	0.652	7.15697e-60	Ssrp1	OFT/AVCm1	Two-sided Wilcoxon test	0.25	25
1.98834e-77	0.260097	0.543	0.311	4.66941e-73	B3galt1	OFT/AVCm1	Two-sided Wilcoxon test	0.25	25
1.64902e-84	0.260051	0.805	0.57	3.87256e-80	Grcc10	OFT/AVCm1	Two-sided Wilcoxon test	0.25	25
2.65205e-92	0.260035	0.702	0.461	6.22808e-88	Kdm3b	OFT/AVCm1	Two-sided Wilcoxon test	0.25	25
1.16881e-73	0.259919	0.701	0.481	2.74484e-69	Pacs1	OFT/AVCm1	Two-sided Wilcoxon test	0.25	25
1.24845e-70	0.259823	0.901	0.688	2.93187e-66	Ppp2r2a	OFT/AVCm1	Two-sided Wilcoxon test	0.25	25
5.44393e-69	0.259793	0.918	0.758	1.27845e-64	Rbbp4	OFT/AVCm1	Two-sided Wilcoxon test	0.25	25
7.12671e-17	0.259707	0.713	0.633	1.67364e-12	Top2a	OFT/AVCm1	Two-sided Wilcoxon test	0.25	25
9.06275e-80	0.259524	0.672	0.425	2.1283e-75	Sgce	OFT/AVCm1	Two-sided Wilcoxon test	0.25	25
4.7847e-41	0.259261	0.316	0.18	1.12364e-36	Zfp536	OFT/AVCm1	Two-sided Wilcoxon test	0.25	25
7.01426e-74	0.259261	0.861	0.654	1.64723e-69	Ctcf	OFT/AVCm1	Two-sided Wilcoxon test	0.25	25
2.32367e-76	0.259115	0.886	0.689	5.45691e-72	Scd2	OFT/AVCm1	Two-sided Wilcoxon test	0.25	25
8.07693e-86	0.259109	0.541	0.279	1.89679e-81	Nkain3	OFT/AVCm1	Two-sided Wilcoxon test	0.25	25
2.45568e-148	0.258814	0.308	0.094	5.76691e-144	A830082K12Rik	OFT/AVCm1	Two-sided Wilcoxon test	0.25	25
8.011e-74	0.25877	0.332	0.157	1.8813e-69	Ncald	OFT/AVCm1	Two-sided Wilcoxon test	0.25	25
8.36522e-105	0.25869	0.701	0.444	1.96449e-100	Dzip3	OFT/AVCm1	Two-sided Wilcoxon test	0.25	25
7.69922e-59	0.258654	0.986	0.963	1.80808e-54	Rps26	OFT/AVCm1	Two-sided Wilcoxon test	0.25	25
3.31237e-88	0.258625	0.739	0.511	7.77877e-84	Smarcc2	OFT/AVCm1	Two-sided Wilcoxon test	0.25	25
2.83534e-83	0.258562	0.783	0.55	6.65852e-79	Tasor2	OFT/AVCm1	Two-sided Wilcoxon test	0.25	25
9.42717e-211	0.258406	0.322	0.075	2.21388e-206	Hoxa3	OFT/AVCm1	Two-sided Wilcoxon test	0.25	25
3.79367e-70	0.258258	0.851	0.667	8.90905e-66	Tsn	OFT/AVCm1	Two-sided Wilcoxon test	0.25	25
1.79576e-114	0.258181	0.634	0.349	4.21716e-110	Eva1b	OFT/AVCm1	Two-sided Wilcoxon test	0.25	25
4.89335e-100	0.258119	0.666	0.396	1.14915e-95	Arhgap32	OFT/AVCm1	Two-sided Wilcoxon test	0.25	25
1.09825e-94	0.258004	0.621	0.378	2.57912e-90	Tle1	OFT/AVCm1	Two-sided Wilcoxon test	0.25	25
2.74532e-87	0.257953	0.701	0.464	6.44711e-83	Ipo9	OFT/AVCm1	Two-sided Wilcoxon test	0.25	25
5.71288e-78	0.257521	0.871	0.647	1.34161e-73	Rlf	OFT/AVCm1	Two-sided Wilcoxon test	0.25	25
9.13406e-77	0.257348	0.816	0.592	2.14504e-72	Snrpa	OFT/AVCm1	Two-sided Wilcoxon test	0.25	25
4.04587e-65	0.257251	0.966	0.896	9.50131e-61	Gnas	OFT/AVCm1	Two-sided Wilcoxon test	0.25	25
2.44288e-108	0.25707	0.709	0.452	5.73686e-104	Bcl7c	OFT/AVCm1	Two-sided Wilcoxon test	0.25	25
4.75801e-99	0.256549	0.256	0.087	1.11737e-94	Pak7	OFT/AVCm1	Two-sided Wilcoxon test	0.25	25
8.04206e-61	0.256481	0.938	0.806	1.8886e-56	Pcbp2	OFT/AVCm1	Two-sided Wilcoxon test	0.25	25
9.06399e-82	0.255809	0.805	0.575	2.12859e-77	Nfyc	OFT/AVCm1	Two-sided Wilcoxon test	0.25	25
9.29041e-40	0.255655	0.399	0.262	2.18176e-35	Hist1h1a	OFT/AVCm1	Two-sided Wilcoxon test	0.25	25
2.5317e-85	0.255535	0.73	0.491	5.94545e-81	Elp4	OFT/AVCm1	Two-sided Wilcoxon test	0.25	25
3.54715e-65	0.255393	0.734	0.531	8.33014e-61	E2f3	OFT/AVCm1	Two-sided Wilcoxon test	0.25	25
6.89036e-71	0.255385	0.907	0.743	1.61813e-66	Hnrnpa0	OFT/AVCm1	Two-sided Wilcoxon test	0.25	25
1.51866e-81	0.255377	0.821	0.572	3.56642e-77	Zdhhc20	OFT/AVCm1	Two-sided Wilcoxon test	0.25	25
1.95166e-100	0.255033	0.747	0.471	4.58327e-96	Fam135a	OFT/AVCm1	Two-sided Wilcoxon test	0.25	25
7.02212e-80	0.255022	0.651	0.41	1.64907e-75	Pde3b	OFT/AVCm1	Two-sided Wilcoxon test	0.25	25
2.59793e-74	0.255014	0.811	0.582	6.10098e-70	Apex1	OFT/AVCm1	Two-sided Wilcoxon test	0.25	25
4.19995e-251	0.254797	0.353	0.075	9.86317e-247	Hoxa2	OFT/AVCm1	Two-sided Wilcoxon test	0.25	25
3.10344e-73	0.254569	0.853	0.652	7.28811e-69	Sf1	OFT/AVCm1	Two-sided Wilcoxon test	0.25	25
7.275e-71	0.254555	0.952	0.884	1.70846e-66	Ywhae	OFT/AVCm1	Two-sided Wilcoxon test	0.25	25
4.62196e-81	0.254434	0.364	0.168	1.08542e-76	Adamts19	OFT/AVCm1	Two-sided Wilcoxon test	0.25	25
1.87758e-64	0.254093	0.745	0.549	4.40932e-60	Hmgcr	OFT/AVCm1	Two-sided Wilcoxon test	0.25	25
2.35532e-77	0.254066	0.837	0.6	5.53124e-73	Atf2	OFT/AVCm1	Two-sided Wilcoxon test	0.25	25
3.10623e-124	0.253652	0.595	0.325	7.29468e-120	Slc39a6	OFT/AVCm1	Two-sided Wilcoxon test	0.25	25
1.64459e-79	0.253496	0.893	0.663	3.86215e-75	Zfp148	OFT/AVCm1	Two-sided Wilcoxon test	0.25	25
1.47132e-85	0.253475	0.784	0.551	3.45524e-81	Lsm7	OFT/AVCm1	Two-sided Wilcoxon test	0.25	25
2.5976e-84	0.253262	0.798	0.572	6.10021e-80	Sinhcaf	OFT/AVCm1	Two-sided Wilcoxon test	0.25	25
5.60471e-102	0.253236	0.657	0.396	1.31621e-97	Zfp260	OFT/AVCm1	Two-sided Wilcoxon test	0.25	25
9.68055e-78	0.253151	0.824	0.585	2.27338e-73	Rest	OFT/AVCm1	Two-sided Wilcoxon test	0.25	25
2.50805e-75	0.253113	0.895	0.659	5.88989e-71	Arhgap5	OFT/AVCm1	Two-sided Wilcoxon test	0.25	25
4.84904e-83	0.25311	0.752	0.462	1.13875e-78	Rai14	OFT/AVCm1	Two-sided Wilcoxon test	0.25	25
2.973e-79	0.253062	0.837	0.607	6.98178e-75	Cstf3	OFT/AVCm1	Two-sided Wilcoxon test	0.25	25
1.36878e-57	0.252911	0.92	0.733	3.21444e-53	Kmt2c	OFT/AVCm1	Two-sided Wilcoxon test	0.25	25
3.02778e-78	0.25262	0.844	0.628	7.11044e-74	Kdm1a	OFT/AVCm1	Two-sided Wilcoxon test	0.25	25
2.66368e-79	0.252596	0.833	0.593	6.25539e-75	Tsen34	OFT/AVCm1	Two-sided Wilcoxon test	0.25	25
7.57383e-34	0.252524	0.577	0.428	1.77864e-29	Hist1h4d	OFT/AVCm1	Two-sided Wilcoxon test	0.25	25
3.33202e-88	0.252267	0.601	0.371	7.82493e-84	Sqle	OFT/AVCm1	Two-sided Wilcoxon test	0.25	25
7.73108e-51	0.252065	0.946	0.766	1.81557e-46	Serpinh1	OFT/AVCm1	Two-sided Wilcoxon test	0.25	25
3.81601e-69	0.251553	0.922	0.751	8.96151e-65	Psme4	OFT/AVCm1	Two-sided Wilcoxon test	0.25	25
7.61159e-97	0.251542	0.732	0.48	1.7875e-92	Chd9	OFT/AVCm1	Two-sided Wilcoxon test	0.25	25
5.45618e-86	0.251046	0.818	0.597	1.28133e-81	Pspc1	OFT/AVCm1	Two-sided Wilcoxon test	0.25	25
2.32022e-94	0.250664	0.748	0.483	5.44881e-90	Papss1	OFT/AVCm1	Two-sided Wilcoxon test	0.25	25
1.71732e-59	0.250572	0.919	0.755	4.03294e-55	Ube2k	OFT/AVCm1	Two-sided Wilcoxon test	0.25	25
6.95359e-82	0.250356	0.559	0.345	1.63298e-77	St3gal3	OFT/AVCm1	Two-sided Wilcoxon test	0.25	25
4.96179e-94	0.250099	0.442	0.225	1.16523e-89	Serpinf1	OFT/AVCm1	Two-sided Wilcoxon test	0.25	25
2.26478e-74	0.25002	0.712	0.494	5.3186e-70	Cdk5rap2	OFT/AVCm1	Two-sided Wilcoxon test	0.25	25
1.08734e-174	1.68674	0.743	0.466	2.55352e-170	Mecom	dOFTm	Two-sided Wilcoxon test	0.25	25
5.81645e-268	1.45528	0.728	0.348	1.36593e-263	Pdgfc	dOFTm	Two-sided Wilcoxon test	0.25	25
3.47156e-195	1.44373	0.543	0.22	8.15262e-191	Col25a1	dOFTm	Two-sided Wilcoxon test	0.25	25
1.54462e-275	1.4316	0.88	0.537	3.62739e-271	Foxp2	dOFTm	Two-sided Wilcoxon test	0.25	25
7.47847e-196	1.37229	0.743	0.513	1.75624e-191	Ptch1	dOFTm	Two-sided Wilcoxon test	0.25	25
6.24378e-227	1.2864	0.754	0.397	1.46629e-222	A630012P03Rik	dOFTm	Two-sided Wilcoxon test	0.25	25
8.8326e-184	1.2435	0.606	0.284	2.07425e-179	Eya4	dOFTm	Two-sided Wilcoxon test	0.25	25
1.57561e-176	1.24049	0.501	0.202	3.70017e-172	Col9a1	dOFTm	Two-sided Wilcoxon test	0.25	25
5.71466e-237	1.23764	0.871	0.508	1.34203e-232	Aff3	dOFTm	Two-sided Wilcoxon test	0.25	25
3.99349e-220	1.18618	0.734	0.39	9.37831e-216	Cadm1	dOFTm	Two-sided Wilcoxon test	0.25	25
7.25006e-235	1.14946	0.436	0.118	1.7026e-230	Ntng1	dOFTm	Two-sided Wilcoxon test	0.25	25
2.43289e-197	1.14806	0.603	0.257	5.71341e-193	Ebf3	dOFTm	Two-sided Wilcoxon test	0.25	25
6.71549e-200	1.1357	0.843	0.564	1.57706e-195	Trps1	dOFTm	Two-sided Wilcoxon test	0.25	25
1.26719e-145	1.13353	0.407	0.146	2.97587e-141	Tafa2	dOFTm	Two-sided Wilcoxon test	0.25	25
3.14047e-174	1.11408	0.377	0.119	7.37509e-170	Satb2	dOFTm	Two-sided Wilcoxon test	0.25	25
9.71329e-253	1.11335	0.97	0.728	2.28107e-248	Gpc3	dOFTm	Two-sided Wilcoxon test	0.25	25
7.68701e-195	1.09479	0.528	0.203	1.80522e-190	Col2a1	dOFTm	Two-sided Wilcoxon test	0.25	25
1.18159e-149	1.08279	0.648	0.366	2.77484e-145	Tox	dOFTm	Two-sided Wilcoxon test	0.25	25
2.21562e-155	1.06784	0.658	0.376	5.20316e-151	Col11a1	dOFTm	Two-sided Wilcoxon test	0.25	25
1.70974e-150	1.05623	0.732	0.566	4.01516e-146	Sox11	dOFTm	Two-sided Wilcoxon test	0.25	25
1.42088e-143	1.0531	0.81	0.636	3.3368e-139	Runx1t1	dOFTm	Two-sided Wilcoxon test	0.25	25
1.34783e-183	1.05269	0.613	0.283	3.16525e-179	Bmpr1b	dOFTm	Two-sided Wilcoxon test	0.25	25
1.08539e-162	1.0449	0.743	0.44	2.54892e-158	2610307P16Rik	dOFTm	Two-sided Wilcoxon test	0.25	25
7.0027e-251	1.03067	0.984	0.84	1.64451e-246	Pbx1	dOFTm	Two-sided Wilcoxon test	0.25	25
2.72999e-173	1.02355	0.859	0.531	6.41112e-169	Unc5c	dOFTm	Two-sided Wilcoxon test	0.25	25
4.92441e-173	1.02228	0.898	0.601	1.15645e-168	Robo1	dOFTm	Two-sided Wilcoxon test	0.25	25
3.45345e-140	0.994112	0.729	0.547	8.11007e-136	Nnat	dOFTm	Two-sided Wilcoxon test	0.25	25
6.9348e-197	0.992684	0.883	0.622	1.62857e-192	Frmd4a	dOFTm	Two-sided Wilcoxon test	0.25	25
4.49447e-205	0.987186	0.963	0.74	1.05548e-200	Meis2	dOFTm	Two-sided Wilcoxon test	0.25	25
2.28726e-190	0.980648	0.792	0.471	5.3714e-186	Mir100hg	dOFTm	Two-sided Wilcoxon test	0.25	25
7.62057e-126	0.970246	0.396	0.15	1.78961e-121	Adgrb3	dOFTm	Two-sided Wilcoxon test	0.25	25
1.85861e-143	0.941971	0.819	0.532	4.36476e-139	Tshz2	dOFTm	Two-sided Wilcoxon test	0.25	25
9.25028e-169	0.912993	0.919	0.686	2.17234e-164	Meis1	dOFTm	Two-sided Wilcoxon test	0.25	25
2.35047e-83	0.912874	0.255	0.089	5.51984e-79	Ebf2	dOFTm	Two-sided Wilcoxon test	0.25	25
2.27414e-163	0.901472	0.848	0.607	5.34058e-159	Kalrn	dOFTm	Two-sided Wilcoxon test	0.25	25
1.74342e-70	0.86718	0.45	0.261	4.09426e-66	Arhgap24	dOFTm	Two-sided Wilcoxon test	0.25	25
5.06991e-149	0.860574	0.629	0.35	1.19062e-144	Lpar1	dOFTm	Two-sided Wilcoxon test	0.25	25
1.14119e-116	0.860348	0.71	0.432	2.67996e-112	Ror1	dOFTm	Two-sided Wilcoxon test	0.25	25
5.92149e-153	0.856807	0.699	0.414	1.3906e-148	Bcl11a	dOFTm	Two-sided Wilcoxon test	0.25	25
1.37185e-154	0.852602	0.953	0.646	3.22166e-150	Gpc6	dOFTm	Two-sided Wilcoxon test	0.25	25
7.30833e-174	0.83575	0.574	0.254	1.71629e-169	Ddr2	dOFTm	Two-sided Wilcoxon test	0.25	25
1.74323e-130	0.833727	0.534	0.26	4.0938e-126	Cxcl12	dOFTm	Two-sided Wilcoxon test	0.25	25
5.81908e-07	0.829891	0.39	0.371	0.0136655	Xist	dOFTm	Two-sided Wilcoxon test	0.25	25
7.42841e-197	0.828703	0.907	0.803	1.74449e-192	Tut4	dOFTm	Two-sided Wilcoxon test	0.25	25
1.13097e-100	0.823349	0.359	0.148	2.65598e-96	Eya1	dOFTm	Two-sided Wilcoxon test	0.25	25
1.64756e-65	0.811073	0.404	0.227	3.86912e-61	Gm14582	dOFTm	Two-sided Wilcoxon test	0.25	25
1.9224e-91	0.806815	0.543	0.293	4.51457e-87	Epha3	dOFTm	Two-sided Wilcoxon test	0.25	25
1.4333e-164	0.804903	0.927	0.594	3.36597e-160	Tenm3	dOFTm	Two-sided Wilcoxon test	0.25	25
4.75587e-144	0.797365	0.293	0.08	1.11687e-139	Khdrbs2	dOFTm	Two-sided Wilcoxon test	0.25	25
2.32661e-102	0.793852	0.757	0.53	5.46382e-98	Klf12	dOFTm	Two-sided Wilcoxon test	0.25	25
1.11031e-108	0.782755	0.827	0.616	2.60746e-104	Setbp1	dOFTm	Two-sided Wilcoxon test	0.25	25
9.1672e-107	0.7791	0.735	0.544	2.15282e-102	Pitpnc1	dOFTm	Two-sided Wilcoxon test	0.25	25
6.32455e-118	0.77544	0.522	0.262	1.48526e-113	Cped1	dOFTm	Two-sided Wilcoxon test	0.25	25
1.44512e-68	0.764502	0.696	0.56	3.39371e-64	5330438D12Rik	dOFTm	Two-sided Wilcoxon test	0.25	25
6.11714e-114	0.762021	0.703	0.413	1.43655e-109	Robo2	dOFTm	Two-sided Wilcoxon test	0.25	25
1.18285e-82	0.758623	0.601	0.375	2.7778e-78	Aff2	dOFTm	Two-sided Wilcoxon test	0.25	25
7.15129e-152	0.752968	0.526	0.246	1.67941e-147	Fndc3c1	dOFTm	Two-sided Wilcoxon test	0.25	25
1.45007e-85	0.749943	0.519	0.288	3.40535e-81	Sema5a	dOFTm	Two-sided Wilcoxon test	0.25	25
1.34243e-110	0.747599	0.6	0.395	3.15257e-106	Tle1	dOFTm	Two-sided Wilcoxon test	0.25	25
1.12885e-77	0.745142	0.628	0.454	2.65099e-73	Tns3	dOFTm	Two-sided Wilcoxon test	0.25	25
1.69234e-39	0.742307	0.62	0.577	3.97429e-35	Rps6ka3	dOFTm	Two-sided Wilcoxon test	0.25	25
1.5565e-108	0.741277	0.809	0.605	3.65528e-104	Arhgap28	dOFTm	Two-sided Wilcoxon test	0.25	25
1.43526e-111	0.737041	0.712	0.482	3.37057e-107	Fmnl2	dOFTm	Two-sided Wilcoxon test	0.25	25
2.646e-81	0.735368	0.604	0.396	6.21385e-77	5730522E02Rik	dOFTm	Two-sided Wilcoxon test	0.25	25
3.73653e-89	0.732706	0.75	0.498	8.77488e-85	Adgrl3	dOFTm	Two-sided Wilcoxon test	0.25	25
2.23683e-106	0.71095	0.827	0.68	5.25296e-102	Ssbp2	dOFTm	Two-sided Wilcoxon test	0.25	25
8.11971e-88	0.704239	0.661	0.416	1.90683e-83	Sulf1	dOFTm	Two-sided Wilcoxon test	0.25	25
2.97791e-84	0.692455	0.631	0.491	6.99333e-80	Cd24a	dOFTm	Two-sided Wilcoxon test	0.25	25
3.0258e-81	0.688493	0.564	0.379	7.10579e-77	Kctd1	dOFTm	Two-sided Wilcoxon test	0.25	25
7.03286e-91	0.687376	0.828	0.669	1.6516e-86	Maml3	dOFTm	Two-sided Wilcoxon test	0.25	25
1.29876e-126	0.685781	0.707	0.477	3.05001e-122	Chd3	dOFTm	Two-sided Wilcoxon test	0.25	25
4.26499e-75	0.685565	0.679	0.512	1.00159e-70	Cachd1	dOFTm	Two-sided Wilcoxon test	0.25	25
1.18238e-105	0.683035	0.604	0.339	2.7767e-101	Zfhx4	dOFTm	Two-sided Wilcoxon test	0.25	25
1.46626e-67	0.681085	0.752	0.649	3.44336e-63	Fgfr2	dOFTm	Two-sided Wilcoxon test	0.25	25
3.02629e-135	0.676263	0.6	0.315	7.10693e-131	Clmp	dOFTm	Two-sided Wilcoxon test	0.25	25
6.28893e-89	0.668758	0.787	0.563	1.47689e-84	Hmcn1	dOFTm	Two-sided Wilcoxon test	0.25	25
6.783e-92	0.664687	0.746	0.557	1.59292e-87	Tcf7l1	dOFTm	Two-sided Wilcoxon test	0.25	25
1.01767e-97	0.66444	0.702	0.502	2.3899e-93	Zfp618	dOFTm	Two-sided Wilcoxon test	0.25	25
2.98259e-103	0.653857	0.916	0.777	7.00432e-99	Foxp1	dOFTm	Two-sided Wilcoxon test	0.25	25
8.40911e-64	0.65326	0.808	0.699	1.97479e-59	Zbtb20	dOFTm	Two-sided Wilcoxon test	0.25	25
9.77946e-122	0.650058	0.465	0.215	2.29661e-117	Lrig3	dOFTm	Two-sided Wilcoxon test	0.25	25
1.12332e-56	0.649336	0.428	0.261	2.638e-52	Sobp	dOFTm	Two-sided Wilcoxon test	0.25	25
1.39663e-91	0.648929	0.628	0.425	3.27985e-87	Map2k6	dOFTm	Two-sided Wilcoxon test	0.25	25
3.34908e-44	0.648866	0.488	0.366	7.86498e-40	Pag1	dOFTm	Two-sided Wilcoxon test	0.25	25
1.27176e-126	0.647579	0.256	0.069	2.9866e-122	Irx1	dOFTm	Two-sided Wilcoxon test	0.25	25
8.1744e-58	0.645544	0.524	0.338	1.91968e-53	Dach1	dOFTm	Two-sided Wilcoxon test	0.25	25
1.29974e-63	0.644377	0.57	0.395	3.05231e-59	Sema6a	dOFTm	Two-sided Wilcoxon test	0.25	25
5.27147e-84	0.64371	0.607	0.405	1.23795e-79	Asxl3	dOFTm	Two-sided Wilcoxon test	0.25	25
2.46459e-89	0.643588	0.878	0.654	5.78785e-85	Ptprd	dOFTm	Two-sided Wilcoxon test	0.25	25
3.06925e-107	0.638654	0.91	0.744	7.20782e-103	Tcf4	dOFTm	Two-sided Wilcoxon test	0.25	25
1.24525e-105	0.637899	0.917	0.865	2.92435e-101	Mdk	dOFTm	Two-sided Wilcoxon test	0.25	25
5.81031e-95	0.635032	0.825	0.641	1.36449e-90	Ttc28	dOFTm	Two-sided Wilcoxon test	0.25	25
3.88692e-101	0.628992	0.803	0.66	9.12805e-97	Kdm5b	dOFTm	Two-sided Wilcoxon test	0.25	25
1.11444e-106	0.628989	0.91	0.788	2.61715e-102	Baz2b	dOFTm	Two-sided Wilcoxon test	0.25	25
2.07757e-76	0.628004	0.727	0.577	4.87897e-72	Plekha5	dOFTm	Two-sided Wilcoxon test	0.25	25
1.40347e-106	0.626576	0.555	0.297	3.29591e-102	Col26a1	dOFTm	Two-sided Wilcoxon test	0.25	25
2.55959e-94	0.626134	0.62	0.373	6.01094e-90	Gli2	dOFTm	Two-sided Wilcoxon test	0.25	25
8.75509e-69	0.619758	0.299	0.132	2.05605e-64	Prr16	dOFTm	Two-sided Wilcoxon test	0.25	25
2.94992e-68	0.614856	0.726	0.529	6.9276e-64	Mpped2	dOFTm	Two-sided Wilcoxon test	0.25	25
2.53393e-21	0.613927	0.364	0.274	5.95069e-17	Plcl1	dOFTm	Two-sided Wilcoxon test	0.25	25
3.90075e-83	0.61228	0.475	0.245	9.16051e-79	Prrx1	dOFTm	Two-sided Wilcoxon test	0.25	25
2.18601e-71	0.610027	0.557	0.383	5.13362e-67	C530008M17Rik	dOFTm	Two-sided Wilcoxon test	0.25	25
1.48475e-83	0.60622	0.759	0.628	3.48679e-79	Slc4a7	dOFTm	Two-sided Wilcoxon test	0.25	25
9.12666e-91	0.606007	0.688	0.537	2.1433e-86	H2afy2	dOFTm	Two-sided Wilcoxon test	0.25	25
1.34737e-49	0.605031	0.481	0.321	3.16416e-45	Epha4	dOFTm	Two-sided Wilcoxon test	0.25	25
1.64757e-48	0.603705	0.287	0.148	3.86915e-44	Gm48742	dOFTm	Two-sided Wilcoxon test	0.25	25
7.36782e-47	0.600335	0.55	0.382	1.73026e-42	Sema3a	dOFTm	Two-sided Wilcoxon test	0.25	25
3.54126e-78	0.599341	0.768	0.584	8.3163e-74	Adgrl2	dOFTm	Two-sided Wilcoxon test	0.25	25
8.65573e-66	0.597896	0.679	0.546	2.03271e-61	Tmem131l	dOFTm	Two-sided Wilcoxon test	0.25	25
2.27686e-83	0.590164	0.711	0.545	5.34697e-79	Hdgfl3	dOFTm	Two-sided Wilcoxon test	0.25	25
3.30556e-80	0.589417	0.651	0.46	7.76277e-76	Arhgap42	dOFTm	Two-sided Wilcoxon test	0.25	25
1.44878e-12	0.588967	0.436	0.396	3.40231e-08	Il1rapl1	dOFTm	Two-sided Wilcoxon test	0.25	25
5.64465e-88	0.58871	0.777	0.56	1.32559e-83	Gli3	dOFTm	Two-sided Wilcoxon test	0.25	25
1.85908e-68	0.58214	0.531	0.303	4.36586e-64	Bnc2	dOFTm	Two-sided Wilcoxon test	0.25	25
4.44828e-87	0.580879	0.768	0.628	1.04463e-82	Rhobtb3	dOFTm	Two-sided Wilcoxon test	0.25	25
1.51031e-73	0.580724	0.912	0.687	3.54682e-69	Mir99ahg	dOFTm	Two-sided Wilcoxon test	0.25	25
3.16184e-57	0.580587	0.576	0.402	7.42526e-53	Mmp16	dOFTm	Two-sided Wilcoxon test	0.25	25
6.4727e-106	0.580432	0.942	0.82	1.52005e-101	Tcf12	dOFTm	Two-sided Wilcoxon test	0.25	25
2.91335e-64	0.576863	0.791	0.709	6.84172e-60	Tcf7l2	dOFTm	Two-sided Wilcoxon test	0.25	25
5.6561e-88	0.573433	0.816	0.722	1.32828e-83	Tnrc6a	dOFTm	Two-sided Wilcoxon test	0.25	25
1.1346e-81	0.572911	0.878	0.726	2.66448e-77	Hmga2	dOFTm	Two-sided Wilcoxon test	0.25	25
1.34073e-127	0.572336	0.314	0.097	3.14857e-123	Fendrr	dOFTm	Two-sided Wilcoxon test	0.25	25
1.08597e-80	0.567797	0.796	0.613	2.55028e-76	Zfp462	dOFTm	Two-sided Wilcoxon test	0.25	25
5.82331e-97	0.567329	0.842	0.733	1.36755e-92	Ptbp2	dOFTm	Two-sided Wilcoxon test	0.25	25
9.18826e-99	0.567221	0.897	0.788	2.15777e-94	Kansl1	dOFTm	Two-sided Wilcoxon test	0.25	25
3.11089e-91	0.565992	0.873	0.619	7.30562e-87	Efna5	dOFTm	Two-sided Wilcoxon test	0.25	25
5.10384e-88	0.565147	0.337	0.141	1.19859e-83	Isl1	dOFTm	Two-sided Wilcoxon test	0.25	25
8.61519e-39	0.564684	0.575	0.444	2.02319e-34	Lhfpl2	dOFTm	Two-sided Wilcoxon test	0.25	25
4.5125e-82	0.563497	0.77	0.603	1.05972e-77	Basp1	dOFTm	Two-sided Wilcoxon test	0.25	25
2.22135e-69	0.562714	0.746	0.649	5.21662e-65	Peli1	dOFTm	Two-sided Wilcoxon test	0.25	25
1.48898e-87	0.561192	0.975	0.774	3.49672e-83	Auts2	dOFTm	Two-sided Wilcoxon test	0.25	25
4.94384e-88	0.561171	0.828	0.682	1.16101e-83	Dock7	dOFTm	Two-sided Wilcoxon test	0.25	25
9.5876e-74	0.560898	0.797	0.668	2.25155e-69	Phf21a	dOFTm	Two-sided Wilcoxon test	0.25	25
1.26161e-48	0.559483	0.727	0.56	2.96277e-44	Pdzrn3	dOFTm	Two-sided Wilcoxon test	0.25	25
3.217e-33	0.55885	0.666	0.615	7.5548e-29	Tle4	dOFTm	Two-sided Wilcoxon test	0.25	25
1.29864e-30	0.55537	0.763	0.711	3.04974e-26	Pbx3	dOFTm	Two-sided Wilcoxon test	0.25	25
1.78196e-44	0.554598	0.658	0.591	4.18476e-40	Cspp1	dOFTm	Two-sided Wilcoxon test	0.25	25
5.70325e-141	0.554523	0.36	0.117	1.33935e-136	Foxf1	dOFTm	Two-sided Wilcoxon test	0.25	25
8.79701e-28	0.553129	0.54	0.434	2.06589e-23	Adamts9	dOFTm	Two-sided Wilcoxon test	0.25	25
2.003e-56	0.548269	0.677	0.53	4.70385e-52	Gm4258	dOFTm	Two-sided Wilcoxon test	0.25	25
1.24373e-91	0.546987	0.349	0.146	2.92078e-87	Map2	dOFTm	Two-sided Wilcoxon test	0.25	25
1.96046e-45	0.54474	0.661	0.512	4.60394e-41	Ror2	dOFTm	Two-sided Wilcoxon test	0.25	25
3.34797e-37	0.538829	0.528	0.41	7.86238e-33	Ppm1l	dOFTm	Two-sided Wilcoxon test	0.25	25
3.59967e-113	0.538461	0.906	0.796	8.45346e-109	Ttc3	dOFTm	Two-sided Wilcoxon test	0.25	25
1.87629e-76	0.536198	0.816	0.748	4.40627e-72	Cpsf6	dOFTm	Two-sided Wilcoxon test	0.25	25
1.67216e-58	0.5347	0.686	0.589	3.92689e-54	Pde7a	dOFTm	Two-sided Wilcoxon test	0.25	25
1.82176e-57	0.532851	0.705	0.581	4.27822e-53	Arl5b	dOFTm	Two-sided Wilcoxon test	0.25	25
1.6073e-44	0.532478	0.489	0.346	3.7746e-40	Fat4	dOFTm	Two-sided Wilcoxon test	0.25	25
2.63684e-64	0.531947	0.766	0.675	6.19235e-60	Usp3	dOFTm	Two-sided Wilcoxon test	0.25	25
1.6252e-83	0.530439	0.897	0.606	3.81661e-79	Cdh11	dOFTm	Two-sided Wilcoxon test	0.25	25
6.11084e-57	0.529907	0.688	0.556	1.43507e-52	Cblb	dOFTm	Two-sided Wilcoxon test	0.25	25
5.96303e-37	0.528658	0.633	0.481	1.40036e-32	Prickle2	dOFTm	Two-sided Wilcoxon test	0.25	25
9.46632e-87	0.528069	0.873	0.801	2.22307e-82	Pum1	dOFTm	Two-sided Wilcoxon test	0.25	25
2.25334e-65	0.527089	0.823	0.66	5.29173e-61	Farp1	dOFTm	Two-sided Wilcoxon test	0.25	25
3.61301e-47	0.526039	0.528	0.371	8.48479e-43	Fam110b	dOFTm	Two-sided Wilcoxon test	0.25	25
1.4252e-42	0.525738	0.657	0.588	3.34695e-38	Ldhb	dOFTm	Two-sided Wilcoxon test	0.25	25
2.23893e-83	0.524929	0.887	0.799	5.25791e-79	Arih1	dOFTm	Two-sided Wilcoxon test	0.25	25
1.4117e-72	0.522328	0.871	0.697	3.31524e-68	Pard3	dOFTm	Two-sided Wilcoxon test	0.25	25
2.69961e-28	0.520948	0.362	0.249	6.33975e-24	Lama2	dOFTm	Two-sided Wilcoxon test	0.25	25
8.04221e-71	0.520794	0.272	0.111	1.88863e-66	Rerg	dOFTm	Two-sided Wilcoxon test	0.25	25
1.74717e-74	0.519882	0.447	0.243	4.10305e-70	Cnksr2	dOFTm	Two-sided Wilcoxon test	0.25	25
2.59953e-112	0.519583	0.429	0.189	6.10475e-108	Twist2	dOFTm	Two-sided Wilcoxon test	0.25	25
5.19371e-68	0.519201	0.749	0.653	1.21969e-63	Evl	dOFTm	Two-sided Wilcoxon test	0.25	25
3.55722e-68	0.517384	0.781	0.789	8.35378e-64	H2afv	dOFTm	Two-sided Wilcoxon test	0.25	25
2.55736e-39	0.516358	0.319	0.187	6.00571e-35	Zfp536	dOFTm	Two-sided Wilcoxon test	0.25	25
9.28046e-57	0.51613	0.262	0.114	2.17942e-52	Rspo2	dOFTm	Two-sided Wilcoxon test	0.25	25
9.84962e-64	0.515955	0.805	0.712	2.31308e-59	Chd6	dOFTm	Two-sided Wilcoxon test	0.25	25
1.15279e-46	0.508853	0.684	0.597	2.70721e-42	Klhdc10	dOFTm	Two-sided Wilcoxon test	0.25	25
6.65699e-99	0.506676	0.967	0.905	1.56333e-94	Grb10	dOFTm	Two-sided Wilcoxon test	0.25	25
5.60217e-60	0.506411	0.586	0.42	1.31561e-55	Sulf2	dOFTm	Two-sided Wilcoxon test	0.25	25
1.89354e-92	0.506065	0.806	0.487	4.4468e-88	Slit3	dOFTm	Two-sided Wilcoxon test	0.25	25
3.21312e-74	0.505761	0.793	0.661	7.5457e-70	Fnbp1l	dOFTm	Two-sided Wilcoxon test	0.25	25
1.83221e-86	0.505021	0.342	0.147	4.30275e-82	Lix1	dOFTm	Two-sided Wilcoxon test	0.25	25
8.0303e-24	0.502918	0.305	0.208	1.88584e-19	Prdm6	dOFTm	Two-sided Wilcoxon test	0.25	25
6.96478e-62	0.500421	0.833	0.696	1.63561e-57	Akt3	dOFTm	Two-sided Wilcoxon test	0.25	25
9.33581e-69	0.499111	0.819	0.764	2.19242e-64	Phip	dOFTm	Two-sided Wilcoxon test	0.25	25
7.26482e-44	0.499063	0.738	0.65	1.70607e-39	Rfx3	dOFTm	Two-sided Wilcoxon test	0.25	25
3.11919e-47	0.498789	0.409	0.269	7.32511e-43	Tspan12	dOFTm	Two-sided Wilcoxon test	0.25	25
2.76579e-76	0.498089	0.426	0.214	6.49518e-72	Prdm16	dOFTm	Two-sided Wilcoxon test	0.25	25
3.76787e-77	0.496613	0.859	0.722	8.84846e-73	Map4k4	dOFTm	Two-sided Wilcoxon test	0.25	25
5.59867e-125	0.495895	0.261	0.07	1.31479e-120	Gm16000	dOFTm	Two-sided Wilcoxon test	0.25	25
3.23647e-72	0.494407	0.442	0.249	7.60053e-68	St8sia2	dOFTm	Two-sided Wilcoxon test	0.25	25
1.11842e-53	0.494249	0.629	0.506	2.62649e-49	Tmeff1	dOFTm	Two-sided Wilcoxon test	0.25	25
2.87115e-76	0.49345	0.25	0.096	6.7426e-72	Col9a2	dOFTm	Two-sided Wilcoxon test	0.25	25
3.76664e-51	0.491814	0.721	0.646	8.84558e-47	Ctdspl2	dOFTm	Two-sided Wilcoxon test	0.25	25
5.35547e-44	0.489793	0.784	0.723	1.25768e-39	Rev3l	dOFTm	Two-sided Wilcoxon test	0.25	25
1.08328e-83	0.48863	0.278	0.105	2.54397e-79	Tmtc1	dOFTm	Two-sided Wilcoxon test	0.25	25
5.77866e-51	0.488264	0.538	0.36	1.35706e-46	Fli1	dOFTm	Two-sided Wilcoxon test	0.25	25
1.76354e-107	0.488158	0.47	0.218	4.1415e-103	Crabp2	dOFTm	Two-sided Wilcoxon test	0.25	25
9.15286e-49	0.487868	0.3	0.159	2.14946e-44	4930517O19Rik	dOFTm	Two-sided Wilcoxon test	0.25	25
5.28966e-46	0.486872	0.36	0.2	1.24222e-41	Lsamp	dOFTm	Two-sided Wilcoxon test	0.25	25
2.15349e-43	0.486524	0.366	0.218	5.05727e-39	Synpo2	dOFTm	Two-sided Wilcoxon test	0.25	25
2.68209e-49	0.48268	0.447	0.295	6.29862e-45	Arnt2	dOFTm	Two-sided Wilcoxon test	0.25	25
1.91324e-57	0.482667	0.564	0.414	4.49305e-53	Fgfr1	dOFTm	Two-sided Wilcoxon test	0.25	25
1.26782e-47	0.481421	0.759	0.664	2.97734e-43	Luzp1	dOFTm	Two-sided Wilcoxon test	0.25	25
1.50676e-49	0.480091	0.375	0.219	3.53847e-45	Cux2	dOFTm	Two-sided Wilcoxon test	0.25	25
9.83237e-55	0.479618	0.815	0.747	2.30903e-50	Zfp644	dOFTm	Two-sided Wilcoxon test	0.25	25
1.28871e-25	0.47951	0.596	0.51	3.02641e-21	Nr6a1	dOFTm	Two-sided Wilcoxon test	0.25	25
1.71068e-53	0.479502	0.438	0.267	4.01736e-49	Frem1	dOFTm	Two-sided Wilcoxon test	0.25	25
4.98286e-48	0.479374	0.506	0.351	1.17017e-43	Prtg	dOFTm	Two-sided Wilcoxon test	0.25	25
4.22794e-69	0.478879	0.486	0.305	9.9289e-65	Dact1	dOFTm	Two-sided Wilcoxon test	0.25	25
1.81173e-44	0.476386	0.631	0.535	4.25466e-40	Bcl9	dOFTm	Two-sided Wilcoxon test	0.25	25
5.52472e-76	0.474503	0.889	0.687	1.29743e-71	Fbn2	dOFTm	Two-sided Wilcoxon test	0.25	25
2.1302e-55	0.472486	0.826	0.712	5.00256e-51	Gnaq	dOFTm	Two-sided Wilcoxon test	0.25	25
3.81745e-26	0.467951	0.426	0.308	8.96489e-22	Rnf150	dOFTm	Two-sided Wilcoxon test	0.25	25
3.76798e-40	0.467767	0.658	0.543	8.84873e-36	Zfp827	dOFTm	Two-sided Wilcoxon test	0.25	25
4.24696e-51	0.466692	0.718	0.629	9.97356e-47	Tgfbr1	dOFTm	Two-sided Wilcoxon test	0.25	25
1.80598e-58	0.464571	0.805	0.69	4.24117e-54	Bmpr1a	dOFTm	Two-sided Wilcoxon test	0.25	25
4.81315e-85	0.464378	0.868	0.823	1.13032e-80	Fubp1	dOFTm	Two-sided Wilcoxon test	0.25	25
1.77071e-67	0.464155	0.858	0.841	4.15833e-63	Nasp	dOFTm	Two-sided Wilcoxon test	0.25	25
1.96866e-29	0.464076	0.453	0.336	4.62321e-25	B3galt1	dOFTm	Two-sided Wilcoxon test	0.25	25
1.3691e-47	0.46383	0.724	0.599	3.21519e-43	Myo1b	dOFTm	Two-sided Wilcoxon test	0.25	25
1.67373e-52	0.463042	0.378	0.221	3.93059e-48	Boc	dOFTm	Two-sided Wilcoxon test	0.25	25
1.64083e-55	0.462886	0.531	0.344	3.85332e-51	Pdgfra	dOFTm	Two-sided Wilcoxon test	0.25	25
6.31467e-41	0.462696	0.696	0.623	1.48294e-36	Lrp6	dOFTm	Two-sided Wilcoxon test	0.25	25
1.91933e-54	0.462642	0.615	0.447	4.50734e-50	Pkdcc	dOFTm	Two-sided Wilcoxon test	0.25	25
6.06245e-41	0.462005	0.72	0.638	1.42371e-36	Rbp1	dOFTm	Two-sided Wilcoxon test	0.25	25
6.88203e-36	0.460389	0.554	0.431	1.61618e-31	Stox2	dOFTm	Two-sided Wilcoxon test	0.25	25
3.89475e-62	0.46005	0.892	0.821	9.14643e-58	Stag1	dOFTm	Two-sided Wilcoxon test	0.25	25
2.73158e-77	0.460028	0.823	0.788	6.41485e-73	Hnrnpr	dOFTm	Two-sided Wilcoxon test	0.25	25
2.47736e-58	0.459999	0.854	0.616	5.81782e-54	Col3a1	dOFTm	Two-sided Wilcoxon test	0.25	25
2.26925e-61	0.459395	0.522	0.327	5.32911e-57	Antxr1	dOFTm	Two-sided Wilcoxon test	0.25	25
1.55152e-58	0.458761	0.823	0.745	3.64359e-54	Crebbp	dOFTm	Two-sided Wilcoxon test	0.25	25
6.01203e-56	0.4587	0.657	0.523	1.41187e-51	Dbn1	dOFTm	Two-sided Wilcoxon test	0.25	25
2.94956e-29	0.458326	0.389	0.261	6.92675e-25	Tmem132c	dOFTm	Two-sided Wilcoxon test	0.25	25
7.9427e-31	0.457494	0.61	0.516	1.86526e-26	Zfp532	dOFTm	Two-sided Wilcoxon test	0.25	25
1.64792e-51	0.457321	0.775	0.709	3.86998e-47	Cnot2	dOFTm	Two-sided Wilcoxon test	0.25	25
4.06798e-59	0.457296	0.797	0.721	9.55324e-55	Ehmt1	dOFTm	Two-sided Wilcoxon test	0.25	25
8.54579e-43	0.455279	0.809	0.728	2.00689e-38	Strbp	dOFTm	Two-sided Wilcoxon test	0.25	25
1.10572e-45	0.453801	0.762	0.603	2.59667e-41	Bach2	dOFTm	Two-sided Wilcoxon test	0.25	25
8.73751e-30	0.453094	0.686	0.597	2.05192e-25	Cers6	dOFTm	Two-sided Wilcoxon test	0.25	25
4.44823e-50	0.452948	0.79	0.656	1.04462e-45	Dip2c	dOFTm	Two-sided Wilcoxon test	0.25	25
2.19598e-24	0.452392	0.369	0.261	5.15703e-20	Klhl29	dOFTm	Two-sided Wilcoxon test	0.25	25
2.908e-16	0.452249	0.271	0.192	6.82916e-12	Col12a1	dOFTm	Two-sided Wilcoxon test	0.25	25
2.08869e-77	0.450917	0.837	0.682	4.90507e-73	Enah	dOFTm	Two-sided Wilcoxon test	0.25	25
3.43338e-52	0.447137	0.765	0.686	8.06295e-48	Zmym4	dOFTm	Two-sided Wilcoxon test	0.25	25
8.87292e-57	0.445958	0.866	0.802	2.08372e-52	Arid4b	dOFTm	Two-sided Wilcoxon test	0.25	25
1.87431e-38	0.44533	0.504	0.358	4.40162e-34	Limch1	dOFTm	Two-sided Wilcoxon test	0.25	25
1.35603e-17	0.44393	0.389	0.31	3.18451e-13	Gm35188	dOFTm	Two-sided Wilcoxon test	0.25	25
5.04705e-45	0.442847	0.732	0.666	1.18525e-40	Mbtd1	dOFTm	Two-sided Wilcoxon test	0.25	25
7.17076e-47	0.441734	0.754	0.7	1.68398e-42	Atad2b	dOFTm	Two-sided Wilcoxon test	0.25	25
6.07259e-65	0.43776	0.845	0.697	1.42609e-60	Rbfox2	dOFTm	Two-sided Wilcoxon test	0.25	25
7.60242e-51	0.436995	0.82	0.73	1.78535e-46	Arid1b	dOFTm	Two-sided Wilcoxon test	0.25	25
1.64039e-30	0.435534	0.649	0.596	3.85229e-26	Tcf20	dOFTm	Two-sided Wilcoxon test	0.25	25
1.34524e-42	0.435274	0.783	0.703	3.15916e-38	Fbxo11	dOFTm	Two-sided Wilcoxon test	0.25	25
7.20438e-07	0.434828	0.496	0.482	0.0169188	Lrrc4	dOFTm	Two-sided Wilcoxon test	0.25	25
5.4271e-46	0.434281	0.334	0.187	1.2745e-41	Sgip1	dOFTm	Two-sided Wilcoxon test	0.25	25
2.22173e-49	0.433869	0.4	0.244	5.2175e-45	Nr6a1os	dOFTm	Two-sided Wilcoxon test	0.25	25
1.03664e-27	0.433072	0.613	0.557	2.43444e-23	Rnf38	dOFTm	Two-sided Wilcoxon test	0.25	25
1.10385e-16	0.432247	0.528	0.491	2.59229e-12	Acvr2a	dOFTm	Two-sided Wilcoxon test	0.25	25
2.82695e-37	0.432242	0.722	0.673	6.63882e-33	Asxl1	dOFTm	Two-sided Wilcoxon test	0.25	25
1.8209e-38	0.431719	0.503	0.367	4.27619e-34	Iqgap2	dOFTm	Two-sided Wilcoxon test	0.25	25
6.30052e-58	0.430592	0.882	0.799	1.47961e-53	Igf1r	dOFTm	Two-sided Wilcoxon test	0.25	25
2.96282e-40	0.429418	0.558	0.443	6.95788e-36	Foxp4	dOFTm	Two-sided Wilcoxon test	0.25	25
1.94566e-32	0.42836	0.695	0.657	4.5692e-28	Xpo7	dOFTm	Two-sided Wilcoxon test	0.25	25
1.38571e-38	0.427785	0.729	0.666	3.2542e-34	Arid2	dOFTm	Two-sided Wilcoxon test	0.25	25
1.25335e-25	0.42773	0.302	0.195	2.94338e-21	Thsd7a	dOFTm	Two-sided Wilcoxon test	0.25	25
7.97217e-35	0.427252	0.635	0.553	1.87219e-30	Arhgap35	dOFTm	Two-sided Wilcoxon test	0.25	25
2.54953e-49	0.426883	0.542	0.357	5.98731e-45	Tshz3	dOFTm	Two-sided Wilcoxon test	0.25	25
4.26212e-22	0.426776	0.311	0.227	1.00092e-17	Pla2g4a	dOFTm	Two-sided Wilcoxon test	0.25	25
8.67838e-21	0.426745	0.693	0.686	2.03803e-16	Ccnd2	dOFTm	Two-sided Wilcoxon test	0.25	25
1.70995e-40	0.426668	0.746	0.66	4.01564e-36	Tmcc1	dOFTm	Two-sided Wilcoxon test	0.25	25
1.74404e-37	0.426632	0.571	0.459	4.09571e-33	Myo10	dOFTm	Two-sided Wilcoxon test	0.25	25
1.24486e-47	0.426533	0.474	0.321	2.92343e-43	Tes	dOFTm	Two-sided Wilcoxon test	0.25	25
1.02024e-67	0.425343	0.475	0.282	2.39594e-63	Pcdh18	dOFTm	Two-sided Wilcoxon test	0.25	25
5.84946e-62	0.425275	0.286	0.13	1.37369e-57	Scube1	dOFTm	Two-sided Wilcoxon test	0.25	25
1.39393e-40	0.424773	0.686	0.628	3.27349e-36	Zfp326	dOFTm	Two-sided Wilcoxon test	0.25	25
5.7435e-42	0.422033	0.36	0.216	1.3488e-37	Rims1	dOFTm	Two-sided Wilcoxon test	0.25	25
1.19555e-53	0.420169	0.857	0.636	2.80764e-49	Fbxl7	dOFTm	Two-sided Wilcoxon test	0.25	25
2.60074e-30	0.419275	0.596	0.484	6.10759e-26	Prkd1	dOFTm	Two-sided Wilcoxon test	0.25	25
5.40695e-32	0.416819	0.525	0.433	1.26977e-27	Adgra3	dOFTm	Two-sided Wilcoxon test	0.25	25
5.94099e-39	0.416475	0.754	0.716	1.39518e-34	Slc38a2	dOFTm	Two-sided Wilcoxon test	0.25	25
3.47381e-38	0.415691	0.411	0.284	8.15789e-34	D630045J12Rik	dOFTm	Two-sided Wilcoxon test	0.25	25
4.32647e-51	0.415302	0.813	0.747	1.01603e-46	Ssbp3	dOFTm	Two-sided Wilcoxon test	0.25	25
2.68313e-36	0.415239	0.578	0.496	6.30107e-32	Iqcb1	dOFTm	Two-sided Wilcoxon test	0.25	25
1.15008e-47	0.414548	0.724	0.725	2.70084e-43	Cbx1	dOFTm	Two-sided Wilcoxon test	0.25	25
5.13126e-39	0.414079	0.702	0.547	1.20503e-34	Tmtc2	dOFTm	Two-sided Wilcoxon test	0.25	25
6.95137e-51	0.413832	0.924	0.805	1.63246e-46	Rere	dOFTm	Two-sided Wilcoxon test	0.25	25
6.41832e-17	0.413293	0.466	0.366	1.50728e-12	Fat3	dOFTm	Two-sided Wilcoxon test	0.25	25
1.31017e-37	0.412963	0.591	0.495	3.07681e-33	Smo	dOFTm	Two-sided Wilcoxon test	0.25	25
6.33535e-27	0.41199	0.636	0.576	1.48779e-22	Cbfa2t2	dOFTm	Two-sided Wilcoxon test	0.25	25
6.67257e-38	0.411838	0.673	0.615	1.56699e-33	Tia1	dOFTm	Two-sided Wilcoxon test	0.25	25
4.41089e-47	0.411325	0.657	0.563	1.03585e-42	Tead2	dOFTm	Two-sided Wilcoxon test	0.25	25
2.06302e-28	0.411103	0.267	0.158	4.8448e-24	Dok6	dOFTm	Two-sided Wilcoxon test	0.25	25
8.8973e-07	0.410244	0.477	0.442	0.0208944	Pde3a	dOFTm	Two-sided Wilcoxon test	0.25	25
2.58762e-16	0.4101	0.521	0.465	6.07678e-12	Gm37240	dOFTm	Two-sided Wilcoxon test	0.25	25
1.60025e-32	0.409249	0.576	0.489	3.75803e-28	H1fx	dOFTm	Two-sided Wilcoxon test	0.25	25
1.36863e-25	0.409193	0.6	0.547	3.21409e-21	Mapk8	dOFTm	Two-sided Wilcoxon test	0.25	25
1.51332e-32	0.408481	0.64	0.534	3.55388e-28	Ptprs	dOFTm	Two-sided Wilcoxon test	0.25	25
3.53553e-30	0.408091	0.659	0.527	8.30284e-26	Rora	dOFTm	Two-sided Wilcoxon test	0.25	25
1.88082e-47	0.407867	0.821	0.762	4.41691e-43	Zfp292	dOFTm	Two-sided Wilcoxon test	0.25	25
5.36109e-26	0.406363	0.541	0.469	1.259e-21	Dhx40	dOFTm	Two-sided Wilcoxon test	0.25	25
1.42489e-26	0.406137	0.673	0.646	3.34621e-22	Brd8	dOFTm	Two-sided Wilcoxon test	0.25	25
4.81266e-66	0.405522	0.865	0.856	1.1302e-61	Sfpq	dOFTm	Two-sided Wilcoxon test	0.25	25
1.26169e-29	0.404544	0.681	0.606	2.96295e-25	Zdhhc20	dOFTm	Two-sided Wilcoxon test	0.25	25
8.26844e-92	0.403413	0.305	0.114	1.94176e-87	Rgs5	dOFTm	Two-sided Wilcoxon test	0.25	25
4.13297e-37	0.403349	0.688	0.626	9.70587e-33	Tnrc6c	dOFTm	Two-sided Wilcoxon test	0.25	25
2.53123e-41	0.402802	0.851	0.888	5.94434e-37	Stmn1	dOFTm	Two-sided Wilcoxon test	0.25	25
6.64116e-55	0.401903	0.81	0.792	1.55961e-50	Hnrnph1	dOFTm	Two-sided Wilcoxon test	0.25	25
2.00242e-31	0.401817	0.402	0.276	4.70247e-27	Sox9	dOFTm	Two-sided Wilcoxon test	0.25	25
3.46088e-39	0.401766	0.827	0.734	8.12752e-35	Foxn3	dOFTm	Two-sided Wilcoxon test	0.25	25
2.2934e-30	0.401683	0.534	0.453	5.38581e-26	Zfp280c	dOFTm	Two-sided Wilcoxon test	0.25	25
0.000448571	0.401023	0.256	0.225	1	Pcdh9	dOFTm	Two-sided Wilcoxon test	0.25	25
1.95357e-30	0.400787	0.501	0.396	4.58775e-26	Ldlrad3	dOFTm	Two-sided Wilcoxon test	0.25	25
5.68627e-61	0.400224	0.836	0.788	1.33536e-56	Smarcc1	dOFTm	Two-sided Wilcoxon test	0.25	25
1.91819e-37	0.399948	0.68	0.613	4.50468e-33	Zfp266	dOFTm	Two-sided Wilcoxon test	0.25	25
5.10512e-64	0.399263	0.323	0.156	1.19889e-59	Dnm3os	dOFTm	Two-sided Wilcoxon test	0.25	25
3.8432e-26	0.398755	0.629	0.517	9.02537e-22	Tgfb2	dOFTm	Two-sided Wilcoxon test	0.25	25
6.49963e-23	0.397513	0.64	0.6	1.52637e-18	Ptpn4	dOFTm	Two-sided Wilcoxon test	0.25	25
2.44108e-12	0.397502	0.523	0.481	5.73263e-08	Nedd4l	dOFTm	Two-sided Wilcoxon test	0.25	25
3.00992e-47	0.396995	0.865	0.81	7.06851e-43	Strn3	dOFTm	Two-sided Wilcoxon test	0.25	25
4.44871e-26	0.396802	0.793	0.659	1.04474e-21	Ptprk	dOFTm	Two-sided Wilcoxon test	0.25	25
1.17302e-42	0.396226	0.821	0.771	2.75473e-38	Tbl1x	dOFTm	Two-sided Wilcoxon test	0.25	25
1.80819e-71	0.3952	0.542	0.322	4.24636e-67	Mfap4	dOFTm	Two-sided Wilcoxon test	0.25	25
2.85908e-69	0.395047	0.944	0.91	6.71426e-65	Rbm39	dOFTm	Two-sided Wilcoxon test	0.25	25
1.46972e-37	0.394603	0.521	0.408	3.45149e-33	Fzd3	dOFTm	Two-sided Wilcoxon test	0.25	25
3.09924e-52	0.394542	0.79	0.629	7.27827e-48	Zfp521	dOFTm	Two-sided Wilcoxon test	0.25	25
2.49767e-44	0.39445	0.669	0.569	5.86553e-40	Gjc1	dOFTm	Two-sided Wilcoxon test	0.25	25
7.11864e-27	0.392619	0.565	0.482	1.67174e-22	Gtf2ird1	dOFTm	Two-sided Wilcoxon test	0.25	25
2.93489e-38	0.392518	0.79	0.649	6.89231e-34	Cdk14	dOFTm	Two-sided Wilcoxon test	0.25	25
1.53298e-40	0.392327	0.533	0.414	3.60005e-36	Mthfd2l	dOFTm	Two-sided Wilcoxon test	0.25	25
2.83467e-31	0.391885	0.699	0.647	6.65693e-27	Smurf2	dOFTm	Two-sided Wilcoxon test	0.25	25
1.8415e-28	0.391772	0.618	0.564	4.32459e-24	Lpin2	dOFTm	Two-sided Wilcoxon test	0.25	25
1.82182e-34	0.391532	0.833	0.728	4.27836e-30	Mbnl2	dOFTm	Two-sided Wilcoxon test	0.25	25
1.20731e-39	0.390652	0.808	0.776	2.83524e-35	Psme4	dOFTm	Two-sided Wilcoxon test	0.25	25
7.23708e-47	0.390606	0.82	0.771	1.69956e-42	Wac	dOFTm	Two-sided Wilcoxon test	0.25	25
9.2034e-24	0.390529	0.574	0.506	2.16133e-19	Tiam1	dOFTm	Two-sided Wilcoxon test	0.25	25
3.76353e-41	0.389774	0.781	0.722	8.83828e-37	Igf2bp3	dOFTm	Two-sided Wilcoxon test	0.25	25
1.81582e-28	0.38938	0.523	0.436	4.26427e-24	Igsf3	dOFTm	Two-sided Wilcoxon test	0.25	25
6.02292e-32	0.389248	0.792	0.712	1.41442e-27	Nf1	dOFTm	Two-sided Wilcoxon test	0.25	25
1.38825e-30	0.389223	0.601	0.507	3.26018e-26	Fam135a	dOFTm	Two-sided Wilcoxon test	0.25	25
5.67357e-40	0.388692	0.78	0.734	1.33238e-35	Arid1a	dOFTm	Two-sided Wilcoxon test	0.25	25
5.27203e-42	0.388464	0.779	0.685	1.23808e-37	Bmpr2	dOFTm	Two-sided Wilcoxon test	0.25	25
1.28318e-27	0.387848	0.484	0.39	3.01342e-23	Lrp12	dOFTm	Two-sided Wilcoxon test	0.25	25
1.18827e-34	0.386933	0.391	0.272	2.79054e-30	Neto2	dOFTm	Two-sided Wilcoxon test	0.25	25
9.04469e-23	0.386055	0.596	0.547	2.12405e-18	Atp11c	dOFTm	Two-sided Wilcoxon test	0.25	25
2.30883e-37	0.385945	0.737	0.712	5.42206e-33	Ezh2	dOFTm	Two-sided Wilcoxon test	0.25	25
8.36105e-21	0.385735	0.707	0.67	1.96351e-16	Dnajc1	dOFTm	Two-sided Wilcoxon test	0.25	25
4.35655e-33	0.385154	0.543	0.432	1.02309e-28	Chn1	dOFTm	Two-sided Wilcoxon test	0.25	25
2.88755e-56	0.383875	0.323	0.162	6.78112e-52	Astn1	dOFTm	Two-sided Wilcoxon test	0.25	25
3.52098e-36	0.38373	0.81	0.759	8.26867e-32	Kmt2c	dOFTm	Two-sided Wilcoxon test	0.25	25
4.47249e-23	0.382437	0.528	0.452	1.05032e-18	Dync2h1	dOFTm	Two-sided Wilcoxon test	0.25	25
3.28533e-24	0.382342	0.576	0.489	7.71526e-20	L3mbtl3	dOFTm	Two-sided Wilcoxon test	0.25	25
8.11407e-25	0.381497	0.653	0.612	1.90551e-20	Ireb2	dOFTm	Two-sided Wilcoxon test	0.25	25
1.01569e-31	0.381046	0.728	0.685	2.38526e-27	Scaf8	dOFTm	Two-sided Wilcoxon test	0.25	25
9.24102e-08	0.380698	0.312	0.271	0.00217016	Gm47271	dOFTm	Two-sided Wilcoxon test	0.25	25
9.95931e-51	0.380046	0.889	0.853	2.33884e-46	Fus	dOFTm	Two-sided Wilcoxon test	0.25	25
5.18233e-51	0.379819	0.831	0.796	1.21702e-46	Khdrbs1	dOFTm	Two-sided Wilcoxon test	0.25	25
6.60429e-30	0.378937	0.677	0.611	1.55095e-25	Pdcd4	dOFTm	Two-sided Wilcoxon test	0.25	25
4.76203e-76	0.378263	0.314	0.135	1.11831e-71	Kif5c	dOFTm	Two-sided Wilcoxon test	0.25	25
1.07322e-60	0.377263	0.305	0.147	2.52035e-56	Csrnp3	dOFTm	Two-sided Wilcoxon test	0.25	25
3.86257e-32	0.377077	0.708	0.672	9.07086e-28	Trim33	dOFTm	Two-sided Wilcoxon test	0.25	25
2.5742e-23	0.376995	0.558	0.493	6.04525e-19	Nck2	dOFTm	Two-sided Wilcoxon test	0.25	25
4.54542e-05	0.376868	0.263	0.237	1	Gm49267	dOFTm	Two-sided Wilcoxon test	0.25	25
1.06551e-42	0.376284	0.767	0.752	2.50225e-38	Ube2e3	dOFTm	Two-sided Wilcoxon test	0.25	25
3.48337e-25	0.375429	0.522	0.446	8.18034e-21	Rbm4b	dOFTm	Two-sided Wilcoxon test	0.25	25
1.74631e-06	0.375375	0.622	0.648	0.0410104	Mllt3	dOFTm	Two-sided Wilcoxon test	0.25	25
1.11773e-42	0.374261	0.657	0.5	2.62488e-38	Ank3	dOFTm	Two-sided Wilcoxon test	0.25	25
2.7322e-15	0.373352	0.621	0.617	6.41631e-11	Agps	dOFTm	Two-sided Wilcoxon test	0.25	25
5.49619e-68	0.372807	0.865	0.856	1.29073e-63	Hnrnpm	dOFTm	Two-sided Wilcoxon test	0.25	25
3.25588e-34	0.370934	0.772	0.741	7.64611e-30	Tnpo1	dOFTm	Two-sided Wilcoxon test	0.25	25
3.25785e-21	0.370905	0.276	0.185	7.65075e-17	Gm15563	dOFTm	Two-sided Wilcoxon test	0.25	25
9.07014e-20	0.37085	0.578	0.487	2.13003e-15	Nhsl2	dOFTm	Two-sided Wilcoxon test	0.25	25
3.09784e-34	0.370298	0.819	0.698	7.27497e-30	Atrnl1	dOFTm	Two-sided Wilcoxon test	0.25	25
7.15112e-38	0.369886	0.769	0.728	1.67937e-33	Rbm26	dOFTm	Two-sided Wilcoxon test	0.25	25
2.98259e-26	0.369766	0.266	0.163	7.00433e-22	Dpyd	dOFTm	Two-sided Wilcoxon test	0.25	25
1.74571e-23	0.369315	0.69	0.623	4.09962e-19	Rapgef2	dOFTm	Two-sided Wilcoxon test	0.25	25
2.38425e-42	0.369082	0.389	0.253	5.59916e-38	Tpd52l1	dOFTm	Two-sided Wilcoxon test	0.25	25
1.23523e-47	0.368509	0.83	0.818	2.90083e-43	Dhx9	dOFTm	Two-sided Wilcoxon test	0.25	25
1.56673e-39	0.368312	0.763	0.739	3.67932e-35	Tra2a	dOFTm	Two-sided Wilcoxon test	0.25	25
5.67431e-33	0.367412	0.751	0.69	1.33255e-28	Phf14	dOFTm	Two-sided Wilcoxon test	0.25	25
2.219e-23	0.367376	0.727	0.645	5.2111e-19	Ube2e2	dOFTm	Two-sided Wilcoxon test	0.25	25
1.60386e-15	0.367116	0.272	0.199	3.7665e-11	3110021N24Rik	dOFTm	Two-sided Wilcoxon test	0.25	25
1.1112e-49	0.366971	0.874	0.843	2.60953e-45	Atrx	dOFTm	Two-sided Wilcoxon test	0.25	25
1.22383e-35	0.366744	0.785	0.751	2.87404e-31	Gpatch8	dOFTm	Two-sided Wilcoxon test	0.25	25
3.07014e-24	0.366341	0.627	0.552	7.20992e-20	Zfyve9	dOFTm	Two-sided Wilcoxon test	0.25	25
4.68709e-19	0.366043	0.71	0.689	1.10072e-14	Bbx	dOFTm	Two-sided Wilcoxon test	0.25	25
2.71775e-35	0.365733	0.42	0.301	6.38236e-31	Rps6ka6	dOFTm	Two-sided Wilcoxon test	0.25	25
2.79211e-30	0.364589	0.267	0.159	6.557e-26	Sned1	dOFTm	Two-sided Wilcoxon test	0.25	25
1.28812e-23	0.364447	0.62	0.566	3.02503e-19	Znrf1	dOFTm	Two-sided Wilcoxon test	0.25	25
1.25616e-18	0.364347	0.583	0.524	2.94996e-14	Znrf3	dOFTm	Two-sided Wilcoxon test	0.25	25
6.75475e-29	0.364079	0.664	0.614	1.58629e-24	Zmym2	dOFTm	Two-sided Wilcoxon test	0.25	25
1.92503e-30	0.363534	0.753	0.646	4.52074e-26	Zswim6	dOFTm	Two-sided Wilcoxon test	0.25	25
1.73885e-40	0.363362	0.706	0.68	4.08352e-36	Ilf2	dOFTm	Two-sided Wilcoxon test	0.25	25
3.16507e-55	0.362213	0.4	0.241	7.43286e-51	Foxc1	dOFTm	Two-sided Wilcoxon test	0.25	25
5.57328e-15	0.36132	0.532	0.506	1.30883e-10	Exoc2	dOFTm	Two-sided Wilcoxon test	0.25	25
3.24638e-34	0.361285	0.569	0.459	7.6238e-30	Fzd2	dOFTm	Two-sided Wilcoxon test	0.25	25
8.85881e-27	0.361149	0.382	0.281	2.0804e-22	Gas2	dOFTm	Two-sided Wilcoxon test	0.25	25
3.87562e-30	0.361088	0.764	0.717	9.10151e-26	Pds5b	dOFTm	Two-sided Wilcoxon test	0.25	25
2.31911e-24	0.360923	0.643	0.591	5.44619e-20	Nrf1	dOFTm	Two-sided Wilcoxon test	0.25	25
1.83223e-13	0.360357	0.262	0.186	4.30282e-09	Kcnb2	dOFTm	Two-sided Wilcoxon test	0.25	25
1.18563e-26	0.359813	0.695	0.658	2.78434e-22	Zmynd11	dOFTm	Two-sided Wilcoxon test	0.25	25
1.29415e-15	0.358985	0.346	0.263	3.03918e-11	Adamtsl1	dOFTm	Two-sided Wilcoxon test	0.25	25
8.91811e-21	0.358488	0.659	0.579	2.09433e-16	Trerf1	dOFTm	Two-sided Wilcoxon test	0.25	25
1.57354e-19	0.358484	0.675	0.608	3.6953e-15	Cask	dOFTm	Two-sided Wilcoxon test	0.25	25
7.4945e-48	0.357421	0.48	0.305	1.76001e-43	Zfp503	dOFTm	Two-sided Wilcoxon test	0.25	25
3.51076e-25	0.357372	0.651	0.61	8.24466e-21	Epc2	dOFTm	Two-sided Wilcoxon test	0.25	25
1.23023e-11	0.357331	0.581	0.509	2.88906e-07	Cacna2d1	dOFTm	Two-sided Wilcoxon test	0.25	25
6.16847e-31	0.356979	0.588	0.492	1.4486e-26	Sesn3	dOFTm	Two-sided Wilcoxon test	0.25	25
2.7471e-23	0.356321	0.478	0.384	6.45128e-19	Myo1e	dOFTm	Two-sided Wilcoxon test	0.25	25
8.54824e-23	0.35619	0.398	0.285	2.00747e-18	Ldb2	dOFTm	Two-sided Wilcoxon test	0.25	25
7.41568e-18	0.356176	0.464	0.398	1.7415e-13	Gm49692	dOFTm	Two-sided Wilcoxon test	0.25	25
6.40311e-18	0.355987	0.26	0.181	1.50371e-13	Rsf1os1	dOFTm	Two-sided Wilcoxon test	0.25	25
7.63888e-26	0.355981	0.69	0.644	1.79392e-21	Trim24	dOFTm	Two-sided Wilcoxon test	0.25	25
9.57992e-09	0.355835	0.36	0.315	0.000224975	Plxna2	dOFTm	Two-sided Wilcoxon test	0.25	25
1.50323e-25	0.355361	0.569	0.51	3.53018e-21	Ankrd10	dOFTm	Two-sided Wilcoxon test	0.25	25
3.5748e-12	0.354348	0.328	0.26	8.39505e-08	Parm1	dOFTm	Two-sided Wilcoxon test	0.25	25
2.0882e-28	0.354256	0.594	0.527	4.90394e-24	Ube2e1	dOFTm	Two-sided Wilcoxon test	0.25	25
5.27424e-13	0.353677	0.307	0.235	1.2386e-08	Piezo2	dOFTm	Two-sided Wilcoxon test	0.25	25
6.37337e-39	0.353608	0.411	0.276	1.49672e-34	Notch3	dOFTm	Two-sided Wilcoxon test	0.25	25
1.4438e-23	0.353354	0.647	0.586	3.39063e-19	Cbfb	dOFTm	Two-sided Wilcoxon test	0.25	25
4.12845e-27	0.352327	0.664	0.629	9.69526e-23	Mtf2	dOFTm	Two-sided Wilcoxon test	0.25	25
9.13297e-23	0.351907	0.686	0.645	2.14479e-18	Ambra1	dOFTm	Two-sided Wilcoxon test	0.25	25
1.58457e-27	0.351879	0.456	0.34	3.72121e-23	Mrc2	dOFTm	Two-sided Wilcoxon test	0.25	25
6.9205e-24	0.351802	0.718	0.678	1.62521e-19	Epc1	dOFTm	Two-sided Wilcoxon test	0.25	25
3.24474e-16	0.350137	0.527	0.48	7.61996e-12	Kansl1l	dOFTm	Two-sided Wilcoxon test	0.25	25
5.4431e-16	0.349727	0.455	0.389	1.27826e-11	Tshz1	dOFTm	Two-sided Wilcoxon test	0.25	25
1.74987e-33	0.349626	0.387	0.266	4.10938e-29	Spaca6	dOFTm	Two-sided Wilcoxon test	0.25	25
2.65391e-13	0.348985	0.42	0.374	6.23244e-09	Proser1	dOFTm	Two-sided Wilcoxon test	0.25	25
9.13147e-23	0.34876	0.643	0.584	2.14443e-18	Yeats2	dOFTm	Two-sided Wilcoxon test	0.25	25
1.76235e-30	0.346668	0.766	0.743	4.13869e-26	Pnisr	dOFTm	Two-sided Wilcoxon test	0.25	25
2.24595e-25	0.346322	0.612	0.534	5.27438e-21	Yap1	dOFTm	Two-sided Wilcoxon test	0.25	25
2.57432e-27	0.345597	0.731	0.682	6.04553e-23	Gatad2b	dOFTm	Two-sided Wilcoxon test	0.25	25
2.7968e-24	0.345066	0.538	0.431	6.568e-20	Zfp423	dOFTm	Two-sided Wilcoxon test	0.25	25
6.67202e-34	0.34434	0.428	0.293	1.56686e-29	St6gal1	dOFTm	Two-sided Wilcoxon test	0.25	25
1.78442e-24	0.343844	0.618	0.538	4.19054e-20	Asap2	dOFTm	Two-sided Wilcoxon test	0.25	25
3.32084e-22	0.342939	0.476	0.397	7.79866e-18	Stxbp4	dOFTm	Two-sided Wilcoxon test	0.25	25
5.56889e-18	0.342609	0.369	0.288	1.3078e-13	Mlf1	dOFTm	Two-sided Wilcoxon test	0.25	25
1.42891e-22	0.342515	0.46	0.365	3.35565e-18	Pik3r3	dOFTm	Two-sided Wilcoxon test	0.25	25
1.22539e-22	0.342012	0.548	0.471	2.87771e-18	Rnf130	dOFTm	Two-sided Wilcoxon test	0.25	25
2.72856e-18	0.341911	0.541	0.481	6.40774e-14	Scai	dOFTm	Two-sided Wilcoxon test	0.25	25
4.68903e-07	0.341222	0.399	0.374	0.0110117	Gm16599	dOFTm	Two-sided Wilcoxon test	0.25	25
7.98429e-23	0.34108	0.309	0.213	1.87503e-18	Nr2f1	dOFTm	Two-sided Wilcoxon test	0.25	25
7.74269e-30	0.340683	0.653	0.624	1.81829e-25	Hnrnph3	dOFTm	Two-sided Wilcoxon test	0.25	25
8.63656e-29	0.338977	0.739	0.682	2.02821e-24	Ccdc88a	dOFTm	Two-sided Wilcoxon test	0.25	25
8.25341e-35	0.338698	0.903	0.757	1.93823e-30	Lpp	dOFTm	Two-sided Wilcoxon test	0.25	25
3.49959e-06	0.338108	0.415	0.409	0.0821843	Wwp2	dOFTm	Two-sided Wilcoxon test	0.25	25
3.64236e-13	0.338006	0.637	0.606	8.55372e-09	Aopep	dOFTm	Two-sided Wilcoxon test	0.25	25
4.89224e-12	0.337688	0.522	0.488	1.14889e-07	Ric1	dOFTm	Two-sided Wilcoxon test	0.25	25
1.01209e-20	0.336752	0.545	0.481	2.3768e-16	Mboat2	dOFTm	Two-sided Wilcoxon test	0.25	25
9.8525e-40	0.336647	0.767	0.763	2.31376e-35	Srsf10	dOFTm	Two-sided Wilcoxon test	0.25	25
0.00238472	0.3365	0.254	0.24	1	Gm20275	dOFTm	Two-sided Wilcoxon test	0.25	25
1.65875e-28	0.335709	0.734	0.704	3.89541e-24	Pum2	dOFTm	Two-sided Wilcoxon test	0.25	25
8.24527e-18	0.335424	0.368	0.279	1.93632e-13	Daam2	dOFTm	Two-sided Wilcoxon test	0.25	25
9.58961e-24	0.335127	0.688	0.652	2.25203e-19	Wsb1	dOFTm	Two-sided Wilcoxon test	0.25	25
2.06466e-07	0.334202	0.256	0.214	0.00484864	Gm42439	dOFTm	Two-sided Wilcoxon test	0.25	25
9.62792e-25	0.334071	0.447	0.354	2.26102e-20	Amot	dOFTm	Two-sided Wilcoxon test	0.25	25
2.09284e-20	0.334063	0.309	0.221	4.91483e-16	Lrig1	dOFTm	Two-sided Wilcoxon test	0.25	25
1.07062e-20	0.333659	0.583	0.525	2.51425e-16	Rnf169	dOFTm	Two-sided Wilcoxon test	0.25	25
4.00744e-54	0.333276	0.339	0.183	9.41108e-50	Trim2	dOFTm	Two-sided Wilcoxon test	0.25	25
5.8045e-28	0.332217	0.58	0.503	1.36313e-23	Rcbtb2	dOFTm	Two-sided Wilcoxon test	0.25	25
1.2517e-34	0.331574	0.376	0.252	2.93949e-30	Pak1	dOFTm	Two-sided Wilcoxon test	0.25	25
2.45853e-22	0.331572	0.658	0.641	5.77362e-18	Ilf3	dOFTm	Two-sided Wilcoxon test	0.25	25
1.66307e-24	0.331347	0.661	0.615	3.90555e-20	Smad4	dOFTm	Two-sided Wilcoxon test	0.25	25
1.04996e-21	0.330682	0.533	0.47	2.46572e-17	Lgr4	dOFTm	Two-sided Wilcoxon test	0.25	25
1.2859e-20	0.330115	0.715	0.682	3.01981e-16	Rlf	dOFTm	Two-sided Wilcoxon test	0.25	25
1.55078e-32	0.329147	0.825	0.782	3.64186e-28	Asap1	dOFTm	Two-sided Wilcoxon test	0.25	25
8.51162e-05	0.329062	0.278	0.241	1	Clstn2	dOFTm	Two-sided Wilcoxon test	0.25	25
2.57462e-31	0.328991	0.716	0.744	6.04623e-27	Hmgb3	dOFTm	Two-sided Wilcoxon test	0.25	25
7.372e-55	0.328436	0.888	0.875	1.73124e-50	Top1	dOFTm	Two-sided Wilcoxon test	0.25	25
9.70883e-26	0.328194	0.574	0.506	2.28002e-21	Acsl3	dOFTm	Two-sided Wilcoxon test	0.25	25
3.63828e-31	0.327972	0.862	0.843	8.54413e-27	Huwe1	dOFTm	Two-sided Wilcoxon test	0.25	25
3.42966e-18	0.327463	0.569	0.519	8.05421e-14	Vgll4	dOFTm	Two-sided Wilcoxon test	0.25	25
5.14284e-36	0.326966	0.815	0.811	1.20774e-31	Tra2b	dOFTm	Two-sided Wilcoxon test	0.25	25
4.25591e-31	0.326909	0.81	0.769	9.99457e-27	Srek1	dOFTm	Two-sided Wilcoxon test	0.25	25
4.1052e-19	0.3262	0.658	0.634	9.64065e-15	Fam193a	dOFTm	Two-sided Wilcoxon test	0.25	25
9.02629e-36	0.325718	0.821	0.778	2.11973e-31	Senp6	dOFTm	Two-sided Wilcoxon test	0.25	25
3.57364e-10	0.325639	0.572	0.547	8.39233e-06	Dis3l2	dOFTm	Two-sided Wilcoxon test	0.25	25
1.02511e-18	0.324585	0.663	0.612	2.40737e-14	Zfp609	dOFTm	Two-sided Wilcoxon test	0.25	25
7.61986e-15	0.324462	0.336	0.264	1.78945e-10	Pdgfrb	dOFTm	Two-sided Wilcoxon test	0.25	25
4.7798e-18	0.324451	0.691	0.668	1.12249e-13	Med13	dOFTm	Two-sided Wilcoxon test	0.25	25
9.91954e-17	0.324038	0.539	0.483	2.32951e-12	Cplane1	dOFTm	Two-sided Wilcoxon test	0.25	25
1.49989e-27	0.324022	0.561	0.487	3.52233e-23	Phf6	dOFTm	Two-sided Wilcoxon test	0.25	25
4.39778e-21	0.323875	0.335	0.243	1.03278e-16	Il17rd	dOFTm	Two-sided Wilcoxon test	0.25	25
1.49203e-19	0.323349	0.724	0.707	3.50388e-15	Zfp280d	dOFTm	Two-sided Wilcoxon test	0.25	25
1.06508e-11	0.322911	0.387	0.311	2.50124e-07	Hdac9	dOFTm	Two-sided Wilcoxon test	0.25	25
2.7218e-21	0.322661	0.656	0.629	6.39188e-17	Fam168b	dOFTm	Two-sided Wilcoxon test	0.25	25
3.61561e-23	0.322555	0.761	0.67	8.49091e-19	Nbea	dOFTm	Two-sided Wilcoxon test	0.25	25
1.49978e-33	0.322374	0.818	0.744	3.52208e-29	Erbin	dOFTm	Two-sided Wilcoxon test	0.25	25
6.98163e-24	0.322113	0.689	0.66	1.63957e-19	Tlk2	dOFTm	Two-sided Wilcoxon test	0.25	25
1.3114e-17	0.322047	0.591	0.554	3.0797e-13	Alkbh1	dOFTm	Two-sided Wilcoxon test	0.25	25
3.64027e-32	0.321543	0.814	0.778	8.54881e-28	Pcm1	dOFTm	Two-sided Wilcoxon test	0.25	25
1.69131e-11	0.321225	0.261	0.202	3.97187e-07	Tiam2	dOFTm	Two-sided Wilcoxon test	0.25	25
1.275e-20	0.320754	0.585	0.52	2.99422e-16	Ubtd2	dOFTm	Two-sided Wilcoxon test	0.25	25
8.19622e-26	0.320674	0.743	0.731	1.9248e-21	Taf15	dOFTm	Two-sided Wilcoxon test	0.25	25
3.7399e-22	0.320597	0.546	0.476	8.78279e-18	Zfp516	dOFTm	Two-sided Wilcoxon test	0.25	25
1.7001e-19	0.320536	0.493	0.426	3.9925e-15	Ncoa5	dOFTm	Two-sided Wilcoxon test	0.25	25
1.08234e-22	0.320197	0.713	0.687	2.54176e-18	Dhx36	dOFTm	Two-sided Wilcoxon test	0.25	25
4.87077e-28	0.320078	0.737	0.699	1.14385e-23	Rsf1	dOFTm	Two-sided Wilcoxon test	0.25	25
2.16559e-18	0.320038	0.683	0.661	5.08567e-14	Myef2	dOFTm	Two-sided Wilcoxon test	0.25	25
2.63251e-19	0.319947	0.722	0.703	6.1822e-15	Uhrf2	dOFTm	Two-sided Wilcoxon test	0.25	25
6.81915e-16	0.319869	0.666	0.64	1.60141e-11	Itch	dOFTm	Two-sided Wilcoxon test	0.25	25
1.20792e-32	0.319796	0.704	0.685	2.83668e-28	Rcc2	dOFTm	Two-sided Wilcoxon test	0.25	25
1.26981e-27	0.319781	0.75	0.671	2.98203e-23	Igf2bp2	dOFTm	Two-sided Wilcoxon test	0.25	25
2.60008e-21	0.319212	0.506	0.427	6.10603e-17	Stau2	dOFTm	Two-sided Wilcoxon test	0.25	25
5.60061e-37	0.31872	0.798	0.777	1.31525e-32	Rsrc2	dOFTm	Two-sided Wilcoxon test	0.25	25
5.4325e-31	0.318595	0.682	0.534	1.27577e-26	Sox5	dOFTm	Two-sided Wilcoxon test	0.25	25
2.56191e-17	0.318269	0.51	0.444	6.01638e-13	Pde3b	dOFTm	Two-sided Wilcoxon test	0.25	25
6.98486e-18	0.317928	0.657	0.616	1.64032e-13	Sox4	dOFTm	Two-sided Wilcoxon test	0.25	25
1.25093e-17	0.31782	0.565	0.486	2.93768e-13	Fat1	dOFTm	Two-sided Wilcoxon test	0.25	25
6.01227e-22	0.317355	0.76	0.736	1.41192e-17	Wdr33	dOFTm	Two-sided Wilcoxon test	0.25	25
3.51033e-35	0.31716	0.796	0.785	8.24365e-31	Sumo1	dOFTm	Two-sided Wilcoxon test	0.25	25
2.88896e-22	0.316343	0.629	0.609	6.78442e-18	Sinhcaf	dOFTm	Two-sided Wilcoxon test	0.25	25
1.02638e-26	0.315772	0.655	0.593	2.41035e-22	Rcn2	dOFTm	Two-sided Wilcoxon test	0.25	25
3.42524e-24	0.315745	0.345	0.241	8.04383e-20	Tox3	dOFTm	Two-sided Wilcoxon test	0.25	25
2.52293e-25	0.315614	0.792	0.765	5.92484e-21	Ythdc1	dOFTm	Two-sided Wilcoxon test	0.25	25
4.0473e-29	0.315462	0.889	0.81	9.50467e-25	Msi2	dOFTm	Two-sided Wilcoxon test	0.25	25
2.9518e-20	0.31532	0.358	0.264	6.93202e-16	Osbpl6	dOFTm	Two-sided Wilcoxon test	0.25	25
5.31399e-14	0.315245	0.483	0.423	1.24794e-09	Lats2	dOFTm	Two-sided Wilcoxon test	0.25	25
6.25434e-26	0.315147	0.737	0.615	1.46877e-21	Neo1	dOFTm	Two-sided Wilcoxon test	0.25	25
7.58018e-18	0.315112	0.686	0.669	1.78013e-13	Kcmf1	dOFTm	Two-sided Wilcoxon test	0.25	25
6.45798e-20	0.314743	0.602	0.589	1.51659e-15	Ccdc34	dOFTm	Two-sided Wilcoxon test	0.25	25
4.18523e-20	0.314712	0.708	0.67	9.82861e-16	Ogt	dOFTm	Two-sided Wilcoxon test	0.25	25
8.22294e-26	0.314688	0.78	0.651	1.93108e-21	Dock1	dOFTm	Two-sided Wilcoxon test	0.25	25
1.21251e-36	0.314287	0.354	0.222	2.84745e-32	Prom1	dOFTm	Two-sided Wilcoxon test	0.25	25
1.10132e-22	0.314106	0.773	0.724	2.58634e-18	Smg6	dOFTm	Two-sided Wilcoxon test	0.25	25
1.3438e-33	0.314009	0.817	0.816	3.15578e-29	Thrap3	dOFTm	Two-sided Wilcoxon test	0.25	25
3.63181e-08	0.313748	0.488	0.46	0.000852895	Usp29	dOFTm	Two-sided Wilcoxon test	0.25	25
2.19348e-20	0.313693	0.454	0.35	5.15117e-16	Gucy1a2	dOFTm	Two-sided Wilcoxon test	0.25	25
2.92122e-69	0.31345	0.272	0.114	6.8602e-65	Wasf3	dOFTm	Two-sided Wilcoxon test	0.25	25
2.22206e-14	0.31277	0.708	0.688	5.21828e-10	Kdm5a	dOFTm	Two-sided Wilcoxon test	0.25	25
3.2188e-30	0.312725	0.768	0.759	7.55903e-26	Adnp	dOFTm	Two-sided Wilcoxon test	0.25	25
1.28651e-38	0.312597	0.81	0.806	3.02124e-34	Snrnp70	dOFTm	Two-sided Wilcoxon test	0.25	25
7.40828e-22	0.312225	0.735	0.725	1.73976e-17	Rbm6	dOFTm	Two-sided Wilcoxon test	0.25	25
1.8841e-18	0.312174	0.661	0.618	4.42462e-14	Tulp4	dOFTm	Two-sided Wilcoxon test	0.25	25
4.58123e-16	0.311954	0.628	0.607	1.07586e-11	Pias2	dOFTm	Two-sided Wilcoxon test	0.25	25
9.37872e-19	0.311889	0.674	0.677	2.2025e-14	Hnrnpl	dOFTm	Two-sided Wilcoxon test	0.25	25
1.33976e-23	0.311719	0.624	0.496	3.14629e-19	Slit2	dOFTm	Two-sided Wilcoxon test	0.25	25
2.01272e-21	0.31164	0.748	0.728	4.72668e-17	Akap9	dOFTm	Two-sided Wilcoxon test	0.25	25
2.82113e-30	0.311286	0.767	0.763	6.62515e-26	Ewsr1	dOFTm	Two-sided Wilcoxon test	0.25	25
4.95791e-36	0.311132	0.523	0.385	1.16432e-31	Igfbp2	dOFTm	Two-sided Wilcoxon test	0.25	25
3.78173e-08	0.311123	0.406	0.373	0.000888101	1600010M07Rik	dOFTm	Two-sided Wilcoxon test	0.25	25
3.16765e-25	0.310723	0.721	0.684	7.43891e-21	Setd2	dOFTm	Two-sided Wilcoxon test	0.25	25
1.39457e-10	0.310551	0.449	0.395	3.27502e-06	Bcl2	dOFTm	Two-sided Wilcoxon test	0.25	25
1.50485e-13	0.309804	0.468	0.402	3.53398e-09	Uty	dOFTm	Two-sided Wilcoxon test	0.25	25
2.86465e-30	0.309542	0.416	0.303	6.72735e-26	Mex3b	dOFTm	Two-sided Wilcoxon test	0.25	25
1.50688e-27	0.309022	0.423	0.315	3.53876e-23	Rnf144a	dOFTm	Two-sided Wilcoxon test	0.25	25
2.66097e-18	0.308584	0.699	0.678	6.24903e-14	Ubn2	dOFTm	Two-sided Wilcoxon test	0.25	25
4.92732e-26	0.308223	0.383	0.281	1.15713e-21	Dzip1	dOFTm	Two-sided Wilcoxon test	0.25	25
8.53001e-22	0.308199	0.732	0.715	2.00319e-17	Zfp638	dOFTm	Two-sided Wilcoxon test	0.25	25
7.62909e-13	0.307707	0.434	0.385	1.79161e-08	Smad3	dOFTm	Two-sided Wilcoxon test	0.25	25
2.9364e-20	0.307375	0.635	0.589	6.89585e-16	E130308A19Rik	dOFTm	Two-sided Wilcoxon test	0.25	25
3.28499e-13	0.307255	0.556	0.514	7.71446e-09	Hip1	dOFTm	Two-sided Wilcoxon test	0.25	25
3.00592e-06	0.306728	0.616	0.585	0.0705909	Tanc1	dOFTm	Two-sided Wilcoxon test	0.25	25
1.19102e-12	0.306479	0.637	0.614	2.79699e-08	Rfx7	dOFTm	Two-sided Wilcoxon test	0.25	25
4.55755e-20	0.306147	0.804	0.77	1.0703e-15	Mllt10	dOFTm	Two-sided Wilcoxon test	0.25	25
1.39851e-25	0.305822	0.706	0.698	3.28426e-21	Ccar1	dOFTm	Two-sided Wilcoxon test	0.25	25
1.6482e-61	0.304308	0.314	0.156	3.87063e-57	Rdh10	dOFTm	Two-sided Wilcoxon test	0.25	25
1.32862e-10	0.303824	0.677	0.669	3.12012e-06	Kdm6a	dOFTm	Two-sided Wilcoxon test	0.25	25
5.12553e-17	0.303174	0.441	0.366	1.20368e-12	Dlg5	dOFTm	Two-sided Wilcoxon test	0.25	25
2.57598e-33	0.303083	0.829	0.714	6.04943e-29	Kcnq1ot1	dOFTm	Two-sided Wilcoxon test	0.25	25
1.67606e-15	0.303081	0.668	0.644	3.93606e-11	Cox16	dOFTm	Two-sided Wilcoxon test	0.25	25
1.80891e-27	0.302814	0.916	0.718	4.24805e-23	Nfia	dOFTm	Two-sided Wilcoxon test	0.25	25
7.99758e-15	0.302223	0.391	0.321	1.87815e-10	Wnt5a	dOFTm	Two-sided Wilcoxon test	0.25	25
1.50229e-23	0.301143	0.752	0.697	3.52797e-19	Wdfy3	dOFTm	Two-sided Wilcoxon test	0.25	25
5.95962e-11	0.301063	0.619	0.616	1.39956e-06	Rc3h1	dOFTm	Two-sided Wilcoxon test	0.25	25
3.72446e-09	0.300747	0.546	0.521	8.74652e-05	Chd9	dOFTm	Two-sided Wilcoxon test	0.25	25
0.000407345	0.300453	0.566	0.571	1	Prickle1	dOFTm	Two-sided Wilcoxon test	0.25	25
3.09358e-16	0.299616	0.468	0.416	7.26496e-12	Rab28	dOFTm	Two-sided Wilcoxon test	0.25	25
1.11489e-14	0.299191	0.506	0.456	2.6182e-10	Elovl6	dOFTm	Two-sided Wilcoxon test	0.25	25
6.34693e-07	0.299184	0.351	0.311	0.0149051	Naaladl2	dOFTm	Two-sided Wilcoxon test	0.25	25
7.8227e-32	0.298661	0.838	0.816	1.83708e-27	Gnb1	dOFTm	Two-sided Wilcoxon test	0.25	25
1.95574e-20	0.298535	0.274	0.184	4.59286e-16	Adam22	dOFTm	Two-sided Wilcoxon test	0.25	25
9.34569e-15	0.298101	0.678	0.653	2.19474e-10	Cdk12	dOFTm	Two-sided Wilcoxon test	0.25	25
6.01643e-12	0.2981	0.64	0.601	1.4129e-07	Smyd3	dOFTm	Two-sided Wilcoxon test	0.25	25
2.98568e-34	0.297884	0.844	0.832	7.01156e-30	Caprin1	dOFTm	Two-sided Wilcoxon test	0.25	25
3.54223e-19	0.297228	0.638	0.612	8.31857e-15	Rbpj	dOFTm	Two-sided Wilcoxon test	0.25	25
3.04737e-18	0.296895	0.486	0.423	7.15645e-14	Hsf2	dOFTm	Two-sided Wilcoxon test	0.25	25
9.78995e-18	0.296891	0.686	0.622	2.29907e-13	Nxn	dOFTm	Two-sided Wilcoxon test	0.25	25
7.40036e-17	0.296617	0.443	0.385	1.7379e-12	Zfp362	dOFTm	Two-sided Wilcoxon test	0.25	25
1.29906e-34	0.295931	0.852	0.835	3.0507e-30	Rbm25	dOFTm	Two-sided Wilcoxon test	0.25	25
4.36715e-05	0.295485	0.367	0.349	1	Phykpl	dOFTm	Two-sided Wilcoxon test	0.25	25
6.00754e-13	0.295238	0.595	0.578	1.41081e-08	1810026B05Rik	dOFTm	Two-sided Wilcoxon test	0.25	25
2.04431e-09	0.295094	0.433	0.397	4.80085e-05	Arhgef11	dOFTm	Two-sided Wilcoxon test	0.25	25
2.57428e-31	0.294828	0.332	0.207	6.04545e-27	Dclk1	dOFTm	Two-sided Wilcoxon test	0.25	25
2.59624e-09	0.294728	0.394	0.352	6.097e-05	Mdfic	dOFTm	Two-sided Wilcoxon test	0.25	25
1.31105e-15	0.29467	0.548	0.466	3.07887e-11	Plod2	dOFTm	Two-sided Wilcoxon test	0.25	25
1.29212e-09	0.294665	0.499	0.479	3.03442e-05	Kdm7a	dOFTm	Two-sided Wilcoxon test	0.25	25
1.22975e-17	0.294237	0.701	0.701	2.88795e-13	Sltm	dOFTm	Two-sided Wilcoxon test	0.25	25
6.82555e-28	0.294045	0.741	0.683	1.60291e-23	Cnn3	dOFTm	Two-sided Wilcoxon test	0.25	25
2.85215e-12	0.294037	0.569	0.541	6.69799e-08	Ptpn9	dOFTm	Two-sided Wilcoxon test	0.25	25
7.87407e-18	0.29402	0.682	0.696	1.84915e-13	Bzw2	dOFTm	Two-sided Wilcoxon test	0.25	25
2.19195e-16	0.29274	0.728	0.706	5.14757e-12	Clk1	dOFTm	Two-sided Wilcoxon test	0.25	25
1.28033e-16	0.291882	0.755	0.696	3.00673e-12	Vcl	dOFTm	Two-sided Wilcoxon test	0.25	25
6.20685e-23	0.291602	0.71	0.714	1.45762e-18	Dnajc7	dOFTm	Two-sided Wilcoxon test	0.25	25
7.84866e-18	0.291558	0.532	0.487	1.84318e-13	Rbmx	dOFTm	Two-sided Wilcoxon test	0.25	25
1.28499e-12	0.291535	0.567	0.495	3.01768e-08	Sh3rf1	dOFTm	Two-sided Wilcoxon test	0.25	25
1.04203e-19	0.291245	0.529	0.486	2.44711e-15	Vezf1	dOFTm	Two-sided Wilcoxon test	0.25	25
1.47331e-19	0.290972	0.549	0.462	3.45992e-15	Zdbf2	dOFTm	Two-sided Wilcoxon test	0.25	25
1.23441e-37	0.290892	0.889	0.855	2.89889e-33	Prrc2c	dOFTm	Two-sided Wilcoxon test	0.25	25
2.72473e-12	0.2908	0.487	0.451	6.39875e-08	Trp53bp2	dOFTm	Two-sided Wilcoxon test	0.25	25
9.08393e-14	0.290604	0.561	0.536	2.13327e-09	Slc25a36	dOFTm	Two-sided Wilcoxon test	0.25	25
7.94189e-17	0.289789	0.517	0.458	1.86507e-12	Rcbtb1	dOFTm	Two-sided Wilcoxon test	0.25	25
9.64537e-11	0.289629	0.566	0.557	2.26512e-06	Pou2f1	dOFTm	Two-sided Wilcoxon test	0.25	25
8.47402e-16	0.28951	0.556	0.499	1.99004e-11	Tubb2b	dOFTm	Two-sided Wilcoxon test	0.25	25
2.64218e-06	0.289038	0.252	0.216	0.062049	Gm19710	dOFTm	Two-sided Wilcoxon test	0.25	25
0.000278268	0.288444	0.292	0.274	1	Tmem243	dOFTm	Two-sided Wilcoxon test	0.25	25
1.91067e-05	0.288189	0.548	0.547	0.448701	Bcas3	dOFTm	Two-sided Wilcoxon test	0.25	25
1.01298e-18	0.287994	0.561	0.511	2.37887e-14	Smarcd1	dOFTm	Two-sided Wilcoxon test	0.25	25
1.79775e-05	0.287595	0.364	0.349	0.422185	2610020C07Rik	dOFTm	Two-sided Wilcoxon test	0.25	25
8.02802e-11	0.287546	0.368	0.314	1.8853e-06	Cecr2	dOFTm	Two-sided Wilcoxon test	0.25	25
6.10197e-10	0.287518	0.393	0.329	1.43299e-05	Ust	dOFTm	Two-sided Wilcoxon test	0.25	25
4.44974e-09	0.287493	0.576	0.565	0.000104498	E2f3	dOFTm	Two-sided Wilcoxon test	0.25	25
8.62985e-15	0.287363	0.75	0.692	2.02663e-10	Fbxl17	dOFTm	Two-sided Wilcoxon test	0.25	25
7.63733e-15	0.287125	0.503	0.468	1.79355e-10	Mex3c	dOFTm	Two-sided Wilcoxon test	0.25	25
9.95319e-11	0.28634	0.315	0.253	2.33741e-06	A230057D06Rik	dOFTm	Two-sided Wilcoxon test	0.25	25
2.53303e-21	0.286129	0.705	0.68	5.94856e-17	Marcksl1	dOFTm	Two-sided Wilcoxon test	0.25	25
3.50151e-16	0.285754	0.618	0.585	8.22295e-12	H13	dOFTm	Two-sided Wilcoxon test	0.25	25
1.2544e-10	0.285412	0.612	0.589	2.94584e-06	Osbpl9	dOFTm	Two-sided Wilcoxon test	0.25	25
1.30272e-26	0.284717	0.854	0.795	3.0593e-22	Ankrd17	dOFTm	Two-sided Wilcoxon test	0.25	25
5.07105e-28	0.284305	0.286	0.179	1.19089e-23	Ankrd6	dOFTm	Two-sided Wilcoxon test	0.25	25
1.14293e-10	0.284251	0.615	0.616	2.68407e-06	Nfyc	dOFTm	Two-sided Wilcoxon test	0.25	25
2.91714e-18	0.284102	0.558	0.499	6.85062e-14	Trp53bp1	dOFTm	Two-sided Wilcoxon test	0.25	25
2.72814e-18	0.28398	0.336	0.258	6.40677e-14	Megf9	dOFTm	Two-sided Wilcoxon test	0.25	25
4.34609e-24	0.283539	0.825	0.788	1.02064e-19	Nipbl	dOFTm	Two-sided Wilcoxon test	0.25	25
2.07012e-11	0.283169	0.587	0.577	4.86147e-07	Zranb1	dOFTm	Two-sided Wilcoxon test	0.25	25
7.85225e-16	0.282885	0.437	0.368	1.84402e-11	Jam3	dOFTm	Two-sided Wilcoxon test	0.25	25
1.14018e-19	0.282875	0.629	0.529	2.67761e-15	Gulp1	dOFTm	Two-sided Wilcoxon test	0.25	25
7.97164e-17	0.282675	0.279	0.191	1.87206e-12	Adamts19	dOFTm	Two-sided Wilcoxon test	0.25	25
4.33384e-14	0.282183	0.66	0.65	1.01776e-09	Klhl7	dOFTm	Two-sided Wilcoxon test	0.25	25
1.98533e-16	0.282108	0.626	0.609	4.66234e-12	Paip1	dOFTm	Two-sided Wilcoxon test	0.25	25
2.93001e-08	0.28207	0.461	0.438	0.000688083	Usp6nl	dOFTm	Two-sided Wilcoxon test	0.25	25
4.05865e-22	0.282005	0.742	0.706	9.53133e-18	Tsc22d1	dOFTm	Two-sided Wilcoxon test	0.25	25
2.58973e-42	0.281982	0.293	0.158	6.08172e-38	Bcl11b	dOFTm	Two-sided Wilcoxon test	0.25	25
1.72957e-25	0.281827	0.845	0.813	4.06172e-21	Usp34	dOFTm	Two-sided Wilcoxon test	0.25	25
2.95996e-18	0.281758	0.687	0.602	6.95116e-14	Mpdz	dOFTm	Two-sided Wilcoxon test	0.25	25
6.38612e-09	0.281744	0.414	0.39	0.000149972	Tmem29	dOFTm	Two-sided Wilcoxon test	0.25	25
5.72377e-18	0.281492	0.735	0.705	1.34417e-13	Usp47	dOFTm	Two-sided Wilcoxon test	0.25	25
2.89618e-28	0.281234	0.6	0.49	6.8014e-24	Mfap2	dOFTm	Two-sided Wilcoxon test	0.25	25
8.78508e-16	0.281176	0.651	0.599	2.06309e-11	Fchsd2	dOFTm	Two-sided Wilcoxon test	0.25	25
3.91625e-12	0.281106	0.624	0.617	9.19692e-08	Ppp2r5e	dOFTm	Two-sided Wilcoxon test	0.25	25
3.94835e-24	0.280576	0.362	0.256	9.27232e-20	Rimklb	dOFTm	Two-sided Wilcoxon test	0.25	25
2.06648e-13	0.280548	0.615	0.587	4.85292e-09	Tasor2	dOFTm	Two-sided Wilcoxon test	0.25	25
2.0719e-11	0.280534	0.555	0.52	4.86565e-07	Rai1	dOFTm	Two-sided Wilcoxon test	0.25	25
4.30506e-21	0.280338	0.367	0.28	1.011e-16	Dchs1	dOFTm	Two-sided Wilcoxon test	0.25	25
3.69389e-13	0.279867	0.635	0.632	8.67473e-09	Map2k4	dOFTm	Two-sided Wilcoxon test	0.25	25
1.18286e-12	0.279643	0.595	0.575	2.77782e-08	Ubxn7	dOFTm	Two-sided Wilcoxon test	0.25	25
7.43617e-26	0.279585	0.801	0.657	1.74631e-21	Ptprg	dOFTm	Two-sided Wilcoxon test	0.25	25
6.12538e-14	0.279561	0.36	0.286	1.43848e-09	Tbc1d9	dOFTm	Two-sided Wilcoxon test	0.25	25
1.07388e-27	0.279376	0.851	0.805	2.5219e-23	Gsk3b	dOFTm	Two-sided Wilcoxon test	0.25	25
4.17854e-08	0.279358	0.254	0.21	0.000981288	Gm26542	dOFTm	Two-sided Wilcoxon test	0.25	25
2.69032e-17	0.279164	0.613	0.592	6.31795e-13	Brd3	dOFTm	Two-sided Wilcoxon test	0.25	25
3.14036e-10	0.279053	0.559	0.547	7.37481e-06	Eps15l1	dOFTm	Two-sided Wilcoxon test	0.25	25
5.38233e-19	0.278349	0.717	0.705	1.26399e-14	Smarca4	dOFTm	Two-sided Wilcoxon test	0.25	25
4.79291e-27	0.278273	0.771	0.782	1.12557e-22	Hnrnpdl	dOFTm	Two-sided Wilcoxon test	0.25	25
3.35154e-22	0.278134	0.349	0.259	7.87076e-18	Dlg3	dOFTm	Two-sided Wilcoxon test	0.25	25
6.53371e-19	0.277902	0.677	0.642	1.53438e-14	Slc38a1	dOFTm	Two-sided Wilcoxon test	0.25	25
7.29233e-12	0.27783	0.598	0.576	1.71253e-07	Ralgps2	dOFTm	Two-sided Wilcoxon test	0.25	25
5.28631e-20	0.277446	0.744	0.733	1.24144e-15	Brd4	dOFTm	Two-sided Wilcoxon test	0.25	25
3.37509e-06	0.277418	0.556	0.502	0.0792606	Kif26b	dOFTm	Two-sided Wilcoxon test	0.25	25
1.81114e-12	0.277172	0.642	0.627	4.25329e-08	Rptor	dOFTm	Two-sided Wilcoxon test	0.25	25
4.61506e-09	0.27711	0.587	0.563	0.00010838	Pcnx	dOFTm	Two-sided Wilcoxon test	0.25	25
8.54164e-52	0.276792	0.273	0.133	2.00592e-47	D430019H16Rik	dOFTm	Two-sided Wilcoxon test	0.25	25
6.50444e-06	0.276227	0.616	0.627	0.15275	Atp9b	dOFTm	Two-sided Wilcoxon test	0.25	25
3.08155e-25	0.276222	0.893	0.911	7.23671e-21	Gnas	dOFTm	Two-sided Wilcoxon test	0.25	25
4.29328e-24	0.276045	0.803	0.735	1.00823e-19	Eml4	dOFTm	Two-sided Wilcoxon test	0.25	25
1.22539e-17	0.275473	0.63	0.527	2.87771e-13	Epha7	dOFTm	Two-sided Wilcoxon test	0.25	25
5.70187e-29	0.275112	0.994	0.997	1.33903e-24	Ptma	dOFTm	Two-sided Wilcoxon test	0.25	25
1.4734e-23	0.274703	0.949	0.754	3.46013e-19	Nfib	dOFTm	Two-sided Wilcoxon test	0.25	25
5.40549e-13	0.274464	0.706	0.646	1.26943e-08	Sbf2	dOFTm	Two-sided Wilcoxon test	0.25	25
4.38688e-06	0.274429	0.633	0.648	0.103021	Xrn1	dOFTm	Two-sided Wilcoxon test	0.25	25
2.40645e-09	0.274366	0.431	0.394	5.65131e-05	Ttc23	dOFTm	Two-sided Wilcoxon test	0.25	25
4.43632e-33	0.2742	0.869	0.862	1.04182e-28	Sf3b1	dOFTm	Two-sided Wilcoxon test	0.25	25
3.00684e-12	0.274179	0.522	0.494	7.06126e-08	Gabpb1	dOFTm	Two-sided Wilcoxon test	0.25	25
5.50547e-12	0.274123	0.654	0.647	1.29291e-07	Qrich1	dOFTm	Two-sided Wilcoxon test	0.25	25
4.44573e-13	0.274083	0.664	0.626	1.04404e-08	Scmh1	dOFTm	Two-sided Wilcoxon test	0.25	25
1.00615e-24	0.274063	0.744	0.72	2.36284e-20	Scd2	dOFTm	Two-sided Wilcoxon test	0.25	25
7.76138e-13	0.273881	0.579	0.566	1.82268e-08	Maco1	dOFTm	Two-sided Wilcoxon test	0.25	25
2.29138e-19	0.273792	0.655	0.662	5.38107e-15	Hdac2	dOFTm	Two-sided Wilcoxon test	0.25	25
2.25032e-10	0.273731	0.472	0.423	5.28466e-06	Fam171a1	dOFTm	Two-sided Wilcoxon test	0.25	25
1.85415e-12	0.273655	0.567	0.542	4.35429e-08	Raf1	dOFTm	Two-sided Wilcoxon test	0.25	25
8.20932e-16	0.273315	0.705	0.682	1.92788e-11	Rif1	dOFTm	Two-sided Wilcoxon test	0.25	25
6.18937e-28	0.272897	0.826	0.814	1.45351e-23	Srsf11	dOFTm	Two-sided Wilcoxon test	0.25	25
3.48845e-15	0.272471	0.699	0.674	8.19228e-11	Sec63	dOFTm	Two-sided Wilcoxon test	0.25	25
2.43571e-17	0.272239	0.741	0.73	5.72003e-13	Pds5a	dOFTm	Two-sided Wilcoxon test	0.25	25
3.62563e-23	0.271675	0.774	0.768	8.51443e-19	Ddx6	dOFTm	Two-sided Wilcoxon test	0.25	25
2.61578e-18	0.271179	0.716	0.695	6.14289e-14	Bptf	dOFTm	Two-sided Wilcoxon test	0.25	25
7.13149e-27	0.270927	0.818	0.817	1.67476e-22	Cdk8	dOFTm	Two-sided Wilcoxon test	0.25	25
4.53553e-20	0.270672	0.552	0.509	1.06512e-15	Dcakd	dOFTm	Two-sided Wilcoxon test	0.25	25
2.48601e-13	0.270422	0.639	0.621	5.83814e-09	Hsd17b12	dOFTm	Two-sided Wilcoxon test	0.25	25
1.63086e-07	0.270319	0.552	0.558	0.00382991	Fam133b	dOFTm	Two-sided Wilcoxon test	0.25	25
5.89459e-33	0.270145	0.887	0.671	1.38429e-28	Rbms3	dOFTm	Two-sided Wilcoxon test	0.25	25
2.55348e-19	0.269962	0.356	0.258	5.9966e-15	Pknox2	dOFTm	Two-sided Wilcoxon test	0.25	25
9.36732e-16	0.26993	0.661	0.639	2.19982e-11	Atf2	dOFTm	Two-sided Wilcoxon test	0.25	25
3.67147e-12	0.269545	0.594	0.584	8.62207e-08	Rnf2	dOFTm	Two-sided Wilcoxon test	0.25	25
4.82998e-22	0.269513	0.729	0.753	1.13427e-17	Smarce1	dOFTm	Two-sided Wilcoxon test	0.25	25
1.71869e-30	0.269465	0.779	0.77	4.03618e-26	Top2b	dOFTm	Two-sided Wilcoxon test	0.25	25
4.727e-05	0.269277	0.301	0.258	1	Angpt1	dOFTm	Two-sided Wilcoxon test	0.25	25
1.56974e-17	0.269111	0.259	0.176	3.68638e-13	Srgap3	dOFTm	Two-sided Wilcoxon test	0.25	25
3.27429e-16	0.268945	0.365	0.274	7.68934e-12	Itgb8	dOFTm	Two-sided Wilcoxon test	0.25	25
1.33573e-16	0.268801	0.364	0.287	3.13683e-12	Lrrc8d	dOFTm	Two-sided Wilcoxon test	0.25	25
8.32757e-13	0.268592	0.723	0.715	1.95565e-08	Rsrc1	dOFTm	Two-sided Wilcoxon test	0.25	25
1.77033e-09	0.268303	0.562	0.547	4.15745e-05	Ss18	dOFTm	Two-sided Wilcoxon test	0.25	25
1.04255e-20	0.268174	0.653	0.633	2.44832e-16	Ddah2	dOFTm	Two-sided Wilcoxon test	0.25	25
7.90924e-19	0.268042	0.69	0.666	1.85741e-14	Igf2bp1	dOFTm	Two-sided Wilcoxon test	0.25	25
4.36252e-42	0.267998	0.32	0.177	1.0245e-37	Sfrp2	dOFTm	Two-sided Wilcoxon test	0.25	25
4.50748e-13	0.267876	0.629	0.622	1.05854e-08	Dicer1	dOFTm	Two-sided Wilcoxon test	0.25	25
7.46524e-10	0.267859	0.526	0.508	1.75314e-05	Khdc4	dOFTm	Two-sided Wilcoxon test	0.25	25
1.67663e-05	0.267814	0.411	0.399	0.39374	Cdc14a	dOFTm	Two-sided Wilcoxon test	0.25	25
2.38998e-07	0.267755	0.592	0.589	0.00561262	AW554918	dOFTm	Two-sided Wilcoxon test	0.25	25
1.93466e-23	0.267682	0.4	0.307	4.54337e-19	Acvr2b	dOFTm	Two-sided Wilcoxon test	0.25	25
1.6811e-07	0.267438	0.468	0.441	0.0039479	Dtnb	dOFTm	Two-sided Wilcoxon test	0.25	25
2.40584e-15	0.266555	0.733	0.706	5.64987e-11	Dyrk1a	dOFTm	Two-sided Wilcoxon test	0.25	25
9.70846e-14	0.266515	0.648	0.634	2.27993e-09	Pspc1	dOFTm	Two-sided Wilcoxon test	0.25	25
1.11208e-19	0.266278	0.567	0.54	2.61161e-15	Zfp422	dOFTm	Two-sided Wilcoxon test	0.25	25
1.94815e-15	0.266182	0.544	0.521	4.57504e-11	Gstm5	dOFTm	Two-sided Wilcoxon test	0.25	25
2.5258e-08	0.266128	0.81	0.701	0.000593159	Prkg1	dOFTm	Two-sided Wilcoxon test	0.25	25
7.17219e-73	0.266107	0.27	0.109	1.68432e-68	Pdlim4	dOFTm	Two-sided Wilcoxon test	0.25	25
2.89934e-22	0.265934	0.774	0.792	6.80881e-18	Supt16	dOFTm	Two-sided Wilcoxon test	0.25	25
1.7081e-10	0.265871	0.536	0.522	4.01129e-06	Kmt5b	dOFTm	Two-sided Wilcoxon test	0.25	25
2.50565e-17	0.265361	0.678	0.654	5.88426e-13	N4bp2	dOFTm	Two-sided Wilcoxon test	0.25	25
2.07289e-20	0.26528	0.59	0.461	4.86797e-16	Npas3	dOFTm	Two-sided Wilcoxon test	0.25	25
8.96553e-46	0.265195	0.357	0.21	2.10547e-41	Nsg1	dOFTm	Two-sided Wilcoxon test	0.25	25
1.30051e-08	0.265158	0.481	0.458	0.000305411	Emsy	dOFTm	Two-sided Wilcoxon test	0.25	25
1.61021e-08	0.265091	0.513	0.502	0.000378142	Kdm3b	dOFTm	Two-sided Wilcoxon test	0.25	25
5.5543e-17	0.264705	0.417	0.323	1.30437e-12	Peli2	dOFTm	Two-sided Wilcoxon test	0.25	25
9.98852e-13	0.264677	0.644	0.628	2.3457e-08	Kmt2a	dOFTm	Two-sided Wilcoxon test	0.25	25
6.05968e-25	0.264582	0.731	0.707	1.42306e-20	H2afy	dOFTm	Two-sided Wilcoxon test	0.25	25
1.17319e-15	0.264328	0.411	0.343	2.75512e-11	Plcg1	dOFTm	Two-sided Wilcoxon test	0.25	25
1.95865e-14	0.264165	0.372	0.306	4.59969e-10	Bahcc1	dOFTm	Two-sided Wilcoxon test	0.25	25
0.00081227	0.264142	0.522	0.543	1	Dnajc19	dOFTm	Two-sided Wilcoxon test	0.25	25
1.09951e-34	0.264078	0.796	0.797	2.58209e-30	Nono	dOFTm	Two-sided Wilcoxon test	0.25	25
1.20957e-15	0.263982	0.51	0.444	2.84056e-11	Sestd1	dOFTm	Two-sided Wilcoxon test	0.25	25
8.67607e-14	0.263309	0.717	0.71	2.03749e-09	Kmt2e	dOFTm	Two-sided Wilcoxon test	0.25	25
6.54798e-05	0.263236	0.469	0.471	1	Hdac8	dOFTm	Two-sided Wilcoxon test	0.25	25
8.13706e-09	0.263131	0.588	0.576	0.000191091	Acaca	dOFTm	Two-sided Wilcoxon test	0.25	25
1.11539e-08	0.262364	0.541	0.526	0.000261938	Spred2	dOFTm	Two-sided Wilcoxon test	0.25	25
1.54277e-15	0.262328	0.677	0.677	3.62304e-11	Sppl3	dOFTm	Two-sided Wilcoxon test	0.25	25
4.88293e-22	0.262161	0.464	0.36	1.14671e-17	Prrx2	dOFTm	Two-sided Wilcoxon test	0.25	25
5.37656e-22	0.261801	0.738	0.72	1.26263e-17	Gpbp1	dOFTm	Two-sided Wilcoxon test	0.25	25
1.74102e-11	0.261631	0.572	0.564	4.08861e-07	Appl1	dOFTm	Two-sided Wilcoxon test	0.25	25
2.48096e-34	0.261554	0.316	0.187	5.82629e-30	Hoxb3	dOFTm	Two-sided Wilcoxon test	0.25	25
3.5402e-15	0.261371	0.76	0.749	8.3138e-11	Cnot1	dOFTm	Two-sided Wilcoxon test	0.25	25
7.06688e-24	0.261267	0.416	0.316	1.65959e-19	Pard6g	dOFTm	Two-sided Wilcoxon test	0.25	25
3.42213e-16	0.261257	0.702	0.684	8.03653e-12	Gtf2i	dOFTm	Two-sided Wilcoxon test	0.25	25
0.000113881	0.261118	0.439	0.437	1	Sfmbt1	dOFTm	Two-sided Wilcoxon test	0.25	25
2.60285e-32	0.26091	0.736	0.71	6.11253e-28	Csrp2	dOFTm	Two-sided Wilcoxon test	0.25	25
6.28303e-06	0.260512	0.446	0.429	0.147551	Cdc14b	dOFTm	Two-sided Wilcoxon test	0.25	25
4.58326e-15	0.260359	0.469	0.43	1.07633e-10	Nmral1	dOFTm	Two-sided Wilcoxon test	0.25	25
8.95398e-21	0.260358	0.587	0.5	2.10275e-16	Fbln1	dOFTm	Two-sided Wilcoxon test	0.25	25
4.6571e-10	0.260015	0.68	0.681	1.09367e-05	Ppp6r3	dOFTm	Two-sided Wilcoxon test	0.25	25
7.63345e-16	0.259622	0.565	0.506	1.79264e-11	Nrep	dOFTm	Two-sided Wilcoxon test	0.25	25
0.00312804	0.259467	0.541	0.551	1	Phactr2	dOFTm	Two-sided Wilcoxon test	0.25	25
3.70329e-45	0.259179	0.414	0.243	8.69681e-41	Crabp1	dOFTm	Two-sided Wilcoxon test	0.25	25
2.86783e-10	0.259175	0.655	0.635	6.73482e-06	Rabgap1	dOFTm	Two-sided Wilcoxon test	0.25	25
4.3867e-14	0.25913	0.431	0.37	1.03017e-09	Arhgef17	dOFTm	Two-sided Wilcoxon test	0.25	25
1.79191e-12	0.258761	0.679	0.686	4.20812e-08	Dhx15	dOFTm	Two-sided Wilcoxon test	0.25	25
2.96537e-06	0.258269	0.251	0.214	0.0696387	Gm17106	dOFTm	Two-sided Wilcoxon test	0.25	25
6.57025e-11	0.258257	0.655	0.669	1.54296e-06	Ppp4r3a	dOFTm	Two-sided Wilcoxon test	0.25	25
2.65713e-21	0.258256	0.79	0.783	6.24001e-17	Ube2k	dOFTm	Two-sided Wilcoxon test	0.25	25
2.72487e-13	0.258256	0.615	0.599	6.39908e-09	Ylpm1	dOFTm	Two-sided Wilcoxon test	0.25	25
2.21081e-08	0.257998	0.518	0.512	0.000519187	Bcor	dOFTm	Two-sided Wilcoxon test	0.25	25
2.14996e-33	0.257925	0.921	0.949	5.04897e-29	Hmgb1	dOFTm	Two-sided Wilcoxon test	0.25	25
1.67655e-16	0.256914	0.594	0.58	3.9372e-12	Tcf3	dOFTm	Two-sided Wilcoxon test	0.25	25
3.65209e-05	0.256906	0.584	0.545	0.857657	Creb5	dOFTm	Two-sided Wilcoxon test	0.25	25
0.00042507	0.256733	0.48	0.489	1	Sos2	dOFTm	Two-sided Wilcoxon test	0.25	25
2.37912e-16	0.2566	0.684	0.724	5.58712e-12	Atxn7l3b	dOFTm	Two-sided Wilcoxon test	0.25	25
1.13356e-14	0.256359	0.512	0.43	2.66206e-10	Adamts6	dOFTm	Two-sided Wilcoxon test	0.25	25
1.46109e-09	0.25575	0.556	0.548	3.43122e-05	Mcmbp	dOFTm	Two-sided Wilcoxon test	0.25	25
1.78484e-11	0.255649	0.699	0.69	4.19153e-07	Fcho2	dOFTm	Two-sided Wilcoxon test	0.25	25
5.55718e-23	0.255361	0.461	0.38	1.30505e-18	Acat2	dOFTm	Two-sided Wilcoxon test	0.25	25
2.65159e-10	0.254731	0.539	0.505	6.227e-06	Tnrc18	dOFTm	Two-sided Wilcoxon test	0.25	25
2.96222e-13	0.254484	0.349	0.292	6.95647e-09	Rnf24	dOFTm	Two-sided Wilcoxon test	0.25	25
2.43879e-33	0.254453	0.347	0.224	5.72725e-29	Pygo1	dOFTm	Two-sided Wilcoxon test	0.25	25
8.10621e-09	0.254212	0.491	0.444	0.000190366	Cep112	dOFTm	Two-sided Wilcoxon test	0.25	25
1.80048e-16	0.253996	0.661	0.653	4.22824e-12	Rtf1	dOFTm	Two-sided Wilcoxon test	0.25	25
3.58832e-06	0.253988	0.533	0.533	0.0842681	Elp4	dOFTm	Two-sided Wilcoxon test	0.25	25
3.86949e-10	0.253767	0.467	0.44	9.08712e-06	BC005561	dOFTm	Two-sided Wilcoxon test	0.25	25
4.05748e-12	0.253503	0.564	0.555	9.52859e-08	Cpne1	dOFTm	Two-sided Wilcoxon test	0.25	25
1.57741e-13	0.253344	0.73	0.715	3.7044e-09	Ash1l	dOFTm	Two-sided Wilcoxon test	0.25	25
8.18037e-28	0.253309	0.783	0.805	1.92108e-23	Ddx39b	dOFTm	Two-sided Wilcoxon test	0.25	25
1.24385e-11	0.25313	0.342	0.282	2.92106e-07	Pcbp3	dOFTm	Two-sided Wilcoxon test	0.25	25
3.33947e-19	0.252923	0.716	0.724	7.8424e-15	Pnn	dOFTm	Two-sided Wilcoxon test	0.25	25
1.06041e-17	0.252891	0.675	0.674	2.49026e-13	Hp1bp3	dOFTm	Two-sided Wilcoxon test	0.25	25
1.18306e-44	0.252677	0.265	0.135	2.77829e-40	Rgma	dOFTm	Two-sided Wilcoxon test	0.25	25
3.30337e-10	0.252301	0.511	0.486	7.75764e-06	Dzip3	dOFTm	Two-sided Wilcoxon test	0.25	25
6.56494e-14	0.252079	0.334	0.262	1.54171e-09	Nox4	dOFTm	Two-sided Wilcoxon test	0.25	25
1.32805e-08	0.252076	0.582	0.575	0.000311879	Cdc42se2	dOFTm	Two-sided Wilcoxon test	0.25	25
3.52695e-21	0.251839	0.804	0.795	8.28269e-17	Prpf40a	dOFTm	Two-sided Wilcoxon test	0.25	25
7.77753e-10	0.251829	0.647	0.656	1.82648e-05	Drg1	dOFTm	Two-sided Wilcoxon test	0.25	25
1.63497e-18	0.251747	0.48	0.413	3.83957e-14	Ift74	dOFTm	Two-sided Wilcoxon test	0.25	25
1.1869e-06	0.251745	0.583	0.578	0.027873	Dtl	dOFTm	Two-sided Wilcoxon test	0.25	25
1.10143e-25	0.251624	0.295	0.187	2.58659e-21	Crispld1	dOFTm	Two-sided Wilcoxon test	0.25	25
1.82078e-19	0.251601	0.767	0.785	4.27592e-15	Syncrip	dOFTm	Two-sided Wilcoxon test	0.25	25
4.33999e-35	0.251578	0.897	0.929	1.0192e-30	Srsf3	dOFTm	Two-sided Wilcoxon test	0.25	25
4.6392e-21	0.251367	0.748	0.758	1.08947e-16	Paip2	dOFTm	Two-sided Wilcoxon test	0.25	25
7.09763e-08	0.251354	0.638	0.648	0.00166681	Rngtt	dOFTm	Two-sided Wilcoxon test	0.25	25
0.00058591	0.251177	0.254	0.221	1	Ctnna2	dOFTm	Two-sided Wilcoxon test	0.25	25
2.59651e-09	0.25117	0.71	0.692	6.09766e-05	Ncoa2	dOFTm	Two-sided Wilcoxon test	0.25	25
6.84753e-09	0.250878	0.42	0.385	0.000160807	Spire1	dOFTm	Two-sided Wilcoxon test	0.25	25
2.21403e-11	0.250857	0.725	0.724	5.19943e-07	Mkln1	dOFTm	Two-sided Wilcoxon test	0.25	25
0.000329766	0.250795	0.478	0.487	1	Avl9	dOFTm	Two-sided Wilcoxon test	0.25	25
5.54709e-13	0.250719	0.593	0.567	1.30268e-08	Elp1	dOFTm	Two-sided Wilcoxon test	0.25	25
6.45575e-12	0.250645	0.648	0.63	1.51607e-07	Brwd1	dOFTm	Two-sided Wilcoxon test	0.25	25
5.63613e-09	0.250534	0.426	0.387	0.000132359	1110051M20Rik	dOFTm	Two-sided Wilcoxon test	0.25	25
2.43752e-08	0.250002	0.6	0.598	0.000572427	Zzz3	dOFTm	Two-sided Wilcoxon test	0.25	25
0	4.64784	1	1	0	Hba-x	Ery	Two-sided Wilcoxon test	0.25	25
0	4.62885	1	1	0	Hbb-y	Ery	Two-sided Wilcoxon test	0.25	25
0	4.60141	1	0.962	0	Hbb-bh1	Ery	Two-sided Wilcoxon test	0.25	25
0	4.42412	0.999	0.973	0	Hba-a1	Ery	Two-sided Wilcoxon test	0.25	25
0	4.31978	0.997	0.892	0	Hba-a2	Ery	Two-sided Wilcoxon test	0.25	25
0	4.07925	0.963	0.593	0	Hbb-bt	Ery	Two-sided Wilcoxon test	0.25	25
0	3.27205	0.964	0.297	0	Car2	Ery	Two-sided Wilcoxon test	0.25	25
0	3.2079	0.975	0.26	0	Slc25a37	Ery	Two-sided Wilcoxon test	0.25	25
0	3.17551	0.959	0.084	0	Slc25a21	Ery	Two-sided Wilcoxon test	0.25	25
0	3.15893	0.951	0.463	0	Mt1	Ery	Two-sided Wilcoxon test	0.25	25
0	3.05748	0.78	0.189	0	Hbb-bs	Ery	Two-sided Wilcoxon test	0.25	25
0	2.84796	0.996	0.982	0	Fth1	Ery	Two-sided Wilcoxon test	0.25	25
0	2.59511	0.949	0.071	0	Slc4a1	Ery	Two-sided Wilcoxon test	0.25	25
0	2.5801	0.946	0.717	0	Gpx1	Ery	Two-sided Wilcoxon test	0.25	25
0	2.52897	0.904	0.353	0	Mgst3	Ery	Two-sided Wilcoxon test	0.25	25
0	2.43487	0.917	0.426	0	Blvrb	Ery	Two-sided Wilcoxon test	0.25	25
0	2.42959	0.938	0.087	0	Rhd	Ery	Two-sided Wilcoxon test	0.25	25
0	2.41892	0.917	0.044	0	Kel	Ery	Two-sided Wilcoxon test	0.25	25
0	2.39767	0.91	0.093	0	Gypa	Ery	Two-sided Wilcoxon test	0.25	25
0	2.35884	0.9	0.076	0	Hemgn	Ery	Two-sided Wilcoxon test	0.25	25
0	2.32069	0.929	0.326	0	Cpox	Ery	Two-sided Wilcoxon test	0.25	25
0	2.31461	0.951	0.595	0	Nudt4	Ery	Two-sided Wilcoxon test	0.25	25
0	2.23893	0.911	0.094	0	Sptb	Ery	Two-sided Wilcoxon test	0.25	25
0	2.23233	0.904	0.101	0	Alas2	Ery	Two-sided Wilcoxon test	0.25	25
0	2.17272	0.902	0.088	0	Ank1	Ery	Two-sided Wilcoxon test	0.25	25
0	2.08217	0.943	0.412	0	Hmbs	Ery	Two-sided Wilcoxon test	0.25	25
0	2.07029	0.917	0.298	0	Atp8a1	Ery	Two-sided Wilcoxon test	0.25	25
0	2.06317	0.868	0.131	0	Mt2	Ery	Two-sided Wilcoxon test	0.25	25
0	1.97755	0.9	0.056	0	Ermap	Ery	Two-sided Wilcoxon test	0.25	25
0	1.95565	0.833	0.072	0	Reln	Ery	Two-sided Wilcoxon test	0.25	25
0	1.94653	0.866	0.088	0	Snca	Ery	Two-sided Wilcoxon test	0.25	25
0	1.86712	0.866	0.067	0	Acp5	Ery	Two-sided Wilcoxon test	0.25	25
0	1.86594	0.904	0.306	0	Fech	Ery	Two-sided Wilcoxon test	0.25	25
0	1.82579	0.847	0.292	0	Bpgm	Ery	Two-sided Wilcoxon test	0.25	25
0	1.8241	0.979	0.905	0	Prdx2	Ery	Two-sided Wilcoxon test	0.25	25
0	1.77105	0.844	0.049	0	Spta1	Ery	Two-sided Wilcoxon test	0.25	25
0	1.76951	0.849	0.185	0	Pnpo	Ery	Two-sided Wilcoxon test	0.25	25
0	1.74001	0.886	0.387	0	Gclm	Ery	Two-sided Wilcoxon test	0.25	25
0	1.72406	0.848	0.237	0	Fam210b	Ery	Two-sided Wilcoxon test	0.25	25
0	1.70786	0.841	0.064	0	Tspan33	Ery	Two-sided Wilcoxon test	0.25	25
0	1.70734	0.863	0.182	0	Slc39a8	Ery	Two-sided Wilcoxon test	0.25	25
0	1.62221	0.872	0.314	0	Tfrc	Ery	Two-sided Wilcoxon test	0.25	25
0	1.61072	0.911	0.682	0	Glrx5	Ery	Two-sided Wilcoxon test	0.25	25
0	1.60634	0.823	0.1	0	Cited4	Ery	Two-sided Wilcoxon test	0.25	25
0	1.60479	0.897	0.652	0	Tmem14c	Ery	Two-sided Wilcoxon test	0.25	25
0	1.595	0.814	0.037	0	Rhag	Ery	Two-sided Wilcoxon test	0.25	25
0	1.5621	0.607	0.087	0	Cacna2d3	Ery	Two-sided Wilcoxon test	0.25	25
0	1.56123	0.811	0.132	0	Pkhd1l1	Ery	Two-sided Wilcoxon test	0.25	25
0	1.55274	0.861	0.359	0	Urod	Ery	Two-sided Wilcoxon test	0.25	25
0	1.52944	0.829	0.248	0	Ell2	Ery	Two-sided Wilcoxon test	0.25	25
0	1.48069	0.753	0.156	0	March3	Ery	Two-sided Wilcoxon test	0.25	25
0	1.47936	0.813	0.312	0	Cpeb4	Ery	Two-sided Wilcoxon test	0.25	25
0	1.47315	0.855	0.255	0	Gmpr	Ery	Two-sided Wilcoxon test	0.25	25
0	1.45403	0.782	0.308	0	Hebp1	Ery	Two-sided Wilcoxon test	0.25	25
0	1.42942	0.843	0.398	0	Creg1	Ery	Two-sided Wilcoxon test	0.25	25
0	1.39293	0.786	0.175	0	Abcb10	Ery	Two-sided Wilcoxon test	0.25	25
0	1.33725	0.737	0.026	0	Epb42	Ery	Two-sided Wilcoxon test	0.25	25
0	1.28841	0.694	0.075	0	Ikzf1	Ery	Two-sided Wilcoxon test	0.25	25
0	1.26652	0.817	0.383	0	Pim1	Ery	Two-sided Wilcoxon test	0.25	25
0	1.20444	0.714	0.048	0	Icam4	Ery	Two-sided Wilcoxon test	0.25	25
0	1.17	0.719	0.13	0	Ube2l6	Ery	Two-sided Wilcoxon test	0.25	25
0	1.16888	0.778	0.301	0	Ucp2	Ery	Two-sided Wilcoxon test	0.25	25
0	1.1542	0.775	0.329	0	Alad	Ery	Two-sided Wilcoxon test	0.25	25
0	1.15285	0.602	0.031	0	Hsd3b6	Ery	Two-sided Wilcoxon test	0.25	25
0	1.14881	0.686	0.024	0	Trim10	Ery	Two-sided Wilcoxon test	0.25	25
0	1.1227	0.994	0.978	0	Ftl1	Ery	Two-sided Wilcoxon test	0.25	25
0	1.11752	0.666	0.027	0	Slc30a10	Ery	Two-sided Wilcoxon test	0.25	25
0	1.0811	0.687	0.116	0	Tal1	Ery	Two-sided Wilcoxon test	0.25	25
0	1.04761	0.662	0.149	0	Fam117a	Ery	Two-sided Wilcoxon test	0.25	25
0	1.01884	0.726	0.243	0	Ptp4a3	Ery	Two-sided Wilcoxon test	0.25	25
0	0.999729	0.745	0.286	0	March2	Ery	Two-sided Wilcoxon test	0.25	25
0	0.997324	0.539	0.018	0	5430401H09Rik	Ery	Two-sided Wilcoxon test	0.25	25
0	0.956264	0.63	0.086	0	Add2	Ery	Two-sided Wilcoxon test	0.25	25
0	0.952988	0.69	0.19	0	Rfesd	Ery	Two-sided Wilcoxon test	0.25	25
0	0.945075	0.661	0.053	0	Klf1	Ery	Two-sided Wilcoxon test	0.25	25
0	0.935256	0.631	0.045	0	Ncf4	Ery	Two-sided Wilcoxon test	0.25	25
0	0.933707	0.587	0.018	0	Pdzk1ip1	Ery	Two-sided Wilcoxon test	0.25	25
0	0.929432	0.556	0.023	0	Slc22a4	Ery	Two-sided Wilcoxon test	0.25	25
0	0.855296	0.529	0.033	0	Kcnn4	Ery	Two-sided Wilcoxon test	0.25	25
0	0.784012	0.616	0.162	0	Fam241a	Ery	Two-sided Wilcoxon test	0.25	25
0	0.780205	0.47	0.051	0	Mir142hg	Ery	Two-sided Wilcoxon test	0.25	25
0	0.719176	0.484	0.042	0	Epor	Ery	Two-sided Wilcoxon test	0.25	25
0	0.70497	0.555	0.018	0	Hbq1b	Ery	Two-sided Wilcoxon test	0.25	25
0	0.684414	0.514	0.065	0	Tent5c	Ery	Two-sided Wilcoxon test	0.25	25
0	0.681639	0.492	0.022	0	Cfap57	Ery	Two-sided Wilcoxon test	0.25	25
0	0.671453	0.536	0.085	0	Uros	Ery	Two-sided Wilcoxon test	0.25	25
0	0.667338	0.509	0.062	0	Dhrs11	Ery	Two-sided Wilcoxon test	0.25	25
0	0.664491	0.499	0.081	0	Dapk2	Ery	Two-sided Wilcoxon test	0.25	25
0	0.657973	0.468	0.019	0	Grap2	Ery	Two-sided Wilcoxon test	0.25	25
0	0.638374	0.463	0.056	0	Slc6a9	Ery	Two-sided Wilcoxon test	0.25	25
0	0.621038	0.437	0.035	0	1300017J02Rik	Ery	Two-sided Wilcoxon test	0.25	25
0	0.617991	0.491	0.053	0	Xk	Ery	Two-sided Wilcoxon test	0.25	25
0	0.597184	0.481	0.016	0	Lmx1a	Ery	Two-sided Wilcoxon test	0.25	25
0	0.591181	0.447	0.039	0	Dmtn	Ery	Two-sided Wilcoxon test	0.25	25
0	0.578324	0.474	0.038	0	Gata1	Ery	Two-sided Wilcoxon test	0.25	25
0	0.57507	0.464	0.027	0	Plek2	Ery	Two-sided Wilcoxon test	0.25	25
0	0.559042	0.437	0.069	0	Tspan32	Ery	Two-sided Wilcoxon test	0.25	25
0	0.556457	0.417	0.024	0	Pklr	Ery	Two-sided Wilcoxon test	0.25	25
0	0.547276	0.357	0.018	0	Gm43154	Ery	Two-sided Wilcoxon test	0.25	25
0	0.537743	0.44	0.048	0	Slc38a5	Ery	Two-sided Wilcoxon test	0.25	25
0	0.53589	0.428	0.016	0	Cldn13	Ery	Two-sided Wilcoxon test	0.25	25
0	0.529948	0.378	0.039	0	Tmem56	Ery	Two-sided Wilcoxon test	0.25	25
0	0.488937	0.392	0.053	0	Steap3	Ery	Two-sided Wilcoxon test	0.25	25
0	0.463771	0.382	0.019	0	Redrum	Ery	Two-sided Wilcoxon test	0.25	25
0	0.445763	0.341	0.014	0	Gm16867	Ery	Two-sided Wilcoxon test	0.25	25
0	0.440588	0.372	0.008	0	Gm2061	Ery	Two-sided Wilcoxon test	0.25	25
0	0.440279	0.337	0.009	0	Ccdc92b	Ery	Two-sided Wilcoxon test	0.25	25
0	0.415547	0.273	0.008	0	Aqp8	Ery	Two-sided Wilcoxon test	0.25	25
0	0.397336	0.337	0.009	0	Aqp3	Ery	Two-sided Wilcoxon test	0.25	25
0	0.382058	0.299	0.006	0	Gm867	Ery	Two-sided Wilcoxon test	0.25	25
0	0.361204	0.276	0.016	0	Ache	Ery	Two-sided Wilcoxon test	0.25	25
0	0.344907	0.336	0.031	0	Nfe2	Ery	Two-sided Wilcoxon test	0.25	25
0	0.329592	0.31	0.01	0	Gm32051	Ery	Two-sided Wilcoxon test	0.25	25
0	0.327772	0.295	0.027	0	Gfi1b	Ery	Two-sided Wilcoxon test	0.25	25
0	0.32353	0.284	0.015	0	6030468B19Rik	Ery	Two-sided Wilcoxon test	0.25	25
0	0.306115	0.254	0.008	0	Adra2b	Ery	Two-sided Wilcoxon test	0.25	25
8.10517e-308	0.674234	0.504	0.105	1.90342e-303	E2f2	Ery	Two-sided Wilcoxon test	0.25	25
7.43971e-302	1.33769	0.83	0.415	1.74714e-297	Bmp2k	Ery	Two-sided Wilcoxon test	0.25	25
6.91966e-296	1.06798	0.742	0.327	1.62501e-291	Ncoa4	Ery	Two-sided Wilcoxon test	0.25	25
4.2997e-294	0.641592	0.554	0.139	1.00974e-289	Ppox	Ery	Two-sided Wilcoxon test	0.25	25
1.34577e-293	0.351196	0.36	0.049	3.16041e-289	Svip	Ery	Two-sided Wilcoxon test	0.25	25
2.00058e-289	0.881944	0.682	0.24	4.69816e-285	Ssx2ip	Ery	Two-sided Wilcoxon test	0.25	25
4.14329e-286	0.928876	0.596	0.161	9.7301e-282	Slc16a10	Ery	Two-sided Wilcoxon test	0.25	25
7.60656e-283	0.323186	0.252	0.021	1.78632e-278	Ypel4	Ery	Two-sided Wilcoxon test	0.25	25
2.37943e-270	0.86797	0.707	0.245	5.58786e-266	Smim1	Ery	Two-sided Wilcoxon test	0.25	25
1.42617e-269	1.36497	0.922	0.547	3.34922e-265	Mki67	Ery	Two-sided Wilcoxon test	0.25	25
3.33608e-268	1.32253	0.941	0.686	7.83446e-264	Epb41	Ery	Two-sided Wilcoxon test	0.25	25
1.0346e-260	1.04217	0.778	0.39	2.42966e-256	Nt5c3	Ery	Two-sided Wilcoxon test	0.25	25
2.90777e-260	1.01281	0.748	0.37	6.82861e-256	Ubac1	Ery	Two-sided Wilcoxon test	0.25	25
3.72264e-255	0.952191	0.743	0.375	8.74225e-251	Josd2	Ery	Two-sided Wilcoxon test	0.25	25
4.25243e-254	0.77578	0.666	0.234	9.9864e-250	Cd59a	Ery	Two-sided Wilcoxon test	0.25	25
3.5655e-253	0.37982	0.314	0.043	8.37322e-249	Acss1	Ery	Two-sided Wilcoxon test	0.25	25
1.44993e-248	0.739573	0.565	0.156	3.40502e-244	Zc3hav1	Ery	Two-sided Wilcoxon test	0.25	25
3.71339e-244	0.629204	0.474	0.112	8.72052e-240	Nmnat3	Ery	Two-sided Wilcoxon test	0.25	25
1.52991e-241	0.616987	0.484	0.117	3.59284e-237	Ston2	Ery	Two-sided Wilcoxon test	0.25	25
7.93902e-240	1.04543	0.669	0.265	1.8644e-235	Sgk3	Ery	Two-sided Wilcoxon test	0.25	25
3.51207e-237	0.634372	0.519	0.149	8.24776e-233	Pigq	Ery	Two-sided Wilcoxon test	0.25	25
2.11064e-229	0.965535	0.628	0.211	4.95663e-225	Ano1	Ery	Two-sided Wilcoxon test	0.25	25
7.80487e-228	0.54721	0.44	0.105	1.8329e-223	Cdc25b	Ery	Two-sided Wilcoxon test	0.25	25
8.44787e-225	0.856395	0.709	0.326	1.9839e-220	Prr13	Ery	Two-sided Wilcoxon test	0.25	25
1.05043e-223	0.755114	0.511	0.14	2.46683e-219	Pde10a	Ery	Two-sided Wilcoxon test	0.25	25
8.84573e-220	0.785553	0.965	0.889	2.07733e-215	Anp32b	Ery	Two-sided Wilcoxon test	0.25	25
3.54427e-217	1.04283	0.866	0.581	8.32336e-213	Serinc3	Ery	Two-sided Wilcoxon test	0.25	25
1.66282e-212	0.701528	0.594	0.217	3.90498e-208	Ifrd2	Ery	Two-sided Wilcoxon test	0.25	25
1.10107e-210	0.312452	0.353	0.065	2.58575e-206	Tuba4a	Ery	Two-sided Wilcoxon test	0.25	25
9.82601e-210	0.655274	0.984	0.957	2.30754e-205	Rpl14	Ery	Two-sided Wilcoxon test	0.25	25
3.07337e-205	0.478003	0.468	0.128	7.2175e-201	Rbm38	Ery	Two-sided Wilcoxon test	0.25	25
9.73352e-205	0.771083	0.386	0.085	2.28582e-200	Rapgef4	Ery	Two-sided Wilcoxon test	0.25	25
2.68122e-203	0.623013	0.993	0.985	6.29658e-199	Rpsa	Ery	Two-sided Wilcoxon test	0.25	25
2.99161e-201	0.416423	0.437	0.115	7.0255e-197	Tmem238	Ery	Two-sided Wilcoxon test	0.25	25
1.65644e-199	1.59849	0.914	0.637	3.88998e-195	St6galnac3	Ery	Two-sided Wilcoxon test	0.25	25
6.27326e-199	0.956598	0.634	0.26	1.47321e-194	Frrs1	Ery	Two-sided Wilcoxon test	0.25	25
1.3237e-195	0.629746	0.595	0.193	3.10858e-191	Slc22a23	Ery	Two-sided Wilcoxon test	0.25	25
1.69906e-188	0.333285	0.269	0.042	3.99006e-184	Mfsd2b	Ery	Two-sided Wilcoxon test	0.25	25
3.00555e-186	0.998556	0.826	0.511	7.05824e-182	Abcg2	Ery	Two-sided Wilcoxon test	0.25	25
1.01842e-184	0.842813	0.703	0.378	2.39166e-180	Eif2ak1	Ery	Two-sided Wilcoxon test	0.25	25
1.8622e-183	0.80207	0.62	0.263	4.3732e-179	St3gal6	Ery	Two-sided Wilcoxon test	0.25	25
5.61104e-183	0.760917	0.549	0.189	1.3177e-178	Zdhhc14	Ery	Two-sided Wilcoxon test	0.25	25
9.61397e-178	0.550523	0.52	0.182	2.25775e-173	Lockd	Ery	Two-sided Wilcoxon test	0.25	25
1.49525e-177	0.489997	0.583	0.192	3.51144e-173	Tmod1	Ery	Two-sided Wilcoxon test	0.25	25
3.70861e-175	0.880433	0.737	0.35	8.7093e-171	Pip5k1b	Ery	Two-sided Wilcoxon test	0.25	25
5.30393e-175	0.825812	0.629	0.283	1.24558e-170	Slc20a1	Ery	Two-sided Wilcoxon test	0.25	25
1.89647e-174	0.64608	0.534	0.198	4.45366e-170	Gypc	Ery	Two-sided Wilcoxon test	0.25	25
1.08099e-173	0.676469	0.932	0.861	2.5386e-169	Atpif1	Ery	Two-sided Wilcoxon test	0.25	25
3.24324e-173	0.441232	0.468	0.147	7.61641e-169	Txnrd2	Ery	Two-sided Wilcoxon test	0.25	25
1.3066e-172	0.553109	0.507	0.173	3.06842e-168	Cox6b2	Ery	Two-sided Wilcoxon test	0.25	25
5.03196e-172	0.819932	0.742	0.494	1.18171e-167	Slc25a39	Ery	Two-sided Wilcoxon test	0.25	25
9.55589e-170	0.25726	0.255	0.042	2.24411e-165	Nrtn	Ery	Two-sided Wilcoxon test	0.25	25
7.05711e-168	0.497548	0.414	0.119	1.65729e-163	Gcnt1	Ery	Two-sided Wilcoxon test	0.25	25
1.02199e-167	0.729056	0.7	0.393	2.40003e-163	Prdx3	Ery	Two-sided Wilcoxon test	0.25	25
7.30999e-167	0.302106	0.317	0.067	1.71668e-162	Spns2	Ery	Two-sided Wilcoxon test	0.25	25
2.24227e-166	0.714595	0.882	0.777	5.26575e-162	Selenow	Ery	Two-sided Wilcoxon test	0.25	25
1.30386e-165	0.385552	0.276	0.052	3.06198e-161	D030028A08Rik	Ery	Two-sided Wilcoxon test	0.25	25
4.53617e-158	0.696138	0.635	0.304	1.06527e-153	Slc43a3	Ery	Two-sided Wilcoxon test	0.25	25
1.09416e-153	0.746652	0.608	0.277	2.56953e-149	Prkar2b	Ery	Two-sided Wilcoxon test	0.25	25
1.21556e-153	0.476426	0.524	0.189	2.85462e-149	Slc29a1	Ery	Two-sided Wilcoxon test	0.25	25
8.3215e-152	0.999969	0.89	0.656	1.95422e-147	Mbnl1	Ery	Two-sided Wilcoxon test	0.25	25
3.85696e-151	0.560287	0.99	0.98	9.0577e-147	Rplp0	Ery	Two-sided Wilcoxon test	0.25	25
1.29167e-149	0.461105	0.396	0.113	3.03336e-145	Rgcc	Ery	Two-sided Wilcoxon test	0.25	25
2.59595e-149	0.748387	0.79	0.578	6.09634e-145	Nars	Ery	Two-sided Wilcoxon test	0.25	25
2.44147e-148	0.776537	0.656	0.337	5.73355e-144	Trak2	Ery	Two-sided Wilcoxon test	0.25	25
1.02158e-147	0.306227	0.275	0.056	2.39908e-143	Slc40a1	Ery	Two-sided Wilcoxon test	0.25	25
4.13043e-146	0.347787	0.264	0.053	9.6999e-142	Wnk4	Ery	Two-sided Wilcoxon test	0.25	25
5.00065e-146	0.827092	0.866	0.678	1.17435e-141	Tubb4b	Ery	Two-sided Wilcoxon test	0.25	25
1.22718e-144	0.708925	0.564	0.236	2.88192e-140	Exoc6	Ery	Two-sided Wilcoxon test	0.25	25
2.45549e-142	0.649482	0.877	0.738	5.76647e-138	Arf5	Ery	Two-sided Wilcoxon test	0.25	25
9.08992e-142	0.670366	0.721	0.469	2.13468e-137	Bola3	Ery	Two-sided Wilcoxon test	0.25	25
1.63249e-141	0.303886	0.325	0.082	3.83373e-137	Ankrd9	Ery	Two-sided Wilcoxon test	0.25	25
3.26145e-141	0.607407	0.596	0.278	7.65918e-137	Hist1h4i	Ery	Two-sided Wilcoxon test	0.25	25
3.29398e-140	0.635727	0.932	0.821	7.73559e-136	Pabpc1	Ery	Two-sided Wilcoxon test	0.25	25
2.15055e-139	0.701025	0.658	0.34	5.05035e-135	Cenpk	Ery	Two-sided Wilcoxon test	0.25	25
1.14309e-137	0.678695	0.756	0.5	2.68444e-133	Rexo2	Ery	Two-sided Wilcoxon test	0.25	25
2.13775e-135	0.94028	0.755	0.468	5.0203e-131	Clcn3	Ery	Two-sided Wilcoxon test	0.25	25
8.03645e-135	0.463135	0.45	0.164	1.88728e-130	Slc43a1	Ery	Two-sided Wilcoxon test	0.25	25
4.53379e-133	0.396431	0.338	0.094	1.06471e-128	Tmcc2	Ery	Two-sided Wilcoxon test	0.25	25
1.62955e-131	0.455537	0.461	0.172	3.82683e-127	Arrb1	Ery	Two-sided Wilcoxon test	0.25	25
9.12319e-130	0.554486	0.994	0.984	2.14249e-125	Rps2	Ery	Two-sided Wilcoxon test	0.25	25
1.66666e-128	0.406203	0.458	0.18	3.91398e-124	1700037H04Rik	Ery	Two-sided Wilcoxon test	0.25	25
5.19843e-127	0.454012	0.262	0.06	1.2208e-122	Gm14066	Ery	Two-sided Wilcoxon test	0.25	25
9.11165e-127	0.700294	0.532	0.237	2.13978e-122	Slc23a2	Ery	Two-sided Wilcoxon test	0.25	25
1.70661e-125	0.484614	0.507	0.214	4.00781e-121	Cdkn3	Ery	Two-sided Wilcoxon test	0.25	25
1.74749e-124	0.406822	0.425	0.145	4.10381e-120	Tinagl1	Ery	Two-sided Wilcoxon test	0.25	25
1.4654e-123	0.366406	0.339	0.1	3.44133e-119	Sh3yl1	Ery	Two-sided Wilcoxon test	0.25	25
7.48031e-123	0.655277	0.712	0.473	1.75668e-118	H2afj	Ery	Two-sided Wilcoxon test	0.25	25
3.55649e-120	0.429443	0.516	0.22	8.35207e-116	Grina	Ery	Two-sided Wilcoxon test	0.25	25
9.53223e-120	0.358922	0.404	0.144	2.23855e-115	Gadd45a	Ery	Two-sided Wilcoxon test	0.25	25
1.38006e-117	0.487122	0.582	0.286	3.24094e-113	Asns	Ery	Two-sided Wilcoxon test	0.25	25
1.44324e-116	0.475537	0.381	0.129	3.38931e-112	Dennd2c	Ery	Two-sided Wilcoxon test	0.25	25
5.82674e-116	0.600456	0.87	0.733	1.36835e-111	Hdgf	Ery	Two-sided Wilcoxon test	0.25	25
1.61679e-115	0.45929	0.618	0.334	3.79687e-111	Cox17	Ery	Two-sided Wilcoxon test	0.25	25
3.06822e-115	0.494103	0.801	0.573	7.2054e-111	Ctsb	Ery	Two-sided Wilcoxon test	0.25	25
1.13368e-114	0.455554	0.295	0.081	2.66234e-110	Nup210	Ery	Two-sided Wilcoxon test	0.25	25
3.20527e-114	0.433547	0.961	0.925	7.52726e-110	Oaz1	Ery	Two-sided Wilcoxon test	0.25	25
8.60084e-111	0.611417	0.839	0.706	2.01982e-106	Taldo1	Ery	Two-sided Wilcoxon test	0.25	25
1.06518e-110	0.465165	0.649	0.352	2.50148e-106	Tspo	Ery	Two-sided Wilcoxon test	0.25	25
1.82461e-110	0.650744	0.678	0.399	4.28492e-106	St3gal5	Ery	Two-sided Wilcoxon test	0.25	25
1.75756e-107	0.468513	0.621	0.361	4.12745e-103	Snrnp25	Ery	Two-sided Wilcoxon test	0.25	25
3.00649e-107	0.623135	0.535	0.266	7.06043e-103	Fbxo34	Ery	Two-sided Wilcoxon test	0.25	25
2.01899e-106	0.365573	0.447	0.179	4.7414e-102	Rab3il1	Ery	Two-sided Wilcoxon test	0.25	25
4.18823e-105	0.569808	0.824	0.651	9.83564e-101	March5	Ery	Two-sided Wilcoxon test	0.25	25
5.93607e-105	0.505316	0.944	0.916	1.39403e-100	Rpl23a	Ery	Two-sided Wilcoxon test	0.25	25
3.73843e-102	0.41416	0.565	0.3	8.77933e-98	Pop5	Ery	Two-sided Wilcoxon test	0.25	25
5.41314e-102	0.413246	0.413	0.165	1.27122e-97	Tango2	Ery	Two-sided Wilcoxon test	0.25	25
6.98312e-102	0.923555	0.876	0.707	1.63992e-97	Hipk2	Ery	Two-sided Wilcoxon test	0.25	25
4.21873e-101	0.347712	0.443	0.192	9.90727e-97	Mpst	Ery	Two-sided Wilcoxon test	0.25	25
2.39566e-100	0.733727	0.633	0.355	5.62597e-96	Zfp367	Ery	Two-sided Wilcoxon test	0.25	25
4.43397e-99	0.427892	0.977	0.956	1.04127e-94	Rps15	Ery	Two-sided Wilcoxon test	0.25	25
8.03417e-98	0.705344	0.841	0.665	1.88674e-93	Kif2a	Ery	Two-sided Wilcoxon test	0.25	25
9.9059e-98	0.509585	0.589	0.328	2.3263e-93	Mthfd2	Ery	Two-sided Wilcoxon test	0.25	25
1.64738e-97	0.380151	0.391	0.153	3.8687e-93	Slc25a38	Ery	Two-sided Wilcoxon test	0.25	25
1.26617e-96	0.55686	0.799	0.663	2.97348e-92	Acp1	Ery	Two-sided Wilcoxon test	0.25	25
1.11234e-95	0.630675	0.699	0.452	2.61221e-91	Hist1h1c	Ery	Two-sided Wilcoxon test	0.25	25
5.11631e-94	0.510509	0.601	0.363	1.20151e-89	Pycr2	Ery	Two-sided Wilcoxon test	0.25	25
2.37979e-92	0.620779	0.552	0.296	5.5887e-88	Cep70	Ery	Two-sided Wilcoxon test	0.25	25
4.1678e-92	0.811966	0.86	0.569	9.78767e-88	Diaph3	Ery	Two-sided Wilcoxon test	0.25	25
8.71049e-91	0.418572	0.424	0.185	2.04557e-86	Cep76	Ery	Two-sided Wilcoxon test	0.25	25
3.59756e-90	0.547942	0.83	0.664	8.4485e-86	Ccnd3	Ery	Two-sided Wilcoxon test	0.25	25
7.7235e-89	0.334181	0.999	0.996	1.81379e-84	Rpl13	Ery	Two-sided Wilcoxon test	0.25	25
8.33005e-89	0.388879	0.355	0.134	1.95623e-84	Rffl	Ery	Two-sided Wilcoxon test	0.25	25
1.30383e-88	0.52663	0.472	0.22	3.06191e-84	Neil3	Ery	Two-sided Wilcoxon test	0.25	25
3.16574e-88	0.429373	0.366	0.145	7.43442e-84	Rnf123	Ery	Two-sided Wilcoxon test	0.25	25
1.79328e-86	0.320654	0.355	0.138	4.21135e-82	Apeh	Ery	Two-sided Wilcoxon test	0.25	25
6.66819e-86	0.53249	0.861	0.735	1.56596e-81	Prdx6	Ery	Two-sided Wilcoxon test	0.25	25
3.29068e-85	0.321227	0.409	0.182	7.72783e-81	Ppp1r9b	Ery	Two-sided Wilcoxon test	0.25	25
1.28909e-82	0.544598	0.658	0.375	3.0273e-78	Hmmr	Ery	Two-sided Wilcoxon test	0.25	25
1.79453e-82	0.461354	0.558	0.317	4.21427e-78	Mkrn1	Ery	Two-sided Wilcoxon test	0.25	25
9.24008e-82	0.427736	0.362	0.142	2.16994e-77	Aim2	Ery	Two-sided Wilcoxon test	0.25	25
1.92801e-81	0.395727	0.517	0.281	4.52773e-77	Isca1	Ery	Two-sided Wilcoxon test	0.25	25
2.5342e-81	0.322453	0.361	0.147	5.95131e-77	Smox	Ery	Two-sided Wilcoxon test	0.25	25
2.59985e-80	0.262059	0.305	0.111	6.10548e-76	Chac2	Ery	Two-sided Wilcoxon test	0.25	25
1.26652e-79	0.446175	0.4	0.178	2.97429e-75	Tnfrsf21	Ery	Two-sided Wilcoxon test	0.25	25
1.44454e-79	0.690285	0.641	0.416	3.39237e-75	Agpat4	Ery	Two-sided Wilcoxon test	0.25	25
8.51704e-79	0.491295	0.712	0.545	2.00014e-74	Mrpl23	Ery	Two-sided Wilcoxon test	0.25	25
4.73111e-77	0.53548	0.86	0.681	1.11105e-72	Hist1h1e	Ery	Two-sided Wilcoxon test	0.25	25
3.31155e-76	0.318699	0.992	0.993	7.77684e-72	Rps8	Ery	Two-sided Wilcoxon test	0.25	25
3.75792e-76	0.505517	0.583	0.336	8.8251e-72	Hist1h3c	Ery	Two-sided Wilcoxon test	0.25	25
1.56826e-75	0.42588	0.899	0.839	3.6829e-71	Sec61g	Ery	Two-sided Wilcoxon test	0.25	25
1.70484e-74	0.469074	0.612	0.386	4.00365e-70	Fignl1	Ery	Two-sided Wilcoxon test	0.25	25
3.0124e-74	0.389109	0.451	0.221	7.07433e-70	Vangl1	Ery	Two-sided Wilcoxon test	0.25	25
4.6552e-74	0.452282	0.628	0.42	1.09323e-69	Ehd1	Ery	Two-sided Wilcoxon test	0.25	25
6.23382e-74	0.576515	0.694	0.486	1.46395e-69	Lbr	Ery	Two-sided Wilcoxon test	0.25	25
1.78393e-73	0.531372	0.756	0.58	4.18939e-69	Pabpc4	Ery	Two-sided Wilcoxon test	0.25	25
3.91498e-73	0.357776	0.346	0.146	9.19393e-69	Katnb1	Ery	Two-sided Wilcoxon test	0.25	25
4.53022e-72	0.534984	0.423	0.212	1.06388e-67	Mylip	Ery	Two-sided Wilcoxon test	0.25	25
1.20053e-70	0.570966	0.651	0.399	2.81932e-66	Dleu2	Ery	Two-sided Wilcoxon test	0.25	25
1.605e-70	0.371248	0.984	0.973	3.76919e-66	Rplp1	Ery	Two-sided Wilcoxon test	0.25	25
2.06751e-70	0.357948	0.529	0.291	4.85535e-66	Zfpm1	Ery	Two-sided Wilcoxon test	0.25	25
3.69746e-70	0.296965	0.379	0.173	8.68311e-66	Hist1h2bj	Ery	Two-sided Wilcoxon test	0.25	25
1.36345e-69	0.463851	0.48	0.25	3.20192e-65	Esco2	Ery	Two-sided Wilcoxon test	0.25	25
8.5667e-69	0.513185	0.566	0.329	2.0118e-64	Cit	Ery	Two-sided Wilcoxon test	0.25	25
5.96328e-68	0.389684	0.583	0.374	1.40042e-63	Fxn	Ery	Two-sided Wilcoxon test	0.25	25
1.88644e-67	0.460078	0.596	0.385	4.43011e-63	Narf	Ery	Two-sided Wilcoxon test	0.25	25
2.71141e-67	0.367203	0.506	0.278	6.36747e-63	Cdr2	Ery	Two-sided Wilcoxon test	0.25	25
1.14847e-65	0.370709	0.298	0.119	2.69708e-61	Depdc1b	Ery	Two-sided Wilcoxon test	0.25	25
2.57455e-65	0.329088	0.398	0.194	6.04608e-61	Fbxo7	Ery	Two-sided Wilcoxon test	0.25	25
5.17278e-65	0.420086	0.512	0.294	1.21478e-60	Tuba1c	Ery	Two-sided Wilcoxon test	0.25	25
9.8885e-64	0.367895	0.408	0.207	2.32221e-59	Brpf3	Ery	Two-sided Wilcoxon test	0.25	25
3.56458e-63	0.303653	0.305	0.127	8.37105e-59	Slc11a2	Ery	Two-sided Wilcoxon test	0.25	25
1.21445e-62	0.311511	0.981	0.964	2.85201e-58	Rpl13a	Ery	Two-sided Wilcoxon test	0.25	25
1.57194e-62	0.556306	0.621	0.421	3.69154e-58	Hace1	Ery	Two-sided Wilcoxon test	0.25	25
2.419e-62	0.394858	0.453	0.248	5.68079e-58	Mindy2	Ery	Two-sided Wilcoxon test	0.25	25
5.45475e-60	0.663609	0.82	0.654	1.28099e-55	Evi5	Ery	Two-sided Wilcoxon test	0.25	25
6.62692e-60	0.38042	0.337	0.148	1.55627e-55	Cpeb3	Ery	Two-sided Wilcoxon test	0.25	25
8.58223e-60	0.575162	0.544	0.332	2.01545e-55	Gclc	Ery	Two-sided Wilcoxon test	0.25	25
3.19495e-59	0.603242	0.572	0.378	7.50302e-55	Ranbp10	Ery	Two-sided Wilcoxon test	0.25	25
3.28749e-59	0.468283	0.821	0.678	7.72034e-55	Rnf10	Ery	Two-sided Wilcoxon test	0.25	25
4.25924e-59	0.384485	0.786	0.684	1.00024e-54	Ndufa6	Ery	Two-sided Wilcoxon test	0.25	25
4.45803e-59	0.300528	0.391	0.184	1.04692e-54	Larp1b	Ery	Two-sided Wilcoxon test	0.25	25
1.01014e-57	0.425558	0.576	0.388	2.37221e-53	Eif2b3	Ery	Two-sided Wilcoxon test	0.25	25
3.80453e-57	0.358791	0.315	0.142	8.93457e-53	Kif18b	Ery	Two-sided Wilcoxon test	0.25	25
4.78736e-56	0.34581	0.647	0.417	1.12426e-51	Cdca3	Ery	Two-sided Wilcoxon test	0.25	25
4.98515e-56	0.390625	0.803	0.696	1.17071e-51	Taf10	Ery	Two-sided Wilcoxon test	0.25	25
9.12032e-56	0.371229	0.511	0.325	2.14182e-51	Rnaseh2a	Ery	Two-sided Wilcoxon test	0.25	25
9.18774e-56	0.303015	0.418	0.227	2.15765e-51	Snx15	Ery	Two-sided Wilcoxon test	0.25	25
2.60052e-55	0.445776	0.567	0.345	6.10705e-51	Nusap1	Ery	Two-sided Wilcoxon test	0.25	25
4.54637e-55	0.307984	0.314	0.144	1.06767e-50	Atg4d	Ery	Two-sided Wilcoxon test	0.25	25
1.25012e-54	0.375392	0.653	0.422	2.93578e-50	Ccnb2	Ery	Two-sided Wilcoxon test	0.25	25
3.0454e-54	0.447841	0.519	0.328	7.15183e-50	Aftph	Ery	Two-sided Wilcoxon test	0.25	25
2.6818e-53	0.474006	0.64	0.449	6.29794e-49	Nadk2	Ery	Two-sided Wilcoxon test	0.25	25
8.99678e-53	0.467197	0.467	0.274	2.1128e-48	Synj1	Ery	Two-sided Wilcoxon test	0.25	25
3.98635e-52	0.255882	0.317	0.148	9.36154e-48	Aunip	Ery	Two-sided Wilcoxon test	0.25	25
2.22609e-51	0.34657	0.538	0.356	5.22775e-47	Psme3	Ery	Two-sided Wilcoxon test	0.25	25
5.72665e-51	0.587126	0.727	0.579	1.34485e-46	Larp1	Ery	Two-sided Wilcoxon test	0.25	25
6.39561e-51	0.33735	0.429	0.24	1.50194e-46	Chek2	Ery	Two-sided Wilcoxon test	0.25	25
8.46573e-51	0.340018	0.486	0.295	1.98809e-46	Arid3a	Ery	Two-sided Wilcoxon test	0.25	25
1.90426e-49	0.432715	0.666	0.416	4.47197e-45	Kif11	Ery	Two-sided Wilcoxon test	0.25	25
2.1498e-49	0.492829	0.55	0.334	5.0486e-45	Cep128	Ery	Two-sided Wilcoxon test	0.25	25
2.65495e-49	0.329092	0.394	0.22	6.23488e-45	Stx2	Ery	Two-sided Wilcoxon test	0.25	25
8.21189e-49	0.625352	0.811	0.678	1.92848e-44	Herc1	Ery	Two-sided Wilcoxon test	0.25	25
9.66981e-48	0.435216	0.523	0.342	2.27086e-43	Ddhd1	Ery	Two-sided Wilcoxon test	0.25	25
3.46467e-47	0.250203	0.391	0.217	8.13643e-43	Cltb	Ery	Two-sided Wilcoxon test	0.25	25
1.74374e-45	0.405528	0.442	0.256	4.095e-41	Pik3cb	Ery	Two-sided Wilcoxon test	0.25	25
2.43409e-45	0.256737	0.33	0.168	5.71622e-41	Slc7a5	Ery	Two-sided Wilcoxon test	0.25	25
2.75399e-45	0.287927	0.446	0.271	6.46747e-41	Ogfrl1	Ery	Two-sided Wilcoxon test	0.25	25
5.01977e-45	0.266937	0.39	0.216	1.17884e-40	Hist1h2ab	Ery	Two-sided Wilcoxon test	0.25	25
1.64476e-44	0.41872	0.506	0.322	3.86256e-40	Ninl	Ery	Two-sided Wilcoxon test	0.25	25
[truncated: 11,983 more rows]

## Sheet: Fig5e
	Supplementary Data 3. Marker expression in different cardiac cell populations from control and Rnf20iEC-KO embryos.
p_val	avg_log2FC	pct.1	pct.2	p_val_adj	cluster	gene	CELL_TYPE	Test_used	fc.threshold (log2)	min.pct (%)
9.65868e-46	1.18575	0.849	0.483	2.26824e-41	0	Fgf13	vCM1	Two-sided Wilcoxon test	0.25	25
1.53188e-46	1.08724	0.869	0.502	3.59748e-42	0	Pde4b	vCM1	Two-sided Wilcoxon test	0.25	25
1.96819e-46	1.08547	0.711	0.325	4.62209e-42	0	Sorbs2os	vCM1	Two-sided Wilcoxon test	0.25	25
1.34649e-51	1.04645	0.983	0.657	3.1621e-47	0	Cacna1c	vCM1	Two-sided Wilcoxon test	0.25	25
1.20552e-37	1.02888	0.899	0.594	2.83105e-33	0	Mpped2	vCM1	Two-sided Wilcoxon test	0.25	25
2.32222e-50	0.975629	0.966	0.646	5.45349e-46	0	Rbm20	vCM1	Two-sided Wilcoxon test	0.25	25
1.13788e-44	0.961403	0.963	0.733	2.67219e-40	0	Pcdh7	vCM1	Two-sided Wilcoxon test	0.25	25
2.54586e-38	0.937879	0.879	0.565	5.9787e-34	0	Esrrg	vCM1	Two-sided Wilcoxon test	0.25	25
4.71099e-38	0.930035	0.913	0.662	1.10633e-33	0	Fhod3	vCM1	Two-sided Wilcoxon test	0.25	25
1.24642e-34	0.929788	0.661	0.329	2.92708e-30	0	4930512H18Rik	vCM1	Two-sided Wilcoxon test	0.25	25
3.35011e-46	0.920263	0.997	0.642	7.8674e-42	0	Cacnb2	vCM1	Two-sided Wilcoxon test	0.25	25
8.51873e-44	0.915725	0.946	0.61	2.00054e-39	0	Zfpm2	vCM1	Two-sided Wilcoxon test	0.25	25
1.73055e-37	0.911032	0.681	0.326	4.06403e-33	0	Prdm16	vCM1	Two-sided Wilcoxon test	0.25	25
1.45087e-51	0.890861	0.993	0.896	3.40721e-47	0	Ryr2	vCM1	Two-sided Wilcoxon test	0.25	25
1.51064e-27	0.890529	0.711	0.418	3.54759e-23	0	Adamts6	vCM1	Two-sided Wilcoxon test	0.25	25
2.75153e-34	0.879295	0.893	0.544	6.4617e-30	0	Kcnq1ot1	vCM1	Two-sided Wilcoxon test	0.25	25
1.75395e-29	0.865882	0.721	0.431	4.11897e-25	0	Tnni3k	vCM1	Two-sided Wilcoxon test	0.25	25
5.39238e-45	0.848036	0.983	0.879	1.26635e-40	0	Palld	vCM1	Two-sided Wilcoxon test	0.25	25
1.5278e-24	0.845542	0.789	0.561	3.58788e-20	0	Rabgap1l	vCM1	Two-sided Wilcoxon test	0.25	25
1.92119e-37	0.817425	0.953	0.791	4.51172e-33	0	Sorbs2	vCM1	Two-sided Wilcoxon test	0.25	25
7.61609e-27	0.817397	0.826	0.609	1.78856e-22	0	Kif26b	vCM1	Two-sided Wilcoxon test	0.25	25
6.59045e-28	0.803153	0.872	0.556	1.5477e-23	0	Kcnq5	vCM1	Two-sided Wilcoxon test	0.25	25
1.77775e-31	0.792949	0.789	0.491	4.17486e-27	0	Dpf3	vCM1	Two-sided Wilcoxon test	0.25	25
2.86449e-23	0.78792	0.748	0.502	6.72696e-19	0	Gm26917	vCM1	Two-sided Wilcoxon test	0.25	25
7.93157e-17	0.786204	0.443	0.228	1.86265e-12	0	Ntn1	vCM1	Two-sided Wilcoxon test	0.25	25
1.49094e-08	0.777214	0.406	0.26	0.000350132	0	Kcnd2	vCM1	Two-sided Wilcoxon test	0.25	25
9.67675e-27	0.772859	0.802	0.535	2.27249e-22	0	Cacna2d1	vCM1	Two-sided Wilcoxon test	0.25	25
3.74555e-23	0.767779	0.856	0.565	8.79605e-19	0	Arhgap6	vCM1	Two-sided Wilcoxon test	0.25	25
1.02543e-32	0.762328	0.99	0.689	2.40813e-28	0	Erbb4	vCM1	Two-sided Wilcoxon test	0.25	25
1.98496e-26	0.759234	0.909	0.689	4.66147e-22	0	Camk2d	vCM1	Two-sided Wilcoxon test	0.25	25
5.10305e-22	0.752009	0.664	0.421	1.1984e-17	0	Kcnn2	vCM1	Two-sided Wilcoxon test	0.25	25
1.74023e-31	0.746377	0.956	0.79	4.08676e-27	0	Cdh2	vCM1	Two-sided Wilcoxon test	0.25	25
1.79878e-28	0.746248	0.889	0.56	4.22425e-24	0	Pde4d	vCM1	Two-sided Wilcoxon test	0.25	25
1.28328e-12	0.739475	0.567	0.399	3.01365e-08	0	Lrrtm3	vCM1	Two-sided Wilcoxon test	0.25	25
7.09429e-17	0.730226	0.651	0.407	1.66602e-12	0	Kcnh7	vCM1	Two-sided Wilcoxon test	0.25	25
3.14935e-24	0.717068	0.943	0.659	7.39594e-20	0	Ctnna3	vCM1	Two-sided Wilcoxon test	0.25	25
1.39834e-15	0.712006	0.621	0.407	3.28386e-11	0	Cdh13	vCM1	Two-sided Wilcoxon test	0.25	25
4.7549e-26	0.704251	0.782	0.477	1.11664e-21	0	Sox6	vCM1	Two-sided Wilcoxon test	0.25	25
9.62177e-25	0.700667	0.963	0.908	2.25958e-20	0	mt-Nd4l	vCM1	Two-sided Wilcoxon test	0.25	25
3.82589e-08	0.698167	0.537	0.405	0.000898472	0	Angpt1	vCM1	Two-sided Wilcoxon test	0.25	25
9.14488e-17	0.69594	0.648	0.454	2.14758e-12	0	Sorbs1	vCM1	Two-sided Wilcoxon test	0.25	25
9.05197e-22	0.691316	0.728	0.493	2.12577e-17	0	Ror2	vCM1	Two-sided Wilcoxon test	0.25	25
4.43645e-24	0.690332	0.53	0.259	1.04186e-19	0	Gm13269	vCM1	Two-sided Wilcoxon test	0.25	25
2.78055e-18	0.686829	0.376	0.172	6.52985e-14	0	Fyb2	vCM1	Two-sided Wilcoxon test	0.25	25
6.53707e-28	0.679178	1	0.999	1.53516e-23	0	mt-Atp6	vCM1	Two-sided Wilcoxon test	0.25	25
3.37218e-11	0.673527	0.544	0.394	7.91922e-07	0	Lrch1	vCM1	Two-sided Wilcoxon test	0.25	25
5.26402e-20	0.671416	0.681	0.45	1.2362e-15	0	Akap6	vCM1	Two-sided Wilcoxon test	0.25	25
7.71461e-17	0.665343	0.534	0.322	1.8117e-12	0	Lrrc4	vCM1	Two-sided Wilcoxon test	0.25	25
5.87906e-18	0.65778	0.826	0.681	1.38064e-13	0	Stk39	vCM1	Two-sided Wilcoxon test	0.25	25
4.0111e-15	0.65721	0.641	0.438	9.41966e-11	0	Hmcn1	vCM1	Two-sided Wilcoxon test	0.25	25
7.78687e-20	0.655119	0.768	0.541	1.82867e-15	0	Iqsec1	vCM1	Two-sided Wilcoxon test	0.25	25
3.58494e-15	0.653592	0.497	0.303	8.41886e-11	0	Cpeb3	vCM1	Two-sided Wilcoxon test	0.25	25
1.28906e-13	0.649669	0.695	0.509	3.02724e-09	0	Alcam	vCM1	Two-sided Wilcoxon test	0.25	25
5.45806e-18	0.648985	0.366	0.171	1.28177e-13	0	Arhgef3	vCM1	Two-sided Wilcoxon test	0.25	25
6.07867e-12	0.644172	0.658	0.488	1.42751e-07	0	Nav2	vCM1	Two-sided Wilcoxon test	0.25	25
2.62065e-15	0.643385	0.705	0.511	6.15433e-11	0	Hdac9	vCM1	Two-sided Wilcoxon test	0.25	25
2.51047e-21	0.643181	0.805	0.594	5.89559e-17	0	Pde4dip	vCM1	Two-sided Wilcoxon test	0.25	25
2.05085e-23	0.639339	0.983	0.962	4.81621e-19	0	mt-Nd3	vCM1	Two-sided Wilcoxon test	0.25	25
1.54054e-14	0.638242	0.591	0.391	3.61781e-10	0	Prkd1	vCM1	Two-sided Wilcoxon test	0.25	25
6.04161e-16	0.633457	0.47	0.258	1.41881e-11	0	Tgfbr3	vCM1	Two-sided Wilcoxon test	0.25	25
1.20239e-11	0.626516	0.523	0.343	2.8237e-07	0	Ror1	vCM1	Two-sided Wilcoxon test	0.25	25
5.69361e-21	0.625184	0.691	0.455	1.33709e-16	0	Cog5	vCM1	Two-sided Wilcoxon test	0.25	25
2.01269e-25	0.622136	1	0.999	4.72661e-21	0	mt-Co2	vCM1	Two-sided Wilcoxon test	0.25	25
1.32261e-24	0.621291	0.99	0.99	3.10601e-20	0	mt-Nd4	vCM1	Two-sided Wilcoxon test	0.25	25
3.55502e-20	0.61881	0.872	0.758	8.3486e-16	0	mt-Atp8	vCM1	Two-sided Wilcoxon test	0.25	25
1.42027e-21	0.614203	0.903	0.719	3.33535e-17	0	Pakap	vCM1	Two-sided Wilcoxon test	0.25	25
7.41408e-14	0.606542	0.544	0.36	1.74112e-09	0	Map3k5	vCM1	Two-sided Wilcoxon test	0.25	25
3.22732e-15	0.603274	0.701	0.509	7.57903e-11	0	Tanc1	vCM1	Two-sided Wilcoxon test	0.25	25
8.88367e-21	0.601536	0.856	0.566	2.08624e-16	0	Sdk1	vCM1	Two-sided Wilcoxon test	0.25	25
1.85726e-23	0.595551	0.883	0.602	4.36158e-19	0	Pard3	vCM1	Two-sided Wilcoxon test	0.25	25
4.72178e-13	0.594818	0.51	0.332	1.10886e-08	0	Pdzd2	vCM1	Two-sided Wilcoxon test	0.25	25
8.76735e-26	0.59396	0.987	0.772	2.05892e-21	0	Airn	vCM1	Two-sided Wilcoxon test	0.25	25
5.52624e-17	0.591583	0.523	0.302	1.29778e-12	0	Abcc9	vCM1	Two-sided Wilcoxon test	0.25	25
3.28086e-24	0.591403	0.997	0.999	7.70476e-20	0	mt-Co3	vCM1	Two-sided Wilcoxon test	0.25	25
9.17844e-32	0.586841	1	0.972	2.15546e-27	0	Slc8a1	vCM1	Two-sided Wilcoxon test	0.25	25
8.86346e-16	0.586722	0.782	0.549	2.08149e-11	0	Ptprk	vCM1	Two-sided Wilcoxon test	0.25	25
7.2551e-20	0.581797	0.903	0.703	1.70379e-15	0	Lrrfip1	vCM1	Two-sided Wilcoxon test	0.25	25
1.71964e-15	0.581065	0.644	0.443	4.03841e-11	0	Pip5k1b	vCM1	Two-sided Wilcoxon test	0.25	25
6.85575e-24	0.578015	0.997	0.997	1.61001e-19	0	mt-Co1	vCM1	Two-sided Wilcoxon test	0.25	25
1.38059e-20	0.573453	0.876	0.569	3.24219e-16	0	Dmd	vCM1	Two-sided Wilcoxon test	0.25	25
1.31433e-11	0.571996	0.581	0.426	3.08658e-07	0	Psd3	vCM1	Two-sided Wilcoxon test	0.25	25
3.75018e-24	0.5704	0.966	0.832	8.80692e-20	0	Qk	vCM1	Two-sided Wilcoxon test	0.25	25
5.99466e-13	0.566415	0.634	0.477	1.40779e-08	0	Ehbp1	vCM1	Two-sided Wilcoxon test	0.25	25
1.44678e-12	0.565562	0.617	0.446	3.39763e-08	0	Slc25a13	vCM1	Two-sided Wilcoxon test	0.25	25
2.38939e-22	0.565417	0.977	0.947	5.61124e-18	0	mt-Nd5	vCM1	Two-sided Wilcoxon test	0.25	25
4.21921e-25	0.564475	0.96	0.643	9.90839e-21	0	Magi1	vCM1	Two-sided Wilcoxon test	0.25	25
4.19046e-15	0.560745	0.809	0.604	9.84087e-11	0	Meis1	vCM1	Two-sided Wilcoxon test	0.25	25
2.04236e-20	0.560204	0.909	0.667	4.79628e-16	0	Rere	vCM1	Two-sided Wilcoxon test	0.25	25
1.28053e-17	0.55828	0.829	0.614	3.0072e-13	0	Chd2	vCM1	Two-sided Wilcoxon test	0.25	25
4.6761e-17	0.558038	0.805	0.583	1.09813e-12	0	Magi3	vCM1	Two-sided Wilcoxon test	0.25	25
3.7656e-11	0.557326	0.393	0.226	8.84313e-07	0	Gm15261	vCM1	Two-sided Wilcoxon test	0.25	25
5.06418e-20	0.556516	0.876	0.652	1.18927e-15	0	Akap13	vCM1	Two-sided Wilcoxon test	0.25	25
7.40811e-15	0.553903	0.802	0.626	1.73972e-10	0	Chchd3	vCM1	Two-sided Wilcoxon test	0.25	25
1.82127e-12	0.546484	0.654	0.495	4.27708e-08	0	Dip2b	vCM1	Two-sided Wilcoxon test	0.25	25
4.95476e-22	0.544328	0.99	0.993	1.16357e-17	0	mt-Nd1	vCM1	Two-sided Wilcoxon test	0.25	25
7.8602e-13	0.543266	0.523	0.348	1.84589e-08	0	Lrba	vCM1	Two-sided Wilcoxon test	0.25	25
3.84291e-10	0.539721	0.527	0.386	9.02469e-06	0	P3h2	vCM1	Two-sided Wilcoxon test	0.25	25
2.79517e-13	0.539528	0.661	0.481	6.56419e-09	0	Plekha7	vCM1	Two-sided Wilcoxon test	0.25	25
2.91596e-19	0.534843	0.517	0.272	6.84785e-15	0	Gm10848	vCM1	Two-sided Wilcoxon test	0.25	25
9.61089e-17	0.534026	0.782	0.556	2.25702e-12	0	Fndc3b	vCM1	Two-sided Wilcoxon test	0.25	25
7.96107e-17	0.532627	0.779	0.541	1.86958e-12	0	Mlip	vCM1	Two-sided Wilcoxon test	0.25	25
9.52207e-14	0.532036	0.473	0.284	2.23616e-09	0	Gm47271	vCM1	Two-sided Wilcoxon test	0.25	25
2.75764e-20	0.528996	0.997	0.993	6.47603e-16	0	mt-Cytb	vCM1	Two-sided Wilcoxon test	0.25	25
0.0014713	0.526263	0.309	0.25	1	0	Taco1	vCM1	Two-sided Wilcoxon test	0.25	25
6.77695e-11	0.525925	0.567	0.412	1.5915e-06	0	Ank2	vCM1	Two-sided Wilcoxon test	0.25	25
5.99822e-14	0.525193	0.802	0.668	1.40862e-09	0	Tln2	vCM1	Two-sided Wilcoxon test	0.25	25
2.34182e-11	0.525057	0.389	0.24	5.49952e-07	0	Focad	vCM1	Two-sided Wilcoxon test	0.25	25
1.18719e-15	0.525002	0.826	0.627	2.788e-11	0	Mtss1	vCM1	Two-sided Wilcoxon test	0.25	25
6.84625e-21	0.522733	1	0.993	1.60777e-16	0	mt-Nd2	vCM1	Two-sided Wilcoxon test	0.25	25
8.87898e-15	0.521841	0.792	0.586	2.08514e-10	0	Ppp1r12b	vCM1	Two-sided Wilcoxon test	0.25	25
2.4651e-17	0.519986	0.745	0.524	5.78905e-13	0	Zfp521	vCM1	Two-sided Wilcoxon test	0.25	25
3.5773e-11	0.513838	0.346	0.199	8.40092e-07	0	Kcnq1	vCM1	Two-sided Wilcoxon test	0.25	25
2.28261e-17	0.511265	0.826	0.645	5.36049e-13	0	Gphn	vCM1	Two-sided Wilcoxon test	0.25	25
4.09002e-12	0.510348	0.604	0.445	9.605e-08	0	Foxj3	vCM1	Two-sided Wilcoxon test	0.25	25
1.29052e-14	0.505839	0.909	0.789	3.03066e-10	0	Pdlim5	vCM1	Two-sided Wilcoxon test	0.25	25
3.31782e-11	0.504643	0.487	0.347	7.79156e-07	0	Camk2a	vCM1	Two-sided Wilcoxon test	0.25	25
2.85423e-07	0.503414	0.44	0.327	0.00670287	0	Gramd1b	vCM1	Two-sided Wilcoxon test	0.25	25
1.98522e-13	0.503115	0.584	0.405	4.6621e-09	0	Ptpn4	vCM1	Two-sided Wilcoxon test	0.25	25
1.48094e-10	0.502477	0.742	0.612	3.47785e-06	0	Kif13a	vCM1	Two-sided Wilcoxon test	0.25	25
1.42391e-11	0.501823	0.624	0.483	3.34391e-07	0	Lrrfip2	vCM1	Two-sided Wilcoxon test	0.25	25
2.55566e-11	0.50162	0.581	0.415	6.00172e-07	0	Abtb2	vCM1	Two-sided Wilcoxon test	0.25	25
6.58234e-12	0.499275	0.614	0.431	1.5458e-07	0	Nhsl2	vCM1	Two-sided Wilcoxon test	0.25	25
1.21581e-08	0.494809	0.466	0.329	0.00028552	0	Lrmda	vCM1	Two-sided Wilcoxon test	0.25	25
2.22101e-15	0.494495	0.762	0.561	5.21583e-11	0	Strbp	vCM1	Two-sided Wilcoxon test	0.25	25
1.54542e-15	0.488046	0.792	0.591	3.62928e-11	0	Chd7	vCM1	Two-sided Wilcoxon test	0.25	25
1.9987e-14	0.480824	0.852	0.601	4.69375e-10	0	Tcf12	vCM1	Two-sided Wilcoxon test	0.25	25
2.06089e-13	0.479039	0.755	0.574	4.83979e-09	0	Mllt10	vCM1	Two-sided Wilcoxon test	0.25	25
7.75886e-16	0.476226	0.896	0.642	1.82209e-11	0	Samd4	vCM1	Two-sided Wilcoxon test	0.25	25
4.26384e-12	0.475705	0.721	0.514	1.00132e-07	0	Pdzrn3	vCM1	Two-sided Wilcoxon test	0.25	25
1.76683e-09	0.474385	0.584	0.472	4.14922e-05	0	Lgr4	vCM1	Two-sided Wilcoxon test	0.25	25
5.82423e-13	0.474034	0.674	0.479	1.36776e-08	0	Zfp407	vCM1	Two-sided Wilcoxon test	0.25	25
1.89938e-15	0.473454	0.879	0.71	4.4605e-11	0	Adk	vCM1	Two-sided Wilcoxon test	0.25	25
1.94534e-08	0.471252	0.349	0.232	0.000456844	0	Eml5	vCM1	Two-sided Wilcoxon test	0.25	25
3.34851e-11	0.46943	0.366	0.2	7.86363e-07	0	Frem1	vCM1	Two-sided Wilcoxon test	0.25	25
1.40484e-09	0.469394	0.319	0.181	3.29913e-05	0	Sobp	vCM1	Two-sided Wilcoxon test	0.25	25
7.55305e-09	0.468336	0.359	0.22	0.000177376	0	Gm36975	vCM1	Two-sided Wilcoxon test	0.25	25
1.06708e-07	0.468143	0.607	0.495	0.00250593	0	Osbpl8	vCM1	Two-sided Wilcoxon test	0.25	25
6.97952e-12	0.467906	0.923	0.701	1.63907e-07	0	Msi2	vCM1	Two-sided Wilcoxon test	0.25	25
1.26878e-08	0.466148	0.527	0.389	0.00029796	0	Myo5a	vCM1	Two-sided Wilcoxon test	0.25	25
4.02865e-13	0.46533	0.57	0.379	9.46088e-09	0	5330438D12Rik	vCM1	Two-sided Wilcoxon test	0.25	25
2.22137e-12	0.464458	0.715	0.532	5.21666e-08	0	Sipa1l1	vCM1	Two-sided Wilcoxon test	0.25	25
1.99466e-08	0.46384	0.735	0.624	0.000468425	0	Trdn	vCM1	Two-sided Wilcoxon test	0.25	25
1.11856e-06	0.46314	0.466	0.36	0.0262683	0	Rcan2	vCM1	Two-sided Wilcoxon test	0.25	25
3.62792e-11	0.462053	0.664	0.488	8.51981e-07	0	Cdkal1	vCM1	Two-sided Wilcoxon test	0.25	25
6.77604e-10	0.461143	0.581	0.452	1.59128e-05	0	Gab1	vCM1	Two-sided Wilcoxon test	0.25	25
1.10161e-10	0.460122	0.597	0.425	2.58701e-06	0	Aff2	vCM1	Two-sided Wilcoxon test	0.25	25
3.42873e-12	0.459343	0.846	0.73	8.05203e-08	0	Clasp1	vCM1	Two-sided Wilcoxon test	0.25	25
3.81316e-10	0.454649	0.638	0.5	8.95482e-06	0	Inpp5a	vCM1	Two-sided Wilcoxon test	0.25	25
2.5767e-11	0.451285	0.446	0.279	6.05112e-07	0	Gm16599	vCM1	Two-sided Wilcoxon test	0.25	25
1.44427e-12	0.449719	0.638	0.475	3.39172e-08	0	Zfp827	vCM1	Two-sided Wilcoxon test	0.25	25
7.07887e-12	0.447411	0.685	0.493	1.6624e-07	0	Ncoa2	vCM1	Two-sided Wilcoxon test	0.25	25
1.84236e-12	0.447347	0.701	0.505	4.3266e-08	0	Mcc	vCM1	Two-sided Wilcoxon test	0.25	25
2.11413e-08	0.445965	0.57	0.445	0.000496482	0	Cblb	vCM1	Two-sided Wilcoxon test	0.25	25
3.592e-11	0.444549	0.275	0.131	8.43545e-07	0	Gm20631	vCM1	Two-sided Wilcoxon test	0.25	25
1.47255e-12	0.442384	0.708	0.515	3.45814e-08	0	Rasal2	vCM1	Two-sided Wilcoxon test	0.25	25
6.00711e-09	0.441528	0.5	0.366	0.000141071	0	Snx24	vCM1	Two-sided Wilcoxon test	0.25	25
6.00531e-07	0.441424	0.389	0.291	0.0141029	0	Vwa8	vCM1	Two-sided Wilcoxon test	0.25	25
1.24925e-09	0.437231	0.711	0.562	2.93373e-05	0	Ascc3	vCM1	Two-sided Wilcoxon test	0.25	25
4.39039e-07	0.436765	0.497	0.385	0.0103104	0	Ankrd28	vCM1	Two-sided Wilcoxon test	0.25	25
2.87571e-11	0.436618	0.779	0.56	6.75331e-07	0	Asap1	vCM1	Two-sided Wilcoxon test	0.25	25
3.7191e-12	0.436437	0.641	0.458	8.73394e-08	0	Phlpp1	vCM1	Two-sided Wilcoxon test	0.25	25
4.12937e-09	0.43504	0.581	0.446	9.69741e-05	0	St7	vCM1	Two-sided Wilcoxon test	0.25	25
1.153e-06	0.434658	0.537	0.436	0.027077	0	Babam2	vCM1	Two-sided Wilcoxon test	0.25	25
2.23712e-16	0.43425	0.668	0.449	5.25364e-12	0	Gm26632	vCM1	Two-sided Wilcoxon test	0.25	25
2.61911e-10	0.433648	0.624	0.424	6.15072e-06	0	Adgrl3	vCM1	Two-sided Wilcoxon test	0.25	25
2.99244e-07	0.430973	0.393	0.277	0.00702744	0	Cobll1	vCM1	Two-sided Wilcoxon test	0.25	25
3.30227e-14	0.429926	0.668	0.438	7.75504e-10	0	Ptprg	vCM1	Two-sided Wilcoxon test	0.25	25
0.00174204	0.429033	0.302	0.239	1	0	Pdgfd	vCM1	Two-sided Wilcoxon test	0.25	25
6.48864e-12	0.428235	0.775	0.624	1.52379e-07	0	Jph2	vCM1	Two-sided Wilcoxon test	0.25	25
1.1488e-12	0.426236	0.789	0.574	2.69783e-08	0	Sbf2	vCM1	Two-sided Wilcoxon test	0.25	25
4.09174e-11	0.425192	0.738	0.551	9.60904e-07	0	Ptbp2	vCM1	Two-sided Wilcoxon test	0.25	25
5.15784e-09	0.423908	0.554	0.414	0.000121127	0	Mnat1	vCM1	Two-sided Wilcoxon test	0.25	25
4.3083e-09	0.421873	0.312	0.181	0.000101176	0	Gm15614	vCM1	Two-sided Wilcoxon test	0.25	25
5.09266e-08	0.420864	0.601	0.483	0.00119596	0	4930402H24Rik	vCM1	Two-sided Wilcoxon test	0.25	25
2.21482e-07	0.416641	0.416	0.297	0.00520129	0	Gm15283	vCM1	Two-sided Wilcoxon test	0.25	25
1.13483e-05	0.416489	0.477	0.39	0.266504	0	Rgl1	vCM1	Two-sided Wilcoxon test	0.25	25
1.38581e-09	0.416059	0.678	0.532	3.25443e-05	0	Casz1	vCM1	Two-sided Wilcoxon test	0.25	25
3.27798e-11	0.415953	0.695	0.487	7.698e-07	0	Tmem108	vCM1	Two-sided Wilcoxon test	0.25	25
3.54596e-07	0.41586	0.654	0.533	0.00832733	0	Nrp1	vCM1	Two-sided Wilcoxon test	0.25	25
1.68721e-07	0.410759	0.547	0.434	0.00396223	0	Antxr2	vCM1	Two-sided Wilcoxon test	0.25	25
9.65509e-09	0.409567	0.715	0.543	0.00022674	0	Prkce	vCM1	Two-sided Wilcoxon test	0.25	25
2.27435e-06	0.409539	0.513	0.399	0.0534109	0	Pola1	vCM1	Two-sided Wilcoxon test	0.25	25
3.94813e-05	0.409205	0.386	0.3	0.92718	0	Grk5	vCM1	Two-sided Wilcoxon test	0.25	25
4.5196e-06	0.408272	0.584	0.507	0.106138	0	Slmap	vCM1	Two-sided Wilcoxon test	0.25	25
9.06813e-11	0.407138	0.678	0.472	2.12956e-06	0	Arl15	vCM1	Two-sided Wilcoxon test	0.25	25
5.57887e-07	0.406503	0.594	0.471	0.0131014	0	Sgms1	vCM1	Two-sided Wilcoxon test	0.25	25
1.32459e-05	0.406459	0.326	0.228	0.311067	0	Sntb1	vCM1	Two-sided Wilcoxon test	0.25	25
7.18018e-12	0.406385	0.664	0.472	1.68619e-07	0	Zcchc7	vCM1	Two-sided Wilcoxon test	0.25	25
6.59868e-12	0.405138	0.842	0.656	1.54963e-07	0	Ankrd17	vCM1	Two-sided Wilcoxon test	0.25	25
1.34939e-10	0.404199	0.534	0.364	3.16892e-06	0	Znrf3	vCM1	Two-sided Wilcoxon test	0.25	25
2.13386e-07	0.403448	0.252	0.142	0.00501115	0	Myo16	vCM1	Two-sided Wilcoxon test	0.25	25
1.1488e-05	0.403289	0.611	0.543	0.269785	0	Phactr2	vCM1	Two-sided Wilcoxon test	0.25	25
9.43082e-12	0.402464	0.755	0.563	2.21473e-07	0	Jmjd1c	vCM1	Two-sided Wilcoxon test	0.25	25
1.16374e-06	0.400651	0.537	0.43	0.0273294	0	Dnajc1	vCM1	Two-sided Wilcoxon test	0.25	25
4.44768e-06	0.399157	0.312	0.215	0.104449	0	Lin28b	vCM1	Two-sided Wilcoxon test	0.25	25
6.97614e-08	0.398903	0.574	0.435	0.00163828	0	Kdm6a	vCM1	Two-sided Wilcoxon test	0.25	25
4.2413e-09	0.397503	0.45	0.314	9.96026e-05	0	Ppargc1b	vCM1	Two-sided Wilcoxon test	0.25	25
5.26393e-09	0.396261	0.681	0.518	0.000123618	0	Pkp4	vCM1	Two-sided Wilcoxon test	0.25	25
1.69814e-09	0.396004	0.54	0.404	3.98792e-05	0	Tmem135	vCM1	Two-sided Wilcoxon test	0.25	25
3.74266e-08	0.394093	0.567	0.435	0.000878926	0	Rassf8	vCM1	Two-sided Wilcoxon test	0.25	25
3.25173e-10	0.394028	0.765	0.558	7.63635e-06	0	Setbp1	vCM1	Two-sided Wilcoxon test	0.25	25
1.56719e-10	0.392195	0.789	0.668	3.6804e-06	0	Utrn	vCM1	Two-sided Wilcoxon test	0.25	25
5.74531e-10	0.391657	0.698	0.514	1.34923e-05	0	Akt3	vCM1	Two-sided Wilcoxon test	0.25	25
0.000155338	0.390617	0.336	0.26	1	0	Elf4	vCM1	Two-sided Wilcoxon test	0.25	25
3.42302e-08	0.389811	0.594	0.465	0.000803862	0	Rptor	vCM1	Two-sided Wilcoxon test	0.25	25
7.79413e-07	0.389503	0.409	0.287	0.0183037	0	Retreg1	vCM1	Two-sided Wilcoxon test	0.25	25
0.00083306	0.388862	0.399	0.325	1	0	Unc13c	vCM1	Two-sided Wilcoxon test	0.25	25
1.36069e-10	0.388491	0.624	0.43	3.19545e-06	0	Maml3	vCM1	Two-sided Wilcoxon test	0.25	25
5.85849e-11	0.381872	0.631	0.435	1.37581e-06	0	Dennd1a	vCM1	Two-sided Wilcoxon test	0.25	25
2.11992e-10	0.380409	0.624	0.465	4.97842e-06	0	Mitf	vCM1	Two-sided Wilcoxon test	0.25	25
8.63953e-12	0.380221	0.695	0.509	2.02891e-07	0	Mbd5	vCM1	Two-sided Wilcoxon test	0.25	25
5.52228e-06	0.379928	0.537	0.464	0.129685	0	Helz	vCM1	Two-sided Wilcoxon test	0.25	25
9.98956e-07	0.379685	0.503	0.403	0.0234595	0	Vps13d	vCM1	Two-sided Wilcoxon test	0.25	25
1.79477e-11	0.379441	0.708	0.533	4.21484e-07	0	Dip2c	vCM1	Two-sided Wilcoxon test	0.25	25
1.29945e-13	0.378794	0.936	0.721	3.05163e-09	0	Ank3	vCM1	Two-sided Wilcoxon test	0.25	25
1.4565e-08	0.378372	0.644	0.49	0.000342045	0	Scmh1	vCM1	Two-sided Wilcoxon test	0.25	25
2.10286e-09	0.376401	0.765	0.611	4.93835e-05	0	Ubr5	vCM1	Two-sided Wilcoxon test	0.25	25
1.08058e-08	0.375508	0.601	0.457	0.000253764	0	Usp3	vCM1	Two-sided Wilcoxon test	0.25	25
2.0287e-10	0.374866	0.758	0.593	4.7642e-06	0	Arhgap31	vCM1	Two-sided Wilcoxon test	0.25	25
6.7174e-08	0.374714	0.601	0.447	0.00157751	0	Tbc1d5	vCM1	Two-sided Wilcoxon test	0.25	25
1.24742e-06	0.374627	0.473	0.367	0.0292944	0	Arhgap26	vCM1	Two-sided Wilcoxon test	0.25	25
1.87404e-11	0.372998	0.883	0.744	4.40099e-07	0	Tead1	vCM1	Two-sided Wilcoxon test	0.25	25
9.99687e-08	0.371589	0.56	0.428	0.00234767	0	Rapgef2	vCM1	Two-sided Wilcoxon test	0.25	25
2.72625e-09	0.369244	0.705	0.549	6.40231e-05	0	Myocd	vCM1	Two-sided Wilcoxon test	0.25	25
7.4232e-07	0.369147	0.607	0.472	0.0174326	0	Ghr	vCM1	Two-sided Wilcoxon test	0.25	25
3.16048e-10	0.368605	0.641	0.464	7.42207e-06	0	Fto	vCM1	Two-sided Wilcoxon test	0.25	25
6.13098e-06	0.368157	0.604	0.497	0.14398	0	Brwd1	vCM1	Two-sided Wilcoxon test	0.25	25
2.6841e-05	0.367618	0.386	0.304	0.630334	0	Kif16b	vCM1	Two-sided Wilcoxon test	0.25	25
5.5881e-12	0.367293	0.819	0.587	1.31231e-07	0	Atxn1	vCM1	Two-sided Wilcoxon test	0.25	25
1.01384e-05	0.367273	0.517	0.422	0.238089	0	Stox2	vCM1	Two-sided Wilcoxon test	0.25	25
3.18906e-05	0.367213	0.621	0.522	0.748919	0	Ppp1r9a	vCM1	Two-sided Wilcoxon test	0.25	25
1.27623e-07	0.36467	0.668	0.545	0.0029971	0	Trpm7	vCM1	Two-sided Wilcoxon test	0.25	25
5.83789e-05	0.362353	0.5	0.417	1	0	C430049B03Rik	vCM1	Two-sided Wilcoxon test	0.25	25
8.97981e-09	0.361285	0.685	0.562	0.000210882	0	Prkaa2	vCM1	Two-sided Wilcoxon test	0.25	25
1.75335e-09	0.361208	0.591	0.437	4.11758e-05	0	Fgfr2	vCM1	Two-sided Wilcoxon test	0.25	25
0.000203907	0.359378	0.53	0.476	1	0	1700025G04Rik	vCM1	Two-sided Wilcoxon test	0.25	25
4.91677e-09	0.359285	0.705	0.54	0.000115466	0	Neo1	vCM1	Two-sided Wilcoxon test	0.25	25
3.7185e-09	0.358558	0.732	0.546	8.73252e-05	0	Kansl1	vCM1	Two-sided Wilcoxon test	0.25	25
2.7054e-05	0.357737	0.56	0.472	0.635335	0	Gbf1	vCM1	Two-sided Wilcoxon test	0.25	25
8.45443e-09	0.357684	0.668	0.547	0.000198544	0	Ecpas	vCM1	Two-sided Wilcoxon test	0.25	25
3.84596e-06	0.356538	0.493	0.385	0.0903186	0	Gm4258	vCM1	Two-sided Wilcoxon test	0.25	25
1.95111e-05	0.353764	0.547	0.454	0.458198	0	Fars2	vCM1	Two-sided Wilcoxon test	0.25	25
0.00299301	0.353456	0.322	0.27	1	0	Ranbp17	vCM1	Two-sided Wilcoxon test	0.25	25
0.000801421	0.353355	0.584	0.528	1	0	Tsc22d2	vCM1	Two-sided Wilcoxon test	0.25	25
2.39554e-10	0.353345	0.886	0.693	5.62568e-06	0	Igf1r	vCM1	Two-sided Wilcoxon test	0.25	25
1.95475e-08	0.352462	0.762	0.61	0.000459053	0	Baz2b	vCM1	Two-sided Wilcoxon test	0.25	25
0.000283355	0.351393	0.5	0.428	1	0	Slco3a1	vCM1	Two-sided Wilcoxon test	0.25	25
7.32407e-07	0.350439	0.614	0.48	0.0171999	0	Msrb3	vCM1	Two-sided Wilcoxon test	0.25	25
1.0798e-07	0.349457	0.604	0.472	0.0025358	0	Oxr1	vCM1	Two-sided Wilcoxon test	0.25	25
8.10922e-08	0.348322	0.701	0.531	0.00190437	0	Etv6	vCM1	Two-sided Wilcoxon test	0.25	25
7.76632e-08	0.34751	0.544	0.411	0.00182384	0	Rfx3	vCM1	Two-sided Wilcoxon test	0.25	25
5.36627e-07	0.347011	0.628	0.493	0.0126022	0	Btbd9	vCM1	Two-sided Wilcoxon test	0.25	25
1.64385e-05	0.346312	0.718	0.638	0.386041	0	Daam1	vCM1	Two-sided Wilcoxon test	0.25	25
1.04795e-06	0.345433	0.701	0.564	0.02461	0	Mllt3	vCM1	Two-sided Wilcoxon test	0.25	25
3.48549e-06	0.345372	0.748	0.601	0.0818531	0	Foxn3	vCM1	Two-sided Wilcoxon test	0.25	25
2.53161e-12	0.34507	0.879	0.619	5.94523e-08	0	Mast4	vCM1	Two-sided Wilcoxon test	0.25	25
2.37226e-06	0.344286	0.403	0.297	0.0557102	0	Larp1b	vCM1	Two-sided Wilcoxon test	0.25	25
5.06446e-05	0.343821	0.628	0.525	1	0	Ralgapa1	vCM1	Two-sided Wilcoxon test	0.25	25
0.00049612	0.343668	0.419	0.355	1	0	Clock	vCM1	Two-sided Wilcoxon test	0.25	25
0.00663622	0.342696	0.349	0.314	1	0	Yes1	vCM1	Two-sided Wilcoxon test	0.25	25
0.00405657	0.342325	0.332	0.288	1	0	Rmdn1	vCM1	Two-sided Wilcoxon test	0.25	25
1.0111e-05	0.34159	0.537	0.445	0.237446	0	Kidins220	vCM1	Two-sided Wilcoxon test	0.25	25
4.19382e-05	0.341412	0.503	0.427	0.984876	0	Acaca	vCM1	Two-sided Wilcoxon test	0.25	25
0.000440552	0.341053	0.342	0.274	1	0	Sil1	vCM1	Two-sided Wilcoxon test	0.25	25
1.04154e-05	0.340459	0.601	0.5	0.244596	0	Usp15	vCM1	Two-sided Wilcoxon test	0.25	25
2.89174e-05	0.340414	0.523	0.447	0.679096	0	Asxl2	vCM1	Two-sided Wilcoxon test	0.25	25
2.50986e-07	0.340019	0.742	0.632	0.00589415	0	Ppp2r3a	vCM1	Two-sided Wilcoxon test	0.25	25
5.5276e-08	0.339735	0.832	0.735	0.0012981	0	Wnk1	vCM1	Two-sided Wilcoxon test	0.25	25
1.03493e-07	0.339699	0.695	0.537	0.00243042	0	Dlg1	vCM1	Two-sided Wilcoxon test	0.25	25
0.000848997	0.338859	0.379	0.33	1	0	Kdm4c	vCM1	Two-sided Wilcoxon test	0.25	25
1.24785e-06	0.338708	0.691	0.555	0.0293044	0	Rev3l	vCM1	Two-sided Wilcoxon test	0.25	25
3.08885e-06	0.338391	0.487	0.386	0.0725386	0	Btrc	vCM1	Two-sided Wilcoxon test	0.25	25
6.13279e-12	0.337773	0.809	0.615	1.44022e-07	0	Mbnl2	vCM1	Two-sided Wilcoxon test	0.25	25
4.2489e-13	0.33755	0.809	0.529	9.97811e-09	0	Grip1	vCM1	Two-sided Wilcoxon test	0.25	25
1.60466e-11	0.335995	0.728	0.495	3.76839e-07	0	Arid1b	vCM1	Two-sided Wilcoxon test	0.25	25
1.77151e-06	0.335189	0.329	0.217	0.0416022	0	Gm49959	vCM1	Two-sided Wilcoxon test	0.25	25
3.90707e-08	0.335028	0.718	0.569	0.000917537	0	Kmt2c	vCM1	Two-sided Wilcoxon test	0.25	25
1.18578e-05	0.332939	0.319	0.219	0.278468	0	Itpr2	vCM1	Two-sided Wilcoxon test	0.25	25
6.32911e-10	0.33272	0.832	0.643	1.48633e-05	0	Enah	vCM1	Two-sided Wilcoxon test	0.25	25
3.25111e-07	0.332079	0.789	0.628	0.00763491	0	Tbl1x	vCM1	Two-sided Wilcoxon test	0.25	25
5.29931e-08	0.331695	0.869	0.706	0.00124449	0	Fbn2	vCM1	Two-sided Wilcoxon test	0.25	25
5.55128e-06	0.331656	0.527	0.416	0.130366	0	Rictor	vCM1	Two-sided Wilcoxon test	0.25	25
1.70337e-07	0.331283	0.735	0.586	0.00400019	0	Gata4	vCM1	Two-sided Wilcoxon test	0.25	25
4.68813e-09	0.330778	0.718	0.569	0.000110096	0	Mical3	vCM1	Two-sided Wilcoxon test	0.25	25
3.25839e-05	0.330604	0.57	0.49	0.765199	0	Ssh2	vCM1	Two-sided Wilcoxon test	0.25	25
1.14078e-08	0.33034	0.688	0.519	0.000267902	0	Tcf4	vCM1	Two-sided Wilcoxon test	0.25	25
1.89563e-06	0.330204	0.587	0.468	0.044517	0	Vps13b	vCM1	Two-sided Wilcoxon test	0.25	25
3.89908e-06	0.330039	0.416	0.319	0.0915659	0	Ttll5	vCM1	Two-sided Wilcoxon test	0.25	25
3.92638e-07	0.329895	0.644	0.501	0.00922072	0	Pard3b	vCM1	Two-sided Wilcoxon test	0.25	25
2.2432e-10	0.329605	0.842	0.592	5.26792e-06	0	Ext1	vCM1	Two-sided Wilcoxon test	0.25	25
2.87609e-05	0.329102	0.339	0.251	0.675422	0	Atp11a	vCM1	Two-sided Wilcoxon test	0.25	25
3.03656e-05	0.32884	0.503	0.413	0.713106	0	Fign	vCM1	Two-sided Wilcoxon test	0.25	25
9.63087e-08	0.328563	0.446	0.311	0.00226171	0	Gm37240	vCM1	Two-sided Wilcoxon test	0.25	25
0.000118066	0.327217	0.366	0.295	1	0	Ppip5k2	vCM1	Two-sided Wilcoxon test	0.25	25
7.9597e-07	0.326924	0.537	0.426	0.0186926	0	Dennd1b	vCM1	Two-sided Wilcoxon test	0.25	25
7.5007e-07	0.326281	0.372	0.262	0.0176146	0	Cux2	vCM1	Two-sided Wilcoxon test	0.25	25
1.30185e-08	0.325759	0.601	0.466	0.000305726	0	Pcnx	vCM1	Two-sided Wilcoxon test	0.25	25
1.70546e-06	0.324153	0.601	0.449	0.0400509	0	Wwox	vCM1	Two-sided Wilcoxon test	0.25	25
1.05243e-09	0.324105	0.661	0.488	2.47153e-05	0	Prkca	vCM1	Two-sided Wilcoxon test	0.25	25
1.97245e-05	0.323417	0.517	0.431	0.463211	0	Zmynd8	vCM1	Two-sided Wilcoxon test	0.25	25
4.44561e-08	0.323364	0.638	0.486	0.00104401	0	Smg6	vCM1	Two-sided Wilcoxon test	0.25	25
3.7363e-06	0.323238	0.611	0.513	0.0877432	0	Nav1	vCM1	Two-sided Wilcoxon test	0.25	25
0.000773117	0.322162	0.581	0.498	1	0	Tcf7l2	vCM1	Two-sided Wilcoxon test	0.25	25
0.00791902	0.319916	0.359	0.32	1	0	Grb14	vCM1	Two-sided Wilcoxon test	0.25	25
3.34448e-05	0.318608	0.356	0.258	0.785417	0	Prkn	vCM1	Two-sided Wilcoxon test	0.25	25
2.65306e-12	0.318501	0.826	0.607	6.23045e-08	0	Exoc4	vCM1	Two-sided Wilcoxon test	0.25	25
0.000260092	0.31836	0.738	0.637	1	0	Cap2	vCM1	Two-sided Wilcoxon test	0.25	25
5.25817e-05	0.317889	0.419	0.345	1	0	Ttc19	vCM1	Two-sided Wilcoxon test	0.25	25
1.32731e-05	0.317727	0.49	0.393	0.311705	0	Tbc1d4	vCM1	Two-sided Wilcoxon test	0.25	25
1.92621e-07	0.317099	0.718	0.585	0.00452352	0	Snd1	vCM1	Two-sided Wilcoxon test	0.25	25
4.98756e-07	0.316462	0.584	0.468	0.0117128	0	Tmem245	vCM1	Two-sided Wilcoxon test	0.25	25
2.21194e-06	0.315779	0.466	0.37	0.0519452	0	Chd9	vCM1	Two-sided Wilcoxon test	0.25	25
3.62576e-06	0.31577	0.547	0.454	0.0851473	0	Atp9b	vCM1	Two-sided Wilcoxon test	0.25	25
2.14143e-05	0.31565	0.54	0.44	0.502893	0	Rfx7	vCM1	Two-sided Wilcoxon test	0.25	25
1.92811e-05	0.315617	0.473	0.396	0.452798	0	Vps13c	vCM1	Two-sided Wilcoxon test	0.25	25
0.000703464	0.315593	0.336	0.269	1	0	Hdac8	vCM1	Two-sided Wilcoxon test	0.25	25
0.00107601	0.315256	0.359	0.299	1	0	Pcca	vCM1	Two-sided Wilcoxon test	0.25	25
7.30201e-05	0.314391	0.47	0.375	1	0	Smyd3	vCM1	Two-sided Wilcoxon test	0.25	25
1.17361e-05	0.314055	0.46	0.356	0.275611	0	Arhgap32	vCM1	Two-sided Wilcoxon test	0.25	25
1.57722e-08	0.314051	0.648	0.488	0.000370394	0	Ube2e2	vCM1	Two-sided Wilcoxon test	0.25	25
0.000433422	0.314035	0.319	0.25	1	0	Garem1	vCM1	Two-sided Wilcoxon test	0.25	25
0.000704511	0.313379	0.47	0.414	1	0	Cdyl	vCM1	Two-sided Wilcoxon test	0.25	25
6.57916e-07	0.312719	0.315	0.199	0.0154505	0	Gm20275	vCM1	Two-sided Wilcoxon test	0.25	25
1.91778e-05	0.312479	0.376	0.272	0.450372	0	Scn5a	vCM1	Two-sided Wilcoxon test	0.25	25
1.05794e-06	0.312129	0.534	0.411	0.0248447	0	Ralgapa2	vCM1	Two-sided Wilcoxon test	0.25	25
4.14853e-07	0.312017	0.883	0.767	0.00974242	0	Pakap.1	vCM1	Two-sided Wilcoxon test	0.25	25
0.00022113	0.311651	0.322	0.255	1	0	Pitpnm2	vCM1	Two-sided Wilcoxon test	0.25	25
8.46953e-06	0.311246	0.319	0.214	0.198898	0	Sorcs2	vCM1	Two-sided Wilcoxon test	0.25	25
2.25658e-05	0.309837	0.426	0.341	0.529935	0	Snx13	vCM1	Two-sided Wilcoxon test	0.25	25
1.71588e-10	0.309467	0.852	0.657	4.02958e-06	0	Nfib	vCM1	Two-sided Wilcoxon test	0.25	25
0.000627248	0.309279	0.356	0.291	1	0	Msh3	vCM1	Two-sided Wilcoxon test	0.25	25
1.38893e-07	0.309267	0.886	0.859	0.00326177	0	Hba-a2	vCM1	Two-sided Wilcoxon test	0.25	25
7.96837e-05	0.308616	0.473	0.389	1	0	Hivep2	vCM1	Two-sided Wilcoxon test	0.25	25
1.14555e-06	0.308358	0.567	0.448	0.0269021	0	Cpq	vCM1	Two-sided Wilcoxon test	0.25	25
1.52311e-05	0.308146	0.591	0.477	0.357688	0	Scaf8	vCM1	Two-sided Wilcoxon test	0.25	25
4.09963e-05	0.307826	0.815	0.676	0.962756	0	Strn3	vCM1	Two-sided Wilcoxon test	0.25	25
7.66756e-07	0.307284	0.547	0.423	0.0180065	0	Pan3	vCM1	Two-sided Wilcoxon test	0.25	25
1.14743e-09	0.306574	0.98	0.929	2.69462e-05	0	Igf2r	vCM1	Two-sided Wilcoxon test	0.25	25
3.0369e-07	0.306279	0.534	0.415	0.00713186	0	Mboat2	vCM1	Two-sided Wilcoxon test	0.25	25
3.16917e-06	0.305769	0.594	0.476	0.0744248	0	Zfp280d	vCM1	Two-sided Wilcoxon test	0.25	25
1.9852e-07	0.304574	0.705	0.573	0.00466205	0	Mycbp2	vCM1	Two-sided Wilcoxon test	0.25	25
0.00416395	0.304163	0.386	0.329	1	0	Immp2l	vCM1	Two-sided Wilcoxon test	0.25	25
1.90573e-05	0.303947	0.507	0.416	0.447543	0	Insr	vCM1	Two-sided Wilcoxon test	0.25	25
0.000326966	0.303582	0.483	0.413	1	0	Hunk	vCM1	Two-sided Wilcoxon test	0.25	25
7.59583e-07	0.303382	0.5	0.384	0.0178381	0	Prtg	vCM1	Two-sided Wilcoxon test	0.25	25
1.55104e-07	0.302964	0.758	0.599	0.00364245	0	Nipbl	vCM1	Two-sided Wilcoxon test	0.25	25
0.00761898	0.302251	0.366	0.321	1	0	Dym	vCM1	Two-sided Wilcoxon test	0.25	25
0.00021898	0.301088	0.403	0.327	1	0	Nr6a1	vCM1	Two-sided Wilcoxon test	0.25	25
0.000792306	0.30034	0.51	0.454	1	0	Aak1	vCM1	Two-sided Wilcoxon test	0.25	25
0.00163459	0.300307	0.416	0.345	1	0	Fat3	vCM1	Two-sided Wilcoxon test	0.25	25
2.29732e-06	0.300299	0.614	0.476	0.0539502	0	Fbxl17	vCM1	Two-sided Wilcoxon test	0.25	25
0.00161148	0.300198	0.349	0.285	1	0	Atg10	vCM1	Two-sided Wilcoxon test	0.25	25
2.68988e-05	0.299835	0.597	0.502	0.631692	0	Phtf2	vCM1	Two-sided Wilcoxon test	0.25	25
3.86925e-06	0.298961	0.631	0.512	0.0908654	0	Dmxl1	vCM1	Two-sided Wilcoxon test	0.25	25
0.00607759	0.297882	0.389	0.35	1	0	Prpf39	vCM1	Two-sided Wilcoxon test	0.25	25
7.29575e-06	0.296878	0.691	0.565	0.171333	0	Wdr33	vCM1	Two-sided Wilcoxon test	0.25	25
0.00438615	0.295894	0.346	0.288	1	0	Tnik	vCM1	Two-sided Wilcoxon test	0.25	25
0.000174217	0.295368	0.554	0.468	1	0	Nedd4l	vCM1	Two-sided Wilcoxon test	0.25	25
3.53203e-06	0.295141	0.537	0.412	0.0829462	0	Diaph2	vCM1	Two-sided Wilcoxon test	0.25	25
1.14135e-05	0.294906	0.584	0.482	0.268034	0	Man1a2	vCM1	Two-sided Wilcoxon test	0.25	25
0.000818725	0.294899	0.416	0.348	1	0	Supt3	vCM1	Two-sided Wilcoxon test	0.25	25
0.000117479	0.294863	0.54	0.459	1	0	Memo1	vCM1	Two-sided Wilcoxon test	0.25	25
2.46746e-06	0.294635	0.812	0.715	0.0579459	0	Nsd1	vCM1	Two-sided Wilcoxon test	0.25	25
0.000211312	0.294517	0.581	0.514	1	0	Lama4	vCM1	Two-sided Wilcoxon test	0.25	25
9.71751e-05	0.294245	0.574	0.468	1	0	Phf21a	vCM1	Two-sided Wilcoxon test	0.25	25
0.00222333	0.294225	0.54	0.486	1	0	Tspan9	vCM1	Two-sided Wilcoxon test	0.25	25
0.000235247	0.293064	0.419	0.341	1	0	Stau2	vCM1	Two-sided Wilcoxon test	0.25	25
2.49407e-05	0.292413	0.43	0.333	0.585707	0	Fam189a2	vCM1	Two-sided Wilcoxon test	0.25	25
1.26215e-12	0.29213	0.883	0.649	2.96404e-08	0	Celf2	vCM1	Two-sided Wilcoxon test	0.25	25
8.62759e-09	0.291871	0.758	0.58	0.00020261	0	5430431A17Rik	vCM1	Two-sided Wilcoxon test	0.25	25
3.1272e-06	0.291384	0.493	0.398	0.0734393	0	Rev1	vCM1	Two-sided Wilcoxon test	0.25	25
0.00891611	0.291217	0.295	0.251	1	0	Arhgap44	vCM1	Two-sided Wilcoxon test	0.25	25
0.00442141	0.290695	0.289	0.241	1	0	Slc39a11	vCM1	Two-sided Wilcoxon test	0.25	25
3.72025e-06	0.289621	0.51	0.403	0.0873664	0	Uvrag	vCM1	Two-sided Wilcoxon test	0.25	25
0.00114184	0.289223	0.426	0.365	1	0	Mdn1	vCM1	Two-sided Wilcoxon test	0.25	25
3.54963e-05	0.288891	0.423	0.332	0.833595	0	Shb	vCM1	Two-sided Wilcoxon test	0.25	25
1.52342e-05	0.288691	0.456	0.372	0.35776	0	Acvr2a	vCM1	Two-sided Wilcoxon test	0.25	25
9.50186e-05	0.288581	0.359	0.245	1	0	Xist	vCM1	Two-sided Wilcoxon test	0.25	25
0.000878941	0.288476	0.312	0.241	1	0	Lysmd4	vCM1	Two-sided Wilcoxon test	0.25	25
1.69442e-05	0.288328	0.557	0.469	0.397917	0	Fryl	vCM1	Two-sided Wilcoxon test	0.25	25
0.000151794	0.288067	0.523	0.454	1	0	Prkag2	vCM1	Two-sided Wilcoxon test	0.25	25
0.00320231	0.288053	0.299	0.242	1	0	Slc16a10	vCM1	Two-sided Wilcoxon test	0.25	25
0.00163734	0.288004	0.406	0.359	1	0	Map2k5	vCM1	Two-sided Wilcoxon test	0.25	25
0.000766824	0.287333	0.497	0.425	1	0	Arhgap10	vCM1	Two-sided Wilcoxon test	0.25	25
0.000146346	0.286671	0.57	0.495	1	0	Usp28	vCM1	Two-sided Wilcoxon test	0.25	25
1.6486e-05	0.286192	0.346	0.251	0.387156	0	Lpar3	vCM1	Two-sided Wilcoxon test	0.25	25
1.74846e-05	0.285312	0.698	0.579	0.410608	0	Srek1	vCM1	Two-sided Wilcoxon test	0.25	25
0.00734224	0.283902	0.436	0.402	1	0	Clybl	vCM1	Two-sided Wilcoxon test	0.25	25
2.96334e-13	0.282705	0.775	0.534	6.9591e-09	0	Nfia	vCM1	Two-sided Wilcoxon test	0.25	25
0.00127824	0.282246	0.48	0.413	1	0	Kat6b	vCM1	Two-sided Wilcoxon test	0.25	25
8.64632e-06	0.282131	0.403	0.297	0.20305	0	Heg1	vCM1	Two-sided Wilcoxon test	0.25	25
2.48524e-12	0.281356	0.963	0.906	5.83633e-08	0	Macf1	vCM1	Two-sided Wilcoxon test	0.25	25
5.28555e-08	0.28127	0.819	0.699	0.00124126	0	Birc6	vCM1	Two-sided Wilcoxon test	0.25	25
4.79261e-05	0.281248	0.56	0.47	1	0	Abi2	vCM1	Two-sided Wilcoxon test	0.25	25
1.80767e-05	0.281177	0.52	0.409	0.424513	0	Dock1	vCM1	Two-sided Wilcoxon test	0.25	25
0.000773146	0.28084	0.433	0.371	1	0	Rai1	vCM1	Two-sided Wilcoxon test	0.25	25
1.01642e-05	0.28066	0.671	0.541	0.238697	0	Prickle1	vCM1	Two-sided Wilcoxon test	0.25	25
0.00346683	0.28043	0.332	0.277	1	0	Pde3b	vCM1	Two-sided Wilcoxon test	0.25	25
0.000142902	0.280231	0.413	0.329	1	0	Kansl1l	vCM1	Two-sided Wilcoxon test	0.25	25
1.33464e-05	0.279711	0.584	0.474	0.313426	0	Med13	vCM1	Two-sided Wilcoxon test	0.25	25
8.8301e-05	0.279444	0.413	0.326	1	0	Mid2	vCM1	Two-sided Wilcoxon test	0.25	25
1.73885e-05	0.279181	0.487	0.38	0.408353	0	Plekha5	vCM1	Two-sided Wilcoxon test	0.25	25
3.54654e-05	0.278729	0.356	0.26	0.83287	0	Gm35188	vCM1	Two-sided Wilcoxon test	0.25	25
2.90527e-07	0.277784	0.752	0.571	0.00682275	0	Bmpr1a	vCM1	Two-sided Wilcoxon test	0.25	25
0.00999067	0.277197	0.359	0.311	1	0	Rps6ka5	vCM1	Two-sided Wilcoxon test	0.25	25
1.52969e-06	0.277114	0.775	0.686	0.0359232	0	Cdk8	vCM1	Two-sided Wilcoxon test	0.25	25
0.00520997	0.275956	0.369	0.321	1	0	Prkdc	vCM1	Two-sided Wilcoxon test	0.25	25
2.7711e-07	0.274442	0.601	0.463	0.00650766	0	Nos1ap	vCM1	Two-sided Wilcoxon test	0.25	25
2.94361e-05	0.274412	0.617	0.531	0.691277	0	Kcng2	vCM1	Two-sided Wilcoxon test	0.25	25
0.000930145	0.274225	0.389	0.32	1	0	Tiam1	vCM1	Two-sided Wilcoxon test	0.25	25
3.26413e-07	0.273755	0.832	0.747	0.00766548	0	Ktn1	vCM1	Two-sided Wilcoxon test	0.25	25
1.17765e-13	0.273662	0.916	0.633	2.76559e-09	0	Auts2	vCM1	Two-sided Wilcoxon test	0.25	25
9.82347e-05	0.273649	0.681	0.593	1	0	Tlk1	vCM1	Two-sided Wilcoxon test	0.25	25
3.35798e-05	0.273336	0.611	0.522	0.788589	0	Smg1	vCM1	Two-sided Wilcoxon test	0.25	25
1.14916e-07	0.273169	0.648	0.481	0.00269869	0	Pbx3	vCM1	Two-sided Wilcoxon test	0.25	25
1.39534e-06	0.273105	0.53	0.405	0.0327682	0	Tecrl	vCM1	Two-sided Wilcoxon test	0.25	25
0.000642509	0.273017	0.47	0.399	1	0	Pou2f1	vCM1	Two-sided Wilcoxon test	0.25	25
1.27431e-05	0.272715	0.564	0.472	0.299258	0	Usp24	vCM1	Two-sided Wilcoxon test	0.25	25
0.0002508	0.272333	0.564	0.477	1	0	Ppargc1a	vCM1	Two-sided Wilcoxon test	0.25	25
9.60392e-05	0.271055	0.523	0.428	1	0	Ogt	vCM1	Two-sided Wilcoxon test	0.25	25
0.000473247	0.270738	0.577	0.515	1	0	Atad2b	vCM1	Two-sided Wilcoxon test	0.25	25
0.00017203	0.270416	0.295	0.214	1	0	Zfp710	vCM1	Two-sided Wilcoxon test	0.25	25
0.000522931	0.270331	0.322	0.256	1	0	Rbm4b	vCM1	Two-sided Wilcoxon test	0.25	25
0.00371457	0.269502	0.44	0.389	1	0	Cbfa2t2	vCM1	Two-sided Wilcoxon test	0.25	25
0.00374995	0.268766	0.416	0.374	1	0	Ankib1	vCM1	Two-sided Wilcoxon test	0.25	25
0.000643048	0.2685	0.463	0.388	1	0	Trerf1	vCM1	Two-sided Wilcoxon test	0.25	25
0.0037931	0.267987	0.53	0.486	1	0	Taf1d	vCM1	Two-sided Wilcoxon test	0.25	25
0.00026308	0.267138	0.755	0.653	1	0	Add3	vCM1	Two-sided Wilcoxon test	0.25	25
0.00967827	0.266371	0.456	0.416	1	0	Syne1	vCM1	Two-sided Wilcoxon test	0.25	25
2.38925e-05	0.266277	0.634	0.544	0.561092	0	Pkp2	vCM1	Two-sided Wilcoxon test	0.25	25
0.0013721	0.266225	0.302	0.243	1	0	Mcm9	vCM1	Two-sided Wilcoxon test	0.25	25
7.64781e-05	0.266092	0.604	0.516	1	0	R3hdm1	vCM1	Two-sided Wilcoxon test	0.25	25
0.000926981	0.265451	0.406	0.338	1	0	Ednra	vCM1	Two-sided Wilcoxon test	0.25	25
0.00104765	0.265408	0.346	0.265	1	0	Snap91	vCM1	Two-sided Wilcoxon test	0.25	25
0.000115688	0.265393	0.5	0.408	1	0	Med12l	vCM1	Two-sided Wilcoxon test	0.25	25
4.29055e-05	0.265365	0.822	0.724	1	0	Ldb3	vCM1	Two-sided Wilcoxon test	0.25	25
0.00918819	0.264797	0.47	0.433	1	0	Itch	vCM1	Two-sided Wilcoxon test	0.25	25
0.00265218	0.264584	0.295	0.239	1	0	Znrf2	vCM1	Two-sided Wilcoxon test	0.25	25
4.00161e-05	0.264032	0.577	0.495	0.939738	0	Nbeal1	vCM1	Two-sided Wilcoxon test	0.25	25
5.46418e-07	0.263963	0.899	0.818	0.0128321	0	Ccdc141	vCM1	Two-sided Wilcoxon test	0.25	25
6.39611e-05	0.262047	0.473	0.385	1	0	Herc4	vCM1	Two-sided Wilcoxon test	0.25	25
1.20392e-05	0.26158	0.832	0.703	0.28273	0	Luc7l2	vCM1	Two-sided Wilcoxon test	0.25	25
2.96318e-06	0.261447	0.826	0.7	0.0695874	0	Usp34	vCM1	Two-sided Wilcoxon test	0.25	25
0.00168337	0.261343	0.413	0.351	1	0	Sec24d	vCM1	Two-sided Wilcoxon test	0.25	25
1.12721e-06	0.261272	0.812	0.64	0.0264713	0	Rbfox2	vCM1	Two-sided Wilcoxon test	0.25	25
6.64846e-07	0.2612	0.805	0.66	0.0156132	0	Cux1	vCM1	Two-sided Wilcoxon test	0.25	25
0.00110885	0.26064	0.56	0.491	1	0	Epb41	vCM1	Two-sided Wilcoxon test	0.25	25
0.000365283	0.260335	0.577	0.482	1	0	Cers6	vCM1	Two-sided Wilcoxon test	0.25	25
0.00730296	0.260244	0.309	0.27	1	0	Eif2ak4	vCM1	Two-sided Wilcoxon test	0.25	25
0.00174576	0.260086	0.322	0.26	1	0	Clip4	vCM1	Two-sided Wilcoxon test	0.25	25
0.00289056	0.258814	0.389	0.343	1	0	Xpo4	vCM1	Two-sided Wilcoxon test	0.25	25
0.00207143	0.258271	0.466	0.382	1	0	Fstl4	vCM1	Two-sided Wilcoxon test	0.25	25
0.000622352	0.258137	0.46	0.38	1	0	Csnk1g1	vCM1	Two-sided Wilcoxon test	0.25	25
7.7087e-05	0.257644	0.695	0.572	1	0	Wwc2	vCM1	Two-sided Wilcoxon test	0.25	25
0.000399935	0.257321	0.544	0.457	1	0	Ap3b1	vCM1	Two-sided Wilcoxon test	0.25	25
0.000376916	0.256642	0.497	0.428	1	0	Clcn5	vCM1	Two-sided Wilcoxon test	0.25	25
0.000208872	0.256404	0.644	0.553	1	0	Cpsf6	vCM1	Two-sided Wilcoxon test	0.25	25
0.00273029	0.25631	0.299	0.246	1	0	Satb1	vCM1	Two-sided Wilcoxon test	0.25	25
1.8028e-05	0.256187	0.44	0.328	0.42337	0	Erc2	vCM1	Two-sided Wilcoxon test	0.25	25
0.00081407	0.255945	0.554	0.498	1	0	Atp13a3	vCM1	Two-sided Wilcoxon test	0.25	25
0.000136621	0.255937	0.617	0.518	1	0	Luzp1	vCM1	Two-sided Wilcoxon test	0.25	25
0.00498262	0.255504	0.292	0.246	1	0	Cep85l	vCM1	Two-sided Wilcoxon test	0.25	25
0.00966585	0.255193	0.285	0.243	1	0	Tasp1	vCM1	Two-sided Wilcoxon test	0.25	25
0.00337422	0.254963	0.255	0.2	1	0	Tpk1	vCM1	Two-sided Wilcoxon test	0.25	25
0.000435789	0.254777	0.527	0.454	1	0	Zfp609	vCM1	Two-sided Wilcoxon test	0.25	25
8.84938e-06	0.252961	0.762	0.62	0.207819	0	Zfand3	vCM1	Two-sided Wilcoxon test	0.25	25
0.00454783	0.252846	0.456	0.42	1	0	Ipo11	vCM1	Two-sided Wilcoxon test	0.25	25
0.00819648	0.251637	0.262	0.215	1	0	Baiap2l1	vCM1	Two-sided Wilcoxon test	0.25	25
0.00227128	0.251605	0.376	0.316	1	0	Man1c1	vCM1	Two-sided Wilcoxon test	0.25	25
0.000118567	0.25121	0.611	0.519	1	0	Zmym4	vCM1	Two-sided Wilcoxon test	0.25	25
0.000147877	0.251048	0.527	0.444	1	0	Rap1gds1	vCM1	Two-sided Wilcoxon test	0.25	25
5.84478e-06	0.250848	0.815	0.735	0.137259	0	Dst	vCM1	Two-sided Wilcoxon test	0.25	25
8.32164e-19	1.69113	0.584	0.425	1.95425e-14	1	Cited1	vCM2	Two-sided Wilcoxon test	0.25	25
6.55022e-09	1.49121	0.639	0.597	0.000153825	1	Nppa	vCM2	Two-sided Wilcoxon test	0.25	25
5.3025e-56	1.2861	0.964	0.847	1.24524e-51	1	Myh7	vCM2	Two-sided Wilcoxon test	0.25	25
2.28344e-56	1.22908	1	0.971	5.36242e-52	1	Ttn	vCM2	Two-sided Wilcoxon test	0.25	25
1.95358e-20	1.06509	0.796	0.707	4.58778e-16	1	Mest	vCM2	Two-sided Wilcoxon test	0.25	25
6.50028e-46	1.01676	0.953	0.865	1.52653e-41	1	Mybpc3	vCM2	Two-sided Wilcoxon test	0.25	25
2.40329e-34	0.961781	0.953	0.896	5.64388e-30	1	Hspd1	vCM2	Two-sided Wilcoxon test	0.25	25
2.41795e-35	0.900016	0.909	0.832	5.67831e-31	1	Vcp	vCM2	Two-sided Wilcoxon test	0.25	25
3.93059e-32	0.898509	0.989	0.907	9.23061e-28	1	Myl3	vCM2	Two-sided Wilcoxon test	0.25	25
7.18916e-17	0.877868	0.748	0.644	1.6883e-12	1	Pln	vCM2	Two-sided Wilcoxon test	0.25	25
3.92637e-23	0.875408	0.858	0.797	9.22069e-19	1	Cdkn1c	vCM2	Two-sided Wilcoxon test	0.25	25
4.72417e-10	0.869642	0.5	0.425	1.10942e-05	1	Tgm2	vCM2	Two-sided Wilcoxon test	0.25	25
1.94318e-36	0.85953	0.967	0.981	4.56337e-32	1	Cmss1	vCM2	Two-sided Wilcoxon test	0.25	25
2.02904e-51	0.854335	1	1	4.765e-47	1	AY036118	vCM2	Two-sided Wilcoxon test	0.25	25
1.64476e-19	0.841945	0.704	0.655	3.86256e-15	1	Ndufs1	vCM2	Two-sided Wilcoxon test	0.25	25
2.23387e-13	0.837278	0.664	0.618	5.24602e-09	1	Rrad	vCM2	Two-sided Wilcoxon test	0.25	25
1.16757e-19	0.822969	0.814	0.811	2.74191e-15	1	Mdh1	vCM2	Two-sided Wilcoxon test	0.25	25
1.34273e-28	0.813847	0.909	0.886	3.15328e-24	1	Pgam1	vCM2	Two-sided Wilcoxon test	0.25	25
4.71589e-28	0.806082	0.938	0.891	1.10748e-23	1	Hspb1	vCM2	Two-sided Wilcoxon test	0.25	25
2.38203e-22	0.787385	0.905	0.886	5.59397e-18	1	Tpi1	vCM2	Two-sided Wilcoxon test	0.25	25
4.32998e-28	0.758429	0.964	0.932	1.01685e-23	1	Atp5b	vCM2	Two-sided Wilcoxon test	0.25	25
6.18758e-27	0.74895	0.993	0.94	1.45309e-22	1	Myl2	vCM2	Two-sided Wilcoxon test	0.25	25
3.07159e-09	0.748865	0.602	0.62	7.21332e-05	1	Suclg1	vCM2	Two-sided Wilcoxon test	0.25	25
1.20219e-28	0.742554	0.945	0.927	2.82322e-24	1	Atp5a1	vCM2	Two-sided Wilcoxon test	0.25	25
3.88434e-08	0.742364	0.493	0.457	0.000912199	1	Xirp1	vCM2	Two-sided Wilcoxon test	0.25	25
2.30066e-21	0.728912	0.982	0.978	5.40287e-17	1	Tnnt2	vCM2	Two-sided Wilcoxon test	0.25	25
1.59867e-20	0.724533	0.883	0.815	3.75432e-16	1	Crip2	vCM2	Two-sided Wilcoxon test	0.25	25
1.02895e-13	0.720104	0.752	0.745	2.41638e-09	1	Ubc	vCM2	Two-sided Wilcoxon test	0.25	25
2.4665e-12	0.719479	0.726	0.733	5.79232e-08	1	Manf	vCM2	Two-sided Wilcoxon test	0.25	25
8.88139e-33	0.713726	0.974	0.957	2.08571e-28	1	Nedd4	vCM2	Two-sided Wilcoxon test	0.25	25
4.70084e-13	0.711338	0.723	0.72	1.10395e-08	1	Dsp	vCM2	Two-sided Wilcoxon test	0.25	25
2.27858e-11	0.703794	0.704	0.743	5.35103e-07	1	Cyc1	vCM2	Two-sided Wilcoxon test	0.25	25
0.00012539	0.69333	0.533	0.552	1	1	Hmgcs1	vCM2	Two-sided Wilcoxon test	0.25	25
2.62909e-22	0.686469	0.894	0.869	6.17416e-18	1	Pgk1	vCM2	Two-sided Wilcoxon test	0.25	25
2.02055e-14	0.682318	0.777	0.746	4.74505e-10	1	Des	vCM2	Two-sided Wilcoxon test	0.25	25
1.884e-16	0.676615	0.912	0.903	4.42438e-12	1	Hspa5	vCM2	Two-sided Wilcoxon test	0.25	25
2.1895e-09	0.671343	0.573	0.55	5.14181e-05	1	Copb2	vCM2	Two-sided Wilcoxon test	0.25	25
2.1135e-06	0.665399	0.536	0.558	0.0496335	1	Dld	vCM2	Two-sided Wilcoxon test	0.25	25
4.57998e-18	0.664978	0.836	0.815	1.07556e-13	1	Mdh2	vCM2	Two-sided Wilcoxon test	0.25	25
2.22245e-10	0.664	0.646	0.67	5.2192e-06	1	Tln1	vCM2	Two-sided Wilcoxon test	0.25	25
4.36345e-09	0.661285	0.631	0.659	0.000102471	1	Ndufv1	vCM2	Two-sided Wilcoxon test	0.25	25
2.74113e-10	0.660065	0.679	0.685	6.43726e-06	1	Cct7	vCM2	Two-sided Wilcoxon test	0.25	25
7.29158e-11	0.657157	0.661	0.666	1.71235e-06	1	Cct5	vCM2	Two-sided Wilcoxon test	0.25	25
9.37374e-09	0.648435	0.682	0.703	0.000220133	1	Uqcrc2	vCM2	Two-sided Wilcoxon test	0.25	25
1.7233e-07	0.643005	0.599	0.621	0.00404699	1	Psmd2	vCM2	Two-sided Wilcoxon test	0.25	25
1.44585e-10	0.63936	0.642	0.63	3.39544e-06	1	Got1	vCM2	Two-sided Wilcoxon test	0.25	25
1.9531e-12	0.634944	0.723	0.718	4.58666e-08	1	Flnc	vCM2	Two-sided Wilcoxon test	0.25	25
1.78628e-07	0.62902	0.635	0.67	0.00419491	1	Sod2	vCM2	Two-sided Wilcoxon test	0.25	25
3.93121e-16	0.620597	0.85	0.865	9.23205e-12	1	Camk1d	vCM2	Two-sided Wilcoxon test	0.25	25
9.89295e-10	0.619466	0.766	0.828	2.32326e-05	1	Pdia6	vCM2	Two-sided Wilcoxon test	0.25	25
2.49611e-28	0.618857	1	0.987	5.86186e-24	1	Hsp90ab1	vCM2	Two-sided Wilcoxon test	0.25	25
1.1409e-21	0.611952	0.934	0.927	2.67928e-17	1	Pkm	vCM2	Two-sided Wilcoxon test	0.25	25
2.50465e-20	0.60859	0.971	0.946	5.88191e-16	1	Slc25a4	vCM2	Two-sided Wilcoxon test	0.25	25
3.72309e-13	0.607707	0.799	0.767	8.74331e-09	1	Eif5a	vCM2	Two-sided Wilcoxon test	0.25	25
8.03389e-17	0.607417	0.945	0.933	1.88668e-12	1	Hsp90aa1	vCM2	Two-sided Wilcoxon test	0.25	25
1.66476e-05	0.599664	0.54	0.578	0.390952	1	Psmc5	vCM2	Two-sided Wilcoxon test	0.25	25
5.1471e-09	0.59958	0.679	0.715	0.000120875	1	Eif4g1	vCM2	Two-sided Wilcoxon test	0.25	25
0.00970873	0.594046	0.35	0.356	1	1	Capn6	vCM2	Two-sided Wilcoxon test	0.25	25
8.89216e-06	0.594038	0.584	0.61	0.208824	1	Asb2	vCM2	Two-sided Wilcoxon test	0.25	25
3.25372e-12	0.590799	0.734	0.746	7.64103e-08	1	Unc45b	vCM2	Two-sided Wilcoxon test	0.25	25
1.52324e-06	0.589221	0.606	0.654	0.0357717	1	Maged1	vCM2	Two-sided Wilcoxon test	0.25	25
2.59067e-15	0.587102	0.934	0.924	6.08393e-11	1	Nebl	vCM2	Two-sided Wilcoxon test	0.25	25
7.88197e-15	0.578792	0.858	0.846	1.851e-10	1	Atp5g3	vCM2	Two-sided Wilcoxon test	0.25	25
4.32357e-10	0.576212	0.715	0.735	1.01535e-05	1	Cct3	vCM2	Two-sided Wilcoxon test	0.25	25
2.18394e-06	0.576084	0.631	0.673	0.0512875	1	Sf3b2	vCM2	Two-sided Wilcoxon test	0.25	25
4.77075e-05	0.575118	0.507	0.531	1	1	Ctsd	vCM2	Two-sided Wilcoxon test	0.25	25
5.96482e-12	0.573803	0.77	0.766	1.40078e-07	1	Cct8	vCM2	Two-sided Wilcoxon test	0.25	25
0.00486459	0.573641	0.281	0.246	1	1	Ung	vCM2	Two-sided Wilcoxon test	0.25	25
6.13697e-05	0.572194	0.526	0.553	1	1	Acadm	vCM2	Two-sided Wilcoxon test	0.25	25
4.52644e-15	0.569962	0.909	0.906	1.06299e-10	1	Eif4a1	vCM2	Two-sided Wilcoxon test	0.25	25
7.61957e-09	0.569694	0.642	0.617	0.000178938	1	Ckb	vCM2	Two-sided Wilcoxon test	0.25	25
2.80805e-06	0.568126	0.62	0.67	0.0659442	1	Pfkl	vCM2	Two-sided Wilcoxon test	0.25	25
6.29036e-11	0.566315	0.901	0.888	1.47723e-06	1	Tnni1	vCM2	Two-sided Wilcoxon test	0.25	25
2.5261e-07	0.564371	0.613	0.641	0.00593229	1	Etfa	vCM2	Two-sided Wilcoxon test	0.25	25
0.00574365	0.561778	0.35	0.333	1	1	Gja1	vCM2	Two-sided Wilcoxon test	0.25	25
1.82374e-05	0.56042	0.547	0.567	0.428287	1	Sdhb	vCM2	Two-sided Wilcoxon test	0.25	25
8.66709e-14	0.560123	0.792	0.806	2.03538e-09	1	Hspa9	vCM2	Two-sided Wilcoxon test	0.25	25
3.28454e-35	0.555822	1	1	7.71341e-31	1	Gm42418	vCM2	Two-sided Wilcoxon test	0.25	25
1.54952e-10	0.555483	0.799	0.791	3.6389e-06	1	Atp5f1	vCM2	Two-sided Wilcoxon test	0.25	25
0.00717266	0.553142	0.5	0.603	1	1	Psmd12	vCM2	Two-sided Wilcoxon test	0.25	25
5.05021e-06	0.553028	0.62	0.671	0.118599	1	Prkar1a	vCM2	Two-sided Wilcoxon test	0.25	25
0.000752661	0.552684	0.631	0.699	1	1	Fabp3	vCM2	Two-sided Wilcoxon test	0.25	25
3.99022e-10	0.551582	0.832	0.856	9.37064e-06	1	Sub1	vCM2	Two-sided Wilcoxon test	0.25	25
7.51574e-06	0.543583	0.573	0.609	0.1765	1	Hadha	vCM2	Two-sided Wilcoxon test	0.25	25
4.02695e-10	0.543153	0.807	0.828	9.45688e-06	1	Eef2	vCM2	Two-sided Wilcoxon test	0.25	25
0.000222913	0.537607	0.562	0.643	1	1	Psmc6	vCM2	Two-sided Wilcoxon test	0.25	25
0.00517233	0.537356	0.27	0.23	1	1	Mb	vCM2	Two-sided Wilcoxon test	0.25	25
3.16924e-08	0.535933	0.686	0.719	0.000744264	1	Hk1	vCM2	Two-sided Wilcoxon test	0.25	25
0.00100393	0.533746	0.5	0.545	1	1	Pabpc4	vCM2	Two-sided Wilcoxon test	0.25	25
3.16214e-11	0.532377	0.847	0.857	7.42596e-07	1	Eno1	vCM2	Two-sided Wilcoxon test	0.25	25
1.04918e-08	0.53114	0.759	0.773	0.000246388	1	Uqcrb	vCM2	Two-sided Wilcoxon test	0.25	25
6.02355e-08	0.530709	0.701	0.732	0.00141457	1	Dnaja1	vCM2	Two-sided Wilcoxon test	0.25	25
9.59443e-06	0.530704	0.573	0.604	0.225316	1	Swi5	vCM2	Two-sided Wilcoxon test	0.25	25
4.21751e-15	0.528255	0.891	0.885	9.9044e-11	1	Chchd2	vCM2	Two-sided Wilcoxon test	0.25	25
3.6533e-07	0.527882	0.719	0.788	0.00857941	1	Ssb	vCM2	Two-sided Wilcoxon test	0.25	25
1.9414e-05	0.526652	0.566	0.584	0.455919	1	Apobec2	vCM2	Two-sided Wilcoxon test	0.25	25
2.38337e-05	0.524666	0.591	0.641	0.55971	1	Uqcrfs1	vCM2	Two-sided Wilcoxon test	0.25	25
0.000698581	0.523518	0.54	0.584	1	1	Aprt	vCM2	Two-sided Wilcoxon test	0.25	25
2.28468e-11	0.523366	0.88	0.879	5.36535e-07	1	Ncl	vCM2	Two-sided Wilcoxon test	0.25	25
0.00032322	0.517046	0.511	0.548	1	1	Echs1	vCM2	Two-sided Wilcoxon test	0.25	25
7.96989e-06	0.516344	0.489	0.462	0.187165	1	Sdhd	vCM2	Two-sided Wilcoxon test	0.25	25
4.5335e-16	0.514773	0.974	0.944	1.06465e-11	1	Hspa8	vCM2	Two-sided Wilcoxon test	0.25	25
6.54988e-07	0.514344	0.69	0.752	0.0153817	1	Fkbp3	vCM2	Two-sided Wilcoxon test	0.25	25
5.77744e-10	0.509105	0.788	0.802	1.35677e-05	1	Calr	vCM2	Two-sided Wilcoxon test	0.25	25
0.000931823	0.503135	0.533	0.575	1	1	Mrpl18	vCM2	Two-sided Wilcoxon test	0.25	25
2.56918e-05	0.502403	0.533	0.558	0.603346	1	Mlec	vCM2	Two-sided Wilcoxon test	0.25	25
1.01125e-08	0.501147	0.818	0.841	0.000237481	1	Hnrnpu	vCM2	Two-sided Wilcoxon test	0.25	25
0.00690677	0.500807	0.456	0.514	1	1	Blmh	vCM2	Two-sided Wilcoxon test	0.25	25
4.84777e-08	0.500685	0.77	0.799	0.00113845	1	Gpi1	vCM2	Two-sided Wilcoxon test	0.25	25
0.00502921	0.500204	0.518	0.617	1	1	Psmc4	vCM2	Two-sided Wilcoxon test	0.25	25
0.00333946	0.499702	0.558	0.645	1	1	Zfp106	vCM2	Two-sided Wilcoxon test	0.25	25
0.000286496	0.498731	0.573	0.637	1	1	Dad1	vCM2	Two-sided Wilcoxon test	0.25	25
6.22512e-05	0.495941	0.675	0.745	1	1	Chd4	vCM2	Two-sided Wilcoxon test	0.25	25
3.20066e-07	0.493091	0.686	0.677	0.00751642	1	Slc25a5	vCM2	Two-sided Wilcoxon test	0.25	25
1.08873e-09	0.48811	0.894	0.89	2.55677e-05	1	Cox5a	vCM2	Two-sided Wilcoxon test	0.25	25
0.00329627	0.487031	0.54	0.645	1	1	Tmed9	vCM2	Two-sided Wilcoxon test	0.25	25
0.00571589	0.486668	0.474	0.535	1	1	Uba1	vCM2	Two-sided Wilcoxon test	0.25	25
6.14485e-09	0.485947	0.796	0.766	0.000144306	1	Sh3bgr	vCM2	Two-sided Wilcoxon test	0.25	25
0.000217745	0.480772	0.555	0.624	1	1	Ndufs2	vCM2	Two-sided Wilcoxon test	0.25	25
3.42727e-05	0.48045	0.657	0.71	0.804859	1	Scd2	vCM2	Two-sided Wilcoxon test	0.25	25
0.00722412	0.479695	0.533	0.618	1	1	Eif5b	vCM2	Two-sided Wilcoxon test	0.25	25
8.57998e-10	0.476562	0.847	0.847	2.01492e-05	1	Prdx1	vCM2	Two-sided Wilcoxon test	0.25	25
2.72993e-16	0.475994	0.985	0.98	6.41096e-12	1	Myl4	vCM2	Two-sided Wilcoxon test	0.25	25
0.00019313	0.475323	0.588	0.633	1	1	Ndufv2	vCM2	Two-sided Wilcoxon test	0.25	25
0.000681626	0.473008	0.599	0.673	1	1	Ctnnb1	vCM2	Two-sided Wilcoxon test	0.25	25
0.00124792	0.470118	0.591	0.645	1	1	Hcfc1r1	vCM2	Two-sided Wilcoxon test	0.25	25
1.36034e-12	0.469907	0.96	0.944	3.19462e-08	1	Mif	vCM2	Two-sided Wilcoxon test	0.25	25
4.12872e-07	0.469364	0.719	0.747	0.0096959	1	Canx	vCM2	Two-sided Wilcoxon test	0.25	25
0.000919069	0.468342	0.533	0.6	1	1	Psmc3	vCM2	Two-sided Wilcoxon test	0.25	25
0.000656806	0.46786	0.599	0.676	1	1	Ldhb	vCM2	Two-sided Wilcoxon test	0.25	25
0.00058225	0.467313	0.588	0.642	1	1	Etfb	vCM2	Two-sided Wilcoxon test	0.25	25
4.86411e-09	0.46616	0.836	0.862	0.000114229	1	Atp5d	vCM2	Two-sided Wilcoxon test	0.25	25
1.06117e-05	0.465266	0.675	0.654	0.249206	1	Ccnd2	vCM2	Two-sided Wilcoxon test	0.25	25
2.50671e-05	0.465083	0.628	0.663	0.588677	1	Psmb6	vCM2	Two-sided Wilcoxon test	0.25	25
0.00452204	0.464665	0.526	0.587	1	1	Ndufs7	vCM2	Two-sided Wilcoxon test	0.25	25
4.58086e-06	0.464206	0.752	0.816	0.107577	1	Slc25a3	vCM2	Two-sided Wilcoxon test	0.25	25
9.21489e-05	0.463639	0.624	0.675	1	1	Vdac3	vCM2	Two-sided Wilcoxon test	0.25	25
2.67845e-12	0.462411	0.964	0.952	6.29007e-08	1	Npm1	vCM2	Two-sided Wilcoxon test	0.25	25
0.00284879	0.46152	0.544	0.545	1	1	Acta1	vCM2	Two-sided Wilcoxon test	0.25	25
6.90254e-10	0.460398	0.869	0.885	1.62099e-05	1	Serbp1	vCM2	Two-sided Wilcoxon test	0.25	25
0.00422797	0.459797	0.504	0.525	1	1	Hspb7	vCM2	Two-sided Wilcoxon test	0.25	25
0.000255462	0.459143	0.73	0.807	1	1	Pdia3	vCM2	Two-sided Wilcoxon test	0.25	25
0.00199999	0.455137	0.533	0.594	1	1	Dag1	vCM2	Two-sided Wilcoxon test	0.25	25
2.23629e-18	0.451233	0.996	0.994	5.25171e-14	1	Actc1	vCM2	Two-sided Wilcoxon test	0.25	25
7.40068e-08	0.445615	0.748	0.779	0.00173798	1	Vdac1	vCM2	Two-sided Wilcoxon test	0.25	25
6.32991e-11	0.444985	0.956	0.959	1.48652e-06	1	Ubb	vCM2	Two-sided Wilcoxon test	0.25	25
0.000355093	0.44324	0.628	0.713	1	1	G3bp1	vCM2	Two-sided Wilcoxon test	0.25	25
0.00256328	0.442512	0.515	0.558	1	1	Cox6a1	vCM2	Two-sided Wilcoxon test	0.25	25
0.000804589	0.441485	0.577	0.64	1	1	Kpnb1	vCM2	Two-sided Wilcoxon test	0.25	25
6.05685e-11	0.440496	0.971	0.966	1.42239e-06	1	Tnnc1	vCM2	Two-sided Wilcoxon test	0.25	25
0.00535	0.439824	0.526	0.589	1	1	Gspt1	vCM2	Two-sided Wilcoxon test	0.25	25
1.03365e-05	0.439131	0.723	0.774	0.242742	1	Cbx5	vCM2	Two-sided Wilcoxon test	0.25	25
0.00100746	0.438851	0.628	0.737	1	1	Eprs	vCM2	Two-sided Wilcoxon test	0.25	25
2.76465e-05	0.438253	0.657	0.703	0.649249	1	Smyd1	vCM2	Two-sided Wilcoxon test	0.25	25
0.00336689	0.437479	0.628	0.748	1	1	Hdlbp	vCM2	Two-sided Wilcoxon test	0.25	25
0.00907767	0.437096	0.474	0.523	1	1	Lpl	vCM2	Two-sided Wilcoxon test	0.25	25
3.0054e-10	0.434224	0.883	0.861	7.05789e-06	1	Csrp3	vCM2	Two-sided Wilcoxon test	0.25	25
9.1471e-05	0.432817	0.679	0.733	1	1	Cct6a	vCM2	Two-sided Wilcoxon test	0.25	25
0.000170996	0.432342	0.62	0.654	1	1	Nme1	vCM2	Two-sided Wilcoxon test	0.25	25
0.000352317	0.432039	0.624	0.708	1	1	Bzw1	vCM2	Two-sided Wilcoxon test	0.25	25
1.91962e-06	0.430686	0.741	0.772	0.0450803	1	Ndufab1	vCM2	Two-sided Wilcoxon test	0.25	25
5.45762e-05	0.428835	0.631	0.695	1	1	Eif3c	vCM2	Two-sided Wilcoxon test	0.25	25
4.86108e-05	0.428799	0.697	0.77	1	1	Ndufc2	vCM2	Two-sided Wilcoxon test	0.25	25
0.000273495	0.426393	0.69	0.712	1	1	Smpx	vCM2	Two-sided Wilcoxon test	0.25	25
0.0016459	0.425882	0.555	0.629	1	1	Stip1	vCM2	Two-sided Wilcoxon test	0.25	25
1.95829e-06	0.424243	0.719	0.742	0.0459886	1	Fkbp1a	vCM2	Two-sided Wilcoxon test	0.25	25
0.00304625	0.424198	0.533	0.596	1	1	Psma5	vCM2	Two-sided Wilcoxon test	0.25	25
0.000189984	0.423534	0.577	0.626	1	1	Mtch1	vCM2	Two-sided Wilcoxon test	0.25	25
8.59239e-10	0.419855	0.971	0.944	2.01784e-05	1	Tubb5	vCM2	Two-sided Wilcoxon test	0.25	25
2.26092e-06	0.418431	0.807	0.838	0.0530954	1	Idh2	vCM2	Two-sided Wilcoxon test	0.25	25
2.23962e-05	0.417751	0.657	0.674	0.525952	1	C1qbp	vCM2	Two-sided Wilcoxon test	0.25	25
0.00572481	0.417477	0.529	0.589	1	1	Fkbp4	vCM2	Two-sided Wilcoxon test	0.25	25
1.90621e-06	0.416831	0.682	0.727	0.0447654	1	Immt	vCM2	Two-sided Wilcoxon test	0.25	25
4.02963e-14	0.416384	0.982	0.991	9.46318e-10	1	Ppia	vCM2	Two-sided Wilcoxon test	0.25	25
1.06042e-08	0.4138	0.839	0.853	0.000249028	1	Eef1g	vCM2	Two-sided Wilcoxon test	0.25	25
0.000203795	0.409746	0.617	0.682	1	1	Mrfap1	vCM2	Two-sided Wilcoxon test	0.25	25
3.16519e-05	0.408956	0.693	0.745	0.743313	1	Psma3	vCM2	Two-sided Wilcoxon test	0.25	25
1.1147e-05	0.408314	0.745	0.788	0.261776	1	Vdac2	vCM2	Two-sided Wilcoxon test	0.25	25
0.000496057	0.407704	0.595	0.668	1	1	Park7	vCM2	Two-sided Wilcoxon test	0.25	25
6.20821e-08	0.406234	0.854	0.858	0.00145794	1	Myl9	vCM2	Two-sided Wilcoxon test	0.25	25
1.53155e-09	0.403601	0.912	0.915	3.5967e-05	1	Aldoa	vCM2	Two-sided Wilcoxon test	0.25	25
0.00901835	0.401689	0.573	0.649	1	1	Oip5os1	vCM2	Two-sided Wilcoxon test	0.25	25
0.000725697	0.39904	0.628	0.728	1	1	Sarnp	vCM2	Two-sided Wilcoxon test	0.25	25
0.00320714	0.398582	0.562	0.616	1	1	Eif3m	vCM2	Two-sided Wilcoxon test	0.25	25
1.93863e-08	0.398325	0.796	0.832	0.000455269	1	Myh10	vCM2	Two-sided Wilcoxon test	0.25	25
3.85037e-07	0.397661	0.814	0.847	0.00904222	1	Atp1a1	vCM2	Two-sided Wilcoxon test	0.25	25
1.60422e-06	0.397404	0.785	0.865	0.0376736	1	Hnrnpk	vCM2	Two-sided Wilcoxon test	0.25	25
0.000142768	0.395012	0.668	0.704	1	1	Eif4ebp1	vCM2	Two-sided Wilcoxon test	0.25	25
4.98731e-06	0.394744	0.697	0.72	0.117122	1	Cd81	vCM2	Two-sided Wilcoxon test	0.25	25
1.31177e-06	0.390866	0.788	0.819	0.0308055	1	Hnrnpf	vCM2	Two-sided Wilcoxon test	0.25	25
0.00449505	0.385031	0.631	0.695	1	1	Eef1d	vCM2	Two-sided Wilcoxon test	0.25	25
0.00254346	0.38474	0.558	0.628	1	1	Phb2	vCM2	Two-sided Wilcoxon test	0.25	25
0.00118976	0.384333	0.675	0.756	1	1	Hnrnpd	vCM2	Two-sided Wilcoxon test	0.25	25
4.42667e-05	0.383761	0.836	0.877	1	1	Nexn	vCM2	Two-sided Wilcoxon test	0.25	25
0.000101073	0.381465	0.697	0.77	1	1	Cct2	vCM2	Two-sided Wilcoxon test	0.25	25
1.30576e-06	0.380977	0.858	0.913	0.0306645	1	Hnrnpa2b1	vCM2	Two-sided Wilcoxon test	0.25	25
0.00116916	0.37932	0.657	0.699	1	1	Eid1	vCM2	Two-sided Wilcoxon test	0.25	25
1.26396e-11	0.375118	0.949	0.92	2.96829e-07	1	Myh6	vCM2	Two-sided Wilcoxon test	0.25	25
0.000994662	0.37381	0.613	0.652	1	1	Atp6v0c	vCM2	Two-sided Wilcoxon test	0.25	25
0.00172228	0.369206	0.639	0.72	1	1	U2af1	vCM2	Two-sided Wilcoxon test	0.25	25
0.00184682	0.36792	0.693	0.798	1	1	Eif2s2	vCM2	Two-sided Wilcoxon test	0.25	25
0.00679982	0.367909	0.639	0.703	1	1	Abracl	vCM2	Two-sided Wilcoxon test	0.25	25
4.55953e-05	0.367075	0.668	0.72	1	1	Prmt1	vCM2	Two-sided Wilcoxon test	0.25	25
0.000509655	0.364771	0.642	0.72	1	1	Pebp1	vCM2	Two-sided Wilcoxon test	0.25	25
1.15718e-06	0.363031	1	0.993	0.0271753	1	mt-Cytb	vCM2	Two-sided Wilcoxon test	0.25	25
0.00073917	0.359787	0.646	0.719	1	1	Pabpc1	vCM2	Two-sided Wilcoxon test	0.25	25
0.00801854	0.35966	0.569	0.634	1	1	Pomp	vCM2	Two-sided Wilcoxon test	0.25	25
0.00433405	0.359026	0.62	0.719	1	1	Arf1	vCM2	Two-sided Wilcoxon test	0.25	25
8.02017e-09	0.355482	0.942	0.952	0.000188346	1	H3f3a	vCM2	Two-sided Wilcoxon test	0.25	25
0.00824975	0.3455	0.69	0.804	1	1	Eif3a	vCM2	Two-sided Wilcoxon test	0.25	25
3.51119e-09	0.344405	0.964	0.966	8.24568e-05	1	Rpl6	vCM2	Two-sided Wilcoxon test	0.25	25
1.52946e-13	0.343428	1	0.994	3.59179e-09	1	Rpl13	vCM2	Two-sided Wilcoxon test	0.25	25
0.000644991	0.337836	0.854	0.848	1	1	Hsp90b1	vCM2	Two-sided Wilcoxon test	0.25	25
6.13318e-05	0.337606	0.566	0.55	1	1	Myl1	vCM2	Two-sided Wilcoxon test	0.25	25
5.18365e-07	0.331688	0.843	0.864	0.0121733	1	Igf2	vCM2	Two-sided Wilcoxon test	0.25	25
8.30248e-05	0.331118	0.774	0.838	1	1	Dstn	vCM2	Two-sided Wilcoxon test	0.25	25
0.00540359	0.330011	0.704	0.786	1	1	Tpr	vCM2	Two-sided Wilcoxon test	0.25	25
2.74576e-05	0.329828	0.799	0.831	0.644814	1	Prdx2	vCM2	Two-sided Wilcoxon test	0.25	25
0.00828005	0.327046	0.613	0.697	1	1	Chchd10	vCM2	Two-sided Wilcoxon test	0.25	25
2.07108e-13	0.326147	0.964	0.961	4.86372e-09	1	Hbb-bh1	vCM2	Two-sided Wilcoxon test	0.25	25
0.00467342	0.325834	0.664	0.756	1	1	Rtn4	vCM2	Two-sided Wilcoxon test	0.25	25
2.10136e-09	0.318905	0.912	0.91	4.93483e-05	1	Ldha	vCM2	Two-sided Wilcoxon test	0.25	25
2.57139e-06	0.315164	0.938	0.966	0.0603865	1	Rpl3	vCM2	Two-sided Wilcoxon test	0.25	25
0.00400926	0.313301	0.646	0.683	1	1	Cst3	vCM2	Two-sided Wilcoxon test	0.25	25
0.000527689	0.305212	0.777	0.828	1	1	Atp5h	vCM2	Two-sided Wilcoxon test	0.25	25
0.000309488	0.298934	0.996	0.991	1	1	mt-Nd1	vCM2	Two-sided Wilcoxon test	0.25	25
0.00135125	0.295674	0.858	0.849	1	1	Vcan	vCM2	Two-sided Wilcoxon test	0.25	25
0.000930337	0.294954	0.763	0.849	1	1	Ywhae	vCM2	Two-sided Wilcoxon test	0.25	25
7.05813e-05	0.293022	1	0.998	1	1	mt-Co3	vCM2	Two-sided Wilcoxon test	0.25	25
6.50262e-08	0.29197	0.956	0.962	0.00152708	1	Ftl1	vCM2	Two-sided Wilcoxon test	0.25	25
4.66182e-05	0.2915	1	0.994	1	1	mt-Nd2	vCM2	Two-sided Wilcoxon test	0.25	25
3.3047e-06	0.288771	0.865	0.87	0.0776075	1	Rpl10	vCM2	Two-sided Wilcoxon test	0.25	25
1.96398e-06	0.282402	0.912	0.945	0.0461221	1	Naca	vCM2	Two-sided Wilcoxon test	0.25	25
0.00471911	0.279397	0.708	0.792	1	1	Serpinh1	vCM2	Two-sided Wilcoxon test	0.25	25
0.000133416	0.278496	1	0.999	1	1	mt-Co2	vCM2	Two-sided Wilcoxon test	0.25	25
0.00226707	0.271827	0.748	0.803	1	1	Tceal9	vCM2	Two-sided Wilcoxon test	0.25	25
6.86358e-07	0.271209	0.974	0.972	0.0161184	1	Rpl11	vCM2	Two-sided Wilcoxon test	0.25	25
2.7684e-06	0.271	0.996	1	0.0650131	1	Tpm1	vCM2	Two-sided Wilcoxon test	0.25	25
0.00294261	0.268677	0.748	0.798	1	1	Ppp1r14b	vCM2	Two-sided Wilcoxon test	0.25	25
3.41209e-07	0.259365	0.967	0.976	0.00801296	1	Rpl18a	vCM2	Two-sided Wilcoxon test	0.25	25
9.28849e-09	0.258775	0.978	0.973	0.000218131	1	Rpsa	vCM2	Two-sided Wilcoxon test	0.25	25
0.00506247	0.257256	0.704	0.738	1	1	Hspe1	vCM2	Two-sided Wilcoxon test	0.25	25
0.00117644	0.252596	0.88	0.91	1	1	Oaz1	vCM2	Two-sided Wilcoxon test	0.25	25
4.66335e-59	2.06489	0.854	0.371	1.09514e-54	2	Cenpf	pvCM1	Two-sided Wilcoxon test	0.25	25
3.96839e-51	1.92861	0.865	0.473	9.31936e-47	2	Top2a	pvCM1	Two-sided Wilcoxon test	0.25	25
7.60815e-31	1.47817	0.789	0.51	1.7867e-26	2	Ube2c	pvCM1	Two-sided Wilcoxon test	0.25	25
1.95838e-37	1.46943	0.678	0.301	4.59905e-33	2	Prc1	pvCM1	Two-sided Wilcoxon test	0.25	25
1.03847e-36	1.43148	0.784	0.472	2.43875e-32	2	Smc2	pvCM1	Two-sided Wilcoxon test	0.25	25
2.96359e-52	1.42414	0.971	0.792	6.9597e-48	2	Hmgb2	pvCM1	Two-sided Wilcoxon test	0.25	25
1.73333e-30	1.26909	0.795	0.535	4.07056e-26	2	Cks2	pvCM1	Two-sided Wilcoxon test	0.25	25
1.91805e-30	1.26077	0.737	0.391	4.50434e-26	2	Mki67	pvCM1	Two-sided Wilcoxon test	0.25	25
2.11353e-33	1.20871	0.637	0.259	4.96341e-29	2	Cenpe	pvCM1	Two-sided Wilcoxon test	0.25	25
1.2828e-30	1.14518	0.713	0.372	3.01254e-26	2	Cdca8	pvCM1	Two-sided Wilcoxon test	0.25	25
3.29802e-20	1.1299	0.468	0.208	7.74506e-16	2	Aspm	pvCM1	Two-sided Wilcoxon test	0.25	25
3.60584e-28	1.12724	0.485	0.18	8.46796e-24	2	Sgo2a	pvCM1	Two-sided Wilcoxon test	0.25	25
6.97192e-20	1.12475	0.749	0.57	1.63729e-15	2	Arl6ip1	pvCM1	Two-sided Wilcoxon test	0.25	25
2.8991e-23	1.09335	0.614	0.342	6.80825e-19	2	Cdk1	pvCM1	Two-sided Wilcoxon test	0.25	25
4.08004e-30	1.02555	0.977	0.897	9.58156e-26	2	Hspd1	pvCM1	Two-sided Wilcoxon test	0.25	25
7.04938e-31	0.999941	1	0.973	1.65548e-26	2	Ttn	pvCM1	Two-sided Wilcoxon test	0.25	25
4.12236e-19	0.984552	0.515	0.267	9.68094e-15	2	Ccnb1	pvCM1	Two-sided Wilcoxon test	0.25	25
8.26533e-18	0.984326	0.532	0.272	1.94103e-13	2	Kif11	pvCM1	Two-sided Wilcoxon test	0.25	25
2.61179e-17	0.98159	0.48	0.247	6.13352e-13	2	Bub1	pvCM1	Two-sided Wilcoxon test	0.25	25
5.7404e-37	0.963382	0.994	0.943	1.34807e-32	2	Tubb5	pvCM1	Two-sided Wilcoxon test	0.25	25
3.97622e-26	0.958831	0.942	0.859	9.33775e-22	2	Myh7	pvCM1	Two-sided Wilcoxon test	0.25	25
1.62093e-18	0.958561	0.749	0.575	3.80658e-14	2	Tubb4b	pvCM1	Two-sided Wilcoxon test	0.25	25
6.81459e-16	0.952618	0.357	0.15	1.60034e-11	2	Aurka	pvCM1	Two-sided Wilcoxon test	0.25	25
4.58035e-18	0.94835	0.713	0.487	1.07565e-13	2	Smc4	pvCM1	Two-sided Wilcoxon test	0.25	25
6.60709e-21	0.947388	0.526	0.26	1.55161e-16	2	Bub1b	pvCM1	Two-sided Wilcoxon test	0.25	25
3.79688e-17	0.938443	0.532	0.283	8.9166e-13	2	Hmmr	pvCM1	Two-sided Wilcoxon test	0.25	25
1.28169e-16	0.929009	0.737	0.587	3.00993e-12	2	Ckap5	pvCM1	Two-sided Wilcoxon test	0.25	25
5.50622e-15	0.907895	0.573	0.386	1.29308e-10	2	Rangap1	pvCM1	Two-sided Wilcoxon test	0.25	25
2.95154e-29	0.907136	0.977	0.93	6.93139e-25	2	Hsp90aa1	pvCM1	Two-sided Wilcoxon test	0.25	25
1.45451e-18	0.904613	0.62	0.383	3.41577e-14	2	Birc5	pvCM1	Two-sided Wilcoxon test	0.25	25
1.58513e-17	0.886216	0.444	0.209	3.72251e-13	2	Kif23	pvCM1	Two-sided Wilcoxon test	0.25	25
9.67352e-12	0.885036	0.561	0.411	2.27173e-07	2	Gmnn	pvCM1	Two-sided Wilcoxon test	0.25	25
1.17947e-19	0.877416	0.789	0.645	2.76986e-15	2	Nucks1	pvCM1	Two-sided Wilcoxon test	0.25	25
3.7543e-10	0.861205	0.573	0.464	8.8166e-06	2	Dnmt1	pvCM1	Two-sided Wilcoxon test	0.25	25
1.65086e-20	0.855567	0.854	0.754	3.87689e-16	2	Cbx5	pvCM1	Two-sided Wilcoxon test	0.25	25
1.11992e-10	0.833746	0.637	0.532	2.63003e-06	2	Hist1h1e	pvCM1	Two-sided Wilcoxon test	0.25	25
3.6244e-13	0.824337	0.409	0.206	8.51155e-09	2	Cdc20	pvCM1	Two-sided Wilcoxon test	0.25	25
8.3505e-10	0.806652	0.678	0.597	1.96103e-05	2	Ahnak	pvCM1	Two-sided Wilcoxon test	0.25	25
2.69164e-23	0.80581	0.947	0.871	6.32104e-19	2	Hmgb1	pvCM1	Two-sided Wilcoxon test	0.25	25
2.36414e-07	0.804834	0.497	0.385	0.00555194	2	Pclaf	pvCM1	Two-sided Wilcoxon test	0.25	25
5.67598e-09	0.799372	0.491	0.355	0.000133295	2	Lig1	pvCM1	Two-sided Wilcoxon test	0.25	25
3.92262e-13	0.797488	0.474	0.277	9.21188e-09	2	Tpx2	pvCM1	Two-sided Wilcoxon test	0.25	25
2.27256e-09	0.792952	0.409	0.254	5.33689e-05	2	Knl1	pvCM1	Two-sided Wilcoxon test	0.25	25
2.74969e-14	0.791524	0.731	0.657	6.45736e-10	2	Sf3b2	pvCM1	Two-sided Wilcoxon test	0.25	25
2.36526e-09	0.777043	0.45	0.299	5.55457e-05	2	Rrm2	pvCM1	Two-sided Wilcoxon test	0.25	25
2.40419e-09	0.776913	0.415	0.265	5.64599e-05	2	Fignl1	pvCM1	Two-sided Wilcoxon test	0.25	25
3.96976e-18	0.772192	0.807	0.684	9.32259e-14	2	G3bp1	pvCM1	Two-sided Wilcoxon test	0.25	25
1.31611e-10	0.770169	0.55	0.399	3.09075e-06	2	H2afx	pvCM1	Two-sided Wilcoxon test	0.25	25
8.80613e-15	0.764641	0.737	0.615	2.06803e-10	2	Kpnb1	pvCM1	Two-sided Wilcoxon test	0.25	25
8.02536e-14	0.764032	0.357	0.159	1.88468e-09	2	Plk1	pvCM1	Two-sided Wilcoxon test	0.25	25
1.31005e-25	0.754665	0.994	0.944	3.07652e-21	2	Hspa8	pvCM1	Two-sided Wilcoxon test	0.25	25
2.94171e-21	0.751872	0.977	0.879	6.90831e-17	2	Tpi1	pvCM1	Two-sided Wilcoxon test	0.25	25
3.74742e-10	0.745245	0.415	0.249	8.80044e-06	2	Anln	pvCM1	Two-sided Wilcoxon test	0.25	25
3.69416e-09	0.744209	0.339	0.19	8.67537e-05	2	Dlgap5	pvCM1	Two-sided Wilcoxon test	0.25	25
1.06705e-07	0.744172	0.421	0.306	0.00250585	2	Cdkn2d	pvCM1	Two-sided Wilcoxon test	0.25	25
1.35002e-11	0.730494	0.427	0.249	3.17038e-07	2	Ccna2	pvCM1	Two-sided Wilcoxon test	0.25	25
2.05735e-12	0.730074	0.684	0.568	4.83149e-08	2	Cks1b	pvCM1	Two-sided Wilcoxon test	0.25	25
1.82489e-14	0.719611	0.883	0.804	4.28558e-10	2	Hnrnpf	pvCM1	Two-sided Wilcoxon test	0.25	25
7.82496e-10	0.699064	0.55	0.42	1.83761e-05	2	Rrm1	pvCM1	Two-sided Wilcoxon test	0.25	25
4.30254e-21	0.698536	0.953	0.872	1.01041e-16	2	Mybpc3	pvCM1	Two-sided Wilcoxon test	0.25	25
2.24242e-29	0.695676	1	0.955	5.26611e-25	2	Nedd4	pvCM1	Two-sided Wilcoxon test	0.25	25
1.04588e-09	0.694916	0.444	0.283	2.45614e-05	2	Racgap1	pvCM1	Two-sided Wilcoxon test	0.25	25
2.57327e-10	0.691455	0.333	0.17	6.04306e-06	2	Gas2l3	pvCM1	Two-sided Wilcoxon test	0.25	25
1.77468e-07	0.686632	0.544	0.464	0.00416765	2	Klhl9	pvCM1	Two-sided Wilcoxon test	0.25	25
2.98568e-13	0.685189	0.754	0.641	7.01157e-09	2	Ndufv1	pvCM1	Two-sided Wilcoxon test	0.25	25
4.71083e-13	0.682773	0.749	0.65	1.10629e-08	2	Pfkl	pvCM1	Two-sided Wilcoxon test	0.25	25
4.70488e-11	0.678323	0.795	0.709	1.10489e-06	2	Immt	pvCM1	Two-sided Wilcoxon test	0.25	25
1.99251e-14	0.667675	0.316	0.122	4.6792e-10	2	Kif2c	pvCM1	Two-sided Wilcoxon test	0.25	25
4.08014e-09	0.665249	0.696	0.621	9.58181e-05	2	Ywhah	pvCM1	Two-sided Wilcoxon test	0.25	25
1.36539e-12	0.658464	0.86	0.796	3.20649e-08	2	Hspa9	pvCM1	Two-sided Wilcoxon test	0.25	25
2.27373e-10	0.658207	0.386	0.212	5.33962e-06	2	Nusap1	pvCM1	Two-sided Wilcoxon test	0.25	25
1.167e-11	0.657161	0.737	0.619	2.74058e-07	2	Got1	pvCM1	Two-sided Wilcoxon test	0.25	25
2.72076e-13	0.655182	0.836	0.768	6.38944e-09	2	Ssb	pvCM1	Two-sided Wilcoxon test	0.25	25
0.00114552	0.653584	0.439	0.407	1	2	Pcna	pvCM1	Two-sided Wilcoxon test	0.25	25
3.07561e-05	0.648619	0.526	0.49	0.722277	2	Parp1	pvCM1	Two-sided Wilcoxon test	0.25	25
1.2521e-07	0.646092	0.292	0.157	0.00294044	2	Esco2	pvCM1	Two-sided Wilcoxon test	0.25	25
5.76776e-11	0.645412	0.83	0.772	1.3545e-06	2	Eif5	pvCM1	Two-sided Wilcoxon test	0.25	25
1.67043e-16	0.643956	0.942	0.865	3.92284e-12	2	Pgk1	pvCM1	Two-sided Wilcoxon test	0.25	25
3.64364e-11	0.643487	0.719	0.617	8.55672e-07	2	Dek	pvCM1	Two-sided Wilcoxon test	0.25	25
1.79204e-08	0.64303	0.69	0.618	0.000420843	2	Nudc	pvCM1	Two-sided Wilcoxon test	0.25	25
3.5077e-21	0.640096	0.982	0.924	8.23749e-17	2	Atp5a1	pvCM1	Two-sided Wilcoxon test	0.25	25
1.19187e-06	0.636413	0.48	0.381	0.0279899	2	Timm8a1	pvCM1	Two-sided Wilcoxon test	0.25	25
7.16082e-13	0.633928	0.813	0.709	1.68165e-08	2	Hnrnpab	pvCM1	Two-sided Wilcoxon test	0.25	25
6.68906e-16	0.632263	0.912	0.837	1.57086e-11	2	Vcp	pvCM1	Two-sided Wilcoxon test	0.25	25
7.02095e-09	0.630973	0.415	0.266	0.00016488	2	Ncapd2	pvCM1	Two-sided Wilcoxon test	0.25	25
4.12147e-10	0.630435	0.345	0.182	9.67886e-06	2	Incenp	pvCM1	Two-sided Wilcoxon test	0.25	25
1.37568e-17	0.629041	0.965	0.881	3.23065e-13	2	Pgam1	pvCM1	Two-sided Wilcoxon test	0.25	25
7.20604e-12	0.626763	0.813	0.775	1.69227e-07	2	Calm2	pvCM1	Two-sided Wilcoxon test	0.25	25
7.95982e-08	0.620386	0.269	0.139	0.00186928	2	Pimreg	pvCM1	Two-sided Wilcoxon test	0.25	25
3.72894e-10	0.61329	0.807	0.766	8.75704e-06	2	Tpr	pvCM1	Two-sided Wilcoxon test	0.25	25
1.85965e-15	0.602829	0.906	0.828	4.36721e-11	2	Hnrnpu	pvCM1	Two-sided Wilcoxon test	0.25	25
1.23274e-07	0.602309	0.427	0.278	0.00289496	2	Kif4	pvCM1	Two-sided Wilcoxon test	0.25	25
1.68889e-09	0.597217	0.333	0.175	3.96619e-05	2	Kif22	pvCM1	Two-sided Wilcoxon test	0.25	25
0.000343424	0.59537	0.515	0.521	1	2	Lars	pvCM1	Two-sided Wilcoxon test	0.25	25
1.50979e-06	0.592565	0.55	0.452	0.0354559	2	Hist1h2ap	pvCM1	Two-sided Wilcoxon test	0.25	25
2.54597e-12	0.592255	0.918	0.816	5.97896e-08	2	Crip2	pvCM1	Two-sided Wilcoxon test	0.25	25
3.86557e-05	0.592043	0.456	0.387	0.90779	2	Bub3	pvCM1	Two-sided Wilcoxon test	0.25	25
4.38053e-06	0.590202	0.509	0.447	0.102872	2	Esf1	pvCM1	Two-sided Wilcoxon test	0.25	25
4.42122e-08	0.588873	0.678	0.587	0.00103828	2	Anp32e	pvCM1	Two-sided Wilcoxon test	0.25	25
3.73427e-10	0.588571	0.725	0.603	8.76955e-06	2	Ube2s	pvCM1	Two-sided Wilcoxon test	0.25	25
6.45788e-07	0.588154	0.281	0.157	0.0151657	2	Kpna2	pvCM1	Two-sided Wilcoxon test	0.25	25
3.91183e-05	0.586229	0.591	0.543	0.918655	2	Hmgcs1	pvCM1	Two-sided Wilcoxon test	0.25	25
2.07864e-16	0.586136	0.988	0.932	4.88148e-12	2	H2afz	pvCM1	Two-sided Wilcoxon test	0.25	25
0.00123782	0.585179	0.462	0.435	1	2	Plec	pvCM1	Two-sided Wilcoxon test	0.25	25
1.6367e-12	0.579584	0.947	0.901	3.84363e-08	2	Eif4a1	pvCM1	Two-sided Wilcoxon test	0.25	25
5.45571e-07	0.57923	0.661	0.624	0.0128122	2	Lmnb1	pvCM1	Two-sided Wilcoxon test	0.25	25
8.08235e-08	0.574721	0.784	0.737	0.00189806	2	Nap1l1	pvCM1	Two-sided Wilcoxon test	0.25	25
5.69323e-05	0.570295	0.485	0.436	1	2	Lsm2	pvCM1	Two-sided Wilcoxon test	0.25	25
1.03097e-07	0.567557	0.69	0.662	0.00242112	2	Tln1	pvCM1	Two-sided Wilcoxon test	0.25	25
1.70518e-08	0.56732	0.778	0.74	0.000400444	2	Unc45b	pvCM1	Two-sided Wilcoxon test	0.25	25
5.22045e-09	0.56332	0.696	0.66	0.000122597	2	Ndufs1	pvCM1	Two-sided Wilcoxon test	0.25	25
4.06473e-09	0.561222	0.737	0.677	9.54562e-05	2	Cct7	pvCM1	Two-sided Wilcoxon test	0.25	25
0.000485447	0.560836	0.462	0.428	1	2	Mphosph8	pvCM1	Two-sided Wilcoxon test	0.25	25
9.45333e-06	0.560423	0.608	0.56	0.222002	2	Rnps1	pvCM1	Two-sided Wilcoxon test	0.25	25
3.76605e-12	0.558437	0.977	0.89	8.8442e-08	2	Hspb1	pvCM1	Two-sided Wilcoxon test	0.25	25
0.000700642	0.557427	0.474	0.464	1	2	Hdac2	pvCM1	Two-sided Wilcoxon test	0.25	25
6.28913e-07	0.553877	0.655	0.59	0.0147694	2	Dut	pvCM1	Two-sided Wilcoxon test	0.25	25
8.23427e-08	0.553375	0.848	0.864	0.00193374	2	Camk1d	pvCM1	Two-sided Wilcoxon test	0.25	25
1.05142e-07	0.552814	0.632	0.541	0.00246916	2	Jpt1	pvCM1	Two-sided Wilcoxon test	0.25	25
4.48362e-07	0.552234	0.345	0.218	0.0105293	2	Tacc3	pvCM1	Two-sided Wilcoxon test	0.25	25
1.41136e-06	0.551658	0.298	0.178	0.0331443	2	Arhgap11a	pvCM1	Two-sided Wilcoxon test	0.25	25
0.00344192	0.549991	0.339	0.292	1	2	Haus8	pvCM1	Two-sided Wilcoxon test	0.25	25
4.40734e-07	0.547441	0.62	0.565	0.0103502	2	Psmc5	pvCM1	Two-sided Wilcoxon test	0.25	25
5.11776e-07	0.54738	0.269	0.148	0.0120186	2	Kif20a	pvCM1	Two-sided Wilcoxon test	0.25	25
1.02481e-05	0.546689	0.392	0.296	0.240667	2	Rfc4	pvCM1	Two-sided Wilcoxon test	0.25	25
4.51687e-07	0.546143	0.702	0.67	0.0106074	2	Sdha	pvCM1	Two-sided Wilcoxon test	0.25	25
0.00212646	0.544719	0.333	0.275	1	2	Mdc1	pvCM1	Two-sided Wilcoxon test	0.25	25
1.33002e-05	0.544383	0.649	0.615	0.312341	2	Ddx6	pvCM1	Two-sided Wilcoxon test	0.25	25
1.0164e-10	0.543067	0.825	0.784	2.38691e-06	2	Sf3b1	pvCM1	Two-sided Wilcoxon test	0.25	25
2.70758e-05	0.540527	0.737	0.731	0.635849	2	Manf	pvCM1	Two-sided Wilcoxon test	0.25	25
1.40955e-06	0.540124	0.696	0.664	0.033102	2	Srsf2	pvCM1	Two-sided Wilcoxon test	0.25	25
4.6863e-10	0.540061	0.877	0.811	1.10053e-05	2	Mdh2	pvCM1	Two-sided Wilcoxon test	0.25	25
1.65e-07	0.538234	0.678	0.629	0.00387486	2	Supt16	pvCM1	Two-sided Wilcoxon test	0.25	25
8.95544e-17	0.537698	0.994	0.977	2.1031e-12	2	Tnnt2	pvCM1	Two-sided Wilcoxon test	0.25	25
1.20252e-07	0.535748	0.696	0.647	0.00282399	2	Hnrnpa0	pvCM1	Two-sided Wilcoxon test	0.25	25
0.000989694	0.535419	0.351	0.293	1	2	Lbr	pvCM1	Two-sided Wilcoxon test	0.25	25
1.1798e-09	0.535201	0.836	0.778	2.77064e-05	2	Hnrnpa1	pvCM1	Two-sided Wilcoxon test	0.25	25
3.90874e-08	0.534841	0.749	0.655	0.000917927	2	Hmgn2	pvCM1	Two-sided Wilcoxon test	0.25	25
2.02458e-05	0.533145	0.327	0.226	0.475453	2	Trip13	pvCM1	Two-sided Wilcoxon test	0.25	25
1.68516e-05	0.526728	0.48	0.407	0.395743	2	Ubtf	pvCM1	Two-sided Wilcoxon test	0.25	25
4.58312e-13	0.526641	0.971	0.916	1.0763e-08	2	Myl3	pvCM1	Two-sided Wilcoxon test	0.25	25
0.000151178	0.524887	0.591	0.576	1	2	Gspt1	pvCM1	Two-sided Wilcoxon test	0.25	25
1.94742e-10	0.524856	0.901	0.876	4.57332e-06	2	Ncl	pvCM1	Two-sided Wilcoxon test	0.25	25
0.000194328	0.524448	0.474	0.427	1	2	Ciapin1	pvCM1	Two-sided Wilcoxon test	0.25	25
9.42029e-09	0.524053	0.731	0.655	0.000221226	2	Nono	pvCM1	Two-sided Wilcoxon test	0.25	25
5.54548e-05	0.521837	0.596	0.568	1	2	Suz12	pvCM1	Two-sided Wilcoxon test	0.25	25
2.99172e-10	0.520355	0.836	0.828	7.02575e-06	2	Hnrnpa3	pvCM1	Two-sided Wilcoxon test	0.25	25
1.88254e-09	0.516665	0.795	0.728	4.42095e-05	2	Cyc1	pvCM1	Two-sided Wilcoxon test	0.25	25
0.000221009	0.516074	0.392	0.298	1	2	Ect2	pvCM1	Two-sided Wilcoxon test	0.25	25
1.23072e-12	0.514694	0.942	0.898	2.89023e-08	2	Hnrnpa2b1	pvCM1	Two-sided Wilcoxon test	0.25	25
1.62618e-16	0.512126	1	0.988	3.81893e-12	2	Hsp90ab1	pvCM1	Two-sided Wilcoxon test	0.25	25
1.3953e-05	0.511258	0.52	0.458	0.327671	2	Ddx39	pvCM1	Two-sided Wilcoxon test	0.25	25
0.000118219	0.511149	0.591	0.575	1	2	Psma1	pvCM1	Two-sided Wilcoxon test	0.25	25
1.92529e-14	0.51077	0.988	0.977	4.52135e-10	2	Cmss1	pvCM1	Two-sided Wilcoxon test	0.25	25
0.000178848	0.510209	0.462	0.411	1	2	Pgp	pvCM1	Two-sided Wilcoxon test	0.25	25
6.70737e-12	0.509012	0.947	0.926	1.57516e-07	2	Pkm	pvCM1	Two-sided Wilcoxon test	0.25	25
0.00106494	0.506836	0.637	0.675	1	2	Hectd1	pvCM1	Two-sided Wilcoxon test	0.25	25
1.15631e-05	0.506565	0.596	0.563	0.271547	2	Cdc37	pvCM1	Two-sided Wilcoxon test	0.25	25
0.000200405	0.50655	0.55	0.51	1	2	Rad21	pvCM1	Two-sided Wilcoxon test	0.25	25
9.82885e-06	0.505335	0.614	0.561	0.230821	2	Cetn3	pvCM1	Two-sided Wilcoxon test	0.25	25
8.4807e-07	0.501047	0.649	0.613	0.0199161	2	Psmd2	pvCM1	Two-sided Wilcoxon test	0.25	25
4.71073e-05	0.500149	0.561	0.529	1	2	Coq7	pvCM1	Two-sided Wilcoxon test	0.25	25
0.00354901	0.499984	0.327	0.278	1	2	Trim59	pvCM1	Two-sided Wilcoxon test	0.25	25
1.15226e-05	0.499063	0.316	0.205	0.270597	2	Melk	pvCM1	Two-sided Wilcoxon test	0.25	25
9.15223e-09	0.497008	0.789	0.71	0.000214931	2	Flnc	pvCM1	Two-sided Wilcoxon test	0.25	25
0.000804445	0.496805	0.509	0.492	1	2	Hat1	pvCM1	Two-sided Wilcoxon test	0.25	25
6.4809e-06	0.496766	0.731	0.719	0.152198	2	Dsp	pvCM1	Two-sided Wilcoxon test	0.25	25
9.96498e-05	0.495944	0.632	0.625	1	2	Tmed9	pvCM1	Two-sided Wilcoxon test	0.25	25
4.43602e-06	0.495913	0.561	0.497	0.104175	2	Dicer1	pvCM1	Two-sided Wilcoxon test	0.25	25
0.000437185	0.495871	0.287	0.201	1	2	Shcbp1	pvCM1	Two-sided Wilcoxon test	0.25	25
0.000315677	0.495068	0.497	0.453	1	2	Lsm3	pvCM1	Two-sided Wilcoxon test	0.25	25
6.57688e-05	0.494252	0.953	0.922	1	2	Myh6	pvCM1	Two-sided Wilcoxon test	0.25	25
0.00174867	0.493666	0.386	0.335	1	2	Prrc2a	pvCM1	Two-sided Wilcoxon test	0.25	25
0.00239869	0.493407	0.456	0.443	1	2	Safb	pvCM1	Two-sided Wilcoxon test	0.25	25
2.63375e-05	0.493242	0.263	0.161	0.61851	2	Fbxo5	pvCM1	Two-sided Wilcoxon test	0.25	25
0.000353273	0.492609	0.538	0.513	1	2	Fbl	pvCM1	Two-sided Wilcoxon test	0.25	25
0.000441302	0.490846	0.398	0.321	1	2	Aldh1b1	pvCM1	Two-sided Wilcoxon test	0.25	25
0.000148868	0.489368	0.485	0.446	1	2	Spag7	pvCM1	Two-sided Wilcoxon test	0.25	25
1.81399e-09	0.487762	0.854	0.806	4.25997e-05	2	Mdh1	pvCM1	Two-sided Wilcoxon test	0.25	25
1.92877e-05	0.486125	0.556	0.465	0.452952	2	Hist1h1b	pvCM1	Two-sided Wilcoxon test	0.25	25
7.76594e-10	0.485242	0.854	0.78	1.82375e-05	2	Anp32b	pvCM1	Two-sided Wilcoxon test	0.25	25
1.92091e-07	0.483237	0.749	0.691	0.00451108	2	Eif4ebp1	pvCM1	Two-sided Wilcoxon test	0.25	25
0.00141962	0.483227	0.515	0.528	1	2	Pdhb	pvCM1	Two-sided Wilcoxon test	0.25	25
4.97381e-07	0.482966	0.678	0.609	0.0116805	2	Suclg1	pvCM1	Two-sided Wilcoxon test	0.25	25
1.04302e-05	0.482668	0.643	0.625	0.244943	2	Spcs2	pvCM1	Two-sided Wilcoxon test	0.25	25
4.79593e-06	0.482517	0.813	0.827	0.112628	2	Myh10	pvCM1	Two-sided Wilcoxon test	0.25	25
3.4534e-06	0.480256	0.655	0.611	0.0810997	2	Stip1	pvCM1	Two-sided Wilcoxon test	0.25	25
1.19114e-05	0.479915	0.608	0.573	0.279728	2	Bcas2	pvCM1	Two-sided Wilcoxon test	0.25	25
2.16105e-05	0.479844	0.591	0.577	0.507501	2	Ddb1	pvCM1	Two-sided Wilcoxon test	0.25	25
0.00137374	0.477265	0.433	0.394	1	2	Prelid3b	pvCM1	Two-sided Wilcoxon test	0.25	25
1.0513e-09	0.477132	0.819	0.697	2.46886e-05	2	Prmt1	pvCM1	Two-sided Wilcoxon test	0.25	25
2.70401e-08	0.476267	0.772	0.737	0.00063501	2	Hnrnpd	pvCM1	Two-sided Wilcoxon test	0.25	25
0.000731551	0.476079	0.579	0.585	1	2	Psmd12	pvCM1	Two-sided Wilcoxon test	0.25	25
0.00164002	0.476048	0.439	0.403	1	2	Lsm8	pvCM1	Two-sided Wilcoxon test	0.25	25
6.73649e-05	0.475793	0.287	0.19	1	2	Spc25	pvCM1	Two-sided Wilcoxon test	0.25	25
2.2846e-09	0.475641	0.784	0.725	5.36517e-05	2	Cct3	pvCM1	Two-sided Wilcoxon test	0.25	25
4.0131e-08	0.474655	0.813	0.777	0.000942437	2	Hnrnpm	pvCM1	Two-sided Wilcoxon test	0.25	25
0.002423	0.473804	0.509	0.511	1	2	Abcf1	pvCM1	Two-sided Wilcoxon test	0.25	25
0.0024984	0.470354	0.392	0.347	1	2	Dnajc9	pvCM1	Two-sided Wilcoxon test	0.25	25
0.00293442	0.46968	0.544	0.554	1	2	Smc1a	pvCM1	Two-sided Wilcoxon test	0.25	25
5.18775e-11	0.46892	0.924	0.842	1.21829e-06	2	Sub1	pvCM1	Two-sided Wilcoxon test	0.25	25
7.0899e-05	0.468712	0.614	0.586	1	2	Psmd7	pvCM1	Two-sided Wilcoxon test	0.25	25
0.00492699	0.467442	0.509	0.519	1	2	Ipo5	pvCM1	Two-sided Wilcoxon test	0.25	25
4.47367e-07	0.466872	0.766	0.744	0.010506	2	Ubc	pvCM1	Two-sided Wilcoxon test	0.25	25
1.74695e-06	0.465998	0.754	0.651	0.0410255	2	Pln	pvCM1	Two-sided Wilcoxon test	0.25	25
2.37871e-08	0.464701	0.83	0.756	0.000558616	2	Stmn1	pvCM1	Two-sided Wilcoxon test	0.25	25
6.03892e-12	0.463884	0.971	0.933	1.41818e-07	2	Atp5b	pvCM1	Two-sided Wilcoxon test	0.25	25
1.06443e-06	0.461966	0.865	0.837	0.024997	2	Ddx5	pvCM1	Two-sided Wilcoxon test	0.25	25
4.24215e-08	0.461863	0.807	0.753	0.000996227	2	Ranbp1	pvCM1	Two-sided Wilcoxon test	0.25	25
0.00149441	0.461678	0.298	0.235	1	2	Fzr1	pvCM1	Two-sided Wilcoxon test	0.25	25
2.57154e-05	0.461138	0.643	0.611	0.6039	2	Polr2m	pvCM1	Two-sided Wilcoxon test	0.25	25
0.0025429	0.458315	0.491	0.49	1	2	Rars	pvCM1	Two-sided Wilcoxon test	0.25	25
1.39767e-07	0.458145	0.778	0.717	0.00328228	2	Dbi	pvCM1	Two-sided Wilcoxon test	0.25	25
4.5894e-11	0.457805	0.977	0.951	1.07778e-06	2	Npm1	pvCM1	Two-sided Wilcoxon test	0.25	25
0.00972402	0.45686	0.345	0.311	1	2	Exosc8	pvCM1	Two-sided Wilcoxon test	0.25	25
0.000881363	0.456696	0.485	0.455	1	2	Topbp1	pvCM1	Two-sided Wilcoxon test	0.25	25
3.41723e-06	0.456484	0.655	0.626	0.0802503	2	Zfp106	pvCM1	Two-sided Wilcoxon test	0.25	25
1.96712e-13	0.45317	0.994	0.945	4.61959e-09	2	Slc25a4	pvCM1	Two-sided Wilcoxon test	0.25	25
7.29538e-05	0.452342	0.673	0.685	1	2	Eif3c	pvCM1	Two-sided Wilcoxon test	0.25	25
9.55827e-11	0.452209	0.953	0.923	2.24467e-06	2	Nebl	pvCM1	Two-sided Wilcoxon test	0.25	25
7.05294e-05	0.450609	0.556	0.493	1	2	Hmgb3	pvCM1	Two-sided Wilcoxon test	0.25	25
2.6353e-05	0.450578	0.585	0.539	0.618873	2	Lsm6	pvCM1	Two-sided Wilcoxon test	0.25	25
1.23515e-08	0.449606	0.877	0.843	0.000290063	2	Srsf3	pvCM1	Two-sided Wilcoxon test	0.25	25
2.65351e-14	0.449559	1	1	6.23151e-10	2	AY036118	pvCM1	Two-sided Wilcoxon test	0.25	25
2.92841e-05	0.448444	0.661	0.623	0.687708	2	Psip1	pvCM1	Two-sided Wilcoxon test	0.25	25
0.00418	0.447268	0.515	0.531	1	2	Rsl1d1	pvCM1	Two-sided Wilcoxon test	0.25	25
2.96045e-06	0.446491	0.731	0.688	0.0695231	2	Bzw1	pvCM1	Two-sided Wilcoxon test	0.25	25
1.74069e-08	0.446031	0.901	0.842	0.000408783	2	Atp5g3	pvCM1	Two-sided Wilcoxon test	0.25	25
1.53867e-06	0.444359	0.842	0.8	0.0361341	2	Slc25a3	pvCM1	Two-sided Wilcoxon test	0.25	25
0.000337076	0.442985	0.614	0.593	1	2	Tuba1b	pvCM1	Two-sided Wilcoxon test	0.25	25
0.00139783	0.442346	0.585	0.56	1	2	Cacybp	pvCM1	Two-sided Wilcoxon test	0.25	25
1.95688e-10	0.442142	0.924	0.849	4.59553e-06	2	Atp5d	pvCM1	Two-sided Wilcoxon test	0.25	25
0.00559506	0.441665	0.45	0.421	1	2	Mcm7	pvCM1	Two-sided Wilcoxon test	0.25	25
4.35618e-07	0.441439	0.901	0.86	0.01023	2	Srrm2	pvCM1	Two-sided Wilcoxon test	0.25	25
3.92742e-07	0.441209	0.673	0.615	0.00922315	2	Mapre1	pvCM1	Two-sided Wilcoxon test	0.25	25
1.90464e-05	0.440544	0.643	0.626	0.447286	2	Psmc6	pvCM1	Two-sided Wilcoxon test	0.25	25
1.19708e-09	0.437076	0.982	0.945	2.81123e-05	2	Myl2	pvCM1	Two-sided Wilcoxon test	0.25	25
0.00240138	0.436878	0.409	0.365	1	2	Ppil1	pvCM1	Two-sided Wilcoxon test	0.25	25
4.77562e-06	0.435906	0.789	0.734	0.112151	2	Fkbp3	pvCM1	Two-sided Wilcoxon test	0.25	25
1.54304e-06	0.435111	0.702	0.654	0.0362366	2	Ctnnb1	pvCM1	Two-sided Wilcoxon test	0.25	25
0.00668895	0.43505	0.468	0.464	1	2	Ppid	pvCM1	Two-sided Wilcoxon test	0.25	25
0.0071453	0.434848	0.368	0.34	1	2	Cmc2	pvCM1	Two-sided Wilcoxon test	0.25	25
0.000109109	0.434646	0.62	0.6	1	2	Eif5b	pvCM1	Two-sided Wilcoxon test	0.25	25
0.0057384	0.434332	0.444	0.434	1	2	Tomm40	pvCM1	Two-sided Wilcoxon test	0.25	25
9.22729e-10	0.434126	0.906	0.844	2.16694e-05	2	Hnrnpk	pvCM1	Two-sided Wilcoxon test	0.25	25
3.14308e-11	0.433245	0.982	0.943	7.38122e-07	2	Mif	pvCM1	Two-sided Wilcoxon test	0.25	25
1.15101e-08	0.433172	0.936	0.876	0.000270304	2	Eif1	pvCM1	Two-sided Wilcoxon test	0.25	25
5.10649e-06	0.432831	0.719	0.688	0.119921	2	Abracl	pvCM1	Two-sided Wilcoxon test	0.25	25
4.13492e-06	0.432277	0.731	0.696	0.0971045	2	Scd2	pvCM1	Two-sided Wilcoxon test	0.25	25
7.2233e-05	0.430789	0.673	0.662	1	2	Sod2	pvCM1	Two-sided Wilcoxon test	0.25	25
0.00201616	0.430751	0.339	0.282	1	2	Ppif	pvCM1	Two-sided Wilcoxon test	0.25	25
0.00311475	0.429961	0.585	0.597	1	2	Hk2	pvCM1	Two-sided Wilcoxon test	0.25	25
0.00804834	0.429521	0.374	0.339	1	2	Srsf9	pvCM1	Two-sided Wilcoxon test	0.25	25
0.00324878	0.428042	0.515	0.525	1	2	Psmc2	pvCM1	Two-sided Wilcoxon test	0.25	25
4.27462e-06	0.427994	0.702	0.623	0.100385	2	Uqcrfs1	pvCM1	Two-sided Wilcoxon test	0.25	25
0.00245501	0.42752	0.48	0.474	1	2	Wbp11	pvCM1	Two-sided Wilcoxon test	0.25	25
0.000412718	0.426984	0.31	0.222	1	2	Knstrn	pvCM1	Two-sided Wilcoxon test	0.25	25
0.00133562	0.426768	0.673	0.656	1	2	Ccnd2	pvCM1	Two-sided Wilcoxon test	0.25	25
0.000909768	0.426427	0.614	0.598	1	2	Pdap1	pvCM1	Two-sided Wilcoxon test	0.25	25
2.69288e-07	0.426364	0.877	0.868	0.00632397	2	Nexn	pvCM1	Two-sided Wilcoxon test	0.25	25
4.36751e-06	0.426159	0.749	0.723	0.102567	2	Snrpd1	pvCM1	Two-sided Wilcoxon test	0.25	25
1.28331e-05	0.426121	0.865	0.804	0.301373	2	Jund	pvCM1	Two-sided Wilcoxon test	0.25	25
0.00167295	0.425766	0.673	0.671	1	2	C1qbp	pvCM1	Two-sided Wilcoxon test	0.25	25
1.09587e-05	0.425534	0.819	0.774	0.257355	2	Eif2s2	pvCM1	Two-sided Wilcoxon test	0.25	25
0.00141081	0.424672	0.526	0.516	1	2	Nsmce4a	pvCM1	Two-sided Wilcoxon test	0.25	25
4.02634e-05	0.421501	0.444	0.344	0.945546	2	Capn6	pvCM1	Two-sided Wilcoxon test	0.25	25
0.000483534	0.420398	0.591	0.6	1	2	Nap1l4	pvCM1	Two-sided Wilcoxon test	0.25	25
7.78458e-07	0.41898	0.848	0.772	0.0182813	2	Vdac2	pvCM1	Two-sided Wilcoxon test	0.25	25
0.00016377	0.418477	0.602	0.595	1	2	Smc3	pvCM1	Two-sided Wilcoxon test	0.25	25
0.00791263	0.418288	0.333	0.292	1	2	Mmp15	pvCM1	Two-sided Wilcoxon test	0.25	25
0.000275789	0.417916	0.497	0.451	1	2	Cluh	pvCM1	Two-sided Wilcoxon test	0.25	25
0.000506534	0.417713	0.602	0.577	1	2	Idh3a	pvCM1	Two-sided Wilcoxon test	0.25	25
1.98491e-09	0.417311	0.83	0.748	4.66137e-05	2	Cct2	pvCM1	Two-sided Wilcoxon test	0.25	25
4.42404e-13	0.417046	0.994	0.987	1.03894e-08	2	Ptma	pvCM1	Two-sided Wilcoxon test	0.25	25
0.000337544	0.41612	0.503	0.462	1	2	Gipc1	pvCM1	Two-sided Wilcoxon test	0.25	25
0.00023558	0.416049	0.673	0.656	1	2	Cfl2	pvCM1	Two-sided Wilcoxon test	0.25	25
0.00472533	0.414568	0.427	0.406	1	2	Yeats4	pvCM1	Two-sided Wilcoxon test	0.25	25
0.000452494	0.413881	0.596	0.601	1	2	Pfdn2	pvCM1	Two-sided Wilcoxon test	0.25	25
0.00432479	0.41359	0.544	0.54	1	2	Gars	pvCM1	Two-sided Wilcoxon test	0.25	25
0.00017971	0.412977	0.567	0.522	1	2	Purb	pvCM1	Two-sided Wilcoxon test	0.25	25
9.81384e-05	0.412804	0.596	0.554	1	2	Snrpd3	pvCM1	Two-sided Wilcoxon test	0.25	25
6.36171e-06	0.411319	0.784	0.772	0.149398	2	Vdac1	pvCM1	Two-sided Wilcoxon test	0.25	25
0.000156964	0.410418	0.678	0.652	1	2	Park7	pvCM1	Two-sided Wilcoxon test	0.25	25
1.37944e-06	0.410145	0.754	0.708	0.0323948	2	Hk1	pvCM1	Two-sided Wilcoxon test	0.25	25
0.000361985	0.409175	0.696	0.688	1	2	Ptges3	pvCM1	Two-sided Wilcoxon test	0.25	25
7.79768e-05	0.407997	0.749	0.723	1	2	Dnaja1	pvCM1	Two-sided Wilcoxon test	0.25	25
4.1964e-06	0.40763	0.918	0.838	0.0985482	2	Prdx1	pvCM1	Two-sided Wilcoxon test	0.25	25
0.0018725	0.407009	0.579	0.578	1	2	Fkbp4	pvCM1	Two-sided Wilcoxon test	0.25	25
0.00361361	0.406411	0.526	0.525	1	2	Ssr1	pvCM1	Two-sided Wilcoxon test	0.25	25
0.0095792	0.405963	0.52	0.517	1	2	Slc16a3	pvCM1	Two-sided Wilcoxon test	0.25	25
0.000443569	0.404744	0.339	0.26	1	2	Cdca3	pvCM1	Two-sided Wilcoxon test	0.25	25
0.00411739	0.402426	0.497	0.498	1	2	Mrps14	pvCM1	Two-sided Wilcoxon test	0.25	25
1.08297e-11	0.401835	1	0.988	2.54325e-07	2	Ppia	pvCM1	Two-sided Wilcoxon test	0.25	25
1.2703e-06	0.401155	0.848	0.83	0.0298317	2	Idh2	pvCM1	Two-sided Wilcoxon test	0.25	25
0.0023696	0.398696	0.456	0.418	1	2	Nudcd2	pvCM1	Two-sided Wilcoxon test	0.25	25
0.00132712	0.397986	0.626	0.622	1	2	Dnaja2	pvCM1	Two-sided Wilcoxon test	0.25	25
0.00228953	0.397504	0.614	0.618	1	2	Psma4	pvCM1	Two-sided Wilcoxon test	0.25	25
0.00225825	0.396679	0.561	0.553	1	2	Mlec	pvCM1	Two-sided Wilcoxon test	0.25	25
9.46227e-05	0.396036	0.632	0.636	1	2	Etfa	pvCM1	Two-sided Wilcoxon test	0.25	25
7.27891e-07	0.395233	0.813	0.768	0.0170938	2	Eif5a	pvCM1	Two-sided Wilcoxon test	0.25	25
2.73877e-07	0.393897	0.906	0.879	0.00643173	2	Serbp1	pvCM1	Two-sided Wilcoxon test	0.25	25
0.000606607	0.39079	0.509	0.477	1	2	Aifm1	pvCM1	Two-sided Wilcoxon test	0.25	25
0.00124003	0.388333	0.69	0.717	1	2	Hspa4	pvCM1	Two-sided Wilcoxon test	0.25	25
3.46599e-07	0.388287	0.83	0.748	0.00813954	2	Rbm3	pvCM1	Two-sided Wilcoxon test	0.25	25
2.3119e-05	0.385266	0.754	0.699	0.542928	2	U2af1	pvCM1	Two-sided Wilcoxon test	0.25	25
1.71735e-05	0.384767	0.725	0.706	0.403303	2	Eif4g1	pvCM1	Two-sided Wilcoxon test	0.25	25
5.72895e-08	0.383795	0.807	0.713	0.00134539	2	Cct6a	pvCM1	Two-sided Wilcoxon test	0.25	25
0.00210662	0.38359	0.509	0.482	1	2	Mcl1	pvCM1	Two-sided Wilcoxon test	0.25	25
0.000908542	0.38311	0.275	0.188	1	2	Hist1h3c	pvCM1	Two-sided Wilcoxon test	0.25	25
6.32553e-06	0.382661	0.754	0.731	0.148549	2	Top1	pvCM1	Two-sided Wilcoxon test	0.25	25
1.71793e-09	0.382226	0.906	0.824	4.03438e-05	2	Vim	pvCM1	Two-sided Wilcoxon test	0.25	25
0.00333771	0.381461	0.269	0.202	1	2	Ncapg	pvCM1	Two-sided Wilcoxon test	0.25	25
2.80679e-05	0.38103	0.825	0.789	0.659146	2	Set	pvCM1	Two-sided Wilcoxon test	0.25	25
0.000637487	0.380321	0.626	0.614	1	2	Phb2	pvCM1	Two-sided Wilcoxon test	0.25	25
0.000950315	0.378356	0.626	0.617	1	2	Dnajc7	pvCM1	Two-sided Wilcoxon test	0.25	25
0.000826941	0.378224	0.573	0.549	1	2	Trim28	pvCM1	Two-sided Wilcoxon test	0.25	25
0.00907852	0.374607	0.696	0.703	1	2	Nasp	pvCM1	Two-sided Wilcoxon test	0.25	25
0.000154761	0.373369	0.684	0.683	1	2	Eef1d	pvCM1	Two-sided Wilcoxon test	0.25	25
0.0059887	0.373361	0.556	0.568	1	2	Acadl	pvCM1	Two-sided Wilcoxon test	0.25	25
0.00290562	0.373214	0.55	0.54	1	2	Dnajc8	pvCM1	Two-sided Wilcoxon test	0.25	25
0.000221423	0.371216	0.673	0.67	1	2	Mrfap1	pvCM1	Two-sided Wilcoxon test	0.25	25
0.000637486	0.36658	0.556	0.52	1	2	Uba1	pvCM1	Two-sided Wilcoxon test	0.25	25
0.00157413	0.366402	0.708	0.69	1	2	Eid1	pvCM1	Two-sided Wilcoxon test	0.25	25
1.27529e-06	0.365699	0.865	0.811	0.0299489	2	Pdia6	pvCM1	Two-sided Wilcoxon test	0.25	25
0.000478148	0.365242	0.591	0.565	1	2	Mrpl18	pvCM1	Two-sided Wilcoxon test	0.25	25
0.00514052	0.362126	0.719	0.735	1	2	Sept7	pvCM1	Two-sided Wilcoxon test	0.25	25
0.000246673	0.360811	0.801	0.746	1	2	Hmgn1	pvCM1	Two-sided Wilcoxon test	0.25	25
0.00023433	0.360366	0.737	0.669	1	2	Cst3	pvCM1	Two-sided Wilcoxon test	0.25	25
0.000146117	0.357874	0.719	0.704	1	2	Pabpc1	pvCM1	Two-sided Wilcoxon test	0.25	25
3.24726e-07	0.357411	0.836	0.822	0.00762587	2	Eef2	pvCM1	Two-sided Wilcoxon test	0.25	25
2.31607e-05	0.35729	0.725	0.708	0.543907	2	Sarnp	pvCM1	Two-sided Wilcoxon test	0.25	25
0.000202857	0.355584	0.737	0.731	1	2	Chd4	pvCM1	Two-sided Wilcoxon test	0.25	25
0.000608782	0.354971	0.655	0.642	1	2	Txnl1	pvCM1	Two-sided Wilcoxon test	0.25	25
5.16027e-07	0.353528	0.918	0.847	0.0121184	2	Eno1	pvCM1	Two-sided Wilcoxon test	0.25	25
0.0025357	0.352818	0.749	0.769	1	2	Cct8	pvCM1	Two-sided Wilcoxon test	0.25	25
0.000109621	0.35243	1	0.994	1	2	mt-Nd2	pvCM1	Two-sided Wilcoxon test	0.25	25
0.00284153	0.349139	0.544	0.55	1	2	Rrp1	pvCM1	Two-sided Wilcoxon test	0.25	25
0.00339432	0.348709	0.632	0.626	1	2	Rrad	pvCM1	Two-sided Wilcoxon test	0.25	25
3.71734e-07	0.346775	0.942	0.855	0.00872979	2	Csrp3	pvCM1	Two-sided Wilcoxon test	0.25	25
0.00274106	0.346688	0.626	0.603	1	2	Asb2	pvCM1	Two-sided Wilcoxon test	0.25	25
0.00935414	0.346584	0.579	0.539	1	2	Lbh	pvCM1	Two-sided Wilcoxon test	0.25	25
0.000166632	0.345619	0.825	0.789	1	2	Atp5f1	pvCM1	Two-sided Wilcoxon test	0.25	25
1.59764e-06	0.344924	0.912	0.841	0.0375189	2	Hsp90b1	pvCM1	Two-sided Wilcoxon test	0.25	25
0.0089509	0.343139	0.626	0.636	1	2	Oip5os1	pvCM1	Two-sided Wilcoxon test	0.25	25
3.65412e-07	0.342602	0.977	0.966	0.00858133	2	Tnnc1	pvCM1	Two-sided Wilcoxon test	0.25	25
0.00421819	0.338635	0.596	0.606	1	2	Ybx3	pvCM1	Two-sided Wilcoxon test	0.25	25
8.20456e-05	0.334552	0.865	0.848	1	2	Eef1g	pvCM1	Two-sided Wilcoxon test	0.25	25
0.00811851	0.333927	0.649	0.644	1	2	Atp6v0c	pvCM1	Two-sided Wilcoxon test	0.25	25
0.000165707	0.33269	0.743	0.708	1	2	Cfl1	pvCM1	Two-sided Wilcoxon test	0.25	25
0.0017502	0.330443	0.76	0.775	1	2	Fxr1	pvCM1	Two-sided Wilcoxon test	0.25	25
0.000822115	0.329915	0.544	0.502	1	2	Selenoh	pvCM1	Two-sided Wilcoxon test	0.25	25
0.00476671	0.329605	0.602	0.606	1	2	Rab14	pvCM1	Two-sided Wilcoxon test	0.25	25
0.00476705	0.328725	0.474	0.431	1	2	Hmgn3	pvCM1	Two-sided Wilcoxon test	0.25	25
0.001368	0.328063	0.772	0.749	1	2	Des	pvCM1	Two-sided Wilcoxon test	0.25	25
0.00568749	0.32506	0.789	0.783	1	2	Eif3a	pvCM1	Two-sided Wilcoxon test	0.25	25
3.85623e-07	0.324823	0.965	0.903	0.00905597	2	Ldha	pvCM1	Two-sided Wilcoxon test	0.25	25
0.00206159	0.324738	0.573	0.562	1	2	Thoc7	pvCM1	Two-sided Wilcoxon test	0.25	25
0.00547693	0.322839	0.561	0.546	1	2	Timm17a	pvCM1	Two-sided Wilcoxon test	0.25	25
5.78429e-07	0.322532	0.936	0.847	0.0135838	2	Myl9	pvCM1	Two-sided Wilcoxon test	0.25	25
0.00358025	0.322427	0.649	0.654	1	2	Ddx39b	pvCM1	Two-sided Wilcoxon test	0.25	25
9.78888e-05	0.322037	0.854	0.839	1	2	Atp1a1	pvCM1	Two-sided Wilcoxon test	0.25	25
0.000126163	0.32182	0.842	0.782	1	2	Ppp1r14b	pvCM1	Two-sided Wilcoxon test	0.25	25
0.000831208	0.319614	0.848	0.82	1	2	Eif4g2	pvCM1	Two-sided Wilcoxon test	0.25	25
0.00882848	0.319436	0.38	0.33	1	2	Gja1	pvCM1	Two-sided Wilcoxon test	0.25	25
0.00673863	0.317205	0.567	0.545	1	2	Tmed2	pvCM1	Two-sided Wilcoxon test	0.25	25
0.00410617	0.315416	0.772	0.738	1	2	Canx	pvCM1	Two-sided Wilcoxon test	0.25	25
0.000381268	0.315376	0.661	0.646	1	2	Timm23	pvCM1	Two-sided Wilcoxon test	0.25	25
0.00039185	0.314917	1	0.993	1	2	mt-Cytb	pvCM1	Two-sided Wilcoxon test	0.25	25
1.05658e-06	0.314787	0.953	0.883	0.0248128	2	Cox5a	pvCM1	Two-sided Wilcoxon test	0.25	25
0.000158006	0.3145	0.807	0.792	1	2	Pdia3	pvCM1	Two-sided Wilcoxon test	0.25	25
0.000525532	0.313821	0.76	0.772	1	2	Uqcrb	pvCM1	Two-sided Wilcoxon test	0.25	25
3.84528e-07	0.313677	0.988	0.958	0.00903025	2	Rpl3	pvCM1	Two-sided Wilcoxon test	0.25	25
0.00119764	0.309587	0.842	0.815	1	2	Sumo2	pvCM1	Two-sided Wilcoxon test	0.25	25
0.000205206	0.307237	0.936	0.879	1	2	Chchd2	pvCM1	Two-sided Wilcoxon test	0.25	25
0.00108711	0.304109	0.667	0.638	1	2	Clic1	pvCM1	Two-sided Wilcoxon test	0.25	25
9.26684e-05	0.302775	0.731	0.696	1	2	Uqcrc2	pvCM1	Two-sided Wilcoxon test	0.25	25
0.00383805	0.302542	0.76	0.767	1	2	Ndufab1	pvCM1	Two-sided Wilcoxon test	0.25	25
6.61805e-05	0.301488	0.819	0.784	1	2	Prrc2c	pvCM1	Two-sided Wilcoxon test	0.25	25
0.00438386	0.300356	0.608	0.61	1	2	Fyttd1	pvCM1	Two-sided Wilcoxon test	0.25	25
0.00138233	0.298229	0.637	0.621	1	2	Pomp	pvCM1	Two-sided Wilcoxon test	0.25	25
0.00126225	0.294865	0.725	0.697	1	2	Cycs	pvCM1	Two-sided Wilcoxon test	0.25	25
0.00371676	0.293359	0.667	0.666	1	2	Vdac3	pvCM1	Two-sided Wilcoxon test	0.25	25
0.00354999	0.292263	0.655	0.647	1	2	Nme1	pvCM1	Two-sided Wilcoxon test	0.25	25
2.77808e-06	0.290937	0.883	0.801	0.0652403	2	Ran	pvCM1	Two-sided Wilcoxon test	0.25	25
0.00659162	0.290309	0.661	0.665	1	2	Cct5	pvCM1	Two-sided Wilcoxon test	0.25	25
0.000597724	0.289232	0.667	0.621	1	2	Dad1	pvCM1	Two-sided Wilcoxon test	0.25	25
0.00710233	0.288471	0.696	0.691	1	2	Snrpb	pvCM1	Two-sided Wilcoxon test	0.25	25
0.00738831	0.288294	0.532	0.515	1	2	Tmpo	pvCM1	Two-sided Wilcoxon test	0.25	25
3.65238e-06	0.276976	0.936	0.885	0.0857725	2	Tnni1	pvCM1	Two-sided Wilcoxon test	0.25	25
0.00954937	0.273781	0.509	0.459	1	2	Marcks	pvCM1	Two-sided Wilcoxon test	0.25	25
1.48311e-05	0.273205	0.971	0.947	0.348293	2	H3f3a	pvCM1	Two-sided Wilcoxon test	0.25	25
0.000391665	0.272399	0.795	0.731	1	2	Cryab	pvCM1	Two-sided Wilcoxon test	0.25	25
0.00912259	0.272089	0.608	0.571	1	2	Ndufs7	pvCM1	Two-sided Wilcoxon test	0.25	25
0.00179475	0.272038	0.649	0.622	1	2	Ndufv2	pvCM1	Two-sided Wilcoxon test	0.25	25
2.76553e-06	0.271852	0.982	0.906	0.0649457	2	Aldoa	pvCM1	Two-sided Wilcoxon test	0.25	25
0.000268318	0.27024	0.807	0.756	1	2	Mdk	pvCM1	Two-sided Wilcoxon test	0.25	25
0.00789762	0.267494	0.667	0.678	1	2	Rbbp7	pvCM1	Two-sided Wilcoxon test	0.25	25
0.00725288	0.26467	0.766	0.785	1	2	Son	pvCM1	Two-sided Wilcoxon test	0.25	25
0.00738115	0.262708	0.789	0.752	1	2	Ndufc2	pvCM1	Two-sided Wilcoxon test	0.25	25
0.00806217	0.262399	0.696	0.694	1	2	Smyd1	pvCM1	Two-sided Wilcoxon test	0.25	25
0.00257017	0.255028	0.813	0.832	1	2	mt-Nd6	pvCM1	Two-sided Wilcoxon test	0.25	25
0.0010846	0.252861	0.795	0.794	1	2	Gpi1	pvCM1	Two-sided Wilcoxon test	0.25	25
2.32552e-08	0.252707	0.994	0.979	0.000546126	2	Myl4	pvCM1	Two-sided Wilcoxon test	0.25	25
3.73792e-09	0.251574	1	1	8.77814e-05	2	Gm42418	pvCM1	Two-sided Wilcoxon test	0.25	25
2.5321e-75	2.86146	0.953	0.392	5.94638e-71	3	Gpc6	AVC/OFTm	Two-sided Wilcoxon test	0.25	25
7.12956e-103	2.38597	0.893	0.165	1.6743e-98	3	Unc5c	AVC/OFTm	Two-sided Wilcoxon test	0.25	25
5.5989e-85	2.09935	0.96	0.252	1.31484e-80	3	Robo1	AVC/OFTm	Two-sided Wilcoxon test	0.25	25
6.33589e-93	2.07869	0.725	0.099	1.48792e-88	3	Robo2	AVC/OFTm	Two-sided Wilcoxon test	0.25	25
7.54855e-49	1.99795	0.899	0.437	1.7727e-44	3	Ptn	AVC/OFTm	Two-sided Wilcoxon test	0.25	25
4.81018e-102	1.96532	0.866	0.15	1.12962e-97	3	Cdh11	AVC/OFTm	Two-sided Wilcoxon test	0.25	25
4.8927e-65	1.86468	0.899	0.279	1.149e-60	3	Foxp2	AVC/OFTm	Two-sided Wilcoxon test	0.25	25
2.12952e-64	1.86141	0.94	0.376	5.00095e-60	3	Rbms3	AVC/OFTm	Two-sided Wilcoxon test	0.25	25
8.44848e-84	1.85265	0.57	0.059	1.98404e-79	3	Ebf1	AVC/OFTm	Two-sided Wilcoxon test	0.25	25
2.0138e-82	1.85089	0.96	0.268	4.72922e-78	3	Fbxl7	AVC/OFTm	Two-sided Wilcoxon test	0.25	25
1.78339e-59	1.82982	0.725	0.17	4.18811e-55	3	Mecom	AVC/OFTm	Two-sided Wilcoxon test	0.25	25
2.5599e-57	1.6055	0.953	0.447	6.01166e-53	3	Hmga2	AVC/OFTm	Two-sided Wilcoxon test	0.25	25
1.05627e-68	1.58443	0.772	0.16	2.48054e-64	3	Tenm4	AVC/OFTm	Two-sided Wilcoxon test	0.25	25
1.22194e-57	1.58077	0.96	0.408	2.86961e-53	3	Efna5	AVC/OFTm	Two-sided Wilcoxon test	0.25	25
1.56525e-71	1.57908	0.846	0.204	3.67583e-67	3	Tshz2	AVC/OFTm	Two-sided Wilcoxon test	0.25	25
4.18098e-57	1.52379	0.946	0.4	9.81861e-53	3	Tenm3	AVC/OFTm	Two-sided Wilcoxon test	0.25	25
1.06862e-76	1.51646	0.799	0.164	2.50956e-72	3	Col3a1	AVC/OFTm	Two-sided Wilcoxon test	0.25	25
1.11469e-47	1.51073	0.993	0.712	2.61773e-43	3	Pbx1	AVC/OFTm	Two-sided Wilcoxon test	0.25	25
3.00581e-91	1.50504	0.758	0.108	7.05884e-87	3	2610307P16Rik	AVC/OFTm	Two-sided Wilcoxon test	0.25	25
3.26253e-47	1.46529	0.98	0.538	7.66173e-43	3	Nfia	AVC/OFTm	Two-sided Wilcoxon test	0.25	25
4.6884e-40	1.46057	0.859	0.327	1.10102e-35	3	Tmtc2	AVC/OFTm	Two-sided Wilcoxon test	0.25	25
4.24738e-52	1.43834	0.987	0.603	9.97455e-48	3	Meis2	AVC/OFTm	Two-sided Wilcoxon test	0.25	25
1.76675e-42	1.41998	0.987	0.721	4.14903e-38	3	Gpc3	AVC/OFTm	Two-sided Wilcoxon test	0.25	25
2.2191e-86	1.41873	0.591	0.059	5.21133e-82	3	Nav3	AVC/OFTm	Two-sided Wilcoxon test	0.25	25
2.42885e-46	1.40204	1	0.654	5.70391e-42	3	Auts2	AVC/OFTm	Two-sided Wilcoxon test	0.25	25
3.06009e-59	1.40072	0.933	0.331	7.1863e-55	3	Frmd4a	AVC/OFTm	Two-sided Wilcoxon test	0.25	25
4.03443e-51	1.39868	0.483	0.073	9.47446e-47	3	Nrxn3	AVC/OFTm	Two-sided Wilcoxon test	0.25	25
1.26706e-45	1.38909	0.987	0.663	2.97557e-41	3	Nfib	AVC/OFTm	Two-sided Wilcoxon test	0.25	25
3.1982e-70	1.33094	0.651	0.104	7.51066e-66	3	Epha3	AVC/OFTm	Two-sided Wilcoxon test	0.25	25
9.00948e-122	1.32795	0.604	0.033	2.11579e-117	3	Bnc2	AVC/OFTm	Two-sided Wilcoxon test	0.25	25
2.62228e-50	1.31555	0.987	0.505	6.15816e-46	3	Tcf4	AVC/OFTm	Two-sided Wilcoxon test	0.25	25
1.17618e-67	1.31418	0.832	0.202	2.76214e-63	3	Klf12	AVC/OFTm	Two-sided Wilcoxon test	0.25	25
9.29154e-45	1.30013	0.966	0.458	2.18202e-40	3	Mir99ahg	AVC/OFTm	Two-sided Wilcoxon test	0.25	25
2.06089e-95	1.29501	0.886	0.159	4.8398e-91	3	Gli3	AVC/OFTm	Two-sided Wilcoxon test	0.25	25
1.02379e-38	1.2896	0.98	0.523	2.40427e-34	3	Dlc1	AVC/OFTm	Two-sided Wilcoxon test	0.25	25
1.49069e-107	1.28389	0.564	0.034	3.50074e-103	3	Ebf3	AVC/OFTm	Two-sided Wilcoxon test	0.25	25
7.98431e-46	1.28078	0.671	0.171	1.87504e-41	3	Ptprm	AVC/OFTm	Two-sided Wilcoxon test	0.25	25
5.6187e-101	1.28001	0.779	0.102	1.3195e-96	3	Prickle2	AVC/OFTm	Two-sided Wilcoxon test	0.25	25
7.02841e-103	1.27168	0.852	0.123	1.65055e-98	3	Arhgap28	AVC/OFTm	Two-sided Wilcoxon test	0.25	25
7.30046e-102	1.26814	0.779	0.097	1.71444e-97	3	Col1a2	AVC/OFTm	Two-sided Wilcoxon test	0.25	25
3.06235e-60	1.2485	0.846	0.204	7.19162e-56	3	Sox5	AVC/OFTm	Two-sided Wilcoxon test	0.25	25
1.4686e-74	1.23084	0.638	0.091	3.44885e-70	3	Nhs	AVC/OFTm	Two-sided Wilcoxon test	0.25	25
6.3484e-61	1.22154	0.859	0.234	1.49086e-56	3	St6galnac3	AVC/OFTm	Two-sided Wilcoxon test	0.25	25
2.55584e-35	1.22014	0.705	0.239	6.00214e-31	3	Sema3a	AVC/OFTm	Two-sided Wilcoxon test	0.25	25
3.23047e-83	1.19843	0.758	0.119	7.58644e-79	3	Col1a1	AVC/OFTm	Two-sided Wilcoxon test	0.25	25
1.8614e-44	1.19659	0.94	0.417	4.37132e-40	3	Maml3	AVC/OFTm	Two-sided Wilcoxon test	0.25	25
1.41168e-36	1.19331	0.899	0.418	3.31519e-32	3	Aff3	AVC/OFTm	Two-sided Wilcoxon test	0.25	25
3.61288e-45	1.17514	0.953	0.432	8.48449e-41	3	Ptprg	AVC/OFTm	Two-sided Wilcoxon test	0.25	25
2.19336e-28	1.17321	0.987	0.954	5.1509e-24	3	Actb	AVC/OFTm	Two-sided Wilcoxon test	0.25	25
1.75734e-43	1.17008	0.933	0.428	4.12694e-39	3	Fn1	AVC/OFTm	Two-sided Wilcoxon test	0.25	25
1.14046e-53	1.16782	0.913	0.318	2.67826e-49	3	Ttc28	AVC/OFTm	Two-sided Wilcoxon test	0.25	25
6.20465e-68	1.14908	0.866	0.215	1.4571e-63	3	Mir100hg	AVC/OFTm	Two-sided Wilcoxon test	0.25	25
2.22942e-31	1.14579	0.678	0.223	5.23558e-27	3	Xist	AVC/OFTm	Two-sided Wilcoxon test	0.25	25
1.05052e-51	1.13885	0.611	0.119	2.46704e-47	3	Magi2	AVC/OFTm	Two-sided Wilcoxon test	0.25	25
6.12846e-56	1.13772	0.732	0.168	1.43921e-51	3	Ldlrad4	AVC/OFTm	Two-sided Wilcoxon test	0.25	25
1.49835e-40	1.1364	0.94	0.435	3.51873e-36	3	Meg3	AVC/OFTm	Two-sided Wilcoxon test	0.25	25
2.12656e-41	1.12623	0.98	0.608	4.99402e-37	3	Foxp1	AVC/OFTm	Two-sided Wilcoxon test	0.25	25
2.37579e-52	1.11833	0.866	0.285	5.5793e-48	3	Zswim6	AVC/OFTm	Two-sided Wilcoxon test	0.25	25
5.23789e-50	1.10497	0.718	0.18	1.23007e-45	3	Pcsk5	AVC/OFTm	Two-sided Wilcoxon test	0.25	25
2.56085e-47	1.09759	0.872	0.291	6.01389e-43	3	Trps1	AVC/OFTm	Two-sided Wilcoxon test	0.25	25
2.51877e-43	1.09028	0.993	0.613	5.91508e-39	3	Tcf12	AVC/OFTm	Two-sided Wilcoxon test	0.25	25
5.31043e-84	1.08217	0.832	0.153	1.2471e-79	3	Tcf7l1	AVC/OFTm	Two-sided Wilcoxon test	0.25	25
6.795e-33	1.07912	0.926	0.469	1.59574e-28	3	Pbx3	AVC/OFTm	Two-sided Wilcoxon test	0.25	25
2.68999e-32	1.06457	0.893	0.457	6.31718e-28	3	Zfhx3	AVC/OFTm	Two-sided Wilcoxon test	0.25	25
1.37961e-35	1.06412	0.866	0.421	3.23988e-31	3	Marcks	AVC/OFTm	Two-sided Wilcoxon test	0.25	25
8.9365e-78	1.04608	0.812	0.157	2.09865e-73	3	Fmnl2	AVC/OFTm	Two-sided Wilcoxon test	0.25	25
3.82766e-28	1.04457	0.987	0.91	8.98888e-24	3	Actg1	AVC/OFTm	Two-sided Wilcoxon test	0.25	25
1.09205e-64	1.04405	0.456	0.046	2.56457e-60	3	Lsamp	AVC/OFTm	Two-sided Wilcoxon test	0.25	25
1.06426e-34	1.04226	0.872	0.357	2.49931e-30	3	Creb5	AVC/OFTm	Two-sided Wilcoxon test	0.25	25
4.05904e-66	1.03613	0.617	0.097	9.53226e-62	3	Sulf1	AVC/OFTm	Two-sided Wilcoxon test	0.25	25
2.16824e-41	1.02766	0.899	0.387	5.0919e-37	3	Kalrn	AVC/OFTm	Two-sided Wilcoxon test	0.25	25
4.11634e-36	1.02731	0.866	0.325	9.66681e-32	3	Ror1	AVC/OFTm	Two-sided Wilcoxon test	0.25	25
2.48949e-51	1.02696	0.483	0.072	5.84631e-47	3	Col23a1	AVC/OFTm	Two-sided Wilcoxon test	0.25	25
7.93302e-65	1.02516	0.799	0.186	1.86299e-60	3	Basp1	AVC/OFTm	Two-sided Wilcoxon test	0.25	25
1.59767e-34	1.02124	0.893	0.411	3.75197e-30	3	Bach2	AVC/OFTm	Two-sided Wilcoxon test	0.25	25
4.87119e-40	1.01432	0.973	0.494	1.14395e-35	3	Arid1b	AVC/OFTm	Two-sided Wilcoxon test	0.25	25
1.46604e-87	1.01084	0.557	0.048	3.44285e-83	3	Nkain3	AVC/OFTm	Two-sided Wilcoxon test	0.25	25
8.35479e-33	1.01049	0.98	0.587	1.96204e-28	3	Prkg1	AVC/OFTm	Two-sided Wilcoxon test	0.25	25
3.11646e-34	1.00934	0.919	0.43	7.31869e-30	3	Hmcn1	AVC/OFTm	Two-sided Wilcoxon test	0.25	25
8.44005e-31	1.00477	0.98	0.604	1.98206e-26	3	Ext1	AVC/OFTm	Two-sided Wilcoxon test	0.25	25
6.15336e-45	1.00153	0.933	0.376	1.44506e-40	3	Dock1	AVC/OFTm	Two-sided Wilcoxon test	0.25	25
4.07419e-61	1.00007	0.819	0.204	9.56782e-57	3	Pitpnc1	AVC/OFTm	Two-sided Wilcoxon test	0.25	25
3.3719e-63	0.997172	0.732	0.152	7.91858e-59	3	Col5a2	AVC/OFTm	Two-sided Wilcoxon test	0.25	25
4.06682e-66	0.993727	0.611	0.092	9.55052e-62	3	Sema5a	AVC/OFTm	Two-sided Wilcoxon test	0.25	25
3.63775e-58	0.979936	0.752	0.171	8.54289e-54	3	Npas3	AVC/OFTm	Two-sided Wilcoxon test	0.25	25
1.00244e-27	0.978033	0.98	0.541	2.35414e-23	3	Grip1	AVC/OFTm	Two-sided Wilcoxon test	0.25	25
7.47087e-74	0.974811	0.47	0.039	1.75446e-69	3	Pcdh9	AVC/OFTm	Two-sided Wilcoxon test	0.25	25
7.19407e-60	0.968091	0.624	0.107	1.68946e-55	3	Fosb	AVC/OFTm	Two-sided Wilcoxon test	0.25	25
3.56687e-37	0.964627	0.973	0.54	8.37643e-33	3	Kansl1	AVC/OFTm	Two-sided Wilcoxon test	0.25	25
1.66665e-117	0.951122	0.651	0.045	3.91396e-113	3	Tshz3	AVC/OFTm	Two-sided Wilcoxon test	0.25	25
1.11993e-34	0.9508	0.866	0.401	2.63005e-30	3	Zfp462	AVC/OFTm	Two-sided Wilcoxon test	0.25	25
3.725e-91	0.950716	0.772	0.11	8.74778e-87	3	Sh3rf1	AVC/OFTm	Two-sided Wilcoxon test	0.25	25
1.1566e-30	0.948615	0.933	0.454	2.71616e-26	3	Lhfp	AVC/OFTm	Two-sided Wilcoxon test	0.25	25
1.61452e-70	0.946484	0.49	0.048	3.79154e-66	3	Col25a1	AVC/OFTm	Two-sided Wilcoxon test	0.25	25
2.7042e-36	0.944256	0.98	0.448	6.35055e-32	3	Maml2	AVC/OFTm	Two-sided Wilcoxon test	0.25	25
1.32064e-69	0.942251	0.624	0.091	3.10139e-65	3	Zfhx4	AVC/OFTm	Two-sided Wilcoxon test	0.25	25
1.92334e-29	0.940322	0.966	0.604	4.51676e-25	3	Baz2b	AVC/OFTm	Two-sided Wilcoxon test	0.25	25
8.90615e-54	0.937639	0.718	0.168	2.09152e-49	3	5730522E02Rik	AVC/OFTm	Two-sided Wilcoxon test	0.25	25
1.76819e-29	0.937548	0.832	0.375	4.15242e-25	3	Slit3	AVC/OFTm	Two-sided Wilcoxon test	0.25	25
1.49548e-25	0.931057	0.946	0.611	3.51198e-21	3	Meis1	AVC/OFTm	Two-sided Wilcoxon test	0.25	25
5.66107e-32	0.914111	0.792	0.358	1.32945e-27	3	Marcksl1	AVC/OFTm	Two-sided Wilcoxon test	0.25	25
9.18085e-41	0.910336	0.926	0.43	2.15603e-36	3	Ssbp3	AVC/OFTm	Two-sided Wilcoxon test	0.25	25
1.07874e-72	0.904991	0.57	0.067	2.53331e-68	3	Limch1	AVC/OFTm	Two-sided Wilcoxon test	0.25	25
7.69123e-64	0.904444	0.651	0.11	1.80621e-59	3	Greb1l	AVC/OFTm	Two-sided Wilcoxon test	0.25	25
1.7986e-40	0.8993	0.758	0.224	4.22383e-36	3	A630012P03Rik	AVC/OFTm	Two-sided Wilcoxon test	0.25	25
1.89955e-83	0.888052	0.43	0.023	4.46091e-79	3	Ctnna2	AVC/OFTm	Two-sided Wilcoxon test	0.25	25
2.97421e-42	0.880992	0.805	0.261	6.98463e-38	3	Ptch1	AVC/OFTm	Two-sided Wilcoxon test	0.25	25
3.97733e-46	0.877514	0.826	0.25	9.34037e-42	3	Gmds	AVC/OFTm	Two-sided Wilcoxon test	0.25	25
6.22862e-37	0.877469	0.483	0.101	1.46273e-32	3	Pde7b	AVC/OFTm	Two-sided Wilcoxon test	0.25	25
7.26074e-27	0.874049	0.913	0.454	1.70511e-22	3	Ghr	AVC/OFTm	Two-sided Wilcoxon test	0.25	25
1.42336e-28	0.862546	0.953	0.508	3.34262e-24	3	Atrnl1	AVC/OFTm	Two-sided Wilcoxon test	0.25	25
1.23449e-29	0.861239	0.846	0.371	2.89907e-25	3	Ncam1	AVC/OFTm	Two-sided Wilcoxon test	0.25	25
2.1544e-25	0.85779	0.987	0.585	5.05939e-21	3	Pde4d	AVC/OFTm	Two-sided Wilcoxon test	0.25	25
3.47654e-26	0.854347	0.94	0.589	8.16431e-22	3	Ptprd	AVC/OFTm	Two-sided Wilcoxon test	0.25	25
3.21005e-34	0.853262	0.946	0.48	7.53848e-30	3	Farp1	AVC/OFTm	Two-sided Wilcoxon test	0.25	25
1.28805e-38	0.853247	0.966	0.471	3.02486e-34	3	Dock7	AVC/OFTm	Two-sided Wilcoxon test	0.25	25
5.46778e-48	0.853128	0.879	0.298	1.28405e-43	3	Peli1	AVC/OFTm	Two-sided Wilcoxon test	0.25	25
1.16418e-57	0.852666	0.483	0.063	2.73395e-53	3	Eya4	AVC/OFTm	Two-sided Wilcoxon test	0.25	25
2.55412e-40	0.852426	0.919	0.396	5.99809e-36	3	Fnbp1l	AVC/OFTm	Two-sided Wilcoxon test	0.25	25
8.81091e-31	0.848745	0.987	0.616	2.06915e-26	3	Stag1	AVC/OFTm	Two-sided Wilcoxon test	0.25	25
2.8533e-39	0.845649	0.685	0.203	6.70068e-35	3	Flrt2	AVC/OFTm	Two-sided Wilcoxon test	0.25	25
1.39039e-34	0.843103	0.966	0.518	3.26519e-30	3	Map4k4	AVC/OFTm	Two-sided Wilcoxon test	0.25	25
1.12026e-41	0.839702	0.779	0.239	2.63081e-37	3	Rbp1	AVC/OFTm	Two-sided Wilcoxon test	0.25	25
1.67778e-110	0.837475	0.725	0.067	3.94009e-106	3	Rai14	AVC/OFTm	Two-sided Wilcoxon test	0.25	25
2.31342e-27	0.836525	0.906	0.415	5.43282e-23	3	Adgrl3	AVC/OFTm	Two-sided Wilcoxon test	0.25	25
1.32229e-29	0.835603	0.96	0.596	3.10527e-25	3	Rbms1	AVC/OFTm	Two-sided Wilcoxon test	0.25	25
4.71327e-20	0.834463	0.832	0.42	1.10686e-15	3	Sgcd	AVC/OFTm	Two-sided Wilcoxon test	0.25	25
9.18755e-134	0.830173	0.691	0.041	2.1576e-129	3	Zfp423	AVC/OFTm	Two-sided Wilcoxon test	0.25	25
1.71371e-55	0.825557	0.591	0.098	4.02447e-51	3	Bmpr1b	AVC/OFTm	Two-sided Wilcoxon test	0.25	25
1.5629e-62	0.821835	0.725	0.146	3.67031e-58	3	Lhfpl2	AVC/OFTm	Two-sided Wilcoxon test	0.25	25
7.21928e-52	0.819521	0.295	0.02	1.69538e-47	3	Adgrb3	AVC/OFTm	Two-sided Wilcoxon test	0.25	25
3.77114e-48	0.814144	0.765	0.207	8.85615e-44	3	Gulp1	AVC/OFTm	Two-sided Wilcoxon test	0.25	25
2.4749e-56	0.813273	0.463	0.057	5.81206e-52	3	Adam12	AVC/OFTm	Two-sided Wilcoxon test	0.25	25
3.58483e-105	0.812009	0.57	0.035	8.41862e-101	3	Prex2	AVC/OFTm	Two-sided Wilcoxon test	0.25	25
4.11237e-80	0.808755	0.691	0.098	9.6575e-76	3	Arhgap42	AVC/OFTm	Two-sided Wilcoxon test	0.25	25
7.63368e-44	0.80838	0.792	0.242	1.79269e-39	3	Dock4	AVC/OFTm	Two-sided Wilcoxon test	0.25	25
9.8412e-27	0.803657	0.926	0.551	2.31111e-22	3	Cald1	AVC/OFTm	Two-sided Wilcoxon test	0.25	25
1.58769e-58	0.801375	0.752	0.16	3.72852e-54	3	Igfbp4	AVC/OFTm	Two-sided Wilcoxon test	0.25	25
2.23674e-38	0.799583	0.671	0.19	5.25275e-34	3	Tox	AVC/OFTm	Two-sided Wilcoxon test	0.25	25
1.49938e-26	0.798422	0.987	0.552	3.52114e-22	3	Ptprk	AVC/OFTm	Two-sided Wilcoxon test	0.25	25
7.00427e-32	0.797893	0.933	0.422	1.64488e-27	3	Tmem164	AVC/OFTm	Two-sided Wilcoxon test	0.25	25
1.80279e-26	0.797808	0.765	0.315	4.23368e-22	3	Fat3	AVC/OFTm	Two-sided Wilcoxon test	0.25	25
1.16932e-38	0.797236	0.758	0.234	2.74604e-34	3	Pdgfc	AVC/OFTm	Two-sided Wilcoxon test	0.25	25
4.82913e-57	0.795154	0.785	0.187	1.13407e-52	3	Nrip1	AVC/OFTm	Two-sided Wilcoxon test	0.25	25
1.21512e-78	0.794427	0.752	0.119	2.85358e-74	3	Fbn1	AVC/OFTm	Two-sided Wilcoxon test	0.25	25
3.65951e-58	0.794051	0.564	0.085	8.59399e-54	3	Plcl1	AVC/OFTm	Two-sided Wilcoxon test	0.25	25
1.59104e-33	0.791866	0.913	0.386	3.73639e-29	3	Exoc6b	AVC/OFTm	Two-sided Wilcoxon test	0.25	25
2.16714e-40	0.788939	0.819	0.289	5.08932e-36	3	Gse1	AVC/OFTm	Two-sided Wilcoxon test	0.25	25
2.52565e-31	0.786218	0.94	0.506	5.93124e-27	3	Rrbp1	AVC/OFTm	Two-sided Wilcoxon test	0.25	25
3.34487e-103	0.783517	0.53	0.029	7.85508e-99	3	Col26a1	AVC/OFTm	Two-sided Wilcoxon test	0.25	25
5.3997e-25	0.78185	0.866	0.404	1.26807e-20	3	Zeb2	AVC/OFTm	Two-sided Wilcoxon test	0.25	25
1.03145e-28	0.781754	0.94	0.513	2.42225e-24	3	Gnaq	AVC/OFTm	Two-sided Wilcoxon test	0.25	25
2.54469e-35	0.779109	0.456	0.093	5.97596e-31	3	Crabp1	AVC/OFTm	Two-sided Wilcoxon test	0.25	25
5.21157e-38	0.775389	0.691	0.192	1.22388e-33	3	Edil3	AVC/OFTm	Two-sided Wilcoxon test	0.25	25
2.34111e-29	0.770649	0.926	0.463	5.49786e-25	3	Trio	AVC/OFTm	Two-sided Wilcoxon test	0.25	25
3.40589e-31	0.767115	0.98	0.52	7.99839e-27	3	Nf1	AVC/OFTm	Two-sided Wilcoxon test	0.25	25
4.02777e-31	0.766525	0.953	0.472	9.45882e-27	3	Ube2e2	AVC/OFTm	Two-sided Wilcoxon test	0.25	25
1.95131e-30	0.766255	0.893	0.387	4.58246e-26	3	Rfx3	AVC/OFTm	Two-sided Wilcoxon test	0.25	25
2.7231e-21	0.763147	0.879	0.435	6.39494e-17	3	Epha7	AVC/OFTm	Two-sided Wilcoxon test	0.25	25
2.53101e-28	0.761979	0.946	0.465	5.94382e-24	3	Arl15	AVC/OFTm	Two-sided Wilcoxon test	0.25	25
1.01803e-32	0.761733	0.94	0.439	2.39073e-28	3	Phf21a	AVC/OFTm	Two-sided Wilcoxon test	0.25	25
7.85699e-25	0.760511	0.893	0.434	1.84514e-20	3	Wwox	AVC/OFTm	Two-sided Wilcoxon test	0.25	25
7.76169e-69	0.758689	0.671	0.106	1.82276e-64	3	Col11a1	AVC/OFTm	Two-sided Wilcoxon test	0.25	25
9.04578e-36	0.757986	0.852	0.319	2.12431e-31	3	Cadm1	AVC/OFTm	Two-sided Wilcoxon test	0.25	25
3.18921e-67	0.755921	0.651	0.101	7.48954e-63	3	Sema6a	AVC/OFTm	Two-sided Wilcoxon test	0.25	25
8.64483e-87	0.755535	0.685	0.085	2.03015e-82	3	Gli2	AVC/OFTm	Two-sided Wilcoxon test	0.25	25
3.25557e-35	0.755342	0.745	0.252	7.64538e-31	3	Cachd1	AVC/OFTm	Two-sided Wilcoxon test	0.25	25
5.84026e-47	0.754183	0.779	0.214	1.37153e-42	3	Bicc1	AVC/OFTm	Two-sided Wilcoxon test	0.25	25
7.16533e-30	0.753638	0.94	0.469	1.6827e-25	3	Ssbp2	AVC/OFTm	Two-sided Wilcoxon test	0.25	25
1.90893e-33	0.748545	0.953	0.466	4.48293e-29	3	Tcf7l2	AVC/OFTm	Two-sided Wilcoxon test	0.25	25
7.30764e-32	0.748421	0.832	0.337	1.71613e-27	3	Phldb2	AVC/OFTm	Two-sided Wilcoxon test	0.25	25
4.33791e-55	0.746585	0.638	0.123	1.01871e-50	3	Mmp16	AVC/OFTm	Two-sided Wilcoxon test	0.25	25
9.21628e-19	0.739316	0.926	0.744	2.16435e-14	3	Mdk	AVC/OFTm	Two-sided Wilcoxon test	0.25	25
3.56607e-28	0.733415	0.966	0.504	8.37456e-24	3	Akt3	AVC/OFTm	Two-sided Wilcoxon test	0.25	25
2.08892e-28	0.73252	0.94	0.502	4.90563e-24	3	Eml4	AVC/OFTm	Two-sided Wilcoxon test	0.25	25
6.03736e-29	0.731936	0.946	0.469	1.41781e-24	3	Large1	AVC/OFTm	Two-sided Wilcoxon test	0.25	25
1.07026e-22	0.730391	0.96	0.6	2.5134e-18	3	Arih1	AVC/OFTm	Two-sided Wilcoxon test	0.25	25
6.0377e-27	0.729674	0.872	0.452	1.41789e-22	3	Jun	AVC/OFTm	Two-sided Wilcoxon test	0.25	25
2.48943e-46	0.727427	0.282	0.021	5.84617e-42	3	Ppp2r2b	AVC/OFTm	Two-sided Wilcoxon test	0.25	25
2.14081e-42	0.726356	0.383	0.053	5.02749e-38	3	Elmo1	AVC/OFTm	Two-sided Wilcoxon test	0.25	25
2.0448e-55	0.723041	0.436	0.051	4.802e-51	3	Sema3d	AVC/OFTm	Two-sided Wilcoxon test	0.25	25
7.4744e-24	0.722614	0.906	0.459	1.75529e-19	3	Fbxl17	AVC/OFTm	Two-sided Wilcoxon test	0.25	25
9.58771e-39	0.719889	0.893	0.32	2.25158e-34	3	Arid5b	AVC/OFTm	Two-sided Wilcoxon test	0.25	25
3.27291e-28	0.7179	0.886	0.397	7.6861e-24	3	Adgrl2	AVC/OFTm	Two-sided Wilcoxon test	0.25	25
4.11428e-66	0.716879	0.758	0.143	9.66198e-62	3	Srgap1	AVC/OFTm	Two-sided Wilcoxon test	0.25	25
2.2936e-24	0.714613	0.966	0.524	5.3863e-20	3	Dip2c	AVC/OFTm	Two-sided Wilcoxon test	0.25	25
4.77928e-30	0.712735	0.544	0.155	1.12237e-25	3	Vav3	AVC/OFTm	Two-sided Wilcoxon test	0.25	25
1.67294e-48	0.712385	0.765	0.197	3.92874e-44	3	Nnat	AVC/OFTm	Two-sided Wilcoxon test	0.25	25
5.03436e-23	0.712064	0.94	0.512	1.18227e-18	3	Pdzrn3	AVC/OFTm	Two-sided Wilcoxon test	0.25	25
1.8938e-25	0.71123	1	0.684	4.4474e-21	3	Rere	AVC/OFTm	Two-sided Wilcoxon test	0.25	25
3.06881e-46	0.710544	0.819	0.253	7.20679e-42	3	Kirrel	AVC/OFTm	Two-sided Wilcoxon test	0.25	25
2.60268e-45	0.709226	0.805	0.224	6.11213e-41	3	Slit2	AVC/OFTm	Two-sided Wilcoxon test	0.25	25
2.36721e-69	0.709175	0.362	0.02	5.55917e-65	3	Ccbe1	AVC/OFTm	Two-sided Wilcoxon test	0.25	25
4.94048e-26	0.70726	0.933	0.471	1.16022e-21	3	Smg6	AVC/OFTm	Two-sided Wilcoxon test	0.25	25
6.3492e-49	0.703166	0.772	0.204	1.49105e-44	3	Zfp618	AVC/OFTm	Two-sided Wilcoxon test	0.25	25
1.49697e-20	0.701668	0.96	0.581	3.51548e-16	3	Kcnq5	AVC/OFTm	Two-sided Wilcoxon test	0.25	25
1.74498e-81	0.700009	0.443	0.027	4.09791e-77	3	Cped1	AVC/OFTm	Two-sided Wilcoxon test	0.25	25
9.28694e-21	0.699663	1	0.987	2.18095e-16	3	Ptma	AVC/OFTm	Two-sided Wilcoxon test	0.25	25
2.41078e-30	0.699459	0.832	0.356	5.66148e-26	3	Trerf1	AVC/OFTm	Two-sided Wilcoxon test	0.25	25
3.24514e-53	0.699331	0.49	0.07	7.62088e-49	3	Pcdh11x	AVC/OFTm	Two-sided Wilcoxon test	0.25	25
6.61407e-39	0.698796	0.886	0.323	1.55325e-34	3	Myo1b	AVC/OFTm	Two-sided Wilcoxon test	0.25	25
1.96215e-109	0.697936	0.55	0.029	4.60791e-105	3	Fli1	AVC/OFTm	Two-sided Wilcoxon test	0.25	25
1.98723e-29	0.697776	0.812	0.344	4.66682e-25	3	Sox11	AVC/OFTm	Two-sided Wilcoxon test	0.25	25
1.46074e-15	0.696688	0.899	0.497	3.43041e-11	3	Sox6	AVC/OFTm	Two-sided Wilcoxon test	0.25	25
2.10261e-83	0.696575	0.497	0.037	4.93776e-79	3	Sncaip	AVC/OFTm	Two-sided Wilcoxon test	0.25	25
2.61741e-53	0.695357	0.255	0.011	6.14674e-49	3	Nlgn1	AVC/OFTm	Two-sided Wilcoxon test	0.25	25
1.31108e-50	0.693757	0.262	0.014	3.07894e-46	3	Dkk2	AVC/OFTm	Two-sided Wilcoxon test	0.25	25
3.26716e-43	0.69254	0.799	0.23	7.67261e-39	3	Smad6	AVC/OFTm	Two-sided Wilcoxon test	0.25	25
3.50069e-34	0.692521	0.886	0.348	8.22102e-30	3	Cask	AVC/OFTm	Two-sided Wilcoxon test	0.25	25
9.57824e-34	0.691288	0.51	0.122	2.24935e-29	3	Tmem132c	AVC/OFTm	Two-sided Wilcoxon test	0.25	25
1.17727e-22	0.690953	0.96	0.559	2.76471e-18	3	Setbp1	AVC/OFTm	Two-sided Wilcoxon test	0.25	25
1.97101e-26	0.690773	0.973	0.545	4.62872e-22	3	Ptbp2	AVC/OFTm	Two-sided Wilcoxon test	0.25	25
8.60238e-24	0.688788	0.966	0.593	2.02018e-19	3	Foxn3	AVC/OFTm	Two-sided Wilcoxon test	0.25	25
2.13733e-78	0.688747	0.671	0.09	5.0193e-74	3	Crim1	AVC/OFTm	Two-sided Wilcoxon test	0.25	25
6.91098e-88	0.688597	0.604	0.059	1.62297e-83	3	Antxr1	AVC/OFTm	Two-sided Wilcoxon test	0.25	25
7.27486e-20	0.686822	0.966	0.567	1.70843e-15	3	Nbea	AVC/OFTm	Two-sided Wilcoxon test	0.25	25
4.38624e-28	0.686148	0.933	0.424	1.03007e-23	3	Dennd1a	AVC/OFTm	Two-sided Wilcoxon test	0.25	25
1.53098e-35	0.68568	0.913	0.368	3.59536e-31	3	Fndc3a	AVC/OFTm	Two-sided Wilcoxon test	0.25	25
2.53522e-26	0.684795	0.906	0.443	5.95371e-22	3	Kdm5b	AVC/OFTm	Two-sided Wilcoxon test	0.25	25
7.98177e-38	0.683075	0.805	0.253	1.87444e-33	3	Dtl	AVC/OFTm	Two-sided Wilcoxon test	0.25	25
1.54995e-74	0.682839	0.564	0.064	3.6399e-70	3	Rnf150	AVC/OFTm	Two-sided Wilcoxon test	0.25	25
9.08009e-24	0.680655	0.893	0.449	2.13237e-19	3	Ptk2	AVC/OFTm	Two-sided Wilcoxon test	0.25	25
8.85249e-74	0.679016	0.53	0.054	2.07892e-69	3	Samd5	AVC/OFTm	Two-sided Wilcoxon test	0.25	25
4.69566e-27	0.677735	0.832	0.344	1.10273e-22	3	Gab2	AVC/OFTm	Two-sided Wilcoxon test	0.25	25
1.28656e-30	0.676932	0.812	0.3	3.02135e-26	3	Plxdc2	AVC/OFTm	Two-sided Wilcoxon test	0.25	25
2.15458e-24	0.675747	0.96	0.642	5.05983e-20	3	Ankrd11	AVC/OFTm	Two-sided Wilcoxon test	0.25	25
1.51452e-13	0.675352	0.866	0.511	3.55669e-09	3	Alcam	AVC/OFTm	Two-sided Wilcoxon test	0.25	25
2.30647e-27	0.673483	0.946	0.482	5.4165e-23	3	Pds5b	AVC/OFTm	Two-sided Wilcoxon test	0.25	25
6.40093e-45	0.673323	0.792	0.223	1.50319e-40	3	Tns3	AVC/OFTm	Two-sided Wilcoxon test	0.25	25
1.47662e-35	0.671915	0.644	0.182	3.4677e-31	3	Epha4	AVC/OFTm	Two-sided Wilcoxon test	0.25	25
4.6246e-18	0.66965	0.893	0.488	1.08604e-13	3	Tmem108	AVC/OFTm	Two-sided Wilcoxon test	0.25	25
5.34668e-52	0.669177	0.732	0.174	1.25561e-47	3	Dennd2a	AVC/OFTm	Two-sided Wilcoxon test	0.25	25
2.16374e-22	0.666249	0.98	0.701	5.08133e-18	3	Luc7l2	AVC/OFTm	Two-sided Wilcoxon test	0.25	25
9.49171e-30	0.664945	0.872	0.36	2.22903e-25	3	Srgap2	AVC/OFTm	Two-sided Wilcoxon test	0.25	25
5.17648e-48	0.664487	0.342	0.033	1.21564e-43	3	Adgrg6	AVC/OFTm	Two-sided Wilcoxon test	0.25	25
1.44756e-42	0.664137	0.342	0.04	3.39945e-38	3	Tafa2	AVC/OFTm	Two-sided Wilcoxon test	0.25	25
5.37204e-21	0.663502	0.953	0.526	1.26157e-16	3	Zfp521	AVC/OFTm	Two-sided Wilcoxon test	0.25	25
1.01493e-42	0.663196	0.792	0.238	2.38346e-38	3	Tmem131l	AVC/OFTm	Two-sided Wilcoxon test	0.25	25
2.91792e-26	0.662946	0.966	0.524	6.85245e-22	3	Dlg1	AVC/OFTm	Two-sided Wilcoxon test	0.25	25
1.2235e-28	0.661982	0.893	0.424	2.87326e-24	3	Evl	AVC/OFTm	Two-sided Wilcoxon test	0.25	25
4.40782e-23	0.661319	0.98	0.548	1.03513e-18	3	Cdk14	AVC/OFTm	Two-sided Wilcoxon test	0.25	25
3.07258e-57	0.659548	0.51	0.069	7.21565e-53	3	Twist1	AVC/OFTm	Two-sided Wilcoxon test	0.25	25
1.17463e-35	0.659477	0.819	0.283	2.75849e-31	3	Rian	AVC/OFTm	Two-sided Wilcoxon test	0.25	25
1.35541e-65	0.659367	0.503	0.055	3.18306e-61	3	Prrx1	AVC/OFTm	Two-sided Wilcoxon test	0.25	25
1.54356e-29	0.657217	0.51	0.131	3.6249e-25	3	Ctnnd2	AVC/OFTm	Two-sided Wilcoxon test	0.25	25
8.69141e-23	0.656599	0.899	0.446	2.04109e-18	3	Rora	AVC/OFTm	Two-sided Wilcoxon test	0.25	25
4.84132e-23	0.653705	0.973	0.562	1.13693e-18	3	Asap1	AVC/OFTm	Two-sided Wilcoxon test	0.25	25
1.15337e-63	0.653037	0.584	0.084	2.70858e-59	3	Fat4	AVC/OFTm	Two-sided Wilcoxon test	0.25	25
7.27057e-25	0.652328	0.893	0.432	1.70742e-20	3	Nxn	AVC/OFTm	Two-sided Wilcoxon test	0.25	25
1.0601e-22	0.651476	0.819	0.367	2.48954e-18	3	Hs6st2	AVC/OFTm	Two-sided Wilcoxon test	0.25	25
8.47563e-34	0.650969	0.872	0.341	1.99042e-29	3	Smyd3	AVC/OFTm	Two-sided Wilcoxon test	0.25	25
1.78182e-33	0.65062	0.852	0.318	4.18442e-29	3	Pde7a	AVC/OFTm	Two-sided Wilcoxon test	0.25	25
2.92838e-26	0.650423	0.879	0.387	6.877e-22	3	Tle4	AVC/OFTm	Two-sided Wilcoxon test	0.25	25
1.32013e-19	0.650341	0.953	0.612	3.1002e-15	3	Arid4b	AVC/OFTm	Two-sided Wilcoxon test	0.25	25
1.87647e-80	0.649827	0.45	0.029	4.40671e-76	3	Piezo2	AVC/OFTm	Two-sided Wilcoxon test	0.25	25
5.58765e-22	0.648986	0.772	0.319	1.3122e-17	3	Lrrc4	AVC/OFTm	Two-sided Wilcoxon test	0.25	25
9.75951e-30	0.648329	0.94	0.441	2.29192e-25	3	Phf14	AVC/OFTm	Two-sided Wilcoxon test	0.25	25
2.49065e-25	0.647817	0.94	0.486	5.84904e-21	3	Ncoa2	AVC/OFTm	Two-sided Wilcoxon test	0.25	25
1.52588e-48	0.647025	0.718	0.173	3.58339e-44	3	Sh3d19	AVC/OFTm	Two-sided Wilcoxon test	0.25	25
1.03042e-29	0.645121	0.799	0.297	2.41985e-25	3	Bcas3	AVC/OFTm	Two-sided Wilcoxon test	0.25	25
9.84728e-42	0.645066	0.832	0.266	2.31253e-37	3	Flna	AVC/OFTm	Two-sided Wilcoxon test	0.25	25
1.38468e-20	0.643752	0.577	0.209	3.25178e-16	3	Rbfox1	AVC/OFTm	Two-sided Wilcoxon test	0.25	25
2.21595e-21	0.643637	0.893	0.482	5.20394e-17	3	Runx1t1	AVC/OFTm	Two-sided Wilcoxon test	0.25	25
3.64399e-21	0.643296	0.946	0.609	8.55755e-17	3	Nktr	AVC/OFTm	Two-sided Wilcoxon test	0.25	25
8.21302e-38	0.640286	0.349	0.051	1.92875e-33	3	Wt1	AVC/OFTm	Two-sided Wilcoxon test	0.25	25
9.47056e-72	0.639726	0.289	0.007	2.22407e-67	3	Adamts18	AVC/OFTm	Two-sided Wilcoxon test	0.25	25
1.54028e-70	0.638173	0.396	0.026	3.61719e-66	3	Itga8	AVC/OFTm	Two-sided Wilcoxon test	0.25	25
5.39178e-24	0.638073	0.98	0.791	1.26621e-19	3	Rbm39	AVC/OFTm	Two-sided Wilcoxon test	0.25	25
7.69795e-41	0.637361	0.409	0.064	1.80779e-36	3	Kcnb2	AVC/OFTm	Two-sided Wilcoxon test	0.25	25
1.6034e-26	0.635764	0.859	0.386	3.76543e-22	3	Med13l	AVC/OFTm	Two-sided Wilcoxon test	0.25	25
1.2961e-18	0.634546	0.973	0.618	3.04377e-14	3	Mbnl2	AVC/OFTm	Two-sided Wilcoxon test	0.25	25
3.17772e-29	0.634483	0.839	0.354	7.46255e-25	3	Plekha5	AVC/OFTm	Two-sided Wilcoxon test	0.25	25
1.32277e-25	0.633781	0.98	0.701	3.1064e-21	3	Ttc3	AVC/OFTm	Two-sided Wilcoxon test	0.25	25
4.58582e-25	0.632065	0.926	0.463	1.07693e-20	3	Fam172a	AVC/OFTm	Two-sided Wilcoxon test	0.25	25
2.0785e-35	0.631209	0.47	0.097	4.88115e-31	3	Pde5a	AVC/OFTm	Two-sided Wilcoxon test	0.25	25
2.78749e-27	0.631177	0.886	0.39	6.54613e-23	3	Fcho2	AVC/OFTm	Two-sided Wilcoxon test	0.25	25
1.12547e-24	0.630953	0.919	0.501	2.64306e-20	3	Bmpr2	AVC/OFTm	Two-sided Wilcoxon test	0.25	25
9.46911e-18	0.63038	0.94	0.564	2.22373e-13	3	Ppp3ca	AVC/OFTm	Two-sided Wilcoxon test	0.25	25
7.76624e-21	0.629037	0.819	0.389	1.82382e-16	3	Diaph3	AVC/OFTm	Two-sided Wilcoxon test	0.25	25
8.54921e-33	0.627614	0.45	0.096	2.0077e-28	3	Inpp4b	AVC/OFTm	Two-sided Wilcoxon test	0.25	25
2.44974e-18	0.627575	0.993	0.621	5.75296e-14	3	Pard3	AVC/OFTm	Two-sided Wilcoxon test	0.25	25
4.89923e-29	0.627459	0.403	0.086	1.15053e-24	3	Dlg2	AVC/OFTm	Two-sided Wilcoxon test	0.25	25
4.01128e-30	0.626016	0.846	0.356	9.42009e-26	3	Rhobtb3	AVC/OFTm	Two-sided Wilcoxon test	0.25	25
1.00401e-20	0.625855	0.953	0.542	2.35782e-16	3	Rev3l	AVC/OFTm	Two-sided Wilcoxon test	0.25	25
7.41212e-30	0.625538	0.933	0.43	1.74066e-25	3	Fbxo11	AVC/OFTm	Two-sided Wilcoxon test	0.25	25
2.30266e-21	0.625151	0.933	0.523	5.40757e-17	3	Wac	AVC/OFTm	Two-sided Wilcoxon test	0.25	25
5.71114e-30	0.624918	0.913	0.379	1.3412e-25	3	Clk1	AVC/OFTm	Two-sided Wilcoxon test	0.25	25
5.23766e-19	0.624306	0.899	0.489	1.23001e-14	3	Pard3b	AVC/OFTm	Two-sided Wilcoxon test	0.25	25
6.51817e-23	0.624031	0.792	0.355	1.53073e-18	3	Id3	AVC/OFTm	Two-sided Wilcoxon test	0.25	25
8.38242e-105	0.623554	0.53	0.028	1.96853e-100	3	Ddr2	AVC/OFTm	Two-sided Wilcoxon test	0.25	25
4.21601e-36	0.623288	0.745	0.232	9.90089e-32	3	Ankrd44	AVC/OFTm	Two-sided Wilcoxon test	0.25	25
1.94948e-24	0.622148	0.973	0.642	4.57816e-20	3	Gsk3b	AVC/OFTm	Two-sided Wilcoxon test	0.25	25
4.90168e-38	0.621995	0.832	0.272	1.15111e-33	3	Lpin2	AVC/OFTm	Two-sided Wilcoxon test	0.25	25
1.57865e-41	0.621426	0.779	0.244	3.7073e-37	3	Arl5b	AVC/OFTm	Two-sided Wilcoxon test	0.25	25
6.53314e-30	0.619199	0.866	0.36	1.53424e-25	3	Ambra1	AVC/OFTm	Two-sided Wilcoxon test	0.25	25
1.07145e-21	0.618895	0.872	0.434	2.51619e-17	3	Tbc1d5	AVC/OFTm	Two-sided Wilcoxon test	0.25	25
1.43177e-27	0.618649	0.899	0.428	3.36236e-23	3	Agap1	AVC/OFTm	Two-sided Wilcoxon test	0.25	25
1.07183e-22	0.615016	0.872	0.423	2.51709e-18	3	Fgfr2	AVC/OFTm	Two-sided Wilcoxon test	0.25	25
1.5354e-19	0.614128	1	0.749	3.60573e-15	3	Lpp	AVC/OFTm	Two-sided Wilcoxon test	0.25	25
6.3569e-68	0.612689	0.698	0.114	1.49285e-63	3	Asxl3	AVC/OFTm	Two-sided Wilcoxon test	0.25	25
1.19017e-25	0.611876	0.933	0.466	2.79499e-21	3	Hipk2	AVC/OFTm	Two-sided Wilcoxon test	0.25	25
7.40063e-26	0.611075	0.839	0.349	1.73796e-21	3	Znrf3	AVC/OFTm	Two-sided Wilcoxon test	0.25	25
2.36056e-24	0.61017	0.946	0.484	5.54353e-20	3	Spag9	AVC/OFTm	Two-sided Wilcoxon test	0.25	25
3.40565e-29	0.609258	0.859	0.373	7.99782e-25	3	Qrich1	AVC/OFTm	Two-sided Wilcoxon test	0.25	25
2.50169e-87	0.607399	0.557	0.045	5.87496e-83	3	Pdgfra	AVC/OFTm	Two-sided Wilcoxon test	0.25	25
1.2623e-10	0.60671	1	0.962	2.96439e-06	3	Rps15a	AVC/OFTm	Two-sided Wilcoxon test	0.25	25
3.67503e-53	0.604982	0.403	0.043	8.63045e-49	3	Runx2	AVC/OFTm	Two-sided Wilcoxon test	0.25	25
2.83839e-24	0.603939	0.926	0.474	6.66569e-20	3	Gpatch8	AVC/OFTm	Two-sided Wilcoxon test	0.25	25
2.36024e-30	0.60368	0.919	0.396	5.5428e-26	3	Uhrf2	AVC/OFTm	Two-sided Wilcoxon test	0.25	25
2.68429e-31	0.602985	0.805	0.291	6.30378e-27	3	Nr6a1	AVC/OFTm	Two-sided Wilcoxon test	0.25	25
7.62726e-40	0.602888	0.852	0.277	1.79119e-35	3	Pdcd4	AVC/OFTm	Two-sided Wilcoxon test	0.25	25
1.60641e-18	0.602886	0.993	0.717	3.7725e-14	3	Msi2	AVC/OFTm	Two-sided Wilcoxon test	0.25	25
1.88365e-35	0.601901	0.738	0.237	4.42357e-31	3	Bcl11a	AVC/OFTm	Two-sided Wilcoxon test	0.25	25
1.492e-73	0.601173	0.416	0.027	3.50381e-69	3	Ldb2	AVC/OFTm	Two-sided Wilcoxon test	0.25	25
1.46547e-23	0.600909	0.94	0.54	3.44151e-19	3	Crebbp	AVC/OFTm	Two-sided Wilcoxon test	0.25	25
2.07589e-27	0.599931	0.913	0.413	4.87502e-23	3	Kdm6a	AVC/OFTm	Two-sided Wilcoxon test	0.25	25
1.00824e-23	0.599739	0.906	0.439	2.36774e-19	3	Usp3	AVC/OFTm	Two-sided Wilcoxon test	0.25	25
1.10914e-28	0.599417	0.94	0.426	2.60471e-24	3	Epc1	AVC/OFTm	Two-sided Wilcoxon test	0.25	25
2.01863e-27	0.59893	0.859	0.392	4.74056e-23	3	Smurf2	AVC/OFTm	Two-sided Wilcoxon test	0.25	25
9.82461e-45	0.598408	0.664	0.149	2.30721e-40	3	Itga9	AVC/OFTm	Two-sided Wilcoxon test	0.25	25
1.93042e-29	0.597945	0.732	0.253	4.53341e-25	3	Notch2	AVC/OFTm	Two-sided Wilcoxon test	0.25	25
7.88985e-28	0.597095	0.846	0.375	1.85285e-23	3	Tpm4	AVC/OFTm	Two-sided Wilcoxon test	0.25	25
7.08687e-20	0.596546	0.946	0.572	1.66428e-15	3	Phip	AVC/OFTm	Two-sided Wilcoxon test	0.25	25
4.68745e-36	0.596374	0.725	0.217	1.1008e-31	3	Egr1	AVC/OFTm	Two-sided Wilcoxon test	0.25	25
3.36569e-39	0.596215	0.544	0.122	7.90399e-35	3	Pag1	AVC/OFTm	Two-sided Wilcoxon test	0.25	25
6.07823e-63	0.595636	0.503	0.06	1.42741e-58	3	Slc2a13	AVC/OFTm	Two-sided Wilcoxon test	0.25	25
4.58466e-27	0.594835	0.846	0.359	1.07666e-22	3	Ptbp3	AVC/OFTm	Two-sided Wilcoxon test	0.25	25
4.89673e-81	0.594163	0.604	0.064	1.14995e-76	3	Lpar1	AVC/OFTm	Two-sided Wilcoxon test	0.25	25
3.44463e-18	0.593718	0.946	0.563	8.08937e-14	3	Jmjd1c	AVC/OFTm	Two-sided Wilcoxon test	0.25	25
9.20103e-51	0.589505	0.302	0.022	2.16077e-46	3	Cadm2	AVC/OFTm	Two-sided Wilcoxon test	0.25	25
1.17894e-58	0.589394	0.544	0.076	2.76863e-54	3	Dlk1	AVC/OFTm	Two-sided Wilcoxon test	0.25	25
3.9365e-16	0.589158	0.96	0.774	9.24448e-12	3	Peg3	AVC/OFTm	Two-sided Wilcoxon test	0.25	25
1.13022e-17	0.586431	0.96	0.616	2.6542e-13	3	Exoc4	AVC/OFTm	Two-sided Wilcoxon test	0.25	25
8.4723e-22	0.585292	0.919	0.479	1.98964e-17	3	Pds5a	AVC/OFTm	Two-sided Wilcoxon test	0.25	25
1.0201e-49	0.584875	0.309	0.024	2.39561e-45	3	Sorcs1	AVC/OFTm	Two-sided Wilcoxon test	0.25	25
2.46099e-20	0.584155	0.933	0.567	5.77938e-16	3	Pum1	AVC/OFTm	Two-sided Wilcoxon test	0.25	25
7.26252e-25	0.582744	0.859	0.373	1.70553e-20	3	Map4k3	AVC/OFTm	Two-sided Wilcoxon test	0.25	25
4.80487e-17	0.582497	0.913	0.581	1.12838e-12	3	Psme4	AVC/OFTm	Two-sided Wilcoxon test	0.25	25
8.94401e-30	0.582009	0.899	0.388	2.10041e-25	3	Trim33	AVC/OFTm	Two-sided Wilcoxon test	0.25	25
1.62185e-20	0.581124	0.879	0.438	3.80876e-16	3	Apbb2	AVC/OFTm	Two-sided Wilcoxon test	0.25	25
5.4628e-20	0.580904	0.973	0.572	1.28288e-15	3	Snd1	AVC/OFTm	Two-sided Wilcoxon test	0.25	25
2.91753e-19	0.579607	0.852	0.419	6.85154e-15	3	Adamts9	AVC/OFTm	Two-sided Wilcoxon test	0.25	25
3.12439e-27	0.579225	0.906	0.419	7.33731e-23	3	Sec63	AVC/OFTm	Two-sided Wilcoxon test	0.25	25
7.76506e-21	0.578639	0.94	0.637	1.82355e-16	3	Gnb1	AVC/OFTm	Two-sided Wilcoxon test	0.25	25
1.50197e-25	0.578059	0.879	0.442	3.52722e-21	3	Cnn3	AVC/OFTm	Two-sided Wilcoxon test	0.25	25
1.68133e-24	0.577897	0.926	0.476	3.94845e-20	3	Chd6	AVC/OFTm	Two-sided Wilcoxon test	0.25	25
3.91112e-20	0.577687	0.993	0.879	9.18488e-16	3	H3f3b	AVC/OFTm	Two-sided Wilcoxon test	0.25	25
8.37879e-92	0.577118	0.523	0.037	1.96767e-87	3	Clmp	AVC/OFTm	Two-sided Wilcoxon test	0.25	25
6.85902e-25	0.577041	0.826	0.36	1.61077e-20	3	Gm4258	AVC/OFTm	Two-sided Wilcoxon test	0.25	25
1.61366e-14	0.576852	0.752	0.384	3.78952e-10	3	Plxna4	AVC/OFTm	Two-sided Wilcoxon test	0.25	25
6.67389e-23	0.5764	0.926	0.464	1.5673e-18	3	Nsmce2	AVC/OFTm	Two-sided Wilcoxon test	0.25	25
1.1863e-84	0.574835	0.638	0.072	2.7859e-80	3	Dapk1	AVC/OFTm	Two-sided Wilcoxon test	0.25	25
2.09682e-18	0.57236	0.919	0.628	4.92417e-14	3	Tut4	AVC/OFTm	Two-sided Wilcoxon test	0.25	25
1.06385e-30	0.570866	0.826	0.31	2.49835e-26	3	Supt3	AVC/OFTm	Two-sided Wilcoxon test	0.25	25
2.04814e-26	0.569556	0.879	0.398	4.80985e-22	3	Lcorl	AVC/OFTm	Two-sided Wilcoxon test	0.25	25
4.48414e-22	0.568916	0.812	0.374	1.05306e-17	3	Colec12	AVC/OFTm	Two-sided Wilcoxon test	0.25	25
1.71508e-25	0.568362	0.832	0.356	4.02769e-21	3	Tbl1xr1	AVC/OFTm	Two-sided Wilcoxon test	0.25	25
6.31643e-31	0.568286	0.879	0.346	1.48335e-26	3	Cbfa2t2	AVC/OFTm	Two-sided Wilcoxon test	0.25	25
2.00364e-25	0.568276	0.866	0.387	4.70534e-21	3	Slc4a7	AVC/OFTm	Two-sided Wilcoxon test	0.25	25
5.57207e-22	0.567554	0.953	0.621	1.30854e-17	3	Fubp1	AVC/OFTm	Two-sided Wilcoxon test	0.25	25
6.55732e-55	0.567476	0.564	0.092	1.53992e-50	3	Myo1d	AVC/OFTm	Two-sided Wilcoxon test	0.25	25
5.38589e-20	0.56677	0.758	0.336	1.26482e-15	3	Tgfb2	AVC/OFTm	Two-sided Wilcoxon test	0.25	25
9.60054e-32	0.566634	0.537	0.137	2.25459e-27	3	Nrk	AVC/OFTm	Two-sided Wilcoxon test	0.25	25
7.2009e-16	0.56612	0.879	0.507	1.69106e-11	3	Mcc	AVC/OFTm	Two-sided Wilcoxon test	0.25	25
7.23918e-36	0.566093	0.799	0.261	1.70005e-31	3	Cep112	AVC/OFTm	Two-sided Wilcoxon test	0.25	25
6.91422e-16	0.565804	0.792	0.376	1.62374e-11	3	5330438D12Rik	AVC/OFTm	Two-sided Wilcoxon test	0.25	25
8.30148e-18	0.565707	0.953	0.595	1.94952e-13	3	Nipbl	AVC/OFTm	Two-sided Wilcoxon test	0.25	25
5.93905e-50	0.565275	0.631	0.13	1.39473e-45	3	Lima1	AVC/OFTm	Two-sided Wilcoxon test	0.25	25
9.48736e-44	0.564682	0.691	0.172	2.22801e-39	3	Rnf130	AVC/OFTm	Two-sided Wilcoxon test	0.25	25
2.66689e-27	0.563935	0.369	0.075	6.26292e-23	3	Negr1	AVC/OFTm	Two-sided Wilcoxon test	0.25	25
9.86512e-23	0.563648	0.852	0.411	2.31672e-18	3	Rapgef2	AVC/OFTm	Two-sided Wilcoxon test	0.25	25
6.71956e-22	0.563332	0.899	0.446	1.57802e-17	3	Arid2	AVC/OFTm	Two-sided Wilcoxon test	0.25	25
1.18221e-34	0.562812	0.866	0.329	2.7763e-30	3	Yeats2	AVC/OFTm	Two-sided Wilcoxon test	0.25	25
1.33041e-17	0.562407	0.96	0.613	3.12433e-13	3	Zfand3	AVC/OFTm	Two-sided Wilcoxon test	0.25	25
1.89902e-23	0.562108	0.866	0.414	4.45965e-19	3	Asxl1	AVC/OFTm	Two-sided Wilcoxon test	0.25	25
1.50066e-43	0.561376	0.577	0.127	3.52414e-39	3	Tspan5	AVC/OFTm	Two-sided Wilcoxon test	0.25	25
3.27955e-23	0.561347	0.859	0.406	7.7017e-19	3	Tmcc1	AVC/OFTm	Two-sided Wilcoxon test	0.25	25
2.91158e-20	0.56108	0.966	0.696	6.83756e-16	3	Sfpq	AVC/OFTm	Two-sided Wilcoxon test	0.25	25
5.0746e-18	0.561073	0.953	0.564	1.19172e-13	3	Srek1	AVC/OFTm	Two-sided Wilcoxon test	0.25	25
1.4781e-27	0.560175	0.859	0.366	3.47116e-23	3	Sh3bgrl	AVC/OFTm	Two-sided Wilcoxon test	0.25	25
2.72603e-29	0.558844	0.819	0.311	6.4018e-25	3	Osbpl9	AVC/OFTm	Two-sided Wilcoxon test	0.25	25
3.6144e-68	0.558469	0.49	0.048	8.48805e-64	3	Fbln2	AVC/OFTm	Two-sided Wilcoxon test	0.25	25
1.92272e-35	0.557663	0.342	0.05	4.51531e-31	3	Nkain2	AVC/OFTm	Two-sided Wilcoxon test	0.25	25
1.04562e-20	0.557579	0.953	0.501	2.45553e-16	3	Mbd5	AVC/OFTm	Two-sided Wilcoxon test	0.25	25
9.12196e-20	0.557435	0.953	0.522	2.1422e-15	3	Etv6	AVC/OFTm	Two-sided Wilcoxon test	0.25	25
3.23945e-24	0.557233	0.859	0.379	7.60753e-20	3	Spred1	AVC/OFTm	Two-sided Wilcoxon test	0.25	25
2.45597e-23	0.55685	0.772	0.35	5.7676e-19	3	Sox4	AVC/OFTm	Two-sided Wilcoxon test	0.25	25
5.40364e-19	0.556449	0.94	0.564	1.26899e-14	3	Fndc3b	AVC/OFTm	Two-sided Wilcoxon test	0.25	25
2.32084e-23	0.55644	0.872	0.405	5.45026e-19	3	Dnajc1	AVC/OFTm	Two-sided Wilcoxon test	0.25	25
2.49446e-19	0.556196	0.933	0.518	5.85799e-15	3	Lims1	AVC/OFTm	Two-sided Wilcoxon test	0.25	25
3.01456e-19	0.555731	0.946	0.564	7.07939e-15	3	Tnks	AVC/OFTm	Two-sided Wilcoxon test	0.25	25
2.39514e-31	0.555066	0.839	0.339	5.62474e-27	3	Cbfb	AVC/OFTm	Two-sided Wilcoxon test	0.25	25
4.90208e-36	0.554759	0.705	0.222	1.1512e-31	3	Ubtd2	AVC/OFTm	Two-sided Wilcoxon test	0.25	25
3.77861e-21	0.554691	0.805	0.417	8.87369e-17	3	H2afy	AVC/OFTm	Two-sided Wilcoxon test	0.25	25
8.0487e-23	0.554098	0.893	0.43	1.89016e-18	3	Cop1	AVC/OFTm	Two-sided Wilcoxon test	0.25	25
5.19986e-24	0.553883	0.732	0.297	1.22114e-19	3	Id1	AVC/OFTm	Two-sided Wilcoxon test	0.25	25
7.43743e-24	0.553393	0.913	0.469	1.7466e-19	3	Brd4	AVC/OFTm	Two-sided Wilcoxon test	0.25	25
1.49989e-38	0.551591	0.705	0.198	3.52235e-34	3	Flnb	AVC/OFTm	Two-sided Wilcoxon test	0.25	25
7.01005e-33	0.551381	0.758	0.255	1.64624e-28	3	Fyn	AVC/OFTm	Two-sided Wilcoxon test	0.25	25
2.70482e-25	0.551324	0.866	0.407	6.352e-21	3	Mbtd1	AVC/OFTm	Two-sided Wilcoxon test	0.25	25
9.05576e-15	0.551305	0.973	0.665	2.12666e-10	3	Zbtb20	AVC/OFTm	Two-sided Wilcoxon test	0.25	25
1.99501e-19	0.550777	0.933	0.534	4.68508e-15	3	Erbin	AVC/OFTm	Two-sided Wilcoxon test	0.25	25
1.63145e-22	0.550622	0.866	0.398	3.83129e-18	3	Aopep	AVC/OFTm	Two-sided Wilcoxon test	0.25	25
7.0989e-20	0.548183	0.893	0.54	1.6671e-15	3	Igf2bp3	AVC/OFTm	Two-sided Wilcoxon test	0.25	25
2.5533e-48	0.54794	0.631	0.131	5.99618e-44	3	Fam110b	AVC/OFTm	Two-sided Wilcoxon test	0.25	25
4.0096e-34	0.547832	0.758	0.247	9.41614e-30	3	Map3k3	AVC/OFTm	Two-sided Wilcoxon test	0.25	25
1.35233e-32	0.547481	0.792	0.261	3.1758e-28	3	Rad51b	AVC/OFTm	Two-sided Wilcoxon test	0.25	25
7.7059e-59	0.546868	0.597	0.094	1.80965e-54	3	Shroom4	AVC/OFTm	Two-sided Wilcoxon test	0.25	25
4.92938e-25	0.546489	0.617	0.204	1.15762e-20	3	Plce1	AVC/OFTm	Two-sided Wilcoxon test	0.25	25
2.74669e-16	0.546221	1	0.673	6.45032e-12	3	Magi1	AVC/OFTm	Two-sided Wilcoxon test	0.25	25
5.62485e-67	0.546221	0.49	0.051	1.32094e-62	3	Plekhg1	AVC/OFTm	Two-sided Wilcoxon test	0.25	25
1.82163e-24	0.546218	0.879	0.408	4.27792e-20	3	Chd1	AVC/OFTm	Two-sided Wilcoxon test	0.25	25
1.32697e-32	0.546156	0.738	0.239	3.11625e-28	3	Parp8	AVC/OFTm	Two-sided Wilcoxon test	0.25	25
9.61595e-20	0.545793	0.893	0.458	2.25821e-15	3	Cers6	AVC/OFTm	Two-sided Wilcoxon test	0.25	25
9.46043e-20	0.543728	0.893	0.474	2.22169e-15	3	Zfp148	AVC/OFTm	Two-sided Wilcoxon test	0.25	25
2.42571e-24	0.543248	0.913	0.425	5.69653e-20	3	Sppl3	AVC/OFTm	Two-sided Wilcoxon test	0.25	25
1.71026e-51	0.542782	0.517	0.082	4.01638e-47	3	Iqgap2	AVC/OFTm	Two-sided Wilcoxon test	0.25	25
9.20773e-36	0.542615	0.799	0.269	2.16234e-31	3	Zfp532	AVC/OFTm	Two-sided Wilcoxon test	0.25	25
1.01023e-46	0.541636	0.611	0.128	2.37244e-42	3	Man2a1	AVC/OFTm	Two-sided Wilcoxon test	0.25	25
4.8952e-25	0.540393	0.376	0.086	1.14959e-20	3	Rapgef5	AVC/OFTm	Two-sided Wilcoxon test	0.25	25
6.41949e-46	0.539294	0.255	0.016	1.50755e-41	3	Ntrk3	AVC/OFTm	Two-sided Wilcoxon test	0.25	25
8.98148e-27	0.538789	0.691	0.239	2.10921e-22	3	Col18a1	AVC/OFTm	Two-sided Wilcoxon test	0.25	25
4.65855e-26	0.538658	0.859	0.357	1.09401e-21	3	Ankrd28	AVC/OFTm	Two-sided Wilcoxon test	0.25	25
1.39304e-20	0.537071	0.94	0.515	3.2714e-16	3	Igf2bp2	AVC/OFTm	Two-sided Wilcoxon test	0.25	25
4.60042e-17	0.536969	0.946	0.602	1.08036e-12	3	Zfp292	AVC/OFTm	Two-sided Wilcoxon test	0.25	25
2.18332e-19	0.5362	0.913	0.502	5.12731e-15	3	Wdfy3	AVC/OFTm	Two-sided Wilcoxon test	0.25	25
2.71874e-27	0.535734	0.812	0.307	6.38468e-23	3	Stat3	AVC/OFTm	Two-sided Wilcoxon test	0.25	25
9.82386e-27	0.534917	0.933	0.43	2.30703e-22	3	Mpdz	AVC/OFTm	Two-sided Wilcoxon test	0.25	25
5.87709e-20	0.53457	0.926	0.559	1.38018e-15	3	Eif4g3	AVC/OFTm	Two-sided Wilcoxon test	0.25	25
2.71747e-25	0.532325	0.785	0.322	6.3817e-21	3	AW554918	AVC/OFTm	Two-sided Wilcoxon test	0.25	25
4.74807e-15	0.531052	0.98	0.661	1.11504e-10	3	Ankrd17	AVC/OFTm	Two-sided Wilcoxon test	0.25	25
2.4572e-22	0.530082	0.785	0.365	5.77049e-18	3	Ifitm2	AVC/OFTm	Two-sided Wilcoxon test	0.25	25
5.23104e-23	0.530034	0.866	0.409	1.22846e-18	3	Tgfbr1	AVC/OFTm	Two-sided Wilcoxon test	0.25	25
3.63904e-17	0.529666	0.879	0.553	8.54593e-13	3	H2afv	AVC/OFTm	Two-sided Wilcoxon test	0.25	25
1.16384e-26	0.528347	0.832	0.354	2.73315e-22	3	Atf2	AVC/OFTm	Two-sided Wilcoxon test	0.25	25
6.90368e-26	0.527274	0.792	0.324	1.62126e-21	3	Mpp5	AVC/OFTm	Two-sided Wilcoxon test	0.25	25
1.78144e-24	0.526229	0.819	0.348	4.18353e-20	3	Fnip1	AVC/OFTm	Two-sided Wilcoxon test	0.25	25
3.42963e-31	0.525338	0.832	0.302	8.05415e-27	3	Dis3l2	AVC/OFTm	Two-sided Wilcoxon test	0.25	25
2.2982e-20	0.52491	0.926	0.493	5.39709e-16	3	Rsrc1	AVC/OFTm	Two-sided Wilcoxon test	0.25	25
2.99032e-24	0.524774	0.899	0.39	7.02247e-20	3	Ptpn4	AVC/OFTm	Two-sided Wilcoxon test	0.25	25
9.21372e-20	0.524661	0.658	0.271	2.16375e-15	3	Frmd4b	AVC/OFTm	Two-sided Wilcoxon test	0.25	25
3.58212e-16	0.524622	0.899	0.5	8.41225e-12	3	Ror2	AVC/OFTm	Two-sided Wilcoxon test	0.25	25
7.4623e-26	0.52391	0.718	0.255	1.75245e-21	3	Fhit	AVC/OFTm	Two-sided Wilcoxon test	0.25	25
3.37149e-21	0.523488	0.926	0.493	7.91761e-17	3	Ccdc88a	AVC/OFTm	Two-sided Wilcoxon test	0.25	25
1.6218e-27	0.523092	0.805	0.327	3.80864e-23	3	Hdgfl3	AVC/OFTm	Two-sided Wilcoxon test	0.25	25
1.07137e-33	0.523021	0.725	0.234	2.51601e-29	3	Esyt2	AVC/OFTm	Two-sided Wilcoxon test	0.25	25
2.03374e-25	0.522903	0.852	0.367	4.77605e-21	3	Arhgap35	AVC/OFTm	Two-sided Wilcoxon test	0.25	25
5.53991e-27	0.52252	0.846	0.353	1.30099e-22	3	Brd8	AVC/OFTm	Two-sided Wilcoxon test	0.25	25
1.57636e-22	0.522337	0.839	0.389	3.70192e-18	3	Myef2	AVC/OFTm	Two-sided Wilcoxon test	0.25	25
6.345e-18	0.522203	0.933	0.539	1.49006e-13	3	Dyrk1a	AVC/OFTm	Two-sided Wilcoxon test	0.25	25
4.01832e-36	0.521687	0.664	0.189	9.43663e-32	3	Tnfaip8	AVC/OFTm	Two-sided Wilcoxon test	0.25	25
1.58574e-21	0.521644	0.906	0.455	3.72395e-17	3	Fto	AVC/OFTm	Two-sided Wilcoxon test	0.25	25
9.09364e-30	0.520568	0.805	0.307	2.13555e-25	3	Rnf38	AVC/OFTm	Two-sided Wilcoxon test	0.25	25
2.56007e-18	0.520565	0.698	0.298	6.01207e-14	3	Gm37240	AVC/OFTm	Two-sided Wilcoxon test	0.25	25
4.06983e-18	0.520484	0.899	0.54	9.5576e-14	3	Setd5	AVC/OFTm	Two-sided Wilcoxon test	0.25	25
4.96024e-35	0.520045	0.503	0.107	1.16486e-30	3	Tnc	AVC/OFTm	Two-sided Wilcoxon test	0.25	25
3.33528e-29	0.519921	0.819	0.31	7.83256e-25	3	Etl4	AVC/OFTm	Two-sided Wilcoxon test	0.25	25
7.99769e-29	0.519164	0.785	0.284	1.87818e-24	3	Tiam1	AVC/OFTm	Two-sided Wilcoxon test	0.25	25
4.28563e-18	0.519031	0.96	0.559	1.00644e-13	3	Kmt2c	AVC/OFTm	Two-sided Wilcoxon test	0.25	25
7.4652e-21	0.518453	0.926	0.452	1.75313e-16	3	Zfp280d	AVC/OFTm	Two-sided Wilcoxon test	0.25	25
8.16335e-33	0.517377	0.772	0.265	1.91708e-28	3	Map3k2	AVC/OFTm	Two-sided Wilcoxon test	0.25	25
2.54834e-26	0.516982	0.651	0.234	5.98453e-22	3	Cd24a	AVC/OFTm	Two-sided Wilcoxon test	0.25	25
1.27567e-52	0.51686	0.597	0.105	2.99578e-48	3	Gucy1a2	AVC/OFTm	Two-sided Wilcoxon test	0.25	25
1.79004e-17	0.515641	0.946	0.592	4.20373e-13	3	Zfp644	AVC/OFTm	Two-sided Wilcoxon test	0.25	25
6.4779e-22	0.514059	0.678	0.267	1.52127e-17	3	Tenm2	AVC/OFTm	Two-sided Wilcoxon test	0.25	25
1.01352e-18	0.513961	0.906	0.497	2.38014e-14	3	Luzp1	AVC/OFTm	Two-sided Wilcoxon test	0.25	25
1.20841e-35	0.513895	0.732	0.234	2.83783e-31	3	Ptbp1	AVC/OFTm	Two-sided Wilcoxon test	0.25	25
2.18516e-71	0.512876	0.49	0.046	5.13163e-67	3	Klhl29	AVC/OFTm	Two-sided Wilcoxon test	0.25	25
4.30128e-25	0.512808	0.611	0.201	1.01011e-20	3	Plcb1	AVC/OFTm	Two-sided Wilcoxon test	0.25	25
1.11799e-17	0.512096	0.913	0.552	2.62548e-13	3	Cdk4	AVC/OFTm	Two-sided Wilcoxon test	0.25	25
1.26054e-53	0.511494	0.644	0.119	2.96024e-49	3	Ust	AVC/OFTm	Two-sided Wilcoxon test	0.25	25
2.05756e-29	0.510889	0.617	0.19	4.83198e-25	3	Plxna2	AVC/OFTm	Two-sided Wilcoxon test	0.25	25
1.33431e-50	0.510761	0.436	0.054	3.1335e-46	3	Igf1	AVC/OFTm	Two-sided Wilcoxon test	0.25	25
1.51521e-19	0.510739	0.846	0.418	3.55833e-15	3	Rlim	AVC/OFTm	Two-sided Wilcoxon test	0.25	25
4.62474e-17	0.510611	0.919	0.532	1.08607e-12	3	Phf3	AVC/OFTm	Two-sided Wilcoxon test	0.25	25
3.64284e-42	0.510512	0.577	0.127	8.55485e-38	3	Gas1	AVC/OFTm	Two-sided Wilcoxon test	0.25	25
6.14671e-21	0.509629	0.866	0.436	1.44349e-16	3	Braf	AVC/OFTm	Two-sided Wilcoxon test	0.25	25
1.32717e-18	0.509543	0.859	0.462	3.11672e-14	3	Cnot2	AVC/OFTm	Two-sided Wilcoxon test	0.25	25
1.41427e-33	0.509534	0.597	0.157	3.32126e-29	3	Naaladl2	AVC/OFTm	Two-sided Wilcoxon test	0.25	25
5.72402e-27	0.509533	0.812	0.313	1.34423e-22	3	Fam135a	AVC/OFTm	Two-sided Wilcoxon test	0.25	25
4.04642e-31	0.509419	0.819	0.312	9.50261e-27	3	Cspp1	AVC/OFTm	Two-sided Wilcoxon test	0.25	25
2.55869e-25	0.508434	0.832	0.348	6.00882e-21	3	Fbxw11	AVC/OFTm	Two-sided Wilcoxon test	0.25	25
1.6576e-20	0.508394	0.886	0.46	3.89271e-16	3	Rsf1	AVC/OFTm	Two-sided Wilcoxon test	0.25	25
3.72175e-27	0.507336	0.859	0.354	8.74017e-23	3	Epb41l2	AVC/OFTm	Two-sided Wilcoxon test	0.25	25
2.84136e-30	0.507287	0.732	0.25	6.67265e-26	3	Rarb	AVC/OFTm	Two-sided Wilcoxon test	0.25	25
1.17225e-15	0.507255	0.799	0.422	2.75291e-11	3	Lgals1	AVC/OFTm	Two-sided Wilcoxon test	0.25	25
1.06993e-10	0.505884	0.96	0.864	2.51261e-06	3	Rps19	AVC/OFTm	Two-sided Wilcoxon test	0.25	25
1.1487e-21	0.505854	0.396	0.105	2.6976e-17	3	Zfp536	AVC/OFTm	Two-sided Wilcoxon test	0.25	25
2.45186e-55	0.505627	0.55	0.087	5.75795e-51	3	Tle1	AVC/OFTm	Two-sided Wilcoxon test	0.25	25
1.09144e-21	0.504044	0.826	0.382	2.56314e-17	3	Mast2	AVC/OFTm	Two-sided Wilcoxon test	0.25	25
1.15363e-16	0.503659	0.899	0.518	2.70919e-12	3	Tnrc6a	AVC/OFTm	Two-sided Wilcoxon test	0.25	25
3.11307e-32	0.503597	0.772	0.269	7.31072e-28	3	Nrf1	AVC/OFTm	Two-sided Wilcoxon test	0.25	25
1.76381e-19	0.503215	0.819	0.388	4.14212e-15	3	Prkd1	AVC/OFTm	Two-sided Wilcoxon test	0.25	25
7.30315e-42	0.50164	0.711	0.18	1.71507e-37	3	Crebrf	AVC/OFTm	Two-sided Wilcoxon test	0.25	25
7.50613e-15	0.50061	0.893	0.496	1.76274e-10	3	Slc38a2	AVC/OFTm	Two-sided Wilcoxon test	0.25	25
5.79153e-38	0.500431	0.711	0.209	1.36008e-33	3	Fscn1	AVC/OFTm	Two-sided Wilcoxon test	0.25	25
1.21369e-20	0.499814	0.96	0.529	2.85024e-16	3	Cpsf6	AVC/OFTm	Two-sided Wilcoxon test	0.25	25
1.22181e-24	0.499637	0.765	0.306	2.86929e-20	3	Mapk8	AVC/OFTm	Two-sided Wilcoxon test	0.25	25
6.81225e-27	0.498897	0.866	0.345	1.59979e-22	3	Fam13b	AVC/OFTm	Two-sided Wilcoxon test	0.25	25
7.22162e-22	0.498773	0.919	0.443	1.69593e-17	3	Stk3	AVC/OFTm	Two-sided Wilcoxon test	0.25	25
3.75225e-21	0.498261	0.57	0.196	8.81177e-17	3	Frem1	AVC/OFTm	Two-sided Wilcoxon test	0.25	25
2.37798e-18	0.49782	0.94	0.571	5.58445e-14	3	Tra2b	AVC/OFTm	Two-sided Wilcoxon test	0.25	25
5.17581e-36	0.49781	0.765	0.247	1.21549e-31	3	Vgll4	AVC/OFTm	Two-sided Wilcoxon test	0.25	25
2.85955e-43	0.497667	0.711	0.182	6.71536e-39	3	Prdm5	AVC/OFTm	Two-sided Wilcoxon test	0.25	25
2.64347e-15	0.497002	0.96	0.652	6.20792e-11	3	Rbm25	AVC/OFTm	Two-sided Wilcoxon test	0.25	25
5.82987e-53	0.4967	0.671	0.134	1.36909e-48	3	Foxp4	AVC/OFTm	Two-sided Wilcoxon test	0.25	25
3.31634e-20	0.496589	0.879	0.425	7.78809e-16	3	Cblb	AVC/OFTm	Two-sided Wilcoxon test	0.25	25
4.26405e-18	0.4961	0.872	0.469	1.00137e-13	3	Cnot4	AVC/OFTm	Two-sided Wilcoxon test	0.25	25
5.64636e-18	0.495801	0.839	0.427	1.32599e-13	3	Nhsl2	AVC/OFTm	Two-sided Wilcoxon test	0.25	25
2.01643e-17	0.495427	0.966	0.578	4.73538e-13	3	Tanc2	AVC/OFTm	Two-sided Wilcoxon test	0.25	25
1.17746e-19	0.494815	0.906	0.451	2.76515e-15	3	Med13	AVC/OFTm	Two-sided Wilcoxon test	0.25	25
9.09427e-19	0.494674	0.919	0.485	2.1357e-14	3	Atad2b	AVC/OFTm	Two-sided Wilcoxon test	0.25	25
1.2455e-24	0.494295	0.852	0.37	2.92493e-20	3	Vti1a	AVC/OFTm	Two-sided Wilcoxon test	0.25	25
4.06524e-35	0.494103	0.765	0.236	9.5468e-31	3	Pde3b	AVC/OFTm	Two-sided Wilcoxon test	0.25	25
1.13741e-25	0.494012	0.839	0.347	2.6711e-21	3	Csnk1g1	AVC/OFTm	Two-sided Wilcoxon test	0.25	25
1.73008e-44	0.493797	0.678	0.163	4.06293e-40	3	Cdk19	AVC/OFTm	Two-sided Wilcoxon test	0.25	25
6.82247e-29	0.493517	0.617	0.193	1.60219e-24	3	Pls3	AVC/OFTm	Two-sided Wilcoxon test	0.25	25
4.93727e-50	0.493169	0.336	0.029	1.15947e-45	3	Ccser1	AVC/OFTm	Two-sided Wilcoxon test	0.25	25
7.20253e-19	0.492604	0.799	0.38	1.69144e-14	3	Pola1	AVC/OFTm	Two-sided Wilcoxon test	0.25	25
2.34132e-25	0.492576	0.658	0.235	5.49837e-21	3	Kctd1	AVC/OFTm	Two-sided Wilcoxon test	0.25	25
4.17321e-20	0.492561	0.886	0.458	9.80038e-16	3	Scaf8	AVC/OFTm	Two-sided Wilcoxon test	0.25	25
7.48859e-15	0.492263	0.872	0.518	1.75862e-10	3	Aff4	AVC/OFTm	Two-sided Wilcoxon test	0.25	25
1.99834e-36	0.492149	0.732	0.224	4.6929e-32	3	H13	AVC/OFTm	Two-sided Wilcoxon test	0.25	25
7.63142e-14	0.491436	0.946	0.563	1.79216e-09	3	Strbp	AVC/OFTm	Two-sided Wilcoxon test	0.25	25
4.85172e-32	0.491364	0.839	0.308	1.13938e-27	3	Spred2	AVC/OFTm	Two-sided Wilcoxon test	0.25	25
3.85769e-82	0.491286	0.57	0.053	9.0594e-78	3	Arnt2	AVC/OFTm	Two-sided Wilcoxon test	0.25	25
2.88093e-31	0.491269	0.805	0.292	6.76557e-27	3	Eps15l1	AVC/OFTm	Two-sided Wilcoxon test	0.25	25
6.9268e-54	0.490705	0.51	0.072	1.62669e-49	3	A230057D06Rik	AVC/OFTm	Two-sided Wilcoxon test	0.25	25
6.16227e-20	0.489931	0.879	0.41	1.44715e-15	3	Psd3	AVC/OFTm	Two-sided Wilcoxon test	0.25	25
4.25641e-21	0.489652	0.886	0.422	9.99575e-17	3	Kcmf1	AVC/OFTm	Two-sided Wilcoxon test	0.25	25
3.33763e-41	0.489476	0.758	0.201	7.83809e-37	3	Myo10	AVC/OFTm	Two-sided Wilcoxon test	0.25	25
2.43177e-24	0.489366	0.799	0.318	5.71077e-20	3	Smad7	AVC/OFTm	Two-sided Wilcoxon test	0.25	25
4.81974e-17	0.488764	0.846	0.454	1.13187e-12	3	Zfp704	AVC/OFTm	Two-sided Wilcoxon test	0.25	25
4.95693e-19	0.488362	0.832	0.407	1.16409e-14	3	Rab5a	AVC/OFTm	Two-sided Wilcoxon test	0.25	25
1.42045e-20	0.48769	0.832	0.39	3.33578e-16	3	Sik3	AVC/OFTm	Two-sided Wilcoxon test	0.25	25
1.2318e-24	0.486972	0.792	0.332	2.89275e-20	3	Tcf20	AVC/OFTm	Two-sided Wilcoxon test	0.25	25
2.5607e-21	0.48695	0.906	0.452	6.01354e-17	3	Rlf	AVC/OFTm	Two-sided Wilcoxon test	0.25	25
7.69187e-22	0.486868	0.872	0.411	1.80636e-17	3	Xpo7	AVC/OFTm	Two-sided Wilcoxon test	0.25	25
4.51754e-21	0.486439	0.852	0.403	1.0609e-16	3	Pan3	AVC/OFTm	Two-sided Wilcoxon test	0.25	25
9.69348e-15	0.486048	0.946	0.676	2.27642e-10	3	Nasp	AVC/OFTm	Two-sided Wilcoxon test	0.25	25
6.91085e-22	0.485274	0.779	0.332	1.62294e-17	3	Tfdp2	AVC/OFTm	Two-sided Wilcoxon test	0.25	25
3.65717e-18	0.484715	0.852	0.419	8.58849e-14	3	Mbnl1	AVC/OFTm	Two-sided Wilcoxon test	0.25	25
1.83181e-29	0.484272	0.678	0.222	4.30183e-25	3	Zbtb11	AVC/OFTm	Two-sided Wilcoxon test	0.25	25
2.61157e-21	0.484003	0.832	0.363	6.13301e-17	3	Nup153	AVC/OFTm	Two-sided Wilcoxon test	0.25	25
1.58608e-22	0.482599	0.846	0.393	3.72474e-18	3	Rngtt	AVC/OFTm	Two-sided Wilcoxon test	0.25	25
2.66773e-14	0.48204	0.973	0.649	6.2649e-10	3	Enah	AVC/OFTm	Two-sided Wilcoxon test	0.25	25
1.35692e-21	0.481704	0.799	0.346	3.18658e-17	3	Zzz3	AVC/OFTm	Two-sided Wilcoxon test	0.25	25
1.0928e-16	0.481696	0.987	0.673	2.56634e-12	3	Strn3	AVC/OFTm	Two-sided Wilcoxon test	0.25	25
6.01785e-17	0.480126	0.94	0.529	1.41323e-12	3	Trpm7	AVC/OFTm	Two-sided Wilcoxon test	0.25	25
9.82956e-33	0.479968	0.772	0.245	2.30837e-28	3	Fbxw7	AVC/OFTm	Two-sided Wilcoxon test	0.25	25
8.8514e-30	0.479705	0.846	0.332	2.07866e-25	3	Zdhhc20	AVC/OFTm	Two-sided Wilcoxon test	0.25	25
5.29691e-59	0.478974	0.51	0.065	1.24393e-54	3	Ets1	AVC/OFTm	Two-sided Wilcoxon test	0.25	25
2.46138e-17	0.477518	0.812	0.395	5.78031e-13	3	Pde3a	AVC/OFTm	Two-sided Wilcoxon test	0.25	25
1.45587e-69	0.477097	0.49	0.049	3.41896e-65	3	Tes	AVC/OFTm	Two-sided Wilcoxon test	0.25	25
9.18015e-35	0.476386	0.678	0.198	2.15587e-30	3	Sash1	AVC/OFTm	Two-sided Wilcoxon test	0.25	25
1.68885e-17	0.476273	0.839	0.42	3.9661e-13	3	Nsd3	AVC/OFTm	Two-sided Wilcoxon test	0.25	25
3.60591e-16	0.476128	0.966	0.658	8.46811e-12	3	Cux1	AVC/OFTm	Two-sided Wilcoxon test	0.25	25
3.81658e-28	0.475985	0.711	0.25	8.96286e-24	3	Nck2	AVC/OFTm	Two-sided Wilcoxon test	0.25	25
4.31749e-27	0.475896	0.758	0.275	1.01392e-22	3	Atp11c	AVC/OFTm	Two-sided Wilcoxon test	0.25	25
3.73105e-25	0.475875	0.785	0.31	8.76199e-21	3	Usp29	AVC/OFTm	Two-sided Wilcoxon test	0.25	25
1.06748e-77	0.47478	0.436	0.028	2.50687e-73	3	Boc	AVC/OFTm	Two-sided Wilcoxon test	0.25	25
2.60152e-24	0.474565	0.779	0.318	6.1094e-20	3	Sec24d	AVC/OFTm	Two-sided Wilcoxon test	0.25	25
9.93423e-25	0.474459	0.268	0.045	2.33295e-20	3	Trpm3	AVC/OFTm	Two-sided Wilcoxon test	0.25	25
3.22088e-17	0.474036	0.872	0.455	7.56392e-13	3	Erc1	AVC/OFTm	Two-sided Wilcoxon test	0.25	25
4.74972e-19	0.473986	0.879	0.468	1.11543e-14	3	Rbm6	AVC/OFTm	Two-sided Wilcoxon test	0.25	25
2.75055e-20	0.473036	0.96	0.61	6.4594e-16	3	Smarcc1	AVC/OFTm	Two-sided Wilcoxon test	0.25	25
3.88412e-22	0.473013	0.859	0.382	9.12147e-18	3	Pias2	AVC/OFTm	Two-sided Wilcoxon test	0.25	25
3.8596e-24	0.472717	0.872	0.382	9.06388e-20	3	Tnrc6c	AVC/OFTm	Two-sided Wilcoxon test	0.25	25
2.47525e-16	0.4724	0.819	0.395	5.81288e-12	3	Diaph2	AVC/OFTm	Two-sided Wilcoxon test	0.25	25
1.61209e-21	0.472296	0.839	0.376	3.78584e-17	3	Hmbox1	AVC/OFTm	Two-sided Wilcoxon test	0.25	25
2.1108e-50	0.472049	0.309	0.023	4.95699e-46	3	2610035D17Rik	AVC/OFTm	Two-sided Wilcoxon test	0.25	25
1.67689e-20	0.47184	0.852	0.396	3.93802e-16	3	Cdc42bpa	AVC/OFTm	Two-sided Wilcoxon test	0.25	25
1.53181e-28	0.471741	0.711	0.241	3.59729e-24	3	Chn1	AVC/OFTm	Two-sided Wilcoxon test	0.25	25
5.67241e-58	0.471313	0.497	0.064	1.33211e-53	3	Itgb8	AVC/OFTm	Two-sided Wilcoxon test	0.25	25
1.159e-54	0.471138	0.503	0.07	2.7218e-50	3	Plpp3	AVC/OFTm	Two-sided Wilcoxon test	0.25	25
4.50532e-27	0.470795	0.785	0.302	1.05803e-22	3	Cmip	AVC/OFTm	Two-sided Wilcoxon test	0.25	25
1.24702e-30	0.470744	0.812	0.299	2.92851e-26	3	Rnf4	AVC/OFTm	Two-sided Wilcoxon test	0.25	25
2.58806e-32	0.469075	0.705	0.218	6.07779e-28	3	Ctdspl	AVC/OFTm	Two-sided Wilcoxon test	0.25	25
2.02271e-18	0.469035	0.866	0.449	4.75013e-14	3	Rptor	AVC/OFTm	Two-sided Wilcoxon test	0.25	25
1.05959e-39	0.467779	0.658	0.168	2.48833e-35	3	Fgfr1	AVC/OFTm	Two-sided Wilcoxon test	0.25	25
2.41878e-19	0.4676	0.758	0.346	5.68027e-15	3	Mid1	AVC/OFTm	Two-sided Wilcoxon test	0.25	25
1.47428e-21	0.466273	0.852	0.373	3.46219e-17	3	Hsd17b12	AVC/OFTm	Two-sided Wilcoxon test	0.25	25
4.34664e-17	0.466243	0.805	0.398	1.02076e-12	3	Rras2	AVC/OFTm	Two-sided Wilcoxon test	0.25	25
6.5645e-37	0.466193	0.772	0.236	1.54161e-32	3	Znrf1	AVC/OFTm	Two-sided Wilcoxon test	0.25	25
1.82071e-31	0.465893	0.725	0.232	4.27576e-27	3	Cntln	AVC/OFTm	Two-sided Wilcoxon test	0.25	25
9.37148e-36	0.465782	0.772	0.24	2.2008e-31	3	Cacul1	AVC/OFTm	Two-sided Wilcoxon test	0.25	25
6.6732e-17	0.46554	0.906	0.477	1.56713e-12	3	Rapgef6	AVC/OFTm	Two-sided Wilcoxon test	0.25	25
7.2253e-18	0.465347	0.879	0.529	1.69679e-13	3	Sumo1	AVC/OFTm	Two-sided Wilcoxon test	0.25	25
2.01643e-24	0.465233	0.859	0.368	4.73538e-20	3	Exoc5	AVC/OFTm	Two-sided Wilcoxon test	0.25	25
3.65833e-23	0.464718	0.812	0.343	8.59123e-19	3	Wwtr1	AVC/OFTm	Two-sided Wilcoxon test	0.25	25
1.15553e-13	0.464446	0.987	0.665	2.71364e-09	3	Akap13	AVC/OFTm	Two-sided Wilcoxon test	0.25	25
1.29836e-36	0.464409	0.403	0.068	3.04906e-32	3	Dock10	AVC/OFTm	Two-sided Wilcoxon test	0.25	25
5.93058e-18	0.464116	0.933	0.527	1.39274e-13	3	Rsrc2	AVC/OFTm	Two-sided Wilcoxon test	0.25	25
2.46947e-38	0.464067	0.47	0.09	5.7993e-34	3	Nckap5	AVC/OFTm	Two-sided Wilcoxon test	0.25	25
3.15955e-25	0.464044	0.872	0.373	7.41988e-21	3	Fchsd2	AVC/OFTm	Two-sided Wilcoxon test	0.25	25
4.6585e-47	0.463999	0.416	0.053	1.094e-42	3	Calcrl	AVC/OFTm	Two-sided Wilcoxon test	0.25	25
1.88817e-14	0.463845	0.953	0.744	4.43417e-10	3	Stmn1	AVC/OFTm	Two-sided Wilcoxon test	0.25	25
9.83418e-22	0.463834	0.799	0.357	2.30946e-17	3	Ppp2r5e	AVC/OFTm	Two-sided Wilcoxon test	0.25	25
8.95401e-25	0.463659	0.779	0.316	2.10276e-20	3	Ano6	AVC/OFTm	Two-sided Wilcoxon test	0.25	25
2.39484e-22	0.462937	0.805	0.349	5.62405e-18	3	Ppp4r3b	AVC/OFTm	Two-sided Wilcoxon test	0.25	25
7.73293e-19	0.462338	0.758	0.342	1.816e-14	3	Lrba	AVC/OFTm	Two-sided Wilcoxon test	0.25	25
4.05433e-30	0.461904	0.725	0.234	9.5212e-26	3	Hdac8	AVC/OFTm	Two-sided Wilcoxon test	0.25	25
1.07184e-29	0.461231	0.711	0.248	2.51711e-25	3	Smo	AVC/OFTm	Two-sided Wilcoxon test	0.25	25
3.81613e-23	0.46069	0.846	0.37	8.96181e-19	3	Clasp2	AVC/OFTm	Two-sided Wilcoxon test	0.25	25
2.10289e-25	0.460663	0.289	0.051	4.93842e-21	3	Eya1	AVC/OFTm	Two-sided Wilcoxon test	0.25	25
1.69825e-20	0.460255	0.846	0.395	3.98817e-16	3	Arhgap10	AVC/OFTm	Two-sided Wilcoxon test	0.25	25
4.14006e-22	0.459998	0.631	0.235	9.72251e-18	3	Fos	AVC/OFTm	Two-sided Wilcoxon test	0.25	25
1.33507e-52	0.459959	0.463	0.061	3.13529e-48	3	Zfp503	AVC/OFTm	Two-sided Wilcoxon test	0.25	25
5.46742e-22	0.45944	0.43	0.122	1.28397e-17	3	Clstn2	AVC/OFTm	Two-sided Wilcoxon test	0.25	25
3.82341e-15	0.459295	0.926	0.599	8.9789e-11	3	Prpf40a	AVC/OFTm	Two-sided Wilcoxon test	0.25	25
2.4263e-22	0.459081	0.839	0.399	5.69793e-18	3	Ski	AVC/OFTm	Two-sided Wilcoxon test	0.25	25
4.67522e-22	0.458397	0.846	0.386	1.09793e-17	3	Epc2	AVC/OFTm	Two-sided Wilcoxon test	0.25	25
1.75332e-33	0.458304	0.705	0.216	4.1175e-29	3	Atxn7	AVC/OFTm	Two-sided Wilcoxon test	0.25	25
4.28352e-18	0.457758	0.96	0.551	1.00594e-13	3	Ascc3	AVC/OFTm	Two-sided Wilcoxon test	0.25	25
2.05592e-17	0.457613	0.94	0.518	4.82813e-13	3	Mkln1	AVC/OFTm	Two-sided Wilcoxon test	0.25	25
5.09356e-27	0.457497	0.792	0.302	1.19617e-22	3	Asap2	AVC/OFTm	Two-sided Wilcoxon test	0.25	25
7.45006e-42	0.456904	0.537	0.106	1.74957e-37	3	Ophn1	AVC/OFTm	Two-sided Wilcoxon test	0.25	25
1.54271e-07	0.456518	0.913	0.709	0.00362289	3	Sparc	AVC/OFTm	Two-sided Wilcoxon test	0.25	25
4.74504e-27	0.456277	0.47	0.116	1.11433e-22	3	Trabd2b	AVC/OFTm	Two-sided Wilcoxon test	0.25	25
4.46247e-17	0.45559	0.993	0.928	1.04797e-12	3	Grb10	AVC/OFTm	Two-sided Wilcoxon test	0.25	25
2.14265e-53	0.455483	0.671	0.13	5.03181e-49	3	Dbn1	AVC/OFTm	Two-sided Wilcoxon test	0.25	25
2.82659e-32	0.454847	0.725	0.243	6.63796e-28	3	H2afy2	AVC/OFTm	Two-sided Wilcoxon test	0.25	25
6.97134e-28	0.454824	0.752	0.263	1.63715e-23	3	Ccn1	AVC/OFTm	Two-sided Wilcoxon test	0.25	25
3.68812e-18	0.45477	0.839	0.406	8.66119e-14	3	Lrp6	AVC/OFTm	Two-sided Wilcoxon test	0.25	25
4.48311e-14	0.453897	0.946	0.618	1.05281e-09	3	App	AVC/OFTm	Two-sided Wilcoxon test	0.25	25
3.71712e-19	0.453447	0.557	0.198	8.72929e-15	3	Adamtsl1	AVC/OFTm	Two-sided Wilcoxon test	0.25	25
1.29662e-16	0.453432	0.886	0.529	3.04498e-12	3	Bptf	AVC/OFTm	Two-sided Wilcoxon test	0.25	25
1.00646e-23	0.45331	0.718	0.273	2.36358e-19	3	Grk5	AVC/OFTm	Two-sided Wilcoxon test	0.25	25
1.1806e-12	0.453288	0.919	0.581	2.77251e-08	3	Ltbp1	AVC/OFTm	Two-sided Wilcoxon test	0.25	25
1.0738e-35	0.452477	0.718	0.203	2.5217e-31	3	Nol10	AVC/OFTm	Two-sided Wilcoxon test	0.25	25
2.96888e-24	0.452453	0.671	0.243	6.97211e-20	3	Klf6	AVC/OFTm	Two-sided Wilcoxon test	0.25	25
2.14016e-34	0.452367	0.718	0.218	5.02595e-30	3	L3mbtl3	AVC/OFTm	Two-sided Wilcoxon test	0.25	25
9.16608e-27	0.450227	0.812	0.326	2.15256e-22	3	Trim24	AVC/OFTm	Two-sided Wilcoxon test	0.25	25
7.50331e-26	0.448845	0.819	0.312	1.76208e-21	3	Ccnt2	AVC/OFTm	Two-sided Wilcoxon test	0.25	25
1.79744e-11	0.447966	0.96	0.796	4.22111e-07	3	Gnas	AVC/OFTm	Two-sided Wilcoxon test	0.25	25
5.35987e-10	0.447927	0.94	0.834	1.25871e-05	3	Tmsb10	AVC/OFTm	Two-sided Wilcoxon test	0.25	25
3.90564e-15	0.447751	0.96	0.568	9.17201e-11	3	Bmpr1a	AVC/OFTm	Two-sided Wilcoxon test	0.25	25
1.7829e-15	0.447686	0.946	0.562	4.18696e-11	3	Bbx	AVC/OFTm	Two-sided Wilcoxon test	0.25	25
1.18451e-24	0.446481	0.832	0.341	2.78169e-20	3	Cdc42se2	AVC/OFTm	Two-sided Wilcoxon test	0.25	25
1.2835e-59	0.446421	0.443	0.046	3.01418e-55	3	Peli2	AVC/OFTm	Two-sided Wilcoxon test	0.25	25
2.86709e-23	0.446331	0.792	0.327	6.73309e-19	3	E2f3	AVC/OFTm	Two-sided Wilcoxon test	0.25	25
3.15309e-17	0.446311	0.691	0.302	7.40471e-13	3	Immp2l	AVC/OFTm	Two-sided Wilcoxon test	0.25	25
8.70117e-12	0.445339	0.966	0.736	2.04338e-07	3	Fus	AVC/OFTm	Two-sided Wilcoxon test	0.25	25
4.60108e-25	0.44459	0.819	0.336	1.08052e-20	3	Ppfibp1	AVC/OFTm	Two-sided Wilcoxon test	0.25	25
1.90475e-26	0.44442	0.785	0.304	4.47313e-22	3	Adss	AVC/OFTm	Two-sided Wilcoxon test	0.25	25
1.04809e-48	0.444419	0.638	0.131	2.46134e-44	3	Gm49692	AVC/OFTm	Two-sided Wilcoxon test	0.25	25
5.28396e-18	0.444095	0.926	0.473	1.24088e-13	3	Zfp407	AVC/OFTm	Two-sided Wilcoxon test	0.25	25
1.44139e-74	0.443905	0.477	0.04	3.38497e-70	3	Nox4	AVC/OFTm	Two-sided Wilcoxon test	0.25	25
1.81441e-29	0.443771	0.758	0.263	4.26096e-25	3	Usp6nl	AVC/OFTm	Two-sided Wilcoxon test	0.25	25
3.14876e-17	0.443625	0.94	0.504	7.39455e-13	3	Tanc1	AVC/OFTm	Two-sided Wilcoxon test	0.25	25
1.56242e-13	0.443017	0.98	0.711	3.66919e-09	3	Rab2a	AVC/OFTm	Two-sided Wilcoxon test	0.25	25
2.23781e-16	0.442676	0.893	0.493	5.25527e-12	3	Ube2e3	AVC/OFTm	Two-sided Wilcoxon test	0.25	25
3.1521e-31	0.442565	0.752	0.247	7.40239e-27	3	Scai	AVC/OFTm	Two-sided Wilcoxon test	0.25	25
2.31064e-17	0.441493	0.919	0.491	5.42631e-13	3	R3hdm1	AVC/OFTm	Two-sided Wilcoxon test	0.25	25
5.97391e-14	0.440141	0.933	0.618	1.40291e-09	3	Srsf11	AVC/OFTm	Two-sided Wilcoxon test	0.25	25
8.91336e-26	0.439433	0.617	0.201	2.09321e-21	3	Kif15	AVC/OFTm	Two-sided Wilcoxon test	0.25	25
7.1073e-14	0.439165	0.966	0.626	1.66908e-09	3	Tbl1x	AVC/OFTm	Two-sided Wilcoxon test	0.25	25
6.96715e-47	0.43912	0.651	0.138	1.63617e-42	3	Mfap2	AVC/OFTm	Two-sided Wilcoxon test	0.25	25
4.01108e-13	0.439061	0.919	0.66	9.41963e-09	3	Pcbp2	AVC/OFTm	Two-sided Wilcoxon test	0.25	25
1.69944e-37	0.438936	0.416	0.071	3.99097e-33	3	Nedd9	AVC/OFTm	Two-sided Wilcoxon test	0.25	25
2.0702e-16	0.438832	0.919	0.547	4.86165e-12	3	Acin1	AVC/OFTm	Two-sided Wilcoxon test	0.25	25
2.00242e-43	0.437885	0.255	0.018	4.70247e-39	3	Tbx3os1	AVC/OFTm	Two-sided Wilcoxon test	0.25	25
2.94136e-61	0.4377	0.47	0.052	6.90748e-57	3	Mfap4	AVC/OFTm	Two-sided Wilcoxon test	0.25	25
4.97771e-56	0.437567	0.47	0.058	1.16896e-51	3	Wnt5b	AVC/OFTm	Two-sided Wilcoxon test	0.25	25
1.15698e-35	0.436549	0.718	0.213	2.71706e-31	3	Ric1	AVC/OFTm	Two-sided Wilcoxon test	0.25	25
2.48536e-17	0.434911	0.839	0.405	5.83663e-13	3	Spats2	AVC/OFTm	Two-sided Wilcoxon test	0.25	25
3.98526e-15	0.434586	0.886	0.487	9.35899e-11	3	Id2	AVC/OFTm	Two-sided Wilcoxon test	0.25	25
7.2325e-19	0.434459	0.651	0.264	1.69848e-14	3	Cenpp	AVC/OFTm	Two-sided Wilcoxon test	0.25	25
4.2858e-15	0.433923	0.966	0.574	1.00648e-10	3	Kcnq1ot1	AVC/OFTm	Two-sided Wilcoxon test	0.25	25
3.18689e-16	0.433589	0.919	0.523	7.48408e-12	3	Tnpo1	AVC/OFTm	Two-sided Wilcoxon test	0.25	25
7.52256e-21	0.433493	0.819	0.367	1.7666e-16	3	Cox16	AVC/OFTm	Two-sided Wilcoxon test	0.25	25
1.68458e-15	0.433069	0.933	0.516	3.95607e-11	3	Zeb1	AVC/OFTm	Two-sided Wilcoxon test	0.25	25
4.81883e-19	0.433061	0.557	0.204	1.13165e-14	3	Itpr2	AVC/OFTm	Two-sided Wilcoxon test	0.25	25
8.25526e-49	0.432978	0.544	0.095	1.93867e-44	3	Wipf1	AVC/OFTm	Two-sided Wilcoxon test	0.25	25
4.05693e-16	0.432631	0.859	0.449	9.5273e-12	3	Zfp608	AVC/OFTm	Two-sided Wilcoxon test	0.25	25
1.56274e-28	0.432359	0.785	0.289	3.66995e-24	3	Pdxdc1	AVC/OFTm	Two-sided Wilcoxon test	0.25	25
4.69546e-43	0.432015	0.53	0.1	1.10268e-38	3	Elk3	AVC/OFTm	Two-sided Wilcoxon test	0.25	25
2.35499e-28	0.431901	0.785	0.288	5.53047e-24	3	Mcmbp	AVC/OFTm	Two-sided Wilcoxon test	0.25	25
1.31318e-28	0.430885	0.738	0.251	3.08388e-24	3	Cep83	AVC/OFTm	Two-sided Wilcoxon test	0.25	25
2.48887e-13	0.430606	0.926	0.635	5.84486e-09	3	Ywhaz	AVC/OFTm	Two-sided Wilcoxon test	0.25	25
2.74258e-23	0.430043	0.718	0.269	6.44068e-19	3	Timp3	AVC/OFTm	Two-sided Wilcoxon test	0.25	25
9.6434e-38	0.429758	0.651	0.169	2.26466e-33	3	Ldlrad3	AVC/OFTm	Two-sided Wilcoxon test	0.25	25
1.85643e-15	0.429332	0.899	0.467	4.35965e-11	3	Zcchc7	AVC/OFTm	Two-sided Wilcoxon test	0.25	25
2.5737e-15	0.42912	0.893	0.479	6.04407e-11	3	Btbd9	AVC/OFTm	Two-sided Wilcoxon test	0.25	25
1.55145e-23	0.42911	0.315	0.067	3.64342e-19	3	a	AVC/OFTm	Two-sided Wilcoxon test	0.25	25
4.53656e-25	0.428341	0.725	0.277	1.06537e-20	3	Polr2a	AVC/OFTm	Two-sided Wilcoxon test	0.25	25
1.70497e-14	0.427916	0.886	0.482	4.00395e-10	3	Ythdf3	AVC/OFTm	Two-sided Wilcoxon test	0.25	25
6.50692e-35	0.427849	0.55	0.128	1.52809e-30	3	Ece1	AVC/OFTm	Two-sided Wilcoxon test	0.25	25
7.55854e-18	0.427435	0.872	0.444	1.77505e-13	3	Gatad2b	AVC/OFTm	Two-sided Wilcoxon test	0.25	25
7.29769e-27	0.427184	0.772	0.281	1.71379e-22	3	Ints7	AVC/OFTm	Two-sided Wilcoxon test	0.25	25
3.37544e-19	0.42699	0.839	0.404	7.92688e-15	3	Ogt	AVC/OFTm	Two-sided Wilcoxon test	0.25	25
1.24977e-23	0.426931	0.812	0.336	2.93495e-19	3	Rai1	AVC/OFTm	Two-sided Wilcoxon test	0.25	25
2.91937e-16	0.426691	0.946	0.545	6.85586e-12	3	Ythdc1	AVC/OFTm	Two-sided Wilcoxon test	0.25	25
8.90409e-22	0.426568	0.289	0.059	2.09104e-17	3	Hs6st3	AVC/OFTm	Two-sided Wilcoxon test	0.25	25
1.92639e-35	0.426179	0.584	0.145	4.52392e-31	3	Rin2	AVC/OFTm	Two-sided Wilcoxon test	0.25	25
2.92108e-26	0.425837	0.517	0.143	6.85987e-22	3	Cep128	AVC/OFTm	Two-sided Wilcoxon test	0.25	25
1.0462e-48	0.425775	0.289	0.02	2.45691e-44	3	Astn2	AVC/OFTm	Two-sided Wilcoxon test	0.25	25
3.61464e-26	0.425617	0.826	0.321	8.48861e-22	3	Nlk	AVC/OFTm	Two-sided Wilcoxon test	0.25	25
3.33187e-16	0.425316	0.846	0.418	7.82456e-12	3	Rap1gds1	AVC/OFTm	Two-sided Wilcoxon test	0.25	25
3.46662e-16	0.425165	0.919	0.496	8.14102e-12	3	Mapk1	AVC/OFTm	Two-sided Wilcoxon test	0.25	25
1.76459e-19	0.425006	0.805	0.348	4.14396e-15	3	Hs2st1	AVC/OFTm	Two-sided Wilcoxon test	0.25	25
7.39317e-08	0.424869	0.906	0.686	0.00173621	3	H19	AVC/OFTm	Two-sided Wilcoxon test	0.25	25
6.22999e-14	0.42466	0.886	0.479	1.46305e-09	3	Itpr1	AVC/OFTm	Two-sided Wilcoxon test	0.25	25
3.69537e-33	0.424396	0.718	0.221	8.67821e-29	3	Nrep	AVC/OFTm	Two-sided Wilcoxon test	0.25	25
1.52104e-14	0.424208	0.872	0.523	3.57201e-10	3	Bclaf1	AVC/OFTm	Two-sided Wilcoxon test	0.25	25
7.95632e-09	0.424093	0.993	0.949	0.000186846	3	Rps27a	AVC/OFTm	Two-sided Wilcoxon test	0.25	25
1.85592e-22	0.42407	0.799	0.33	4.35845e-18	3	Tmem131	AVC/OFTm	Two-sided Wilcoxon test	0.25	25
1.75145e-34	0.424002	0.664	0.19	4.11311e-30	3	Mex3c	AVC/OFTm	Two-sided Wilcoxon test	0.25	25
2.46286e-28	0.423724	0.745	0.264	5.78378e-24	3	Rnf169	AVC/OFTm	Two-sided Wilcoxon test	0.25	25
7.01554e-12	0.423524	0.987	0.711	1.64753e-07	3	Fbn2	AVC/OFTm	Two-sided Wilcoxon test	0.25	25
1.11332e-30	0.423393	0.711	0.225	2.61453e-26	3	Mrtfa	AVC/OFTm	Two-sided Wilcoxon test	0.25	25
3.74108e-13	0.422932	0.758	0.442	8.78555e-09	3	Sec61b	AVC/OFTm	Two-sided Wilcoxon test	0.25	25
2.64558e-65	0.422496	0.262	0.006	6.21287e-61	3	Brinp1	AVC/OFTm	Two-sided Wilcoxon test	0.25	25
7.07331e-36	0.422428	0.57	0.133	1.6611e-31	3	Gria3	AVC/OFTm	Two-sided Wilcoxon test	0.25	25
1.23385e-16	0.422333	0.846	0.451	2.89758e-12	3	Tra2a	AVC/OFTm	Two-sided Wilcoxon test	0.25	25
3.09188e-14	0.421761	0.933	0.562	7.26097e-10	3	Mycbp2	AVC/OFTm	Two-sided Wilcoxon test	0.25	25
1.16406e-20	0.421557	0.852	0.373	2.73369e-16	3	Atad2	AVC/OFTm	Two-sided Wilcoxon test	0.25	25
4.73684e-16	0.4207	0.718	0.333	1.1124e-11	3	Itm2a	AVC/OFTm	Two-sided Wilcoxon test	0.25	25
2.62627e-13	0.420357	0.966	0.683	6.16753e-09	3	Caprin1	AVC/OFTm	Two-sided Wilcoxon test	0.25	25
5.34252e-50	0.420167	0.322	0.026	1.25464e-45	3	Dach2	AVC/OFTm	Two-sided Wilcoxon test	0.25	25
2.27514e-15	0.420091	0.886	0.507	5.34294e-11	3	Btbd7	AVC/OFTm	Two-sided Wilcoxon test	0.25	25
9.64906e-17	0.42007	0.846	0.417	2.26599e-12	3	Aff2	AVC/OFTm	Two-sided Wilcoxon test	0.25	25
1.71924e-18	0.420047	0.913	0.444	4.03746e-14	3	Cstf3	AVC/OFTm	Two-sided Wilcoxon test	0.25	25
3.18622e-22	0.419189	0.893	0.415	7.48252e-18	3	Fam193a	AVC/OFTm	Two-sided Wilcoxon test	0.25	25
4.99235e-18	0.418931	0.812	0.37	1.1724e-13	3	Pou2f1	AVC/OFTm	Two-sided Wilcoxon test	0.25	25
6.32896e-20	0.418928	0.893	0.435	1.48629e-15	3	Setd2	AVC/OFTm	Two-sided Wilcoxon test	0.25	25
3.87052e-12	0.418906	0.919	0.58	9.08953e-08	3	Fras1	AVC/OFTm	Two-sided Wilcoxon test	0.25	25
1.04676e-22	0.418751	0.772	0.316	2.45822e-18	3	Ddah2	AVC/OFTm	Two-sided Wilcoxon test	0.25	25
1.16051e-33	0.417895	0.436	0.088	2.72535e-29	3	Garnl3	AVC/OFTm	Two-sided Wilcoxon test	0.25	25
4.62944e-24	0.417688	0.805	0.324	1.08718e-19	3	Spidr	AVC/OFTm	Two-sided Wilcoxon test	0.25	25
2.96566e-21	0.417278	0.812	0.377	6.96455e-17	3	Wsb1	AVC/OFTm	Two-sided Wilcoxon test	0.25	25
7.93331e-24	0.416757	0.725	0.275	1.86306e-19	3	Chka	AVC/OFTm	Two-sided Wilcoxon test	0.25	25
7.19788e-18	0.416595	0.886	0.427	1.69035e-13	3	Atp9b	AVC/OFTm	Two-sided Wilcoxon test	0.25	25
8.52831e-14	0.416299	0.872	0.538	2.00279e-09	3	Zmiz1	AVC/OFTm	Two-sided Wilcoxon test	0.25	25
2.22348e-20	0.416221	0.812	0.357	5.22162e-16	3	Prrc1	AVC/OFTm	Two-sided Wilcoxon test	0.25	25
6.64207e-17	0.415957	0.94	0.496	1.55982e-12	3	Cdk13	AVC/OFTm	Two-sided Wilcoxon test	0.25	25
7.18449e-17	0.415784	0.866	0.431	1.68721e-12	3	Ap3b1	AVC/OFTm	Two-sided Wilcoxon test	0.25	25
1.15558e-14	0.415294	0.859	0.469	2.71376e-10	3	Zfp827	AVC/OFTm	Two-sided Wilcoxon test	0.25	25
8.86999e-34	0.415251	0.49	0.109	2.08303e-29	3	Cnksr2	AVC/OFTm	Two-sided Wilcoxon test	0.25	25
3.18777e-12	0.415114	0.886	0.534	7.48616e-08	3	Jarid2	AVC/OFTm	Two-sided Wilcoxon test	0.25	25
5.10999e-48	0.41383	0.49	0.076	1.20003e-43	3	Spata6	AVC/OFTm	Two-sided Wilcoxon test	0.25	25
1.60609e-25	0.413585	0.295	0.053	3.77174e-21	3	Col9a1	AVC/OFTm	Two-sided Wilcoxon test	0.25	25
9.27888e-21	0.413282	0.846	0.381	2.17905e-16	3	Mapkap1	AVC/OFTm	Two-sided Wilcoxon test	0.25	25
3.04588e-27	0.412213	0.537	0.149	7.15295e-23	3	Wdpcp	AVC/OFTm	Two-sided Wilcoxon test	0.25	25
7.58124e-20	0.412045	0.879	0.421	1.78038e-15	3	E130308A19Rik	AVC/OFTm	Two-sided Wilcoxon test	0.25	25
1.94797e-17	0.411551	0.812	0.395	4.57462e-13	3	Rps6ka3	AVC/OFTm	Two-sided Wilcoxon test	0.25	25
1.9771e-40	0.411076	0.322	0.037	4.64302e-36	3	Tek	AVC/OFTm	Two-sided Wilcoxon test	0.25	25
6.12428e-24	0.411005	0.826	0.334	1.43823e-19	3	Ankib1	AVC/OFTm	Two-sided Wilcoxon test	0.25	25
3.45489e-17	0.410969	0.826	0.411	8.11347e-13	3	Smad2	AVC/OFTm	Two-sided Wilcoxon test	0.25	25
4.46954e-07	0.410519	0.98	0.968	0.0104963	3	Rpl41	AVC/OFTm	Two-sided Wilcoxon test	0.25	25
4.08175e-22	0.410426	0.752	0.301	9.58559e-18	3	Kansl1l	AVC/OFTm	Two-sided Wilcoxon test	0.25	25
7.52624e-15	0.410333	0.886	0.509	1.76746e-10	3	Ppp2r2a	AVC/OFTm	Two-sided Wilcoxon test	0.25	25
2.88148e-22	0.409561	0.725	0.28	6.76688e-18	3	Mms22l	AVC/OFTm	Two-sided Wilcoxon test	0.25	25
2.73346e-14	0.408956	0.839	0.419	6.41927e-10	3	Dach1	AVC/OFTm	Two-sided Wilcoxon test	0.25	25
5.78957e-21	0.408429	0.872	0.413	1.35962e-16	3	Ilf3	AVC/OFTm	Two-sided Wilcoxon test	0.25	25
5.50721e-24	0.408063	0.691	0.251	1.29331e-19	3	Cdk17	AVC/OFTm	Two-sided Wilcoxon test	0.25	25
4.0035e-27	0.408021	0.725	0.26	9.40181e-23	3	Dusp16	AVC/OFTm	Two-sided Wilcoxon test	0.25	25
8.13655e-16	0.405937	0.919	0.507	1.91079e-11	3	Rbm26	AVC/OFTm	Two-sided Wilcoxon test	0.25	25
4.12013e-28	0.40589	0.691	0.236	9.67571e-24	3	Maco1	AVC/OFTm	Two-sided Wilcoxon test	0.25	25
1.90256e-15	0.405476	0.886	0.489	4.46797e-11	3	Papola	AVC/OFTm	Two-sided Wilcoxon test	0.25	25
3.18891e-20	0.405371	0.638	0.247	7.48884e-16	3	Tagln2	AVC/OFTm	Two-sided Wilcoxon test	0.25	25
1.27345e-26	0.403993	0.711	0.247	2.99056e-22	3	Atf7	AVC/OFTm	Two-sided Wilcoxon test	0.25	25
4.09398e-17	0.40381	0.839	0.429	9.6143e-13	3	Tpm3	AVC/OFTm	Two-sided Wilcoxon test	0.25	25
4.19943e-15	0.403386	0.859	0.459	9.86195e-11	3	Ubn2	AVC/OFTm	Two-sided Wilcoxon test	0.25	25
3.80998e-25	0.403318	0.725	0.26	8.94736e-21	3	Pdss2	AVC/OFTm	Two-sided Wilcoxon test	0.25	25
6.34265e-23	0.403273	0.819	0.342	1.48951e-18	3	Ptprs	AVC/OFTm	Two-sided Wilcoxon test	0.25	25
2.1317e-25	0.403107	0.819	0.313	5.00609e-21	3	Hook3	AVC/OFTm	Two-sided Wilcoxon test	0.25	25
2.44985e-08	0.402966	0.993	0.967	0.000575322	3	Rps20	AVC/OFTm	Two-sided Wilcoxon test	0.25	25
1.28231e-16	0.402875	0.906	0.473	3.01137e-12	3	Cul3	AVC/OFTm	Two-sided Wilcoxon test	0.25	25
1.02932e-17	0.402821	0.879	0.414	2.41725e-13	3	Agfg1	AVC/OFTm	Two-sided Wilcoxon test	0.25	25
1.5374e-13	0.402724	0.913	0.535	3.61043e-09	3	Neo1	AVC/OFTm	Two-sided Wilcoxon test	0.25	25
2.44624e-41	0.402366	0.289	0.027	5.74476e-37	3	Rerg	AVC/OFTm	Two-sided Wilcoxon test	0.25	25
2.31095e-19	0.401962	0.859	0.395	5.42703e-15	3	Itch	AVC/OFTm	Two-sided Wilcoxon test	0.25	25
2.18732e-15	0.401838	0.872	0.465	5.1367e-11	3	Epb41	AVC/OFTm	Two-sided Wilcoxon test	0.25	25
3.09132e-54	0.401741	0.584	0.095	7.25966e-50	3	Mrc2	AVC/OFTm	Two-sided Wilcoxon test	0.25	25
1.81468e-13	0.401128	0.987	0.764	4.26159e-09	3	Atrx	AVC/OFTm	Two-sided Wilcoxon test	0.25	25
1.39568e-12	0.400209	0.973	0.704	3.27761e-08	3	Igf1r	AVC/OFTm	Two-sided Wilcoxon test	0.25	25
1.4808e-31	0.399586	0.523	0.128	3.47751e-27	3	Gas2	AVC/OFTm	Two-sided Wilcoxon test	0.25	25
2.33718e-13	0.399566	0.933	0.574	5.48864e-09	3	Mllt10	AVC/OFTm	Two-sided Wilcoxon test	0.25	25
1.97344e-22	0.3995	0.718	0.272	4.63442e-18	3	Pkia	AVC/OFTm	Two-sided Wilcoxon test	0.25	25
6.28385e-23	0.399485	0.624	0.216	1.4757e-18	3	Ptpn12	AVC/OFTm	Two-sided Wilcoxon test	0.25	25
1.37582e-27	0.399318	0.497	0.133	3.23099e-23	3	Foxo1	AVC/OFTm	Two-sided Wilcoxon test	0.25	25
6.09977e-18	0.397906	0.409	0.128	1.43247e-13	3	Hapln1	AVC/OFTm	Two-sided Wilcoxon test	0.25	25
2.7945e-14	0.397651	0.617	0.277	6.5626e-10	3	Uty	AVC/OFTm	Two-sided Wilcoxon test	0.25	25
1.05903e-12	0.397588	0.946	0.591	2.48702e-08	3	Snrnp70	AVC/OFTm	Two-sided Wilcoxon test	0.25	25
4.1158e-31	0.397548	0.611	0.173	9.66555e-27	3	Specc1	AVC/OFTm	Two-sided Wilcoxon test	0.25	25
1.26637e-30	0.397396	0.557	0.153	2.97395e-26	3	Cdc14a	AVC/OFTm	Two-sided Wilcoxon test	0.25	25
4.26862e-34	0.397364	0.611	0.163	1.00244e-29	3	Efnb2	AVC/OFTm	Two-sided Wilcoxon test	0.25	25
5.40962e-26	0.396757	0.664	0.228	1.27039e-21	3	Pkd2	AVC/OFTm	Two-sided Wilcoxon test	0.25	25
3.54794e-14	0.396558	0.866	0.457	8.33198e-10	3	Btaf1	AVC/OFTm	Two-sided Wilcoxon test	0.25	25
3.10615e-63	0.395854	0.463	0.046	7.29448e-59	3	Ephb2	AVC/OFTm	Two-sided Wilcoxon test	0.25	25
3.22085e-14	0.395518	0.852	0.46	7.56384e-10	3	Cdk12	AVC/OFTm	Two-sided Wilcoxon test	0.25	25
4.48355e-26	0.395462	0.705	0.246	1.05292e-21	3	Khdc4	AVC/OFTm	Two-sided Wilcoxon test	0.25	25
2.57162e-26	0.395241	0.772	0.296	6.03919e-22	3	Gtf2ird1	AVC/OFTm	Two-sided Wilcoxon test	0.25	25
1.48678e-27	0.394553	0.725	0.251	3.49155e-23	3	Rbbp8	AVC/OFTm	Two-sided Wilcoxon test	0.25	25
1.22238e-15	0.394041	0.913	0.48	2.87065e-11	3	Cdkal1	AVC/OFTm	Two-sided Wilcoxon test	0.25	25
1.49249e-19	0.393521	0.879	0.398	3.50497e-15	3	Numb	AVC/OFTm	Two-sided Wilcoxon test	0.25	25
3.8225e-22	0.393303	0.846	0.362	8.97677e-18	3	Zfyve9	AVC/OFTm	Two-sided Wilcoxon test	0.25	25
4.58169e-19	0.393067	0.805	0.359	1.07596e-14	3	Herc4	AVC/OFTm	Two-sided Wilcoxon test	0.25	25
5.27907e-21	0.392934	0.792	0.329	1.23974e-16	3	Golim4	AVC/OFTm	Two-sided Wilcoxon test	0.25	25
4.97171e-29	0.392816	0.691	0.221	1.16756e-24	3	Fam117b	AVC/OFTm	Two-sided Wilcoxon test	0.25	25
1.56503e-39	0.392745	0.631	0.147	3.67532e-35	3	Dab2	AVC/OFTm	Two-sided Wilcoxon test	0.25	25
2.85591e-17	0.392255	0.685	0.286	6.70683e-13	3	B3galt1	AVC/OFTm	Two-sided Wilcoxon test	0.25	25
5.71713e-22	0.392104	0.826	0.336	1.34261e-17	3	Zranb1	AVC/OFTm	Two-sided Wilcoxon test	0.25	25
2.03546e-41	0.392037	0.43	0.067	4.78006e-37	3	Zdhhc15	AVC/OFTm	Two-sided Wilcoxon test	0.25	25
9.62712e-21	0.391768	0.738	0.302	2.26083e-16	3	Dgkh	AVC/OFTm	Two-sided Wilcoxon test	0.25	25
3.09305e-27	0.391619	0.389	0.086	7.26371e-23	3	Pknox2	AVC/OFTm	Two-sided Wilcoxon test	0.25	25
4.33545e-26	0.391401	0.752	0.274	1.01814e-21	3	Yes1	AVC/OFTm	Two-sided Wilcoxon test	0.25	25
2.10669e-09	0.390038	0.859	0.64	4.94734e-05	3	Snrpg	AVC/OFTm	Two-sided Wilcoxon test	0.25	25
4.1054e-32	0.390035	0.691	0.212	9.64112e-28	3	Tmod3	AVC/OFTm	Two-sided Wilcoxon test	0.25	25
2.60357e-75	0.38952	0.362	0.016	6.11422e-71	3	Hoxb3	AVC/OFTm	Two-sided Wilcoxon test	0.25	25
1.01553e-14	0.389493	0.852	0.445	2.38488e-10	3	Mtmr3	AVC/OFTm	Two-sided Wilcoxon test	0.25	25
1.07319e-20	0.389422	0.872	0.41	2.52027e-16	3	Ctcf	AVC/OFTm	Two-sided Wilcoxon test	0.25	25
2.70731e-23	0.389361	0.732	0.284	6.35784e-19	3	Abi1	AVC/OFTm	Two-sided Wilcoxon test	0.25	25
3.81456e-12	0.389319	0.906	0.556	8.95812e-08	3	Gdi2	AVC/OFTm	Two-sided Wilcoxon test	0.25	25
4.56524e-42	0.389001	0.289	0.026	1.0721e-37	3	Rhoj	AVC/OFTm	Two-sided Wilcoxon test	0.25	25
1.69106e-51	0.38879	0.584	0.102	3.97128e-47	3	Carmil1	AVC/OFTm	Two-sided Wilcoxon test	0.25	25
1.65411e-16	0.388299	0.893	0.441	3.88452e-12	3	Xrn1	AVC/OFTm	Two-sided Wilcoxon test	0.25	25
6.04543e-43	0.388276	0.477	0.081	1.41971e-38	3	Nrp2	AVC/OFTm	Two-sided Wilcoxon test	0.25	25
6.33434e-14	0.388051	0.872	0.484	1.48756e-09	3	Taf15	AVC/OFTm	Two-sided Wilcoxon test	0.25	25
7.02032e-18	0.387802	0.839	0.398	1.64865e-13	3	Ube3c	AVC/OFTm	Two-sided Wilcoxon test	0.25	25
3.53721e-29	0.38767	0.671	0.214	8.30679e-25	3	Cep120	AVC/OFTm	Two-sided Wilcoxon test	0.25	25
1.19131e-26	0.387376	0.638	0.211	2.79768e-22	3	Map2k6	AVC/OFTm	Two-sided Wilcoxon test	0.25	25
5.26305e-33	0.386898	0.577	0.15	1.23598e-28	3	Smarca2	AVC/OFTm	Two-sided Wilcoxon test	0.25	25
1.26799e-45	0.38683	0.376	0.045	2.97776e-41	3	Egfr	AVC/OFTm	Two-sided Wilcoxon test	0.25	25
1.29541e-75	0.386216	0.369	0.017	3.04214e-71	3	Sgip1	AVC/OFTm	Two-sided Wilcoxon test	0.25	25
8.54352e-21	0.386127	0.826	0.359	2.00636e-16	3	Ireb2	AVC/OFTm	Two-sided Wilcoxon test	0.25	25
7.161e-21	0.385978	0.886	0.395	1.68169e-16	3	Nfyc	AVC/OFTm	Two-sided Wilcoxon test	0.25	25
5.94478e-20	0.385692	0.846	0.381	1.39607e-15	3	Ipo11	AVC/OFTm	Two-sided Wilcoxon test	0.25	25
7.95188e-10	0.385479	0.926	0.733	1.86742e-05	3	Hmgn1	AVC/OFTm	Two-sided Wilcoxon test	0.25	25
6.2241e-17	0.385163	0.792	0.401	1.46167e-12	3	Cbx1	AVC/OFTm	Two-sided Wilcoxon test	0.25	25
6.90485e-28	0.385047	0.483	0.123	1.62154e-23	3	Gm14582	AVC/OFTm	Two-sided Wilcoxon test	0.25	25
3.54068e-11	0.384274	0.94	0.619	8.31493e-07	3	Ube2k	AVC/OFTm	Two-sided Wilcoxon test	0.25	25
9.97917e-19	0.384171	0.779	0.342	2.34351e-14	3	Prkd3	AVC/OFTm	Two-sided Wilcoxon test	0.25	25
4.93992e-16	0.384083	0.886	0.455	1.16009e-11	3	Tpp2	AVC/OFTm	Two-sided Wilcoxon test	0.25	25
5.80011e-16	0.383414	0.926	0.499	1.3621e-11	3	Ppp6r3	AVC/OFTm	Two-sided Wilcoxon test	0.25	25
3.00434e-29	0.383231	0.497	0.125	7.05538e-25	3	Nxpe4	AVC/OFTm	Two-sided Wilcoxon test	0.25	25
3.93041e-25	0.383003	0.745	0.28	9.23017e-21	3	Trp53	AVC/OFTm	Two-sided Wilcoxon test	0.25	25
8.15219e-47	0.382815	0.577	0.112	1.91446e-42	3	Pi4k2b	AVC/OFTm	Two-sided Wilcoxon test	0.25	25
7.93528e-13	0.382421	0.919	0.52	1.86352e-08	3	Faf1	AVC/OFTm	Two-sided Wilcoxon test	0.25	25
9.30079e-31	0.382297	0.591	0.165	2.1842e-26	3	Ints6l	AVC/OFTm	Two-sided Wilcoxon test	0.25	25
1.00064e-15	0.38226	0.826	0.419	2.34991e-11	3	Rfx7	AVC/OFTm	Two-sided Wilcoxon test	0.25	25
2.20063e-19	0.382121	0.799	0.357	5.16795e-15	3	Mtf2	AVC/OFTm	Two-sided Wilcoxon test	0.25	25
5.76293e-15	0.381865	0.866	0.447	1.35337e-10	3	Abi2	AVC/OFTm	Two-sided Wilcoxon test	0.25	25
6.77058e-14	0.381833	0.799	0.402	1.59e-09	3	Stox2	AVC/OFTm	Two-sided Wilcoxon test	0.25	25
6.49151e-23	0.381265	0.745	0.296	1.52447e-18	3	Sfswap	AVC/OFTm	Two-sided Wilcoxon test	0.25	25
4.02254e-18	0.380946	0.846	0.403	9.44653e-14	3	Nup98	AVC/OFTm	Two-sided Wilcoxon test	0.25	25
1.98214e-16	0.380764	0.872	0.429	4.65486e-12	3	St7	AVC/OFTm	Two-sided Wilcoxon test	0.25	25
4.5673e-21	0.380756	0.792	0.322	1.07258e-16	3	Map2k5	AVC/OFTm	Two-sided Wilcoxon test	0.25	25
9.32748e-22	0.380725	0.772	0.329	2.19047e-17	3	Rbpj	AVC/OFTm	Two-sided Wilcoxon test	0.25	25
1.41741e-13	0.380691	0.866	0.514	3.32865e-09	3	Srsf10	AVC/OFTm	Two-sided Wilcoxon test	0.25	25
5.94867e-13	0.380639	0.953	0.611	1.39698e-08	3	Senp6	AVC/OFTm	Two-sided Wilcoxon test	0.25	25
6.16323e-14	0.380586	0.946	0.589	1.44737e-09	3	Arid1a	AVC/OFTm	Two-sided Wilcoxon test	0.25	25
3.73017e-12	0.380394	0.906	0.571	8.75994e-08	3	Syne2	AVC/OFTm	Two-sided Wilcoxon test	0.25	25
1.70759e-28	0.380288	0.523	0.136	4.0101e-24	3	Adam22	AVC/OFTm	Two-sided Wilcoxon test	0.25	25
1.16076e-98	0.380003	0.43	0.014	2.72592e-94	3	Lrig3	AVC/OFTm	Two-sided Wilcoxon test	0.25	25
6.03752e-16	0.379844	0.819	0.428	1.41785e-11	3	Mier1	AVC/OFTm	Two-sided Wilcoxon test	0.25	25
7.60556e-13	0.379779	0.879	0.488	1.78609e-08	3	Dip2b	AVC/OFTm	Two-sided Wilcoxon test	0.25	25
5.85011e-25	0.379269	0.738	0.269	1.37384e-20	3	Sgce	AVC/OFTm	Two-sided Wilcoxon test	0.25	25
5.7465e-15	0.379125	0.826	0.411	1.34951e-10	3	Cdc73	AVC/OFTm	Two-sided Wilcoxon test	0.25	25
1.38672e-18	0.379105	0.879	0.418	3.25658e-14	3	Tlk2	AVC/OFTm	Two-sided Wilcoxon test	0.25	25
7.46315e-25	0.3785	0.691	0.245	1.75265e-20	3	Itgav	AVC/OFTm	Two-sided Wilcoxon test	0.25	25
1.84084e-24	0.37847	0.799	0.307	4.32303e-20	3	Ahcyl1	AVC/OFTm	Two-sided Wilcoxon test	0.25	25
4.58648e-17	0.378437	0.799	0.401	1.07709e-12	3	Ilf2	AVC/OFTm	Two-sided Wilcoxon test	0.25	25
6.16124e-21	0.378235	0.765	0.31	1.44691e-16	3	Fam133b	AVC/OFTm	Two-sided Wilcoxon test	0.25	25
3.00603e-21	0.377736	0.779	0.318	7.05935e-17	3	Myo1e	AVC/OFTm	Two-sided Wilcoxon test	0.25	25
1.4837e-60	0.377661	0.282	0.011	3.48433e-56	3	Pappa	AVC/OFTm	Two-sided Wilcoxon test	0.25	25
3.74804e-30	0.377455	0.53	0.135	8.8019e-26	3	B830012L14Rik	AVC/OFTm	Two-sided Wilcoxon test	0.25	25
1.16041e-13	0.376951	0.899	0.539	2.72511e-09	3	Hnrnpdl	AVC/OFTm	Two-sided Wilcoxon test	0.25	25
2.40828e-24	0.376945	0.765	0.283	5.65561e-20	3	Iqgap1	AVC/OFTm	Two-sided Wilcoxon test	0.25	25
2.62532e-29	0.376912	0.53	0.138	6.1653e-25	3	Arhgap24	AVC/OFTm	Two-sided Wilcoxon test	0.25	25
7.45796e-32	0.376623	0.732	0.229	1.75143e-27	3	Avl9	AVC/OFTm	Two-sided Wilcoxon test	0.25	25
5.56414e-32	0.376464	0.51	0.123	1.30668e-27	3	Ptprj	AVC/OFTm	Two-sided Wilcoxon test	0.25	25
2.85247e-40	0.376293	0.503	0.097	6.69873e-36	3	Nr6a1os	AVC/OFTm	Two-sided Wilcoxon test	0.25	25
6.02015e-13	0.375882	0.919	0.553	1.41377e-08	3	Wdr33	AVC/OFTm	Two-sided Wilcoxon test	0.25	25
1.85447e-25	0.375743	0.785	0.289	4.35504e-21	3	Pik3ca	AVC/OFTm	Two-sided Wilcoxon test	0.25	25
2.7303e-21	0.375348	0.779	0.329	6.41183e-17	3	Srp72	AVC/OFTm	Two-sided Wilcoxon test	0.25	25
4.65322e-10	0.374483	0.872	0.566	1.09276e-05	3	Wwc2	AVC/OFTm	Two-sided Wilcoxon test	0.25	25
5.51949e-08	0.374259	0.993	0.944	0.0012962	3	Rps11	AVC/OFTm	Two-sided Wilcoxon test	0.25	25
[truncated: 7,002 more rows]

## Sheet: Fig5h
Supplementary Data 3. Marker expression in different cardiac cell populations from control and Rnf20iEC-KO embryos.
p_val	avg_log2FC	pct.1	pct.2	p_val_adj	cluster	gene	CELL_TYPE	Test_used	fc.threshold (log2)	min.pct (%)
2.30671e-93	1.55698	0.946	0.525	5.41707e-89	0	Col23a1	EndoC	Two-sided Wilcoxon test	0.25	25
1.63822e-55	1.53878	0.544	0.163	3.8472e-51	0	Hs3st4	EndoC	Two-sided Wilcoxon test	0.25	25
2.83656e-108	1.4733	0.946	0.544	6.66138e-104	0	Tgfbr3	EndoC	Two-sided Wilcoxon test	0.25	25
1.79589e-96	1.40812	0.942	0.5	4.21748e-92	0	Adgrg6	EndoC	Two-sided Wilcoxon test	0.25	25
4.06951e-80	1.38754	0.984	0.69	9.55684e-76	0	Ebf1	EndoC	Two-sided Wilcoxon test	0.25	25
3.69519e-74	1.3589	0.921	0.568	8.67779e-70	0	Mcc	EndoC	Two-sided Wilcoxon test	0.25	25
2.34058e-73	1.34273	0.977	0.882	5.49663e-69	0	Cdkn1c	EndoC	Two-sided Wilcoxon test	0.25	25
4.28767e-92	1.31484	0.879	0.387	1.00692e-87	0	Slc22a23	EndoC	Two-sided Wilcoxon test	0.25	25
7.62595e-66	1.25369	0.888	0.458	1.79088e-61	0	Pde7b	EndoC	Two-sided Wilcoxon test	0.25	25
1.63728e-61	1.19006	0.981	0.658	3.84499e-57	0	Nrxn3	EndoC	Two-sided Wilcoxon test	0.25	25
1.91366e-56	1.18745	0.879	0.518	4.49405e-52	0	Nhs	EndoC	Two-sided Wilcoxon test	0.25	25
3.97078e-69	1.17894	0.951	0.587	9.32497e-65	0	Pcdh7	EndoC	Two-sided Wilcoxon test	0.25	25
1.36075e-69	1.11666	0.993	0.73	3.19559e-65	0	Grip1	EndoC	Two-sided Wilcoxon test	0.25	25
8.15371e-73	1.09342	0.932	0.54	1.91482e-68	0	Npr3	EndoC	Two-sided Wilcoxon test	0.25	25
8.71697e-65	1.08009	0.949	0.612	2.04709e-60	0	Cdh11	EndoC	Two-sided Wilcoxon test	0.25	25
1.06979e-51	1.06182	0.9	0.537	2.5123e-47	0	Tmem108	EndoC	Two-sided Wilcoxon test	0.25	25
3.80047e-63	1.03438	0.914	0.582	8.92503e-59	0	Rps6ka2	EndoC	Two-sided Wilcoxon test	0.25	25
6.99757e-73	1.02421	0.953	0.784	1.64331e-68	0	Plagl1	EndoC	Two-sided Wilcoxon test	0.25	25
5.79615e-76	1.00683	0.939	0.585	1.36117e-71	0	Klhl4	EndoC	Two-sided Wilcoxon test	0.25	25
1.90788e-64	0.973626	0.946	0.575	4.48046e-60	0	Greb1l	EndoC	Two-sided Wilcoxon test	0.25	25
1.15308e-63	0.965026	0.977	0.745	2.70789e-59	0	Tmem164	EndoC	Two-sided Wilcoxon test	0.25	25
4.81857e-59	0.9565	0.853	0.468	1.13159e-54	0	Nrk	EndoC	Two-sided Wilcoxon test	0.25	25
3.84049e-55	0.920827	0.79	0.424	9.019e-51	0	Cped1	EndoC	Two-sided Wilcoxon test	0.25	25
4.28519e-72	0.912916	0.776	0.289	1.00633e-67	0	Irx5	EndoC	Two-sided Wilcoxon test	0.25	25
1.47273e-54	0.905833	0.956	0.72	3.45857e-50	0	Kcnq1ot1	EndoC	Two-sided Wilcoxon test	0.25	25
4.11202e-63	0.905718	0.988	0.765	9.65667e-59	0	Dlc1	EndoC	Two-sided Wilcoxon test	0.25	25
2.13465e-46	0.905655	0.773	0.438	5.013e-42	0	Csgalnact1	EndoC	Two-sided Wilcoxon test	0.25	25
2.28122e-47	0.901445	0.86	0.53	5.35722e-43	0	Ednrb	EndoC	Two-sided Wilcoxon test	0.25	25
1.12568e-16	0.887701	0.383	0.197	2.64355e-12	0	Ntm	EndoC	Two-sided Wilcoxon test	0.25	25
8.25593e-49	0.886872	0.942	0.711	1.93882e-44	0	Gmds	EndoC	Two-sided Wilcoxon test	0.25	25
2.1102e-50	0.840102	0.857	0.525	4.95559e-46	0	Cavin2	EndoC	Two-sided Wilcoxon test	0.25	25
3.06555e-40	0.835764	0.986	0.773	7.19914e-36	0	Prkg1	EndoC	Two-sided Wilcoxon test	0.25	25
3.09901e-49	0.827248	0.687	0.306	7.27772e-45	0	Frem1	EndoC	Two-sided Wilcoxon test	0.25	25
6.72139e-50	0.818708	0.949	0.671	1.57845e-45	0	Rapgef5	EndoC	Two-sided Wilcoxon test	0.25	25
1.01821e-61	0.810685	0.956	0.823	2.39117e-57	0	Aplp2	EndoC	Two-sided Wilcoxon test	0.25	25
2.5525e-57	0.802312	0.932	0.749	5.9943e-53	0	Ece1	EndoC	Two-sided Wilcoxon test	0.25	25
1.85181e-52	0.800655	0.998	0.863	4.3488e-48	0	Airn	EndoC	Two-sided Wilcoxon test	0.25	25
1.19994e-45	0.791441	0.96	0.774	2.81794e-41	0	Apoe	EndoC	Two-sided Wilcoxon test	0.25	25
1.47268e-27	0.791016	0.869	0.6	3.45845e-23	0	Hmcn1	EndoC	Two-sided Wilcoxon test	0.25	25
9.61486e-45	0.772704	0.993	0.784	2.25795e-40	0	Maml2	EndoC	Two-sided Wilcoxon test	0.25	25
9.37036e-30	0.770146	0.661	0.364	2.20054e-25	0	Tm4sf1	EndoC	Two-sided Wilcoxon test	0.25	25
7.01778e-15	0.757948	0.678	0.501	1.64805e-10	0	Nav3	EndoC	Two-sided Wilcoxon test	0.25	25
4.91234e-51	0.757263	0.949	0.664	1.15361e-46	0	Itpr2	EndoC	Two-sided Wilcoxon test	0.25	25
1.14197e-45	0.755739	0.827	0.538	2.68181e-41	0	Ggta1	EndoC	Two-sided Wilcoxon test	0.25	25
5.69773e-52	0.74762	0.946	0.727	1.33806e-47	0	Cgnl1	EndoC	Two-sided Wilcoxon test	0.25	25
2.61379e-56	0.74479	0.839	0.517	6.13823e-52	0	Snrk	EndoC	Two-sided Wilcoxon test	0.25	25
3.97734e-39	0.734597	0.949	0.759	9.34039e-35	0	Zfp521	EndoC	Two-sided Wilcoxon test	0.25	25
5.037e-29	0.72499	0.897	0.638	1.18289e-24	0	Kcnq5	EndoC	Two-sided Wilcoxon test	0.25	25
5.28404e-46	0.718096	0.918	0.674	1.2409e-41	0	Plvap	EndoC	Two-sided Wilcoxon test	0.25	25
8.51124e-50	0.703332	0.771	0.376	1.99878e-45	0	Col13a1	EndoC	Two-sided Wilcoxon test	0.25	25
1.74484e-32	0.68437	0.811	0.578	4.09758e-28	0	Gab1	EndoC	Two-sided Wilcoxon test	0.25	25
2.44717e-50	0.684068	0.771	0.406	5.74693e-46	0	Acer2	EndoC	Two-sided Wilcoxon test	0.25	25
4.65476e-40	0.682177	0.991	0.817	1.09312e-35	0	Mir99ahg	EndoC	Two-sided Wilcoxon test	0.25	25
3.29942e-37	0.680587	0.853	0.556	7.74836e-33	0	Ankrd44	EndoC	Two-sided Wilcoxon test	0.25	25
6.78558e-46	0.677702	0.638	0.295	1.59352e-41	0	Sema4d	EndoC	Two-sided Wilcoxon test	0.25	25
1.36003e-59	0.672795	0.678	0.242	3.1939e-55	0	Tec	EndoC	Two-sided Wilcoxon test	0.25	25
7.81557e-38	0.669825	0.925	0.825	1.83541e-33	0	Maged2	EndoC	Two-sided Wilcoxon test	0.25	25
3.55724e-37	0.65905	0.932	0.642	8.35382e-33	0	Emcn	EndoC	Two-sided Wilcoxon test	0.25	25
8.23243e-32	0.65092	0.984	0.792	1.9333e-27	0	Pde4d	EndoC	Two-sided Wilcoxon test	0.25	25
2.84309e-27	0.644696	0.857	0.641	6.6767e-23	0	Akap12	EndoC	Two-sided Wilcoxon test	0.25	25
4.04038e-32	0.639176	0.472	0.191	9.48843e-28	0	Cfh	EndoC	Two-sided Wilcoxon test	0.25	25
2.71703e-41	0.631698	0.701	0.355	6.38067e-37	0	Eps8	EndoC	Two-sided Wilcoxon test	0.25	25
2.06864e-37	0.62256	0.981	0.753	4.85799e-33	0	Gab2	EndoC	Two-sided Wilcoxon test	0.25	25
5.74734e-40	0.615202	0.661	0.31	1.34971e-35	0	Col26a1	EndoC	Two-sided Wilcoxon test	0.25	25
2.41178e-35	0.614833	0.811	0.537	5.66383e-31	0	Bex4	EndoC	Two-sided Wilcoxon test	0.25	25
4.15955e-30	0.61468	0.853	0.603	9.76829e-26	0	Itga9	EndoC	Two-sided Wilcoxon test	0.25	25
5.30786e-33	0.608691	0.942	0.659	1.2465e-28	0	Prkch	EndoC	Two-sided Wilcoxon test	0.25	25
4.95898e-39	0.604585	0.951	0.872	1.16457e-34	0	Rdx	EndoC	Two-sided Wilcoxon test	0.25	25
1.24156e-15	0.603648	0.589	0.383	2.91567e-11	0	Nrg1	EndoC	Two-sided Wilcoxon test	0.25	25
4.81565e-40	0.600798	0.974	0.824	1.13091e-35	0	Col4a1	EndoC	Two-sided Wilcoxon test	0.25	25
4.35933e-26	0.598361	0.785	0.538	1.02374e-21	0	Fry	EndoC	Two-sided Wilcoxon test	0.25	25
5.50637e-35	0.595246	0.953	0.776	1.29312e-30	0	Cemip2	EndoC	Two-sided Wilcoxon test	0.25	25
3.45682e-33	0.592266	0.972	0.786	8.11799e-29	0	St6galnac3	EndoC	Two-sided Wilcoxon test	0.25	25
7.40353e-31	0.586478	0.923	0.667	1.73864e-26	0	Lhfp	EndoC	Two-sided Wilcoxon test	0.25	25
1.526e-38	0.584207	0.818	0.53	3.58365e-34	0	Mmrn2	EndoC	Two-sided Wilcoxon test	0.25	25
4.4486e-14	0.583237	0.664	0.458	1.04471e-09	0	Epha7	EndoC	Two-sided Wilcoxon test	0.25	25
2.23512e-37	0.578254	0.993	0.876	5.24896e-33	0	Nfib	EndoC	Two-sided Wilcoxon test	0.25	25
6.75191e-36	0.575711	0.836	0.526	1.58562e-31	0	Inpp4b	EndoC	Two-sided Wilcoxon test	0.25	25
1.00848e-40	0.574108	0.974	0.778	2.36832e-36	0	Col4a2	EndoC	Two-sided Wilcoxon test	0.25	25
1.80621e-29	0.573026	0.914	0.706	4.24169e-25	0	Tspan18	EndoC	Two-sided Wilcoxon test	0.25	25
1.12127e-28	0.567567	0.869	0.627	2.6332e-24	0	Sorbs1	EndoC	Two-sided Wilcoxon test	0.25	25
2.50104e-42	0.567054	0.706	0.353	5.87345e-38	0	Slc45a4	EndoC	Two-sided Wilcoxon test	0.25	25
1.44663e-35	0.562247	0.853	0.605	3.39727e-31	0	Myo6	EndoC	Two-sided Wilcoxon test	0.25	25
3.96044e-13	0.560226	0.629	0.454	9.30071e-09	0	Lrmda	EndoC	Two-sided Wilcoxon test	0.25	25
2.15595e-34	0.55879	0.61	0.303	5.06304e-30	0	St8sia1	EndoC	Two-sided Wilcoxon test	0.25	25
3.99848e-22	0.558074	0.614	0.389	9.39004e-18	0	Bace2	EndoC	Two-sided Wilcoxon test	0.25	25
8.4888e-40	0.55719	0.743	0.395	1.99351e-35	0	Gpr182	EndoC	Two-sided Wilcoxon test	0.25	25
8.517e-28	0.549822	0.974	0.806	2.00013e-23	0	Ptk2	EndoC	Two-sided Wilcoxon test	0.25	25
1.61033e-31	0.548615	0.834	0.561	3.78169e-27	0	Shank3	EndoC	Two-sided Wilcoxon test	0.25	25
8.56211e-25	0.545987	0.764	0.522	2.01073e-20	0	Ctla2a	EndoC	Two-sided Wilcoxon test	0.25	25
7.70338e-30	0.54101	0.965	0.755	1.80906e-25	0	Rbms3	EndoC	Two-sided Wilcoxon test	0.25	25
4.00259e-38	0.539035	0.752	0.416	9.39969e-34	0	Hand2os1	EndoC	Two-sided Wilcoxon test	0.25	25
6.02238e-33	0.538972	0.829	0.542	1.4143e-28	0	Adgrf5	EndoC	Two-sided Wilcoxon test	0.25	25
2.66002e-18	0.538519	0.407	0.204	6.2468e-14	0	Kcnt2	EndoC	Two-sided Wilcoxon test	0.25	25
1.33805e-24	0.53732	0.857	0.628	3.14228e-20	0	Itga6	EndoC	Two-sided Wilcoxon test	0.25	25
2.53411e-21	0.536817	0.666	0.427	5.95111e-17	0	Cobll1	EndoC	Two-sided Wilcoxon test	0.25	25
7.2244e-27	0.535547	0.902	0.713	1.69658e-22	0	Svil	EndoC	Two-sided Wilcoxon test	0.25	25
1.51494e-31	0.532126	0.953	0.811	3.55769e-27	0	Lims1	EndoC	Two-sided Wilcoxon test	0.25	25
2.31167e-29	0.518408	0.914	0.746	5.42872e-25	0	Atp1b3	EndoC	Two-sided Wilcoxon test	0.25	25
3.69216e-25	0.518113	0.671	0.405	8.67067e-21	0	Unc13b	EndoC	Two-sided Wilcoxon test	0.25	25
3.03107e-31	0.516636	0.942	0.74	7.11816e-27	0	Nrp1	EndoC	Two-sided Wilcoxon test	0.25	25
1.71299e-21	0.515881	0.832	0.664	4.02278e-17	0	Ccnd2	EndoC	Two-sided Wilcoxon test	0.25	25
1.99982e-23	0.514948	0.512	0.255	4.69637e-19	0	Corin	EndoC	Two-sided Wilcoxon test	0.25	25
3.40325e-24	0.511776	0.958	0.899	7.99218e-20	0	Fabp5	EndoC	Two-sided Wilcoxon test	0.25	25
4.13356e-29	0.509226	0.645	0.368	9.70725e-25	0	Acer3	EndoC	Two-sided Wilcoxon test	0.25	25
1.36002e-31	0.509093	0.937	0.817	3.19387e-27	0	Igfbp4	EndoC	Two-sided Wilcoxon test	0.25	25
4.17323e-23	0.508805	0.834	0.62	9.80042e-19	0	Peak1	EndoC	Two-sided Wilcoxon test	0.25	25
1.06221e-27	0.508246	0.977	0.788	2.49449e-23	0	Pard3	EndoC	Two-sided Wilcoxon test	0.25	25
1.73806e-29	0.507088	0.974	0.814	4.08165e-25	0	Col18a1	EndoC	Two-sided Wilcoxon test	0.25	25
1.73009e-30	0.505	0.759	0.514	4.06294e-26	0	Rap2a	EndoC	Two-sided Wilcoxon test	0.25	25
5.71444e-38	0.504981	0.706	0.344	1.34198e-33	0	Gja4	EndoC	Two-sided Wilcoxon test	0.25	25
3.74831e-26	0.500513	0.843	0.605	8.80253e-22	0	Klhl6	EndoC	Two-sided Wilcoxon test	0.25	25
2.22813e-24	0.494954	0.757	0.546	5.23255e-20	0	Il6st	EndoC	Two-sided Wilcoxon test	0.25	25
3.7356e-26	0.494439	0.843	0.56	8.77269e-22	0	Arhgap6	EndoC	Two-sided Wilcoxon test	0.25	25
5.56518e-28	0.485649	0.995	0.882	1.30693e-23	0	Igf2r	EndoC	Two-sided Wilcoxon test	0.25	25
2.55946e-22	0.485321	0.963	0.874	6.01064e-18	0	Mest	EndoC	Two-sided Wilcoxon test	0.25	25
3.4753e-27	0.484266	0.925	0.65	8.16139e-23	0	Tshz2	EndoC	Two-sided Wilcoxon test	0.25	25
1.91195e-29	0.480921	0.988	0.88	4.49003e-25	0	Fn1	EndoC	Two-sided Wilcoxon test	0.25	25
1.75559e-21	0.480743	0.909	0.716	4.12282e-17	0	Mbd5	EndoC	Two-sided Wilcoxon test	0.25	25
3.69663e-26	0.47681	0.752	0.515	8.68116e-22	0	Ptpn14	EndoC	Two-sided Wilcoxon test	0.25	25
9.44089e-40	0.474636	0.491	0.172	2.2171e-35	0	Pla2g7	EndoC	Two-sided Wilcoxon test	0.25	25
1.02347e-19	0.472685	0.925	0.802	2.40351e-15	0	Ctsl	EndoC	Two-sided Wilcoxon test	0.25	25
5.81499e-40	0.472325	0.584	0.266	1.36559e-35	0	Gm30648	EndoC	Two-sided Wilcoxon test	0.25	25
1.70186e-23	0.472197	0.958	0.765	3.99666e-19	0	Zeb1	EndoC	Two-sided Wilcoxon test	0.25	25
7.06437e-17	0.472176	0.843	0.681	1.659e-12	0	Nxn	EndoC	Two-sided Wilcoxon test	0.25	25
8.89635e-21	0.471263	0.797	0.587	2.08922e-16	0	Nhsl2	EndoC	Two-sided Wilcoxon test	0.25	25
1.19794e-28	0.47089	0.771	0.528	2.81324e-24	0	Vamp5	EndoC	Two-sided Wilcoxon test	0.25	25
9.93206e-06	0.469285	0.255	0.162	0.233244	0	Rtl4	EndoC	Two-sided Wilcoxon test	0.25	25
3.11286e-18	0.468599	0.79	0.556	7.31024e-14	0	Rasgef1b	EndoC	Two-sided Wilcoxon test	0.25	25
2.37744e-19	0.458717	0.967	0.811	5.58319e-15	0	Baz2b	EndoC	Two-sided Wilcoxon test	0.25	25
3.17174e-32	0.457662	0.575	0.276	7.44852e-28	0	Fam13c	EndoC	Two-sided Wilcoxon test	0.25	25
6.5436e-25	0.450523	0.881	0.639	1.5367e-20	0	Cd93	EndoC	Two-sided Wilcoxon test	0.25	25
7.2805e-23	0.448896	0.645	0.434	1.70975e-18	0	Arhgef9	EndoC	Two-sided Wilcoxon test	0.25	25
4.49122e-23	0.448007	0.902	0.72	1.05472e-18	0	Phldb2	EndoC	Two-sided Wilcoxon test	0.25	25
1.37752e-19	0.446936	0.958	0.734	3.23497e-15	0	Arhgap31	EndoC	Two-sided Wilcoxon test	0.25	25
3.72242e-26	0.445457	0.857	0.633	8.74174e-22	0	Tmem176b	EndoC	Two-sided Wilcoxon test	0.25	25
3.1321e-22	0.445432	0.853	0.67	7.35542e-18	0	Phactr2	EndoC	Two-sided Wilcoxon test	0.25	25
9.89085e-22	0.44301	0.904	0.739	2.32277e-17	0	Nid1	EndoC	Two-sided Wilcoxon test	0.25	25
4.67398e-23	0.44252	0.292	0.093	1.09764e-18	0	Slc7a14	EndoC	Two-sided Wilcoxon test	0.25	25
1.4406e-18	0.441894	0.811	0.603	3.3831e-14	0	Shroom4	EndoC	Two-sided Wilcoxon test	0.25	25
4.6531e-25	0.436359	0.614	0.34	1.09273e-20	0	Bmx	EndoC	Two-sided Wilcoxon test	0.25	25
1.57529e-21	0.435611	0.907	0.711	3.69941e-17	0	Sik3	EndoC	Two-sided Wilcoxon test	0.25	25
2.6064e-20	0.435142	0.9	0.774	6.12087e-16	0	Apc	EndoC	Two-sided Wilcoxon test	0.25	25
4.98993e-21	0.432102	0.97	0.918	1.17184e-16	0	Mdk	EndoC	Two-sided Wilcoxon test	0.25	25
1.15057e-20	0.429387	0.897	0.724	2.70199e-16	0	Spats2	EndoC	Two-sided Wilcoxon test	0.25	25
4.00215e-17	0.427853	0.547	0.327	9.39865e-13	0	Gucy1a2	EndoC	Two-sided Wilcoxon test	0.25	25
9.17914e-30	0.427064	0.668	0.365	2.15563e-25	0	Vwf	EndoC	Two-sided Wilcoxon test	0.25	25
1.85052e-23	0.426904	0.918	0.872	4.34577e-19	0	Marcks	EndoC	Two-sided Wilcoxon test	0.25	25
3.01441e-20	0.414169	0.743	0.539	7.07905e-16	0	4930402H24Rik	EndoC	Two-sided Wilcoxon test	0.25	25
6.41496e-19	0.413971	0.71	0.488	1.50649e-14	0	Klhl13	EndoC	Two-sided Wilcoxon test	0.25	25
8.16714e-27	0.40927	0.701	0.415	1.91797e-22	0	Lmo7	EndoC	Two-sided Wilcoxon test	0.25	25
4.33202e-07	0.409123	0.259	0.153	0.0101733	0	Gm20631	EndoC	Two-sided Wilcoxon test	0.25	25
3.59875e-17	0.407867	0.832	0.631	8.45131e-13	0	Foxo1	EndoC	Two-sided Wilcoxon test	0.25	25
1.99553e-26	0.407682	0.341	0.113	4.68629e-22	0	Ccdc3	EndoC	Two-sided Wilcoxon test	0.25	25
9.97157e-19	0.407465	0.853	0.637	2.34172e-14	0	Sh3d19	EndoC	Two-sided Wilcoxon test	0.25	25
2.46379e-24	0.405394	0.813	0.586	5.78597e-20	0	Rgs3	EndoC	Two-sided Wilcoxon test	0.25	25
4.06851e-19	0.404617	0.918	0.73	9.55449e-15	0	Itpr1	EndoC	Two-sided Wilcoxon test	0.25	25
2.80509e-23	0.401758	0.771	0.527	6.58748e-19	0	Shroom2	EndoC	Two-sided Wilcoxon test	0.25	25
6.48083e-19	0.401316	0.832	0.593	1.52196e-14	0	Dock9	EndoC	Two-sided Wilcoxon test	0.25	25
1.20733e-22	0.39949	0.846	0.621	2.83529e-18	0	Dock6	EndoC	Two-sided Wilcoxon test	0.25	25
1.17704e-12	0.396595	0.864	0.735	2.76417e-08	0	Id2	EndoC	Two-sided Wilcoxon test	0.25	25
1.13591e-17	0.395731	0.907	0.716	2.66757e-13	0	Rasal2	EndoC	Two-sided Wilcoxon test	0.25	25
2.57566e-19	0.394964	0.853	0.645	6.04867e-15	0	Eng	EndoC	Two-sided Wilcoxon test	0.25	25
2.01195e-13	0.394886	0.853	0.666	4.72486e-09	0	Ghr	EndoC	Two-sided Wilcoxon test	0.25	25
8.30493e-22	0.393964	0.783	0.576	1.95033e-17	0	Arhgdib	EndoC	Two-sided Wilcoxon test	0.25	25
2.08e-21	0.392902	0.839	0.668	4.88467e-17	0	Sms	EndoC	Two-sided Wilcoxon test	0.25	25
3.2328e-23	0.391986	0.741	0.513	7.5919e-19	0	Tmem176a	EndoC	Two-sided Wilcoxon test	0.25	25
3.266e-18	0.391594	0.678	0.474	7.66988e-14	0	Bgn	EndoC	Two-sided Wilcoxon test	0.25	25
5.08875e-11	0.391067	0.488	0.32	1.19504e-06	0	Fhit	EndoC	Two-sided Wilcoxon test	0.25	25
4.9941e-23	0.390462	0.75	0.527	1.17281e-18	0	Rasa3	EndoC	Two-sided Wilcoxon test	0.25	25
6.54655e-27	0.389394	0.519	0.255	1.53739e-22	0	Gldc	EndoC	Two-sided Wilcoxon test	0.25	25
1.82881e-17	0.386307	0.64	0.406	4.29478e-13	0	Esrrg	EndoC	Two-sided Wilcoxon test	0.25	25
1.11592e-13	0.384647	0.514	0.329	2.62062e-09	0	Sobp	EndoC	Two-sided Wilcoxon test	0.25	25
3.42814e-18	0.382492	0.902	0.684	8.05065e-14	0	Magi3	EndoC	Two-sided Wilcoxon test	0.25	25
8.08043e-16	0.382292	0.932	0.779	1.89761e-11	0	Dock1	EndoC	Two-sided Wilcoxon test	0.25	25
1.81285e-20	0.380774	0.682	0.433	4.2573e-16	0	Sncaip	EndoC	Two-sided Wilcoxon test	0.25	25
3.60924e-18	0.380445	0.687	0.462	8.47594e-14	0	Ctdspl	EndoC	Two-sided Wilcoxon test	0.25	25
3.46487e-22	0.379926	0.841	0.63	8.1369e-18	0	Ecscr	EndoC	Two-sided Wilcoxon test	0.25	25
3.01142e-13	0.378627	0.918	0.75	7.07201e-09	0	Zswim6	EndoC	Two-sided Wilcoxon test	0.25	25
7.5088e-18	0.378507	0.769	0.557	1.76337e-13	0	Psd3	EndoC	Two-sided Wilcoxon test	0.25	25
3.74259e-32	0.378217	0.526	0.222	8.78909e-28	0	Lgals9	EndoC	Two-sided Wilcoxon test	0.25	25
1.12336e-17	0.377779	0.988	0.841	2.63809e-13	0	Nfia	EndoC	Two-sided Wilcoxon test	0.25	25
1.22918e-19	0.377598	0.944	0.735	2.88659e-15	0	Fbn1	EndoC	Two-sided Wilcoxon test	0.25	25
2.06322e-21	0.376876	0.836	0.632	4.84527e-17	0	Cpd	EndoC	Two-sided Wilcoxon test	0.25	25
8.29759e-18	0.376558	0.379	0.175	1.94861e-13	0	Ppp1r14c	EndoC	Two-sided Wilcoxon test	0.25	25
2.08579e-14	0.376329	0.575	0.376	4.89828e-10	0	Arhgef3	EndoC	Two-sided Wilcoxon test	0.25	25
4.32403e-16	0.373356	0.764	0.59	1.01545e-11	0	Fnbp1	EndoC	Two-sided Wilcoxon test	0.25	25
5.5504e-13	0.371266	0.909	0.732	1.30346e-08	0	Camta1	EndoC	Two-sided Wilcoxon test	0.25	25
7.923e-18	0.370838	0.839	0.64	1.86064e-13	0	Klhdc10	EndoC	Two-sided Wilcoxon test	0.25	25
6.68089e-15	0.37055	0.893	0.72	1.56894e-10	0	Zfp608	EndoC	Two-sided Wilcoxon test	0.25	25
2.37784e-16	0.36928	0.855	0.709	5.58411e-12	0	Gls	EndoC	Two-sided Wilcoxon test	0.25	25
3.77705e-14	0.368252	0.953	0.802	8.87003e-10	0	Jmjd1c	EndoC	Two-sided Wilcoxon test	0.25	25
2.21964e-17	0.368203	0.783	0.636	5.21261e-13	0	Anxa6	EndoC	Two-sided Wilcoxon test	0.25	25
1.46384e-19	0.367626	0.65	0.424	3.43768e-15	0	Ifitm3	EndoC	Two-sided Wilcoxon test	0.25	25
1.27372e-14	0.366745	0.89	0.701	2.99121e-10	0	Tbc1d5	EndoC	Two-sided Wilcoxon test	0.25	25
7.56843e-21	0.365902	0.942	0.695	1.77737e-16	0	Elmo1	EndoC	Two-sided Wilcoxon test	0.25	25
2.4709e-20	0.365569	0.862	0.662	5.80265e-16	0	Plxnd1	EndoC	Two-sided Wilcoxon test	0.25	25
5.04505e-22	0.365489	0.752	0.488	1.18478e-17	0	Hand2	EndoC	Two-sided Wilcoxon test	0.25	25
1.14635e-18	0.365043	0.773	0.565	2.69208e-14	0	Arap3	EndoC	Two-sided Wilcoxon test	0.25	25
2.21039e-19	0.364964	0.97	0.825	5.19088e-15	0	Ext1	EndoC	Two-sided Wilcoxon test	0.25	25
3.06627e-11	0.361207	0.617	0.425	7.20082e-07	0	Spon1	EndoC	Two-sided Wilcoxon test	0.25	25
4.15909e-18	0.360745	0.738	0.512	9.76721e-14	0	Prkca	EndoC	Two-sided Wilcoxon test	0.25	25
5.45799e-19	0.360116	0.96	0.793	1.28176e-14	0	Asap1	EndoC	Two-sided Wilcoxon test	0.25	25
1.45345e-20	0.359677	0.888	0.814	3.41328e-16	0	Ifitm2	EndoC	Two-sided Wilcoxon test	0.25	25
7.02748e-19	0.358955	0.479	0.252	1.65033e-14	0	Morrbid	EndoC	Two-sided Wilcoxon test	0.25	25
5.4549e-20	0.358913	0.544	0.326	1.28103e-15	0	Rnf141	EndoC	Two-sided Wilcoxon test	0.25	25
1.71718e-17	0.358245	0.82	0.576	4.03262e-13	0	Pde1c	EndoC	Two-sided Wilcoxon test	0.25	25
1.15175e-25	0.357534	0.421	0.176	2.70477e-21	0	Clca3a1	EndoC	Two-sided Wilcoxon test	0.25	25
2.41168e-13	0.356754	0.748	0.555	5.66358e-09	0	Man1a	EndoC	Two-sided Wilcoxon test	0.25	25
2.38036e-14	0.354811	0.864	0.725	5.59004e-10	0	Zfp36l1	EndoC	Two-sided Wilcoxon test	0.25	25
1.61487e-24	0.354227	0.598	0.325	3.79236e-20	0	Gatm	EndoC	Two-sided Wilcoxon test	0.25	25
2.82067e-13	0.352812	0.888	0.73	6.62407e-09	0	Fndc3a	EndoC	Two-sided Wilcoxon test	0.25	25
9.06131e-25	0.351728	0.631	0.37	2.12796e-20	0	Foxc1	EndoC	Two-sided Wilcoxon test	0.25	25
2.09744e-18	0.351409	0.972	0.803	4.92562e-14	0	Msi2	EndoC	Two-sided Wilcoxon test	0.25	25
5.2279e-12	0.349502	0.949	0.809	1.22772e-07	0	Foxn3	EndoC	Two-sided Wilcoxon test	0.25	25
2.50285e-13	0.349255	0.722	0.521	5.87768e-09	0	Sema6d	EndoC	Two-sided Wilcoxon test	0.25	25
4.1998e-14	0.346863	0.902	0.71	9.86282e-10	0	Prkce	EndoC	Two-sided Wilcoxon test	0.25	25
1.48887e-16	0.342144	0.942	0.859	3.49646e-12	0	Cd81	EndoC	Two-sided Wilcoxon test	0.25	25
4.20624e-20	0.337047	0.937	0.725	9.87792e-16	0	Calcrl	EndoC	Two-sided Wilcoxon test	0.25	25
8.76927e-14	0.335232	0.766	0.61	2.05938e-09	0	Spata6	EndoC	Two-sided Wilcoxon test	0.25	25
8.39478e-12	0.333106	0.921	0.757	1.97143e-07	0	Srgap1	EndoC	Two-sided Wilcoxon test	0.25	25
3.66357e-11	0.331462	0.474	0.313	8.60353e-07	0	Pip5k1b	EndoC	Two-sided Wilcoxon test	0.25	25
1.94918e-11	0.3309	0.589	0.437	4.57745e-07	0	Zdhhc15	EndoC	Two-sided Wilcoxon test	0.25	25
8.14861e-15	0.329919	0.972	0.815	1.91362e-10	0	Akap13	EndoC	Two-sided Wilcoxon test	0.25	25
1.40924e-19	0.328171	0.432	0.222	3.30947e-15	0	Ctsk	EndoC	Two-sided Wilcoxon test	0.25	25
7.45077e-16	0.326088	0.829	0.645	1.74974e-11	0	Babam2	EndoC	Two-sided Wilcoxon test	0.25	25
1.63216e-09	0.326022	0.722	0.553	3.83296e-05	0	Plekhg1	EndoC	Two-sided Wilcoxon test	0.25	25
2.46281e-16	0.325312	0.797	0.572	5.78366e-12	0	Ccnd1	EndoC	Two-sided Wilcoxon test	0.25	25
2.78846e-09	0.325115	0.97	0.775	6.54842e-05	0	Ptprm	EndoC	Two-sided Wilcoxon test	0.25	25
1.60206e-16	0.324499	0.654	0.447	3.76227e-12	0	Ablim1	EndoC	Two-sided Wilcoxon test	0.25	25
2.21439e-13	0.324435	0.869	0.717	5.20028e-09	0	Slc38a1	EndoC	Two-sided Wilcoxon test	0.25	25
6.09594e-10	0.324379	0.836	0.669	1.43157e-05	0	Ralgapa2	EndoC	Two-sided Wilcoxon test	0.25	25
2.85854e-12	0.323787	0.967	0.815	6.713e-08	0	Ppp3ca	EndoC	Two-sided Wilcoxon test	0.25	25
4.27005e-13	0.323317	0.785	0.588	1.00278e-08	0	Ica1	EndoC	Two-sided Wilcoxon test	0.25	25
2.5215e-20	0.323179	0.598	0.362	5.92149e-16	0	Epas1	EndoC	Two-sided Wilcoxon test	0.25	25
5.26064e-20	0.322718	0.629	0.407	1.23541e-15	0	Dok4	EndoC	Two-sided Wilcoxon test	0.25	25
4.32633e-15	0.321899	0.713	0.543	1.016e-10	0	Smap2	EndoC	Two-sided Wilcoxon test	0.25	25
2.21248e-20	0.321057	0.603	0.37	5.19579e-16	0	Tspan4	EndoC	Two-sided Wilcoxon test	0.25	25
2.04266e-09	0.319875	0.914	0.769	4.79699e-05	0	Etv6	EndoC	Two-sided Wilcoxon test	0.25	25
1.07353e-18	0.319616	0.846	0.655	2.52107e-14	0	Gcc2	EndoC	Two-sided Wilcoxon test	0.25	25
1.64053e-13	0.3188	0.706	0.532	3.85262e-09	0	Slc7a1	EndoC	Two-sided Wilcoxon test	0.25	25
8.66992e-20	0.318101	0.509	0.269	2.03604e-15	0	Gucy1b1	EndoC	Two-sided Wilcoxon test	0.25	25
1.91315e-18	0.317404	0.787	0.569	4.49285e-14	0	Tfpi	EndoC	Two-sided Wilcoxon test	0.25	25
7.61645e-14	0.317373	0.827	0.65	1.78865e-09	0	Aak1	EndoC	Two-sided Wilcoxon test	0.25	25
8.30309e-35	0.317343	0.379	0.108	1.9499e-30	0	Irx6	EndoC	Two-sided Wilcoxon test	0.25	25
9.11296e-13	0.316841	0.928	0.764	2.14009e-08	0	Nf1	EndoC	Two-sided Wilcoxon test	0.25	25
4.94399e-30	0.315547	0.369	0.121	1.16105e-25	0	Prr15	EndoC	Two-sided Wilcoxon test	0.25	25
3.6252e-14	0.314896	0.734	0.551	8.51342e-10	0	Phkb	EndoC	Two-sided Wilcoxon test	0.25	25
6.67716e-17	0.314418	0.93	0.734	1.56806e-12	0	Cdh5	EndoC	Two-sided Wilcoxon test	0.25	25
8.43039e-14	0.314303	0.956	0.791	1.97979e-09	0	Magi1	EndoC	Two-sided Wilcoxon test	0.25	25
2.51804e-18	0.314288	0.614	0.419	5.91337e-14	0	Taok2	EndoC	Two-sided Wilcoxon test	0.25	25
7.92711e-09	0.314214	0.502	0.364	0.00018616	0	Jazf1	EndoC	Two-sided Wilcoxon test	0.25	25
1.91188e-12	0.313739	0.977	0.864	4.48985e-08	0	Qk	EndoC	Two-sided Wilcoxon test	0.25	25
7.51e-13	0.313605	0.794	0.627	1.76365e-08	0	Csnk1g1	EndoC	Two-sided Wilcoxon test	0.25	25
1.65612e-16	0.313417	0.386	0.188	3.88922e-12	0	Lypd6	EndoC	Two-sided Wilcoxon test	0.25	25
3.51293e-15	0.313116	0.808	0.584	8.24977e-11	0	Tgfbr2	EndoC	Two-sided Wilcoxon test	0.25	25
4.85053e-13	0.312844	0.773	0.562	1.1391e-08	0	Plxnc1	EndoC	Two-sided Wilcoxon test	0.25	25
1.75297e-19	0.312544	0.666	0.421	4.11667e-15	0	Dcbld2	EndoC	Two-sided Wilcoxon test	0.25	25
9.58089e-13	0.312338	0.942	0.77	2.24998e-08	0	Fbxl17	EndoC	Two-sided Wilcoxon test	0.25	25
9.07767e-09	0.312243	0.731	0.597	0.00021318	0	Raph1	EndoC	Two-sided Wilcoxon test	0.25	25
3.68309e-07	0.311598	0.551	0.43	0.00864936	0	Uty	EndoC	Two-sided Wilcoxon test	0.25	25
3.46498e-17	0.311311	0.71	0.466	8.13716e-13	0	Gsta4	EndoC	Two-sided Wilcoxon test	0.25	25
8.01397e-14	0.311261	0.97	0.844	1.882e-09	0	Rbms1	EndoC	Two-sided Wilcoxon test	0.25	25
1.40479e-17	0.310991	0.381	0.176	3.299e-13	0	Dlk1	EndoC	Two-sided Wilcoxon test	0.25	25
1.77352e-16	0.310205	0.523	0.309	4.16492e-12	0	Fam110b	EndoC	Two-sided Wilcoxon test	0.25	25
1.98577e-12	0.3101	0.841	0.62	4.66337e-08	0	Bmpr1a	EndoC	Two-sided Wilcoxon test	0.25	25
4.78363e-14	0.309981	0.946	0.924	1.12339e-09	0	H19	EndoC	Two-sided Wilcoxon test	0.25	25
8.36938e-16	0.30949	0.755	0.587	1.96546e-11	0	Vamp8	EndoC	Two-sided Wilcoxon test	0.25	25
3.04911e-16	0.308817	0.652	0.442	7.16053e-12	0	Lin28b	EndoC	Two-sided Wilcoxon test	0.25	25
3.0866e-18	0.308205	0.325	0.133	7.24858e-14	0	Slc24a4	EndoC	Two-sided Wilcoxon test	0.25	25
6.25482e-14	0.307696	0.757	0.585	1.46888e-09	0	Cyp20a1	EndoC	Two-sided Wilcoxon test	0.25	25
8.29935e-15	0.307615	0.97	0.788	1.94902e-10	0	Ptprg	EndoC	Two-sided Wilcoxon test	0.25	25
5.6556e-09	0.307597	0.657	0.488	0.000132816	0	Itga1	EndoC	Two-sided Wilcoxon test	0.25	25
5.34124e-10	0.306952	0.53	0.391	1.25434e-05	0	Ern1	EndoC	Two-sided Wilcoxon test	0.25	25
4.15492e-20	0.306496	0.596	0.342	9.75742e-16	0	Lrig1	EndoC	Two-sided Wilcoxon test	0.25	25
4.23454e-21	0.304557	0.591	0.368	9.94439e-17	0	Tmem205	EndoC	Two-sided Wilcoxon test	0.25	25
2.15659e-22	0.30391	0.783	0.565	5.06453e-18	0	Il11ra1	EndoC	Two-sided Wilcoxon test	0.25	25
1.4231e-16	0.303589	0.523	0.336	3.34201e-12	0	Cers4	EndoC	Two-sided Wilcoxon test	0.25	25
2.98455e-09	0.302563	0.535	0.396	7.00891e-05	0	Rin2	EndoC	Two-sided Wilcoxon test	0.25	25
1.61215e-12	0.301165	0.748	0.575	3.78597e-08	0	Dennd1b	EndoC	Two-sided Wilcoxon test	0.25	25
3.62763e-17	0.300324	0.4	0.211	8.51912e-13	0	Abat	EndoC	Two-sided Wilcoxon test	0.25	25
2.6259e-16	0.29977	0.972	0.94	6.16666e-12	0	Igf2	EndoC	Two-sided Wilcoxon test	0.25	25
4.34766e-16	0.299007	0.965	0.76	1.02101e-11	0	Mast4	EndoC	Two-sided Wilcoxon test	0.25	25
2.35187e-12	0.296903	0.724	0.55	5.52314e-08	0	Trappc9	EndoC	Two-sided Wilcoxon test	0.25	25
1.35892e-12	0.296207	0.914	0.818	3.1913e-08	0	Sept11	EndoC	Two-sided Wilcoxon test	0.25	25
3.00825e-09	0.294488	0.921	0.762	7.06458e-05	0	Srgap2	EndoC	Two-sided Wilcoxon test	0.25	25
3.86488e-11	0.294366	0.785	0.609	9.07629e-07	0	Sec24d	EndoC	Two-sided Wilcoxon test	0.25	25
3.22111e-05	0.294321	0.682	0.587	0.756445	0	Fosb	EndoC	Two-sided Wilcoxon test	0.25	25
2.29796e-16	0.292082	0.862	0.643	5.39654e-12	0	Notch1	EndoC	Two-sided Wilcoxon test	0.25	25
4.17856e-12	0.291879	0.629	0.458	9.81294e-08	0	Pcca	EndoC	Two-sided Wilcoxon test	0.25	25
4.08015e-15	0.291688	0.881	0.725	9.58183e-11	0	Snx5	EndoC	Two-sided Wilcoxon test	0.25	25
2.8561e-14	0.291663	0.72	0.55	6.70726e-10	0	Gm1673	EndoC	Two-sided Wilcoxon test	0.25	25
5.05427e-10	0.291441	0.874	0.712	1.18694e-05	0	Map3k3	EndoC	Two-sided Wilcoxon test	0.25	25
1.80509e-10	0.289956	0.871	0.757	4.23907e-06	0	Ube2h	EndoC	Two-sided Wilcoxon test	0.25	25
2.24383e-14	0.289618	0.825	0.645	5.26942e-10	0	Icam2	EndoC	Two-sided Wilcoxon test	0.25	25
7.65268e-09	0.289532	0.944	0.788	0.000179716	0	Exoc4	EndoC	Two-sided Wilcoxon test	0.25	25
1.22439e-13	0.288782	0.757	0.57	2.87535e-09	0	Ets2	EndoC	Two-sided Wilcoxon test	0.25	25
3.29154e-09	0.286695	0.925	0.831	7.72985e-05	0	Ppp1r12a	EndoC	Two-sided Wilcoxon test	0.25	25
2.39826e-16	0.286674	0.645	0.444	5.63206e-12	0	Ecm1	EndoC	Two-sided Wilcoxon test	0.25	25
1.95651e-13	0.286614	0.93	0.816	4.59466e-09	0	Ramp2	EndoC	Two-sided Wilcoxon test	0.25	25
3.05513e-10	0.286545	0.605	0.457	7.17466e-06	0	Gm49692	EndoC	Two-sided Wilcoxon test	0.25	25
1.44557e-10	0.28613	0.752	0.606	3.39478e-06	0	Parp8	EndoC	Two-sided Wilcoxon test	0.25	25
6.9365e-19	0.285777	0.614	0.364	1.62897e-14	0	Hunk	EndoC	Two-sided Wilcoxon test	0.25	25
4.06031e-13	0.284986	0.848	0.677	9.53522e-09	0	Arhgap29	EndoC	Two-sided Wilcoxon test	0.25	25
5.92371e-12	0.284015	0.879	0.741	1.39112e-07	0	Lamp2	EndoC	Two-sided Wilcoxon test	0.25	25
1.69658e-16	0.28334	0.617	0.395	3.98424e-12	0	Cited2	EndoC	Two-sided Wilcoxon test	0.25	25
2.11346e-12	0.283205	0.918	0.85	4.96325e-08	0	Bex3	EndoC	Two-sided Wilcoxon test	0.25	25
1.75437e-15	0.282823	0.797	0.595	4.11996e-11	0	Uvrag	EndoC	Two-sided Wilcoxon test	0.25	25
3.0165e-14	0.28237	0.89	0.849	7.08395e-10	0	Sfr1	EndoC	Two-sided Wilcoxon test	0.25	25
2.78317e-22	0.281489	0.491	0.255	6.536e-18	0	Sall1	EndoC	Two-sided Wilcoxon test	0.25	25
1.04099e-09	0.281237	0.942	0.804	2.44465e-05	0	Snd1	EndoC	Two-sided Wilcoxon test	0.25	25
4.4101e-10	0.281034	0.715	0.547	1.03567e-05	0	Hdac7	EndoC	Two-sided Wilcoxon test	0.25	25
8.16921e-10	0.279576	0.839	0.735	1.91846e-05	0	Rbp1	EndoC	Two-sided Wilcoxon test	0.25	25
6.85783e-12	0.279243	0.829	0.708	1.61049e-07	0	Tle5	EndoC	Two-sided Wilcoxon test	0.25	25
1.54213e-12	0.278487	0.89	0.711	3.62154e-08	0	Agap1	EndoC	Two-sided Wilcoxon test	0.25	25
1.58293e-09	0.278199	0.75	0.583	3.71735e-05	0	Rreb1	EndoC	Two-sided Wilcoxon test	0.25	25
4.13171e-12	0.278097	0.703	0.538	9.7029e-08	0	Ophn1	EndoC	Two-sided Wilcoxon test	0.25	25
1.46123e-13	0.276623	0.647	0.466	3.43154e-09	0	Lipa	EndoC	Two-sided Wilcoxon test	0.25	25
1.01547e-11	0.275934	0.874	0.704	2.38473e-07	0	Ecpas	EndoC	Two-sided Wilcoxon test	0.25	25
6.49182e-16	0.274466	0.827	0.561	1.52454e-11	0	Ldb2	EndoC	Two-sided Wilcoxon test	0.25	25
9.02486e-09	0.274418	0.96	0.925	0.00021194	0	Hsp90b1	EndoC	Two-sided Wilcoxon test	0.25	25
5.94242e-09	0.274415	0.694	0.546	0.000139552	0	Mthfd1l	EndoC	Two-sided Wilcoxon test	0.25	25
7.01774e-13	0.273451	0.841	0.675	1.64805e-08	0	Cep170	EndoC	Two-sided Wilcoxon test	0.25	25
4.78769e-14	0.27291	0.561	0.369	1.12434e-09	0	Pawr	EndoC	Two-sided Wilcoxon test	0.25	25
1.45736e-13	0.272808	0.593	0.443	3.42247e-09	0	Mxd4	EndoC	Two-sided Wilcoxon test	0.25	25
5.49262e-11	0.272231	0.755	0.592	1.28989e-06	0	Slc38a4	EndoC	Two-sided Wilcoxon test	0.25	25
2.96795e-12	0.272086	0.811	0.61	6.96993e-08	0	Adam19	EndoC	Two-sided Wilcoxon test	0.25	25
5.51636e-10	0.271541	0.792	0.646	1.29546e-05	0	Tspan9	EndoC	Two-sided Wilcoxon test	0.25	25
2.16331e-16	0.270176	0.624	0.405	5.08031e-12	0	Smagp	EndoC	Two-sided Wilcoxon test	0.25	25
4.03026e-21	0.269112	0.379	0.169	9.46467e-17	0	Ctso	EndoC	Two-sided Wilcoxon test	0.25	25
4.09389e-12	0.267634	0.808	0.666	9.61409e-08	0	Pdcd4	EndoC	Two-sided Wilcoxon test	0.25	25
3.77172e-18	0.267289	0.694	0.434	8.85751e-14	0	Lcp1	EndoC	Two-sided Wilcoxon test	0.25	25
1.07265e-10	0.266989	0.794	0.648	2.51902e-06	0	Fchsd2	EndoC	Two-sided Wilcoxon test	0.25	25
3.82893e-11	0.266905	0.554	0.384	8.99186e-07	0	Ksr1	EndoC	Two-sided Wilcoxon test	0.25	25
6.92506e-17	0.266831	0.685	0.49	1.62628e-12	0	Tspo	EndoC	Two-sided Wilcoxon test	0.25	25
6.06791e-10	0.2638	0.766	0.617	1.42499e-05	0	Dapk1	EndoC	Two-sided Wilcoxon test	0.25	25
3.17766e-12	0.263512	0.731	0.551	7.46241e-08	0	Ccdc80	EndoC	Two-sided Wilcoxon test	0.25	25
5.75128e-09	0.26212	0.687	0.545	0.000135063	0	Atxn7	EndoC	Two-sided Wilcoxon test	0.25	25
1.26665e-10	0.262057	0.696	0.546	2.97459e-06	0	Atp2b4	EndoC	Two-sided Wilcoxon test	0.25	25
1.44338e-08	0.261531	0.537	0.385	0.000338963	0	Samd5	EndoC	Two-sided Wilcoxon test	0.25	25
3.59273e-09	0.261371	0.678	0.546	8.43718e-05	0	Ttc7b	EndoC	Two-sided Wilcoxon test	0.25	25
3.61316e-15	0.260284	0.561	0.363	8.48514e-11	0	Rasgrp2	EndoC	Two-sided Wilcoxon test	0.25	25
4.30223e-06	0.260256	0.577	0.448	0.101034	0	Enox2	EndoC	Two-sided Wilcoxon test	0.25	25
2.57469e-13	0.259142	0.5	0.308	6.04639e-09	0	Dusp2	EndoC	Two-sided Wilcoxon test	0.25	25
3.98342e-18	0.258633	0.907	0.657	9.35466e-14	0	Ltbp1	EndoC	Two-sided Wilcoxon test	0.25	25
7.70587e-18	0.258612	0.414	0.211	1.80965e-13	0	Bst2	EndoC	Two-sided Wilcoxon test	0.25	25
4.30037e-12	0.257547	0.731	0.574	1.0099e-07	0	Sept9	EndoC	Two-sided Wilcoxon test	0.25	25
3.31771e-08	0.257384	0.757	0.611	0.000779132	0	Itsn1	EndoC	Two-sided Wilcoxon test	0.25	25
1.57696e-08	0.255686	0.921	0.803	0.000370334	0	Erbin	EndoC	Two-sided Wilcoxon test	0.25	25
5.57501e-16	0.255149	0.703	0.509	1.30924e-11	0	Blvrb	EndoC	Two-sided Wilcoxon test	0.25	25
1.12107e-08	0.255018	0.668	0.546	0.000263271	0	Txnip	EndoC	Two-sided Wilcoxon test	0.25	25
1.82378e-15	0.254829	0.822	0.675	4.28298e-11	0	Etfb	EndoC	Two-sided Wilcoxon test	0.25	25
1.84201e-08	0.25367	0.64	0.531	0.000432577	0	Hdac8	EndoC	Two-sided Wilcoxon test	0.25	25
9.55894e-10	0.253623	0.647	0.481	2.24482e-05	0	Zdbf2	EndoC	Two-sided Wilcoxon test	0.25	25
1.53432e-23	0.253593	0.376	0.147	3.60321e-19	0	Dsg2	EndoC	Two-sided Wilcoxon test	0.25	25
4.3235e-10	0.253229	0.818	0.675	1.01533e-05	0	Ppp1r9a	EndoC	Two-sided Wilcoxon test	0.25	25
2.3028e-07	0.253008	0.918	0.775	0.00540788	0	Dip2b	EndoC	Two-sided Wilcoxon test	0.25	25
1.04121e-08	0.2526	0.834	0.69	0.000244518	0	Numb	EndoC	Two-sided Wilcoxon test	0.25	25
1.73446e-12	0.252304	0.453	0.284	4.07321e-08	0	Tex2	EndoC	Two-sided Wilcoxon test	0.25	25
2.98007e-13	0.251717	0.713	0.541	6.99839e-09	0	Palm	EndoC	Two-sided Wilcoxon test	0.25	25
1.02688e-18	0.251238	0.783	0.519	2.41153e-14	0	Prickle2	EndoC	Two-sided Wilcoxon test	0.25	25
1.32103e-06	0.251179	0.675	0.55	0.031023	0	Sec24a	EndoC	Two-sided Wilcoxon test	0.25	25
3.372e-13	0.251025	0.846	0.604	7.91881e-09	0	Rasgrp3	EndoC	Two-sided Wilcoxon test	0.25	25
1.46267e-08	0.250646	0.764	0.614	0.000343493	0	Cog5	EndoC	Two-sided Wilcoxon test	0.25	25
2.38542e-10	0.250332	0.867	0.783	5.60192e-06	0	S100a11	EndoC	Two-sided Wilcoxon test	0.25	25
7.42124e-94	2.33408	0.896	0.428	1.7428e-89	1	Vcan	EndoV1	Two-sided Wilcoxon test	0.25	25
2.80139e-97	2.15897	0.823	0.279	6.57879e-93	1	Sox6	EndoV1	Two-sided Wilcoxon test	0.25	25
3.95042e-50	1.98882	0.642	0.278	9.27717e-46	1	Ccdc141	EndoV1	Two-sided Wilcoxon test	0.25	25
4.82346e-93	1.9826	0.893	0.48	1.13274e-88	1	Pdlim3	EndoV1	Two-sided Wilcoxon test	0.25	25
5.97461e-54	1.68289	0.81	0.439	1.40308e-49	1	Ncam1	EndoV1	Two-sided Wilcoxon test	0.25	25
1.59258e-77	1.51533	0.801	0.358	3.74001e-73	1	Tbx20	EndoV1	Two-sided Wilcoxon test	0.25	25
1.0629e-54	1.4839	0.893	0.707	2.49612e-50	1	Hapln1	EndoV1	Two-sided Wilcoxon test	0.25	25
3.00791e-81	1.48014	0.606	0.135	7.06378e-77	1	Thbs1	EndoV1	Two-sided Wilcoxon test	0.25	25
5.98066e-30	1.44211	0.505	0.217	1.4045e-25	1	Nckap5	EndoV1	Two-sided Wilcoxon test	0.25	25
5.42706e-77	1.41958	0.948	0.547	1.27449e-72	1	Limch1	EndoV1	Two-sided Wilcoxon test	0.25	25
6.49137e-30	1.40411	0.884	0.723	1.52443e-25	1	Map1b	EndoV1	Two-sided Wilcoxon test	0.25	25
5.93953e-49	1.35077	0.862	0.564	1.39484e-44	1	Edil3	EndoV1	Two-sided Wilcoxon test	0.25	25
9.46548e-59	1.3485	0.685	0.25	2.22287e-54	1	Cdh13	EndoV1	Two-sided Wilcoxon test	0.25	25
6.1719e-57	1.33933	0.81	0.418	1.44941e-52	1	Pcsk5	EndoV1	Two-sided Wilcoxon test	0.25	25
3.24839e-75	1.32265	0.489	0.071	7.62853e-71	1	Bmper	EndoV1	Two-sided Wilcoxon test	0.25	25
2.19929e-50	1.28476	0.844	0.565	5.16482e-46	1	Ptprb	EndoV1	Two-sided Wilcoxon test	0.25	25
3.6323e-47	1.27992	0.566	0.179	8.53008e-43	1	Hs6st3	EndoV1	Two-sided Wilcoxon test	0.25	25
5.91909e-07	1.16418	0.278	0.161	0.0139004	1	Robo2	EndoV1	Two-sided Wilcoxon test	0.25	25
4.6109e-24	1.14301	0.771	0.617	1.08282e-19	1	Crip1	EndoV1	Two-sided Wilcoxon test	0.25	25
1.32427e-32	1.05802	0.862	0.652	3.10991e-28	1	Meg3	EndoV1	Two-sided Wilcoxon test	0.25	25
2.30837e-26	1.05048	0.908	0.767	5.42098e-22	1	Klf2	EndoV1	Two-sided Wilcoxon test	0.25	25
9.05931e-38	0.991399	0.801	0.518	2.12749e-33	1	Atp13a3	EndoV1	Two-sided Wilcoxon test	0.25	25
1.61534e-36	0.984444	0.853	0.665	3.79346e-32	1	Mical2	EndoV1	Two-sided Wilcoxon test	0.25	25
2.43157e-40	0.975058	0.85	0.611	5.71029e-36	1	Dpysl3	EndoV1	Two-sided Wilcoxon test	0.25	25
6.14721e-43	0.956222	0.847	0.551	1.44361e-38	1	Dennd5b	EndoV1	Two-sided Wilcoxon test	0.25	25
6.3511e-77	0.953093	0.532	0.09	1.49149e-72	1	Has2	EndoV1	Two-sided Wilcoxon test	0.25	25
2.08617e-37	0.944807	0.838	0.507	4.89915e-33	1	2610307P16Rik	EndoV1	Two-sided Wilcoxon test	0.25	25
8.05749e-47	0.936416	0.893	0.686	1.89222e-42	1	Creb3l2	EndoV1	Two-sided Wilcoxon test	0.25	25
3.03696e-33	0.920627	0.948	0.766	7.13199e-29	1	Arl15	EndoV1	Two-sided Wilcoxon test	0.25	25
9.62859e-70	0.920526	0.505	0.09	2.26118e-65	1	Igfbp7	EndoV1	Two-sided Wilcoxon test	0.25	25
1.32206e-28	0.908748	0.557	0.263	3.10473e-24	1	Edn1	EndoV1	Two-sided Wilcoxon test	0.25	25
1.16437e-38	0.908715	0.82	0.607	2.73441e-34	1	Pdlim1	EndoV1	Two-sided Wilcoxon test	0.25	25
3.59849e-24	0.90263	0.361	0.134	8.45069e-20	1	Wnt4	EndoV1	Two-sided Wilcoxon test	0.25	25
8.60138e-42	0.883057	0.835	0.605	2.01995e-37	1	Gata4	EndoV1	Two-sided Wilcoxon test	0.25	25
1.99565e-21	0.881435	0.896	0.682	4.68659e-17	1	Ltbp1	EndoV1	Two-sided Wilcoxon test	0.25	25
3.63154e-43	0.880486	0.413	0.095	8.5283e-39	1	Tnc	EndoV1	Two-sided Wilcoxon test	0.25	25
1.70287e-31	0.877385	0.554	0.249	3.99903e-27	1	Fbln2	EndoV1	Two-sided Wilcoxon test	0.25	25
3.27551e-38	0.865194	0.856	0.583	7.69221e-34	1	Smad6	EndoV1	Two-sided Wilcoxon test	0.25	25
1.78593e-37	0.862263	0.303	0.054	4.19408e-33	1	Grid1	EndoV1	Two-sided Wilcoxon test	0.25	25
3.24184e-05	0.858832	0.394	0.309	0.761313	1	Ccser1	EndoV1	Two-sided Wilcoxon test	0.25	25
1.27558e-36	0.856868	0.789	0.591	2.99557e-32	1	Nfatc1	EndoV1	Two-sided Wilcoxon test	0.25	25
1.65939e-36	0.855914	0.957	0.791	3.89692e-32	1	Fndc3b	EndoV1	Two-sided Wilcoxon test	0.25	25
1.87005e-39	0.843255	0.526	0.194	4.39162e-35	1	Tinagl1	EndoV1	Two-sided Wilcoxon test	0.25	25
6.45386e-22	0.841919	0.792	0.62	1.51562e-17	1	Heg1	EndoV1	Two-sided Wilcoxon test	0.25	25
1.71334e-14	0.838502	0.309	0.139	4.0236e-10	1	2610035D17Rik	EndoV1	Two-sided Wilcoxon test	0.25	25
9.81382e-36	0.838082	0.813	0.541	2.30468e-31	1	Rai14	EndoV1	Two-sided Wilcoxon test	0.25	25
4.57551e-28	0.826325	0.899	0.717	1.07451e-23	1	Creb5	EndoV1	Two-sided Wilcoxon test	0.25	25
2.5688e-43	0.82344	0.349	0.064	6.03257e-39	1	Nts	EndoV1	Two-sided Wilcoxon test	0.25	25
5.47622e-26	0.818075	0.645	0.399	1.28604e-21	1	Klf4	EndoV1	Two-sided Wilcoxon test	0.25	25
2.18942e-18	0.815885	0.859	0.682	5.14164e-14	1	Ldlrad4	EndoV1	Two-sided Wilcoxon test	0.25	25
3.94921e-12	0.810467	0.498	0.319	9.27432e-08	1	Sulf1	EndoV1	Two-sided Wilcoxon test	0.25	25
1.06666e-39	0.809636	0.547	0.222	2.50495e-35	1	Stk38l	EndoV1	Two-sided Wilcoxon test	0.25	25
9.98485e-08	0.807009	0.654	0.512	0.00234484	1	Sox5	EndoV1	Two-sided Wilcoxon test	0.25	25
8.81496e-25	0.803727	0.887	0.71	2.07011e-20	1	Frmd4b	EndoV1	Two-sided Wilcoxon test	0.25	25
1.85703e-14	0.793081	0.731	0.559	4.36105e-10	1	Plxna4	EndoV1	Two-sided Wilcoxon test	0.25	25
5.48865e-13	0.788908	0.349	0.182	1.28896e-08	1	Bmp6	EndoV1	Two-sided Wilcoxon test	0.25	25
4.25031e-13	0.784781	0.664	0.493	9.98143e-09	1	Atf3	EndoV1	Two-sided Wilcoxon test	0.25	25
3.33163e-35	0.782851	0.743	0.423	7.82399e-31	1	Stxbp6	EndoV1	Two-sided Wilcoxon test	0.25	25
4.24906e-14	0.778832	0.566	0.345	9.9785e-10	1	Hspb1	EndoV1	Two-sided Wilcoxon test	0.25	25
1.67387e-29	0.777866	1	0.996	3.93093e-25	1	Malat1	EndoV1	Two-sided Wilcoxon test	0.25	25
6.24781e-40	0.77162	0.63	0.306	1.46724e-35	1	Ptgis	EndoV1	Two-sided Wilcoxon test	0.25	25
2.8492e-34	0.769916	0.596	0.309	6.69105e-30	1	Ltbp4	EndoV1	Two-sided Wilcoxon test	0.25	25
1.20904e-20	0.758789	0.688	0.434	2.8393e-16	1	Atxn1	EndoV1	Two-sided Wilcoxon test	0.25	25
9.68122e-30	0.75463	0.502	0.214	2.27354e-25	1	Pknox2	EndoV1	Two-sided Wilcoxon test	0.25	25
5.10649e-44	0.748907	0.349	0.062	1.19921e-39	1	Aqp1	EndoV1	Two-sided Wilcoxon test	0.25	25
[truncated: 2,444 more rows]
