# Supplementary material for: Endothelial RNF20 suppresses endothelial-to-mesenchymal transition and safeguards physiological angiocrine signaling to prevent congenital heart disease
Source: Nat Commun. 2025 Oct 27;16:9480. doi: 10.1038/s41467-025-65291-0 (PMC12559710; doi:10.1038/s41467-025-65291-0)
Supplement: Supplementary file 7 — Supplementary Data 4 [file 41467_2025_65291_MOESM7_ESM.xlsx]

## Sheet: EC-EndoC
Supplementary Data 4. DEG in single cell datasets of Rnf20iEC-KO versus control embryos.
gene	p_val	avg_log2FC	pct.1	pct.2	p_val_adj	Test_used	fc.threshold (log2)	min.pct (%)
Xist	1.67534e-68	2.74839	0.63	0.003	3.93437e-64	Two-sided Wilcoxon test	0.25	5
Rps15a	8.91615e-68	0.812599	0.995	0.977	2.09387e-63	Two-sided Wilcoxon test	0.25	5
Rpl41	1.01935e-62	0.712093	0.996	0.987	2.39385e-58	Two-sided Wilcoxon test	0.25	5
Rplp1	1.90571e-60	0.720234	0.991	0.98	4.47537e-56	Two-sided Wilcoxon test	0.25	5
Rpl30	6.00898e-57	0.677408	0.988	0.957	1.41115e-52	Two-sided Wilcoxon test	0.25	5
Rpl27	1.92586e-52	0.621966	0.988	0.974	4.52268e-48	Two-sided Wilcoxon test	0.25	5
Hba-a1	1.22291e-50	1.62113	0.997	0.891	2.87187e-46	Two-sided Wilcoxon test	0.25	5
Rpl35a	5.18583e-49	0.680282	0.964	0.894	1.21784e-44	Two-sided Wilcoxon test	0.25	5
Uty	1.52255e-48	-0.864947	0.36	0.858	3.57556e-44	Two-sided Wilcoxon test	0.25	5
Snrpe	9.51833e-48	0.722368	0.913	0.821	2.23528e-43	Two-sided Wilcoxon test	0.25	5
Rplp2	4.42709e-46	0.625054	0.959	0.897	1.03966e-41	Two-sided Wilcoxon test	0.25	5
Hba-a2	3.09106e-45	1.43621	0.972	0.705	7.25905e-41	Two-sided Wilcoxon test	0.25	5
Snrpg	5.63673e-44	0.656129	0.937	0.851	1.32373e-39	Two-sided Wilcoxon test	0.25	5
Rps12	2.67513e-43	0.594595	0.996	0.98	6.28227e-39	Two-sided Wilcoxon test	0.25	5
Rpl34	3.67852e-42	0.611313	0.973	0.934	8.63863e-38	Two-sided Wilcoxon test	0.25	5
Rps21	2.07046e-39	0.54046	0.976	0.937	4.86228e-35	Two-sided Wilcoxon test	0.25	5
Rpl32	2.24e-38	0.554075	0.987	0.967	5.26042e-34	Two-sided Wilcoxon test	0.25	5
Hba-x	1.4707e-37	1.18042	0.999	1	3.4538e-33	Two-sided Wilcoxon test	0.25	5
Ndufa4	4.33071e-37	0.605505	0.925	0.864	1.01702e-32	Two-sided Wilcoxon test	0.25	5
Gng5	6.47105e-37	0.586084	0.947	0.874	1.51966e-32	Two-sided Wilcoxon test	0.25	5
Cox6b1	9.35361e-37	0.592471	0.927	0.871	2.1966e-32	Two-sided Wilcoxon test	0.25	5
Rps26	2.36861e-36	0.54112	0.984	0.97	5.56245e-32	Two-sided Wilcoxon test	0.25	5
Rps14	3.1339e-36	0.456538	0.993	0.997	7.35965e-32	Two-sided Wilcoxon test	0.25	5
Sec61g	9.9898e-36	0.618439	0.915	0.861	2.34601e-31	Two-sided Wilcoxon test	0.25	5
Rps17	8.59892e-35	0.518938	0.971	0.917	2.01937e-30	Two-sided Wilcoxon test	0.25	5
Rps25	1.79539e-34	0.520425	0.961	0.95	4.2163e-30	Two-sided Wilcoxon test	0.25	5
Ddx3y	4.24805e-34	-0.541975	0.328	0.725	9.97612e-30	Two-sided Wilcoxon test	0.25	5
Hbb-y	5.25805e-34	1.14036	0.999	1	1.2348e-29	Two-sided Wilcoxon test	0.25	5
Rps11	6.885e-34	0.485349	0.985	0.983	1.61687e-29	Two-sided Wilcoxon test	0.25	5
Rps20	7.83145e-34	0.453953	0.993	0.987	1.83914e-29	Two-sided Wilcoxon test	0.25	5
Rps15	3.52407e-33	0.487551	0.975	0.957	8.27592e-29	Two-sided Wilcoxon test	0.25	5
Rpl31	8.63857e-33	0.547596	0.929	0.884	2.02868e-28	Two-sided Wilcoxon test	0.25	5
Rps19	2.71498e-32	0.474828	0.98	0.977	6.37585e-28	Two-sided Wilcoxon test	0.25	5
Atp5e	1.30126e-31	0.579407	0.867	0.758	3.05587e-27	Two-sided Wilcoxon test	0.25	5
Rpl36a	1.3598e-31	0.513859	0.949	0.904	3.19336e-27	Two-sided Wilcoxon test	0.25	5
Fau	2.99495e-31	0.467961	0.987	0.967	7.03334e-27	Two-sided Wilcoxon test	0.25	5
Rpl21	5.93708e-31	0.484097	0.975	0.921	1.39426e-26	Two-sided Wilcoxon test	0.25	5
Atp5l	6.31214e-31	0.563126	0.905	0.815	1.48234e-26	Two-sided Wilcoxon test	0.25	5
Elob	1.33021e-30	0.564283	0.919	0.831	3.12386e-26	Two-sided Wilcoxon test	0.25	5
Cox7a2	3.7279e-30	0.526802	0.913	0.825	8.75461e-26	Two-sided Wilcoxon test	0.25	5
Hbb-bt	8.46129e-30	0.936096	0.718	0.341	1.98705e-25	Two-sided Wilcoxon test	0.25	5
Cox6c	2.24687e-29	0.530398	0.92	0.854	5.27656e-25	Two-sided Wilcoxon test	0.25	5
Rpl36al	1.3878e-28	0.559072	0.901	0.821	3.2591e-24	Two-sided Wilcoxon test	0.25	5
Rpl36	1.80269e-28	0.514202	0.935	0.861	4.23344e-24	Two-sided Wilcoxon test	0.25	5
Rps23	1.94392e-28	0.468911	0.983	0.934	4.5651e-24	Two-sided Wilcoxon test	0.25	5
Sem1	2.30356e-28	0.495586	0.899	0.831	5.40968e-24	Two-sided Wilcoxon test	0.25	5
Cmss1	3.64444e-28	-0.741374	0.987	0.993	8.55861e-24	Two-sided Wilcoxon test	0.25	5
Rps16	8.9661e-28	0.418382	0.996	0.977	2.1056e-23	Two-sided Wilcoxon test	0.25	5
Rpl37a	1.02928e-27	0.447304	0.975	0.964	2.41717e-23	Two-sided Wilcoxon test	0.25	5
Atpif1	1.16457e-27	0.536724	0.919	0.884	2.73487e-23	Two-sided Wilcoxon test	0.25	5
Eif2s3y	1.16684e-27	-0.40782	0.264	0.619	2.7402e-23	Two-sided Wilcoxon test	0.25	5
Rpl26	1.31783e-27	0.427301	0.989	0.957	3.0948e-23	Two-sided Wilcoxon test	0.25	5
Serf2	3.30876e-27	0.506623	0.943	0.917	7.77029e-23	Two-sided Wilcoxon test	0.25	5
Rpl39	8.36676e-27	0.463876	0.968	0.96	1.96485e-22	Two-sided Wilcoxon test	0.25	5
Rpl27a	1.15676e-26	0.384691	0.989	0.993	2.71653e-22	Two-sided Wilcoxon test	0.25	5
Snrpd2	8.40375e-26	0.48408	0.897	0.808	1.97354e-21	Two-sided Wilcoxon test	0.25	5
Rpl22	9.68376e-26	0.435552	0.967	0.914	2.27413e-21	Two-sided Wilcoxon test	0.25	5
Rpl28	2.30758e-25	0.414279	0.995	0.977	5.41912e-21	Two-sided Wilcoxon test	0.25	5
Rps13	5.09073e-25	0.411778	0.972	0.97	1.19551e-20	Two-sided Wilcoxon test	0.25	5
Ndufa2	5.51934e-25	0.540322	0.844	0.732	1.29616e-20	Two-sided Wilcoxon test	0.25	5
Ubl5	9.20016e-25	0.514374	0.838	0.719	2.16057e-20	Two-sided Wilcoxon test	0.25	5
Rps24	2.09446e-24	0.389363	0.991	0.97	4.91862e-20	Two-sided Wilcoxon test	0.25	5
Cox8a	3.90505e-24	0.464402	0.933	0.864	9.17062e-20	Two-sided Wilcoxon test	0.25	5
Il1rapl1	4.41301e-23	-0.420069	0.264	0.57	1.03635e-18	Two-sided Wilcoxon test	0.25	5
Rps27a	1.14729e-22	0.398375	0.989	0.983	2.69429e-18	Two-sided Wilcoxon test	0.25	5
Rpl37	3.57193e-22	0.384419	0.961	0.927	8.38832e-18	Two-sided Wilcoxon test	0.25	5
Tmem258	3.74797e-22	0.521218	0.834	0.732	8.80174e-18	Two-sided Wilcoxon test	0.25	5
Rps29	1.47263e-21	0.393339	0.96	0.957	3.45833e-17	Two-sided Wilcoxon test	0.25	5
Rpl23	1.50298e-21	0.360267	0.997	0.987	3.52959e-17	Two-sided Wilcoxon test	0.25	5
Rps8	1.64027e-21	0.335509	0.997	0.987	3.852e-17	Two-sided Wilcoxon test	0.25	5
Kdm5d	2.14086e-21	-0.275554	0.166	0.45	5.02759e-17	Two-sided Wilcoxon test	0.25	5
Rbx1	2.52857e-21	0.425718	0.892	0.841	5.93809e-17	Two-sided Wilcoxon test	0.25	5
Nop10	6.1999e-21	0.477411	0.848	0.745	1.45598e-16	Two-sided Wilcoxon test	0.25	5
Rps27l	8.00718e-21	0.518427	0.86	0.775	1.88041e-16	Two-sided Wilcoxon test	0.25	5
Atp5j2	2.42951e-20	0.432358	0.901	0.854	5.70546e-16	Two-sided Wilcoxon test	0.25	5
Ndufa7	5.41044e-20	0.460913	0.859	0.758	1.27059e-15	Two-sided Wilcoxon test	0.25	5
Atp5mpl	7.86334e-20	0.451254	0.827	0.702	1.84663e-15	Two-sided Wilcoxon test	0.25	5
Hbb-bh1	8.90732e-20	0.773601	0.969	0.891	2.09179e-15	Two-sided Wilcoxon test	0.25	5
Sec61b	1.15576e-19	0.475015	0.88	0.811	2.71418e-15	Two-sided Wilcoxon test	0.25	5
Snrpd1	1.33787e-19	0.458556	0.915	0.851	3.14186e-15	Two-sided Wilcoxon test	0.25	5
Cox7b	2.994e-19	0.450418	0.891	0.828	7.03112e-15	Two-sided Wilcoxon test	0.25	5
Hint1	2.11367e-18	0.422077	0.924	0.844	4.96375e-14	Two-sided Wilcoxon test	0.25	5
Hspe1	2.37337e-18	0.461527	0.889	0.818	5.57362e-14	Two-sided Wilcoxon test	0.25	5
Uqcrb	2.90295e-17	0.407941	0.86	0.785	6.81728e-13	Two-sided Wilcoxon test	0.25	5
Rps18	3.33294e-17	0.351234	0.977	0.96	7.82708e-13	Two-sided Wilcoxon test	0.25	5
Uqcr11	1.68123e-16	0.386617	0.792	0.672	3.94819e-12	Two-sided Wilcoxon test	0.25	5
Pfdn5	1.99822e-16	0.378276	0.895	0.828	4.69263e-12	Two-sided Wilcoxon test	0.25	5
Erh	4.82681e-16	-0.384454	0.86	0.894	1.13353e-11	Two-sided Wilcoxon test	0.25	5
Krtcap2	1.21988e-15	0.435561	0.87	0.811	2.86476e-11	Two-sided Wilcoxon test	0.25	5
Cox5b	1.46013e-15	0.42533	0.862	0.738	3.42897e-11	Two-sided Wilcoxon test	0.25	5
Ndufc1	4.04511e-15	0.424196	0.814	0.692	9.49954e-11	Two-sided Wilcoxon test	0.25	5
Rps10	6.06951e-15	0.307984	0.984	0.97	1.42536e-10	Two-sided Wilcoxon test	0.25	5
Micos10	1.1085e-14	0.381214	0.87	0.831	2.60319e-10	Two-sided Wilcoxon test	0.25	5
Uqcrq	1.48965e-14	0.378896	0.811	0.738	3.4983e-10	Two-sided Wilcoxon test	0.25	5
Rpl10	1.90637e-14	-0.296593	0.936	0.957	4.47692e-10	Two-sided Wilcoxon test	0.25	5
Mt1	2.3893e-14	0.585786	0.503	0.252	5.61104e-10	Two-sided Wilcoxon test	0.25	5
Gm2000	2.58796e-14	0.271634	0.518	0.291	6.07756e-10	Two-sided Wilcoxon test	0.25	5
Ndufa13	2.61665e-14	0.378464	0.831	0.732	6.14494e-10	Two-sided Wilcoxon test	0.25	5
Ndufa5	2.81459e-14	0.424949	0.787	0.699	6.60979e-10	Two-sided Wilcoxon test	0.25	5
Rpl23a	3.72246e-14	0.355335	0.953	0.901	8.74181e-10	Two-sided Wilcoxon test	0.25	5
Romo1	4.5914e-14	0.369651	0.814	0.719	1.07824e-09	Two-sided Wilcoxon test	0.25	5
Cox7c	9.37303e-14	0.332167	0.913	0.891	2.20116e-09	Two-sided Wilcoxon test	0.25	5
Atox1	1.02271e-13	0.369496	0.804	0.709	2.40173e-09	Two-sided Wilcoxon test	0.25	5
Tsix	1.11446e-13	0.278193	0.162	0	2.61719e-09	Two-sided Wilcoxon test	0.25	5
Uqcc2	1.48629e-13	0.358751	0.796	0.695	3.4904e-09	Two-sided Wilcoxon test	0.25	5
Gm19951	3.14361e-13	-0.189579	0.071	0.232	7.38245e-09	Two-sided Wilcoxon test	0.25	5
Uqcr10	3.75667e-13	0.38855	0.843	0.755	8.82216e-09	Two-sided Wilcoxon test	0.25	5
Igf2	4.03967e-13	-0.499345	0.939	0.977	9.48676e-09	Two-sided Wilcoxon test	0.25	5
Atp5h	4.88639e-13	0.306536	0.909	0.864	1.14752e-08	Two-sided Wilcoxon test	0.25	5
Tbca	5.01074e-13	0.349191	0.888	0.851	1.17672e-08	Two-sided Wilcoxon test	0.25	5
Rpl11	1.31537e-12	0.25802	0.989	0.974	3.08901e-08	Two-sided Wilcoxon test	0.25	5
Lsm7	1.511e-12	0.357056	0.74	0.616	3.54844e-08	Two-sided Wilcoxon test	0.25	5
Snrpf	1.90885e-12	0.373524	0.819	0.732	4.48275e-08	Two-sided Wilcoxon test	0.25	5
Uqcrh	2.10309e-12	0.320625	0.911	0.871	4.93891e-08	Two-sided Wilcoxon test	0.25	5
Mrps21	2.88568e-12	0.344251	0.766	0.672	6.77673e-08	Two-sided Wilcoxon test	0.25	5
Mrps18c	4.06906e-12	0.317285	0.703	0.546	9.55579e-08	Two-sided Wilcoxon test	0.25	5
Tomm7	4.48547e-12	0.354413	0.812	0.738	1.05337e-07	Two-sided Wilcoxon test	0.25	5
Timm8b	5.57947e-12	0.334068	0.735	0.616	1.31028e-07	Two-sided Wilcoxon test	0.25	5
Gm48099	8.50388e-12	-0.159495	0.109	0.281	1.99705e-07	Two-sided Wilcoxon test	0.25	5
Cops9	1.08742e-11	0.334594	0.804	0.702	2.5537e-07	Two-sided Wilcoxon test	0.25	5
Marcksl1	1.09484e-11	0.340828	0.877	0.831	2.57113e-07	Two-sided Wilcoxon test	0.25	5
Ndufa11	1.1479e-11	0.303801	0.772	0.659	2.69574e-07	Two-sided Wilcoxon test	0.25	5
Arpp19	1.57235e-11	0.329517	0.835	0.762	3.69251e-07	Two-sided Wilcoxon test	0.25	5
Dynll1	2.22104e-11	0.361881	0.955	0.937	5.21588e-07	Two-sided Wilcoxon test	0.25	5
Dbi	3.27366e-11	0.34472	0.868	0.801	7.68787e-07	Two-sided Wilcoxon test	0.25	5
Ndufs6	4.30141e-11	0.325527	0.76	0.695	1.01014e-06	Two-sided Wilcoxon test	0.25	5
Rsrp1	6.02659e-11	-0.302725	0.76	0.858	1.41528e-06	Two-sided Wilcoxon test	0.25	5
Atp5md	7.58205e-11	0.318557	0.824	0.742	1.78057e-06	Two-sided Wilcoxon test	0.25	5
Lsm6	1.10072e-10	0.342493	0.8	0.725	2.58494e-06	Two-sided Wilcoxon test	0.25	5
Slirp	1.45359e-10	0.254341	0.676	0.54	3.4136e-06	Two-sided Wilcoxon test	0.25	5
Ndufa12	1.91201e-10	0.323873	0.836	0.788	4.49015e-06	Two-sided Wilcoxon test	0.25	5
Rpl24	2.97915e-10	0.249195	0.972	0.957	6.99623e-06	Two-sided Wilcoxon test	0.25	5
Hnrnpab	3.0199e-10	0.332243	0.883	0.858	7.09193e-06	Two-sided Wilcoxon test	0.25	5
Rps27	4.35991e-10	0.261284	0.951	0.93	1.02388e-05	Two-sided Wilcoxon test	0.25	5
Gm42418	4.80767e-10	-0.581309	1	1	1.12903e-05	Two-sided Wilcoxon test	0.25	5
Tmem256	5.98447e-10	0.328485	0.755	0.669	1.40539e-05	Two-sided Wilcoxon test	0.25	5
Uba52	6.41626e-10	0.275103	0.866	0.801	1.50679e-05	Two-sided Wilcoxon test	0.25	5
Mif	8.11841e-10	0.325245	0.96	0.93	1.90653e-05	Two-sided Wilcoxon test	0.25	5
Dpm3	9.66546e-10	0.306574	0.646	0.53	2.26984e-05	Two-sided Wilcoxon test	0.25	5
Gm1673	1.00115e-09	0.386858	0.702	0.589	2.35109e-05	Two-sided Wilcoxon test	0.25	5
Myl6	1.1088e-09	0.309301	0.948	0.924	2.60391e-05	Two-sided Wilcoxon test	0.25	5
Ndufs5	1.24783e-09	0.310916	0.77	0.722	2.9304e-05	Two-sided Wilcoxon test	0.25	5
Rpl14	1.27926e-09	0.231245	0.972	0.957	3.00422e-05	Two-sided Wilcoxon test	0.25	5
Rpl22l1	1.28496e-09	0.309015	0.897	0.834	3.0176e-05	Two-sided Wilcoxon test	0.25	5
Snrpd3	1.29638e-09	0.322933	0.842	0.762	3.04441e-05	Two-sided Wilcoxon test	0.25	5
Atp5j	1.99497e-09	0.290049	0.88	0.831	4.68498e-05	Two-sided Wilcoxon test	0.25	5
Actb	2.0217e-09	0.30473	0.995	0.99	4.74777e-05	Two-sided Wilcoxon test	0.25	5
Atp5g1	2.22847e-09	0.310658	0.883	0.854	5.23333e-05	Two-sided Wilcoxon test	0.25	5
Ndufb7	2.77073e-09	0.286022	0.803	0.735	6.50678e-05	Two-sided Wilcoxon test	0.25	5
Col4a1	2.93375e-09	-0.342723	0.953	0.96	6.88963e-05	Two-sided Wilcoxon test	0.25	5
Mrpl52	4.47363e-09	0.278925	0.726	0.626	0.000105059	Two-sided Wilcoxon test	0.25	5
Naa38	8.07596e-09	0.272319	0.625	0.47	0.000189656	Two-sided Wilcoxon test	0.25	5
Camk1d	8.10053e-09	-0.513368	0.85	0.94	0.000190233	Two-sided Wilcoxon test	0.25	5
Anapc13	8.3506e-09	0.257463	0.567	0.454	0.000196105	Two-sided Wilcoxon test	0.25	5
Glg1	9.32846e-09	-0.300717	0.847	0.924	0.00021907	Two-sided Wilcoxon test	0.25	5
Psmb3	1.18138e-08	0.271329	0.868	0.831	0.000277436	Two-sided Wilcoxon test	0.25	5
Emilin1	1.20294e-08	-0.23306	0.712	0.828	0.000282499	Two-sided Wilcoxon test	0.25	5
Set	1.22955e-08	0.24309	0.933	0.93	0.000288748	Two-sided Wilcoxon test	0.25	5
Jun	1.25959e-08	0.397718	0.884	0.821	0.000295803	Two-sided Wilcoxon test	0.25	5
Ndufb2	2.13462e-08	0.295657	0.74	0.672	0.000501294	Two-sided Wilcoxon test	0.25	5
Ndufa6	2.91709e-08	0.311809	0.803	0.728	0.000685049	Two-sided Wilcoxon test	0.25	5
Lysmd4	3.02522e-08	-0.412189	0.264	0.437	0.000710442	Two-sided Wilcoxon test	0.25	5
Ptges3	3.48453e-08	0.277633	0.883	0.861	0.000818306	Two-sided Wilcoxon test	0.25	5
Nasp	4.16408e-08	0.285479	0.897	0.874	0.000977893	Two-sided Wilcoxon test	0.25	5
Eif4b	5.3433e-08	-0.269476	0.759	0.848	0.00125482	Two-sided Wilcoxon test	0.25	5
Tubb5	5.74173e-08	0.277064	0.981	0.964	0.00134839	Two-sided Wilcoxon test	0.25	5
Nme1	6.03598e-08	0.30008	0.888	0.805	0.00141749	Two-sided Wilcoxon test	0.25	5
Tuba1b	6.33584e-08	0.322185	0.824	0.745	0.00148791	Two-sided Wilcoxon test	0.25	5
Atp5k	6.39825e-08	0.27235	0.795	0.728	0.00150256	Two-sided Wilcoxon test	0.25	5
Mrpl20	7.10657e-08	0.29182	0.803	0.719	0.00166891	Two-sided Wilcoxon test	0.25	5
Lsm5	8.45339e-08	0.299691	0.724	0.656	0.00198519	Two-sided Wilcoxon test	0.25	5
mt-Nd2	9.84218e-08	-0.420756	0.991	1	0.00231134	Two-sided Wilcoxon test	0.25	5
Gnas	1.03804e-07	-0.28865	0.953	0.974	0.00243773	Two-sided Wilcoxon test	0.25	5
Ttn	1.26149e-07	-0.634199	0.354	0.52	0.00296247	Two-sided Wilcoxon test	0.25	5
Polr2f	1.34163e-07	0.239669	0.758	0.669	0.00315069	Two-sided Wilcoxon test	0.25	5
Bola1	1.46192e-07	0.188659	0.449	0.298	0.00343318	Two-sided Wilcoxon test	0.25	5
mt-Nd3	1.77574e-07	0.332732	0.988	0.987	0.00417015	Two-sided Wilcoxon test	0.25	5
Hypk	1.80517e-07	0.223112	0.638	0.553	0.00423925	Two-sided Wilcoxon test	0.25	5
Gstp1	1.88753e-07	-0.165821	0.356	0.52	0.00443268	Two-sided Wilcoxon test	0.25	5
Hbb-bs	1.93348e-07	0.236617	0.244	0.103	0.00454059	Two-sided Wilcoxon test	0.25	5
Tra2a	2.15476e-07	-0.359003	0.831	0.891	0.00506024	Two-sided Wilcoxon test	0.25	5
Nedd8	2.31934e-07	0.24274	0.887	0.834	0.00544675	Two-sided Wilcoxon test	0.25	5
Cox5a	2.53985e-07	0.236494	0.897	0.874	0.00596458	Two-sided Wilcoxon test	0.25	5
Gas5	2.66902e-07	0.252729	0.903	0.861	0.00626794	Two-sided Wilcoxon test	0.25	5
Tmem59	2.70268e-07	-0.247359	0.807	0.854	0.00634697	Two-sided Wilcoxon test	0.25	5
Ccng2	3.43103e-07	-0.212322	0.298	0.467	0.00805744	Two-sided Wilcoxon test	0.25	5
Gm11146	3.45956e-07	-0.154702	0.048	0.139	0.00812444	Two-sided Wilcoxon test	0.25	5
5330438D12Rik	3.48904e-07	-0.393655	0.599	0.755	0.00819367	Two-sided Wilcoxon test	0.25	5
Rwdd1	3.79922e-07	0.257687	0.81	0.728	0.00892208	Two-sided Wilcoxon test	0.25	5
Tmsb10	4.09963e-07	0.260512	0.98	0.957	0.00962758	Two-sided Wilcoxon test	0.25	5
Rpl12	4.1661e-07	0.204892	0.988	0.98	0.00978367	Two-sided Wilcoxon test	0.25	5
Mgst1	4.5661e-07	-0.204129	0.302	0.464	0.010723	Two-sided Wilcoxon test	0.25	5
Zfp608	4.93717e-07	-0.343128	0.866	0.897	0.0115944	Two-sided Wilcoxon test	0.25	5
Hsbp1	5.37305e-07	0.260553	0.811	0.762	0.0126181	Two-sided Wilcoxon test	0.25	5
Mrpl34	5.77466e-07	0.251392	0.802	0.725	0.0135612	Two-sided Wilcoxon test	0.25	5
Pecam1	6.05567e-07	-0.207087	0.927	0.93	0.0142211	Two-sided Wilcoxon test	0.25	5
Rasal2	6.63783e-07	-0.341292	0.864	0.911	0.0155883	Two-sided Wilcoxon test	0.25	5
Gm26749	6.7781e-07	-0.23833	0.096	0.209	0.0159177	Two-sided Wilcoxon test	0.25	5
Crip1	7.02842e-07	0.340253	0.714	0.619	0.0165055	Two-sided Wilcoxon test	0.25	5
Arhgef28	7.04112e-07	-0.263442	0.266	0.421	0.0165354	Two-sided Wilcoxon test	0.25	5
Micos13	7.13329e-07	0.270016	0.767	0.702	0.0167518	Two-sided Wilcoxon test	0.25	5
Gm15614	7.23485e-07	-0.314692	0.402	0.57	0.0169903	Two-sided Wilcoxon test	0.25	5
Pdcd5	8.12502e-07	0.243301	0.854	0.791	0.0190808	Two-sided Wilcoxon test	0.25	5
H2afj	8.69473e-07	0.221605	0.684	0.579	0.0204187	Two-sided Wilcoxon test	0.25	5
Ndufv3	1.02548e-06	0.234339	0.654	0.54	0.0240825	Two-sided Wilcoxon test	0.25	5
Nap1l1	1.1647e-06	0.247508	0.897	0.881	0.0273518	Two-sided Wilcoxon test	0.25	5
Nrp1	1.17302e-06	-0.365415	0.909	0.937	0.0275473	Two-sided Wilcoxon test	0.25	5
Gm20416	1.1846e-06	-0.128677	0.037	0.116	0.027819	Two-sided Wilcoxon test	0.25	5
Kmt2e	1.19829e-06	-0.251685	0.79	0.851	0.0281407	Two-sided Wilcoxon test	0.25	5
Sox18	1.22834e-06	-0.0907365	0.141	0.268	0.0288463	Two-sided Wilcoxon test	0.25	5
Rpl17	1.37546e-06	0.183143	0.984	0.993	0.0323012	Two-sided Wilcoxon test	0.25	5
Aplp2	1.84902e-06	-0.292876	0.933	0.95	0.0434223	Two-sided Wilcoxon test	0.25	5
Polr2i	1.87139e-06	0.251046	0.594	0.5	0.0439478	Two-sided Wilcoxon test	0.25	5
Ndufaf8	1.90545e-06	0.189856	0.457	0.348	0.0447476	Two-sided Wilcoxon test	0.25	5
Cycs	2.17175e-06	0.269987	0.778	0.712	0.0510014	Two-sided Wilcoxon test	0.25	5
Yipf3	2.33572e-06	-0.180735	0.405	0.553	0.0548521	Two-sided Wilcoxon test	0.25	5
Pdgfb	2.35388e-06	-0.101252	0.105	0.219	0.0552785	Two-sided Wilcoxon test	0.25	5
Smdt1	2.37199e-06	0.242972	0.838	0.768	0.0557038	Two-sided Wilcoxon test	0.25	5
Klf6	2.4448e-06	0.377768	0.794	0.715	0.0574137	Two-sided Wilcoxon test	0.25	5
Insyn2a	2.45034e-06	-0.159921	0.16	0.291	0.0575437	Two-sided Wilcoxon test	0.25	5
Rpl18a	2.68967e-06	0.183285	0.993	0.987	0.0631643	Two-sided Wilcoxon test	0.25	5
Prickle3	2.69234e-06	-0.0542715	0.057	0.146	0.0632269	Two-sided Wilcoxon test	0.25	5
Rps27rt	2.89742e-06	0.1417	0.241	0.119	0.0680431	Two-sided Wilcoxon test	0.25	5
Loxl2	3.00258e-06	-0.23297	0.451	0.596	0.0705126	Two-sided Wilcoxon test	0.25	5
Gm46367	3.31052e-06	-0.351119	0.312	0.454	0.0777444	Two-sided Wilcoxon test	0.25	5
Tomm6	3.4189e-06	0.240835	0.788	0.702	0.0802895	Two-sided Wilcoxon test	0.25	5
Hnrnpm	3.52153e-06	0.192625	0.928	0.911	0.0826996	Two-sided Wilcoxon test	0.25	5
P3h3	3.60699e-06	-0.121727	0.216	0.354	0.0847065	Two-sided Wilcoxon test	0.25	5
Higd1a	3.65683e-06	0.20614	0.712	0.646	0.0858771	Two-sided Wilcoxon test	0.25	5
Ppp1ca	3.95334e-06	0.237748	0.867	0.791	0.0928402	Two-sided Wilcoxon test	0.25	5
Pcnx	3.96404e-06	-0.276567	0.69	0.818	0.0930915	Two-sided Wilcoxon test	0.25	5
Timm10b	4.11692e-06	0.240846	0.716	0.632	0.0966816	Two-sided Wilcoxon test	0.25	5
Mir99ahg	4.22909e-06	-0.349785	0.976	0.98	0.0993159	Two-sided Wilcoxon test	0.25	5
Rbm39	4.37212e-06	-0.234392	0.969	0.987	0.102675	Two-sided Wilcoxon test	0.25	5
Abcb7	5.14137e-06	-0.208876	0.466	0.596	0.12074	Two-sided Wilcoxon test	0.25	5
Mfng	5.23556e-06	-0.107892	0.132	0.248	0.122952	Two-sided Wilcoxon test	0.25	5
Gm37768	5.37335e-06	-0.115043	0.138	0.258	0.126188	Two-sided Wilcoxon test	0.25	5
Mib1	5.53498e-06	-0.311306	0.788	0.877	0.129984	Two-sided Wilcoxon test	0.25	5
Tspan18	5.88717e-06	-0.25683	0.895	0.934	0.138254	Two-sided Wilcoxon test	0.25	5
Gm35188	5.94486e-06	-0.244112	0.2	0.338	0.139609	Two-sided Wilcoxon test	0.25	5
Taf10	5.99015e-06	0.253312	0.794	0.732	0.140673	Two-sided Wilcoxon test	0.25	5
Polr2k	6.26885e-06	0.206656	0.639	0.576	0.147218	Two-sided Wilcoxon test	0.25	5
Ppp1r14b	6.43651e-06	0.231389	0.908	0.897	0.151155	Two-sided Wilcoxon test	0.25	5
Gpc6	6.90269e-06	0.402398	0.579	0.444	0.162103	Two-sided Wilcoxon test	0.25	5
Slc6a6	7.21074e-06	-0.239568	0.431	0.573	0.169337	Two-sided Wilcoxon test	0.25	5
Denr	7.40172e-06	0.222847	0.72	0.682	0.173822	Two-sided Wilcoxon test	0.25	5
Dctpp1	7.45281e-06	0.235585	0.732	0.679	0.175022	Two-sided Wilcoxon test	0.25	5
Zfyve19	7.63575e-06	-0.0680476	0.115	0.225	0.179318	Two-sided Wilcoxon test	0.25	5
Pced1b	7.90614e-06	-0.255997	0.328	0.47	0.185668	Two-sided Wilcoxon test	0.25	5
Sec23a	8.10114e-06	-0.231298	0.609	0.735	0.190247	Two-sided Wilcoxon test	0.25	5
Leng1	8.38649e-06	-0.0995327	0.146	0.265	0.196948	Two-sided Wilcoxon test	0.25	5
Rps3	8.84474e-06	-0.181358	0.972	0.977	0.20771	Two-sided Wilcoxon test	0.25	5
Pdap1	9.01387e-06	0.233277	0.855	0.801	0.211682	Two-sided Wilcoxon test	0.25	5
Emp1	9.0514e-06	-0.168426	0.262	0.404	0.212563	Two-sided Wilcoxon test	0.25	5
Snrpb	9.44038e-06	0.197894	0.889	0.861	0.221698	Two-sided Wilcoxon test	0.25	5
Nod1	9.49831e-06	-0.0659431	0.043	0.116	0.223058	Two-sided Wilcoxon test	0.25	5
H2afz	9.65776e-06	0.242721	0.977	0.977	0.226803	Two-sided Wilcoxon test	0.25	5
Platr16	1.00222e-05	-0.059973	0.02	0.076	0.235362	Two-sided Wilcoxon test	0.25	5
Tnks	1.00423e-05	-0.259881	0.889	0.937	0.235834	Two-sided Wilcoxon test	0.25	5
Eif2s3x	1.00516e-05	0.235756	0.683	0.609	0.236051	Two-sided Wilcoxon test	0.25	5
Mrpl33	1.0107e-05	0.194598	0.585	0.49	0.237353	Two-sided Wilcoxon test	0.25	5
Ndufb4	1.06822e-05	0.22803	0.71	0.642	0.25086	Two-sided Wilcoxon test	0.25	5
Fth1	1.08685e-05	0.225066	0.993	0.983	0.255236	Two-sided Wilcoxon test	0.25	5
Eif2s2	1.08933e-05	0.219007	0.901	0.891	0.255818	Two-sided Wilcoxon test	0.25	5
Ndufb8	1.12376e-05	0.237914	0.868	0.805	0.263903	Two-sided Wilcoxon test	0.25	5
Rtl8a	1.12944e-05	-0.0761554	0.201	0.344	0.265238	Two-sided Wilcoxon test	0.25	5
Ddx3x	1.13835e-05	0.20629	0.863	0.818	0.26733	Two-sided Wilcoxon test	0.25	5
Erbin	1.17485e-05	-0.297812	0.899	0.94	0.275901	Two-sided Wilcoxon test	0.25	5
Ppp1r12a	1.19148e-05	-0.257831	0.916	0.944	0.279808	Two-sided Wilcoxon test	0.25	5
Zbtb38	1.20228e-05	-0.155842	0.389	0.54	0.282343	Two-sided Wilcoxon test	0.25	5
Myl3	1.21763e-05	-0.385206	0.377	0.526	0.285947	Two-sided Wilcoxon test	0.25	5
F2r	1.21878e-05	-0.274519	0.834	0.874	0.286218	Two-sided Wilcoxon test	0.25	5
Pard3bos1	1.24354e-05	-0.220207	0.104	0.202	0.292032	Two-sided Wilcoxon test	0.25	5
Car2	1.24679e-05	0.318201	0.281	0.159	0.292796	Two-sided Wilcoxon test	0.25	5
Rpl13a	1.26156e-05	0.176421	0.979	0.974	0.296266	Two-sided Wilcoxon test	0.25	5
Rtn4	1.26814e-05	-0.252775	0.885	0.911	0.297811	Two-sided Wilcoxon test	0.25	5
Ptma	1.27733e-05	0.169536	0.997	1	0.299968	Two-sided Wilcoxon test	0.25	5
Ttc3	1.29387e-05	-0.208448	0.909	0.947	0.303852	Two-sided Wilcoxon test	0.25	5
Spns1	1.30765e-05	-0.13056	0.296	0.447	0.307089	Two-sided Wilcoxon test	0.25	5
Gm20721	1.38015e-05	-0.112113	0.326	0.483	0.324115	Two-sided Wilcoxon test	0.25	5
Inpp4b	1.48798e-05	-0.282579	0.738	0.801	0.349437	Two-sided Wilcoxon test	0.25	5
Tma7	1.51025e-05	0.210352	0.862	0.815	0.354668	Two-sided Wilcoxon test	0.25	5
Prdx1	1.55991e-05	0.215472	0.948	0.921	0.36633	Two-sided Wilcoxon test	0.25	5
Tspan14	1.57264e-05	-0.222577	0.605	0.732	0.36932	Two-sided Wilcoxon test	0.25	5
Chchd2	1.60454e-05	0.183089	0.943	0.927	0.37681	Two-sided Wilcoxon test	0.25	5
Ldlrad4	1.62285e-05	-0.374592	0.782	0.831	0.38111	Two-sided Wilcoxon test	0.25	5
Dut	1.7369e-05	0.268371	0.81	0.748	0.407894	Two-sided Wilcoxon test	0.25	5
Afp	1.78921e-05	0.105226	0.133	0.043	0.420178	Two-sided Wilcoxon test	0.25	5
Slc15a2	1.82746e-05	-0.0546461	0.069	0.156	0.42916	Two-sided Wilcoxon test	0.25	5
Rpl35	1.87002e-05	0.179075	0.953	0.94	0.439155	Two-sided Wilcoxon test	0.25	5
Ak4	1.91515e-05	-0.128952	0.208	0.344	0.449754	Two-sided Wilcoxon test	0.25	5
Cenpw	2.13658e-05	0.21865	0.434	0.331	0.501755	Two-sided Wilcoxon test	0.25	5
Nsmce4a	2.20767e-05	0.233379	0.747	0.689	0.518449	Two-sided Wilcoxon test	0.25	5
Fos	2.26832e-05	0.464827	0.743	0.652	0.532691	Two-sided Wilcoxon test	0.25	5
Gm15738	2.30884e-05	-0.150705	0.117	0.219	0.542207	Two-sided Wilcoxon test	0.25	5
Slc31a2	2.37051e-05	-0.0889692	0.23	0.374	0.55669	Two-sided Wilcoxon test	0.25	5
Phpt1	2.39309e-05	0.185127	0.546	0.46	0.561994	Two-sided Wilcoxon test	0.25	5
Rab5a	2.40666e-05	-0.244681	0.823	0.851	0.565181	Two-sided Wilcoxon test	0.25	5
Pou2f1	2.50735e-05	-0.228439	0.567	0.669	0.588826	Two-sided Wilcoxon test	0.25	5
Pcdh18	2.52609e-05	0.0750448	0.105	0.026	0.593226	Two-sided Wilcoxon test	0.25	5
Myo6	2.57993e-05	-0.274456	0.772	0.811	0.60587	Two-sided Wilcoxon test	0.25	5
Fosb	2.63261e-05	0.250847	0.722	0.606	0.618242	Two-sided Wilcoxon test	0.25	5
Cntf	2.67677e-05	-0.0334012	0.013	0.06	0.628612	Two-sided Wilcoxon test	0.25	5
Zfp992	2.75651e-05	-0.0896166	0.36	0.503	0.647339	Two-sided Wilcoxon test	0.25	5
Mdfi	2.75819e-05	-0.0818313	0.209	0.341	0.647732	Two-sided Wilcoxon test	0.25	5
Akap9	2.76106e-05	-0.231258	0.812	0.887	0.648407	Two-sided Wilcoxon test	0.25	5
Hexim2	3.1155e-05	-0.0505235	0.025	0.083	0.731643	Two-sided Wilcoxon test	0.25	5
1700085D07Rik	3.18102e-05	-0.180079	0.108	0.205	0.74703	Two-sided Wilcoxon test	0.25	5
Cacul1	3.18551e-05	-0.178992	0.625	0.742	0.748085	Two-sided Wilcoxon test	0.25	5
Mrpl14	3.2053e-05	0.177893	0.667	0.609	0.752732	Two-sided Wilcoxon test	0.25	5
Fgd5	3.28116e-05	-0.19516	0.802	0.851	0.770549	Two-sided Wilcoxon test	0.25	5
Peg3	3.30588e-05	0.406195	0.87	0.821	0.776352	Two-sided Wilcoxon test	0.25	5
Cdk17	3.34589e-05	-0.239215	0.791	0.861	0.78575	Two-sided Wilcoxon test	0.25	5
Adam10	3.36196e-05	-0.22693	0.854	0.877	0.789522	Two-sided Wilcoxon test	0.25	5
Pgap2	3.48003e-05	-0.160743	0.39	0.533	0.817251	Two-sided Wilcoxon test	0.25	5
Mrps16	3.54171e-05	0.19799	0.727	0.666	0.831735	Two-sided Wilcoxon test	0.25	5
Ccdc60	3.58684e-05	-0.0898128	0.079	0.166	0.842334	Two-sided Wilcoxon test	0.25	5
Col18a1	3.60915e-05	-0.209385	0.96	0.964	0.847573	Two-sided Wilcoxon test	0.25	5
Serinc3	3.65424e-05	-0.240527	0.779	0.831	0.858161	Two-sided Wilcoxon test	0.25	5
6430590A07Rik	3.72625e-05	-0.0691186	0.055	0.129	0.875072	Two-sided Wilcoxon test	0.25	5
Mrpl54	3.73242e-05	0.186637	0.728	0.672	0.876521	Two-sided Wilcoxon test	0.25	5
Esco1	3.73353e-05	-0.181889	0.407	0.543	0.876783	Two-sided Wilcoxon test	0.25	5
Hdhd5	3.80707e-05	-0.0707062	0.093	0.185	0.894053	Two-sided Wilcoxon test	0.25	5
Col4a3bp	3.9095e-05	-0.231107	0.672	0.752	0.918108	Two-sided Wilcoxon test	0.25	5
Tmem161b	3.98361e-05	-0.168998	0.3	0.437	0.935511	Two-sided Wilcoxon test	0.25	5
Rnf215	4.01994e-05	-0.0920285	0.22	0.354	0.944042	Two-sided Wilcoxon test	0.25	5
Elk3	4.04415e-05	-0.277538	0.868	0.887	0.949727	Two-sided Wilcoxon test	0.25	5
Rnft1	4.18792e-05	-0.115732	0.209	0.328	0.98349	Two-sided Wilcoxon test	0.25	5
Unc50	4.18879e-05	-0.123317	0.306	0.444	0.983695	Two-sided Wilcoxon test	0.25	5
Nr3c1	4.22828e-05	-0.194247	0.483	0.599	0.992969	Two-sided Wilcoxon test	0.25	5
Vcp	4.26699e-05	0.188611	0.913	0.874	1	Two-sided Wilcoxon test	0.25	5
Rcsd1	4.26773e-05	-0.241279	0.632	0.738	1	Two-sided Wilcoxon test	0.25	5
Car8	4.34488e-05	-0.226666	0.506	0.629	1	Two-sided Wilcoxon test	0.25	5
Dtymk	4.3864e-05	0.207214	0.78	0.722	1	Two-sided Wilcoxon test	0.25	5
Bmpr2	4.39302e-05	-0.281312	0.904	0.921	1	Two-sided Wilcoxon test	0.25	5
Txlnb	4.42479e-05	-0.102124	0.108	0.205	1	Two-sided Wilcoxon test	0.25	5
Cox14	4.44115e-05	0.204456	0.671	0.583	1	Two-sided Wilcoxon test	0.25	5
Schip1	4.44679e-05	-0.291033	0.605	0.685	1	Two-sided Wilcoxon test	0.25	5
Phb	4.68599e-05	-0.192764	0.546	0.652	1	Two-sided Wilcoxon test	0.25	5
Il31ra	4.6922e-05	-0.0554027	0.096	0.189	1	Two-sided Wilcoxon test	0.25	5
Scarb2	4.69281e-05	-0.129898	0.358	0.507	1	Two-sided Wilcoxon test	0.25	5
Pwwp2b	5.01444e-05	-0.0421901	0.087	0.175	1	Two-sided Wilcoxon test	0.25	5
Rpl36a-ps1	5.20258e-05	0.111381	0.252	0.149	1	Two-sided Wilcoxon test	0.25	5
Rpl18	5.292e-05	0.166721	0.984	0.974	1	Two-sided Wilcoxon test	0.25	5
Ralb	5.32903e-05	-0.202553	0.818	0.838	1	Two-sided Wilcoxon test	0.25	5
4933434E20Rik	5.62487e-05	-0.13838	0.357	0.497	1	Two-sided Wilcoxon test	0.25	5
Cdk2ap1	5.76316e-05	0.198574	0.554	0.477	1	Two-sided Wilcoxon test	0.25	5
Paip2	5.76325e-05	-0.14066	0.839	0.868	1	Two-sided Wilcoxon test	0.25	5
Baz2b	5.88483e-05	-0.280961	0.939	0.954	1	Two-sided Wilcoxon test	0.25	5
Sh3d19	5.95741e-05	-0.273997	0.791	0.868	1	Two-sided Wilcoxon test	0.25	5
Gm49958	5.96345e-05	-0.14317	0.075	0.156	1	Two-sided Wilcoxon test	0.25	5
Vsig10	6.21322e-05	-0.0664822	0.096	0.185	1	Two-sided Wilcoxon test	0.25	5
Gm49692	6.38313e-05	-0.204415	0.53	0.649	1	Two-sided Wilcoxon test	0.25	5
Gna12	6.4895e-05	-0.193567	0.593	0.695	1	Two-sided Wilcoxon test	0.25	5
Zfp74	6.51065e-05	-0.0505903	0.165	0.281	1	Two-sided Wilcoxon test	0.25	5
Alg1	6.63061e-05	-0.0472852	0.12	0.222	1	Two-sided Wilcoxon test	0.25	5
Ass1	6.8007e-05	-0.0611342	0.063	0.139	1	Two-sided Wilcoxon test	0.25	5
Rpl10a	6.83508e-05	0.152367	0.984	0.983	1	Two-sided Wilcoxon test	0.25	5
Zfp119a	6.87522e-05	-0.0389453	0.101	0.199	1	Two-sided Wilcoxon test	0.25	5
Snrpb2	6.90574e-05	0.20881	0.784	0.735	1	Two-sided Wilcoxon test	0.25	5
Fkbp3	6.96155e-05	0.227255	0.85	0.818	1	Two-sided Wilcoxon test	0.25	5
Ndufc2	7.01264e-05	0.208964	0.872	0.805	1	Two-sided Wilcoxon test	0.25	5
Cox17	7.0263e-05	0.189136	0.406	0.311	1	Two-sided Wilcoxon test	0.25	5
Actr2	7.29413e-05	-0.177505	0.803	0.815	1	Two-sided Wilcoxon test	0.25	5
Rpl9-ps6	7.29645e-05	0.123231	0.306	0.199	1	Two-sided Wilcoxon test	0.25	5
Tanc1	7.3641e-05	-0.256134	0.775	0.871	1	Two-sided Wilcoxon test	0.25	5
Ifi211	7.39097e-05	0.0961799	0.16	0.07	1	Two-sided Wilcoxon test	0.25	5
Tbc1d22bos	7.43142e-05	-0.0824343	0.012	0.053	1	Two-sided Wilcoxon test	0.25	5
Rps28	7.4672e-05	0.157067	0.956	0.94	1	Two-sided Wilcoxon test	0.25	5
0610009B22Rik	7.59206e-05	-0.114779	0.344	0.49	1	Two-sided Wilcoxon test	0.25	5
Rnf125	7.68306e-05	-0.114649	0.19	0.308	1	Two-sided Wilcoxon test	0.25	5
Psma2	7.71379e-05	0.205245	0.885	0.861	1	Two-sided Wilcoxon test	0.25	5
Smim11	7.859e-05	0.214659	0.628	0.556	1	Two-sided Wilcoxon test	0.25	5
Rab2a	7.97405e-05	-0.183789	0.943	0.954	1	Two-sided Wilcoxon test	0.25	5
Gm26936	8.14675e-05	-0.108549	0.061	0.136	1	Two-sided Wilcoxon test	0.25	5
Siva1	8.462e-05	0.250957	0.723	0.662	1	Two-sided Wilcoxon test	0.25	5
Gm48027	8.55454e-05	-0.0782098	0.101	0.195	1	Two-sided Wilcoxon test	0.25	5
Hace1	8.59784e-05	-0.224929	0.539	0.679	1	Two-sided Wilcoxon test	0.25	5
Tbrg1	8.69077e-05	0.227645	0.819	0.762	1	Two-sided Wilcoxon test	0.25	5
Gm4221	8.96381e-05	-0.0581749	0.071	0.149	1	Two-sided Wilcoxon test	0.25	5
Gm12743	9.07344e-05	-0.0582238	0.089	0.175	1	Two-sided Wilcoxon test	0.25	5
Dst	9.19487e-05	-0.255784	0.69	0.785	1	Two-sided Wilcoxon test	0.25	5
Zscan26	9.25567e-05	-0.18287	0.481	0.586	1	Two-sided Wilcoxon test	0.25	5
Slco2a1	9.35255e-05	-0.179236	0.234	0.351	1	Two-sided Wilcoxon test	0.25	5
Selenoh	9.38092e-05	0.24035	0.822	0.758	1	Two-sided Wilcoxon test	0.25	5
Arhgap27	9.44313e-05	-0.107556	0.134	0.235	1	Two-sided Wilcoxon test	0.25	5
Lamtor2	9.48074e-05	0.183142	0.75	0.675	1	Two-sided Wilcoxon test	0.25	5
Numb	9.48689e-05	-0.266068	0.824	0.854	1	Two-sided Wilcoxon test	0.25	5
Zfp219	9.60852e-05	-0.0875728	0.126	0.225	1	Two-sided Wilcoxon test	0.25	5
Mecom	9.66271e-05	-0.375604	0.876	0.911	1	Two-sided Wilcoxon test	0.25	5
Kmt5b	9.77426e-05	-0.154085	0.644	0.765	1	Two-sided Wilcoxon test	0.25	5
Stat6	9.85066e-05	-0.0725095	0.152	0.255	1	Two-sided Wilcoxon test	0.25	5
She	0.000100671	-0.228903	0.587	0.685	1	Two-sided Wilcoxon test	0.25	5
Hdac8	0.000103999	-0.239208	0.605	0.712	1	Two-sided Wilcoxon test	0.25	5
Wac	0.000105365	-0.223964	0.893	0.917	1	Two-sided Wilcoxon test	0.25	5
Luzp1	0.000105459	-0.261156	0.852	0.887	1	Two-sided Wilcoxon test	0.25	5
Txndc16	0.000106364	-0.117442	0.244	0.364	1	Two-sided Wilcoxon test	0.25	5
Zfp280d	0.000106374	-0.222059	0.814	0.848	1	Two-sided Wilcoxon test	0.25	5
Hmcn1	0.000108522	-0.351231	0.828	0.874	1	Two-sided Wilcoxon test	0.25	5
Calr	0.000109767	-0.198207	0.907	0.93	1	Two-sided Wilcoxon test	0.25	5
Ric8a	0.000115465	-0.104815	0.208	0.325	1	Two-sided Wilcoxon test	0.25	5
Pin4	0.000117632	0.146822	0.426	0.334	1	Two-sided Wilcoxon test	0.25	5
Trip12	0.000117974	-0.233714	0.925	0.957	1	Two-sided Wilcoxon test	0.25	5
Ybx3	0.000121399	0.222413	0.85	0.775	1	Two-sided Wilcoxon test	0.25	5
Gm15563	0.000126763	-0.186668	0.198	0.318	1	Two-sided Wilcoxon test	0.25	5
Ddx5	0.000128776	0.111021	0.951	0.957	1	Two-sided Wilcoxon test	0.25	5
Klhl4	0.000130488	-0.256288	0.855	0.887	1	Two-sided Wilcoxon test	0.25	5
Gm20631	0.000137365	-0.579655	0.212	0.315	1	Two-sided Wilcoxon test	0.25	5
Nr2c2	0.00013883	-0.239919	0.622	0.758	1	Two-sided Wilcoxon test	0.25	5
Sdf2	0.00013951	-0.132871	0.449	0.579	1	Two-sided Wilcoxon test	0.25	5
Sub1	0.000141174	0.163936	0.921	0.921	1	Two-sided Wilcoxon test	0.25	5
Txnip	0.000144348	-0.285233	0.627	0.699	1	Two-sided Wilcoxon test	0.25	5
Gm37229	0.000145768	-0.0922807	0.033	0.089	1	Two-sided Wilcoxon test	0.25	5
Ccdc102a	0.000153414	-0.128393	0.32	0.44	1	Two-sided Wilcoxon test	0.25	5
Tmem260	0.000154905	-0.125955	0.304	0.437	1	Two-sided Wilcoxon test	0.25	5
Elovl1	0.00015581	-0.12869	0.318	0.447	1	Two-sided Wilcoxon test	0.25	5
Smurf2	0.000156129	-0.215012	0.814	0.877	1	Two-sided Wilcoxon test	0.25	5
Hyal2	0.000158151	-0.117861	0.447	0.579	1	Two-sided Wilcoxon test	0.25	5
Mcl1	0.000158569	-0.148395	0.852	0.858	1	Two-sided Wilcoxon test	0.25	5
Slc9a1	0.000161183	-0.149758	0.313	0.44	1	Two-sided Wilcoxon test	0.25	5
Pgk1	0.000161978	-0.263043	0.863	0.874	1	Two-sided Wilcoxon test	0.25	5
Smarcd1	0.000165649	0.182762	0.691	0.626	1	Two-sided Wilcoxon test	0.25	5
Hnrnpa3	0.00016622	0.151533	0.932	0.924	1	Two-sided Wilcoxon test	0.25	5
Tecpr1	0.000169255	-0.119464	0.358	0.49	1	Two-sided Wilcoxon test	0.25	5
Anxa5	0.000169765	-0.207598	0.811	0.841	1	Two-sided Wilcoxon test	0.25	5
Bola2	0.000173553	0.212111	0.581	0.536	1	Two-sided Wilcoxon test	0.25	5
Itm2b	0.000178011	-0.233714	0.883	0.874	1	Two-sided Wilcoxon test	0.25	5
Hif1an	0.000179203	-0.138775	0.297	0.427	1	Two-sided Wilcoxon test	0.25	5
Arpc4	0.000181553	-0.110405	0.672	0.725	1	Two-sided Wilcoxon test	0.25	5
Cfh	0.00018237	-0.327586	0.329	0.437	1	Two-sided Wilcoxon test	0.25	5
Kit	0.000182524	-0.159327	0.387	0.517	1	Two-sided Wilcoxon test	0.25	5
Thsd1	0.000183584	-0.226275	0.598	0.712	1	Two-sided Wilcoxon test	0.25	5
E130308A19Rik	0.000186101	-0.248599	0.663	0.781	1	Two-sided Wilcoxon test	0.25	5
mt-Cytb	0.000187016	-0.267413	0.992	0.997	1	Two-sided Wilcoxon test	0.25	5
Tpm1	0.000187453	0.21008	0.916	0.907	1	Two-sided Wilcoxon test	0.25	5
Cul3	0.000187848	-0.212322	0.784	0.854	1	Two-sided Wilcoxon test	0.25	5
4930484I04Rik	0.000194276	-0.100895	0.137	0.238	1	Two-sided Wilcoxon test	0.25	5
Eno1	0.000194303	-0.250927	0.834	0.851	1	Two-sided Wilcoxon test	0.25	5
St7l	0.000195934	-0.143688	0.381	0.507	1	Two-sided Wilcoxon test	0.25	5
Gm20275	0.000196756	-0.151288	0.188	0.295	1	Two-sided Wilcoxon test	0.25	5
Srp19	0.000199167	0.221606	0.752	0.675	1	Two-sided Wilcoxon test	0.25	5
Slc35b3	0.000200911	-0.187841	0.373	0.503	1	Two-sided Wilcoxon test	0.25	5
Kri1	0.000201534	-0.124614	0.134	0.228	1	Two-sided Wilcoxon test	0.25	5
Zfc3h1	0.000202925	-0.185358	0.698	0.781	1	Two-sided Wilcoxon test	0.25	5
Usf1	0.000204605	-0.0692006	0.261	0.397	1	Two-sided Wilcoxon test	0.25	5
March7	0.000208297	-0.173588	0.819	0.851	1	Two-sided Wilcoxon test	0.25	5
Hspe1-rs1	0.000214866	-0.0927651	0.218	0.328	1	Two-sided Wilcoxon test	0.25	5
Kdm5a	0.000215815	-0.177802	0.828	0.874	1	Two-sided Wilcoxon test	0.25	5
Hist1h2an	0.000220334	0.152777	0.253	0.156	1	Two-sided Wilcoxon test	0.25	5
Eif3e	0.000220742	-0.128683	0.872	0.884	1	Two-sided Wilcoxon test	0.25	5
Fbxl6	0.000223303	-0.0998579	0.268	0.387	1	Two-sided Wilcoxon test	0.25	5
Qsox1	0.000223493	-0.0903612	0.228	0.338	1	Two-sided Wilcoxon test	0.25	5
Vsig2	0.00022366	-0.0205215	0.024	0.073	1	Two-sided Wilcoxon test	0.25	5
Htatip2	0.000225615	-0.0340535	0.052	0.119	1	Two-sided Wilcoxon test	0.25	5
Rack1	0.000228896	-0.108026	0.973	0.967	1	Two-sided Wilcoxon test	0.25	5
Snx6	0.000229161	0.192321	0.854	0.795	1	Two-sided Wilcoxon test	0.25	5
Golph3	0.000229631	-0.15151	0.589	0.685	1	Two-sided Wilcoxon test	0.25	5
Cbx5	0.000230706	0.172233	0.866	0.828	1	Two-sided Wilcoxon test	0.25	5
Pabpc1	0.000233888	-0.160578	0.904	0.891	1	Two-sided Wilcoxon test	0.25	5
Tnip2	0.000234525	-0.0299557	0.124	0.222	1	Two-sided Wilcoxon test	0.25	5
Stmn1	0.000236494	0.190772	0.919	0.887	1	Two-sided Wilcoxon test	0.25	5
Gigyf2	0.000238034	-0.21921	0.651	0.755	1	Two-sided Wilcoxon test	0.25	5
Zfp951	0.000238836	-0.107223	0.061	0.129	1	Two-sided Wilcoxon test	0.25	5
Crabp1	0.000240021	0.215701	0.129	0.053	1	Two-sided Wilcoxon test	0.25	5
Gm16023	0.000243379	-0.0544341	0.039	0.096	1	Two-sided Wilcoxon test	0.25	5
Hltf	0.000247205	-0.119138	0.368	0.497	1	Two-sided Wilcoxon test	0.25	5
Tm2d2	0.000248733	-0.126799	0.43	0.56	1	Two-sided Wilcoxon test	0.25	5
Fuz	0.000249377	-0.0452786	0.053	0.119	1	Two-sided Wilcoxon test	0.25	5
Shroom2	0.00025085	-0.201945	0.722	0.818	1	Two-sided Wilcoxon test	0.25	5
Ppfibp1	0.000252112	-0.214823	0.816	0.858	1	Two-sided Wilcoxon test	0.25	5
Iqcb1	0.000256053	-0.145736	0.499	0.619	1	Two-sided Wilcoxon test	0.25	5
AY036118	0.000258026	-0.389224	0.997	1	1	Two-sided Wilcoxon test	0.25	5
Flt1	0.000265178	-0.262896	0.945	0.954	1	Two-sided Wilcoxon test	0.25	5
Emc1	0.000266659	-0.0959352	0.221	0.334	1	Two-sided Wilcoxon test	0.25	5
Fam181b	0.00026884	-0.0501619	0.065	0.136	1	Two-sided Wilcoxon test	0.25	5
Cybc1	0.000269148	-0.0663425	0.196	0.311	1	Two-sided Wilcoxon test	0.25	5
Edem3	0.000269222	-0.123804	0.352	0.474	1	Two-sided Wilcoxon test	0.25	5
Selenof	0.000271967	-0.149352	0.834	0.828	1	Two-sided Wilcoxon test	0.25	5
Ttc5	0.000272239	-0.133267	0.419	0.546	1	Two-sided Wilcoxon test	0.25	5
Mcm3	0.000274289	0.188159	0.711	0.652	1	Two-sided Wilcoxon test	0.25	5
Erg	0.000275747	-0.18738	0.497	0.613	1	Two-sided Wilcoxon test	0.25	5
Gngt2	0.000276131	0.267218	0.692	0.646	1	Two-sided Wilcoxon test	0.25	5
Pds5a	0.000276793	-0.210114	0.843	0.884	1	Two-sided Wilcoxon test	0.25	5
Gbp7	0.000288161	-0.0405368	0.045	0.106	1	Two-sided Wilcoxon test	0.25	5
Il10rb	0.000289074	-0.0557275	0.162	0.268	1	Two-sided Wilcoxon test	0.25	5
Mob3c	0.000289451	-0.0403396	0.089	0.169	1	Two-sided Wilcoxon test	0.25	5
Pcdhga3	0.00029132	-0.0237505	0.027	0.076	1	Two-sided Wilcoxon test	0.25	5
Trim47	0.000295435	-0.138871	0.365	0.48	1	Two-sided Wilcoxon test	0.25	5
Sf3a3	0.000295904	0.181345	0.699	0.669	1	Two-sided Wilcoxon test	0.25	5
Plekhf1	0.000297615	-0.0293136	0.021	0.066	1	Two-sided Wilcoxon test	0.25	5
Arhgap12	0.000297742	-0.196554	0.529	0.632	1	Two-sided Wilcoxon test	0.25	5
H2-D1	0.000298081	-0.0812707	0.153	0.252	1	Two-sided Wilcoxon test	0.25	5
Prxl2c	0.000299856	-0.16183	0.502	0.609	1	Two-sided Wilcoxon test	0.25	5
Ndel1	0.000300653	-0.180163	0.605	0.702	1	Two-sided Wilcoxon test	0.25	5
Ggta1	0.000301445	-0.27493	0.708	0.752	1	Two-sided Wilcoxon test	0.25	5
Igf1	0.00030952	-0.30303	0.704	0.791	1	Two-sided Wilcoxon test	0.25	5
Ran	0.000311309	0.184429	0.915	0.901	1	Two-sided Wilcoxon test	0.25	5
Tmx3	0.000313481	-0.139989	0.573	0.699	1	Two-sided Wilcoxon test	0.25	5
Phf14	0.000314563	-0.191122	0.843	0.871	1	Two-sided Wilcoxon test	0.25	5
Diaph2	0.000318284	-0.244507	0.776	0.844	1	Two-sided Wilcoxon test	0.25	5
Col26a1	0.000318711	0.244885	0.538	0.444	1	Two-sided Wilcoxon test	0.25	5
Yme1l1	0.000319903	-0.139888	0.743	0.808	1	Two-sided Wilcoxon test	0.25	5
Usp19	0.000320109	-0.187856	0.389	0.507	1	Two-sided Wilcoxon test	0.25	5
F11r	0.000321383	-0.168165	0.557	0.675	1	Two-sided Wilcoxon test	0.25	5
Impad1	0.000329168	-0.152113	0.654	0.728	1	Two-sided Wilcoxon test	0.25	5
Sparcl1	0.000330184	-0.19626	0.21	0.308	1	Two-sided Wilcoxon test	0.25	5
Tie1	0.000333507	-0.17729	0.795	0.818	1	Two-sided Wilcoxon test	0.25	5
Magoh	0.000342948	0.18363	0.808	0.788	1	Two-sided Wilcoxon test	0.25	5
Ptp4a1	0.00034668	-0.0434958	0.053	0.116	1	Two-sided Wilcoxon test	0.25	5
Psmc4	0.000353381	0.196284	0.82	0.785	1	Two-sided Wilcoxon test	0.25	5
Exosc5	0.000359908	-0.123338	0.414	0.536	1	Two-sided Wilcoxon test	0.25	5
Zc3h7a	0.000360585	-0.151002	0.67	0.775	1	Two-sided Wilcoxon test	0.25	5
Ifngr1	0.000362733	-0.0943927	0.443	0.57	1	Two-sided Wilcoxon test	0.25	5
CAAA01118383.1	0.000363656	-0.118757	0.252	0.354	1	Two-sided Wilcoxon test	0.25	5
Pqlc1	0.000366116	-0.11823	0.337	0.457	1	Two-sided Wilcoxon test	0.25	5
Tjp2	0.000367065	-0.295094	0.658	0.745	1	Two-sided Wilcoxon test	0.25	5
Taf2	0.000375471	-0.187817	0.495	0.609	1	Two-sided Wilcoxon test	0.25	5
Arf4	0.000381388	-0.158504	0.913	0.94	1	Two-sided Wilcoxon test	0.25	5
Ndufb6	0.000382615	0.210565	0.672	0.613	1	Two-sided Wilcoxon test	0.25	5
Mtrex	0.000385853	0.186631	0.682	0.626	1	Two-sided Wilcoxon test	0.25	5
Tenm4	0.00039168	0.343071	0.189	0.103	1	Two-sided Wilcoxon test	0.25	5
Ssb	0.00039194	0.164029	0.921	0.881	1	Two-sided Wilcoxon test	0.25	5
Emcn	0.00039244	-0.228489	0.903	0.927	1	Two-sided Wilcoxon test	0.25	5
Ppm1f	0.000395264	-0.097232	0.352	0.474	1	Two-sided Wilcoxon test	0.25	5
Unc5a	0.00039902	-0.0403553	0.029	0.079	1	Two-sided Wilcoxon test	0.25	5
Gfod2	0.000401753	-0.107067	0.25	0.368	1	Two-sided Wilcoxon test	0.25	5
Zmat2	0.000405381	0.164904	0.743	0.699	1	Two-sided Wilcoxon test	0.25	5
Spopl	0.000412317	-0.185184	0.446	0.57	1	Two-sided Wilcoxon test	0.25	5
Srp54a	0.000412901	-0.0996795	0.256	0.371	1	Two-sided Wilcoxon test	0.25	5
Rtl8b	0.000418048	-0.0694098	0.17	0.275	1	Two-sided Wilcoxon test	0.25	5
Gm32036	0.000418761	-0.190522	0.164	0.258	1	Two-sided Wilcoxon test	0.25	5
Gm50163	0.000428592	-0.065295	0.028	0.076	1	Two-sided Wilcoxon test	0.25	5
Gm15283	0.000431317	-0.133474	0.266	0.368	1	Two-sided Wilcoxon test	0.25	5
Rrp36	0.000435788	-0.0641901	0.233	0.351	1	Two-sided Wilcoxon test	0.25	5
Jund	0.000435949	0.201595	0.931	0.914	1	Two-sided Wilcoxon test	0.25	5
Fmo5	0.000439673	-0.0344568	0.024	0.07	1	Two-sided Wilcoxon test	0.25	5
Tab1	0.000440482	-0.0818831	0.12	0.209	1	Two-sided Wilcoxon test	0.25	5
Scyl3	0.000445739	-0.0781152	0.16	0.262	1	Two-sided Wilcoxon test	0.25	5
Mfap4	0.000445967	0.0940942	0.117	0.046	1	Two-sided Wilcoxon test	0.25	5
Tbc1d32	0.000449349	-0.167752	0.258	0.371	1	Two-sided Wilcoxon test	0.25	5
Ybx1	0.000450315	0.149913	0.955	0.954	1	Two-sided Wilcoxon test	0.25	5
Nrg4	0.000457038	-0.0542546	0.027	0.073	1	Two-sided Wilcoxon test	0.25	5
Dpy30	0.00046576	0.213493	0.727	0.685	1	Two-sided Wilcoxon test	0.25	5
Nme2	0.000471577	0.164666	0.952	0.95	1	Two-sided Wilcoxon test	0.25	5
Slu7	0.000480019	-0.0671184	0.413	0.543	1	Two-sided Wilcoxon test	0.25	5
Bfsp2	0.000482603	-0.0386607	0.053	0.116	1	Two-sided Wilcoxon test	0.25	5
Wdr17	0.000482649	-0.254044	0.18	0.281	1	Two-sided Wilcoxon test	0.25	5
Bud31	0.000483469	0.149497	0.651	0.579	1	Two-sided Wilcoxon test	0.25	5
Ndufa1	0.000484975	0.157163	0.523	0.46	1	Two-sided Wilcoxon test	0.25	5
Tmem50a	0.000498159	-0.164038	0.666	0.732	1	Two-sided Wilcoxon test	0.25	5
Arhgap17	0.000501713	-0.184064	0.555	0.679	1	Two-sided Wilcoxon test	0.25	5
Dab2ip	0.00050358	-0.158875	0.699	0.788	1	Two-sided Wilcoxon test	0.25	5
Zfp950	0.000506154	-0.0609356	0.288	0.411	1	Two-sided Wilcoxon test	0.25	5
Nos1ap	0.000507795	-0.19914	0.357	0.487	1	Two-sided Wilcoxon test	0.25	5
Dera	0.000510196	-0.160683	0.547	0.639	1	Two-sided Wilcoxon test	0.25	5
Il27ra	0.000516749	-0.0364302	0.049	0.109	1	Two-sided Wilcoxon test	0.25	5
Myzap	0.00051905	-0.273894	0.579	0.695	1	Two-sided Wilcoxon test	0.25	5
Stk3	0.000524689	-0.233391	0.842	0.894	1	Two-sided Wilcoxon test	0.25	5
Plcb1	0.000527324	-0.407749	0.411	0.503	1	Two-sided Wilcoxon test	0.25	5
Gm49915	0.000528115	-0.139275	0.056	0.116	1	Two-sided Wilcoxon test	0.25	5
Srgap2	0.00052942	-0.18991	0.913	0.934	1	Two-sided Wilcoxon test	0.25	5
Cdan1	0.000544571	-0.0912634	0.113	0.195	1	Two-sided Wilcoxon test	0.25	5
Anapc7	0.000549088	-0.162113	0.494	0.606	1	Two-sided Wilcoxon test	0.25	5
Dusp1	0.000551623	0.274989	0.611	0.543	1	Two-sided Wilcoxon test	0.25	5
Azin1	0.000557305	-0.214449	0.598	0.712	1	Two-sided Wilcoxon test	0.25	5
Malat1	0.000564685	-0.367496	1	1	1	Two-sided Wilcoxon test	0.25	5
Fam171a2	0.000571035	-0.1323	0.361	0.474	1	Two-sided Wilcoxon test	0.25	5
A930012L18Rik	0.00057388	-0.0965912	0.037	0.089	1	Two-sided Wilcoxon test	0.25	5
Slk	0.000576195	-0.247834	0.776	0.821	1	Two-sided Wilcoxon test	0.25	5
Csgalnact1	0.000578308	-0.294394	0.674	0.719	1	Two-sided Wilcoxon test	0.25	5
Usp34	0.000578786	-0.225422	0.92	0.937	1	Two-sided Wilcoxon test	0.25	5
Srsf2	0.000581762	0.177892	0.881	0.844	1	Two-sided Wilcoxon test	0.25	5
Acadl	0.000585999	-0.180316	0.688	0.732	1	Two-sided Wilcoxon test	0.25	5
Smg6	0.000599552	-0.17888	0.859	0.891	1	Two-sided Wilcoxon test	0.25	5
Tgfbi	0.000601081	-0.126612	0.302	0.411	1	Two-sided Wilcoxon test	0.25	5
Hist1h3c	0.000607542	0.233473	0.333	0.245	1	Two-sided Wilcoxon test	0.25	5
Gm49226	0.000610805	-0.037972	0.027	0.073	1	Two-sided Wilcoxon test	0.25	5
Gnl1	0.000611643	-0.0894274	0.284	0.394	1	Two-sided Wilcoxon test	0.25	5
Mrps14	0.000612009	0.156122	0.783	0.719	1	Two-sided Wilcoxon test	0.25	5
Ncl	0.000614095	0.189698	0.953	0.934	1	Two-sided Wilcoxon test	0.25	5
Nek4	0.0006145	-0.0521791	0.081	0.152	1	Two-sided Wilcoxon test	0.25	5
Zfp607a	0.000617993	-0.0587785	0.047	0.103	1	Two-sided Wilcoxon test	0.25	5
Hist1h4d	0.00061916	0.242715	0.493	0.411	1	Two-sided Wilcoxon test	0.25	5
Myh7	0.000626045	-0.155614	0.153	0.245	1	Two-sided Wilcoxon test	0.25	5
A830082K12Rik	0.000631181	0.0738268	0.16	0.083	1	Two-sided Wilcoxon test	0.25	5
Gpr107	0.000632707	-0.140474	0.449	0.579	1	Two-sided Wilcoxon test	0.25	5
Ptprm	0.000641414	-0.316596	0.968	0.97	1	Two-sided Wilcoxon test	0.25	5
Slc25a3	0.000648621	-0.139203	0.877	0.848	1	Two-sided Wilcoxon test	0.25	5
Lix1l	0.000651562	-0.110683	0.288	0.394	1	Two-sided Wilcoxon test	0.25	5
Rpl5	0.000653471	-0.116943	0.976	0.987	1	Two-sided Wilcoxon test	0.25	5
Rapgef5	0.000655389	-0.257365	0.913	0.934	1	Two-sided Wilcoxon test	0.25	5
Morf4l1	0.000659303	0.12606	0.936	0.911	1	Two-sided Wilcoxon test	0.25	5
Lyar	0.00066171	0.170654	0.662	0.616	1	Two-sided Wilcoxon test	0.25	5
Dmtn	0.00066517	-0.0832358	0.101	0.179	1	Two-sided Wilcoxon test	0.25	5
Chst15	0.000670373	-0.0539537	0.121	0.205	1	Two-sided Wilcoxon test	0.25	5
Luc7l2	0.000673665	-0.170504	0.945	0.96	1	Two-sided Wilcoxon test	0.25	5
Golga5	0.000675172	-0.0594994	0.382	0.5	1	Two-sided Wilcoxon test	0.25	5
Acvrl1	0.000675278	-0.10222	0.116	0.195	1	Two-sided Wilcoxon test	0.25	5
Klhl6	0.000681635	-0.184035	0.788	0.858	1	Two-sided Wilcoxon test	0.25	5
Vgll4	0.000683847	-0.15281	0.688	0.772	1	Two-sided Wilcoxon test	0.25	5
Pdlim3	0.000684127	-0.24004	0.498	0.596	1	Two-sided Wilcoxon test	0.25	5
Sf3b4	0.000684933	0.150828	0.549	0.467	1	Two-sided Wilcoxon test	0.25	5
Hyal1	0.000692843	-0.0328194	0.021	0.063	1	Two-sided Wilcoxon test	0.25	5
Il6st	0.000694685	-0.211565	0.682	0.742	1	Two-sided Wilcoxon test	0.25	5
Apbb2	0.00069835	-0.163314	0.772	0.868	1	Two-sided Wilcoxon test	0.25	5
Dynlt1c	0.000702022	-0.0224964	0.021	0.063	1	Two-sided Wilcoxon test	0.25	5
Irak4	0.000707772	-0.055915	0.116	0.199	1	Two-sided Wilcoxon test	0.25	5
Zfp521	0.000710938	-0.221191	0.917	0.96	1	Two-sided Wilcoxon test	0.25	5
Ss18l1	0.00071524	-0.059518	0.052	0.109	1	Two-sided Wilcoxon test	0.25	5
Ccnl2	0.000715393	-0.159577	0.742	0.821	1	Two-sided Wilcoxon test	0.25	5
Stx4a	0.000717671	-0.0618652	0.27	0.391	1	Two-sided Wilcoxon test	0.25	5
Drg2	0.000717954	-0.118666	0.314	0.424	1	Two-sided Wilcoxon test	0.25	5
Vps33a	0.000719934	-0.0997979	0.277	0.394	1	Two-sided Wilcoxon test	0.25	5
Eif3c	0.000725802	0.185737	0.871	0.821	1	Two-sided Wilcoxon test	0.25	5
Ift140	0.000730746	-0.105012	0.189	0.288	1	Two-sided Wilcoxon test	0.25	5
Gm27201	0.00073487	-0.128614	0.076	0.142	1	Two-sided Wilcoxon test	0.25	5
Ifitm2	0.000739427	0.162866	0.864	0.848	1	Two-sided Wilcoxon test	0.25	5
Rbm6	0.000740311	-0.180979	0.827	0.891	1	Two-sided Wilcoxon test	0.25	5
Atp6v0d1	0.000741272	-0.0938359	0.415	0.55	1	Two-sided Wilcoxon test	0.25	5
Eftud2	0.00074169	0.15053	0.634	0.593	1	Two-sided Wilcoxon test	0.25	5
Gypa	0.000746221	0.0733458	0.091	0.03	1	Two-sided Wilcoxon test	0.25	5
Eny2	0.000746303	0.157077	0.828	0.821	1	Two-sided Wilcoxon test	0.25	5
Rnaseh2c	0.000754803	0.149488	0.714	0.669	1	Two-sided Wilcoxon test	0.25	5
Selenoi	0.000756079	-0.173856	0.293	0.401	1	Two-sided Wilcoxon test	0.25	5
Sil1	0.000757201	-0.164693	0.497	0.619	1	Two-sided Wilcoxon test	0.25	5
Ntn4	0.000759066	-0.0533776	0.025	0.07	1	Two-sided Wilcoxon test	0.25	5
Tiam1	0.000760254	-0.118593	0.687	0.785	1	Two-sided Wilcoxon test	0.25	5
Ints6l	0.000760464	-0.221818	0.411	0.52	1	Two-sided Wilcoxon test	0.25	5
Ccn2	0.000773551	-0.0616687	0.063	0.126	1	Two-sided Wilcoxon test	0.25	5
Prpf39	0.000774734	-0.131653	0.609	0.728	1	Two-sided Wilcoxon test	0.25	5
Adgrb3	0.000779526	0.144085	0.063	0.013	1	Two-sided Wilcoxon test	0.25	5
Cdk7	0.000781329	-0.199086	0.514	0.606	1	Two-sided Wilcoxon test	0.25	5
Prrg2	0.000790342	-0.0293364	0.113	0.195	1	Two-sided Wilcoxon test	0.25	5
Brms1	0.00080808	-0.119777	0.34	0.464	1	Two-sided Wilcoxon test	0.25	5
Nolc1	0.000813618	0.175572	0.675	0.623	1	Two-sided Wilcoxon test	0.25	5
Fbxw11	0.000814274	-0.201633	0.744	0.821	1	Two-sided Wilcoxon test	0.25	5
Rint1	0.000815378	-0.155136	0.333	0.44	1	Two-sided Wilcoxon test	0.25	5
Ranbp1	0.000838811	0.161876	0.921	0.884	1	Two-sided Wilcoxon test	0.25	5
Zfp157	0.000839485	-0.111285	0.314	0.444	1	Two-sided Wilcoxon test	0.25	5
Upf2	0.000843689	-0.173176	0.591	0.705	1	Two-sided Wilcoxon test	0.25	5
Ubxn4	0.000847512	-0.149812	0.8	0.864	1	Two-sided Wilcoxon test	0.25	5
Ier3ip1	0.000852222	0.136723	0.686	0.629	1	Two-sided Wilcoxon test	0.25	5
Gm31763	0.000856551	-0.0821943	0.089	0.162	1	Two-sided Wilcoxon test	0.25	5
Fam8a1	0.000857823	-0.100248	0.365	0.493	1	Two-sided Wilcoxon test	0.25	5
Wdr26	0.000861511	-0.192087	0.798	0.828	1	Two-sided Wilcoxon test	0.25	5
Txndc5	0.000868798	-0.153408	0.68	0.748	1	Two-sided Wilcoxon test	0.25	5
Eef2	0.000873048	-0.136954	0.912	0.921	1	Two-sided Wilcoxon test	0.25	5
Fam104a	0.00088176	0.18832	0.795	0.728	1	Two-sided Wilcoxon test	0.25	5
Gtsf2	0.000891798	0.036649	0.072	0.02	1	Two-sided Wilcoxon test	0.25	5
Kat6a	0.000892949	-0.180264	0.656	0.758	1	Two-sided Wilcoxon test	0.25	5
Sppl2b	0.000908991	-0.0396838	0.111	0.189	1	Two-sided Wilcoxon test	0.25	5
Fam89a	0.000910337	-0.0845926	0.089	0.159	1	Two-sided Wilcoxon test	0.25	5
Arf6	0.000920965	0.13731	0.533	0.437	1	Two-sided Wilcoxon test	0.25	5
Egr1	0.000921213	0.36508	0.668	0.616	1	Two-sided Wilcoxon test	0.25	5
Zfp691	0.000927694	-0.0274725	0.039	0.089	1	Two-sided Wilcoxon test	0.25	5
Ankrd24	0.000929062	-0.0536404	0.17	0.265	1	Two-sided Wilcoxon test	0.25	5
Bst2	0.000932222	-0.0856884	0.322	0.43	1	Two-sided Wilcoxon test	0.25	5
Ddr2	0.000935114	0.0848448	0.093	0.033	1	Two-sided Wilcoxon test	0.25	5
Cd34	0.000936099	-0.283475	0.623	0.679	1	Two-sided Wilcoxon test	0.25	5
Acox3	0.0009391	-0.034972	0.075	0.142	1	Two-sided Wilcoxon test	0.25	5
Mettl2	0.000941401	-0.141898	0.378	0.503	1	Two-sided Wilcoxon test	0.25	5
Itsn1	0.00094196	-0.193694	0.719	0.772	1	Two-sided Wilcoxon test	0.25	5
Primpol	0.000962797	-0.0764764	0.228	0.331	1	Two-sided Wilcoxon test	0.25	5
Tipin	0.000967234	0.196768	0.686	0.596	1	Two-sided Wilcoxon test	0.25	5
Rfx7	0.000975896	-0.217896	0.738	0.805	1	Two-sided Wilcoxon test	0.25	5
Zfp983	0.000981506	-0.0269058	0.069	0.136	1	Two-sided Wilcoxon test	0.25	5
Rplp0	0.000984195	-0.128448	0.996	0.99	1	Two-sided Wilcoxon test	0.25	5
Gm49959	0.000995834	-0.128949	0.306	0.414	1	Two-sided Wilcoxon test	0.25	5
Srsf11	0.000998499	-0.167817	0.905	0.921	1	Two-sided Wilcoxon test	0.25	5
Ndufa4l2	0.0010017	-0.0667083	0.053	0.109	1	Two-sided Wilcoxon test	0.25	5
Hsph1	0.0010026	0.13462	0.601	0.487	1	Two-sided Wilcoxon test	0.25	5
Mfsd6	0.00101576	-0.125261	0.156	0.242	1	Two-sided Wilcoxon test	0.25	5
Dcp1a	0.00102011	-0.159124	0.366	0.474	1	Two-sided Wilcoxon test	0.25	5
Xpr1	0.00102135	-0.149303	0.546	0.652	1	Two-sided Wilcoxon test	0.25	5
1110019D14Rik	0.00103332	-0.066808	0.104	0.179	1	Two-sided Wilcoxon test	0.25	5
Mmadhc	0.00103362	-0.0921954	0.421	0.546	1	Two-sided Wilcoxon test	0.25	5
Rabggtb	0.00103568	-0.120049	0.41	0.526	1	Two-sided Wilcoxon test	0.25	5
Map2k6	0.00103776	-0.211344	0.539	0.656	1	Two-sided Wilcoxon test	0.25	5
Tanc2	0.00103784	-0.23208	0.884	0.917	1	Two-sided Wilcoxon test	0.25	5
Nid1	0.00105397	-0.143042	0.881	0.891	1	Two-sided Wilcoxon test	0.25	5
Fzd6	0.001057	-0.059529	0.208	0.308	1	Two-sided Wilcoxon test	0.25	5
Fmnl3	0.0010596	-0.151036	0.591	0.692	1	Two-sided Wilcoxon test	0.25	5
9930012K11Rik	0.00106482	-0.0620106	0.119	0.199	1	Two-sided Wilcoxon test	0.25	5
Cnot2	0.00107019	-0.177861	0.831	0.884	1	Two-sided Wilcoxon test	0.25	5
Ripk1	0.00107472	-0.190909	0.477	0.586	1	Two-sided Wilcoxon test	0.25	5
Notch4	0.00108578	-0.0305039	0.26	0.374	1	Two-sided Wilcoxon test	0.25	5
Col11a1	0.00108966	0.168393	0.249	0.162	1	Two-sided Wilcoxon test	0.25	5
Inafm1	0.00109263	-0.0464927	0.079	0.146	1	Two-sided Wilcoxon test	0.25	5
Cdh10	0.00109866	0.0588929	0.055	0.01	1	Two-sided Wilcoxon test	0.25	5
Gm16286	0.00110592	-0.125924	0.623	0.719	1	Two-sided Wilcoxon test	0.25	5
Rbfox2	0.00110884	-0.227103	0.876	0.911	1	Two-sided Wilcoxon test	0.25	5
Fnbp4	0.00111425	-0.170501	0.621	0.719	1	Two-sided Wilcoxon test	0.25	5
Tut4	0.00112523	-0.194435	0.907	0.954	1	Two-sided Wilcoxon test	0.25	5
Nfkbia	0.00112749	-0.148422	0.497	0.599	1	Two-sided Wilcoxon test	0.25	5
Supt4a	0.00113677	0.172738	0.79	0.712	1	Two-sided Wilcoxon test	0.25	5
Gdpd5	0.00113712	-0.094973	0.438	0.56	1	Two-sided Wilcoxon test	0.25	5
Sh3tc2	0.00114771	-0.0771889	0.152	0.238	1	Two-sided Wilcoxon test	0.25	5
Gm49085	0.00114809	-0.025367	0.045	0.099	1	Two-sided Wilcoxon test	0.25	5
Tmem106b	0.00117156	-0.108952	0.407	0.513	1	Two-sided Wilcoxon test	0.25	5
Coq9	0.00117343	-0.0649719	0.241	0.351	1	Two-sided Wilcoxon test	0.25	5
Filip1l	0.00117712	-0.208682	0.547	0.666	1	Two-sided Wilcoxon test	0.25	5
Gtpbp3	0.001178	-0.0671307	0.096	0.169	1	Two-sided Wilcoxon test	0.25	5
Kdm7a	0.00118464	-0.161097	0.457	0.579	1	Two-sided Wilcoxon test	0.25	5
Hspa4	0.00118965	-0.164531	0.909	0.927	1	Two-sided Wilcoxon test	0.25	5
Mvk	0.00119728	-0.0724732	0.24	0.351	1	Two-sided Wilcoxon test	0.25	5
Rps6	0.00120309	-0.135771	0.973	0.957	1	Two-sided Wilcoxon test	0.25	5
Tmeff2	0.00120699	-0.237731	0.087	0.03	1	Two-sided Wilcoxon test	0.25	5
P4ha1	0.00121446	-0.225562	0.655	0.722	1	Two-sided Wilcoxon test	0.25	5
Cog3	0.00121825	-0.132075	0.338	0.444	1	Two-sided Wilcoxon test	0.25	5
March8	0.00122126	-0.113984	0.378	0.497	1	Two-sided Wilcoxon test	0.25	5
Il15ra	0.00122215	-0.0177226	0.027	0.07	1	Two-sided Wilcoxon test	0.25	5
Mycbp	0.00122643	0.14273	0.394	0.311	1	Two-sided Wilcoxon test	0.25	5
Tgds	0.00123239	-0.130928	0.316	0.434	1	Two-sided Wilcoxon test	0.25	5
Creb3l2	0.00123916	-0.246085	0.755	0.798	1	Two-sided Wilcoxon test	0.25	5
Nhlrc3	0.0012428	-0.0316758	0.132	0.215	1	Two-sided Wilcoxon test	0.25	5
Dnhd1	0.00124981	-0.0392773	0.044	0.096	1	Two-sided Wilcoxon test	0.25	5
Sox4	0.00125248	-0.1621	0.788	0.834	1	Two-sided Wilcoxon test	0.25	5
Gab2	0.00125481	-0.174512	0.936	0.95	1	Two-sided Wilcoxon test	0.25	5
2310009B15Rik	0.00126299	0.126361	0.461	0.377	1	Two-sided Wilcoxon test	0.25	5
Coa6	0.00126374	-0.0744366	0.23	0.334	1	Two-sided Wilcoxon test	0.25	5
Mcam	0.00126476	-0.0954578	0.362	0.49	1	Two-sided Wilcoxon test	0.25	5
Nck2	0.00127351	-0.165918	0.606	0.669	1	Two-sided Wilcoxon test	0.25	5
Slc7a6os	0.00127514	-0.0620933	0.26	0.371	1	Two-sided Wilcoxon test	0.25	5
Kctd20	0.00127625	-0.144765	0.467	0.586	1	Two-sided Wilcoxon test	0.25	5
Usp50	0.00127647	-0.122476	0.121	0.199	1	Two-sided Wilcoxon test	0.25	5
Cd1d1	0.0012773	-0.0629738	0.153	0.242	1	Two-sided Wilcoxon test	0.25	5
Ednra	0.00128011	0.0705387	0.133	0.063	1	Two-sided Wilcoxon test	0.25	5
Trmt112	0.00128198	0.173909	0.764	0.692	1	Two-sided Wilcoxon test	0.25	5
Rock1	0.00129461	-0.202071	0.884	0.904	1	Two-sided Wilcoxon test	0.25	5
Ctsz	0.00130142	-0.109566	0.621	0.692	1	Two-sided Wilcoxon test	0.25	5
Hectd1	0.00130321	-0.176541	0.87	0.877	1	Two-sided Wilcoxon test	0.25	5
Sema6a	0.00131029	-0.287032	0.507	0.606	1	Two-sided Wilcoxon test	0.25	5
Mbd5	0.00131359	-0.206401	0.852	0.917	1	Two-sided Wilcoxon test	0.25	5
Fbn1	0.00131736	-0.280104	0.884	0.871	1	Two-sided Wilcoxon test	0.25	5
Sirt7	0.00132456	-0.0522495	0.225	0.341	1	Two-sided Wilcoxon test	0.25	5
Ccdc85b	0.00132654	-0.159046	0.732	0.742	1	Two-sided Wilcoxon test	0.25	5
Ppp4r3b	0.00133715	-0.156872	0.774	0.825	1	Two-sided Wilcoxon test	0.25	5
D130040H23Rik	0.00136569	-0.14072	0.224	0.321	1	Two-sided Wilcoxon test	0.25	5
Abca3	0.00136971	-0.112352	0.217	0.315	1	Two-sided Wilcoxon test	0.25	5
Cct8	0.00137037	0.151337	0.912	0.887	1	Two-sided Wilcoxon test	0.25	5
Eef2kmt	0.00137903	-0.0488537	0.197	0.295	1	Two-sided Wilcoxon test	0.25	5
Nav2	0.00137965	0.0971817	0.144	0.073	1	Two-sided Wilcoxon test	0.25	5
Mrpl23	0.00138769	0.143277	0.538	0.467	1	Two-sided Wilcoxon test	0.25	5
Snrpc	0.00139032	0.175339	0.856	0.798	1	Two-sided Wilcoxon test	0.25	5
Nfkbil1	0.00139296	-0.0717585	0.318	0.434	1	Two-sided Wilcoxon test	0.25	5
Fstl1	0.00139399	-0.225219	0.889	0.911	1	Two-sided Wilcoxon test	0.25	5
Mrpl55	0.00139427	0.114139	0.522	0.457	1	Two-sided Wilcoxon test	0.25	5
Rere	0.0013966	-0.213466	0.948	0.967	1	Two-sided Wilcoxon test	0.25	5
Bnip2	0.00140428	-0.117147	0.8	0.825	1	Two-sided Wilcoxon test	0.25	5
Ywhah	0.00141465	0.163695	0.838	0.791	1	Two-sided Wilcoxon test	0.25	5
Mt2	0.00141709	0.101426	0.123	0.056	1	Two-sided Wilcoxon test	0.25	5
Slc25a21	0.00142003	0.118105	0.059	0.013	1	Two-sided Wilcoxon test	0.25	5
Tmtc3	0.00142123	-0.137491	0.35	0.464	1	Two-sided Wilcoxon test	0.25	5
2810403D21Rik	0.00142484	-0.150308	0.178	0.265	1	Two-sided Wilcoxon test	0.25	5
Rpl38	0.00142741	0.148428	0.94	0.917	1	Two-sided Wilcoxon test	0.25	5
Gm43569	0.00142807	-0.0754849	0.088	0.159	1	Two-sided Wilcoxon test	0.25	5
Ypel2	0.00142812	-0.186403	0.422	0.526	1	Two-sided Wilcoxon test	0.25	5
Gm41764	0.00142868	-0.0528337	0.053	0.109	1	Two-sided Wilcoxon test	0.25	5
Clec14a	0.00144201	-0.212235	0.418	0.526	1	Two-sided Wilcoxon test	0.25	5
Rin1	0.00144383	-0.0261504	0.033	0.079	1	Two-sided Wilcoxon test	0.25	5
Snx3	0.00144714	-0.166536	0.846	0.838	1	Two-sided Wilcoxon test	0.25	5
Daglb	0.00147364	-0.0644812	0.111	0.189	1	Two-sided Wilcoxon test	0.25	5
Calcrl	0.00149205	-0.358287	0.924	0.917	1	Two-sided Wilcoxon test	0.25	5
Abhd17b	0.00150467	-0.202137	0.648	0.738	1	Two-sided Wilcoxon test	0.25	5
Mki67	0.00150679	0.0912017	0.566	0.444	1	Two-sided Wilcoxon test	0.25	5
Tmsb4x	0.00151159	0.229546	0.999	0.997	1	Two-sided Wilcoxon test	0.25	5
Rpl7a	0.00151714	-0.134199	0.94	0.954	1	Two-sided Wilcoxon test	0.25	5
Lmtk2	0.00153137	-0.160309	0.631	0.709	1	Two-sided Wilcoxon test	0.25	5
Zfp706	0.00155085	0.153093	0.794	0.742	1	Two-sided Wilcoxon test	0.25	5
Fam129b	0.00157281	-0.0648841	0.306	0.417	1	Two-sided Wilcoxon test	0.25	5
Cmtm7	0.00157356	-0.107602	0.346	0.457	1	Two-sided Wilcoxon test	0.25	5
Lrrc19	0.00157547	-0.0593163	0.021	0.06	1	Two-sided Wilcoxon test	0.25	5
Elmo1	0.00158114	-0.206044	0.92	0.934	1	Two-sided Wilcoxon test	0.25	5
Mcm7	0.00158513	0.197358	0.692	0.639	1	Two-sided Wilcoxon test	0.25	5
Fbxo4	0.00158982	-0.0806299	0.132	0.212	1	Two-sided Wilcoxon test	0.25	5
2610507I01Rik	0.00159499	-0.0523744	0.057	0.113	1	Two-sided Wilcoxon test	0.25	5
Vim	0.001618	-0.219929	0.977	0.974	1	Two-sided Wilcoxon test	0.25	5
Mkln1	0.00164007	-0.145989	0.843	0.877	1	Two-sided Wilcoxon test	0.25	5
Psmg4	0.00164145	0.153867	0.509	0.457	1	Two-sided Wilcoxon test	0.25	5
Rasa1	0.00165143	-0.182056	0.796	0.841	1	Two-sided Wilcoxon test	0.25	5
Hmgn1	0.00165274	0.140068	0.917	0.907	1	Two-sided Wilcoxon test	0.25	5
Igfbp3	0.00165474	-0.201844	0.328	0.427	1	Two-sided Wilcoxon test	0.25	5
Ubn2	0.00166431	-0.172973	0.756	0.841	1	Two-sided Wilcoxon test	0.25	5
Tef	0.00166989	-0.0392555	0.124	0.202	1	Two-sided Wilcoxon test	0.25	5
Lhfp	0.00167026	0.247933	0.83	0.778	1	Two-sided Wilcoxon test	0.25	5
R3hdm1	0.00167164	-0.163168	0.83	0.884	1	Two-sided Wilcoxon test	0.25	5
Pycard	0.00167233	-0.0711001	0.369	0.483	1	Two-sided Wilcoxon test	0.25	5
B4galt7	0.00167373	-0.0933487	0.202	0.295	1	Two-sided Wilcoxon test	0.25	5
Hykk	0.0016898	-0.0903619	0.087	0.152	1	Two-sided Wilcoxon test	0.25	5
Cflar	0.00170851	-0.103279	0.515	0.639	1	Two-sided Wilcoxon test	0.25	5
Gm47664	0.00172135	-0.0655199	0.08	0.146	1	Two-sided Wilcoxon test	0.25	5
Cyyr1	0.00172452	-0.267213	0.615	0.652	1	Two-sided Wilcoxon test	0.25	5
Cd9	0.00172702	-0.1871	0.581	0.642	1	Two-sided Wilcoxon test	0.25	5
AI987944	0.0017292	-0.0437608	0.079	0.142	1	Two-sided Wilcoxon test	0.25	5
Iffo1	0.00173168	-0.0482831	0.064	0.123	1	Two-sided Wilcoxon test	0.25	5
Disc1	0.0017376	-0.114605	0.354	0.454	1	Two-sided Wilcoxon test	0.25	5
Mzt1	0.00174285	-0.147067	0.501	0.609	1	Two-sided Wilcoxon test	0.25	5
Cmtm8	0.00174332	-0.0971525	0.443	0.533	1	Two-sided Wilcoxon test	0.25	5
5430427M07Rik	0.00174712	-0.0639021	0.039	0.086	1	Two-sided Wilcoxon test	0.25	5
Uhmk1	0.00178385	-0.0817546	0.35	0.467	1	Two-sided Wilcoxon test	0.25	5
Fat3	0.00178419	0.037196	0.144	0.073	1	Two-sided Wilcoxon test	0.25	5
Col4a2	0.0017998	-0.145411	0.948	0.964	1	Two-sided Wilcoxon test	0.25	5
Mdk	0.00180544	0.16245	0.937	0.921	1	Two-sided Wilcoxon test	0.25	5
Tmbim1	0.0018194	-0.0923681	0.254	0.361	1	Two-sided Wilcoxon test	0.25	5
Rhbdf1	0.00182175	-0.0815953	0.158	0.242	1	Two-sided Wilcoxon test	0.25	5
Uvrag	0.00182272	-0.177115	0.767	0.811	1	Two-sided Wilcoxon test	0.25	5
Clip1	0.00183231	-0.200176	0.626	0.722	1	Two-sided Wilcoxon test	0.25	5
Adam22	0.00183581	0.0870045	0.107	0.046	1	Two-sided Wilcoxon test	0.25	5
Evi5	0.00184312	-0.181126	0.783	0.821	1	Two-sided Wilcoxon test	0.25	5
Hpgds	0.0018464	-0.102682	0.039	0.086	1	Two-sided Wilcoxon test	0.25	5
Coq8b	0.00185334	-0.0379988	0.119	0.195	1	Two-sided Wilcoxon test	0.25	5
Tjp1	0.00185656	-0.228475	0.893	0.917	1	Two-sided Wilcoxon test	0.25	5
Gm20404	0.00185791	-0.0189793	0.056	0.113	1	Two-sided Wilcoxon test	0.25	5
Ccser2	0.0018622	-0.151556	0.529	0.646	1	Two-sided Wilcoxon test	0.25	5
Gm12353	0.00186526	-0.0676648	0.12	0.199	1	Two-sided Wilcoxon test	0.25	5
Washc4	0.00187209	-0.191246	0.57	0.646	1	Two-sided Wilcoxon test	0.25	5
Carf	0.00187236	-0.0666572	0.137	0.215	1	Two-sided Wilcoxon test	0.25	5
Vps13b	0.00187296	-0.140865	0.794	0.834	1	Two-sided Wilcoxon test	0.25	5
Ephb4	0.00187484	-0.112881	0.531	0.636	1	Two-sided Wilcoxon test	0.25	5
Mdm4	0.00187607	-0.15679	0.597	0.712	1	Two-sided Wilcoxon test	0.25	5
Stard9	0.00188342	-0.167554	0.26	0.354	1	Two-sided Wilcoxon test	0.25	5
Serpinb6a	0.00188797	-0.107207	0.43	0.536	1	Two-sided Wilcoxon test	0.25	5
1810026B05Rik	0.00189221	-0.163821	0.603	0.709	1	Two-sided Wilcoxon test	0.25	5
Mndal	0.00189617	0.0692317	0.128	0.063	1	Two-sided Wilcoxon test	0.25	5
Arhgef10	0.00190244	-0.122766	0.382	0.493	1	Two-sided Wilcoxon test	0.25	5
Phkb	0.00190788	-0.241786	0.667	0.738	1	Two-sided Wilcoxon test	0.25	5
Rec114	0.00192046	-0.0558783	0.039	0.086	1	Two-sided Wilcoxon test	0.25	5
Pdk4	0.00192883	-0.0211135	0.028	0.07	1	Two-sided Wilcoxon test	0.25	5
Acot1	0.00193679	-0.102124	0.145	0.222	1	Two-sided Wilcoxon test	0.25	5
Efcc1	0.00194446	-0.0279786	0.02	0.056	1	Two-sided Wilcoxon test	0.25	5
Cdc14a	0.00194499	-0.173743	0.549	0.642	1	Two-sided Wilcoxon test	0.25	5
BC003965	0.0019583	-0.0735325	0.389	0.51	1	Two-sided Wilcoxon test	0.25	5
Alkbh4	0.00196251	-0.0331881	0.059	0.116	1	Two-sided Wilcoxon test	0.25	5
Cnih4	0.00196732	0.155185	0.738	0.669	1	Two-sided Wilcoxon test	0.25	5
Cct6a	0.0019675	0.163238	0.88	0.854	1	Two-sided Wilcoxon test	0.25	5
Laptm4b	0.00197434	-0.183043	0.537	0.629	1	Two-sided Wilcoxon test	0.25	5
Bcl2l11	0.00197616	-0.125643	0.531	0.629	1	Two-sided Wilcoxon test	0.25	5
Inpp4a	0.00197804	-0.0749407	0.128	0.205	1	Two-sided Wilcoxon test	0.25	5
Zfp715	0.00199178	-0.0894357	0.153	0.238	1	Two-sided Wilcoxon test	0.25	5
Pln	0.00200693	-0.10404	0.084	0.149	1	Two-sided Wilcoxon test	0.25	5
Eif4a2	0.00201644	-0.161824	0.807	0.848	1	Two-sided Wilcoxon test	0.25	5
Cab39	0.00203032	-0.175804	0.719	0.805	1	Two-sided Wilcoxon test	0.25	5
Ccnd1	0.00204222	0.182985	0.728	0.675	1	Two-sided Wilcoxon test	0.25	5
Slc2a8	0.00204367	-0.0388964	0.075	0.136	1	Two-sided Wilcoxon test	0.25	5
Churc1	0.00204645	-0.0202897	0.181	0.275	1	Two-sided Wilcoxon test	0.25	5
Notch1	0.00205174	-0.128858	0.802	0.825	1	Two-sided Wilcoxon test	0.25	5
Dcaf6	0.00206878	-0.178707	0.475	0.593	1	Two-sided Wilcoxon test	0.25	5
Abhd16a	0.00208243	-0.0576514	0.26	0.364	1	Two-sided Wilcoxon test	0.25	5
Cdh5	0.00209001	-0.172403	0.913	0.911	1	Two-sided Wilcoxon test	0.25	5
mt-Nd4l	0.00209509	0.166082	0.973	0.937	1	Two-sided Wilcoxon test	0.25	5
Sh3bp5l	0.00210346	-0.0309371	0.069	0.129	1	Two-sided Wilcoxon test	0.25	5
Dtnbp1	0.00210545	-0.112382	0.499	0.613	1	Two-sided Wilcoxon test	0.25	5
Pdxdc1	0.00211742	-0.138301	0.65	0.732	1	Two-sided Wilcoxon test	0.25	5
Stk25	0.00212504	-0.115355	0.551	0.626	1	Two-sided Wilcoxon test	0.25	5
Arhgap31	0.00213583	-0.172697	0.937	0.96	1	Two-sided Wilcoxon test	0.25	5
Pbdc1	0.00213728	0.117656	0.699	0.616	1	Two-sided Wilcoxon test	0.25	5
Scand1	0.00213948	0.192308	0.736	0.705	1	Two-sided Wilcoxon test	0.25	5
Per2	0.00216176	-0.0768962	0.137	0.215	1	Two-sided Wilcoxon test	0.25	5
Ahr	0.00216321	-0.0918371	0.174	0.258	1	Two-sided Wilcoxon test	0.25	5
Adgrl4	0.00218297	-0.20006	0.606	0.702	1	Two-sided Wilcoxon test	0.25	5
Ier5	0.0021894	-0.0932815	0.221	0.315	1	Two-sided Wilcoxon test	0.25	5
Dennd2c	0.00219163	-0.0976331	0.2	0.288	1	Two-sided Wilcoxon test	0.25	5
Kdm4c	0.0022122	-0.208911	0.565	0.646	1	Two-sided Wilcoxon test	0.25	5
Myo1b	0.00221864	-0.17387	0.868	0.914	1	Two-sided Wilcoxon test	0.25	5
Spryd4	0.00222244	-0.0545633	0.17	0.255	1	Two-sided Wilcoxon test	0.25	5
Aebp1	0.00223604	0.0560918	0.145	0.076	1	Two-sided Wilcoxon test	0.25	5
Nipbl	0.00224714	-0.15153	0.905	0.924	1	Two-sided Wilcoxon test	0.25	5
Zranb1	0.00226991	-0.169879	0.625	0.712	1	Two-sided Wilcoxon test	0.25	5
Trpc3	0.00227098	-0.150142	0.158	0.242	1	Two-sided Wilcoxon test	0.25	5
9430091E24Rik	0.00228033	-0.0688206	0.056	0.109	1	Two-sided Wilcoxon test	0.25	5
Ppp1r16a	0.00228685	-0.0620924	0.065	0.123	1	Two-sided Wilcoxon test	0.25	5
Topbp1	0.00230866	-0.221898	0.708	0.788	1	Two-sided Wilcoxon test	0.25	5
Kif15	0.00232859	0.173879	0.463	0.361	1	Two-sided Wilcoxon test	0.25	5
4930595D18Rik	0.00235335	-0.0681338	0.037	0.083	1	Two-sided Wilcoxon test	0.25	5
Ly96	0.00235547	-0.0393228	0.158	0.242	1	Two-sided Wilcoxon test	0.25	5
Cnot1	0.00235716	-0.170577	0.839	0.891	1	Two-sided Wilcoxon test	0.25	5
Tmem160	0.00235851	0.168858	0.627	0.553	1	Two-sided Wilcoxon test	0.25	5
Dock9	0.00235986	-0.167644	0.782	0.844	1	Two-sided Wilcoxon test	0.25	5
Irf2	0.00236466	-0.160861	0.579	0.669	1	Two-sided Wilcoxon test	0.25	5
Gm47350	0.00240278	-0.0749629	0.031	0.073	1	Two-sided Wilcoxon test	0.25	5
Pdss2	0.00240454	-0.164376	0.545	0.619	1	Two-sided Wilcoxon test	0.25	5
Timm23	0.00241242	-0.119564	0.84	0.851	1	Two-sided Wilcoxon test	0.25	5
Dtna	0.00243083	0.0519526	0.06	0.017	1	Two-sided Wilcoxon test	0.25	5
Map3k11	0.0024626	-0.0607746	0.25	0.354	1	Two-sided Wilcoxon test	0.25	5
Arl6ip5	0.00246463	-0.107238	0.502	0.609	1	Two-sided Wilcoxon test	0.25	5
C730034F03Rik	0.00246985	-0.0266659	0.031	0.073	1	Two-sided Wilcoxon test	0.25	5
Cry1	0.00247759	-0.141331	0.387	0.477	1	Two-sided Wilcoxon test	0.25	5
Rfxank	0.00249338	-0.0299304	0.123	0.199	1	Two-sided Wilcoxon test	0.25	5
Skil	0.00249406	-0.21166	0.632	0.709	1	Two-sided Wilcoxon test	0.25	5
Ubxn1	0.00250476	0.169249	0.827	0.775	1	Two-sided Wilcoxon test	0.25	5
Ap3s1	0.00252042	0.149575	0.659	0.576	1	Two-sided Wilcoxon test	0.25	5
Rpl6	0.00254	-0.108433	0.979	0.993	1	Two-sided Wilcoxon test	0.25	5
Mmp14	0.0025437	-0.176877	0.691	0.732	1	Two-sided Wilcoxon test	0.25	5
Sfi1	0.00254506	-0.0733326	0.196	0.288	1	Two-sided Wilcoxon test	0.25	5
Rnf169	0.0025568	-0.15716	0.591	0.675	1	Two-sided Wilcoxon test	0.25	5
Cebpz	0.00255703	0.13557	0.599	0.563	1	Two-sided Wilcoxon test	0.25	5
C1qbp	0.00256275	0.172123	0.82	0.798	1	Two-sided Wilcoxon test	0.25	5
Lrrc57	0.00257142	-0.0314342	0.129	0.205	1	Two-sided Wilcoxon test	0.25	5
Isca1	0.00257452	-0.0661967	0.379	0.51	1	Two-sided Wilcoxon test	0.25	5
Cenpt	0.00257806	-0.127919	0.288	0.377	1	Two-sided Wilcoxon test	0.25	5
Zfp524	0.00258827	-0.0237278	0.06	0.116	1	Two-sided Wilcoxon test	0.25	5
Psph	0.00259542	-0.0609978	0.2	0.295	1	Two-sided Wilcoxon test	0.25	5
Stx16	0.00260881	-0.150454	0.539	0.659	1	Two-sided Wilcoxon test	0.25	5
Dynlrb1	0.00262226	0.154715	0.842	0.785	1	Two-sided Wilcoxon test	0.25	5
Lsamp	0.00263664	0.411581	0.2	0.123	1	Two-sided Wilcoxon test	0.25	5
Cd109	0.00265771	-0.0890481	0.113	0.182	1	Two-sided Wilcoxon test	0.25	5
A930015D03Rik	0.0026628	-0.0394495	0.2	0.295	1	Two-sided Wilcoxon test	0.25	5
0610009E02Rik	0.00266495	0.0049461	0.099	0.172	1	Two-sided Wilcoxon test	0.25	5
Ifitm3	0.00267239	0.219568	0.578	0.523	1	Two-sided Wilcoxon test	0.25	5
Tmem170	0.00267788	-0.0526595	0.063	0.119	1	Two-sided Wilcoxon test	0.25	5
Ptk2	0.00267965	-0.168207	0.957	0.96	1	Two-sided Wilcoxon test	0.25	5
Ufl1	0.00268252	-0.0959434	0.55	0.646	1	Two-sided Wilcoxon test	0.25	5
Cyb5d1	0.00268556	-0.0260472	0.06	0.116	1	Two-sided Wilcoxon test	0.25	5
Oxld1	0.00272181	-0.0246012	0.069	0.129	1	Two-sided Wilcoxon test	0.25	5
Dnajb2	0.00272304	-0.0864759	0.093	0.159	1	Two-sided Wilcoxon test	0.25	5
Phf20l1	0.00272526	-0.137195	0.795	0.854	1	Two-sided Wilcoxon test	0.25	5
Ogdh	0.00272721	0.157643	0.64	0.583	1	Two-sided Wilcoxon test	0.25	5
Crlf2	0.00273005	-0.0439903	0.121	0.195	1	Two-sided Wilcoxon test	0.25	5
Fam163a	0.00275098	-0.101003	0.16	0.242	1	Two-sided Wilcoxon test	0.25	5
Med29	0.00275954	0.115086	0.594	0.546	1	Two-sided Wilcoxon test	0.25	5
Hnrnpdl	0.0027614	0.116886	0.856	0.854	1	Two-sided Wilcoxon test	0.25	5
Stt3b	0.00276169	-0.160079	0.819	0.851	1	Two-sided Wilcoxon test	0.25	5
Cttnbp2	0.00278719	-0.11562	0.382	0.487	1	Two-sided Wilcoxon test	0.25	5
C430049B03Rik	0.00278864	-0.221558	0.656	0.752	1	Two-sided Wilcoxon test	0.25	5
Kctd13	0.00280571	-0.0706304	0.137	0.209	1	Two-sided Wilcoxon test	0.25	5
2310039H08Rik	0.00280956	0.133576	0.403	0.334	1	Two-sided Wilcoxon test	0.25	5
Rhobtb1	0.0028177	-0.111278	0.266	0.364	1	Two-sided Wilcoxon test	0.25	5
Naca	0.00281972	0.116347	0.977	0.967	1	Two-sided Wilcoxon test	0.25	5
Mpv17	0.0028291	-0.059446	0.202	0.288	1	Two-sided Wilcoxon test	0.25	5
Dync1h1	0.00284246	-0.164511	0.839	0.854	1	Two-sided Wilcoxon test	0.25	5
Dusp4	0.00286317	-0.0846356	0.325	0.43	1	Two-sided Wilcoxon test	0.25	5
Camsap2	0.00287896	-0.143626	0.581	0.709	1	Two-sided Wilcoxon test	0.25	5
Ecscr	0.00288633	-0.129254	0.802	0.781	1	Two-sided Wilcoxon test	0.25	5
Rsf1os2	0.00291819	-0.120167	0.073	0.132	1	Two-sided Wilcoxon test	0.25	5
Magi3	0.00292569	-0.141517	0.864	0.894	1	Two-sided Wilcoxon test	0.25	5
Epop	0.0029356	-0.0155231	0.083	0.146	1	Two-sided Wilcoxon test	0.25	5
BC031181	0.00295092	-0.102396	0.478	0.57	1	Two-sided Wilcoxon test	0.25	5
E230016M11Rik	0.00296671	-0.0424087	0.121	0.195	1	Two-sided Wilcoxon test	0.25	5
Agk	0.00298361	-0.0622069	0.356	0.464	1	Two-sided Wilcoxon test	0.25	5
Slc43a1	0.00299248	-0.0631863	0.204	0.295	1	Two-sided Wilcoxon test	0.25	5
Dnmt1	0.00300936	0.177695	0.76	0.735	1	Two-sided Wilcoxon test	0.25	5
Zfp990	0.00301058	-0.0269451	0.099	0.166	1	Two-sided Wilcoxon test	0.25	5
Ssrp1	0.0030146	0.126415	0.816	0.775	1	Two-sided Wilcoxon test	0.25	5
Acadsb	0.00301658	-0.0875913	0.378	0.483	1	Two-sided Wilcoxon test	0.25	5
Fgd6	0.00302529	-0.112623	0.419	0.523	1	Two-sided Wilcoxon test	0.25	5
Mon1a	0.00306684	-0.0336059	0.061	0.116	1	Two-sided Wilcoxon test	0.25	5
Tcf7	0.00307687	0.0405529	0.093	0.04	1	Two-sided Wilcoxon test	0.25	5
9130019P16Rik	0.00307749	-0.134282	0.075	0.132	1	Two-sided Wilcoxon test	0.25	5
B2m	0.00309127	-0.0991226	0.625	0.692	1	Two-sided Wilcoxon test	0.25	5
mt-Co2	0.00309159	-0.239122	1	1	1	Two-sided Wilcoxon test	0.25	5
Gm9828	0.00309387	-0.0501588	0.052	0.103	1	Two-sided Wilcoxon test	0.25	5
Ptpra	0.00310779	-0.119572	0.69	0.748	1	Two-sided Wilcoxon test	0.25	5
Timm13	0.00311724	0.174991	0.766	0.735	1	Two-sided Wilcoxon test	0.25	5
H2afv	0.00312015	0.158731	0.876	0.841	1	Two-sided Wilcoxon test	0.25	5
U2af1	0.00313411	0.114082	0.883	0.858	1	Two-sided Wilcoxon test	0.25	5
Ank1	0.00316573	0.0601877	0.053	0.013	1	Two-sided Wilcoxon test	0.25	5
Lyn	0.00319233	-0.207458	0.593	0.656	1	Two-sided Wilcoxon test	0.25	5
Zeb1	0.00319916	-0.129309	0.927	0.934	1	Two-sided Wilcoxon test	0.25	5
Dnaja4	0.00320143	-0.0340505	0.021	0.056	1	Two-sided Wilcoxon test	0.25	5
Ints10	0.00321385	-0.115169	0.362	0.467	1	Two-sided Wilcoxon test	0.25	5
Erlec1	0.00321666	-0.12665	0.511	0.603	1	Two-sided Wilcoxon test	0.25	5
Rabgap1	0.00323023	-0.153859	0.752	0.805	1	Two-sided Wilcoxon test	0.25	5
Dhcr7	0.00323488	-0.0439987	0.174	0.265	1	Two-sided Wilcoxon test	0.25	5
Cdk4	0.00323794	0.145878	0.887	0.841	1	Two-sided Wilcoxon test	0.25	5
Brat1	0.00324731	-0.0463091	0.068	0.126	1	Two-sided Wilcoxon test	0.25	5
Mapre1	0.0032518	0.138973	0.847	0.785	1	Two-sided Wilcoxon test	0.25	5
Btg1	0.00325757	-0.133379	0.783	0.818	1	Two-sided Wilcoxon test	0.25	5
Rad23b	0.00327746	0.104704	0.808	0.748	1	Two-sided Wilcoxon test	0.25	5
Ndufb5	0.00328563	0.127101	0.871	0.811	1	Two-sided Wilcoxon test	0.25	5
Sh3gl1	0.00329782	-0.100061	0.517	0.626	1	Two-sided Wilcoxon test	0.25	5
Gmcl1	0.00329928	-0.0713821	0.254	0.351	1	Two-sided Wilcoxon test	0.25	5
Hist1h3a	0.00330292	0.0348357	0.059	0.017	1	Two-sided Wilcoxon test	0.25	5
Pde2a	0.00330519	-0.0493939	0.208	0.301	1	Two-sided Wilcoxon test	0.25	5
Rnf121	0.00335387	-0.121055	0.341	0.44	1	Two-sided Wilcoxon test	0.25	5
Ctc1	0.00338707	-0.122132	0.309	0.411	1	Two-sided Wilcoxon test	0.25	5
Dok6	0.00339025	0.0881237	0.069	0.023	1	Two-sided Wilcoxon test	0.25	5
Gigyf1	0.00339329	-0.0535177	0.2	0.288	1	Two-sided Wilcoxon test	0.25	5
Hspa12b	0.00344105	-0.0412388	0.241	0.338	1	Two-sided Wilcoxon test	0.25	5
Xiap	0.0034666	-0.156618	0.666	0.735	1	Two-sided Wilcoxon test	0.25	5
Gfm1	0.00347472	-0.0796766	0.33	0.434	1	Two-sided Wilcoxon test	0.25	5
Chuk	0.00350158	-0.131388	0.445	0.546	1	Two-sided Wilcoxon test	0.25	5
Itm2c	0.00350261	-0.0889571	0.648	0.705	1	Two-sided Wilcoxon test	0.25	5
Trim8	0.00351042	-0.0733238	0.322	0.43	1	Two-sided Wilcoxon test	0.25	5
Ppp4r3a	0.00356378	-0.186773	0.754	0.818	1	Two-sided Wilcoxon test	0.25	5
Zfp395	0.00356547	-0.0807729	0.278	0.374	1	Two-sided Wilcoxon test	0.25	5
Tnfrsf1a	0.00361656	-0.0418601	0.33	0.454	1	Two-sided Wilcoxon test	0.25	5
mt-Nd6	0.00361886	-0.391544	0.78	0.841	1	Two-sided Wilcoxon test	0.25	5
Cmtm6	0.00362109	-0.0284616	0.31	0.434	1	Two-sided Wilcoxon test	0.25	5
Nfrkb	0.00362694	-0.0645109	0.329	0.43	1	Two-sided Wilcoxon test	0.25	5
Fam210a	0.00363244	-0.0697436	0.298	0.407	1	Two-sided Wilcoxon test	0.25	5
Leprot	0.00364247	-0.0947098	0.609	0.689	1	Two-sided Wilcoxon test	0.25	5
Atl1	0.0036432	-0.0520787	0.157	0.242	1	Two-sided Wilcoxon test	0.25	5
1110038B12Rik	0.0036434	0.14894	0.614	0.576	1	Two-sided Wilcoxon test	0.25	5
Rilpl2	0.00367012	-0.0704028	0.232	0.321	1	Two-sided Wilcoxon test	0.25	5
Rabgef1	0.0036705	0.161423	0.662	0.609	1	Two-sided Wilcoxon test	0.25	5
Sertad3	0.00367281	-0.0366015	0.141	0.222	1	Two-sided Wilcoxon test	0.25	5
Hscb	0.00367575	-0.0428373	0.174	0.258	1	Two-sided Wilcoxon test	0.25	5
Lrrc8b	0.00369653	-0.122113	0.501	0.586	1	Two-sided Wilcoxon test	0.25	5
Clip3	0.00370894	0.053659	0.115	0.056	1	Two-sided Wilcoxon test	0.25	5
Ddx39b	0.00371202	0.118625	0.891	0.877	1	Two-sided Wilcoxon test	0.25	5
Gulp1	0.00371966	-0.214134	0.735	0.775	1	Two-sided Wilcoxon test	0.25	5
Mmp15	0.00372139	-0.0676745	0.288	0.394	1	Two-sided Wilcoxon test	0.25	5
Eif3h	0.00372872	-0.102621	0.884	0.877	1	Two-sided Wilcoxon test	0.25	5
Gm14305	0.00372969	-0.0325708	0.109	0.179	1	Two-sided Wilcoxon test	0.25	5
Thbs3	0.00374148	-0.0351261	0.08	0.139	1	Two-sided Wilcoxon test	0.25	5
Nbea	0.00375959	-0.166645	0.858	0.887	1	Two-sided Wilcoxon test	0.25	5
Nxpe2	0.00376715	-0.0668064	0.051	0.099	1	Two-sided Wilcoxon test	0.25	5
Afdn	0.00376738	-0.119254	0.842	0.881	1	Two-sided Wilcoxon test	0.25	5
Clec1a	0.00377396	-0.0564454	0.059	0.109	1	Two-sided Wilcoxon test	0.25	5
Gm15265	0.00379486	-0.0103529	0.067	0.123	1	Two-sided Wilcoxon test	0.25	5
Banf1	0.00380124	0.153302	0.832	0.785	1	Two-sided Wilcoxon test	0.25	5
Armcx6	0.00383153	-0.0627719	0.208	0.295	1	Two-sided Wilcoxon test	0.25	5
Lmbrd1	0.00383905	-0.0785397	0.419	0.546	1	Two-sided Wilcoxon test	0.25	5
Wdr89	0.00385034	0.134136	0.405	0.348	1	Two-sided Wilcoxon test	0.25	5
Ripk3	0.00385964	-0.0501021	0.244	0.334	1	Two-sided Wilcoxon test	0.25	5
Zfp65	0.00386038	-0.0468383	0.142	0.219	1	Two-sided Wilcoxon test	0.25	5
Acta2	0.00388014	0.168013	0.493	0.397	1	Two-sided Wilcoxon test	0.25	5
Sirt5	0.00388778	-0.0603094	0.107	0.172	1	Two-sided Wilcoxon test	0.25	5
Scrib	0.00389396	-0.0706622	0.194	0.281	1	Two-sided Wilcoxon test	0.25	5
Plp2	0.00390674	-0.0765197	0.372	0.48	1	Two-sided Wilcoxon test	0.25	5
Ttc9	0.00390715	-0.0425215	0.095	0.159	1	Two-sided Wilcoxon test	0.25	5
Tspyl1	0.00391022	-0.0831042	0.326	0.43	1	Two-sided Wilcoxon test	0.25	5
Yipf4	0.00391272	-0.111688	0.522	0.606	1	Two-sided Wilcoxon test	0.25	5
Sumo2	0.00391696	0.117983	0.947	0.944	1	Two-sided Wilcoxon test	0.25	5
Fam129a	0.00392557	-0.0747579	0.2	0.281	1	Two-sided Wilcoxon test	0.25	5
Slc25a19	0.00393121	-0.0672087	0.1	0.166	1	Two-sided Wilcoxon test	0.25	5
Mbnl2	0.00394175	-0.176254	0.909	0.95	1	Two-sided Wilcoxon test	0.25	5
Ndufaf7	0.00394985	-0.0763169	0.258	0.354	1	Two-sided Wilcoxon test	0.25	5
Nap1l3	0.00397401	-0.0183205	0.039	0.083	1	Two-sided Wilcoxon test	0.25	5
Lifr	0.00397694	-0.112937	0.39	0.49	1	Two-sided Wilcoxon test	0.25	5
Adipor2	0.00399823	-0.101433	0.495	0.599	1	Two-sided Wilcoxon test	0.25	5
Zcrb1	0.00400163	0.142282	0.784	0.752	1	Two-sided Wilcoxon test	0.25	5
Zfp148	0.0040567	-0.139391	0.843	0.897	1	Two-sided Wilcoxon test	0.25	5
Egfr	0.0040617	0.0134682	0.073	0.026	1	Two-sided Wilcoxon test	0.25	5
Sugp1	0.00407975	-0.0992533	0.261	0.358	1	Two-sided Wilcoxon test	0.25	5
Rps6kc1	0.00408187	-0.0514846	0.23	0.318	1	Two-sided Wilcoxon test	0.25	5
Spaca1	0.00409483	-0.0310246	0.024	0.06	1	Two-sided Wilcoxon test	0.25	5
Acot13	0.00409659	-0.101668	0.288	0.384	1	Two-sided Wilcoxon test	0.25	5
Pcif1	0.00409881	0.114601	0.451	0.377	1	Two-sided Wilcoxon test	0.25	5
Phlda1	0.00410443	0.12007	0.442	0.364	1	Two-sided Wilcoxon test	0.25	5
Pex13	0.00410674	-0.0660764	0.45	0.536	1	Two-sided Wilcoxon test	0.25	5
Melk	0.00411021	0.0891874	0.353	0.258	1	Two-sided Wilcoxon test	0.25	5
Exoc8	0.00412288	-0.0475795	0.125	0.195	1	Two-sided Wilcoxon test	0.25	5
Zfp558	0.00412941	-0.0274105	0.051	0.099	1	Two-sided Wilcoxon test	0.25	5
Tpi1	0.00413289	-0.18956	0.848	0.864	1	Two-sided Wilcoxon test	0.25	5
Smg1	0.00414849	-0.183329	0.768	0.821	1	Two-sided Wilcoxon test	0.25	5
Tpk1	0.00414874	-0.133223	0.403	0.493	1	Two-sided Wilcoxon test	0.25	5
Wdfy2	0.00416107	-0.139893	0.517	0.603	1	Two-sided Wilcoxon test	0.25	5
Zfp788	0.0041646	-0.0418155	0.14	0.215	1	Two-sided Wilcoxon test	0.25	5
Tyw5	0.00416661	-0.100903	0.214	0.298	1	Two-sided Wilcoxon test	0.25	5
Herc3	0.00417298	-0.047289	0.205	0.298	1	Two-sided Wilcoxon test	0.25	5
Lpcat2	0.00418357	-0.108287	0.194	0.268	1	Two-sided Wilcoxon test	0.25	5
Map2k1	0.00418698	-0.12228	0.43	0.54	1	Two-sided Wilcoxon test	0.25	5
Brca1	0.00419154	0.120881	0.447	0.358	1	Two-sided Wilcoxon test	0.25	5
Aff4	0.00419957	-0.168059	0.897	0.927	1	Two-sided Wilcoxon test	0.25	5
Tnfaip3	0.00421865	-0.0198392	0.048	0.096	1	Two-sided Wilcoxon test	0.25	5
Tsen54	0.00422154	-0.0376224	0.085	0.146	1	Two-sided Wilcoxon test	0.25	5
Eri3	0.00423829	-0.170644	0.595	0.702	1	Two-sided Wilcoxon test	0.25	5
Parp1	0.00429696	0.162746	0.723	0.656	1	Two-sided Wilcoxon test	0.25	5
Tmem132c	0.00429883	0.117653	0.087	0.036	1	Two-sided Wilcoxon test	0.25	5
Taldo1	0.00430168	0.158111	0.818	0.772	1	Two-sided Wilcoxon test	0.25	5
Ablim1	0.00430251	-0.177541	0.569	0.649	1	Two-sided Wilcoxon test	0.25	5
Ppp1r12b	0.0043035	-0.235333	0.51	0.593	1	Two-sided Wilcoxon test	0.25	5
Tmbim6	0.00430719	-0.103503	0.815	0.831	1	Two-sided Wilcoxon test	0.25	5
Gm42439	0.00431011	-0.131688	0.197	0.278	1	Two-sided Wilcoxon test	0.25	5
Adam9	0.00431369	-0.128212	0.165	0.242	1	Two-sided Wilcoxon test	0.25	5
Rhob	0.00431868	0.211853	0.743	0.725	1	Two-sided Wilcoxon test	0.25	5
Klhl24	0.00432159	-0.112185	0.577	0.666	1	Two-sided Wilcoxon test	0.25	5
Srcap	0.00437152	-0.126429	0.595	0.675	1	Two-sided Wilcoxon test	0.25	5
Fam111a	0.00437972	0.199281	0.561	0.503	1	Two-sided Wilcoxon test	0.25	5
Tasor2	0.00439651	-0.206011	0.667	0.765	1	Two-sided Wilcoxon test	0.25	5
Atp6v1e1	0.00442033	-0.0904614	0.664	0.735	1	Two-sided Wilcoxon test	0.25	5
Bod1l	0.00442577	-0.183228	0.7	0.768	1	Two-sided Wilcoxon test	0.25	5
Nucb1	0.00442783	-0.191521	0.628	0.672	1	Two-sided Wilcoxon test	0.25	5
Gm20457	0.00442784	-0.0239836	0.02	0.053	1	Two-sided Wilcoxon test	0.25	5
Mecomos	0.00442958	-0.0976962	0.059	0.109	1	Two-sided Wilcoxon test	0.25	5
AC149090.1	0.00446195	-0.128021	0.174	0.255	1	Two-sided Wilcoxon test	0.25	5
Ralgds	0.00447057	-0.0568551	0.234	0.325	1	Two-sided Wilcoxon test	0.25	5
Rilpl1	0.00448779	-0.0560321	0.369	0.48	1	Two-sided Wilcoxon test	0.25	5
2410006H16Rik	0.0044993	0.155101	0.687	0.639	1	Two-sided Wilcoxon test	0.25	5
Zfp58	0.00452486	-0.0714792	0.077	0.132	1	Two-sided Wilcoxon test	0.25	5
Acvr2b	0.00453529	-0.0387013	0.254	0.351	1	Two-sided Wilcoxon test	0.25	5
Dram2	0.00455288	-0.0922613	0.514	0.636	1	Two-sided Wilcoxon test	0.25	5
Maged2	0.00458753	0.184207	0.904	0.881	1	Two-sided Wilcoxon test	0.25	5
Ap3m2	0.00459915	-0.0318888	0.157	0.235	1	Two-sided Wilcoxon test	0.25	5
Zdhhc20	0.00460035	-0.175952	0.802	0.844	1	Two-sided Wilcoxon test	0.25	5
Znrd1as	0.00462703	-0.0123512	0.071	0.129	1	Two-sided Wilcoxon test	0.25	5
Mrpl53	0.00463559	0.134393	0.738	0.685	1	Two-sided Wilcoxon test	0.25	5
Csnk1a1	0.00464243	-0.099777	0.948	0.95	1	Two-sided Wilcoxon test	0.25	5
Tab3	0.00464376	-0.153982	0.297	0.391	1	Two-sided Wilcoxon test	0.25	5
Tmem147	0.00465704	0.11605	0.699	0.636	1	Two-sided Wilcoxon test	0.25	5
Snx20	0.00466758	-0.0169807	0.02	0.053	1	Two-sided Wilcoxon test	0.25	5
Fkbp10	0.0046729	-0.113631	0.541	0.632	1	Two-sided Wilcoxon test	0.25	5
Nbeal1	0.00467291	-0.112613	0.628	0.719	1	Two-sided Wilcoxon test	0.25	5
Slc7a7	0.00468068	-0.0620337	0.138	0.212	1	Two-sided Wilcoxon test	0.25	5
Anapc11	0.00471542	0.11625	0.707	0.672	1	Two-sided Wilcoxon test	0.25	5
Pkn1	0.00472378	-0.13857	0.461	0.556	1	Two-sided Wilcoxon test	0.25	5
Rrbp1	0.00475778	0.111187	0.944	0.911	1	Two-sided Wilcoxon test	0.25	5
Cavin1	0.00479371	-0.153076	0.457	0.523	1	Two-sided Wilcoxon test	0.25	5
Gm14164	0.00479842	0.0552317	0.119	0.063	1	Two-sided Wilcoxon test	0.25	5
Gm16794	0.00480034	-0.0695409	0.04	0.083	1	Two-sided Wilcoxon test	0.25	5
Acvr1b	0.00480596	-0.0681434	0.133	0.202	1	Two-sided Wilcoxon test	0.25	5
Tbcc	0.00483464	-0.0811182	0.249	0.338	1	Two-sided Wilcoxon test	0.25	5
AC154200.1	0.00486019	0.0373343	0.051	0.013	1	Two-sided Wilcoxon test	0.25	5
Gm41790	0.00487147	0.0301396	0.056	0.017	1	Two-sided Wilcoxon test	0.25	5
Aacs	0.00487444	-0.0900172	0.201	0.285	1	Two-sided Wilcoxon test	0.25	5
Ptgs1	0.00489833	-0.0633396	0.277	0.371	1	Two-sided Wilcoxon test	0.25	5
C87436	0.00493733	-0.0597152	0.212	0.298	1	Two-sided Wilcoxon test	0.25	5
Gpbp1	0.00493862	-0.130335	0.783	0.838	1	Two-sided Wilcoxon test	0.25	5
Atf4	0.00494071	-0.117235	0.632	0.682	1	Two-sided Wilcoxon test	0.25	5
Usp6nl	0.00494694	-0.181242	0.522	0.613	1	Two-sided Wilcoxon test	0.25	5
Med20	0.00496007	-0.033687	0.301	0.407	1	Two-sided Wilcoxon test	0.25	5
Gm47167	0.00496138	-0.0785278	0.17	0.245	1	Two-sided Wilcoxon test	0.25	5
4932413F04Rik	0.00496916	-0.0467613	0.027	0.063	1	Two-sided Wilcoxon test	0.25	5
Dmtf1	0.00498974	-0.143092	0.509	0.606	1	Two-sided Wilcoxon test	0.25	5
Clic1	0.0049986	-0.104522	0.897	0.894	1	Two-sided Wilcoxon test	0.25	5
Nsmf	0.0050024	-0.0311258	0.13	0.205	1	Two-sided Wilcoxon test	0.25	5
Gpr137c	0.00501288	-0.0595378	0.197	0.281	1	Two-sided Wilcoxon test	0.25	5
Robo2	0.00501868	0.168738	0.165	0.099	1	Two-sided Wilcoxon test	0.25	5
Dennd4c	0.00503297	-0.146607	0.577	0.656	1	Two-sided Wilcoxon test	0.25	5
Thumpd2	0.00503605	-0.0991483	0.256	0.348	1	Two-sided Wilcoxon test	0.25	5
Sdccag8	0.00506239	-0.106299	0.457	0.56	1	Two-sided Wilcoxon test	0.25	5
Nudt13	0.00508331	-0.0397443	0.12	0.192	1	Two-sided Wilcoxon test	0.25	5
Zbtb18	0.00510176	-0.022949	0.14	0.219	1	Two-sided Wilcoxon test	0.25	5
Atf7	0.00510925	-0.130085	0.574	0.666	1	Two-sided Wilcoxon test	0.25	5
Corin	0.00511831	0.094554	0.429	0.328	1	Two-sided Wilcoxon test	0.25	5
Gab3	0.00512732	-0.111488	0.261	0.341	1	Two-sided Wilcoxon test	0.25	5
Nexmif	0.00514453	-0.231809	0.264	0.341	1	Two-sided Wilcoxon test	0.25	5
Cct3	0.00516843	0.154105	0.864	0.848	1	Two-sided Wilcoxon test	0.25	5
Pdlim7	0.00517087	0.114287	0.666	0.632	1	Two-sided Wilcoxon test	0.25	5
Zyx	0.00518092	0.144402	0.615	0.566	1	Two-sided Wilcoxon test	0.25	5
Rlf	0.00522061	-0.120354	0.775	0.821	1	Two-sided Wilcoxon test	0.25	5
Coch	0.00524726	-0.0882581	0.019	0.05	1	Two-sided Wilcoxon test	0.25	5
D430042O09Rik	0.00524829	-0.118551	0.249	0.341	1	Two-sided Wilcoxon test	0.25	5
Gm17106	0.00524893	-0.152754	0.264	0.348	1	Two-sided Wilcoxon test	0.25	5
Mtdh	0.00524929	-0.156918	0.871	0.901	1	Two-sided Wilcoxon test	0.25	5
Slc7a14	0.00529574	0.160885	0.244	0.166	1	Two-sided Wilcoxon test	0.25	5
Nucks1	0.00529615	0.144813	0.843	0.808	1	Two-sided Wilcoxon test	0.25	5
Gm44686	0.00533326	-0.0670465	0.184	0.268	1	Two-sided Wilcoxon test	0.25	5
Trim24	0.00534491	-0.167268	0.81	0.834	1	Two-sided Wilcoxon test	0.25	5
Sema5a	0.00535224	0.136123	0.138	0.076	1	Two-sided Wilcoxon test	0.25	5
Naaladl2	0.00536924	0.0727162	0.214	0.139	1	Two-sided Wilcoxon test	0.25	5
Pot1b	0.00539462	-0.0595814	0.248	0.338	1	Two-sided Wilcoxon test	0.25	5
Rpl13	0.00540368	0.0933537	0.999	1	1	Two-sided Wilcoxon test	0.25	5
Rpp21	0.00542243	0.107333	0.501	0.437	1	Two-sided Wilcoxon test	0.25	5
Lrrc73	0.00542569	-0.0142155	0.041	0.086	1	Two-sided Wilcoxon test	0.25	5
Shld2	0.00542885	-0.114213	0.242	0.328	1	Two-sided Wilcoxon test	0.25	5
Trim35	0.00543257	-0.226092	0.67	0.699	1	Two-sided Wilcoxon test	0.25	5
Ccnb1	0.00544568	0.108702	0.382	0.281	1	Two-sided Wilcoxon test	0.25	5
Mr1	0.00546134	-0.0438592	0.023	0.056	1	Two-sided Wilcoxon test	0.25	5
Senp6	0.00546311	-0.140658	0.895	0.914	1	Two-sided Wilcoxon test	0.25	5
Supt3	0.00547224	-0.194983	0.676	0.735	1	Two-sided Wilcoxon test	0.25	5
Atf3	0.00548835	0.274803	0.589	0.517	1	Two-sided Wilcoxon test	0.25	5
Fam172a	0.00550802	-0.140894	0.867	0.887	1	Two-sided Wilcoxon test	0.25	5
Anp32e	0.00551308	0.131286	0.77	0.719	1	Two-sided Wilcoxon test	0.25	5
Inpp5d	0.00551833	-0.140105	0.365	0.447	1	Two-sided Wilcoxon test	0.25	5
Setd5	0.00552762	-0.149231	0.875	0.901	1	Two-sided Wilcoxon test	0.25	5
Tceanc	0.00553911	-0.0513821	0.06	0.109	1	Two-sided Wilcoxon test	0.25	5
Frem1	0.00557034	-0.433087	0.523	0.576	1	Two-sided Wilcoxon test	0.25	5
Zfp956	0.00558867	-0.0283415	0.036	0.076	1	Two-sided Wilcoxon test	0.25	5
4933400F21Rik	0.00562508	-0.107849	0.053	0.099	1	Two-sided Wilcoxon test	0.25	5
Ndufb10	0.00564318	0.149993	0.714	0.692	1	Two-sided Wilcoxon test	0.25	5
Snip1	0.00564548	-0.0809919	0.249	0.338	1	Two-sided Wilcoxon test	0.25	5
Clk1	0.00567468	-0.155739	0.85	0.868	1	Two-sided Wilcoxon test	0.25	5
Atg13	0.00567513	-0.0910669	0.375	0.474	1	Two-sided Wilcoxon test	0.25	5
Ccdc186	0.00568899	-0.118026	0.531	0.629	1	Two-sided Wilcoxon test	0.25	5
Dctn2	0.00570205	-0.144216	0.7	0.748	1	Two-sided Wilcoxon test	0.25	5
Nfic	0.00570231	-0.132408	0.422	0.523	1	Two-sided Wilcoxon test	0.25	5
Wnt2	0.00570864	0.0401608	0.056	0.017	1	Two-sided Wilcoxon test	0.25	5
Pcdhgc3	0.00572134	-0.0459138	0.217	0.311	1	Two-sided Wilcoxon test	0.25	5
Sptbn1	0.00572628	-0.129416	0.961	0.974	1	Two-sided Wilcoxon test	0.25	5
Timmdc1	0.00573436	-0.0946092	0.333	0.434	1	Two-sided Wilcoxon test	0.25	5
Spout1	0.00573671	-0.0478351	0.222	0.321	1	Two-sided Wilcoxon test	0.25	5
Egfl7	0.00574642	-0.149271	0.899	0.894	1	Two-sided Wilcoxon test	0.25	5
Tmem135	0.00575495	-0.186483	0.672	0.748	1	Two-sided Wilcoxon test	0.25	5
Grpel2	0.00577097	-0.0598233	0.237	0.328	1	Two-sided Wilcoxon test	0.25	5
4933421O10Rik	0.0057737	-0.0592021	0.056	0.103	1	Two-sided Wilcoxon test	0.25	5
Ubb	0.00578449	-0.104553	0.987	0.977	1	Two-sided Wilcoxon test	0.25	5
Ss18l2	0.00578743	0.0740423	0.324	0.242	1	Two-sided Wilcoxon test	0.25	5
Nfat5	0.00578797	-0.205674	0.838	0.854	1	Two-sided Wilcoxon test	0.25	5
Zswim4	0.00578805	-0.0441155	0.242	0.328	1	Two-sided Wilcoxon test	0.25	5
Bloc1s5	0.00579716	-0.048461	0.208	0.298	1	Two-sided Wilcoxon test	0.25	5
5730455P16Rik	0.00582945	-0.0575275	0.277	0.371	1	Two-sided Wilcoxon test	0.25	5
Zfp738	0.00583051	-0.112745	0.178	0.255	1	Two-sided Wilcoxon test	0.25	5
Epn2	0.00583881	-0.135883	0.495	0.589	1	Two-sided Wilcoxon test	0.25	5
Pde1c	0.00586936	-0.218481	0.734	0.788	1	Two-sided Wilcoxon test	0.25	5
Lamtor4	0.0058752	0.0926248	0.632	0.586	1	Two-sided Wilcoxon test	0.25	5
Herc6	0.0058887	-0.0733421	0.218	0.305	1	Two-sided Wilcoxon test	0.25	5
Ipo11	0.00592412	-0.165216	0.811	0.838	1	Two-sided Wilcoxon test	0.25	5
Ift43	0.00592739	0.122571	0.481	0.414	1	Two-sided Wilcoxon test	0.25	5
Tspan9	0.00595277	-0.133989	0.78	0.811	1	Two-sided Wilcoxon test	0.25	5
Smad6	0.00595978	-0.147484	0.659	0.742	1	Two-sided Wilcoxon test	0.25	5
Slc39a9	0.00600825	-0.0773221	0.232	0.318	1	Two-sided Wilcoxon test	0.25	5
Taf13	0.00601512	-0.0492166	0.33	0.43	1	Two-sided Wilcoxon test	0.25	5
Snx9	0.0060296	-0.122417	0.658	0.732	1	Two-sided Wilcoxon test	0.25	5
Fbxl15	0.00603351	-0.0188566	0.087	0.146	1	Two-sided Wilcoxon test	0.25	5
Heg1	0.00603933	-0.14643	0.704	0.798	1	Two-sided Wilcoxon test	0.25	5
Swi5	0.00606714	0.125085	0.848	0.815	1	Two-sided Wilcoxon test	0.25	5
Trim28	0.00608079	0.129655	0.788	0.742	1	Two-sided Wilcoxon test	0.25	5
Puf60	0.00608578	-0.13659	0.764	0.821	1	Two-sided Wilcoxon test	0.25	5
Kank3	0.00609782	-0.0571243	0.192	0.272	1	Two-sided Wilcoxon test	0.25	5
Slc44a1	0.00611251	-0.0747748	0.501	0.613	1	Two-sided Wilcoxon test	0.25	5
Cdk12	0.00612052	-0.159403	0.764	0.815	1	Two-sided Wilcoxon test	0.25	5
Clec2d	0.00612139	-0.0210947	0.033	0.073	1	Two-sided Wilcoxon test	0.25	5
Noc2l	0.00613844	0.11652	0.519	0.467	1	Two-sided Wilcoxon test	0.25	5
Tek	0.00614145	-0.125699	0.916	0.921	1	Two-sided Wilcoxon test	0.25	5
Slc25a4	0.00614717	-0.144878	0.9	0.921	1	Two-sided Wilcoxon test	0.25	5
Arrdc3	0.00615101	-0.168387	0.589	0.669	1	Two-sided Wilcoxon test	0.25	5
Bnip1	0.0061706	-0.0623179	0.22	0.311	1	Two-sided Wilcoxon test	0.25	5
St6galnac3	0.00617687	-0.262265	0.948	0.977	1	Two-sided Wilcoxon test	0.25	5
Mpst	0.0061863	-0.0609182	0.153	0.225	1	Two-sided Wilcoxon test	0.25	5
Dnaaf5	0.00620155	-0.0161349	0.112	0.179	1	Two-sided Wilcoxon test	0.25	5
Synrg	0.00620729	-0.109446	0.334	0.434	1	Two-sided Wilcoxon test	0.25	5
Entpd7	0.00622099	-0.111691	0.306	0.394	1	Two-sided Wilcoxon test	0.25	5
Letm2	0.00622319	-0.0733191	0.079	0.132	1	Two-sided Wilcoxon test	0.25	5
Fabp5	0.00624971	0.205204	0.949	0.894	1	Two-sided Wilcoxon test	0.25	5
Ets2	0.00625659	-0.153973	0.696	0.745	1	Two-sided Wilcoxon test	0.25	5
Mau2	0.00625734	-0.0683958	0.465	0.563	1	Two-sided Wilcoxon test	0.25	5
Pbrm1	0.00625748	0.142354	0.895	0.851	1	Two-sided Wilcoxon test	0.25	5
Pink1	0.00626461	-0.0242193	0.146	0.219	1	Two-sided Wilcoxon test	0.25	5
Mcu	0.00627448	-0.216816	0.625	0.682	1	Two-sided Wilcoxon test	0.25	5
Oat	0.00627777	0.125722	0.647	0.599	1	Two-sided Wilcoxon test	0.25	5
Prrx2	0.0062853	0.0653884	0.145	0.083	1	Two-sided Wilcoxon test	0.25	5
Adgrl1	0.00629117	-0.110178	0.332	0.427	1	Two-sided Wilcoxon test	0.25	5
Sash1	0.00634792	-0.163207	0.754	0.795	1	Two-sided Wilcoxon test	0.25	5
Jagn1	0.00634938	-0.0478614	0.411	0.53	1	Two-sided Wilcoxon test	0.25	5
Eif4g1	0.00635419	0.149394	0.87	0.844	1	Two-sided Wilcoxon test	0.25	5
Gm36445	0.0063706	-0.00141431	0.1	0.166	1	Two-sided Wilcoxon test	0.25	5
Rab34	0.00637181	-0.072012	0.257	0.348	1	Two-sided Wilcoxon test	0.25	5
Kif21a	0.00639803	-0.0422169	0.249	0.338	1	Two-sided Wilcoxon test	0.25	5
Lama4	0.00640407	-0.204345	0.782	0.831	1	Two-sided Wilcoxon test	0.25	5
Elk4	0.00641092	-0.168046	0.47	0.553	1	Two-sided Wilcoxon test	0.25	5
Taf8	0.00642599	-0.0869849	0.173	0.248	1	Two-sided Wilcoxon test	0.25	5
Scp2	0.00642727	-0.118406	0.7	0.695	1	Two-sided Wilcoxon test	0.25	5
Fam43a	0.00643533	-0.0909275	0.28	0.371	1	Two-sided Wilcoxon test	0.25	5
Ahsa1	0.00645845	-0.113009	0.586	0.656	1	Two-sided Wilcoxon test	0.25	5
Nfs1	0.00645878	-0.0465627	0.309	0.421	1	Two-sided Wilcoxon test	0.25	5
Pam16	0.00646086	0.159987	0.534	0.497	1	Two-sided Wilcoxon test	0.25	5
Gm17529	0.0064645	-0.0419633	0.087	0.142	1	Two-sided Wilcoxon test	0.25	5
Capn2	0.00648991	-0.101785	0.502	0.603	1	Two-sided Wilcoxon test	0.25	5
Zfpm2	0.00649363	-0.388926	0.881	0.93	1	Two-sided Wilcoxon test	0.25	5
Atp5o	0.00649528	0.121973	0.895	0.871	1	Two-sided Wilcoxon test	0.25	5
Slc39a7	0.00651756	-0.106909	0.513	0.589	1	Two-sided Wilcoxon test	0.25	5
Frg2f1	0.00653675	-0.0202043	0.039	0.079	1	Two-sided Wilcoxon test	0.25	5
Pnpt1	0.00653829	-0.135479	0.481	0.573	1	Two-sided Wilcoxon test	0.25	5
Bex2	0.00654033	0.179346	0.383	0.318	1	Two-sided Wilcoxon test	0.25	5
Coq8a	0.00655639	-0.029896	0.025	0.06	1	Two-sided Wilcoxon test	0.25	5
Gm13431	0.00656616	-0.0300943	0.067	0.119	1	Two-sided Wilcoxon test	0.25	5
Aldh3b1	0.00657439	-0.0257026	0.057	0.106	1	Two-sided Wilcoxon test	0.25	5
Samsn1	0.00658375	-0.11968	0.133	0.199	1	Two-sided Wilcoxon test	0.25	5
Sf3b5	0.00658868	0.115365	0.832	0.775	1	Two-sided Wilcoxon test	0.25	5
Nf1	0.00659663	-0.160851	0.897	0.924	1	Two-sided Wilcoxon test	0.25	5
Ccnc	0.00660281	-0.140301	0.409	0.507	1	Two-sided Wilcoxon test	0.25	5
Zfp444	0.00660357	-0.0473919	0.176	0.252	1	Two-sided Wilcoxon test	0.25	5
Ppp4c	0.00661547	-0.0939333	0.593	0.659	1	Two-sided Wilcoxon test	0.25	5
Osbpl8	0.00662544	-0.134462	0.646	0.745	1	Two-sided Wilcoxon test	0.25	5
Ccnt1	0.00662677	-0.130298	0.718	0.775	1	Two-sided Wilcoxon test	0.25	5
Plekhg1	0.00667707	-0.205376	0.708	0.758	1	Two-sided Wilcoxon test	0.25	5
Rbpms2	0.00669623	0.0588184	0.205	0.139	1	Two-sided Wilcoxon test	0.25	5
Gtf2h5	0.00669689	0.121799	0.814	0.781	1	Two-sided Wilcoxon test	0.25	5
Zfp68	0.00669762	-0.102637	0.427	0.543	1	Two-sided Wilcoxon test	0.25	5
A030001D20Rik	0.00672296	-0.0242466	0.055	0.103	1	Two-sided Wilcoxon test	0.25	5
Arfgap2	0.00672993	-0.0632141	0.387	0.49	1	Two-sided Wilcoxon test	0.25	5
Cd320	0.00673415	-0.0548026	0.245	0.344	1	Two-sided Wilcoxon test	0.25	5
Mettl25	0.00674498	-0.131696	0.393	0.49	1	Two-sided Wilcoxon test	0.25	5
Hist2h2bb	0.00675161	0.0662612	0.1	0.05	1	Two-sided Wilcoxon test	0.25	5
Trappc8	0.00677129	-0.110127	0.549	0.649	1	Two-sided Wilcoxon test	0.25	5
Pspc1	0.00678219	-0.2186	0.68	0.775	1	Two-sided Wilcoxon test	0.25	5
Arih1	0.00680617	-0.249358	0.939	0.937	1	Two-sided Wilcoxon test	0.25	5
Brcc3	0.00683146	-0.132648	0.487	0.576	1	Two-sided Wilcoxon test	0.25	5
Ftx	0.00683195	-0.109245	0.264	0.354	1	Two-sided Wilcoxon test	0.25	5
Plcd3	0.00683245	-0.050921	0.056	0.103	1	Two-sided Wilcoxon test	0.25	5
Arpc1b	0.00684384	-0.155174	0.724	0.755	1	Two-sided Wilcoxon test	0.25	5
Sumf2	0.00684472	-0.0749908	0.338	0.437	1	Two-sided Wilcoxon test	0.25	5
Sirt2	0.00684887	-0.065919	0.393	0.507	1	Two-sided Wilcoxon test	0.25	5
Layn	0.00684973	-0.0846397	0.246	0.334	1	Two-sided Wilcoxon test	0.25	5
Trip13	0.00685561	0.139442	0.382	0.308	1	Two-sided Wilcoxon test	0.25	5
Strn3	0.00685902	-0.167747	0.917	0.947	1	Two-sided Wilcoxon test	0.25	5
Cap1	0.00686205	-0.0947862	0.557	0.652	1	Two-sided Wilcoxon test	0.25	5
Far1os	0.0068786	-0.0897065	0.103	0.162	1	Two-sided Wilcoxon test	0.25	5
Tyms	0.00689664	0.17237	0.728	0.685	1	Two-sided Wilcoxon test	0.25	5
Ezh1	0.00691486	-0.0969664	0.246	0.334	1	Two-sided Wilcoxon test	0.25	5
Txn1	0.00692112	0.13906	0.891	0.851	1	Two-sided Wilcoxon test	0.25	5
Tmem243	0.00694974	-0.121624	0.322	0.424	1	Two-sided Wilcoxon test	0.25	5
Prr14l	0.00695456	-0.126686	0.627	0.722	1	Two-sided Wilcoxon test	0.25	5
Polr2l	0.00695829	0.056983	0.265	0.195	1	Two-sided Wilcoxon test	0.25	5
Ccnjl	0.00696264	-0.121691	0.607	0.669	1	Two-sided Wilcoxon test	0.25	5
Atp11b	0.00696613	-0.129452	0.652	0.738	1	Two-sided Wilcoxon test	0.25	5
Nav1	0.00698159	-0.121614	0.856	0.894	1	Two-sided Wilcoxon test	0.25	5
Dip2a	0.0069925	-0.0477667	0.37	0.497	1	Two-sided Wilcoxon test	0.25	5
Pfkfb2	0.00702928	-0.0330515	0.053	0.099	1	Two-sided Wilcoxon test	0.25	5
Gm48678	0.00703343	-0.183378	0.196	0.268	1	Two-sided Wilcoxon test	0.25	5
Ano4	0.00704722	0.0377648	0.13	0.07	1	Two-sided Wilcoxon test	0.25	5
Hsd3b7	0.00704943	-0.0371328	0.148	0.222	1	Two-sided Wilcoxon test	0.25	5
Snx13	0.00712319	-0.164926	0.471	0.543	1	Two-sided Wilcoxon test	0.25	5
Ireb2	0.00713185	-0.0990131	0.708	0.772	1	Two-sided Wilcoxon test	0.25	5
Fars2	0.00713518	-0.156394	0.72	0.798	1	Two-sided Wilcoxon test	0.25	5
Zmym6	0.00714163	-0.0632483	0.182	0.258	1	Two-sided Wilcoxon test	0.25	5
Ctnnb1	0.00714506	-0.154647	0.896	0.887	1	Two-sided Wilcoxon test	0.25	5
BC005624	0.00719376	-0.12222	0.417	0.51	1	Two-sided Wilcoxon test	0.25	5
Firre	0.00720774	-0.077649	0.278	0.358	1	Two-sided Wilcoxon test	0.25	5
Sccpdh	0.00723607	-0.0830702	0.205	0.291	1	Two-sided Wilcoxon test	0.25	5
Lrrtm3	0.0072543	-0.0362676	0.021	0.053	1	Two-sided Wilcoxon test	0.25	5
Sema3c	0.00726426	0.0717397	0.208	0.142	1	Two-sided Wilcoxon test	0.25	5
Akap8l	0.00729439	-0.0868248	0.372	0.474	1	Two-sided Wilcoxon test	0.25	5
Atp2c1	0.0073137	-0.133944	0.687	0.728	1	Two-sided Wilcoxon test	0.25	5
Gm9984	0.00731806	-0.068222	0.108	0.172	1	Two-sided Wilcoxon test	0.25	5
Ube2h	0.00736143	-0.163323	0.856	0.848	1	Two-sided Wilcoxon test	0.25	5
Pkp2	0.00736253	-0.0843446	0.242	0.334	1	Two-sided Wilcoxon test	0.25	5
Asxl1	0.00736844	-0.154459	0.782	0.834	1	Two-sided Wilcoxon test	0.25	5
Rnf181	0.00736941	-0.0655136	0.237	0.318	1	Two-sided Wilcoxon test	0.25	5
Plbd2	0.00738248	-0.0648336	0.237	0.328	1	Two-sided Wilcoxon test	0.25	5
Fryl	0.00738472	-0.148157	0.788	0.841	1	Two-sided Wilcoxon test	0.25	5
Washc3	0.00740758	-0.0545682	0.26	0.358	1	Two-sided Wilcoxon test	0.25	5
Wipf3	0.00741537	-0.138654	0.317	0.397	1	Two-sided Wilcoxon test	0.25	5
Tmem167b	0.00742652	-0.0834223	0.236	0.318	1	Two-sided Wilcoxon test	0.25	5
Cdc37	0.00747883	0.118674	0.834	0.788	1	Two-sided Wilcoxon test	0.25	5
Znrf1	0.00747991	-0.209581	0.744	0.821	1	Two-sided Wilcoxon test	0.25	5
4930512B01Rik	0.00750724	-0.126487	0.093	0.152	1	Two-sided Wilcoxon test	0.25	5
Zfp202	0.00751245	-0.0219279	0.068	0.119	1	Two-sided Wilcoxon test	0.25	5
Zfp687	0.0075159	-0.0801998	0.16	0.232	1	Two-sided Wilcoxon test	0.25	5
Zfr	0.00756543	-0.118318	0.81	0.868	1	Two-sided Wilcoxon test	0.25	5
Nox4	0.0075704	-0.157612	0.405	0.483	1	Two-sided Wilcoxon test	0.25	5
Ifnar2	0.00757266	-0.11312	0.605	0.679	1	Two-sided Wilcoxon test	0.25	5
Lrp6	0.00759851	-0.149339	0.684	0.781	1	Two-sided Wilcoxon test	0.25	5
Ift22	0.00760431	-0.050873	0.226	0.315	1	Two-sided Wilcoxon test	0.25	5
Ormdl3	0.00762665	-0.0952711	0.285	0.377	1	Two-sided Wilcoxon test	0.25	5
Trmt11	0.00763673	-0.0952756	0.325	0.427	1	Two-sided Wilcoxon test	0.25	5
Asb7	0.00764493	-0.0964709	0.28	0.364	1	Two-sided Wilcoxon test	0.25	5
Surf2	0.00765057	-0.0117037	0.184	0.265	1	Two-sided Wilcoxon test	0.25	5
Pnrc2	0.00765352	-0.0695603	0.441	0.54	1	Two-sided Wilcoxon test	0.25	5
Glrx3	0.00766481	-0.110985	0.827	0.834	1	Two-sided Wilcoxon test	0.25	5
Plcg2	0.00767981	-0.0280142	0.069	0.119	1	Two-sided Wilcoxon test	0.25	5
Trnau1ap	0.00775628	0.127508	0.514	0.454	1	Two-sided Wilcoxon test	0.25	5
Nudcd3	0.00777271	0.117522	0.651	0.613	1	Two-sided Wilcoxon test	0.25	5
Atp1a1	0.00778154	-0.193784	0.795	0.808	1	Two-sided Wilcoxon test	0.25	5
Dhrs7	0.00782461	-0.0289522	0.232	0.321	1	Two-sided Wilcoxon test	0.25	5
Atg7	0.00783432	-0.1481	0.28	0.361	1	Two-sided Wilcoxon test	0.25	5
Pbk	0.00785678	0.154196	0.322	0.255	1	Two-sided Wilcoxon test	0.25	5
Nudt16l1	0.00786675	0.096942	0.426	0.374	1	Two-sided Wilcoxon test	0.25	5
Maml3	0.00786685	-0.276069	0.839	0.881	1	Two-sided Wilcoxon test	0.25	5
Bmf	0.00789061	-0.0258486	0.083	0.139	1	Two-sided Wilcoxon test	0.25	5
Gm10135	0.00790607	-0.0329208	0.056	0.103	1	Two-sided Wilcoxon test	0.25	5
Znrd2	0.00791435	0.130681	0.537	0.487	1	Two-sided Wilcoxon test	0.25	5
Tmod3	0.00792197	-0.125162	0.802	0.818	1	Two-sided Wilcoxon test	0.25	5
Serf1	0.0079231	0.0990351	0.493	0.424	1	Two-sided Wilcoxon test	0.25	5
Ccdc22	0.00793999	-0.036099	0.156	0.228	1	Two-sided Wilcoxon test	0.25	5
Ddx50	0.00795349	-0.147802	0.816	0.841	1	Two-sided Wilcoxon test	0.25	5
2410004B18Rik	0.00795874	-0.0677919	0.314	0.417	1	Two-sided Wilcoxon test	0.25	5
Nr2f1	0.0079724	0.0968326	0.166	0.106	1	Two-sided Wilcoxon test	0.25	5
Rbm18	0.00799258	-0.0740062	0.43	0.54	1	Two-sided Wilcoxon test	0.25	5
Ncoa7	0.00803751	-0.130831	0.462	0.57	1	Two-sided Wilcoxon test	0.25	5
Tcp11l2	0.00805065	-0.0490482	0.079	0.132	1	Two-sided Wilcoxon test	0.25	5
Kansl2	0.00806629	-0.122675	0.469	0.573	1	Two-sided Wilcoxon test	0.25	5
Rnaseh2a	0.00810844	-0.0829249	0.306	0.404	1	Two-sided Wilcoxon test	0.25	5
Pigc	0.0081117	-0.016106	0.103	0.166	1	Two-sided Wilcoxon test	0.25	5
Gtf2h1	0.00811834	-0.0932738	0.61	0.702	1	Two-sided Wilcoxon test	0.25	5
Vamp2	0.00811975	-0.0558712	0.177	0.252	1	Two-sided Wilcoxon test	0.25	5
Ndufab1	0.00812067	0.128336	0.846	0.818	1	Two-sided Wilcoxon test	0.25	5
Errfi1	0.00813614	-0.11051	0.25	0.331	1	Two-sided Wilcoxon test	0.25	5
Mcm2	0.0081586	0.119141	0.601	0.546	1	Two-sided Wilcoxon test	0.25	5
Srpk2	0.00816289	-0.148272	0.692	0.762	1	Two-sided Wilcoxon test	0.25	5
Gcc2	0.00818531	-0.122993	0.76	0.838	1	Two-sided Wilcoxon test	0.25	5
Rfc4	0.00818791	0.159404	0.542	0.503	1	Two-sided Wilcoxon test	0.25	5
1810037I17Rik	0.00818963	0.127018	0.694	0.652	1	Two-sided Wilcoxon test	0.25	5
Pdrg1	0.00824716	-0.0802645	0.321	0.424	1	Two-sided Wilcoxon test	0.25	5
Ankrd10	0.00825408	-0.126767	0.558	0.662	1	Two-sided Wilcoxon test	0.25	5
Rsu1	0.00826162	-0.157797	0.69	0.735	1	Two-sided Wilcoxon test	0.25	5
Phykpl	0.00827709	-0.133054	0.362	0.47	1	Two-sided Wilcoxon test	0.25	5
Phc2	0.00830453	-0.114358	0.652	0.758	1	Two-sided Wilcoxon test	0.25	5
Kmt2c	0.00830614	-0.179966	0.852	0.874	1	Two-sided Wilcoxon test	0.25	5
Dnajc8	0.00831373	0.135729	0.794	0.778	1	Two-sided Wilcoxon test	0.25	5
Usp35	0.00833663	-0.0464804	0.04	0.079	1	Two-sided Wilcoxon test	0.25	5
Gm13684	0.00838732	-0.0948213	0.105	0.166	1	Two-sided Wilcoxon test	0.25	5
Phf5a	0.00842068	0.139717	0.818	0.788	1	Two-sided Wilcoxon test	0.25	5
Sfrp2	0.00842536	0.0473413	0.068	0.026	1	Two-sided Wilcoxon test	0.25	5
Exoc3l	0.00842632	-0.0663022	0.246	0.328	1	Two-sided Wilcoxon test	0.25	5
Epha3	0.0084264	0.117775	0.105	0.053	1	Two-sided Wilcoxon test	0.25	5
Mrpl28	0.00849305	0.0760426	0.609	0.55	1	Two-sided Wilcoxon test	0.25	5
8030453O22Rik	0.00849695	-0.0310572	0.031	0.066	1	Two-sided Wilcoxon test	0.25	5
Retreg2	0.00850437	-0.0486649	0.288	0.381	1	Two-sided Wilcoxon test	0.25	5
Plxdc2	0.00850968	0.0977597	0.226	0.152	1	Two-sided Wilcoxon test	0.25	5
Zfp386	0.00852987	-0.0959175	0.314	0.404	1	Two-sided Wilcoxon test	0.25	5
Ptch2	0.00853175	-0.0520557	0.142	0.212	1	Two-sided Wilcoxon test	0.25	5
Pon3	0.0085449	-0.0719096	0.333	0.427	1	Two-sided Wilcoxon test	0.25	5
Tbx5	0.00856555	0.0345706	0.184	0.116	1	Two-sided Wilcoxon test	0.25	5
Ormdl1	0.00858129	-0.0711183	0.278	0.371	1	Two-sided Wilcoxon test	0.25	5
Nono	0.00859885	0.112744	0.876	0.851	1	Two-sided Wilcoxon test	0.25	5
Gm45902	0.00866239	-0.0924869	0.132	0.199	1	Two-sided Wilcoxon test	0.25	5
Mettl23	0.00866408	-0.0484678	0.344	0.447	1	Two-sided Wilcoxon test	0.25	5
Tspan11	0.00867404	-0.0293478	0.04	0.079	1	Two-sided Wilcoxon test	0.25	5
H2-Ke6	0.00869537	-0.0384816	0.149	0.219	1	Two-sided Wilcoxon test	0.25	5
Terf1	0.00872412	-0.143323	0.547	0.606	1	Two-sided Wilcoxon test	0.25	5
Azi2	0.00873004	-0.0994713	0.558	0.632	1	Two-sided Wilcoxon test	0.25	5
Tmem170b	0.00873401	-0.112201	0.24	0.318	1	Two-sided Wilcoxon test	0.25	5
Wdr55	0.00873718	-0.0276378	0.101	0.162	1	Two-sided Wilcoxon test	0.25	5
Rsl1	0.00874005	-0.017065	0.035	0.073	1	Two-sided Wilcoxon test	0.25	5
Nipsnap1	0.0087494	-0.0496218	0.312	0.414	1	Two-sided Wilcoxon test	0.25	5
Cfap36	0.00875395	-0.113647	0.486	0.583	1	Two-sided Wilcoxon test	0.25	5
Nfya	0.00876789	-0.155573	0.406	0.474	1	Two-sided Wilcoxon test	0.25	5
Ambra1	0.00882174	-0.187076	0.743	0.795	1	Two-sided Wilcoxon test	0.25	5
Bag3	0.00882868	-0.0961805	0.37	0.47	1	Two-sided Wilcoxon test	0.25	5
Vps41	0.00887462	-0.10995	0.581	0.659	1	Two-sided Wilcoxon test	0.25	5
Xylb	0.00888608	-0.0143677	0.02	0.05	1	Two-sided Wilcoxon test	0.25	5
Sfmbt2	0.00889818	-0.0324841	0.125	0.189	1	Two-sided Wilcoxon test	0.25	5
Sipa1l3	0.00890231	-0.124705	0.373	0.46	1	Two-sided Wilcoxon test	0.25	5
Psmb2	0.0089123	0.127823	0.887	0.854	1	Two-sided Wilcoxon test	0.25	5
Pum1	0.00895786	-0.149402	0.912	0.94	1	Two-sided Wilcoxon test	0.25	5
Rc3h2	0.00895902	-0.185459	0.594	0.709	1	Two-sided Wilcoxon test	0.25	5
Triobp	0.00897572	-0.084324	0.453	0.553	1	Two-sided Wilcoxon test	0.25	5
Pde8a	0.00898046	-0.234433	0.447	0.51	1	Two-sided Wilcoxon test	0.25	5
Mtr	0.00898586	-0.0499156	0.341	0.44	1	Two-sided Wilcoxon test	0.25	5
Pcolce	0.00901806	0.0686018	0.161	0.103	1	Two-sided Wilcoxon test	0.25	5
Nr1h2	0.00904864	-0.0792084	0.216	0.295	1	Two-sided Wilcoxon test	0.25	5
Sdhd	0.00907209	-0.0944582	0.506	0.603	1	Two-sided Wilcoxon test	0.25	5
Gm38604	0.00909849	-0.103874	0.079	0.129	1	Two-sided Wilcoxon test	0.25	5
Bcat2	0.00910363	-0.090527	0.342	0.43	1	Two-sided Wilcoxon test	0.25	5
Wdr91	0.00915661	-0.0426037	0.141	0.209	1	Two-sided Wilcoxon test	0.25	5
Pros1	0.00919878	-0.0614647	0.426	0.523	1	Two-sided Wilcoxon test	0.25	5
Brf1	0.00919896	-0.0631394	0.383	0.49	1	Two-sided Wilcoxon test	0.25	5
Ano8	0.00922332	-0.0456122	0.087	0.142	1	Two-sided Wilcoxon test	0.25	5
Tecpr2	0.00922888	0.0783953	0.277	0.212	1	Two-sided Wilcoxon test	0.25	5
Pcbp1	0.00923063	0.124143	0.87	0.834	1	Two-sided Wilcoxon test	0.25	5
AW551984	0.00928062	0.0258778	0.052	0.017	1	Two-sided Wilcoxon test	0.25	5
Pex5	0.00929497	-0.0485853	0.245	0.334	1	Two-sided Wilcoxon test	0.25	5
Fbrs	0.00933728	-0.0404557	0.261	0.358	1	Two-sided Wilcoxon test	0.25	5
Foxo1	0.00934801	-0.211609	0.778	0.828	1	Two-sided Wilcoxon test	0.25	5
Malt1	0.00935393	-0.104344	0.297	0.377	1	Two-sided Wilcoxon test	0.25	5
8030456M14Rik	0.00938373	-0.0291146	0.02	0.05	1	Two-sided Wilcoxon test	0.25	5
Gm26542	0.00941608	-0.0367262	0.22	0.305	1	Two-sided Wilcoxon test	0.25	5
Polr3h	0.00943818	-0.0578539	0.324	0.417	1	Two-sided Wilcoxon test	0.25	5
Mtm1	0.00945351	-0.0680375	0.182	0.258	1	Two-sided Wilcoxon test	0.25	5
Dnajc27	0.00953039	-0.048697	0.126	0.192	1	Two-sided Wilcoxon test	0.25	5
Hist1h2ap	0.00954044	0.16985	0.672	0.626	1	Two-sided Wilcoxon test	0.25	5
Snx1	0.00954747	-0.064013	0.361	0.457	1	Two-sided Wilcoxon test	0.25	5
Rmnd1	0.00955224	-0.0368811	0.304	0.397	1	Two-sided Wilcoxon test	0.25	5
Cherp	0.00955348	-0.0632946	0.329	0.427	1	Two-sided Wilcoxon test	0.25	5
Plekhm3	0.00958826	-0.0699614	0.296	0.391	1	Two-sided Wilcoxon test	0.25	5
Rab3gap2	0.00959765	-0.0924029	0.293	0.391	1	Two-sided Wilcoxon test	0.25	5
Cpox	0.00960234	-0.0243684	0.379	0.493	1	Two-sided Wilcoxon test	0.25	5
Ube2g1	0.00960367	-0.154826	0.807	0.864	1	Two-sided Wilcoxon test	0.25	5
Snrnp48	0.00962791	-0.10134	0.567	0.656	1	Two-sided Wilcoxon test	0.25	5
Strbp	0.00963194	-0.219442	0.86	0.881	1	Two-sided Wilcoxon test	0.25	5
Gm16853	0.00965541	-0.0583416	0.033	0.07	1	Two-sided Wilcoxon test	0.25	5
Por	0.00970378	0.08959	0.378	0.325	1	Two-sided Wilcoxon test	0.25	5
Swap70	0.00970727	-0.0900466	0.617	0.689	1	Two-sided Wilcoxon test	0.25	5
Srp14	0.00970776	0.130567	0.811	0.748	1	Two-sided Wilcoxon test	0.25	5
Esam	0.00970851	-0.152231	0.746	0.772	1	Two-sided Wilcoxon test	0.25	5
Dynll2	0.00972855	0.143949	0.679	0.652	1	Two-sided Wilcoxon test	0.25	5
Ccdc137	0.00973641	-0.0101625	0.134	0.205	1	Two-sided Wilcoxon test	0.25	5
1110032F04Rik	0.00979793	-0.0535361	0.152	0.222	1	Two-sided Wilcoxon test	0.25	5
Ccdc84	0.00980696	-0.0191057	0.105	0.166	1	Two-sided Wilcoxon test	0.25	5
Ankzf1	0.00980729	-0.0579224	0.111	0.172	1	Two-sided Wilcoxon test	0.25	5
Plce1	0.00983185	0.201474	0.273	0.202	1	Two-sided Wilcoxon test	0.25	5
Hsp90aa1	0.00983304	0.125563	0.928	0.93	1	Two-sided Wilcoxon test	0.25	5
Zswim5	0.00990428	-0.0429563	0.081	0.136	1	Two-sided Wilcoxon test	0.25	5
Tex2	0.0099162	-0.0918536	0.387	0.487	1	Two-sided Wilcoxon test	0.25	5
Acad10	0.00992384	-0.00289725	0.037	0.076	1	Two-sided Wilcoxon test	0.25	5
Kctd18	0.00992843	-0.120926	0.23	0.308	1	Two-sided Wilcoxon test	0.25	5
Vps37a	0.00993757	-0.0808464	0.434	0.53	1	Two-sided Wilcoxon test	0.25	5
Clcn3	0.00996383	-0.121641	0.587	0.666	1	Two-sided Wilcoxon test	0.25	5
Ddx24	0.00998777	0.146628	0.675	0.666	1	Two-sided Wilcoxon test	0.25	5
Maged1	0.0100401	0.130644	0.854	0.828	1	Two-sided Wilcoxon test	0.25	5
Eif4a1	0.0100471	0.126134	0.947	0.947	1	Two-sided Wilcoxon test	0.25	5
Paip1	0.0100491	-0.127077	0.716	0.768	1	Two-sided Wilcoxon test	0.25	5
Slc20a2	0.010074	-0.153681	0.454	0.536	1	Two-sided Wilcoxon test	0.25	5
Gm16740	0.01009	-0.0331505	0.091	0.149	1	Two-sided Wilcoxon test	0.25	5
Pop1	0.0101099	-0.12882	0.332	0.427	1	Two-sided Wilcoxon test	0.25	5
Ikzf5	0.0101153	-0.0463204	0.289	0.384	1	Two-sided Wilcoxon test	0.25	5
Slc9a8	0.0101213	-0.132401	0.26	0.341	1	Two-sided Wilcoxon test	0.25	5
Trub2	0.0101741	-0.0498278	0.252	0.348	1	Two-sided Wilcoxon test	0.25	5
Birc3	0.0102185	-0.0825078	0.095	0.149	1	Two-sided Wilcoxon test	0.25	5
Rab22a	0.0102215	-0.15778	0.582	0.669	1	Two-sided Wilcoxon test	0.25	5
Ppp1r14c	0.0102241	-0.206768	0.258	0.331	1	Two-sided Wilcoxon test	0.25	5
Socs4	0.0102325	-0.08833	0.39	0.487	1	Two-sided Wilcoxon test	0.25	5
Slc25a11	0.0102495	-0.134667	0.526	0.603	1	Two-sided Wilcoxon test	0.25	5
Pts	0.010286	-0.0651518	0.281	0.374	1	Two-sided Wilcoxon test	0.25	5
Kif3b	0.010288	-0.0596249	0.233	0.325	1	Two-sided Wilcoxon test	0.25	5
Gm4258	0.0102933	-0.153956	0.574	0.689	1	Two-sided Wilcoxon test	0.25	5
Naa35	0.0103565	0.109097	0.666	0.606	1	Two-sided Wilcoxon test	0.25	5
Metap2	0.0103624	0.13399	0.822	0.828	1	Two-sided Wilcoxon test	0.25	5
4833420G17Rik	0.0103625	-0.125078	0.505	0.583	1	Two-sided Wilcoxon test	0.25	5
Znhit1	0.0103672	0.119234	0.518	0.447	1	Two-sided Wilcoxon test	0.25	5
Gm10353	0.0103818	-0.0530921	0.039	0.076	1	Two-sided Wilcoxon test	0.25	5
Gm6225	0.0103828	-0.0690104	0.087	0.139	1	Two-sided Wilcoxon test	0.25	5
Os9	0.0104189	-0.0671882	0.422	0.523	1	Two-sided Wilcoxon test	0.25	5
Etfrf1	0.010438	-0.0412199	0.088	0.142	1	Two-sided Wilcoxon test	0.25	5
Elac1	0.0104512	-0.0295177	0.072	0.119	1	Two-sided Wilcoxon test	0.25	5
Tmpo	0.0104539	0.152835	0.848	0.844	1	Two-sided Wilcoxon test	0.25	5
Tk2	0.0104587	-0.0241638	0.067	0.116	1	Two-sided Wilcoxon test	0.25	5
Spred1	0.0104791	-0.125441	0.655	0.735	1	Two-sided Wilcoxon test	0.25	5
Sqstm1	0.0104819	-0.166395	0.659	0.732	1	Two-sided Wilcoxon test	0.25	5
1600010M07Rik	0.0105296	-0.170025	0.322	0.404	1	Two-sided Wilcoxon test	0.25	5
Ptpn4	0.0105735	-0.179677	0.639	0.735	1	Two-sided Wilcoxon test	0.25	5
Zmat1	0.0106024	-0.032826	0.138	0.205	1	Two-sided Wilcoxon test	0.25	5
Rnf139	0.0106048	-0.087144	0.31	0.394	1	Two-sided Wilcoxon test	0.25	5
Pim3	0.0106102	-0.103621	0.318	0.407	1	Two-sided Wilcoxon test	0.25	5
Atp6v1h	0.0106407	-0.152445	0.628	0.705	1	Two-sided Wilcoxon test	0.25	5
Zmym5	0.0106681	-0.0746762	0.499	0.593	1	Two-sided Wilcoxon test	0.25	5
Fubp3	0.01069	-0.10078	0.489	0.603	1	Two-sided Wilcoxon test	0.25	5
Ddi2	0.010697	-0.114089	0.534	0.623	1	Two-sided Wilcoxon test	0.25	5
Tcp1	0.0107468	0.132326	0.858	0.811	1	Two-sided Wilcoxon test	0.25	5
Gns	0.0107585	-0.0974837	0.365	0.457	1	Two-sided Wilcoxon test	0.25	5
Chn2	0.0107713	-0.240484	0.547	0.646	1	Two-sided Wilcoxon test	0.25	5
Kbtbd2	0.0107757	-0.0954965	0.578	0.662	1	Two-sided Wilcoxon test	0.25	5
Trp53i13	0.0107779	-0.069697	0.162	0.232	1	Two-sided Wilcoxon test	0.25	5
Zfhx4	0.0107867	0.0963023	0.225	0.156	1	Two-sided Wilcoxon test	0.25	5
Tmf1	0.01079	-0.103992	0.603	0.702	1	Two-sided Wilcoxon test	0.25	5
Cd37	0.0108005	-0.0267731	0.029	0.063	1	Two-sided Wilcoxon test	0.25	5
Riok1	0.0108024	-0.147237	0.518	0.596	1	Two-sided Wilcoxon test	0.25	5
Btbd1	0.0108137	-0.12706	0.73	0.775	1	Two-sided Wilcoxon test	0.25	5
Psma7	0.010846	0.137008	0.899	0.828	1	Two-sided Wilcoxon test	0.25	5
Apobec3	0.0108608	-0.0333932	0.189	0.258	1	Two-sided Wilcoxon test	0.25	5
Rims2	0.0108836	-0.158879	0.1	0.152	1	Two-sided Wilcoxon test	0.25	5
Sox5	0.0108908	-0.183715	0.565	0.619	1	Two-sided Wilcoxon test	0.25	5
Sigmar1	0.0108933	-0.0632025	0.254	0.338	1	Two-sided Wilcoxon test	0.25	5
Zfp655	0.0109291	-0.108902	0.399	0.493	1	Two-sided Wilcoxon test	0.25	5
Tmlhe	0.0109367	-0.14566	0.389	0.474	1	Two-sided Wilcoxon test	0.25	5
Kcne3	0.0109854	-0.0761484	0.063	0.109	1	Two-sided Wilcoxon test	0.25	5
Rnf13	0.0109971	-0.126599	0.304	0.387	1	Two-sided Wilcoxon test	0.25	5
Zfp963	0.0110329	-0.0590088	0.048	0.089	1	Two-sided Wilcoxon test	0.25	5
Prim2	0.0110344	0.153224	0.569	0.523	1	Two-sided Wilcoxon test	0.25	5
Cks1b	0.011047	0.163181	0.784	0.765	1	Two-sided Wilcoxon test	0.25	5
Chmp1b	0.0110609	-0.0925292	0.32	0.411	1	Two-sided Wilcoxon test	0.25	5
Spata6	0.011079	-0.12663	0.722	0.765	1	Two-sided Wilcoxon test	0.25	5
Atp9b	0.0111033	-0.0911636	0.731	0.815	1	Two-sided Wilcoxon test	0.25	5
Sumo3	0.0111244	0.129577	0.755	0.728	1	Two-sided Wilcoxon test	0.25	5
Gpr21	0.0111363	-0.0409122	0.029	0.063	1	Two-sided Wilcoxon test	0.25	5
Aff3	0.0111556	0.313528	0.222	0.162	1	Two-sided Wilcoxon test	0.25	5
Capn7	0.0111787	-0.153997	0.383	0.48	1	Two-sided Wilcoxon test	0.25	5
Dnajc12	0.0111887	-0.0279348	0.048	0.089	1	Two-sided Wilcoxon test	0.25	5
Ube2e3	0.0111915	-0.127739	0.843	0.844	1	Two-sided Wilcoxon test	0.25	5
Nrip1	0.0111997	0.166532	0.75	0.738	1	Two-sided Wilcoxon test	0.25	5
Amigo2	0.0112168	-0.04122	0.079	0.129	1	Two-sided Wilcoxon test	0.25	5
Sod1	0.0112737	0.107551	0.73	0.675	1	Two-sided Wilcoxon test	0.25	5
Jmjd1c	0.0112991	-0.225224	0.944	0.954	1	Two-sided Wilcoxon test	0.25	5
Atad2b	0.0113214	-0.127949	0.819	0.854	1	Two-sided Wilcoxon test	0.25	5
Rab3d	0.0113366	-0.00728984	0.092	0.149	1	Two-sided Wilcoxon test	0.25	5
Pomp	0.011372	0.1283	0.87	0.861	1	Two-sided Wilcoxon test	0.25	5
Npl	0.0113823	-0.0340273	0.156	0.228	1	Two-sided Wilcoxon test	0.25	5
Rbm8a	0.0113942	0.144354	0.824	0.808	1	Two-sided Wilcoxon test	0.25	5
4930455C13Rik	0.0114033	-0.0693914	0.079	0.129	1	Two-sided Wilcoxon test	0.25	5
Pdlim5	0.0114268	-0.159439	0.546	0.599	1	Two-sided Wilcoxon test	0.25	5
Gm45871	0.011432	-0.0236416	0.053	0.096	1	Two-sided Wilcoxon test	0.25	5
Ssr4	0.0114453	0.160189	0.819	0.772	1	Two-sided Wilcoxon test	0.25	5
Sparc	0.0114715	-0.155978	0.901	0.93	1	Two-sided Wilcoxon test	0.25	5
Cd99l2	0.0114813	-0.0478233	0.274	0.364	1	Two-sided Wilcoxon test	0.25	5
Ctsc	0.0115311	-0.0620141	0.154	0.222	1	Two-sided Wilcoxon test	0.25	5
Scamp2	0.0115314	-0.0971558	0.443	0.53	1	Two-sided Wilcoxon test	0.25	5
Zdhhc1	0.0115416	-0.0466741	0.141	0.209	1	Two-sided Wilcoxon test	0.25	5
Bik	0.0115511	-0.058	0.306	0.401	1	Two-sided Wilcoxon test	0.25	5
Gm44649	0.0115886	-0.0481997	0.051	0.093	1	Two-sided Wilcoxon test	0.25	5
Zfp105	0.011593	-0.0277523	0.197	0.278	1	Two-sided Wilcoxon test	0.25	5
Rp9	0.0116009	0.145046	0.651	0.606	1	Two-sided Wilcoxon test	0.25	5
Rbl2	0.0116041	-0.108169	0.237	0.311	1	Two-sided Wilcoxon test	0.25	5
Tgfbrap1	0.0116187	-0.0544817	0.177	0.252	1	Two-sided Wilcoxon test	0.25	5
Ftl1-ps1	0.0116398	0.0749794	0.165	0.109	1	Two-sided Wilcoxon test	0.25	5
A730081D07Rik	0.0117091	-0.0149907	0.156	0.228	1	Two-sided Wilcoxon test	0.25	5
Gm49708	0.0117395	-0.0769523	0.324	0.414	1	Two-sided Wilcoxon test	0.25	5
Arf5	0.0117407	-0.112459	0.839	0.871	1	Two-sided Wilcoxon test	0.25	5
Ap4e1	0.0117632	-0.09104	0.266	0.351	1	Two-sided Wilcoxon test	0.25	5
Trip11	0.0117754	-0.146783	0.684	0.748	1	Two-sided Wilcoxon test	0.25	5
Ubc	0.0117824	-0.123617	0.912	0.891	1	Two-sided Wilcoxon test	0.25	5
Ppil2	0.0117983	-0.0635558	0.537	0.616	1	Two-sided Wilcoxon test	0.25	5
Uck1	0.0118092	-0.0275948	0.141	0.209	1	Two-sided Wilcoxon test	0.25	5
Cep83os	0.0118172	-0.060193	0.085	0.136	1	Two-sided Wilcoxon test	0.25	5
Rpa1	0.0118244	0.123627	0.505	0.454	1	Two-sided Wilcoxon test	0.25	5
Pafah1b1	0.0118607	-0.0983817	0.887	0.911	1	Two-sided Wilcoxon test	0.25	5
Adgra3	0.0118635	-0.0875949	0.401	0.503	1	Two-sided Wilcoxon test	0.25	5
4930522L14Rik	0.0118708	-0.032267	0.113	0.172	1	Two-sided Wilcoxon test	0.25	5
Cntln	0.0118717	-0.120709	0.639	0.685	1	Two-sided Wilcoxon test	0.25	5
Pgd	0.0118879	0.126317	0.539	0.483	1	Two-sided Wilcoxon test	0.25	5
Rbm4b	0.0118966	-0.175939	0.487	0.573	1	Two-sided Wilcoxon test	0.25	5
Trp53inp2	0.0119514	-0.032048	0.173	0.242	1	Two-sided Wilcoxon test	0.25	5
Pex10	0.011971	-0.0715647	0.092	0.142	1	Two-sided Wilcoxon test	0.25	5
Sec63	0.0119791	-0.143923	0.815	0.871	1	Two-sided Wilcoxon test	0.25	5
Tsc22d1	0.0119849	-0.153908	0.775	0.838	1	Two-sided Wilcoxon test	0.25	5
Nudt14	0.0120093	-0.0585171	0.298	0.394	1	Two-sided Wilcoxon test	0.25	5
Csnk1g3	0.012024	-0.0789283	0.759	0.808	1	Two-sided Wilcoxon test	0.25	5
Bola3	0.0120701	0.0793101	0.566	0.523	1	Two-sided Wilcoxon test	0.25	5
App	0.0120907	-0.121072	0.932	0.944	1	Two-sided Wilcoxon test	0.25	5
Rnf41	0.0121324	-0.0530391	0.248	0.331	1	Two-sided Wilcoxon test	0.25	5
Pnpla8	0.0121412	-0.0709383	0.606	0.672	1	Two-sided Wilcoxon test	0.25	5
Ddit4l	0.0121492	-0.035079	0.025	0.056	1	Two-sided Wilcoxon test	0.25	5
Taok2	0.0121553	-0.0788286	0.553	0.636	1	Two-sided Wilcoxon test	0.25	5
Cacna1e	0.0121651	-0.117126	0.141	0.205	1	Two-sided Wilcoxon test	0.25	5
Zfp971	0.0121897	-0.0532009	0.099	0.152	1	Two-sided Wilcoxon test	0.25	5
Map4k4	0.012208	-0.141522	0.925	0.947	1	Two-sided Wilcoxon test	0.25	5
Arnt	0.0122089	-0.114711	0.714	0.748	1	Two-sided Wilcoxon test	0.25	5
Snhg8	0.0122125	0.127537	0.485	0.444	1	Two-sided Wilcoxon test	0.25	5
Vta1	0.0122144	-0.132803	0.686	0.765	1	Two-sided Wilcoxon test	0.25	5
Hbs1l	0.0122153	-0.138153	0.634	0.699	1	Two-sided Wilcoxon test	0.25	5
Kctd4	0.0122453	-0.0925042	0.069	0.116	1	Two-sided Wilcoxon test	0.25	5
Bckdha	0.0122909	-0.0522143	0.29	0.381	1	Two-sided Wilcoxon test	0.25	5
Dnah2os	0.0123086	-0.0180768	0.039	0.076	1	Two-sided Wilcoxon test	0.25	5
Zbtb41	0.0123128	-0.137457	0.298	0.384	1	Two-sided Wilcoxon test	0.25	5
St6gal1	0.0124093	-0.0676926	0.506	0.599	1	Two-sided Wilcoxon test	0.25	5
Fxyd6	0.0124348	0.119839	0.425	0.361	1	Two-sided Wilcoxon test	0.25	5
Hnrnpd	0.0124386	0.117662	0.908	0.887	1	Two-sided Wilcoxon test	0.25	5
Rlim	0.012485	-0.139248	0.877	0.891	1	Two-sided Wilcoxon test	0.25	5
Gm10762	0.0124951	-0.0388252	0.206	0.285	1	Two-sided Wilcoxon test	0.25	5
Eps15l1	0.0125039	-0.118123	0.686	0.748	1	Two-sided Wilcoxon test	0.25	5
Lrch2	0.0125136	0.090719	0.305	0.238	1	Two-sided Wilcoxon test	0.25	5
Ube2i	0.0125218	-0.084808	0.88	0.894	1	Two-sided Wilcoxon test	0.25	5
Rabif	0.0125332	-0.105057	0.305	0.381	1	Two-sided Wilcoxon test	0.25	5
Sirt6	0.0125577	-0.0201784	0.104	0.162	1	Two-sided Wilcoxon test	0.25	5
Fyco1	0.0125892	-0.0883975	0.348	0.44	1	Two-sided Wilcoxon test	0.25	5
Ppp3cb	0.0125935	-0.104829	0.658	0.715	1	Two-sided Wilcoxon test	0.25	5
Kmt2d	0.012605	-0.070259	0.365	0.464	1	Two-sided Wilcoxon test	0.25	5
Fuca2	0.0126062	-0.0438223	0.13	0.192	1	Two-sided Wilcoxon test	0.25	5
Fgfbp3	0.0126618	-0.0337851	0.06	0.106	1	Two-sided Wilcoxon test	0.25	5
Nsmaf	0.0126633	-0.127609	0.486	0.599	1	Two-sided Wilcoxon test	0.25	5
Fh1	0.0126714	-0.0737621	0.418	0.513	1	Two-sided Wilcoxon test	0.25	5
Lars2	0.0126894	-0.213783	0.764	0.825	1	Two-sided Wilcoxon test	0.25	5
Echdc3	0.0126916	-0.0348218	0.028	0.06	1	Two-sided Wilcoxon test	0.25	5
Dap	0.0126948	-0.11253	0.517	0.593	1	Two-sided Wilcoxon test	0.25	5
Cmbl	0.0127077	-0.028446	0.128	0.195	1	Two-sided Wilcoxon test	0.25	5
Tinagl1	0.0127114	-0.0693508	0.192	0.272	1	Two-sided Wilcoxon test	0.25	5
Vps50	0.0127458	-0.107583	0.453	0.55	1	Two-sided Wilcoxon test	0.25	5
Gm14798	0.0127525	-0.0968529	0.093	0.146	1	Two-sided Wilcoxon test	0.25	5
Ppp3cc	0.0127664	-0.047452	0.076	0.126	1	Two-sided Wilcoxon test	0.25	5
Calcoco1	0.0128307	-0.039006	0.157	0.225	1	Two-sided Wilcoxon test	0.25	5
Lgals1	0.0128531	0.189852	0.788	0.738	1	Two-sided Wilcoxon test	0.25	5
Prrx1	0.0128633	0.0474896	0.084	0.04	1	Two-sided Wilcoxon test	0.25	5
Tmem167	0.0128897	0.11375	0.852	0.818	1	Two-sided Wilcoxon test	0.25	5
Zfp462	0.0129055	-0.167125	0.794	0.841	1	Two-sided Wilcoxon test	0.25	5
Tet2	0.0129083	-0.146864	0.551	0.642	1	Two-sided Wilcoxon test	0.25	5
Fbxl20	0.0129102	-0.120408	0.354	0.43	1	Two-sided Wilcoxon test	0.25	5
Inka1	0.0129117	-0.0681782	0.474	0.566	1	Two-sided Wilcoxon test	0.25	5
Arrb1	0.0129145	-0.069726	0.26	0.348	1	Two-sided Wilcoxon test	0.25	5
Elp3	0.0129403	-0.0942178	0.481	0.586	1	Two-sided Wilcoxon test	0.25	5
Hsdl1	0.0129568	-0.0431564	0.217	0.305	1	Two-sided Wilcoxon test	0.25	5
Kif1b	0.012998	-0.135433	0.852	0.887	1	Two-sided Wilcoxon test	0.25	5
Nox1	0.0130192	-0.0251942	0.053	0.096	1	Two-sided Wilcoxon test	0.25	5
Cst3	0.0130425	-0.104155	0.775	0.778	1	Two-sided Wilcoxon test	0.25	5
Mcfd2	0.0130504	-0.0940883	0.381	0.48	1	Two-sided Wilcoxon test	0.25	5
Gm42047	0.0130642	-0.179297	0.253	0.315	1	Two-sided Wilcoxon test	0.25	5
Chsy3	0.0130691	0.109132	0.144	0.089	1	Two-sided Wilcoxon test	0.25	5
Rab11b	0.0130776	0.135658	0.774	0.758	1	Two-sided Wilcoxon test	0.25	5
Gm11250	0.0131007	-0.075625	0.035	0.07	1	Two-sided Wilcoxon test	0.25	5
Skap2	0.0131027	-0.11426	0.461	0.553	1	Two-sided Wilcoxon test	0.25	5
Wsb2	0.0131186	-0.0914004	0.325	0.411	1	Two-sided Wilcoxon test	0.25	5
Ntmt1	0.0131447	-0.11613	0.438	0.54	1	Two-sided Wilcoxon test	0.25	5
Dph7	0.0131677	-0.0315613	0.14	0.209	1	Two-sided Wilcoxon test	0.25	5
Gtf2h3	0.013194	-0.0333069	0.205	0.278	1	Two-sided Wilcoxon test	0.25	5
Esyt2	0.013197	-0.129505	0.678	0.732	1	Two-sided Wilcoxon test	0.25	5
Hapln3	0.0132395	-0.0148192	0.035	0.07	1	Two-sided Wilcoxon test	0.25	5
Ccbe1	0.0132511	0.0509673	0.055	0.02	1	Two-sided Wilcoxon test	0.25	5
Rufy1	0.0132582	-0.0979034	0.334	0.424	1	Two-sided Wilcoxon test	0.25	5
Gm12592	0.0132845	-0.0626779	0.156	0.222	1	Two-sided Wilcoxon test	0.25	5
Gpr137b	0.0133279	-0.0624551	0.217	0.288	1	Two-sided Wilcoxon test	0.25	5
Slc38a10	0.0133389	-0.0625413	0.57	0.652	1	Two-sided Wilcoxon test	0.25	5
Pard3b	0.0133883	-0.266328	0.788	0.831	1	Two-sided Wilcoxon test	0.25	5
Xlr3b	0.0134004	-0.0458384	0.021	0.05	1	Two-sided Wilcoxon test	0.25	5
Eif4ebp2	0.0134159	-0.109249	0.566	0.652	1	Two-sided Wilcoxon test	0.25	5
Midn	0.0134294	0.134634	0.688	0.646	1	Two-sided Wilcoxon test	0.25	5
Nr2f6	0.0134422	-0.105303	0.487	0.579	1	Two-sided Wilcoxon test	0.25	5
Rnpc3	0.0134697	-0.118715	0.518	0.589	1	Two-sided Wilcoxon test	0.25	5
Fscn1	0.0134813	0.130641	0.822	0.748	1	Two-sided Wilcoxon test	0.25	5
Phrf1	0.013507	-0.09972	0.559	0.639	1	Two-sided Wilcoxon test	0.25	5
Dalrd3	0.0135108	-0.0496568	0.142	0.209	1	Two-sided Wilcoxon test	0.25	5
Commd2	0.0135553	0.107569	0.618	0.579	1	Two-sided Wilcoxon test	0.25	5
Cenpi	0.0135807	0.0984835	0.258	0.192	1	Two-sided Wilcoxon test	0.25	5
Zfp689	0.0135885	-0.0106731	0.039	0.076	1	Two-sided Wilcoxon test	0.25	5
Pcf11	0.0136026	-0.108736	0.61	0.685	1	Two-sided Wilcoxon test	0.25	5
Prrc2c	0.0136589	-0.108345	0.928	0.957	1	Two-sided Wilcoxon test	0.25	5
Zfp646	0.0136897	-0.0714352	0.238	0.318	1	Two-sided Wilcoxon test	0.25	5
Peak1	0.0136933	-0.148391	0.819	0.841	1	Two-sided Wilcoxon test	0.25	5
March2	0.0137036	-0.0249309	0.418	0.52	1	Two-sided Wilcoxon test	0.25	5
2510002D24Rik	0.0137091	-0.0544177	0.202	0.278	1	Two-sided Wilcoxon test	0.25	5
Zfp397	0.0137218	-0.060143	0.286	0.364	1	Two-sided Wilcoxon test	0.25	5
Sec13	0.0137536	0.126666	0.73	0.705	1	Two-sided Wilcoxon test	0.25	5
Tmem128	0.0137779	-0.0900925	0.483	0.57	1	Two-sided Wilcoxon test	0.25	5
Abi1	0.0137877	-0.120624	0.752	0.791	1	Two-sided Wilcoxon test	0.25	5
B4gat1	0.0138448	-0.0629557	0.204	0.275	1	Two-sided Wilcoxon test	0.25	5
Stat5a	0.0138812	0.00223385	0.085	0.139	1	Two-sided Wilcoxon test	0.25	5
Ptpn13	0.0138938	0.0811726	0.12	0.07	1	Two-sided Wilcoxon test	0.25	5
Glrx5	0.0139078	0.113787	0.748	0.725	1	Two-sided Wilcoxon test	0.25	5
Ccdc47	0.0139138	-0.109421	0.634	0.692	1	Two-sided Wilcoxon test	0.25	5
Macf1	0.013937	-0.125598	0.976	0.954	1	Two-sided Wilcoxon test	0.25	5
Ednrb	0.0139473	-0.212589	0.76	0.788	1	Two-sided Wilcoxon test	0.25	5
Zfp961	0.0139571	-0.0189229	0.192	0.272	1	Two-sided Wilcoxon test	0.25	5
Gale	0.0139652	-0.0612955	0.189	0.262	1	Two-sided Wilcoxon test	0.25	5
Pam	0.0140133	-0.182789	0.723	0.788	1	Two-sided Wilcoxon test	0.25	5
Megf11	0.0140602	-0.0855663	0.069	0.116	1	Two-sided Wilcoxon test	0.25	5
Dctn3	0.0140672	0.114143	0.73	0.675	1	Two-sided Wilcoxon test	0.25	5
LTO1	0.0141102	-0.0206515	0.17	0.245	1	Two-sided Wilcoxon test	0.25	5
Tpx2	0.0141544	0.117531	0.497	0.414	1	Two-sided Wilcoxon test	0.25	5
Scmh1	0.0142149	-0.175369	0.755	0.795	1	Two-sided Wilcoxon test	0.25	5
1110004F10Rik	0.0142435	0.108429	0.826	0.791	1	Two-sided Wilcoxon test	0.25	5
Zfp638	0.0142684	-0.15087	0.834	0.848	1	Two-sided Wilcoxon test	0.25	5
Syne2	0.0143149	-0.126616	0.832	0.861	1	Two-sided Wilcoxon test	0.25	5
Stip1	0.0143344	0.160166	0.782	0.742	1	Two-sided Wilcoxon test	0.25	5
Abca1	0.0143736	-0.119891	0.229	0.301	1	Two-sided Wilcoxon test	0.25	5
Renbp	0.0143998	-0.0346062	0.272	0.371	1	Two-sided Wilcoxon test	0.25	5
Plekhh3	0.0144052	-0.0386615	0.115	0.179	1	Two-sided Wilcoxon test	0.25	5
Rnd2	0.01443	-0.0374117	0.172	0.245	1	Two-sided Wilcoxon test	0.25	5
Slc25a53	0.0144541	-0.0526483	0.258	0.331	1	Two-sided Wilcoxon test	0.25	5
Slc25a46	0.0144635	-0.0190842	0.372	0.483	1	Two-sided Wilcoxon test	0.25	5
Pogz	0.0144665	-0.0840164	0.517	0.613	1	Two-sided Wilcoxon test	0.25	5
Tada3	0.0144961	-0.0339215	0.257	0.338	1	Two-sided Wilcoxon test	0.25	5
Pdhx	0.0145042	-0.0966069	0.35	0.427	1	Two-sided Wilcoxon test	0.25	5
Cabp1	0.0146242	-0.0273012	0.059	0.103	1	Two-sided Wilcoxon test	0.25	5
Paxx	0.0146315	-0.0359063	0.121	0.182	1	Two-sided Wilcoxon test	0.25	5
Vti1b	0.014664	-0.0864268	0.462	0.543	1	Two-sided Wilcoxon test	0.25	5
Gm19710	0.0146762	-0.125605	0.17	0.235	1	Two-sided Wilcoxon test	0.25	5
Pcbp2	0.0147123	0.097819	0.916	0.904	1	Two-sided Wilcoxon test	0.25	5
Rsrc2	0.014716	-0.120623	0.867	0.887	1	Two-sided Wilcoxon test	0.25	5
Npepl1	0.0147214	-0.0476213	0.374	0.474	1	Two-sided Wilcoxon test	0.25	5
Trp53inp1	0.0147612	-0.0103946	0.23	0.318	1	Two-sided Wilcoxon test	0.25	5
Rgs3	0.0147768	-0.160954	0.728	0.785	1	Two-sided Wilcoxon test	0.25	5
Maz	0.0147941	-0.0667804	0.387	0.483	1	Two-sided Wilcoxon test	0.25	5
Pacc1	0.0148375	-0.0488804	0.213	0.295	1	Two-sided Wilcoxon test	0.25	5
Trmo	0.0148748	-0.0346539	0.044	0.083	1	Two-sided Wilcoxon test	0.25	5
Zfand6	0.0149262	-0.086248	0.822	0.858	1	Two-sided Wilcoxon test	0.25	5
Zfand2a	0.0149542	-0.0505404	0.173	0.245	1	Two-sided Wilcoxon test	0.25	5
Ppcs	0.0149558	-0.0172708	0.22	0.308	1	Two-sided Wilcoxon test	0.25	5
Alcam	0.0149861	0.236014	0.245	0.182	1	Two-sided Wilcoxon test	0.25	5
Sipa1	0.0150146	-0.0844411	0.467	0.56	1	Two-sided Wilcoxon test	0.25	5
Mtif3	0.0150291	-0.0508584	0.121	0.182	1	Two-sided Wilcoxon test	0.25	5
Ndufb11	0.015058	0.136644	0.83	0.768	1	Two-sided Wilcoxon test	0.25	5
Fbxw2	0.0150725	-0.0876543	0.525	0.626	1	Two-sided Wilcoxon test	0.25	5
Tacc2	0.0151075	-0.0905885	0.561	0.659	1	Two-sided Wilcoxon test	0.25	5
Scn1b	0.0151159	-0.0608065	0.257	0.338	1	Two-sided Wilcoxon test	0.25	5
Pcbp4	0.0151194	0.138991	0.598	0.579	1	Two-sided Wilcoxon test	0.25	5
Tbc1d7	0.0151214	-0.0518008	0.197	0.272	1	Two-sided Wilcoxon test	0.25	5
Ccnd3	0.0151362	-0.151926	0.727	0.742	1	Two-sided Wilcoxon test	0.25	5
Tmcc3	0.015196	-0.158674	0.208	0.275	1	Two-sided Wilcoxon test	0.25	5
Fam220a.1	0.015251	-0.0449688	0.049	0.089	1	Two-sided Wilcoxon test	0.25	5
Rasgrp3	0.0152699	-0.126624	0.808	0.825	1	Two-sided Wilcoxon test	0.25	5
Klhl3	0.0152887	-0.150533	0.353	0.434	1	Two-sided Wilcoxon test	0.25	5
Snhg17	0.0153239	-0.0585164	0.182	0.252	1	Two-sided Wilcoxon test	0.25	5
D8Ertd738e	0.0153407	0.116472	0.831	0.821	1	Two-sided Wilcoxon test	0.25	5
Pex6	0.0153546	-0.0349411	0.24	0.328	1	Two-sided Wilcoxon test	0.25	5
Idh1	0.01536	0.132918	0.534	0.503	1	Two-sided Wilcoxon test	0.25	5
Flt4	0.0153609	-0.0654448	0.377	0.477	1	Two-sided Wilcoxon test	0.25	5
Selenbp1	0.0153619	-0.0439955	0.248	0.328	1	Two-sided Wilcoxon test	0.25	5
A630012P03Rik	0.0153704	0.0508134	0.134	0.079	1	Two-sided Wilcoxon test	0.25	5
Trp53bp1	0.0153803	-0.136316	0.533	0.619	1	Two-sided Wilcoxon test	0.25	5
Zfp952	0.0153811	-0.0411971	0.161	0.228	1	Two-sided Wilcoxon test	0.25	5
Rybp	0.0153884	-0.100854	0.63	0.722	1	Two-sided Wilcoxon test	0.25	5
Gtf2a1	0.0154085	-0.0752478	0.41	0.497	1	Two-sided Wilcoxon test	0.25	5
Unc5d	0.0154239	0.0266221	0.092	0.046	1	Two-sided Wilcoxon test	0.25	5
Srrm1	0.0154553	0.108618	0.884	0.861	1	Two-sided Wilcoxon test	0.25	5
Ebna1bp2	0.0154773	-0.104229	0.567	0.639	1	Two-sided Wilcoxon test	0.25	5
Ost4	0.0154892	0.116503	0.715	0.695	1	Two-sided Wilcoxon test	0.25	5
Pgm2	0.0155376	-0.120926	0.473	0.536	1	Two-sided Wilcoxon test	0.25	5
Selenom	0.0155393	-0.0869646	0.445	0.55	1	Two-sided Wilcoxon test	0.25	5
Slit2	0.0155639	0.27623	0.735	0.679	1	Two-sided Wilcoxon test	0.25	5
Insig2	0.0155837	-0.0333686	0.21	0.291	1	Two-sided Wilcoxon test	0.25	5
Ncor2	0.0156056	-0.0889211	0.486	0.583	1	Two-sided Wilcoxon test	0.25	5
Daam2	0.0156531	0.0369002	0.077	0.036	1	Two-sided Wilcoxon test	0.25	5
Piezo1	0.0157195	-0.089346	0.74	0.805	1	Two-sided Wilcoxon test	0.25	5
Ppp1r7	0.0157225	0.083939	0.654	0.576	1	Two-sided Wilcoxon test	0.25	5
Pbxip1	0.0157246	-0.115622	0.277	0.351	1	Two-sided Wilcoxon test	0.25	5
Zfp692	0.0157305	-0.0861861	0.18	0.245	1	Two-sided Wilcoxon test	0.25	5
Nr2c1	0.0157863	-0.0720644	0.265	0.334	1	Two-sided Wilcoxon test	0.25	5
Pcnp	0.0157887	-0.0803203	0.728	0.772	1	Two-sided Wilcoxon test	0.25	5
Akt3	0.0157888	-0.206034	0.843	0.858	1	Two-sided Wilcoxon test	0.25	5
Lrrc8a	0.015818	-0.0658501	0.425	0.526	1	Two-sided Wilcoxon test	0.25	5
Cd53	0.0158182	-0.0119894	0.047	0.086	1	Two-sided Wilcoxon test	0.25	5
Gm43376	0.0158198	-0.0601453	0.031	0.063	1	Two-sided Wilcoxon test	0.25	5
Trp53rka	0.0158271	-0.0238036	0.158	0.228	1	Two-sided Wilcoxon test	0.25	5
Wasf3	0.0159736	0.0276464	0.053	0.02	1	Two-sided Wilcoxon test	0.25	5
Slc31a1	0.0159786	-0.06816	0.449	0.536	1	Two-sided Wilcoxon test	0.25	5
Gabpb1	0.0160104	-0.129355	0.659	0.735	1	Two-sided Wilcoxon test	0.25	5
Bex3	0.0160375	0.128213	0.908	0.881	1	Two-sided Wilcoxon test	0.25	5
Rab11fip2	0.0160435	-0.0823309	0.269	0.358	1	Two-sided Wilcoxon test	0.25	5
Msantd2	0.0160532	-0.170619	0.59	0.669	1	Two-sided Wilcoxon test	0.25	5
Ror2	0.0160669	0.132269	0.341	0.272	1	Two-sided Wilcoxon test	0.25	5
Deptor	0.016144	-0.0276945	0.067	0.113	1	Two-sided Wilcoxon test	0.25	5
Asap2	0.0161566	-0.100417	0.792	0.834	1	Two-sided Wilcoxon test	0.25	5
Mapk12	0.0162643	-0.0627119	0.246	0.325	1	Two-sided Wilcoxon test	0.25	5
Rrnad1	0.0162805	-0.0576342	0.152	0.219	1	Two-sided Wilcoxon test	0.25	5
Plcl1	0.0163053	0.293275	0.357	0.288	1	Two-sided Wilcoxon test	0.25	5
S100a13	0.0163118	0.157587	0.49	0.454	1	Two-sided Wilcoxon test	0.25	5
Ndor1	0.0163365	-0.068537	0.146	0.209	1	Two-sided Wilcoxon test	0.25	5
Kansl1l	0.0163777	-0.090492	0.533	0.613	1	Two-sided Wilcoxon test	0.25	5
Gpat4	0.016479	-0.0727757	0.454	0.546	1	Two-sided Wilcoxon test	0.25	5
Ywhab	0.016524	0.109278	0.876	0.871	1	Two-sided Wilcoxon test	0.25	5
Ppp2r5e	0.0165243	-0.120302	0.702	0.788	1	Two-sided Wilcoxon test	0.25	5
Gpr18	0.0165316	-0.050571	0.101	0.156	1	Two-sided Wilcoxon test	0.25	5
Zbtb20	0.0165435	-0.18349	0.87	0.901	1	Two-sided Wilcoxon test	0.25	5
Eng	0.0166135	-0.149047	0.791	0.818	1	Two-sided Wilcoxon test	0.25	5
Trabd	0.0166209	-0.0326673	0.336	0.437	1	Two-sided Wilcoxon test	0.25	5
Gm48708	0.0166261	-0.0389129	0.031	0.063	1	Two-sided Wilcoxon test	0.25	5
Tm6sf1	0.0166264	-0.0420013	0.326	0.407	1	Two-sided Wilcoxon test	0.25	5
4930473A02Rik	0.0166949	-0.00541259	0.049	0.089	1	Two-sided Wilcoxon test	0.25	5
Cyp20a1	0.0167908	-0.157576	0.688	0.732	1	Two-sided Wilcoxon test	0.25	5
Gm16541	0.0168117	-0.0471586	0.051	0.089	1	Two-sided Wilcoxon test	0.25	5
Pdcl3	0.0168292	-0.0581277	0.537	0.603	1	Two-sided Wilcoxon test	0.25	5
Tm9sf1	0.016857	-0.0370749	0.294	0.384	1	Two-sided Wilcoxon test	0.25	5
Tbcel	0.0168601	-0.054972	0.165	0.232	1	Two-sided Wilcoxon test	0.25	5
Zfp981	0.0168833	-0.0188651	0.024	0.053	1	Two-sided Wilcoxon test	0.25	5
Wdr83os	0.0169168	0.120903	0.675	0.649	1	Two-sided Wilcoxon test	0.25	5
Colgalt2	0.0169421	-0.0695152	0.18	0.252	1	Two-sided Wilcoxon test	0.25	5
Cfap20	0.0169699	-0.171269	0.7	0.745	1	Two-sided Wilcoxon test	0.25	5
Mylip	0.0169717	-0.0628989	0.181	0.248	1	Two-sided Wilcoxon test	0.25	5
Slmap	0.0169874	-0.112214	0.698	0.742	1	Two-sided Wilcoxon test	0.25	5
Tsc22d2	0.0169884	-0.126156	0.768	0.795	1	Two-sided Wilcoxon test	0.25	5
Pdha1	0.0170309	-0.120234	0.547	0.609	1	Two-sided Wilcoxon test	0.25	5
Lgals8	0.0170566	-0.0966485	0.354	0.434	1	Two-sided Wilcoxon test	0.25	5
Stard5	0.0171139	-0.0519449	0.123	0.182	1	Two-sided Wilcoxon test	0.25	5
Pdk3	0.0171184	0.103383	0.461	0.387	1	Two-sided Wilcoxon test	0.25	5
Abcc5	0.0171251	-0.0793324	0.352	0.437	1	Two-sided Wilcoxon test	0.25	5
Fam219b	0.0171443	-0.0400689	0.12	0.175	1	Two-sided Wilcoxon test	0.25	5
Opa1	0.0171523	-0.085491	0.61	0.666	1	Two-sided Wilcoxon test	0.25	5
Ncoa2	0.0171742	-0.135421	0.766	0.851	1	Two-sided Wilcoxon test	0.25	5
Kmt5a	0.0171747	0.0947726	0.595	0.533	1	Two-sided Wilcoxon test	0.25	5
Wdr20	0.0171794	-0.0330847	0.333	0.411	1	Two-sided Wilcoxon test	0.25	5
Pih1d1	0.0171798	0.0846247	0.417	0.368	1	Two-sided Wilcoxon test	0.25	5
Hif3a	0.0172038	-0.0469482	0.349	0.434	1	Two-sided Wilcoxon test	0.25	5
Mgat5	0.0172213	-0.135506	0.652	0.719	1	Two-sided Wilcoxon test	0.25	5
Ranbp9	0.0172292	-0.138043	0.627	0.725	1	Two-sided Wilcoxon test	0.25	5
Zfp182	0.017233	-0.0807765	0.218	0.288	1	Two-sided Wilcoxon test	0.25	5
Bub1	0.0172379	0.0654949	0.41	0.318	1	Two-sided Wilcoxon test	0.25	5
Thbd	0.0172575	-0.0688466	0.137	0.195	1	Two-sided Wilcoxon test	0.25	5
Id3	0.0172692	-0.168676	0.883	0.851	1	Two-sided Wilcoxon test	0.25	5
Cop1	0.0173462	-0.168175	0.799	0.841	1	Two-sided Wilcoxon test	0.25	5
Oaz1	0.0173688	0.0666798	0.945	0.954	1	Two-sided Wilcoxon test	0.25	5
Zbtb11	0.0173697	0.0651535	0.699	0.656	1	Two-sided Wilcoxon test	0.25	5
Sec22a	0.0173704	0.100221	0.426	0.364	1	Two-sided Wilcoxon test	0.25	5
Man2b1	0.0173889	-0.0448515	0.379	0.474	1	Two-sided Wilcoxon test	0.25	5
Psenen	0.0173972	0.101438	0.763	0.722	1	Two-sided Wilcoxon test	0.25	5
Marcks	0.0173997	0.113694	0.907	0.894	1	Two-sided Wilcoxon test	0.25	5
Decr1	0.0174172	-0.0609332	0.33	0.421	1	Two-sided Wilcoxon test	0.25	5
Foxn2	0.0174804	-0.116303	0.479	0.589	1	Two-sided Wilcoxon test	0.25	5
Arl6ip6	0.0174877	-0.0521033	0.567	0.675	1	Two-sided Wilcoxon test	0.25	5
Rhox5	0.017491	-0.0253233	0.045	0.083	1	Two-sided Wilcoxon test	0.25	5
H2-M3	0.0174982	-0.0108828	0.024	0.053	1	Two-sided Wilcoxon test	0.25	5
Ahnak	0.017527	-0.108427	0.443	0.53	1	Two-sided Wilcoxon test	0.25	5
Acadvl	0.017542	-0.0779942	0.2	0.268	1	Two-sided Wilcoxon test	0.25	5
Hook3	0.0175643	-0.172238	0.782	0.798	1	Two-sided Wilcoxon test	0.25	5
Slc35a3	0.0175738	-0.149906	0.433	0.526	1	Two-sided Wilcoxon test	0.25	5
Wdr83	0.0175832	-0.0162233	0.204	0.278	1	Two-sided Wilcoxon test	0.25	5
Eif1b	0.0176017	0.132134	0.81	0.758	1	Two-sided Wilcoxon test	0.25	5
Jag2	0.0176045	-0.0465759	0.048	0.086	1	Two-sided Wilcoxon test	0.25	5
Zfp652	0.0176103	-0.151135	0.605	0.646	1	Two-sided Wilcoxon test	0.25	5
Map4k3	0.0176307	-0.129942	0.755	0.818	1	Two-sided Wilcoxon test	0.25	5
Slc15a4	0.0177394	-0.0359519	0.177	0.245	1	Two-sided Wilcoxon test	0.25	5
Slc17a5	0.0177617	-0.0645948	0.277	0.361	1	Two-sided Wilcoxon test	0.25	5
Crls1	0.0178103	-0.0457398	0.246	0.328	1	Two-sided Wilcoxon test	0.25	5
Adgre5	0.0178849	-0.108872	0.24	0.315	1	Two-sided Wilcoxon test	0.25	5
Zfp53	0.0179062	-0.0297832	0.152	0.219	1	Two-sided Wilcoxon test	0.25	5
Grip1os1	0.0179219	-0.0343036	0.043	0.079	1	Two-sided Wilcoxon test	0.25	5
Acvr1	0.017954	-0.200918	0.811	0.851	1	Two-sided Wilcoxon test	0.25	5
B3galt6	0.018029	-0.0425906	0.168	0.235	1	Two-sided Wilcoxon test	0.25	5
Pcdhga2	0.0180407	-0.0394321	0.036	0.07	1	Two-sided Wilcoxon test	0.25	5
Mbnl1	0.018077	-0.126883	0.711	0.815	1	Two-sided Wilcoxon test	0.25	5
Srsf7	0.0181517	-0.171485	0.889	0.901	1	Two-sided Wilcoxon test	0.25	5
Ptpru	0.0182308	0.0345245	0.072	0.033	1	Two-sided Wilcoxon test	0.25	5
Wfs1	0.0182512	-0.0292053	0.045	0.083	1	Two-sided Wilcoxon test	0.25	5
Rnft2	0.0182699	-0.0540497	0.065	0.109	1	Two-sided Wilcoxon test	0.25	5
Gadd45g	0.0182864	0.0311433	0.214	0.301	1	Two-sided Wilcoxon test	0.25	5
Tk1	0.018298	0.103624	0.462	0.404	1	Two-sided Wilcoxon test	0.25	5
1810034E14Rik	0.0183451	-0.0333904	0.134	0.192	1	Two-sided Wilcoxon test	0.25	5
Ppp3r1	0.0183637	-0.0778501	0.462	0.56	1	Two-sided Wilcoxon test	0.25	5
Yars2	0.018378	-0.0277546	0.177	0.255	1	Two-sided Wilcoxon test	0.25	5
Bet1l	0.018401	-0.0120115	0.345	0.437	1	Two-sided Wilcoxon test	0.25	5
Galc	0.0184074	-0.0306691	0.246	0.341	1	Two-sided Wilcoxon test	0.25	5
Ccny	0.018474	-0.152671	0.859	0.887	1	Two-sided Wilcoxon test	0.25	5
Eid2	0.0184786	-0.0687923	0.309	0.401	1	Two-sided Wilcoxon test	0.25	5
Fastk	0.018488	0.0998319	0.471	0.424	1	Two-sided Wilcoxon test	0.25	5
Syne1	0.0185015	-0.0559817	0.49	0.593	1	Two-sided Wilcoxon test	0.25	5
Itgb8	0.0185255	0.0193339	0.072	0.033	1	Two-sided Wilcoxon test	0.25	5
Hemgn	0.0185803	0.0665672	0.08	0.04	1	Two-sided Wilcoxon test	0.25	5
Rrp7a	0.0186015	-0.039352	0.352	0.434	1	Two-sided Wilcoxon test	0.25	5
Tvp23b	0.0186072	-0.0786276	0.453	0.533	1	Two-sided Wilcoxon test	0.25	5
Cyb561a3	0.0186128	-0.0254256	0.073	0.119	1	Two-sided Wilcoxon test	0.25	5
Mpp1	0.0186912	-0.0872257	0.316	0.394	1	Two-sided Wilcoxon test	0.25	5
Gnb4	0.0186982	-0.101791	0.473	0.57	1	Two-sided Wilcoxon test	0.25	5
Wwox	0.018721	-0.17371	0.728	0.781	1	Two-sided Wilcoxon test	0.25	5
Gm43149	0.0187786	-0.0170575	0.039	0.073	1	Two-sided Wilcoxon test	0.25	5
Erlin2	0.0187885	-0.0616072	0.37	0.457	1	Two-sided Wilcoxon test	0.25	5
Cradd	0.018828	-0.0438825	0.31	0.394	1	Two-sided Wilcoxon test	0.25	5
Map3k2	0.0188281	-0.0798649	0.622	0.689	1	Two-sided Wilcoxon test	0.25	5
Rab14	0.0188295	-0.107495	0.851	0.848	1	Two-sided Wilcoxon test	0.25	5
Katnal1	0.0188358	-0.00301389	0.165	0.235	1	Two-sided Wilcoxon test	0.25	5
Nbr1	0.0188363	-0.0883557	0.473	0.556	1	Two-sided Wilcoxon test	0.25	5
Tbk1	0.0188552	-0.0960889	0.463	0.553	1	Two-sided Wilcoxon test	0.25	5
Alkbh7	0.0188638	-0.0314469	0.158	0.222	1	Two-sided Wilcoxon test	0.25	5
Fnbp1	0.0188722	-0.135857	0.743	0.788	1	Two-sided Wilcoxon test	0.25	5
Ofd1	0.0188725	-0.0117342	0.256	0.338	1	Two-sided Wilcoxon test	0.25	5
Aldh1a2	0.0189157	0.0706992	0.08	0.04	1	Two-sided Wilcoxon test	0.25	5
Fgf12	0.0189359	0.0394138	0.061	0.026	1	Two-sided Wilcoxon test	0.25	5
Prr12	0.018979	-0.0588574	0.397	0.49	1	Two-sided Wilcoxon test	0.25	5
Casp9	0.018992	-0.0161532	0.152	0.219	1	Two-sided Wilcoxon test	0.25	5
Ulk2	0.0190599	-0.0957018	0.511	0.586	1	Two-sided Wilcoxon test	0.25	5
Gfod1	0.0190738	-0.123495	0.22	0.298	1	Two-sided Wilcoxon test	0.25	5
Rxylt1	0.0190866	-0.0762507	0.418	0.503	1	Two-sided Wilcoxon test	0.25	5
Tpmt	0.0190893	-0.0238255	0.153	0.219	1	Two-sided Wilcoxon test	0.25	5
Zbtb1	0.0191057	-0.0296267	0.491	0.586	1	Two-sided Wilcoxon test	0.25	5
Ints12	0.0191102	-0.0333853	0.182	0.255	1	Two-sided Wilcoxon test	0.25	5
Ttc19	0.0191576	-0.139231	0.529	0.589	1	Two-sided Wilcoxon test	0.25	5
Vcpip1	0.0192679	-0.0540081	0.358	0.457	1	Two-sided Wilcoxon test	0.25	5
Far1	0.0192704	-0.125544	0.603	0.699	1	Two-sided Wilcoxon test	0.25	5
Flii	0.0193086	-0.071293	0.485	0.56	1	Two-sided Wilcoxon test	0.25	5
Pcdh9	0.0194158	0.19707	0.076	0.036	1	Two-sided Wilcoxon test	0.25	5
Elf4	0.0194342	-0.106309	0.373	0.454	1	Two-sided Wilcoxon test	0.25	5
Cept1	0.0194474	-0.0982001	0.385	0.464	1	Two-sided Wilcoxon test	0.25	5
Galnt11	0.019463	-0.0408812	0.305	0.384	1	Two-sided Wilcoxon test	0.25	5
Hmgn2	0.0194674	-0.158964	0.871	0.871	1	Two-sided Wilcoxon test	0.25	5
Ube3a	0.0194782	-0.0882983	0.83	0.871	1	Two-sided Wilcoxon test	0.25	5
Ap3b1	0.0194797	-0.130949	0.815	0.834	1	Two-sided Wilcoxon test	0.25	5
Aldoa	0.0195274	-0.158342	0.9	0.914	1	Two-sided Wilcoxon test	0.25	5
Disp1	0.0196236	-0.0310307	0.289	0.377	1	Two-sided Wilcoxon test	0.25	5
Nptn	0.0196383	-0.17069	0.724	0.778	1	Two-sided Wilcoxon test	0.25	5
Ppme1	0.019653	-0.116379	0.551	0.639	1	Two-sided Wilcoxon test	0.25	5
Arvcf	0.0196875	-0.0108837	0.051	0.089	1	Two-sided Wilcoxon test	0.25	5
S1pr3	0.0196988	0.0385224	0.052	0.02	1	Two-sided Wilcoxon test	0.25	5
Lrmda	0.0197075	-0.318429	0.618	0.646	1	Two-sided Wilcoxon test	0.25	5
Pik3cg	0.0197299	-0.0126726	0.052	0.093	1	Two-sided Wilcoxon test	0.25	5
Pex11a	0.0197587	-0.0368396	0.029	0.06	1	Two-sided Wilcoxon test	0.25	5
Ftl1	0.0197753	0.112118	0.991	0.967	1	Two-sided Wilcoxon test	0.25	5
Glmp	0.0197827	-0.0447315	0.369	0.457	1	Two-sided Wilcoxon test	0.25	5
Zdhhc12	0.019788	-0.0448735	0.361	0.45	1	Two-sided Wilcoxon test	0.25	5
Rpl9	0.0197923	-0.0807613	0.971	0.983	1	Two-sided Wilcoxon test	0.25	5
Gm11209	0.0198164	-0.0282239	0.027	0.056	1	Two-sided Wilcoxon test	0.25	5
C1qtnf6	0.0198242	-0.0801019	0.334	0.421	1	Two-sided Wilcoxon test	0.25	5
Mcc	0.0198459	-0.356658	0.796	0.821	1	Two-sided Wilcoxon test	0.25	5
Mbd2	0.0198603	-0.0950472	0.494	0.593	1	Two-sided Wilcoxon test	0.25	5
Acsf2	0.0198741	-0.0589849	0.105	0.159	1	Two-sided Wilcoxon test	0.25	5
Fnbp1l	0.0198884	-0.134307	0.874	0.904	1	Two-sided Wilcoxon test	0.25	5
Ino80d	0.0199033	-0.136515	0.549	0.632	1	Two-sided Wilcoxon test	0.25	5
Prr15	0.0199444	-0.140122	0.233	0.295	1	Two-sided Wilcoxon test	0.25	5
Bbs7	0.0199598	-0.0343024	0.15	0.209	1	Two-sided Wilcoxon test	0.25	5
Ccdc141	0.0199989	0.0838255	0.324	0.268	1	Two-sided Wilcoxon test	0.25	5
Fam126a	0.0199998	-0.0982756	0.386	0.474	1	Two-sided Wilcoxon test	0.25	5
Gm46430	0.0200242	-0.00707804	0.099	0.152	1	Two-sided Wilcoxon test	0.25	5
Abhd17a	0.02007	-0.123993	0.686	0.709	1	Two-sided Wilcoxon test	0.25	5
Itfg1	0.0201071	-0.0608206	0.509	0.603	1	Two-sided Wilcoxon test	0.25	5
Egln1	0.0201399	-0.108002	0.438	0.533	1	Two-sided Wilcoxon test	0.25	5
Rabl3	0.0201575	-0.0789379	0.285	0.361	1	Two-sided Wilcoxon test	0.25	5
Cfap45	0.0202542	-0.0330718	0.162	0.228	1	Two-sided Wilcoxon test	0.25	5
Fbxo16	0.0202579	-0.00406387	0.056	0.096	1	Two-sided Wilcoxon test	0.25	5
Micu1	0.0202851	-0.120554	0.487	0.593	1	Two-sided Wilcoxon test	0.25	5
Cope	0.0203047	-0.098352	0.623	0.666	1	Two-sided Wilcoxon test	0.25	5
Gm11361	0.0203162	0.0465069	0.083	0.043	1	Two-sided Wilcoxon test	0.25	5
Prorsd1	0.0203174	-0.0332931	0.172	0.242	1	Two-sided Wilcoxon test	0.25	5
Fdx2	0.0203313	0.119642	0.498	0.46	1	Two-sided Wilcoxon test	0.25	5
Tlcd2	0.0203337	-0.0289645	0.133	0.192	1	Two-sided Wilcoxon test	0.25	5
Gm9889	0.0203666	-0.0125305	0.036	0.07	1	Two-sided Wilcoxon test	0.25	5
Mthfr	0.0203849	-0.0577039	0.136	0.192	1	Two-sided Wilcoxon test	0.25	5
Dph2	0.0203972	-0.00893579	0.057	0.099	1	Two-sided Wilcoxon test	0.25	5
Hdac4	0.0204461	-0.1023	0.525	0.613	1	Two-sided Wilcoxon test	0.25	5
Zfp820	0.0204614	-0.0668434	0.222	0.295	1	Two-sided Wilcoxon test	0.25	5
Psme4	0.0204718	-0.125979	0.868	0.901	1	Two-sided Wilcoxon test	0.25	5
Ro60	0.0205488	-0.128796	0.389	0.49	1	Two-sided Wilcoxon test	0.25	5
Ccdc14	0.0205568	-0.0436951	0.16	0.222	1	Two-sided Wilcoxon test	0.25	5
Mtch1	0.0205987	-0.114959	0.844	0.834	1	Two-sided Wilcoxon test	0.25	5
Kctd9	0.0206189	-0.032958	0.137	0.199	1	Two-sided Wilcoxon test	0.25	5
Serpine2	0.0206498	0.11272	0.362	0.305	1	Two-sided Wilcoxon test	0.25	5
Rb1cc1	0.0206531	-0.111395	0.684	0.742	1	Two-sided Wilcoxon test	0.25	5
Vps37c	0.0206747	-0.0827763	0.161	0.222	1	Two-sided Wilcoxon test	0.25	5
Nckap5l	0.0207297	-0.13416	0.349	0.414	1	Two-sided Wilcoxon test	0.25	5
Mrpl57	0.0207353	0.125607	0.578	0.54	1	Two-sided Wilcoxon test	0.25	5
Cracr2b	0.0207753	-0.0798813	0.281	0.361	1	Two-sided Wilcoxon test	0.25	5
Mfsd13a	0.0208193	-0.0415539	0.093	0.142	1	Two-sided Wilcoxon test	0.25	5
Cnot7	0.0208357	-0.145958	0.551	0.629	1	Two-sided Wilcoxon test	0.25	5
Mettl22	0.0208613	-0.0431603	0.088	0.136	1	Two-sided Wilcoxon test	0.25	5
Sav1	0.0209658	-0.106911	0.421	0.503	1	Two-sided Wilcoxon test	0.25	5
Gm43848	0.0209935	-0.034038	0.041	0.076	1	Two-sided Wilcoxon test	0.25	5
Ppp2r5d	0.0210469	0.0572212	0.329	0.268	1	Two-sided Wilcoxon test	0.25	5
Fmc1	0.0210639	0.0998953	0.401	0.341	1	Two-sided Wilcoxon test	0.25	5
Cd302	0.0210788	-0.0944394	0.337	0.424	1	Two-sided Wilcoxon test	0.25	5
Yju2	0.021115	-0.0551926	0.24	0.315	1	Two-sided Wilcoxon test	0.25	5
Zfp512b	0.0211286	-0.013924	0.272	0.358	1	Two-sided Wilcoxon test	0.25	5
Emg1	0.0211616	0.150059	0.764	0.725	1	Two-sided Wilcoxon test	0.25	5
Fam13c	0.0211885	-0.131872	0.454	0.507	1	Two-sided Wilcoxon test	0.25	5
Trpm3	0.0212213	0.192609	0.66	0.579	1	Two-sided Wilcoxon test	0.25	5
Gm26590	0.0212303	-0.0698115	0.035	0.066	1	Two-sided Wilcoxon test	0.25	5
Zfp790	0.0212726	-0.0359013	0.111	0.166	1	Two-sided Wilcoxon test	0.25	5
Bcr	0.0212904	-0.0984915	0.603	0.695	1	Two-sided Wilcoxon test	0.25	5
Atg9a	0.0213146	-0.0370004	0.088	0.136	1	Two-sided Wilcoxon test	0.25	5
Taf4	0.0213515	-0.0707949	0.197	0.262	1	Two-sided Wilcoxon test	0.25	5
1110065P20Rik	0.0213821	-0.0784436	0.36	0.44	1	Two-sided Wilcoxon test	0.25	5
1110012L19Rik	0.02141	-0.0155883	0.156	0.222	1	Two-sided Wilcoxon test	0.25	5
Copg2	0.0214185	-0.145713	0.493	0.563	1	Two-sided Wilcoxon test	0.25	5
Ociad2	0.0214221	-0.0498036	0.099	0.149	1	Two-sided Wilcoxon test	0.25	5
Nrde2	0.0214727	-0.00521109	0.221	0.305	1	Two-sided Wilcoxon test	0.25	5
Zfp57	0.0214731	-0.0931044	0.39	0.467	1	Two-sided Wilcoxon test	0.25	5
Prpf40b	0.0214756	-0.0859884	0.23	0.298	1	Two-sided Wilcoxon test	0.25	5
Rasgrp2	0.0215008	0.134972	0.523	0.48	1	Two-sided Wilcoxon test	0.25	5
Fam114a1	0.0215317	-0.108619	0.554	0.632	1	Two-sided Wilcoxon test	0.25	5
Rbm12b2	0.0215508	-0.0558139	0.104	0.152	1	Two-sided Wilcoxon test	0.25	5
B3galt1	0.0215783	0.0281358	0.228	0.159	1	Two-sided Wilcoxon test	0.25	5
Gm16576	0.0216146	-0.0205948	0.029	0.06	1	Two-sided Wilcoxon test	0.25	5
Fbl	0.0216326	0.136318	0.795	0.748	1	Two-sided Wilcoxon test	0.25	5
Man2c1os	0.0216617	-0.0856614	0.1	0.149	1	Two-sided Wilcoxon test	0.25	5
Pnkd	0.0217587	0.104505	0.545	0.474	1	Two-sided Wilcoxon test	0.25	5
Knl1	0.021824	0.146468	0.383	0.308	1	Two-sided Wilcoxon test	0.25	5
Tnnt2	0.0218311	-0.189917	0.386	0.467	1	Two-sided Wilcoxon test	0.25	5
Oip5	0.0218493	-0.0255088	0.077	0.123	1	Two-sided Wilcoxon test	0.25	5
Atpaf2	0.0218654	-0.00883142	0.182	0.255	1	Two-sided Wilcoxon test	0.25	5
Fam114a2	0.0218984	-0.112571	0.537	0.606	1	Two-sided Wilcoxon test	0.25	5
Zfp326	0.0218984	-0.110908	0.768	0.825	1	Two-sided Wilcoxon test	0.25	5
Palld	0.0219364	0.106718	0.625	0.589	1	Two-sided Wilcoxon test	0.25	5
Gm15564	0.0219736	-0.0635444	0.174	0.238	1	Two-sided Wilcoxon test	0.25	5
[truncated: 9,899 more rows]

## Sheet: CM1
Supplementary Data 4. DEG in single cell datasets of Rnf20iEC-KO versus control embryos.
gene	p_val	avg_log2FC	pct.1	pct.2	p_val_adj	Test_used	fc.threshold (log2)	min.pct (%)
Xist	7.22706e-73	2.465	0.63	0.006	1.6972e-68	Two-sided Wilcoxon test	0.25	5
Hba-a2	9.77369e-49	1.59943	0.982	0.745	2.29525e-44	Two-sided Wilcoxon test	0.25	5
Hba-a1	2.37083e-41	1.64824	1	0.968	5.56765e-37	Two-sided Wilcoxon test	0.25	5
Rps15a	3.61899e-39	1.06044	0.985	0.962	8.49885e-35	Two-sided Wilcoxon test	0.25	5
Rplp1	5.39079e-38	1.01372	0.976	0.912	1.26597e-33	Two-sided Wilcoxon test	0.25	5
Rpl41	4.00761e-36	0.903903	0.989	0.933	9.41147e-32	Two-sided Wilcoxon test	0.25	5
Rplp2	4.54927e-33	0.797656	0.888	0.768	1.06835e-28	Two-sided Wilcoxon test	0.25	5
Rpl30	5.07938e-31	0.699118	0.95	0.921	1.19284e-26	Two-sided Wilcoxon test	0.25	5
Rps15	2.23465e-30	0.68473	0.956	0.912	5.24785e-26	Two-sided Wilcoxon test	0.25	5
Rpl27	5.08189e-29	0.752981	0.958	0.9	1.19343e-24	Two-sided Wilcoxon test	0.25	5
Fau	6.9236e-28	0.709243	0.966	0.909	1.62594e-23	Two-sided Wilcoxon test	0.25	5
Rps12	1.66564e-27	0.851191	0.969	0.95	3.9116e-23	Two-sided Wilcoxon test	0.25	5
Uty	1.67798e-27	-0.648101	0.331	0.674	3.94056e-23	Two-sided Wilcoxon test	0.25	5
Rps26	4.26229e-27	0.72351	0.956	0.933	1.00096e-22	Two-sided Wilcoxon test	0.25	5
Rpl34	2.00959e-26	0.785704	0.922	0.856	4.71933e-22	Two-sided Wilcoxon test	0.25	5
Rpl32	4.32894e-26	0.79668	0.958	0.906	1.01661e-21	Two-sided Wilcoxon test	0.25	5
Rps19	1.04149e-25	0.824173	0.94	0.836	2.44583e-21	Two-sided Wilcoxon test	0.25	5
Rpl37a	4.61468e-25	0.74418	0.938	0.883	1.08371e-20	Two-sided Wilcoxon test	0.25	5
Rpl31	1.14932e-24	0.68454	0.851	0.677	2.69907e-20	Two-sided Wilcoxon test	0.25	5
Eif2s3y	3.35327e-24	-0.46178	0.235	0.551	7.87482e-20	Two-sided Wilcoxon test	0.25	5
Rps20	2.36031e-22	0.684323	0.984	0.971	5.54295e-18	Two-sided Wilcoxon test	0.25	5
Rpl26	2.76305e-22	0.668013	0.933	0.877	6.48874e-18	Two-sided Wilcoxon test	0.25	5
Hba-x	2.79614e-22	1.1933	1	1	6.56646e-18	Two-sided Wilcoxon test	0.25	5
Cox6b1	5.03309e-22	0.780324	0.86	0.751	1.18197e-17	Two-sided Wilcoxon test	0.25	5
Atp5e	6.00103e-22	0.793027	0.651	0.408	1.40928e-17	Two-sided Wilcoxon test	0.25	5
Rps21	7.58015e-22	0.646423	0.888	0.818	1.78012e-17	Two-sided Wilcoxon test	0.25	5
Rps23	2.75e-21	0.666061	0.929	0.865	6.45811e-17	Two-sided Wilcoxon test	0.25	5
Rps17	1.60656e-20	0.580969	0.95	0.906	3.77285e-16	Two-sided Wilcoxon test	0.25	5
Gng5	1.83941e-20	0.701478	0.877	0.792	4.31966e-16	Two-sided Wilcoxon test	0.25	5
Rps16	1.95816e-20	0.662199	0.972	0.965	4.59854e-16	Two-sided Wilcoxon test	0.25	5
Rps10	3.70162e-20	0.652244	0.938	0.865	8.69289e-16	Two-sided Wilcoxon test	0.25	5
Rpl22	1.21151e-19	0.657307	0.899	0.833	2.84511e-15	Two-sided Wilcoxon test	0.25	5
Snrpe	1.47265e-19	0.598389	0.794	0.66	3.45836e-15	Two-sided Wilcoxon test	0.25	5
Sec61g	1.66176e-19	0.668847	0.765	0.63	3.90249e-15	Two-sided Wilcoxon test	0.25	5
Rpl35a	3.83265e-19	0.743436	0.846	0.768	9.00059e-15	Two-sided Wilcoxon test	0.25	5
Snrpg	6.31467e-19	0.652762	0.756	0.63	1.48294e-14	Two-sided Wilcoxon test	0.25	5
Rpl39	6.51438e-19	0.627756	0.912	0.845	1.52984e-14	Two-sided Wilcoxon test	0.25	5
Il1rapl1	9.83337e-19	-0.508961	0.323	0.595	2.30927e-14	Two-sided Wilcoxon test	0.25	5
Rps27a	1.97192e-18	0.64414	0.977	0.95	4.63085e-14	Two-sided Wilcoxon test	0.25	5
Rps24	2.61118e-18	0.549975	0.987	0.956	6.13209e-14	Two-sided Wilcoxon test	0.25	5
Ndufa4	3.4345e-18	0.662913	0.901	0.85	8.06558e-14	Two-sided Wilcoxon test	0.25	5
Hbb-bt	5.42715e-18	0.876782	0.706	0.428	1.27451e-13	Two-sided Wilcoxon test	0.25	5
Hbb-y	6.43453e-18	1.11363	1	1	1.51109e-13	Two-sided Wilcoxon test	0.25	5
Rps29	9.58822e-18	0.509785	0.943	0.9	2.2517e-13	Two-sided Wilcoxon test	0.25	5
Rpl28	1.68949e-17	0.533433	0.977	0.944	3.96761e-13	Two-sided Wilcoxon test	0.25	5
Cox8a	1.71805e-17	0.646687	0.883	0.824	4.03466e-13	Two-sided Wilcoxon test	0.25	5
Ddx3y	3.09959e-17	-0.423641	0.221	0.469	7.27907e-13	Two-sided Wilcoxon test	0.25	5
Malat1	5.59245e-17	-0.664973	1	1	1.31333e-12	Two-sided Wilcoxon test	0.25	5
Serf2	7.56469e-17	0.647152	0.857	0.821	1.77649e-12	Two-sided Wilcoxon test	0.25	5
Cox7a2	8.22844e-17	0.682489	0.83	0.716	1.93237e-12	Two-sided Wilcoxon test	0.25	5
Rpl21	1.10448e-16	0.511448	0.932	0.894	2.59376e-12	Two-sided Wilcoxon test	0.25	5
Fth1	1.40697e-16	0.51009	0.963	0.974	3.30412e-12	Two-sided Wilcoxon test	0.25	5
5330438D12Rik	2.90967e-16	-0.554592	0.542	0.76	6.83308e-12	Two-sided Wilcoxon test	0.25	5
Rps14	2.92598e-16	0.542849	0.985	0.985	6.87137e-12	Two-sided Wilcoxon test	0.25	5
Rps27l	3.20369e-16	0.649982	0.719	0.578	7.52353e-12	Two-sided Wilcoxon test	0.25	5
Nop10	4.0735e-16	0.543227	0.64	0.449	9.5662e-12	Two-sided Wilcoxon test	0.25	5
Rpl27a	6.52612e-16	0.494525	0.972	0.95	1.53259e-11	Two-sided Wilcoxon test	0.25	5
Rps13	9.95983e-16	0.566559	0.966	0.924	2.33897e-11	Two-sided Wilcoxon test	0.25	5
Hspe1	1.09803e-15	0.562919	0.794	0.648	2.57862e-11	Two-sided Wilcoxon test	0.25	5
Rps8	2.87996e-15	0.5012	0.984	0.988	6.7633e-11	Two-sided Wilcoxon test	0.25	5
Ndufa13	3.78277e-15	0.562757	0.729	0.584	8.88345e-11	Two-sided Wilcoxon test	0.25	5
Cox6c	4.04469e-15	0.505757	0.894	0.845	9.49854e-11	Two-sided Wilcoxon test	0.25	5
Rps11	5.17983e-15	0.557075	0.974	0.938	1.21643e-10	Two-sided Wilcoxon test	0.25	5
Rps27	8.55256e-15	0.54257	0.846	0.771	2.00848e-10	Two-sided Wilcoxon test	0.25	5
Ndufa2	1.00828e-14	0.54821	0.682	0.531	2.36784e-10	Two-sided Wilcoxon test	0.25	5
Tomm7	1.23786e-14	0.526348	0.563	0.375	2.90699e-10	Two-sided Wilcoxon test	0.25	5
Rpl23	1.72142e-14	0.470527	0.981	0.979	4.04258e-10	Two-sided Wilcoxon test	0.25	5
Erbb4	1.72998e-14	-0.582951	0.985	0.997	4.06268e-10	Two-sided Wilcoxon test	0.25	5
Rps25	1.85316e-14	0.502343	0.92	0.868	4.35195e-10	Two-sided Wilcoxon test	0.25	5
Tsix	1.91701e-14	0.241438	0.182	0.012	4.5019e-10	Two-sided Wilcoxon test	0.25	5
Sorbs2os	2.37626e-14	-0.676146	0.536	0.739	5.5804e-10	Two-sided Wilcoxon test	0.25	5
Atp5j2	4.36244e-14	0.539801	0.847	0.757	1.02448e-09	Two-sided Wilcoxon test	0.25	5
Snrpd2	1.80336e-13	0.50964	0.722	0.592	4.235e-09	Two-sided Wilcoxon test	0.25	5
Tmem258	1.929e-13	0.475264	0.664	0.501	4.53007e-09	Two-sided Wilcoxon test	0.25	5
Atp5mpl	2.0929e-13	0.579622	0.683	0.566	4.91496e-09	Two-sided Wilcoxon test	0.25	5
Atpif1	2.70243e-13	0.447783	0.841	0.789	6.34639e-09	Two-sided Wilcoxon test	0.25	5
Sec61b	4.27847e-13	0.538034	0.596	0.413	1.00476e-08	Two-sided Wilcoxon test	0.25	5
Rpl18	4.91054e-13	0.444722	0.968	0.927	1.15319e-08	Two-sided Wilcoxon test	0.25	5
Cox7c	6.4424e-13	0.517695	0.869	0.783	1.51293e-08	Two-sided Wilcoxon test	0.25	5
Rpl36	7.12577e-13	0.548564	0.782	0.718	1.67342e-08	Two-sided Wilcoxon test	0.25	5
Rpl36a	8.70683e-13	0.460941	0.852	0.812	2.04471e-08	Two-sided Wilcoxon test	0.25	5
Ndufc1	9.11062e-13	0.525032	0.716	0.572	2.13954e-08	Two-sided Wilcoxon test	0.25	5
Uqcr11	9.59424e-13	0.531486	0.651	0.472	2.25311e-08	Two-sided Wilcoxon test	0.25	5
Atp5l	1.14427e-12	0.610711	0.804	0.762	2.6872e-08	Two-sided Wilcoxon test	0.25	5
Rpl37	1.26385e-12	0.449753	0.919	0.894	2.96802e-08	Two-sided Wilcoxon test	0.25	5
Rps18	1.26944e-12	0.551056	0.914	0.903	2.98116e-08	Two-sided Wilcoxon test	0.25	5
Rpl36al	1.29986e-12	0.457475	0.773	0.71	3.05259e-08	Two-sided Wilcoxon test	0.25	5
Hbb-bs	1.97454e-12	0.403544	0.252	0.065	4.63701e-08	Two-sided Wilcoxon test	0.25	5
Lrrc4	2.34341e-12	-0.552094	0.497	0.677	5.50327e-08	Two-sided Wilcoxon test	0.25	5
Rpl23a	4.38895e-12	0.456036	0.904	0.856	1.0307e-07	Two-sided Wilcoxon test	0.25	5
Ubl5	5.89092e-12	0.424136	0.593	0.422	1.38342e-07	Two-sided Wilcoxon test	0.25	5
Rpl17	6.65345e-12	0.486948	0.953	0.924	1.5625e-07	Two-sided Wilcoxon test	0.25	5
Uqcr10	6.98619e-12	0.644093	0.695	0.581	1.64064e-07	Two-sided Wilcoxon test	0.25	5
Rbx1	1.11613e-11	0.448986	0.787	0.68	2.62112e-07	Two-sided Wilcoxon test	0.25	5
Romo1	1.18424e-11	0.462925	0.609	0.44	2.78107e-07	Two-sided Wilcoxon test	0.25	5
Phykpl	1.53062e-11	-0.398314	0.276	0.472	3.59451e-07	Two-sided Wilcoxon test	0.25	5
Mt1	1.91629e-11	0.613927	0.635	0.425	4.50022e-07	Two-sided Wilcoxon test	0.25	5
Cmss1	2.05922e-11	-0.308574	0.981	0.985	4.83588e-07	Two-sided Wilcoxon test	0.25	5
Gm15283	2.07636e-11	-0.415667	0.381	0.592	4.87611e-07	Two-sided Wilcoxon test	0.25	5
Gm13938	2.09523e-11	-0.338251	0.166	0.355	4.92044e-07	Two-sided Wilcoxon test	0.25	5
Hypk	2.47509e-11	0.352407	0.532	0.326	5.81251e-07	Two-sided Wilcoxon test	0.25	5
Crip1	2.75977e-11	0.508118	0.568	0.375	6.48104e-07	Two-sided Wilcoxon test	0.25	5
Gm35188	4.53778e-11	-0.491485	0.347	0.54	1.06565e-06	Two-sided Wilcoxon test	0.25	5
Rpl10a	5.66216e-11	0.450632	0.953	0.938	1.3297e-06	Two-sided Wilcoxon test	0.25	5
Cox7b	6.29053e-11	0.524084	0.839	0.798	1.47727e-06	Two-sided Wilcoxon test	0.25	5
Rps7	6.58735e-11	0.416933	0.976	0.971	1.54697e-06	Two-sided Wilcoxon test	0.25	5
Tmem256	6.64573e-11	0.346257	0.461	0.267	1.56068e-06	Two-sided Wilcoxon test	0.25	5
Uqcc2	8.05967e-11	0.401876	0.541	0.361	1.89273e-06	Two-sided Wilcoxon test	0.25	5
Ndufa11	8.12125e-11	0.463048	0.625	0.455	1.90719e-06	Two-sided Wilcoxon test	0.25	5
Nebl	8.16114e-11	-0.373242	0.932	0.962	1.91656e-06	Two-sided Wilcoxon test	0.25	5
Rpl13a	9.53509e-11	0.380503	0.961	0.935	2.23922e-06	Two-sided Wilcoxon test	0.25	5
Rpl11	9.53668e-11	0.37043	0.968	0.974	2.2396e-06	Two-sided Wilcoxon test	0.25	5
Ndufa7	9.66907e-11	0.490668	0.62	0.478	2.27068e-06	Two-sided Wilcoxon test	0.25	5
Gm2000	1.05393e-10	0.199729	0.26	0.085	2.47504e-06	Two-sided Wilcoxon test	0.25	5
Elob	1.16122e-10	0.480528	0.766	0.721	2.72701e-06	Two-sided Wilcoxon test	0.25	5
Rpl18a	1.38259e-10	0.395733	0.977	0.968	3.24688e-06	Two-sided Wilcoxon test	0.25	5
mt-Nd3	1.39836e-10	0.608972	0.982	0.968	3.28392e-06	Two-sided Wilcoxon test	0.25	5
Ndufa5	1.69383e-10	0.433112	0.721	0.595	3.9778e-06	Two-sided Wilcoxon test	0.25	5
Ndufs6	1.74667e-10	0.450107	0.687	0.545	4.10189e-06	Two-sided Wilcoxon test	0.25	5
Ndufb7	1.96707e-10	0.397031	0.737	0.598	4.61947e-06	Two-sided Wilcoxon test	0.25	5
Lysmd4	2.05906e-10	-0.364437	0.315	0.507	4.83549e-06	Two-sided Wilcoxon test	0.25	5
Gm19710	2.21267e-10	-0.366915	0.159	0.328	5.19623e-06	Two-sided Wilcoxon test	0.25	5
Gm13269	2.61861e-10	-0.442717	0.411	0.61	6.14954e-06	Two-sided Wilcoxon test	0.25	5
Uqcrh	3.3372e-10	0.458518	0.864	0.85	7.83707e-06	Two-sided Wilcoxon test	0.25	5
Rpl35	3.34024e-10	0.443223	0.869	0.821	7.84421e-06	Two-sided Wilcoxon test	0.25	5
Lsm6	3.38999e-10	0.326644	0.638	0.487	7.96104e-06	Two-sided Wilcoxon test	0.25	5
Kdm5d	3.58697e-10	-0.287868	0.13	0.29	8.42364e-06	Two-sided Wilcoxon test	0.25	5
Cox5a	4.85171e-10	0.448328	0.888	0.836	1.13937e-05	Two-sided Wilcoxon test	0.25	5
Uqcrq	4.9911e-10	0.538853	0.633	0.51	1.17211e-05	Two-sided Wilcoxon test	0.25	5
Gm47271	5.59695e-10	-0.464026	0.422	0.589	1.31439e-05	Two-sided Wilcoxon test	0.25	5
Atp5j	6.17844e-10	0.403725	0.82	0.757	1.45094e-05	Two-sided Wilcoxon test	0.25	5
Uqcrb	8.24152e-10	0.390722	0.808	0.713	1.93544e-05	Two-sided Wilcoxon test	0.25	5
Rpl14	8.86302e-10	0.376964	0.958	0.95	2.08139e-05	Two-sided Wilcoxon test	0.25	5
Lrrtm3	9.46731e-10	-0.564206	0.604	0.727	2.2233e-05	Two-sided Wilcoxon test	0.25	5
Tubb5	1.09334e-09	0.432717	0.945	0.9	2.56759e-05	Two-sided Wilcoxon test	0.25	5
Gm49959	1.48625e-09	-0.321271	0.284	0.475	3.49032e-05	Two-sided Wilcoxon test	0.25	5
Mif	1.59877e-09	0.400704	0.943	0.921	3.75456e-05	Two-sided Wilcoxon test	0.25	5
Rps5	1.88866e-09	0.374611	0.972	0.959	4.43533e-05	Two-sided Wilcoxon test	0.25	5
Qk	1.97539e-09	-0.369745	0.984	0.977	4.639e-05	Two-sided Wilcoxon test	0.25	5
Ndufb4	2.00133e-09	0.390808	0.563	0.402	4.69992e-05	Two-sided Wilcoxon test	0.25	5
Myl6	2.36179e-09	0.413596	0.912	0.9	5.54644e-05	Two-sided Wilcoxon test	0.25	5
mt-Nd4l	2.90374e-09	0.546626	0.966	0.918	6.81914e-05	Two-sided Wilcoxon test	0.25	5
Atp5g1	2.9303e-09	0.460741	0.817	0.748	6.88151e-05	Two-sided Wilcoxon test	0.25	5
Hint1	3.0744e-09	0.451817	0.787	0.724	7.21992e-05	Two-sided Wilcoxon test	0.25	5
Utrn	3.14328e-09	-0.394692	0.826	0.915	7.38168e-05	Two-sided Wilcoxon test	0.25	5
Rpl7	3.42533e-09	0.364541	0.953	0.947	8.04405e-05	Two-sided Wilcoxon test	0.25	5
Mrps21	3.49629e-09	0.36819	0.568	0.413	8.21069e-05	Two-sided Wilcoxon test	0.25	5
Cdh2	3.98759e-09	-0.397649	0.958	0.968	9.36446e-05	Two-sided Wilcoxon test	0.25	5
Pard3bos1	4.86865e-09	-0.411201	0.149	0.299	0.000114335	Two-sided Wilcoxon test	0.25	5
Gm10848	5.19718e-09	-0.523036	0.429	0.604	0.00012205	Two-sided Wilcoxon test	0.25	5
Rps2	5.5712e-09	0.434118	0.979	0.971	0.000130834	Two-sided Wilcoxon test	0.25	5
Sptbn1	6.69776e-09	-0.330906	0.963	0.971	0.00015729	Two-sided Wilcoxon test	0.25	5
Gm1673	7.12847e-09	0.215525	0.364	0.191	0.000167405	Two-sided Wilcoxon test	0.25	5
Rpl8	7.2222e-09	0.376077	0.956	0.95	0.000169606	Two-sided Wilcoxon test	0.25	5
Mrps18c	7.49765e-09	0.295856	0.487	0.314	0.000176075	Two-sided Wilcoxon test	0.25	5
Phpt1	8.15136e-09	0.280738	0.464	0.287	0.000191426	Two-sided Wilcoxon test	0.25	5
Dbi	1.06877e-08	0.386705	0.768	0.666	0.000250991	Two-sided Wilcoxon test	0.25	5
Macf1	1.13061e-08	-0.297002	0.966	0.985	0.000265514	Two-sided Wilcoxon test	0.25	5
Eef1a1	1.20377e-08	0.417214	0.997	0.994	0.000282692	Two-sided Wilcoxon test	0.25	5
Rpl12	1.31403e-08	0.330729	0.979	0.962	0.000308586	Two-sided Wilcoxon test	0.25	5
Micos13	1.39996e-08	0.372496	0.589	0.437	0.000328766	Two-sided Wilcoxon test	0.25	5
Snrpf	1.62787e-08	0.322302	0.633	0.49	0.000382289	Two-sided Wilcoxon test	0.25	5
Pfdn5	1.65988e-08	0.404702	0.692	0.604	0.000389807	Two-sided Wilcoxon test	0.25	5
Ndufb2	1.72111e-08	0.385444	0.586	0.457	0.000404185	Two-sided Wilcoxon test	0.25	5
Cacnb2	1.87385e-08	-0.418786	0.982	0.982	0.000440054	Two-sided Wilcoxon test	0.25	5
Rps28	1.9548e-08	0.421384	0.82	0.798	0.000459066	Two-sided Wilcoxon test	0.25	5
Hbb-bh1	2.06389e-08	0.784789	0.982	0.924	0.000484684	Two-sided Wilcoxon test	0.25	5
Atox1	2.66956e-08	0.356624	0.503	0.352	0.00062692	Two-sided Wilcoxon test	0.25	5
Bola2	2.67474e-08	0.252422	0.347	0.185	0.000628135	Two-sided Wilcoxon test	0.25	5
Micos10	2.76876e-08	0.385714	0.771	0.718	0.000650216	Two-sided Wilcoxon test	0.25	5
Mrpl52	2.80185e-08	0.331408	0.531	0.37	0.000657986	Two-sided Wilcoxon test	0.25	5
Taldo1	2.93926e-08	0.338613	0.609	0.481	0.000690255	Two-sided Wilcoxon test	0.25	5
Sem1	3.29595e-08	0.401015	0.698	0.657	0.000774021	Two-sided Wilcoxon test	0.25	5
Mrps16	3.88031e-08	0.339991	0.5	0.343	0.000911251	Two-sided Wilcoxon test	0.25	5
Dynll1	4.28295e-08	0.388998	0.877	0.848	0.00100581	Two-sided Wilcoxon test	0.25	5
Esrrg	4.95087e-08	-0.435856	0.893	0.927	0.00116266	Two-sided Wilcoxon test	0.25	5
Slc8a1	5.56372e-08	-0.367513	1	1	0.00130658	Two-sided Wilcoxon test	0.25	5
Mef2a	5.74018e-08	-0.354346	0.8	0.903	0.00134802	Two-sided Wilcoxon test	0.25	5
Psmb3	5.81972e-08	0.386312	0.687	0.584	0.0013667	Two-sided Wilcoxon test	0.25	5
Ndufa1	6.13955e-08	0.332158	0.432	0.284	0.00144181	Two-sided Wilcoxon test	0.25	5
Timm13	6.46479e-08	0.2852	0.562	0.396	0.00151819	Two-sided Wilcoxon test	0.25	5
Gm15614	7.39823e-08	-0.286346	0.253	0.408	0.0017374	Two-sided Wilcoxon test	0.25	5
Atp5h	7.50719e-08	0.359888	0.854	0.801	0.00176299	Two-sided Wilcoxon test	0.25	5
Gm36975	7.53067e-08	-0.464162	0.334	0.484	0.0017685	Two-sided Wilcoxon test	0.25	5
Naa38	8.26255e-08	0.212047	0.359	0.208	0.00194038	Two-sided Wilcoxon test	0.25	5
Bola1	9.17546e-08	0.17573	0.299	0.144	0.00215477	Two-sided Wilcoxon test	0.25	5
Lims1	9.27945e-08	-0.373363	0.688	0.806	0.00217919	Two-sided Wilcoxon test	0.25	5
Mycbp2	9.83349e-08	-0.348384	0.748	0.848	0.0023093	Two-sided Wilcoxon test	0.25	5
Cox5b	1.01538e-07	0.397469	0.742	0.663	0.00238452	Two-sided Wilcoxon test	0.25	5
Pcbp1	1.19313e-07	0.307481	0.703	0.592	0.00280195	Two-sided Wilcoxon test	0.25	5
Magi3	1.29286e-07	-0.406392	0.859	0.906	0.00303615	Two-sided Wilcoxon test	0.25	5
Krtcap2	1.65252e-07	0.35099	0.593	0.475	0.00388078	Two-sided Wilcoxon test	0.25	5
Gm20404	1.84021e-07	-0.136053	0.037	0.126	0.00432155	Two-sided Wilcoxon test	0.25	5
Pcdh7	2.13822e-07	-0.461468	0.927	0.935	0.00502139	Two-sided Wilcoxon test	0.25	5
Gm44686	2.15241e-07	-0.336116	0.136	0.264	0.00505472	Two-sided Wilcoxon test	0.25	5
Hsbp1	2.29427e-07	0.318881	0.554	0.416	0.00538787	Two-sided Wilcoxon test	0.25	5
Kcnq1ot1	2.29885e-07	-0.421642	0.896	0.924	0.00539862	Two-sided Wilcoxon test	0.25	5
Anapc11	2.46459e-07	0.278827	0.487	0.317	0.00578783	Two-sided Wilcoxon test	0.25	5
Gm37240	2.47183e-07	-0.446489	0.453	0.598	0.00580485	Two-sided Wilcoxon test	0.25	5
mt-Nd6	2.48742e-07	-0.550964	0.88	0.889	0.00584145	Two-sided Wilcoxon test	0.25	5
Rpl19	2.69778e-07	0.331507	0.942	0.93	0.00633547	Two-sided Wilcoxon test	0.25	5
Acta2	3.00862e-07	0.447932	0.901	0.862	0.00706544	Two-sided Wilcoxon test	0.25	5
Kcnj13	3.0624e-07	-0.145723	0.031	0.111	0.00719173	Two-sided Wilcoxon test	0.25	5
Tagln	3.27813e-07	0.591057	0.732	0.625	0.00769837	Two-sided Wilcoxon test	0.25	5
Smg1	3.34771e-07	-0.35874	0.698	0.771	0.00786177	Two-sided Wilcoxon test	0.25	5
Rpl24	3.60613e-07	0.308018	0.93	0.909	0.00846863	Two-sided Wilcoxon test	0.25	5
Ndufs5	3.74287e-07	0.340428	0.661	0.54	0.00878977	Two-sided Wilcoxon test	0.25	5
Actb	4.0566e-07	0.49541	0.961	0.956	0.00952652	Two-sided Wilcoxon test	0.25	5
Myl7	4.09707e-07	0.436265	0.935	0.933	0.00962157	Two-sided Wilcoxon test	0.25	5
Naxe	4.13759e-07	0.200296	0.356	0.202	0.00971672	Two-sided Wilcoxon test	0.25	5
Map4	4.21618e-07	-0.337281	0.718	0.804	0.00990127	Two-sided Wilcoxon test	0.25	5
Mrpl20	4.24309e-07	0.253488	0.55	0.396	0.00996446	Two-sided Wilcoxon test	0.25	5
Selenow	4.56092e-07	0.350909	0.677	0.592	0.0107109	Two-sided Wilcoxon test	0.25	5
1500011B03Rik	4.65183e-07	0.163838	0.304	0.158	0.0109244	Two-sided Wilcoxon test	0.25	5
Gm16599	4.78188e-07	-0.343485	0.44	0.578	0.0112298	Two-sided Wilcoxon test	0.25	5
Rfx7	4.79153e-07	-0.384363	0.607	0.733	0.0112524	Two-sided Wilcoxon test	0.25	5
Mrpl53	4.95136e-07	0.283017	0.584	0.419	0.0116278	Two-sided Wilcoxon test	0.25	5
Strbp	5.50594e-07	-0.332611	0.795	0.862	0.0129301	Two-sided Wilcoxon test	0.25	5
1110038B12Rik	5.61087e-07	0.208127	0.302	0.158	0.0131766	Two-sided Wilcoxon test	0.25	5
Zfp407	5.66475e-07	-0.423065	0.716	0.806	0.0133031	Two-sided Wilcoxon test	0.25	5
Rpl29	5.74069e-07	0.321375	0.901	0.862	0.0134814	Two-sided Wilcoxon test	0.25	5
Rabgef1	5.94816e-07	0.172989	0.45	0.287	0.0139686	Two-sided Wilcoxon test	0.25	5
Ctnna3	6.61328e-07	-0.422621	0.971	0.977	0.0155306	Two-sided Wilcoxon test	0.25	5
Arhgap31	6.66951e-07	-0.386516	0.826	0.894	0.0156627	Two-sided Wilcoxon test	0.25	5
Hpgds	6.91558e-07	-0.152322	0.052	0.147	0.0162406	Two-sided Wilcoxon test	0.25	5
Nme2	7.00016e-07	0.35765	0.857	0.862	0.0164392	Two-sided Wilcoxon test	0.25	5
Gm17106	7.21098e-07	-0.261277	0.2	0.331	0.0169343	Two-sided Wilcoxon test	0.25	5
Pard3	8.28484e-07	-0.31312	0.898	0.947	0.0194561	Two-sided Wilcoxon test	0.25	5
Gm11149	8.53921e-07	-0.237655	0.065	0.161	0.0200535	Two-sided Wilcoxon test	0.25	5
Tbca	8.80575e-07	0.297847	0.771	0.68	0.0206794	Two-sided Wilcoxon test	0.25	5
Rpl22l1	9.22115e-07	0.316849	0.631	0.543	0.021655	Two-sided Wilcoxon test	0.25	5
Ftl1	9.64842e-07	0.293799	0.961	0.947	0.0226584	Two-sided Wilcoxon test	0.25	5
Dst	1.03343e-06	-0.373863	0.838	0.889	0.024269	Two-sided Wilcoxon test	0.25	5
Polr2i	1.05096e-06	0.183234	0.377	0.22	0.0246807	Two-sided Wilcoxon test	0.25	5
Anapc13	1.05681e-06	0.251202	0.455	0.299	0.0248181	Two-sided Wilcoxon test	0.25	5
Atp9b	1.09595e-06	-0.358299	0.628	0.736	0.0257372	Two-sided Wilcoxon test	0.25	5
Atp5k	1.29315e-06	0.32728	0.744	0.674	0.0303682	Two-sided Wilcoxon test	0.25	5
Rplp0	1.31954e-06	0.332169	0.955	0.935	0.030988	Two-sided Wilcoxon test	0.25	5
Rock1	1.33754e-06	-0.289159	0.802	0.877	0.0314108	Two-sided Wilcoxon test	0.25	5
Gm26827	1.34246e-06	-0.194166	0.049	0.135	0.0315263	Two-sided Wilcoxon test	0.25	5
Gm15563	1.37546e-06	-0.202064	0.146	0.27	0.0323013	Two-sided Wilcoxon test	0.25	5
Mrpl23	1.38327e-06	0.253263	0.497	0.349	0.0324846	Two-sided Wilcoxon test	0.25	5
Luc7l2	1.40094e-06	-0.282905	0.881	0.927	0.0328996	Two-sided Wilcoxon test	0.25	5
H2afj	1.43129e-06	0.19864	0.349	0.202	0.0336125	Two-sided Wilcoxon test	0.25	5
Ubn2	1.50156e-06	-0.259794	0.636	0.757	0.0352625	Two-sided Wilcoxon test	0.25	5
Mrpl54	1.536e-06	0.310339	0.529	0.405	0.0360714	Two-sided Wilcoxon test	0.25	5
Gm17036	1.5968e-06	-0.165771	0.081	0.185	0.0374994	Two-sided Wilcoxon test	0.25	5
Rasal2	1.71753e-06	-0.377893	0.737	0.824	0.0403344	Two-sided Wilcoxon test	0.25	5
Azin1	1.78186e-06	-0.272874	0.63	0.716	0.0418452	Two-sided Wilcoxon test	0.25	5
Gm19951	1.78996e-06	-0.167722	0.089	0.194	0.0420354	Two-sided Wilcoxon test	0.25	5
Snrpd1	1.80317e-06	0.314317	0.768	0.736	0.0423457	Two-sided Wilcoxon test	0.25	5
Trip12	1.92079e-06	-0.33272	0.807	0.862	0.0451078	Two-sided Wilcoxon test	0.25	5
Airn	1.93465e-06	-0.277653	0.994	0.991	0.0454334	Two-sided Wilcoxon test	0.25	5
Ndufa6	1.99102e-06	0.357137	0.623	0.545	0.0467571	Two-sided Wilcoxon test	0.25	5
1700085D07Rik	2.04485e-06	-0.125334	0.042	0.126	0.0480213	Two-sided Wilcoxon test	0.25	5
Senp6	2.1199e-06	-0.291625	0.766	0.856	0.0497836	Two-sided Wilcoxon test	0.25	5
Uba52	2.39894e-06	0.294191	0.599	0.481	0.0563367	Two-sided Wilcoxon test	0.25	5
Akap9	2.62102e-06	-0.338189	0.761	0.836	0.0615521	Two-sided Wilcoxon test	0.25	5
4921511I17Rik	2.82287e-06	-0.203136	0.05	0.135	0.0662923	Two-sided Wilcoxon test	0.25	5
Gm26749	3.1678e-06	-0.211752	0.164	0.293	0.0743925	Two-sided Wilcoxon test	0.25	5
Hmbox1	3.24087e-06	-0.302293	0.532	0.654	0.0761086	Two-sided Wilcoxon test	0.25	5
B430010I23Rik	3.30043e-06	-0.121088	0.037	0.114	0.0775072	Two-sided Wilcoxon test	0.25	5
Tanc2	3.37576e-06	-0.386442	0.856	0.909	0.0792763	Two-sided Wilcoxon test	0.25	5
Rpl13	3.54868e-06	0.263804	0.995	0.991	0.0833372	Two-sided Wilcoxon test	0.25	5
Prpf4b	3.56875e-06	-0.303365	0.672	0.739	0.0838086	Two-sided Wilcoxon test	0.25	5
Gm47167	3.59143e-06	-0.217759	0.146	0.264	0.0843411	Two-sided Wilcoxon test	0.25	5
Fxyd1	3.79924e-06	0.323583	0.581	0.443	0.0892215	Two-sided Wilcoxon test	0.25	5
Ktn1	3.96131e-06	-0.21299	0.86	0.9	0.0930275	Two-sided Wilcoxon test	0.25	5
Marcksl1	4.06127e-06	0.371143	0.515	0.405	0.0953749	Two-sided Wilcoxon test	0.25	5
Hist1h4d	4.32087e-06	0.208712	0.321	0.182	0.101471	Two-sided Wilcoxon test	0.25	5
Camk2d	4.76156e-06	-0.338204	0.904	0.962	0.11182	Two-sided Wilcoxon test	0.25	5
Scand1	4.84094e-06	0.228508	0.448	0.314	0.113685	Two-sided Wilcoxon test	0.25	5
Unc5b	5.14135e-06	-0.330842	0.404	0.516	0.120739	Two-sided Wilcoxon test	0.25	5
Ncoa1	5.18151e-06	-0.367221	0.675	0.745	0.121682	Two-sided Wilcoxon test	0.25	5
Cacna1c	5.18363e-06	-0.344383	0.979	0.991	0.121732	Two-sided Wilcoxon test	0.25	5
Hcfc1r1	5.27625e-06	0.283744	0.698	0.563	0.123908	Two-sided Wilcoxon test	0.25	5
Rnf150	5.37768e-06	0.183831	0.213	0.097	0.126289	Two-sided Wilcoxon test	0.25	5
Birc6	5.47169e-06	-0.279489	0.831	0.871	0.128497	Two-sided Wilcoxon test	0.25	5
Svep1	5.67656e-06	0.147417	0.166	0.062	0.133308	Two-sided Wilcoxon test	0.25	5
Sf3b4	5.73286e-06	0.164704	0.32	0.191	0.134631	Two-sided Wilcoxon test	0.25	5
Cox6a2	6.0376e-06	0.414491	0.588	0.466	0.141787	Two-sided Wilcoxon test	0.25	5
Stt3b	6.16635e-06	-0.365483	0.711	0.751	0.144811	Two-sided Wilcoxon test	0.25	5
Csnk1g3	6.21896e-06	-0.282095	0.583	0.698	0.146046	Two-sided Wilcoxon test	0.25	5
Dnajc1	6.60125e-06	-0.349571	0.607	0.698	0.155024	Two-sided Wilcoxon test	0.25	5
Myh10	6.62254e-06	-0.271148	0.851	0.915	0.155524	Two-sided Wilcoxon test	0.25	5
Stk39	6.64614e-06	-0.387425	0.86	0.883	0.156078	Two-sided Wilcoxon test	0.25	5
Ube3a	6.68261e-06	-0.267737	0.771	0.856	0.156934	Two-sided Wilcoxon test	0.25	5
Zbtb20	6.76208e-06	-0.299039	0.886	0.927	0.158801	Two-sided Wilcoxon test	0.25	5
Egr1	6.96167e-06	0.254438	0.404	0.258	0.163488	Two-sided Wilcoxon test	0.25	5
Shcbp1l	7.14768e-06	-0.106082	0.024	0.088	0.167856	Two-sided Wilcoxon test	0.25	5
Mrpl57	7.31087e-06	0.225594	0.417	0.284	0.171688	Two-sided Wilcoxon test	0.25	5
Hipk3	7.49967e-06	-0.299426	0.718	0.774	0.176122	Two-sided Wilcoxon test	0.25	5
2310009B15Rik	7.59231e-06	0.110231	0.247	0.123	0.178298	Two-sided Wilcoxon test	0.25	5
Aspn	7.72249e-06	-0.105901	0.034	0.106	0.181355	Two-sided Wilcoxon test	0.25	5
Pdcd5	7.7278e-06	0.293541	0.713	0.63	0.18148	Two-sided Wilcoxon test	0.25	5
Phf3	7.75031e-06	-0.302879	0.716	0.774	0.182008	Two-sided Wilcoxon test	0.25	5
Lrrfip1	7.99204e-06	-0.249442	0.904	0.935	0.187685	Two-sided Wilcoxon test	0.25	5
Slirp	8.04208e-06	0.280463	0.438	0.323	0.18886	Two-sided Wilcoxon test	0.25	5
Rps4x	8.44389e-06	0.314191	0.956	0.956	0.198296	Two-sided Wilcoxon test	0.25	5
Crabp1	8.70382e-06	0.364029	0.201	0.094	0.204401	Two-sided Wilcoxon test	0.25	5
2410006H16Rik	8.98108e-06	0.186761	0.336	0.202	0.210912	Two-sided Wilcoxon test	0.25	5
Gm5089	9.00926e-06	-0.209143	0.091	0.188	0.211573	Two-sided Wilcoxon test	0.25	5
Rnf19a	9.04078e-06	-0.351702	0.503	0.601	0.212314	Two-sided Wilcoxon test	0.25	5
Gm17231	9.25115e-06	-0.248451	0.099	0.202	0.217254	Two-sided Wilcoxon test	0.25	5
Lsm7	9.45121e-06	0.249968	0.429	0.311	0.221952	Two-sided Wilcoxon test	0.25	5
Chd2	9.51064e-06	-0.302152	0.885	0.924	0.223348	Two-sided Wilcoxon test	0.25	5
Prkca	9.52648e-06	-0.350178	0.753	0.801	0.22372	Two-sided Wilcoxon test	0.25	5
Hist1h2an	9.56838e-06	0.104205	0.144	0.05	0.224704	Two-sided Wilcoxon test	0.25	5
Actc1	9.73311e-06	0.353513	0.992	0.994	0.228572	Two-sided Wilcoxon test	0.25	5
Psmg4	9.94712e-06	0.142798	0.377	0.24	0.233598	Two-sided Wilcoxon test	0.25	5
Nr2f2	1.00951e-05	0.221561	0.278	0.147	0.237073	Two-sided Wilcoxon test	0.25	5
Ank3	1.03215e-05	-0.326884	0.959	0.965	0.242391	Two-sided Wilcoxon test	0.25	5
Rsbn1l	1.09122e-05	-0.245775	0.461	0.566	0.256263	Two-sided Wilcoxon test	0.25	5
Cox17	1.09438e-05	0.235096	0.458	0.328	0.257004	Two-sided Wilcoxon test	0.25	5
Zfpm2	1.11041e-05	-0.345763	0.955	0.968	0.26077	Two-sided Wilcoxon test	0.25	5
Rpp21	1.21264e-05	0.1515	0.346	0.211	0.284777	Two-sided Wilcoxon test	0.25	5
Cops9	1.21455e-05	0.248087	0.511	0.39	0.285226	Two-sided Wilcoxon test	0.25	5
Hist1h3c	1.21632e-05	0.170452	0.256	0.132	0.28564	Two-sided Wilcoxon test	0.25	5
Tuba1b	1.31579e-05	0.297513	0.641	0.543	0.309001	Two-sided Wilcoxon test	0.25	5
Rsf1os1	1.34883e-05	-0.30442	0.151	0.258	0.31676	Two-sided Wilcoxon test	0.25	5
Sub1	1.35313e-05	0.252102	0.856	0.812	0.317768	Two-sided Wilcoxon test	0.25	5
Gm12353	1.4148e-05	-0.205373	0.159	0.279	0.332251	Two-sided Wilcoxon test	0.25	5
Fbxl17	1.60783e-05	-0.344113	0.701	0.801	0.377582	Two-sided Wilcoxon test	0.25	5
Ndufa3	1.64074e-05	0.167801	0.461	0.308	0.385312	Two-sided Wilcoxon test	0.25	5
Thyn1	1.68099e-05	0.168069	0.412	0.27	0.394763	Two-sided Wilcoxon test	0.25	5
Pqbp1	1.71606e-05	0.121684	0.271	0.15	0.402999	Two-sided Wilcoxon test	0.25	5
Cwc27	1.72891e-05	-0.288231	0.547	0.648	0.406018	Two-sided Wilcoxon test	0.25	5
Ppp1ca	1.82359e-05	0.273236	0.667	0.587	0.428253	Two-sided Wilcoxon test	0.25	5
Gapdh	1.83249e-05	0.277775	0.974	0.959	0.430343	Two-sided Wilcoxon test	0.25	5
Fgfr2	1.902e-05	-0.323341	0.643	0.742	0.446665	Two-sided Wilcoxon test	0.25	5
Gm20275	1.91442e-05	-0.283108	0.295	0.419	0.449583	Two-sided Wilcoxon test	0.25	5
Pin4	1.91671e-05	0.15	0.313	0.185	0.45012	Two-sided Wilcoxon test	0.25	5
Tmsb10	1.97802e-05	0.352059	0.867	0.88	0.464519	Two-sided Wilcoxon test	0.25	5
Nedd8	2.00238e-05	0.252571	0.732	0.669	0.470239	Two-sided Wilcoxon test	0.25	5
Bola3	2.00972e-05	0.223721	0.513	0.372	0.471963	Two-sided Wilcoxon test	0.25	5
Ndufb6	2.08537e-05	0.251634	0.558	0.425	0.489729	Two-sided Wilcoxon test	0.25	5
D830005E20Rik	2.14207e-05	-0.124651	0.049	0.123	0.503044	Two-sided Wilcoxon test	0.25	5
Fkbp1a	2.17349e-05	0.264407	0.769	0.718	0.510422	Two-sided Wilcoxon test	0.25	5
Atg16l2	2.1766e-05	-0.242478	0.148	0.249	0.511153	Two-sided Wilcoxon test	0.25	5
Baz2b	2.18164e-05	-0.274089	0.839	0.915	0.512337	Two-sided Wilcoxon test	0.25	5
Atp5md	2.22825e-05	0.308242	0.714	0.622	0.523283	Two-sided Wilcoxon test	0.25	5
Ndufv3	2.25307e-05	0.28039	0.557	0.443	0.52911	Two-sided Wilcoxon test	0.25	5
Zfp644	2.25376e-05	-0.31989	0.789	0.859	0.529273	Two-sided Wilcoxon test	0.25	5
Ddr2	2.25687e-05	0.0809324	0.143	0.05	0.530003	Two-sided Wilcoxon test	0.25	5
Fhod3	2.35035e-05	-0.333309	0.888	0.915	0.551955	Two-sided Wilcoxon test	0.25	5
Lgals1	2.49125e-05	0.344949	0.571	0.431	0.585044	Two-sided Wilcoxon test	0.25	5
Bsg	2.57669e-05	0.223363	0.828	0.78	0.605109	Two-sided Wilcoxon test	0.25	5
Gm20631	2.70393e-05	-0.40055	0.211	0.311	0.634991	Two-sided Wilcoxon test	0.25	5
Gm10135	2.70995e-05	-0.167524	0.06	0.141	0.636404	Two-sided Wilcoxon test	0.25	5
Ttc19	2.72965e-05	-0.269958	0.472	0.572	0.641031	Two-sided Wilcoxon test	0.25	5
Arfgef1	2.77296e-05	-0.252564	0.692	0.765	0.651202	Two-sided Wilcoxon test	0.25	5
Ube3c	2.82869e-05	-0.384233	0.586	0.654	0.66429	Two-sided Wilcoxon test	0.25	5
Tpt1	2.83577e-05	0.282469	0.998	1	0.665952	Two-sided Wilcoxon test	0.25	5
Rpl15	2.92618e-05	0.287384	0.966	0.971	0.687184	Two-sided Wilcoxon test	0.25	5
Phtf2	3.08307e-05	-0.267463	0.664	0.724	0.724029	Two-sided Wilcoxon test	0.25	5
Ptbp2	3.08748e-05	-0.332721	0.782	0.853	0.725065	Two-sided Wilcoxon test	0.25	5
P2ry12	3.16416e-05	-0.107602	0.078	0.167	0.743071	Two-sided Wilcoxon test	0.25	5
Cycs	3.19346e-05	0.296915	0.731	0.642	0.749951	Two-sided Wilcoxon test	0.25	5
P2ry14	3.27727e-05	-0.222579	0.231	0.346	0.769635	Two-sided Wilcoxon test	0.25	5
Trpm7	3.29303e-05	-0.230731	0.75	0.801	0.773336	Two-sided Wilcoxon test	0.25	5
Ptprk	3.32646e-05	-0.376794	0.834	0.894	0.781185	Two-sided Wilcoxon test	0.25	5
Pdcd6ip	3.3672e-05	-0.268323	0.472	0.592	0.790753	Two-sided Wilcoxon test	0.25	5
Svbp	3.48368e-05	0.196922	0.49	0.355	0.818106	Two-sided Wilcoxon test	0.25	5
Gm15261	3.48948e-05	-0.359774	0.354	0.469	0.819469	Two-sided Wilcoxon test	0.25	5
Rai14	3.51653e-05	0.185162	0.232	0.123	0.825823	Two-sided Wilcoxon test	0.25	5
Utp14a	3.6548e-05	0.181751	0.305	0.182	0.858293	Two-sided Wilcoxon test	0.25	5
Nhp2	3.65763e-05	0.187951	0.403	0.264	0.858958	Two-sided Wilcoxon test	0.25	5
Wac	3.66011e-05	-0.291751	0.737	0.812	0.85954	Two-sided Wilcoxon test	0.25	5
Ndufb10	3.71524e-05	0.292091	0.61	0.507	0.872486	Two-sided Wilcoxon test	0.25	5
Akt3	3.85012e-05	-0.343913	0.766	0.839	0.904162	Two-sided Wilcoxon test	0.25	5
Myl12a	3.86451e-05	0.306673	0.719	0.669	0.907541	Two-sided Wilcoxon test	0.25	5
Hoxb3	3.89347e-05	0.0627023	0.099	0.026	0.914342	Two-sided Wilcoxon test	0.25	5
Ndufb8	4.04867e-05	0.326271	0.769	0.727	0.950789	Two-sided Wilcoxon test	0.25	5
Ttn	4.15213e-05	-0.333416	0.992	0.997	0.975087	Two-sided Wilcoxon test	0.25	5
Coa3	4.16211e-05	0.211133	0.541	0.416	0.97743	Two-sided Wilcoxon test	0.25	5
Tbx20	4.23691e-05	-0.341352	0.782	0.83	0.994996	Two-sided Wilcoxon test	0.25	5
Cobll1	4.30786e-05	-0.360341	0.406	0.49	1	Two-sided Wilcoxon test	0.25	5
Mllt10	4.35071e-05	-0.284314	0.808	0.842	1	Two-sided Wilcoxon test	0.25	5
Igf2r	4.36487e-05	-0.181365	0.979	0.979	1	Two-sided Wilcoxon test	0.25	5
Hnrnpab	4.37282e-05	0.282028	0.76	0.701	1	Two-sided Wilcoxon test	0.25	5
Grb10	4.58311e-05	-0.247339	0.968	0.985	1	Two-sided Wilcoxon test	0.25	5
Mkln1	4.63225e-05	-0.284296	0.714	0.777	1	Two-sided Wilcoxon test	0.25	5
Wnk1	4.7707e-05	-0.258728	0.838	0.897	1	Two-sided Wilcoxon test	0.25	5
2310039H08Rik	4.77202e-05	0.126463	0.271	0.158	1	Two-sided Wilcoxon test	0.25	5
Gm45716	5.10454e-05	0.228688	0.476	0.34	1	Two-sided Wilcoxon test	0.25	5
Afdn	5.14614e-05	-0.246911	0.87	0.918	1	Two-sided Wilcoxon test	0.25	5
Lamtor2	5.15913e-05	0.260479	0.505	0.405	1	Two-sided Wilcoxon test	0.25	5
Ndufaf8	5.51655e-05	0.15516	0.343	0.22	1	Two-sided Wilcoxon test	0.25	5
Faf1	5.52886e-05	-0.314293	0.745	0.824	1	Two-sided Wilcoxon test	0.25	5
Dmxl1	5.58868e-05	-0.300351	0.701	0.771	1	Two-sided Wilcoxon test	0.25	5
Smg6	5.67769e-05	-0.264026	0.692	0.78	1	Two-sided Wilcoxon test	0.25	5
Gas5	5.70658e-05	0.282032	0.75	0.718	1	Two-sided Wilcoxon test	0.25	5
Ctdnep1	5.7617e-05	0.0885893	0.282	0.164	1	Two-sided Wilcoxon test	0.25	5
Epha7	5.76652e-05	-0.322755	0.648	0.748	1	Two-sided Wilcoxon test	0.25	5
Set	5.80424e-05	0.272146	0.834	0.792	1	Two-sided Wilcoxon test	0.25	5
4930512B01Rik	6.00417e-05	-0.182926	0.071	0.15	1	Two-sided Wilcoxon test	0.25	5
Chchd3	6.0381e-05	-0.296146	0.846	0.889	1	Two-sided Wilcoxon test	0.25	5
Ankrd17	6.06678e-05	-0.231666	0.875	0.912	1	Two-sided Wilcoxon test	0.25	5
Fry	6.07787e-05	-0.524911	0.597	0.683	1	Two-sided Wilcoxon test	0.25	5
Rce1	6.109e-05	0.107129	0.245	0.132	1	Two-sided Wilcoxon test	0.25	5
Wdfy3	6.15761e-05	-0.307581	0.714	0.771	1	Two-sided Wilcoxon test	0.25	5
Ppp6r3	6.16336e-05	-0.255817	0.662	0.754	1	Two-sided Wilcoxon test	0.25	5
Btf3	6.28166e-05	0.298859	0.831	0.83	1	Two-sided Wilcoxon test	0.25	5
Cdk2ap1	6.33938e-05	0.13946	0.326	0.205	1	Two-sided Wilcoxon test	0.25	5
Siva1	6.34874e-05	0.19871	0.519	0.396	1	Two-sided Wilcoxon test	0.25	5
Mtmr3	6.58379e-05	-0.215335	0.635	0.71	1	Two-sided Wilcoxon test	0.25	5
Ank2	6.69929e-05	-0.289807	0.597	0.698	1	Two-sided Wilcoxon test	0.25	5
2410002F23Rik	6.8363e-05	0.151297	0.282	0.167	1	Two-sided Wilcoxon test	0.25	5
5430431A17Rik	7.01509e-05	-0.530138	0.828	0.868	1	Two-sided Wilcoxon test	0.25	5
Trdn	7.2264e-05	-0.27052	0.734	0.78	1	Two-sided Wilcoxon test	0.25	5
Ssbp2	7.40896e-05	-0.296483	0.698	0.768	1	Two-sided Wilcoxon test	0.25	5
Dab2ip	7.4206e-05	-0.203292	0.607	0.698	1	Two-sided Wilcoxon test	0.25	5
Nr2f1	7.58506e-05	0.179414	0.175	0.082	1	Two-sided Wilcoxon test	0.25	5
Bud31	7.77951e-05	0.166852	0.372	0.249	1	Two-sided Wilcoxon test	0.25	5
Commd10	7.88183e-05	-0.236698	0.487	0.587	1	Two-sided Wilcoxon test	0.25	5
Pnn	7.99801e-05	-0.23302	0.657	0.736	1	Two-sided Wilcoxon test	0.25	5
Surf4	8.12634e-05	0.20413	0.498	0.396	1	Two-sided Wilcoxon test	0.25	5
Hs3st3a1	8.22197e-05	0.0706732	0.086	0.021	1	Two-sided Wilcoxon test	0.25	5
Rps9	8.24136e-05	0.306995	0.946	0.965	1	Two-sided Wilcoxon test	0.25	5
Epc1	8.28384e-05	-0.223856	0.656	0.736	1	Two-sided Wilcoxon test	0.25	5
Fitm1	8.50216e-05	0.216779	0.369	0.252	1	Two-sided Wilcoxon test	0.25	5
Snx12	8.52983e-05	0.176037	0.401	0.276	1	Two-sided Wilcoxon test	0.25	5
Strn3	8.63677e-05	-0.285158	0.87	0.912	1	Two-sided Wilcoxon test	0.25	5
Pfkl	8.70365e-05	-0.201397	0.653	0.71	1	Two-sided Wilcoxon test	0.25	5
Ephb2	8.75682e-05	0.102135	0.157	0.067	1	Two-sided Wilcoxon test	0.25	5
Pam	8.77655e-05	-0.257294	0.93	0.953	1	Two-sided Wilcoxon test	0.25	5
Pomp	8.96984e-05	0.234536	0.672	0.572	1	Two-sided Wilcoxon test	0.25	5
Gm26936	9.42787e-05	-0.183715	0.08	0.158	1	Two-sided Wilcoxon test	0.25	5
Gm11808	9.49468e-05	0.0882779	0.237	0.132	1	Two-sided Wilcoxon test	0.25	5
Ypel3	9.59673e-05	0.113849	0.281	0.161	1	Two-sided Wilcoxon test	0.25	5
Atp2b1	9.5996e-05	-0.238705	0.791	0.833	1	Two-sided Wilcoxon test	0.25	5
Oaz1	9.61328e-05	0.22414	0.909	0.891	1	Two-sided Wilcoxon test	0.25	5
4930512H18Rik	9.62133e-05	-0.374016	0.578	0.648	1	Two-sided Wilcoxon test	0.25	5
Timm10b	9.7103e-05	0.172453	0.458	0.349	1	Two-sided Wilcoxon test	0.25	5
Ankhd1	9.80192e-05	-0.22278	0.58	0.669	1	Two-sided Wilcoxon test	0.25	5
Fkbp11	0.000100754	0.088299	0.175	0.082	1	Two-sided Wilcoxon test	0.25	5
Rpl38	0.000102023	0.275425	0.836	0.868	1	Two-sided Wilcoxon test	0.25	5
Naca	0.000103169	0.22705	0.929	0.947	1	Two-sided Wilcoxon test	0.25	5
C430049B03Rik	0.000104368	-0.300252	0.537	0.619	1	Two-sided Wilcoxon test	0.25	5
Bax	0.000105086	0.26807	0.593	0.528	1	Two-sided Wilcoxon test	0.25	5
Adamts18	0.000105214	0.118818	0.068	0.012	1	Two-sided Wilcoxon test	0.25	5
Tmem134	0.000105347	0.149601	0.44	0.314	1	Two-sided Wilcoxon test	0.25	5
Map1lc3a	0.000105914	0.286678	0.498	0.384	1	Two-sided Wilcoxon test	0.25	5
Mrpl34	0.000110737	0.222131	0.573	0.463	1	Two-sided Wilcoxon test	0.25	5
Med29	0.000110954	0.150843	0.407	0.279	1	Two-sided Wilcoxon test	0.25	5
Tmem164	0.000111148	-0.244661	0.625	0.742	1	Two-sided Wilcoxon test	0.25	5
Cebpzos	0.000112488	0.0875009	0.268	0.155	1	Two-sided Wilcoxon test	0.25	5
Tnni3k	0.00011293	-0.294393	0.679	0.736	1	Two-sided Wilcoxon test	0.25	5
Kpna4	0.000113707	-0.315541	0.644	0.716	1	Two-sided Wilcoxon test	0.25	5
Gm42439	0.000115527	-0.20494	0.179	0.279	1	Two-sided Wilcoxon test	0.25	5
Serpinh1	0.000115873	0.250403	0.826	0.774	1	Two-sided Wilcoxon test	0.25	5
Col26a1	0.000116408	0.143166	0.138	0.056	1	Two-sided Wilcoxon test	0.25	5
Pbdc1	0.000116686	0.194649	0.494	0.375	1	Two-sided Wilcoxon test	0.25	5
Nexn	0.000117584	-0.201912	0.885	0.915	1	Two-sided Wilcoxon test	0.25	5
St7	0.000119814	-0.226102	0.675	0.762	1	Two-sided Wilcoxon test	0.25	5
Ube2e3	0.000124386	-0.243515	0.617	0.721	1	Two-sided Wilcoxon test	0.25	5
Lemd3	0.000125598	-0.206248	0.339	0.434	1	Two-sided Wilcoxon test	0.25	5
Taf10	0.000126108	0.230796	0.599	0.49	1	Two-sided Wilcoxon test	0.25	5
Pdpr	0.000126496	-0.211557	0.19	0.282	1	Two-sided Wilcoxon test	0.25	5
Ppp1r14c	0.000126718	-0.242541	0.748	0.812	1	Two-sided Wilcoxon test	0.25	5
2410021H03Rik	0.000127442	-0.0712337	0.011	0.053	1	Two-sided Wilcoxon test	0.25	5
Hoxb4	0.000129412	0.072111	0.071	0.015	1	Two-sided Wilcoxon test	0.25	5
Zmat2	0.000132249	0.243367	0.531	0.419	1	Two-sided Wilcoxon test	0.25	5
Ost4	0.000132618	0.188342	0.406	0.284	1	Two-sided Wilcoxon test	0.25	5
Ubr5	0.000132911	-0.259985	0.784	0.85	1	Two-sided Wilcoxon test	0.25	5
Ccng1	0.000132952	0.229729	0.372	0.255	1	Two-sided Wilcoxon test	0.25	5
Lrrfip2	0.000133163	-0.251149	0.679	0.748	1	Two-sided Wilcoxon test	0.25	5
Lsm5	0.000134196	0.209693	0.469	0.37	1	Two-sided Wilcoxon test	0.25	5
Cacna2d1	0.000138825	-0.297856	0.82	0.853	1	Two-sided Wilcoxon test	0.25	5
Agl	0.000141125	-0.201082	0.576	0.663	1	Two-sided Wilcoxon test	0.25	5
Rpl9-ps6	0.000141156	0.0718627	0.159	0.073	1	Two-sided Wilcoxon test	0.25	5
Thbd	0.000142255	0.111813	0.106	0.035	1	Two-sided Wilcoxon test	0.25	5
Lrch3	0.000142659	-0.251628	0.558	0.639	1	Two-sided Wilcoxon test	0.25	5
Ldhb	0.000143006	0.253518	0.713	0.63	1	Two-sided Wilcoxon test	0.25	5
Myh7	0.000143751	-0.359455	0.843	0.88	1	Two-sided Wilcoxon test	0.25	5
Dpm3	0.00014766	0.155975	0.341	0.238	1	Two-sided Wilcoxon test	0.25	5
Glg1	0.000149154	-0.255903	0.716	0.783	1	Two-sided Wilcoxon test	0.25	5
Tmem243	0.000149627	-0.182553	0.235	0.337	1	Two-sided Wilcoxon test	0.25	5
Atad2b	0.000153458	-0.263972	0.669	0.751	1	Two-sided Wilcoxon test	0.25	5
Atp6v1g1	0.000154223	0.188831	0.568	0.446	1	Two-sided Wilcoxon test	0.25	5
Timm8b	0.000156749	0.244539	0.536	0.466	1	Two-sided Wilcoxon test	0.25	5
Smad2	0.000156788	-0.247116	0.583	0.657	1	Two-sided Wilcoxon test	0.25	5
4831440D22Rik	0.000159647	-0.0879101	0.068	0.144	1	Two-sided Wilcoxon test	0.25	5
Atat1	0.000161609	0.111454	0.247	0.141	1	Two-sided Wilcoxon test	0.25	5
C1qbp	0.000166233	0.283284	0.706	0.622	1	Two-sided Wilcoxon test	0.25	5
Grcc10	0.000167693	0.203152	0.463	0.343	1	Two-sided Wilcoxon test	0.25	5
Cbfa2t2	0.000167703	-0.318935	0.545	0.619	1	Two-sided Wilcoxon test	0.25	5
Nsmce1	0.000167747	0.192132	0.474	0.355	1	Two-sided Wilcoxon test	0.25	5
Rragd	0.000167887	-0.261309	0.498	0.584	1	Two-sided Wilcoxon test	0.25	5
Myl9	0.000169464	0.219481	0.851	0.818	1	Two-sided Wilcoxon test	0.25	5
Snu13	0.000169963	0.199005	0.615	0.516	1	Two-sided Wilcoxon test	0.25	5
Gpx3	0.000170594	0.376449	0.549	0.452	1	Two-sided Wilcoxon test	0.25	5
Yaf2	0.000171959	-0.261251	0.597	0.666	1	Two-sided Wilcoxon test	0.25	5
Stmn1	0.000172922	0.298049	0.789	0.745	1	Two-sided Wilcoxon test	0.25	5
Smim1	0.000172964	0.133934	0.239	0.138	1	Two-sided Wilcoxon test	0.25	5
Cox4i1	0.000173851	0.238122	0.875	0.88	1	Two-sided Wilcoxon test	0.25	5
Prdx1	0.000175665	0.245169	0.846	0.812	1	Two-sided Wilcoxon test	0.25	5
Nap1l1	0.000176729	0.249921	0.766	0.751	1	Two-sided Wilcoxon test	0.25	5
Dctpp1	0.000177662	0.246753	0.516	0.416	1	Two-sided Wilcoxon test	0.25	5
Nbea	0.00017795	-0.257576	0.826	0.877	1	Two-sided Wilcoxon test	0.25	5
Trpm3	0.00018004	0.142261	0.119	0.044	1	Two-sided Wilcoxon test	0.25	5
Wapl	0.000180401	-0.275139	0.67	0.724	1	Two-sided Wilcoxon test	0.25	5
Sorbs2	0.000183451	-0.268771	0.946	0.971	1	Two-sided Wilcoxon test	0.25	5
Pet100	0.000184472	0.147281	0.261	0.158	1	Two-sided Wilcoxon test	0.25	5
Rab8a	0.000187079	0.159163	0.364	0.252	1	Two-sided Wilcoxon test	0.25	5
Lamtor4	0.000188343	0.171969	0.433	0.326	1	Two-sided Wilcoxon test	0.25	5
Mcm9	0.000192887	-0.274004	0.343	0.434	1	Two-sided Wilcoxon test	0.25	5
Ralgapa2	0.000194992	-0.358859	0.631	0.686	1	Two-sided Wilcoxon test	0.25	5
Plagl1	0.000200074	-0.191186	0.661	0.748	1	Two-sided Wilcoxon test	0.25	5
Mrpl14	0.000200295	0.175097	0.433	0.314	1	Two-sided Wilcoxon test	0.25	5
AY036118	0.000205696	-0.187409	1	1	1	Two-sided Wilcoxon test	0.25	5
Map4k3	0.000208192	-0.316847	0.571	0.657	1	Two-sided Wilcoxon test	0.25	5
Nufip2	0.000212946	-0.226197	0.583	0.672	1	Two-sided Wilcoxon test	0.25	5
Hint2	0.000213504	0.142763	0.359	0.243	1	Two-sided Wilcoxon test	0.25	5
Rps27rt	0.000217181	0.0609831	0.106	0.038	1	Two-sided Wilcoxon test	0.25	5
Polr2k	0.000218168	0.150617	0.432	0.317	1	Two-sided Wilcoxon test	0.25	5
Ppp1r12b	0.000219061	-0.326117	0.797	0.833	1	Two-sided Wilcoxon test	0.25	5
Insyn2a	0.000220074	-0.133382	0.083	0.161	1	Two-sided Wilcoxon test	0.25	5
Zfp703	0.00022063	0.0713699	0.115	0.044	1	Two-sided Wilcoxon test	0.25	5
Fus	0.000222536	-0.230681	0.852	0.897	1	Two-sided Wilcoxon test	0.25	5
Ecm2	0.000222656	-0.0949817	0.042	0.103	1	Two-sided Wilcoxon test	0.25	5
Sfpq	0.00022614	-0.186605	0.771	0.88	1	Two-sided Wilcoxon test	0.25	5
1600010M07Rik	0.000229308	-0.169413	0.315	0.425	1	Two-sided Wilcoxon test	0.25	5
Jph2	0.000233203	-0.213638	0.8	0.845	1	Two-sided Wilcoxon test	0.25	5
Hdac9	0.000238309	-0.339368	0.786	0.818	1	Two-sided Wilcoxon test	0.25	5
Sox6	0.000248054	-0.346687	0.776	0.806	1	Two-sided Wilcoxon test	0.25	5
Ankrd24	0.000249585	-0.185085	0.128	0.208	1	Two-sided Wilcoxon test	0.25	5
Gm36146	0.000251691	-0.0746943	0.034	0.091	1	Two-sided Wilcoxon test	0.25	5
Gm7580	0.000252997	-0.0879972	0.021	0.067	1	Two-sided Wilcoxon test	0.25	5
Trmt112	0.000253373	0.273677	0.481	0.399	1	Two-sided Wilcoxon test	0.25	5
Rpl36a-ps1	0.000254812	0.0603171	0.131	0.056	1	Two-sided Wilcoxon test	0.25	5
Hif1a	0.000256294	-0.229312	0.795	0.859	1	Two-sided Wilcoxon test	0.25	5
Tlk1	0.00025903	-0.252083	0.752	0.801	1	Two-sided Wilcoxon test	0.25	5
Tjp1	0.000259824	-0.225856	0.617	0.701	1	Two-sided Wilcoxon test	0.25	5
Srpk2	0.000260207	-0.265855	0.69	0.73	1	Two-sided Wilcoxon test	0.25	5
mt-Nd4	0.000261853	0.246535	0.992	0.997	1	Two-sided Wilcoxon test	0.25	5
Ndufb5	0.000264381	0.257975	0.672	0.61	1	Two-sided Wilcoxon test	0.25	5
Filip1l	0.000269455	-0.238284	0.513	0.601	1	Two-sided Wilcoxon test	0.25	5
Col1a1	0.000270519	0.15416	0.269	0.161	1	Two-sided Wilcoxon test	0.25	5
Map3k5	0.000271375	-0.227888	0.528	0.636	1	Two-sided Wilcoxon test	0.25	5
Net1	0.000273827	0.133217	0.307	0.196	1	Two-sided Wilcoxon test	0.25	5
Eif2s3x	0.000273866	0.183698	0.463	0.355	1	Two-sided Wilcoxon test	0.25	5
Timm17b	0.000275469	0.146688	0.411	0.284	1	Two-sided Wilcoxon test	0.25	5
Psenen	0.000278075	0.229117	0.505	0.408	1	Two-sided Wilcoxon test	0.25	5
Bgn	0.000280466	0.0294201	0.097	0.032	1	Two-sided Wilcoxon test	0.25	5
Gm16068	0.000282555	-0.0845552	0.028	0.079	1	Two-sided Wilcoxon test	0.25	5
Selenop	0.000287744	0.063363	0.106	0.038	1	Two-sided Wilcoxon test	0.25	5
Stard10	0.000288807	0.136531	0.183	0.097	1	Two-sided Wilcoxon test	0.25	5
Cep350	0.000289413	-0.252366	0.549	0.625	1	Two-sided Wilcoxon test	0.25	5
Raph1	0.000293466	-0.246803	0.597	0.654	1	Two-sided Wilcoxon test	0.25	5
Tma7	0.000294036	0.250997	0.636	0.584	1	Two-sided Wilcoxon test	0.25	5
Polr2j	0.000298868	0.153369	0.498	0.387	1	Two-sided Wilcoxon test	0.25	5
Nrep	0.000300172	0.162977	0.378	0.261	1	Two-sided Wilcoxon test	0.25	5
Osbpl8	0.000302475	-0.316761	0.657	0.71	1	Two-sided Wilcoxon test	0.25	5
Phip	0.000302688	-0.234955	0.744	0.815	1	Two-sided Wilcoxon test	0.25	5
Gm42413	0.000302884	-0.0433185	0.013	0.053	1	Two-sided Wilcoxon test	0.25	5
Erh	0.000303652	-0.235082	0.64	0.716	1	Two-sided Wilcoxon test	0.25	5
Tmem98	0.00030406	0.10202	0.232	0.135	1	Two-sided Wilcoxon test	0.25	5
Mrpl33	0.000305366	0.175608	0.437	0.334	1	Two-sided Wilcoxon test	0.25	5
Map2k4	0.000307374	-0.207251	0.555	0.645	1	Two-sided Wilcoxon test	0.25	5
Gm20470	0.000308618	-0.0449903	0.018	0.062	1	Two-sided Wilcoxon test	0.25	5
Mrps24	0.000311637	0.209639	0.518	0.422	1	Two-sided Wilcoxon test	0.25	5
Pfkp	0.000313333	-0.270153	0.792	0.827	1	Two-sided Wilcoxon test	0.25	5
Ppp1r12a	0.000314562	-0.249782	0.907	0.938	1	Two-sided Wilcoxon test	0.25	5
Ntrk2	0.000315465	0.0747782	0.05	0.006	1	Two-sided Wilcoxon test	0.25	5
Hmga2	0.000317752	0.361341	0.635	0.543	1	Two-sided Wilcoxon test	0.25	5
Obscn	0.000318544	-0.225701	0.55	0.636	1	Two-sided Wilcoxon test	0.25	5
Tnfaip1	0.000326323	0.102211	0.334	0.22	1	Two-sided Wilcoxon test	0.25	5
Lmf2	0.000326933	0.074189	0.143	0.065	1	Two-sided Wilcoxon test	0.25	5
Huwe1	0.000329695	-0.186437	0.888	0.921	1	Two-sided Wilcoxon test	0.25	5
Rnaseh2c	0.000330569	0.137081	0.484	0.37	1	Two-sided Wilcoxon test	0.25	5
Thsd7a	0.000334318	-0.436382	0.222	0.311	1	Two-sided Wilcoxon test	0.25	5
Mad2l1	0.000336245	0.0949639	0.247	0.147	1	Two-sided Wilcoxon test	0.25	5
Meis1	0.00034236	-0.202328	0.864	0.874	1	Two-sided Wilcoxon test	0.25	5
Tpm1	0.000343047	0.198163	1	1	1	Two-sided Wilcoxon test	0.25	5
Erc2	0.000346755	-0.340513	0.506	0.587	1	Two-sided Wilcoxon test	0.25	5
Gm42701	0.000348683	-0.0970197	0.067	0.135	1	Two-sided Wilcoxon test	0.25	5
Mta2	0.000350468	0.0994199	0.341	0.223	1	Two-sided Wilcoxon test	0.25	5
Fabp5	0.000352218	0.438223	0.735	0.686	1	Two-sided Wilcoxon test	0.25	5
Cpeb3	0.00035559	-0.282344	0.464	0.563	1	Two-sided Wilcoxon test	0.25	5
4930455C13Rik	0.000356618	-0.205232	0.088	0.161	1	Two-sided Wilcoxon test	0.25	5
Gm14211	0.000357334	-0.0481509	0.041	0.1	1	Two-sided Wilcoxon test	0.25	5
Ran	0.000363312	0.293132	0.817	0.792	1	Two-sided Wilcoxon test	0.25	5
Tnrc6b	0.000366544	-0.240583	0.781	0.83	1	Two-sided Wilcoxon test	0.25	5
Mt2	0.000368345	0.144473	0.167	0.082	1	Two-sided Wilcoxon test	0.25	5
Borcs7	0.000369118	0.0844933	0.307	0.194	1	Two-sided Wilcoxon test	0.25	5
Rtraf	0.000369321	0.228455	0.617	0.513	1	Two-sided Wilcoxon test	0.25	5
Oat	0.000370686	0.218153	0.471	0.372	1	Two-sided Wilcoxon test	0.25	5
Safb2	0.000373336	-0.230304	0.313	0.402	1	Two-sided Wilcoxon test	0.25	5
Rpn1	0.000373715	0.148258	0.482	0.361	1	Two-sided Wilcoxon test	0.25	5
Samd14	0.000381247	0.0677816	0.112	0.044	1	Two-sided Wilcoxon test	0.25	5
Taf15	0.000387328	-0.199119	0.638	0.707	1	Two-sided Wilcoxon test	0.25	5
Otud4	0.000387647	-0.184592	0.575	0.642	1	Two-sided Wilcoxon test	0.25	5
Snai2	0.000392007	0.0394511	0.071	0.018	1	Two-sided Wilcoxon test	0.25	5
Syne1	0.00039528	-0.262664	0.534	0.619	1	Two-sided Wilcoxon test	0.25	5
E530011L22Rik	0.000399309	-0.0758994	0.114	0.199	1	Two-sided Wilcoxon test	0.25	5
Pcbp2	0.000408101	0.234792	0.776	0.777	1	Two-sided Wilcoxon test	0.25	5
Trappc3	0.000412703	0.12746	0.36	0.243	1	Two-sided Wilcoxon test	0.25	5
Eif3k	0.000413373	0.23137	0.609	0.528	1	Two-sided Wilcoxon test	0.25	5
Snrpc	0.000418359	0.214222	0.571	0.501	1	Two-sided Wilcoxon test	0.25	5
Gli2	0.000430733	0.150421	0.255	0.152	1	Two-sided Wilcoxon test	0.25	5
Kif5b	0.000431918	-0.196537	0.847	0.874	1	Two-sided Wilcoxon test	0.25	5
Zfyve9	0.000432361	-0.288917	0.544	0.598	1	Two-sided Wilcoxon test	0.25	5
Elac2	0.000432728	0.0918283	0.149	0.07	1	Two-sided Wilcoxon test	0.25	5
Scx	0.000434441	0.0495827	0.065	0.015	1	Two-sided Wilcoxon test	0.25	5
Nup98	0.000437472	-0.273786	0.586	0.66	1	Two-sided Wilcoxon test	0.25	5
Slc9a3r1	0.000440513	0.0779203	0.099	0.035	1	Two-sided Wilcoxon test	0.25	5
Polr2f	0.000445074	0.191889	0.549	0.466	1	Two-sided Wilcoxon test	0.25	5
Rsf1os2	0.000445753	-0.0735984	0.05	0.111	1	Two-sided Wilcoxon test	0.25	5
Acsl4	0.000447588	-0.235713	0.435	0.525	1	Two-sided Wilcoxon test	0.25	5
Lgr4	0.000447899	-0.179678	0.653	0.707	1	Two-sided Wilcoxon test	0.25	5
Cdk13	0.000449192	-0.188162	0.708	0.762	1	Two-sided Wilcoxon test	0.25	5
Cblb	0.000451361	-0.276299	0.669	0.721	1	Two-sided Wilcoxon test	0.25	5
Calm3	0.000453131	0.196041	0.578	0.487	1	Two-sided Wilcoxon test	0.25	5
Oxr1	0.000463833	-0.391907	0.672	0.713	1	Two-sided Wilcoxon test	0.25	5
Nenf	0.000473029	0.196511	0.404	0.29	1	Two-sided Wilcoxon test	0.25	5
Ppp1r7	0.000475074	0.177216	0.445	0.328	1	Two-sided Wilcoxon test	0.25	5
Rptor	0.000476462	-0.198703	0.675	0.757	1	Two-sided Wilcoxon test	0.25	5
Ackr3	0.000476471	0.0825124	0.089	0.029	1	Two-sided Wilcoxon test	0.25	5
Rpp25l	0.000478405	0.112412	0.287	0.182	1	Two-sided Wilcoxon test	0.25	5
Pygb	0.000483731	-0.232912	0.584	0.669	1	Two-sided Wilcoxon test	0.25	5
Fgf12	0.000484282	0.135009	0.167	0.085	1	Two-sided Wilcoxon test	0.25	5
Fcho2	0.00048456	-0.264559	0.583	0.677	1	Two-sided Wilcoxon test	0.25	5
Trf	0.000484952	0.061621	0.065	0.015	1	Two-sided Wilcoxon test	0.25	5
Rpl5	0.00048543	0.170143	0.95	0.956	1	Two-sided Wilcoxon test	0.25	5
Ebpl	0.000489554	0.121042	0.292	0.191	1	Two-sided Wilcoxon test	0.25	5
Suz12	0.000496903	-0.238806	0.633	0.68	1	Two-sided Wilcoxon test	0.25	5
Rnpep	0.000497283	0.147249	0.282	0.179	1	Two-sided Wilcoxon test	0.25	5
Wfdc2	0.00050154	0.0540289	0.054	0.009	1	Two-sided Wilcoxon test	0.25	5
Atrn	0.000503958	-0.261852	0.364	0.455	1	Two-sided Wilcoxon test	0.25	5
Rac1	0.000505657	0.185302	0.631	0.525	1	Two-sided Wilcoxon test	0.25	5
Foxc1	0.000506282	0.0450774	0.089	0.029	1	Two-sided Wilcoxon test	0.25	5
Gm28376	0.000507242	-0.235131	0.156	0.24	1	Two-sided Wilcoxon test	0.25	5
Slc25a13	0.000507243	-0.273019	0.593	0.666	1	Two-sided Wilcoxon test	0.25	5
Fundc2	0.00052636	0.19683	0.531	0.434	1	Two-sided Wilcoxon test	0.25	5
Ddost	0.000532634	0.224293	0.544	0.449	1	Two-sided Wilcoxon test	0.25	5
Hace1	0.000537481	-0.204915	0.346	0.428	1	Two-sided Wilcoxon test	0.25	5
Rassf8	0.00054221	-0.280596	0.607	0.689	1	Two-sided Wilcoxon test	0.25	5
Man1a2	0.000546443	-0.240243	0.636	0.677	1	Two-sided Wilcoxon test	0.25	5
Ccdc167	0.000548438	0.102255	0.209	0.12	1	Two-sided Wilcoxon test	0.25	5
Zfp503	0.000560112	0.0794149	0.162	0.082	1	Two-sided Wilcoxon test	0.25	5
Nme1	0.000564903	0.248093	0.685	0.639	1	Two-sided Wilcoxon test	0.25	5
Lsm4	0.000568179	0.245862	0.599	0.548	1	Two-sided Wilcoxon test	0.25	5
Myom1	0.000569556	-0.235818	0.919	0.938	1	Two-sided Wilcoxon test	0.25	5
Nsa2	0.000572885	0.262026	0.554	0.472	1	Two-sided Wilcoxon test	0.25	5
D8Ertd738e	0.000580101	0.23332	0.62	0.563	1	Two-sided Wilcoxon test	0.25	5
Vim	0.000598239	-0.291185	0.807	0.868	1	Two-sided Wilcoxon test	0.25	5
Clmn	0.000601271	0.0551243	0.083	0.026	1	Two-sided Wilcoxon test	0.25	5
Adk	0.000603101	-0.216204	0.912	0.909	1	Two-sided Wilcoxon test	0.25	5
Gpr183	0.000606195	-0.0775152	0.019	0.062	1	Two-sided Wilcoxon test	0.25	5
Rida	0.000609749	0.0111863	0.097	0.035	1	Two-sided Wilcoxon test	0.25	5
Lage3	0.000622233	0.135131	0.427	0.314	1	Two-sided Wilcoxon test	0.25	5
Ncoa7	0.000623422	-0.253436	0.412	0.501	1	Two-sided Wilcoxon test	0.25	5
Thoc2	0.000628287	-0.222828	0.756	0.815	1	Two-sided Wilcoxon test	0.25	5
Cenpx	0.000629398	0.173951	0.409	0.296	1	Two-sided Wilcoxon test	0.25	5
Dgcr6	0.000632196	0.127127	0.321	0.214	1	Two-sided Wilcoxon test	0.25	5
Gm36388	0.000634708	-0.137696	0.062	0.126	1	Two-sided Wilcoxon test	0.25	5
Ier3ip1	0.000635582	0.143406	0.455	0.334	1	Two-sided Wilcoxon test	0.25	5
Srsf11	0.000653049	-0.232339	0.766	0.827	1	Two-sided Wilcoxon test	0.25	5
Trappc2l	0.000657371	0.130897	0.373	0.261	1	Two-sided Wilcoxon test	0.25	5
Mtss1	0.000660122	-0.230173	0.841	0.897	1	Two-sided Wilcoxon test	0.25	5
1810037I17Rik	0.000663277	0.179609	0.5	0.396	1	Two-sided Wilcoxon test	0.25	5
Commd3	0.000667558	0.10542	0.412	0.311	1	Two-sided Wilcoxon test	0.25	5
Eps8	0.000672053	0.113818	0.172	0.091	1	Two-sided Wilcoxon test	0.25	5
Sod1	0.000672824	0.147031	0.386	0.279	1	Two-sided Wilcoxon test	0.25	5
Tuba1a	0.00068038	0.200732	0.727	0.648	1	Two-sided Wilcoxon test	0.25	5
Prdx2	0.000681668	0.21048	0.834	0.824	1	Two-sided Wilcoxon test	0.25	5
Arih1	0.000683842	-0.27657	0.828	0.889	1	Two-sided Wilcoxon test	0.25	5
Tmem135	0.000686628	-0.273309	0.609	0.66	1	Two-sided Wilcoxon test	0.25	5
Gm28379	0.000686782	-0.194122	0.102	0.176	1	Two-sided Wilcoxon test	0.25	5
Fli1	0.000689625	0.0642621	0.14	0.065	1	Two-sided Wilcoxon test	0.25	5
Arid2	0.000696854	-0.21823	0.617	0.71	1	Two-sided Wilcoxon test	0.25	5
Ptpru	0.000698897	0.0321167	0.052	0.009	1	Two-sided Wilcoxon test	0.25	5
Mib1	0.000699362	-0.200465	0.661	0.742	1	Two-sided Wilcoxon test	0.25	5
Lrig3	0.000711196	0.0489722	0.104	0.041	1	Two-sided Wilcoxon test	0.25	5
Slc4a4	0.000715289	-0.382589	0.476	0.548	1	Two-sided Wilcoxon test	0.25	5
Phf5a	0.000721874	0.161877	0.588	0.484	1	Two-sided Wilcoxon test	0.25	5
Itch	0.000722226	-0.181538	0.58	0.648	1	Two-sided Wilcoxon test	0.25	5
Atp5c1	0.000728847	0.20265	0.778	0.73	1	Two-sided Wilcoxon test	0.25	5
Mgst3	0.000731261	0.286015	0.388	0.287	1	Two-sided Wilcoxon test	0.25	5
Hist1h3e	0.000731279	0.048951	0.177	0.091	1	Two-sided Wilcoxon test	0.25	5
Mbnl2	0.000737664	-0.307443	0.839	0.9	1	Two-sided Wilcoxon test	0.25	5
Pdgfra	0.000742387	0.0717688	0.153	0.076	1	Two-sided Wilcoxon test	0.25	5
Orc4	0.000743106	-0.205825	0.497	0.569	1	Two-sided Wilcoxon test	0.25	5
Clic4	0.000745241	-0.212939	0.768	0.815	1	Two-sided Wilcoxon test	0.25	5
Gpbp1	0.000750098	-0.259541	0.625	0.666	1	Two-sided Wilcoxon test	0.25	5
Smarcb1	0.000750164	0.165146	0.472	0.372	1	Two-sided Wilcoxon test	0.25	5
Twist2	0.000751722	0.0397823	0.091	0.032	1	Two-sided Wilcoxon test	0.25	5
Tmem87a	0.000757988	-0.191434	0.38	0.472	1	Two-sided Wilcoxon test	0.25	5
Purb	0.000762856	0.228189	0.607	0.504	1	Two-sided Wilcoxon test	0.25	5
Bnc2	0.00076697	0.269211	0.162	0.085	1	Two-sided Wilcoxon test	0.25	5
Crtap	0.000769982	0.0979165	0.305	0.199	1	Two-sided Wilcoxon test	0.25	5
4930556J24Rik	0.000773788	-0.124892	0.062	0.123	1	Two-sided Wilcoxon test	0.25	5
Arid4b	0.000774105	-0.289623	0.794	0.827	1	Two-sided Wilcoxon test	0.25	5
Pigx	0.000778009	0.139972	0.378	0.276	1	Two-sided Wilcoxon test	0.25	5
1110008P14Rik	0.00078266	0.12614	0.308	0.205	1	Two-sided Wilcoxon test	0.25	5
1700109K24Rik	0.000787674	-0.130203	0.154	0.243	1	Two-sided Wilcoxon test	0.25	5
Ap2s1	0.000789614	0.15578	0.485	0.381	1	Two-sided Wilcoxon test	0.25	5
Gm14164	0.000798267	0.0312484	0.076	0.023	1	Two-sided Wilcoxon test	0.25	5
Trim55	0.000798392	-0.236086	0.836	0.894	1	Two-sided Wilcoxon test	0.25	5
Arhgap21	0.000800335	-0.283037	0.682	0.718	1	Two-sided Wilcoxon test	0.25	5
Rbp4	0.000809028	0.152616	0.089	0.032	1	Two-sided Wilcoxon test	0.25	5
Gm50044	0.000812857	-0.0753343	0.055	0.117	1	Two-sided Wilcoxon test	0.25	5
Stambp	0.000816953	0.0944095	0.261	0.161	1	Two-sided Wilcoxon test	0.25	5
Mex3a	0.000819734	0.0893185	0.242	0.155	1	Two-sided Wilcoxon test	0.25	5
Ncoa2	0.000821768	-0.251562	0.742	0.792	1	Two-sided Wilcoxon test	0.25	5
Akap13	0.000824993	-0.253385	0.89	0.947	1	Two-sided Wilcoxon test	0.25	5
Itsn1	0.000829131	-0.296441	0.528	0.587	1	Two-sided Wilcoxon test	0.25	5
Ss18l2	0.00083236	0.15698	0.362	0.27	1	Two-sided Wilcoxon test	0.25	5
Cenpw	0.000834273	0.196257	0.325	0.226	1	Two-sided Wilcoxon test	0.25	5
Jmy	0.000836909	-0.177811	0.464	0.543	1	Two-sided Wilcoxon test	0.25	5
Myh6	0.000850575	0.244781	0.946	0.903	1	Two-sided Wilcoxon test	0.25	5
Smim11	0.000856251	0.143244	0.401	0.29	1	Two-sided Wilcoxon test	0.25	5
Large1	0.000856392	-0.251456	0.75	0.801	1	Two-sided Wilcoxon test	0.25	5
Eml4	0.000861494	-0.186629	0.706	0.801	1	Two-sided Wilcoxon test	0.25	5
Alx1	0.000863297	0.0446524	0.071	0.021	1	Two-sided Wilcoxon test	0.25	5
Cux1	0.000864899	-0.274322	0.852	0.889	1	Two-sided Wilcoxon test	0.25	5
Eny2	0.000868782	0.150421	0.659	0.61	1	Two-sided Wilcoxon test	0.25	5
Rbm20	0.000877508	-0.23071	0.955	0.95	1	Two-sided Wilcoxon test	0.25	5
3110021N24Rik	0.000890004	-0.177694	0.157	0.24	1	Two-sided Wilcoxon test	0.25	5
mt-Nd5	0.000903259	0.23264	0.974	0.965	1	Two-sided Wilcoxon test	0.25	5
Tmsb4x	0.000904166	0.27688	0.987	0.982	1	Two-sided Wilcoxon test	0.25	5
Wdr33	0.000906652	-0.13595	0.742	0.789	1	Two-sided Wilcoxon test	0.25	5
Chchd2	0.000907235	0.181953	0.87	0.868	1	Two-sided Wilcoxon test	0.25	5
Srp9	0.000912319	0.205588	0.593	0.499	1	Two-sided Wilcoxon test	0.25	5
Gm43050	0.000915372	0.0741279	0.08	0.026	1	Two-sided Wilcoxon test	0.25	5
Stag1	0.000920827	-0.281087	0.836	0.918	1	Two-sided Wilcoxon test	0.25	5
Spock1	0.000925654	0.0625081	0.067	0.018	1	Two-sided Wilcoxon test	0.25	5
Hivep2	0.000938572	-0.288876	0.565	0.625	1	Two-sided Wilcoxon test	0.25	5
Smad4	0.000940926	0.266259	0.589	0.499	1	Two-sided Wilcoxon test	0.25	5
Cspg4	0.000941931	-0.13467	0.295	0.381	1	Two-sided Wilcoxon test	0.25	5
Polr2l	0.000947328	0.0621719	0.179	0.097	1	Two-sided Wilcoxon test	0.25	5
Gtf2h5	0.000948965	0.172606	0.583	0.501	1	Two-sided Wilcoxon test	0.25	5
Mmp2	0.000950294	0.0268864	0.091	0.032	1	Two-sided Wilcoxon test	0.25	5
Rnf113a2	0.000951134	0.0748776	0.198	0.114	1	Two-sided Wilcoxon test	0.25	5
Ndufa10	0.000952715	0.193663	0.672	0.578	1	Two-sided Wilcoxon test	0.25	5
Rab14	0.000954531	-0.207744	0.653	0.704	1	Two-sided Wilcoxon test	0.25	5
Pbx3	0.00095465	-0.333081	0.696	0.757	1	Two-sided Wilcoxon test	0.25	5
Pan3	0.000960201	-0.2229	0.633	0.695	1	Two-sided Wilcoxon test	0.25	5
Wnt2	0.000971559	0.172176	0.143	0.07	1	Two-sided Wilcoxon test	0.25	5
Gm12227	0.000972678	-0.0635084	0.024	0.067	1	Two-sided Wilcoxon test	0.25	5
Itpr2	0.000979685	-0.22274	0.325	0.411	1	Two-sided Wilcoxon test	0.25	5
Med7	0.000984627	0.0807208	0.297	0.196	1	Two-sided Wilcoxon test	0.25	5
Plpp3	0.00099045	0.0488146	0.195	0.106	1	Two-sided Wilcoxon test	0.25	5
Neo1	0.000993071	-0.217245	0.765	0.818	1	Two-sided Wilcoxon test	0.25	5
Cox20	0.000997501	0.121664	0.422	0.308	1	Two-sided Wilcoxon test	0.25	5
Gm42067	0.00100055	0.0364384	0.055	0.012	1	Two-sided Wilcoxon test	0.25	5
Serf1	0.00100412	0.148421	0.343	0.246	1	Two-sided Wilcoxon test	0.25	5
Snhg8	0.00101684	0.088297	0.247	0.158	1	Two-sided Wilcoxon test	0.25	5
Gm14798	0.00102113	-0.0269964	0.047	0.103	1	Two-sided Wilcoxon test	0.25	5
Rabgap1l	0.00102465	-0.264339	0.846	0.88	1	Two-sided Wilcoxon test	0.25	5
Ddx3x	0.00103584	0.170693	0.67	0.604	1	Two-sided Wilcoxon test	0.25	5
Gm48765	0.00103724	-0.217959	0.13	0.205	1	Two-sided Wilcoxon test	0.25	5
Crispld1	0.00104017	0.0785091	0.13	0.062	1	Two-sided Wilcoxon test	0.25	5
Slc12a6	0.00104851	-0.245226	0.373	0.455	1	Two-sided Wilcoxon test	0.25	5
H2afz	0.00105261	0.170377	0.925	0.941	1	Two-sided Wilcoxon test	0.25	5
Memo1	0.00106563	-0.243055	0.649	0.721	1	Two-sided Wilcoxon test	0.25	5
Tmem147	0.00107245	0.205185	0.468	0.375	1	Two-sided Wilcoxon test	0.25	5
Mrpl17	0.00107702	0.11199	0.326	0.226	1	Two-sided Wilcoxon test	0.25	5
Rsrp1	0.00107794	-0.242011	0.666	0.716	1	Two-sided Wilcoxon test	0.25	5
Atxn1	0.00108009	-0.208885	0.881	0.918	1	Two-sided Wilcoxon test	0.25	5
Col24a1	0.00108036	0.029985	0.055	0.012	1	Two-sided Wilcoxon test	0.25	5
Naa10	0.0010876	0.103529	0.304	0.196	1	Two-sided Wilcoxon test	0.25	5
Kcnn2	0.00108813	-0.33172	0.703	0.718	1	Two-sided Wilcoxon test	0.25	5
Lypla2	0.00111537	0.0957466	0.193	0.114	1	Two-sided Wilcoxon test	0.25	5
Rgs10	0.0011202	0.0932222	0.18	0.1	1	Two-sided Wilcoxon test	0.25	5
Gm35533	0.00112114	-0.109965	0.049	0.103	1	Two-sided Wilcoxon test	0.25	5
H3f3a	0.00113803	0.195658	0.938	0.953	1	Two-sided Wilcoxon test	0.25	5
Sys1	0.00114071	0.14994	0.304	0.208	1	Two-sided Wilcoxon test	0.25	5
Arhgap28	0.0011489	0.127041	0.305	0.205	1	Two-sided Wilcoxon test	0.25	5
Loxl1	0.00115155	0.0910658	0.193	0.114	1	Two-sided Wilcoxon test	0.25	5
Hmgxb4	0.00116979	-0.124041	0.279	0.367	1	Two-sided Wilcoxon test	0.25	5
Gnb2	0.00118284	0.219714	0.594	0.51	1	Two-sided Wilcoxon test	0.25	5
Gm37982	0.001183	-0.0871879	0.133	0.211	1	Two-sided Wilcoxon test	0.25	5
Gm49915	0.00118388	-0.0899014	0.044	0.097	1	Two-sided Wilcoxon test	0.25	5
Wasf3	0.0011946	0.0162906	0.07	0.021	1	Two-sided Wilcoxon test	0.25	5
Tbx18	0.00119577	0.177913	0.18	0.103	1	Two-sided Wilcoxon test	0.25	5
Cog5	0.0011964	-0.226232	0.737	0.76	1	Two-sided Wilcoxon test	0.25	5
Ptov1	0.00119913	0.176624	0.542	0.455	1	Two-sided Wilcoxon test	0.25	5
Polr2a	0.00120744	0.166642	0.422	0.331	1	Two-sided Wilcoxon test	0.25	5
Sox11	0.00121544	0.302373	0.506	0.428	1	Two-sided Wilcoxon test	0.25	5
Swi5	0.00123347	0.148333	0.64	0.563	1	Two-sided Wilcoxon test	0.25	5
Pdzd2	0.00123391	-0.316571	0.492	0.557	1	Two-sided Wilcoxon test	0.25	5
Psma7	0.00123756	0.179573	0.747	0.692	1	Two-sided Wilcoxon test	0.25	5
Dstn	0.00124498	0.250583	0.846	0.812	1	Two-sided Wilcoxon test	0.25	5
Snrpb2	0.00124507	0.167425	0.455	0.352	1	Two-sided Wilcoxon test	0.25	5
Gm46367	0.00125013	-0.168435	0.266	0.355	1	Two-sided Wilcoxon test	0.25	5
Pik3c2a	0.00125018	-0.260489	0.524	0.592	1	Two-sided Wilcoxon test	0.25	5
Cnot4	0.00125992	-0.228802	0.666	0.733	1	Two-sided Wilcoxon test	0.25	5
Pde4dip	0.00126177	-0.225478	0.776	0.853	1	Two-sided Wilcoxon test	0.25	5
Grik4	0.00127193	0.0914838	0.078	0.026	1	Two-sided Wilcoxon test	0.25	5
Ldb2	0.00127502	0.128734	0.117	0.053	1	Two-sided Wilcoxon test	0.25	5
Mettl15	0.00127659	-0.260236	0.227	0.299	1	Two-sided Wilcoxon test	0.25	5
Cmc2	0.001289	0.132131	0.416	0.32	1	Two-sided Wilcoxon test	0.25	5
Gm10076	0.00129445	0.233999	0.708	0.701	1	Two-sided Wilcoxon test	0.25	5
Lmo7	0.0012964	-0.164215	0.745	0.792	1	Two-sided Wilcoxon test	0.25	5
Phkb	0.00130017	-0.279143	0.571	0.63	1	Two-sided Wilcoxon test	0.25	5
Snrpd3	0.00130334	0.18978	0.614	0.545	1	Two-sided Wilcoxon test	0.25	5
Hoxa5	0.00130354	0.0755893	0.058	0.015	1	Two-sided Wilcoxon test	0.25	5
Rtca	0.00130385	0.0539316	0.245	0.152	1	Two-sided Wilcoxon test	0.25	5
Rev3l	0.00131812	-0.283154	0.758	0.804	1	Two-sided Wilcoxon test	0.25	5
Terf1	0.00132429	-0.249607	0.37	0.446	1	Two-sided Wilcoxon test	0.25	5
Rbm3	0.0013271	0.196675	0.789	0.718	1	Two-sided Wilcoxon test	0.25	5
Lockd	0.00133399	0.10833	0.157	0.085	1	Two-sided Wilcoxon test	0.25	5
Zfp827	0.0013364	-0.178577	0.692	0.783	1	Two-sided Wilcoxon test	0.25	5
Atp5o	0.00134127	0.198095	0.844	0.853	1	Two-sided Wilcoxon test	0.25	5
Gpd1	0.00134628	0.0446154	0.054	0.012	1	Two-sided Wilcoxon test	0.25	5
Sync	0.00137062	-0.0695037	0.042	0.094	1	Two-sided Wilcoxon test	0.25	5
Rpl10-ps3	0.00137657	0.0386557	0.133	0.065	1	Two-sided Wilcoxon test	0.25	5
Ncor1	0.00137768	-0.167324	0.799	0.856	1	Two-sided Wilcoxon test	0.25	5
R3hdm2	0.00137884	-0.220091	0.61	0.674	1	Two-sided Wilcoxon test	0.25	5
Pde7b	0.00138625	-0.310651	0.174	0.252	1	Two-sided Wilcoxon test	0.25	5
Arl8a	0.00139887	0.0913271	0.234	0.144	1	Two-sided Wilcoxon test	0.25	5
Mrps36	0.00140897	0.13771	0.489	0.387	1	Two-sided Wilcoxon test	0.25	5
Pdlim7	0.00141011	0.211082	0.693	0.651	1	Two-sided Wilcoxon test	0.25	5
Igf1r	0.00141128	-0.306642	0.917	0.938	1	Two-sided Wilcoxon test	0.25	5
Slc16a4	0.00142785	-0.150909	0.172	0.255	1	Two-sided Wilcoxon test	0.25	5
Safb	0.00143576	-0.230451	0.505	0.572	1	Two-sided Wilcoxon test	0.25	5
Yif1a	0.00143771	0.0776445	0.383	0.276	1	Two-sided Wilcoxon test	0.25	5
9930021J03Rik	0.00144258	-0.215319	0.526	0.584	1	Two-sided Wilcoxon test	0.25	5
Vcam1	0.00144373	0.149169	0.43	0.328	1	Two-sided Wilcoxon test	0.25	5
Mplkip	0.00145093	0.0976421	0.266	0.176	1	Two-sided Wilcoxon test	0.25	5
Phactr2	0.00146201	-0.245673	0.667	0.713	1	Two-sided Wilcoxon test	0.25	5
Jmjd1c	0.00146995	-0.296013	0.821	0.836	1	Two-sided Wilcoxon test	0.25	5
Mettl21c	0.00148454	-0.0679988	0.031	0.076	1	Two-sided Wilcoxon test	0.25	5
Cenpm	0.00148564	0.127086	0.229	0.144	1	Two-sided Wilcoxon test	0.25	5
Brinp1	0.00149137	0.0667693	0.063	0.018	1	Two-sided Wilcoxon test	0.25	5
Megf6	0.00149137	0.037342	0.063	0.018	1	Two-sided Wilcoxon test	0.25	5
Pappa	0.00150341	0.0549854	0.073	0.023	1	Two-sided Wilcoxon test	0.25	5
Gstm5	0.00150909	0.122257	0.407	0.299	1	Two-sided Wilcoxon test	0.25	5
Gm12592	0.00151094	-0.164669	0.136	0.208	1	Two-sided Wilcoxon test	0.25	5
Fmc1	0.00151523	0.155925	0.407	0.311	1	Two-sided Wilcoxon test	0.25	5
Zfp521	0.00152354	-0.364602	0.795	0.839	1	Two-sided Wilcoxon test	0.25	5
Rex1bd	0.00152669	0.149651	0.44	0.34	1	Two-sided Wilcoxon test	0.25	5
Gm43258	0.00153548	-0.126067	0.081	0.144	1	Two-sided Wilcoxon test	0.25	5
Maged1	0.00154138	0.198779	0.692	0.663	1	Two-sided Wilcoxon test	0.25	5
Idh2	0.00154724	0.200387	0.862	0.792	1	Two-sided Wilcoxon test	0.25	5
Kcnq1	0.0015512	-0.260161	0.317	0.384	1	Two-sided Wilcoxon test	0.25	5
Gphn	0.00156924	-0.207103	0.841	0.877	1	Two-sided Wilcoxon test	0.25	5
Pms1	0.00158726	-0.203747	0.192	0.264	1	Two-sided Wilcoxon test	0.25	5
Rap1gds1	0.00158744	-0.218822	0.644	0.68	1	Two-sided Wilcoxon test	0.25	5
4930444A19Rik	0.00159567	-0.177695	0.076	0.138	1	Two-sided Wilcoxon test	0.25	5
Pcolce	0.00159961	0.0866231	0.318	0.217	1	Two-sided Wilcoxon test	0.25	5
Dnajc19	0.00161634	-0.228762	0.524	0.569	1	Two-sided Wilcoxon test	0.25	5
Tnfrsf10b	0.00161765	0.0452345	0.057	0.015	1	Two-sided Wilcoxon test	0.25	5
Chchd1	0.00162837	0.163393	0.516	0.431	1	Two-sided Wilcoxon test	0.25	5
Fxn	0.00163643	0.148916	0.328	0.235	1	Two-sided Wilcoxon test	0.25	5
Gm47027	0.00164919	-0.0537325	0.031	0.076	1	Two-sided Wilcoxon test	0.25	5
Slc25a17	0.00165169	0.0605874	0.3	0.199	1	Two-sided Wilcoxon test	0.25	5
Gpr18	0.00165666	-0.0929509	0.065	0.123	1	Two-sided Wilcoxon test	0.25	5
Pcgf5	0.00165969	-0.202272	0.541	0.604	1	Two-sided Wilcoxon test	0.25	5
Cks1b	0.00167574	0.213475	0.62	0.551	1	Two-sided Wilcoxon test	0.25	5
Banf1	0.0017152	0.163293	0.641	0.572	1	Two-sided Wilcoxon test	0.25	5
Gm11361	0.00173328	0.0392502	0.052	0.012	1	Two-sided Wilcoxon test	0.25	5
Capzb	0.00174485	0.169925	0.661	0.616	1	Two-sided Wilcoxon test	0.25	5
Inpp5a	0.00175099	-0.230955	0.685	0.748	1	Two-sided Wilcoxon test	0.25	5
Crip2	0.00175272	0.288252	0.804	0.783	1	Two-sided Wilcoxon test	0.25	5
6530409C15Rik	0.00175414	-0.0942146	0.114	0.188	1	Two-sided Wilcoxon test	0.25	5
Dynlrb1	0.00176134	0.209197	0.596	0.516	1	Two-sided Wilcoxon test	0.25	5
Qrich1	0.00176325	-0.184007	0.554	0.642	1	Two-sided Wilcoxon test	0.25	5
Fer	0.00176597	-0.268952	0.581	0.625	1	Two-sided Wilcoxon test	0.25	5
Angpt2	0.00177519	-0.133508	0.131	0.205	1	Two-sided Wilcoxon test	0.25	5
Rbsn	0.00177715	-0.11558	0.159	0.229	1	Two-sided Wilcoxon test	0.25	5
Colgalt1	0.00177999	0.105506	0.36	0.264	1	Two-sided Wilcoxon test	0.25	5
Tmem108	0.00179415	-0.328544	0.758	0.812	1	Two-sided Wilcoxon test	0.25	5
Runx1	0.00179486	0.0517399	0.102	0.044	1	Two-sided Wilcoxon test	0.25	5
Polr3h	0.00180354	-0.242109	0.235	0.314	1	Two-sided Wilcoxon test	0.25	5
Homer1	0.00180858	-0.243086	0.526	0.619	1	Two-sided Wilcoxon test	0.25	5
Ccnt2	0.0018112	-0.250916	0.503	0.56	1	Two-sided Wilcoxon test	0.25	5
Gm3235	0.00181587	-0.0466229	0.028	0.07	1	Two-sided Wilcoxon test	0.25	5
Gm16093	0.00182533	-0.185845	0.133	0.205	1	Two-sided Wilcoxon test	0.25	5
Tbx3	0.00182754	0.111898	0.149	0.079	1	Two-sided Wilcoxon test	0.25	5
Ccnd2	0.00182769	0.301024	0.688	0.63	1	Two-sided Wilcoxon test	0.25	5
Rbm39	0.00183568	-0.161311	0.922	0.965	1	Two-sided Wilcoxon test	0.25	5
Bcam	0.00183737	0.15992	0.448	0.355	1	Two-sided Wilcoxon test	0.25	5
Cmtm3	0.00186962	0.0726354	0.174	0.097	1	Two-sided Wilcoxon test	0.25	5
Gtf3a	0.00187144	0.0906262	0.282	0.191	1	Two-sided Wilcoxon test	0.25	5
Raf1	0.00188806	-0.180891	0.57	0.616	1	Two-sided Wilcoxon test	0.25	5
Glipr2	0.00190087	0.118825	0.328	0.229	1	Two-sided Wilcoxon test	0.25	5
Slc16a3	0.00190995	-0.182284	0.542	0.592	1	Two-sided Wilcoxon test	0.25	5
Ago2	0.00192084	-0.184051	0.666	0.724	1	Two-sided Wilcoxon test	0.25	5
Gm47207	0.00192439	-0.067617	0.023	0.062	1	Two-sided Wilcoxon test	0.25	5
Sbno1	0.00192771	-0.190135	0.657	0.718	1	Two-sided Wilcoxon test	0.25	5
Zc3h13	0.00194308	-0.178079	0.521	0.604	1	Two-sided Wilcoxon test	0.25	5
Wwc2	0.00194851	-0.195562	0.752	0.801	1	Two-sided Wilcoxon test	0.25	5
Numb	0.00195768	-0.226285	0.638	0.707	1	Two-sided Wilcoxon test	0.25	5
Dcakd	0.00197144	0.119678	0.381	0.282	1	Two-sided Wilcoxon test	0.25	5
Prpf8	0.00197927	0.13022	0.471	0.361	1	Two-sided Wilcoxon test	0.25	5
Mbd5	0.00198277	-0.253152	0.778	0.83	1	Two-sided Wilcoxon test	0.25	5
Tm4sf1	0.00199387	-0.073966	0.024	0.065	1	Two-sided Wilcoxon test	0.25	5
Snhg18	0.00201342	0.0554696	0.154	0.082	1	Two-sided Wilcoxon test	0.25	5
Snhg3	0.0020264	0.134812	0.394	0.299	1	Two-sided Wilcoxon test	0.25	5
Setbp1	0.0020476	-0.316079	0.839	0.889	1	Two-sided Wilcoxon test	0.25	5
Eef2k	0.00205259	-0.125357	0.13	0.199	1	Two-sided Wilcoxon test	0.25	5
Ciao2b	0.00205705	0.181062	0.542	0.463	1	Two-sided Wilcoxon test	0.25	5
Gm10371	0.00207332	-0.0650565	0.086	0.152	1	Two-sided Wilcoxon test	0.25	5
Fbxo21	0.00208125	0.176062	0.38	0.284	1	Two-sided Wilcoxon test	0.25	5
Olfm1	0.00208469	0.0533003	0.097	0.041	1	Two-sided Wilcoxon test	0.25	5
Tspan31	0.00210213	0.0781225	0.299	0.205	1	Two-sided Wilcoxon test	0.25	5
Hmgn1	0.00212799	0.236055	0.781	0.771	1	Two-sided Wilcoxon test	0.25	5
Kdm2a	0.00213861	-0.138128	0.619	0.68	1	Two-sided Wilcoxon test	0.25	5
Unc5d	0.002152	0.182361	0.094	0.038	1	Two-sided Wilcoxon test	0.25	5
Gm16299	0.00215588	-0.105881	0.032	0.076	1	Two-sided Wilcoxon test	0.25	5
Rbfox2	0.00216723	-0.201131	0.859	0.883	1	Two-sided Wilcoxon test	0.25	5
Armcx2	0.00217373	0.0812166	0.386	0.287	1	Two-sided Wilcoxon test	0.25	5
Zfp84	0.0021766	0.0401483	0.162	0.091	1	Two-sided Wilcoxon test	0.25	5
Pggt1b	0.00218435	-0.174343	0.37	0.443	1	Two-sided Wilcoxon test	0.25	5
Gm26881	0.0021969	0.0468125	0.05	0.012	1	Two-sided Wilcoxon test	0.25	5
Dennd1b	0.0021969	-0.239359	0.606	0.669	1	Two-sided Wilcoxon test	0.25	5
Hs3st3b1	0.00220992	0.0465302	0.093	0.038	1	Two-sided Wilcoxon test	0.25	5
Gpx1	0.00221579	0.227487	0.578	0.507	1	Two-sided Wilcoxon test	0.25	5
A230057D06Rik	0.00222354	0.166972	0.208	0.126	1	Two-sided Wilcoxon test	0.25	5
Tusc2	0.00224125	0.103033	0.206	0.129	1	Two-sided Wilcoxon test	0.25	5
4933421D24Rik	0.00224821	-0.0504933	0.024	0.065	1	Two-sided Wilcoxon test	0.25	5
Pkp2	0.00225733	-0.246168	0.705	0.742	1	Two-sided Wilcoxon test	0.25	5
1700048O20Rik	0.00227672	0.0397719	0.07	0.023	1	Two-sided Wilcoxon test	0.25	5
Srgap3	0.00229438	0.0742709	0.109	0.05	1	Two-sided Wilcoxon test	0.25	5
Asxl2	0.00229683	-0.279065	0.61	0.674	1	Two-sided Wilcoxon test	0.25	5
Fos	0.00230819	0.0304807	0.391	0.276	1	Two-sided Wilcoxon test	0.25	5
Pcf11	0.00231166	-0.238611	0.396	0.466	1	Two-sided Wilcoxon test	0.25	5
Brip1os	0.00232087	-0.193919	0.443	0.507	1	Two-sided Wilcoxon test	0.25	5
Arpc3	0.00235491	0.130684	0.56	0.449	1	Two-sided Wilcoxon test	0.25	5
Mta1	0.00236406	0.0857602	0.33	0.238	1	Two-sided Wilcoxon test	0.25	5
mt-Atp8	0.00237898	0.303893	0.893	0.812	1	Two-sided Wilcoxon test	0.25	5
Cntfr	0.00238931	0.0264683	0.138	0.07	1	Two-sided Wilcoxon test	0.25	5
Btbd1	0.00239209	-0.152121	0.591	0.642	1	Two-sided Wilcoxon test	0.25	5
Kif21a	0.00239248	-0.256667	0.372	0.434	1	Two-sided Wilcoxon test	0.25	5
Rttn	0.00240724	-0.267879	0.365	0.428	1	Two-sided Wilcoxon test	0.25	5
Ndufb9	0.00240743	0.21712	0.752	0.695	1	Two-sided Wilcoxon test	0.25	5
Cox6a1	0.00243172	0.195318	0.614	0.563	1	Two-sided Wilcoxon test	0.25	5
Dhrs4	0.00243508	0.108256	0.302	0.214	1	Two-sided Wilcoxon test	0.25	5
Prim2	0.00245262	-0.263297	0.347	0.419	1	Two-sided Wilcoxon test	0.25	5
Fars2	0.00245498	-0.233353	0.64	0.689	1	Two-sided Wilcoxon test	0.25	5
Ralgps2	0.00245663	-0.162136	0.498	0.587	1	Two-sided Wilcoxon test	0.25	5
Tvp23a	0.00245991	0.0413433	0.06	0.018	1	Two-sided Wilcoxon test	0.25	5
Kars	0.00246843	0.143752	0.339	0.246	1	Two-sided Wilcoxon test	0.25	5
Ppp1r11	0.00247011	0.129205	0.347	0.255	1	Two-sided Wilcoxon test	0.25	5
Pcbp4	0.00247806	0.160667	0.492	0.39	1	Two-sided Wilcoxon test	0.25	5
Asap1	0.00247927	-0.219306	0.808	0.853	1	Two-sided Wilcoxon test	0.25	5
Usp9x	0.00248667	-0.173181	0.828	0.871	1	Two-sided Wilcoxon test	0.25	5
Maged2	0.00251005	0.252291	0.682	0.622	1	Two-sided Wilcoxon test	0.25	5
Insr	0.00251854	-0.167156	0.599	0.654	1	Two-sided Wilcoxon test	0.25	5
Adprh	0.00252649	0.191095	0.513	0.425	1	Two-sided Wilcoxon test	0.25	5
Hspa12b	0.00252838	0.0753833	0.091	0.038	1	Two-sided Wilcoxon test	0.25	5
Gm26632	0.00253554	-0.282671	0.75	0.757	1	Two-sided Wilcoxon test	0.25	5
Tsc22d2	0.00254094	-0.246462	0.677	0.739	1	Two-sided Wilcoxon test	0.25	5
Mgat4b	0.00255165	0.0934665	0.209	0.129	1	Two-sided Wilcoxon test	0.25	5
Mras	0.00255274	-0.00182632	0.101	0.044	1	Two-sided Wilcoxon test	0.25	5
Kmt2a	0.00255922	-0.149119	0.545	0.636	1	Two-sided Wilcoxon test	0.25	5
Msrb1	0.00256089	0.070168	0.24	0.155	1	Two-sided Wilcoxon test	0.25	5
Ywhab	0.00256131	0.201976	0.628	0.587	1	Two-sided Wilcoxon test	0.25	5
Cdc73	0.00256315	-0.22335	0.599	0.648	1	Two-sided Wilcoxon test	0.25	5
Lacc1	0.00257186	-0.0772728	0.106	0.17	1	Two-sided Wilcoxon test	0.25	5
Tmem132c	0.00257551	0.121669	0.269	0.179	1	Two-sided Wilcoxon test	0.25	5
Dchs1	0.00258716	0.0363862	0.13	0.065	1	Two-sided Wilcoxon test	0.25	5
Oga	0.00261012	-0.204896	0.619	0.677	1	Two-sided Wilcoxon test	0.25	5
Srsf4	0.00262483	-0.172823	0.482	0.56	1	Two-sided Wilcoxon test	0.25	5
Adamts10	0.00263768	0.0372585	0.183	0.106	1	Two-sided Wilcoxon test	0.25	5
Cd24a	0.00263918	0.156198	0.373	0.279	1	Two-sided Wilcoxon test	0.25	5
Gm28501	0.00264607	-0.101613	0.084	0.147	1	Two-sided Wilcoxon test	0.25	5
Uhrf1bp1l	0.00264773	-0.275909	0.416	0.478	1	Two-sided Wilcoxon test	0.25	5
Ttyh3	0.00266323	0.10944	0.331	0.238	1	Two-sided Wilcoxon test	0.25	5
Exoc6b	0.00266676	-0.248622	0.62	0.695	1	Two-sided Wilcoxon test	0.25	5
Pawr	0.00267046	-0.20645	0.492	0.56	1	Two-sided Wilcoxon test	0.25	5
Impa2	0.00269319	-0.191258	0.328	0.405	1	Two-sided Wilcoxon test	0.25	5
Tmem223	0.00269955	0.135917	0.461	0.364	1	Two-sided Wilcoxon test	0.25	5
Ak3	0.0027022	0.122994	0.326	0.235	1	Two-sided Wilcoxon test	0.25	5
Tmem245	0.00270372	-0.230237	0.607	0.68	1	Two-sided Wilcoxon test	0.25	5
Ttc14	0.00271277	-0.195078	0.446	0.522	1	Two-sided Wilcoxon test	0.25	5
Rbm5	0.00271577	-0.124409	0.519	0.601	1	Two-sided Wilcoxon test	0.25	5
Ergic3	0.00271718	0.131236	0.451	0.349	1	Two-sided Wilcoxon test	0.25	5
Gm16070	0.00272747	0.0174715	0.065	0.021	1	Two-sided Wilcoxon test	0.25	5
Capn1	0.00274521	0.050137	0.089	0.038	1	Two-sided Wilcoxon test	0.25	5
Elp5	0.00274601	0.0855044	0.313	0.217	1	Two-sided Wilcoxon test	0.25	5
Camk1d	0.00274943	-0.118921	0.878	0.88	1	Two-sided Wilcoxon test	0.25	5
Bmp1	0.00275996	-0.0375974	0.161	0.085	1	Two-sided Wilcoxon test	0.25	5
mt-Co1	0.00276249	0.179697	0.997	1	1	Two-sided Wilcoxon test	0.25	5
Rrnad1	0.00277756	0.0465781	0.172	0.097	1	Two-sided Wilcoxon test	0.25	5
Tes	0.00277873	0.0156638	0.157	0.085	1	Two-sided Wilcoxon test	0.25	5
Pdap1	0.00278544	0.18273	0.656	0.598	1	Two-sided Wilcoxon test	0.25	5
Ppp3ca	0.00279674	-0.253364	0.774	0.839	1	Two-sided Wilcoxon test	0.25	5
Sparc	0.00280606	0.228221	0.778	0.736	1	Two-sided Wilcoxon test	0.25	5
Hs2st1	0.00281717	-0.148438	0.532	0.584	1	Two-sided Wilcoxon test	0.25	5
Larp4b	0.0028176	-0.140682	0.651	0.716	1	Two-sided Wilcoxon test	0.25	5
Dzip1l	0.00282373	-0.118415	0.252	0.334	1	Two-sided Wilcoxon test	0.25	5
Pcdh18	0.00282431	0.0677258	0.138	0.073	1	Two-sided Wilcoxon test	0.25	5
Usp25	0.00283495	-0.286288	0.568	0.622	1	Two-sided Wilcoxon test	0.25	5
Pgpep1	0.00285378	0.0660757	0.172	0.1	1	Two-sided Wilcoxon test	0.25	5
Ryr2	0.00288192	-0.216404	0.995	0.977	1	Two-sided Wilcoxon test	0.25	5
Iws1	0.00288961	-0.203433	0.519	0.589	1	Two-sided Wilcoxon test	0.25	5
Brdt	0.00289046	0.0270711	0.073	0.026	1	Two-sided Wilcoxon test	0.25	5
Scamp3	0.00289445	0.113196	0.269	0.185	1	Two-sided Wilcoxon test	0.25	5
Dach2	0.00291235	0.0781156	0.099	0.044	1	Two-sided Wilcoxon test	0.25	5
Osbp	0.00291926	0.0955461	0.404	0.299	1	Two-sided Wilcoxon test	0.25	5
Ino80b	0.0029229	0.0407896	0.17	0.097	1	Two-sided Wilcoxon test	0.25	5
Ift20	0.0029321	0.113373	0.417	0.311	1	Two-sided Wilcoxon test	0.25	5
Nlgn1	0.00294369	0.158798	0.068	0.023	1	Two-sided Wilcoxon test	0.25	5
Hnrnph2	0.0029652	0.142915	0.471	0.378	1	Two-sided Wilcoxon test	0.25	5
Scmh1	0.00299374	-0.247932	0.739	0.786	1	Two-sided Wilcoxon test	0.25	5
Crebbp	0.00300819	-0.194558	0.726	0.801	1	Two-sided Wilcoxon test	0.25	5
Smdt1	0.00301373	0.232018	0.628	0.61	1	Two-sided Wilcoxon test	0.25	5
Sh3bgr	0.00302107	0.302694	0.768	0.757	1	Two-sided Wilcoxon test	0.25	5
Zfp808	0.00302511	0.0730251	0.19	0.114	1	Two-sided Wilcoxon test	0.25	5
Cnot1	0.00303076	-0.19509	0.787	0.801	1	Two-sided Wilcoxon test	0.25	5
Card19	0.00303415	0.139135	0.32	0.232	1	Two-sided Wilcoxon test	0.25	5
mt-Co3	0.00304813	0.22184	0.998	1	1	Two-sided Wilcoxon test	0.25	5
Gpatch8	0.00307845	-0.220728	0.674	0.718	1	Two-sided Wilcoxon test	0.25	5
Gm49085	0.00309552	-0.0623403	0.039	0.085	1	Two-sided Wilcoxon test	0.25	5
Zdhhc17	0.00310672	-0.176151	0.313	0.393	1	Two-sided Wilcoxon test	0.25	5
Plekha5	0.00313357	-0.293478	0.545	0.628	1	Two-sided Wilcoxon test	0.25	5
Tpr	0.00317722	-0.196454	0.807	0.815	1	Two-sided Wilcoxon test	0.25	5
Epop	0.00319603	0.0475765	0.068	0.023	1	Two-sided Wilcoxon test	0.25	5
Prom1	0.00319674	0.0126461	0.12	0.059	1	Two-sided Wilcoxon test	0.25	5
Bpgm	0.00320131	0.185993	0.261	0.185	1	Two-sided Wilcoxon test	0.25	5
Polr2g	0.00321092	0.153849	0.477	0.381	1	Two-sided Wilcoxon test	0.25	5
Sec63	0.00323232	-0.204837	0.597	0.648	1	Two-sided Wilcoxon test	0.25	5
Angptl3	0.00323587	-0.0802507	0.034	0.076	1	Two-sided Wilcoxon test	0.25	5
Endog	0.00324986	0.0803343	0.245	0.161	1	Two-sided Wilcoxon test	0.25	5
Mrpl11	0.00325983	0.197759	0.497	0.413	1	Two-sided Wilcoxon test	0.25	5
Far1os	0.00326108	-0.103907	0.154	0.229	1	Two-sided Wilcoxon test	0.25	5
Ptms	0.00326306	0.210025	0.593	0.516	1	Two-sided Wilcoxon test	0.25	5
Ptrhd1	0.00328634	0.0552794	0.206	0.129	1	Two-sided Wilcoxon test	0.25	5
Mylpf	0.00329263	0.121951	0.211	0.135	1	Two-sided Wilcoxon test	0.25	5
Auts2	0.00329752	-0.369375	0.935	0.962	1	Two-sided Wilcoxon test	0.25	5
Pin1	0.00330134	0.153238	0.547	0.463	1	Two-sided Wilcoxon test	0.25	5
Fam135a	0.0033121	-0.208854	0.5	0.557	1	Two-sided Wilcoxon test	0.25	5
Tomm22	0.0033138	0.210003	0.584	0.522	1	Two-sided Wilcoxon test	0.25	5
Actg1	0.00336486	0.253802	0.937	0.944	1	Two-sided Wilcoxon test	0.25	5
Sp3os	0.00337112	0.0672253	0.175	0.106	1	Two-sided Wilcoxon test	0.25	5
Pgap3	0.00337828	0.067314	0.133	0.07	1	Two-sided Wilcoxon test	0.25	5
Prkaa2	0.00339539	-0.205789	0.687	0.754	1	Two-sided Wilcoxon test	0.25	5
Gm26672	0.00340217	-0.163668	0.11	0.173	1	Two-sided Wilcoxon test	0.25	5
Cstb	0.00340268	0.111934	0.328	0.238	1	Two-sided Wilcoxon test	0.25	5
Rarg	0.00340333	0.0387315	0.054	0.015	1	Two-sided Wilcoxon test	0.25	5
Cacybp	0.00342185	0.179931	0.619	0.543	1	Two-sided Wilcoxon test	0.25	5
Ppp4r3a	0.00344862	-0.202758	0.63	0.683	1	Two-sided Wilcoxon test	0.25	5
Zfhx4	0.00347505	0.182032	0.239	0.158	1	Two-sided Wilcoxon test	0.25	5
Rprd2	0.00348814	-0.149253	0.482	0.56	1	Two-sided Wilcoxon test	0.25	5
Zfand3	0.0034905	-0.230468	0.836	0.883	1	Two-sided Wilcoxon test	0.25	5
Tln2	0.00349623	-0.261032	0.768	0.792	1	Two-sided Wilcoxon test	0.25	5
Hint3	0.00349696	0.0325877	0.247	0.158	1	Two-sided Wilcoxon test	0.25	5
Zeb2	0.00349884	-0.193373	0.594	0.657	1	Two-sided Wilcoxon test	0.25	5
Gm17590	0.00349937	-0.0525732	0.026	0.065	1	Two-sided Wilcoxon test	0.25	5
Ythdf3	0.00350304	-0.193916	0.661	0.692	1	Two-sided Wilcoxon test	0.25	5
S100a1	0.00350393	0.0574173	0.279	0.188	1	Two-sided Wilcoxon test	0.25	5
Kcna4	0.00350733	-0.093735	0.067	0.12	1	Two-sided Wilcoxon test	0.25	5
Nrg2	0.00350902	-0.260773	0.222	0.299	1	Two-sided Wilcoxon test	0.25	5
Msl3	0.00352228	0.106851	0.286	0.202	1	Two-sided Wilcoxon test	0.25	5
Hmgcll1	0.00352465	0.0772195	0.094	0.041	1	Two-sided Wilcoxon test	0.25	5
Ube2g1	0.00361191	-0.18817	0.687	0.739	1	Two-sided Wilcoxon test	0.25	5
Slc24a3	0.00361261	0.332426	0.36	0.261	1	Two-sided Wilcoxon test	0.25	5
Gm48383	0.00361466	-0.129999	0.073	0.129	1	Two-sided Wilcoxon test	0.25	5
Rcan2	0.00363661	-0.222864	0.513	0.595	1	Two-sided Wilcoxon test	0.25	5
Morc2a	0.00365196	-0.17405	0.346	0.422	1	Two-sided Wilcoxon test	0.25	5
Gjc1	0.00366924	-0.186979	0.562	0.607	1	Two-sided Wilcoxon test	0.25	5
Gipr	0.00368779	-0.187472	0.127	0.191	1	Two-sided Wilcoxon test	0.25	5
Cntln	0.00370415	-0.213284	0.369	0.434	1	Two-sided Wilcoxon test	0.25	5
Apoa2	0.00370828	0.106985	0.091	0.041	1	Two-sided Wilcoxon test	0.25	5
Fxr1	0.00371015	-0.144035	0.839	0.891	1	Two-sided Wilcoxon test	0.25	5
Igf2	0.00372757	-0.27344	0.821	0.924	1	Two-sided Wilcoxon test	0.25	5
Mad2l2	0.00373182	0.0351348	0.109	0.053	1	Two-sided Wilcoxon test	0.25	5
Arhgef39	0.00374742	0.0372747	0.076	0.029	1	Two-sided Wilcoxon test	0.25	5
Cat	0.00376667	0.109298	0.302	0.214	1	Two-sided Wilcoxon test	0.25	5
Ofd1	0.0037672	0.0830568	0.209	0.132	1	Two-sided Wilcoxon test	0.25	5
Tent5d	0.00380631	-0.12316	0.104	0.164	1	Two-sided Wilcoxon test	0.25	5
Wdr17	0.00381616	-0.22909	0.058	0.109	1	Two-sided Wilcoxon test	0.25	5
Eef1g	0.00384883	0.181529	0.857	0.824	1	Two-sided Wilcoxon test	0.25	5
Dph3	0.00386589	0.0939504	0.391	0.299	1	Two-sided Wilcoxon test	0.25	5
Prdx5	0.00387459	0.112028	0.518	0.405	1	Two-sided Wilcoxon test	0.25	5
Ppp2r3a	0.00390022	-0.211112	0.839	0.853	1	Two-sided Wilcoxon test	0.25	5
Txn2	0.00391039	0.140086	0.469	0.384	1	Two-sided Wilcoxon test	0.25	5
Smc3	0.00392465	-0.200101	0.643	0.698	1	Two-sided Wilcoxon test	0.25	5
Gm28529	0.00392544	-0.0594097	0.023	0.059	1	Two-sided Wilcoxon test	0.25	5
Mrpl36	0.00394139	0.115561	0.37	0.279	1	Two-sided Wilcoxon test	0.25	5
Mfap4	0.00395288	0.098072	0.148	0.085	1	Two-sided Wilcoxon test	0.25	5
Cul3	0.00396673	-0.190992	0.654	0.73	1	Two-sided Wilcoxon test	0.25	5
Yap1	0.00399928	-0.168783	0.583	0.648	1	Two-sided Wilcoxon test	0.25	5
Grhl1	0.00402779	-0.223003	0.208	0.282	1	Two-sided Wilcoxon test	0.25	5
Mab21l2	0.00403024	0.131684	0.114	0.059	1	Two-sided Wilcoxon test	0.25	5
Kpna1	0.00403552	-0.238734	0.597	0.663	1	Two-sided Wilcoxon test	0.25	5
Pfdn2	0.00404065	0.157015	0.657	0.587	1	Two-sided Wilcoxon test	0.25	5
Ccbe1	0.0040551	0.110166	0.096	0.044	1	Two-sided Wilcoxon test	0.25	5
Nudt16l1	0.00408932	0.120721	0.273	0.194	1	Two-sided Wilcoxon test	0.25	5
Ppp1r14b	0.00410392	0.205684	0.782	0.795	1	Two-sided Wilcoxon test	0.25	5
Sfrp2	0.00410483	0.0342618	0.071	0.026	1	Two-sided Wilcoxon test	0.25	5
Marc2	0.0041145	0.0807178	0.315	0.22	1	Two-sided Wilcoxon test	0.25	5
Daam1	0.00412237	-0.167984	0.797	0.859	1	Two-sided Wilcoxon test	0.25	5
Rbm26	0.0041259	-0.177063	0.698	0.754	1	Two-sided Wilcoxon test	0.25	5
Gm16536	0.00414188	0.0594611	0.083	0.035	1	Two-sided Wilcoxon test	0.25	5
Cul1	0.00414911	-0.186658	0.708	0.754	1	Two-sided Wilcoxon test	0.25	5
Akr1b3	0.00416534	0.117269	0.433	0.331	1	Two-sided Wilcoxon test	0.25	5
Scaf8	0.00416595	-0.211287	0.68	0.713	1	Two-sided Wilcoxon test	0.25	5
Dynlt3	0.00416683	0.0727516	0.315	0.217	1	Two-sided Wilcoxon test	0.25	5
Trabd2b	0.00417073	0.128505	0.26	0.173	1	Two-sided Wilcoxon test	0.25	5
5430427M07Rik	0.00420586	-0.0459898	0.021	0.056	1	Two-sided Wilcoxon test	0.25	5
Kmt2c	0.00420864	-0.254723	0.807	0.85	1	Two-sided Wilcoxon test	0.25	5
Ddhd2	0.0042108	-0.192215	0.312	0.387	1	Two-sided Wilcoxon test	0.25	5
Rab5c	0.00421767	0.0815691	0.291	0.199	1	Two-sided Wilcoxon test	0.25	5
Ndufab1	0.00422994	0.173878	0.792	0.724	1	Two-sided Wilcoxon test	0.25	5
Hemgn	0.00423109	0.13985	0.107	0.053	1	Two-sided Wilcoxon test	0.25	5
BC005561	0.00424814	-0.204986	0.411	0.481	1	Two-sided Wilcoxon test	0.25	5
Inka1	0.00427116	0.0310519	0.08	0.032	1	Two-sided Wilcoxon test	0.25	5
Pja1	0.00428606	0.0705461	0.313	0.22	1	Two-sided Wilcoxon test	0.25	5
Cpsf6	0.00428854	-0.205284	0.719	0.777	1	Two-sided Wilcoxon test	0.25	5
Dnajc8	0.00429714	0.165929	0.622	0.545	1	Two-sided Wilcoxon test	0.25	5
1810055G02Rik	0.00430804	0.0387635	0.141	0.079	1	Two-sided Wilcoxon test	0.25	5
Adamts6	0.00432834	-0.369117	0.705	0.727	1	Two-sided Wilcoxon test	0.25	5
Med12l	0.00433933	-0.166726	0.581	0.686	1	Two-sided Wilcoxon test	0.25	5
Msi2	0.00434652	-0.22826	0.946	0.974	1	Two-sided Wilcoxon test	0.25	5
Rbis	0.00436456	0.0976666	0.455	0.358	1	Two-sided Wilcoxon test	0.25	5
Rpl9	0.00438139	0.188371	0.909	0.915	1	Two-sided Wilcoxon test	0.25	5
Mdk	0.00441837	0.32731	0.773	0.739	1	Two-sided Wilcoxon test	0.25	5
Mpped2	0.00445927	-0.337734	0.782	0.83	1	Two-sided Wilcoxon test	0.25	5
Cav1	0.00446226	0.103677	0.115	0.059	1	Two-sided Wilcoxon test	0.25	5
Tbrg1	0.00446928	0.155096	0.534	0.457	1	Two-sided Wilcoxon test	0.25	5
Ppih	0.00447776	0.0618864	0.328	0.232	1	Two-sided Wilcoxon test	0.25	5
Gm48099	0.00448096	-0.132149	0.14	0.205	1	Two-sided Wilcoxon test	0.25	5
Hdgf	0.0044876	0.19421	0.62	0.551	1	Two-sided Wilcoxon test	0.25	5
Prox1	0.0045004	-0.221345	0.461	0.519	1	Two-sided Wilcoxon test	0.25	5
Cby1	0.00450124	0.0656671	0.255	0.17	1	Two-sided Wilcoxon test	0.25	5
Mmp14	0.00451927	0.0624462	0.248	0.164	1	Two-sided Wilcoxon test	0.25	5
Tprgl	0.00453521	0.126412	0.313	0.232	1	Two-sided Wilcoxon test	0.25	5
Vwa8	0.00455129	-0.258234	0.427	0.487	1	Two-sided Wilcoxon test	0.25	5
Thrap3	0.00455409	-0.149252	0.763	0.801	1	Two-sided Wilcoxon test	0.25	5
Kctd18	0.00459436	-0.180091	0.166	0.229	1	Two-sided Wilcoxon test	0.25	5
Vps26b	0.00459578	0.0708418	0.17	0.103	1	Two-sided Wilcoxon test	0.25	5
Ndufa8	0.00461194	0.167232	0.672	0.604	1	Two-sided Wilcoxon test	0.25	5
Trim28	0.00461777	0.121167	0.627	0.56	1	Two-sided Wilcoxon test	0.25	5
Gm48708	0.00465569	-0.0616153	0.049	0.097	1	Two-sided Wilcoxon test	0.25	5
Pgk1	0.00468212	-0.242704	0.839	0.871	1	Two-sided Wilcoxon test	0.25	5
Ptpn4	0.00468667	-0.231952	0.631	0.689	1	Two-sided Wilcoxon test	0.25	5
Cdh11	0.00469109	0.210547	0.321	0.243	1	Two-sided Wilcoxon test	0.25	5
Sulf1	0.00471168	0.176951	0.224	0.15	1	Two-sided Wilcoxon test	0.25	5
Tbc1d30	0.00472395	-0.108237	0.112	0.173	1	Two-sided Wilcoxon test	0.25	5
Prrc2c	0.00472668	-0.153025	0.828	0.894	1	Two-sided Wilcoxon test	0.25	5
Lrrtm4	0.00473022	-0.37855	0.099	0.161	1	Two-sided Wilcoxon test	0.25	5
Srbd1	0.00474892	-0.21101	0.411	0.469	1	Two-sided Wilcoxon test	0.25	5
Ttk	0.00475123	0.0452427	0.218	0.135	1	Two-sided Wilcoxon test	0.25	5
Psmd4	0.00476674	0.195537	0.594	0.537	1	Two-sided Wilcoxon test	0.25	5
Ppia	0.00476974	0.170071	0.989	0.988	1	Two-sided Wilcoxon test	0.25	5
Eif1b	0.00477283	0.143101	0.597	0.525	1	Two-sided Wilcoxon test	0.25	5
Tshz3	0.00480808	0.0984273	0.179	0.109	1	Two-sided Wilcoxon test	0.25	5
Cadm2	0.00481434	0.118425	0.091	0.041	1	Two-sided Wilcoxon test	0.25	5
Yeats2	0.00481673	-0.181028	0.531	0.601	1	Two-sided Wilcoxon test	0.25	5
Tab2	0.00484871	-0.190433	0.578	0.648	1	Two-sided Wilcoxon test	0.25	5
Exoc5	0.00486075	-0.20885	0.539	0.601	1	Two-sided Wilcoxon test	0.25	5
Stk3	0.00486141	-0.204885	0.693	0.727	1	Two-sided Wilcoxon test	0.25	5
Pcx	0.00486841	0.0840882	0.14	0.079	1	Two-sided Wilcoxon test	0.25	5
Gm11655	0.00489436	-0.0366349	0.019	0.053	1	Two-sided Wilcoxon test	0.25	5
Smox	0.00491442	0.0172679	0.112	0.056	1	Two-sided Wilcoxon test	0.25	5
Pomgnt2	0.00491568	0.0399953	0.06	0.021	1	Two-sided Wilcoxon test	0.25	5
Hspa9	0.0049204	-0.169571	0.805	0.83	1	Two-sided Wilcoxon test	0.25	5
Spcs1	0.00492978	0.0982835	0.432	0.326	1	Two-sided Wilcoxon test	0.25	5
Pip5k1bos	0.00501799	-0.0521869	0.018	0.05	1	Two-sided Wilcoxon test	0.25	5
Dcaf8	0.00501859	-0.134417	0.529	0.581	1	Two-sided Wilcoxon test	0.25	5
Gm39214	0.00502243	-0.094758	0.045	0.091	1	Two-sided Wilcoxon test	0.25	5
Pdss1	0.00507252	-0.223608	0.351	0.413	1	Two-sided Wilcoxon test	0.25	5
Ilk	0.00507312	0.148415	0.448	0.352	1	Two-sided Wilcoxon test	0.25	5
Tubb2b	0.00507599	0.154513	0.5	0.422	1	Two-sided Wilcoxon test	0.25	5
Gm6710	0.00508895	0.0311136	0.091	0.041	1	Two-sided Wilcoxon test	0.25	5
Gm38155	0.00509324	-0.0920658	0.029	0.067	1	Two-sided Wilcoxon test	0.25	5
Mrps33	0.00510077	0.141198	0.528	0.449	1	Two-sided Wilcoxon test	0.25	5
Tm9sf1	0.00511283	-0.0972442	0.133	0.196	1	Two-sided Wilcoxon test	0.25	5
Sbf2	0.00512938	-0.192483	0.825	0.883	1	Two-sided Wilcoxon test	0.25	5
Ttc1	0.00513293	0.102005	0.318	0.24	1	Two-sided Wilcoxon test	0.25	5
Ncaph2	0.00513786	0.112968	0.354	0.255	1	Two-sided Wilcoxon test	0.25	5
Xpo1	0.00518247	-0.241491	0.722	0.789	1	Two-sided Wilcoxon test	0.25	5
Ostc	0.00520532	0.158052	0.57	0.507	1	Two-sided Wilcoxon test	0.25	5
Lpar1	0.00520962	0.0705333	0.196	0.12	1	Two-sided Wilcoxon test	0.25	5
Haus8	0.00525309	0.0995357	0.364	0.276	1	Two-sided Wilcoxon test	0.25	5
Rpgrip1	0.00526661	0.134682	0.338	0.243	1	Two-sided Wilcoxon test	0.25	5
Gm20647	0.0052728	-0.118497	0.052	0.1	1	Two-sided Wilcoxon test	0.25	5
Ifnar1	0.00527912	0.0900819	0.232	0.155	1	Two-sided Wilcoxon test	0.25	5
Uri1	0.0052852	-0.193985	0.573	0.642	1	Two-sided Wilcoxon test	0.25	5
Ube2e2	0.00528866	-0.231631	0.726	0.777	1	Two-sided Wilcoxon test	0.25	5
Noc3l	0.00529993	0.0455966	0.206	0.129	1	Two-sided Wilcoxon test	0.25	5
Casq1	0.0053005	0.235548	0.406	0.331	1	Two-sided Wilcoxon test	0.25	5
Elk1	0.00531227	0.0613365	0.144	0.082	1	Two-sided Wilcoxon test	0.25	5
Sec11a	0.00532242	0.160598	0.63	0.54	1	Two-sided Wilcoxon test	0.25	5
Mark3	0.00540015	-0.138908	0.619	0.686	1	Two-sided Wilcoxon test	0.25	5
Prr13	0.00540313	0.114354	0.308	0.223	1	Two-sided Wilcoxon test	0.25	5
Nipbl	0.00540517	-0.239516	0.804	0.845	1	Two-sided Wilcoxon test	0.25	5
Med12	0.00541606	0.0605373	0.26	0.176	1	Two-sided Wilcoxon test	0.25	5
Gm16178	0.00544758	-0.0920576	0.034	0.073	1	Two-sided Wilcoxon test	0.25	5
Kcng2	0.00545897	-0.190148	0.589	0.642	1	Two-sided Wilcoxon test	0.25	5
Gm10282	0.00546897	0.0301971	0.055	0.018	1	Two-sided Wilcoxon test	0.25	5
Gon4l	0.00547868	-0.183331	0.515	0.578	1	Two-sided Wilcoxon test	0.25	5
Adam23	0.00548186	0.0496289	0.065	0.023	1	Two-sided Wilcoxon test	0.25	5
Surf1	0.00548584	0.0592464	0.183	0.114	1	Two-sided Wilcoxon test	0.25	5
Ddt	0.00552713	0.0700053	0.276	0.194	1	Two-sided Wilcoxon test	0.25	5
Clns1a	0.00553691	0.108643	0.42	0.323	1	Two-sided Wilcoxon test	0.25	5
A330076H08Rik	0.00553915	0.0783082	0.138	0.076	1	Two-sided Wilcoxon test	0.25	5
Cdkal1	0.00554817	-0.222281	0.747	0.792	1	Two-sided Wilcoxon test	0.25	5
Cryab	0.00556464	0.207515	0.75	0.692	1	Two-sided Wilcoxon test	0.25	5
4930595D18Rik	0.0056078	-0.101455	0.049	0.094	1	Two-sided Wilcoxon test	0.25	5
Dhdds	0.00565235	0.0639967	0.3	0.211	1	Two-sided Wilcoxon test	0.25	5
Ivd	0.0056855	0.0959424	0.334	0.246	1	Two-sided Wilcoxon test	0.25	5
Lsr	0.00571414	0.0353092	0.086	0.038	1	Two-sided Wilcoxon test	0.25	5
4933431K23Rik	0.00572093	-0.149551	0.159	0.226	1	Two-sided Wilcoxon test	0.25	5
Afp	0.00576705	0.11121	0.122	0.065	1	Two-sided Wilcoxon test	0.25	5
Wdr60	0.00576747	0.0385163	0.081	0.035	1	Two-sided Wilcoxon test	0.25	5
Lin7a	0.00578189	0.054866	0.078	0.032	1	Two-sided Wilcoxon test	0.25	5
4833422C13Rik	0.00582344	-0.125804	0.034	0.073	1	Two-sided Wilcoxon test	0.25	5
Ralgapa1	0.00584968	-0.172565	0.726	0.765	1	Two-sided Wilcoxon test	0.25	5
Lpl	0.00586344	0.18512	0.586	0.49	1	Two-sided Wilcoxon test	0.25	5
Eif3g	0.00586703	0.191723	0.56	0.481	1	Two-sided Wilcoxon test	0.25	5
Gpx7	0.00587034	0.0568157	0.19	0.117	1	Two-sided Wilcoxon test	0.25	5
Hopx	0.00591065	0.184542	0.433	0.355	1	Two-sided Wilcoxon test	0.25	5
St6gal1	0.00592189	0.0482214	0.159	0.091	1	Two-sided Wilcoxon test	0.25	5
Slc4a7	0.00593637	-0.160855	0.568	0.628	1	Two-sided Wilcoxon test	0.25	5
Tbx3os1	0.00594478	0.0939936	0.076	0.032	1	Two-sided Wilcoxon test	0.25	5
Ybx1	0.00598112	0.233018	0.883	0.924	1	Two-sided Wilcoxon test	0.25	5
Man2c1os	0.00600842	-0.112941	0.086	0.141	1	Two-sided Wilcoxon test	0.25	5
D6Wsu163e	0.00603064	0.0319433	0.097	0.047	1	Two-sided Wilcoxon test	0.25	5
Cdyl	0.00603885	-0.171469	0.578	0.648	1	Two-sided Wilcoxon test	0.25	5
Clock	0.00605696	-0.155069	0.508	0.575	1	Two-sided Wilcoxon test	0.25	5
Phc2	0.00606803	0.0748924	0.334	0.243	1	Two-sided Wilcoxon test	0.25	5
Sirt6	0.00607952	0.0287764	0.106	0.053	1	Two-sided Wilcoxon test	0.25	5
Ppp1cb	0.00609733	-0.173048	0.797	0.845	1	Two-sided Wilcoxon test	0.25	5
Uhrf2	0.00611609	-0.225857	0.575	0.625	1	Two-sided Wilcoxon test	0.25	5
Crabp2	0.00613023	0.0473413	0.13	0.07	1	Two-sided Wilcoxon test	0.25	5
Chd1	0.00613977	-0.199739	0.557	0.616	1	Two-sided Wilcoxon test	0.25	5
Crebzf	0.00615058	-0.179252	0.287	0.349	1	Two-sided Wilcoxon test	0.25	5
Prmt1	0.00615409	0.176127	0.714	0.677	1	Two-sided Wilcoxon test	0.25	5
Maml2	0.00615891	-0.296741	0.727	0.771	1	Two-sided Wilcoxon test	0.25	5
Arhgef12	0.00617981	-0.188459	0.711	0.768	1	Two-sided Wilcoxon test	0.25	5
Gm26911	0.00619728	-0.109344	0.102	0.161	1	Two-sided Wilcoxon test	0.25	5
Ndufb3	0.00619776	0.0980514	0.508	0.419	1	Two-sided Wilcoxon test	0.25	5
Mrps5	0.00621588	0.0993639	0.502	0.408	1	Two-sided Wilcoxon test	0.25	5
Aco2	0.00621933	0.131771	0.774	0.736	1	Two-sided Wilcoxon test	0.25	5
Zmym4	0.00623926	-0.101306	0.687	0.739	1	Two-sided Wilcoxon test	0.25	5
B4galt7	0.00624243	-0.0662568	0.07	0.12	1	Two-sided Wilcoxon test	0.25	5
Atp5g2	0.00624272	0.170836	0.727	0.701	1	Two-sided Wilcoxon test	0.25	5
Gm12122	0.00624938	0.0339362	0.068	0.026	1	Two-sided Wilcoxon test	0.25	5
Lrrc4b	0.00627114	0.0819219	0.14	0.079	1	Two-sided Wilcoxon test	0.25	5
Csrp3	0.00629931	0.23847	0.849	0.818	1	Two-sided Wilcoxon test	0.25	5
Paqr3	0.00631103	0.0278561	0.102	0.05	1	Two-sided Wilcoxon test	0.25	5
Hist1h2ag	0.00632887	0.0065617	0.05	0.015	1	Two-sided Wilcoxon test	0.25	5
Ap1g1	0.00634919	-0.201947	0.536	0.592	1	Two-sided Wilcoxon test	0.25	5
Pls3	0.00635557	0.11287	0.336	0.252	1	Two-sided Wilcoxon test	0.25	5
Rabac1	0.00635901	0.139889	0.497	0.405	1	Two-sided Wilcoxon test	0.25	5
Mon2	0.00637222	-0.188226	0.481	0.545	1	Two-sided Wilcoxon test	0.25	5
Zfx	0.00637694	-0.220865	0.44	0.507	1	Two-sided Wilcoxon test	0.25	5
Plxna4os3	0.00638184	-0.0681293	0.055	0.103	1	Two-sided Wilcoxon test	0.25	5
Exoc4	0.0063842	-0.187549	0.878	0.894	1	Two-sided Wilcoxon test	0.25	5
Gm15169	0.00638631	-0.0923582	0.075	0.129	1	Two-sided Wilcoxon test	0.25	5
Tmem219	0.00640087	0.046136	0.12	0.065	1	Two-sided Wilcoxon test	0.25	5
Skil	0.00646126	-0.215834	0.36	0.419	1	Two-sided Wilcoxon test	0.25	5
Dusp9	0.00647904	0.0636839	0.123	0.067	1	Two-sided Wilcoxon test	0.25	5
Rest	0.00649762	-0.157308	0.503	0.563	1	Two-sided Wilcoxon test	0.25	5
Nudt14	0.00654752	0.0660066	0.151	0.091	1	Two-sided Wilcoxon test	0.25	5
Srrm2	0.00657552	-0.138423	0.898	0.938	1	Two-sided Wilcoxon test	0.25	5
Vps13b	0.0065876	-0.256096	0.687	0.718	1	Two-sided Wilcoxon test	0.25	5
Hist1h2ak	0.00660465	0.0339188	0.063	0.023	1	Two-sided Wilcoxon test	0.25	5
Usp34	0.00663678	-0.165192	0.87	0.886	1	Two-sided Wilcoxon test	0.25	5
Pard3b	0.00666384	-0.232711	0.76	0.804	1	Two-sided Wilcoxon test	0.25	5
2310009A05Rik	0.00666585	0.0454793	0.188	0.12	1	Two-sided Wilcoxon test	0.25	5
Map3k12	0.00668967	-0.149496	0.148	0.208	1	Two-sided Wilcoxon test	0.25	5
Gpatch1	0.00672369	0.0687161	0.195	0.123	1	Two-sided Wilcoxon test	0.25	5
Nifk	0.00673684	0.0943051	0.336	0.246	1	Two-sided Wilcoxon test	0.25	5
Med13	0.00674525	-0.192264	0.666	0.739	1	Two-sided Wilcoxon test	0.25	5
Tomm5	0.00674613	0.153224	0.516	0.44	1	Two-sided Wilcoxon test	0.25	5
Hist1h4c	0.00676695	0.0976915	0.104	0.053	1	Two-sided Wilcoxon test	0.25	5
Dnmt3a	0.00681109	-0.154365	0.696	0.765	1	Two-sided Wilcoxon test	0.25	5
Igsf9	0.00681579	0.0403628	0.063	0.023	1	Two-sided Wilcoxon test	0.25	5
Mapk7	0.00682064	0.0374137	0.13	0.07	1	Two-sided Wilcoxon test	0.25	5
Aph1b	0.00682286	0.0782446	0.14	0.079	1	Two-sided Wilcoxon test	0.25	5
Mms22l	0.00682518	-0.24431	0.432	0.496	1	Two-sided Wilcoxon test	0.25	5
Homer2	0.00683303	-0.187609	0.688	0.695	1	Two-sided Wilcoxon test	0.25	5
Cox6b2	0.00685262	0.0858788	0.13	0.073	1	Two-sided Wilcoxon test	0.25	5
Gtdc1	0.00685359	-0.27147	0.49	0.545	1	Two-sided Wilcoxon test	0.25	5
Itga9	0.00686428	-0.00876562	0.317	0.223	1	Two-sided Wilcoxon test	0.25	5
Hspa4	0.00695518	-0.182902	0.755	0.768	1	Two-sided Wilcoxon test	0.25	5
Sart3	0.00697083	-0.147552	0.404	0.472	1	Two-sided Wilcoxon test	0.25	5
Stag2	0.00697867	-0.248348	0.729	0.765	1	Two-sided Wilcoxon test	0.25	5
Slc25a1	0.00698755	0.000774376	0.125	0.067	1	Two-sided Wilcoxon test	0.25	5
Tmem50b	0.00701875	0.0278736	0.227	0.147	1	Two-sided Wilcoxon test	0.25	5
Gm29170	0.00703512	0.0380606	0.093	0.044	1	Two-sided Wilcoxon test	0.25	5
Pigyl	0.00707823	0.0411877	0.226	0.147	1	Two-sided Wilcoxon test	0.25	5
Lypla1	0.00709824	0.0756874	0.318	0.232	1	Two-sided Wilcoxon test	0.25	5
Afg1l	0.00711997	-0.214296	0.326	0.393	1	Two-sided Wilcoxon test	0.25	5
Polr2b	0.00712009	0.123804	0.456	0.355	1	Two-sided Wilcoxon test	0.25	5
Polr1d	0.00714801	0.113197	0.609	0.519	1	Two-sided Wilcoxon test	0.25	5
Ebf3	0.00715344	0.173517	0.146	0.088	1	Two-sided Wilcoxon test	0.25	5
Eml5	0.00715746	-0.243186	0.356	0.411	1	Two-sided Wilcoxon test	0.25	5
Exoc3	0.00718594	-0.185127	0.472	0.525	1	Two-sided Wilcoxon test	0.25	5
Mien1	0.00720695	0.0911729	0.312	0.229	1	Two-sided Wilcoxon test	0.25	5
Nfrkb	0.00722368	-0.170449	0.256	0.323	1	Two-sided Wilcoxon test	0.25	5
Aig1	0.00724393	-0.251001	0.489	0.548	1	Two-sided Wilcoxon test	0.25	5
Gm43713	0.00724925	-0.137182	0.164	0.232	1	Two-sided Wilcoxon test	0.25	5
Hnrnpul2	0.00728523	-0.151682	0.458	0.528	1	Two-sided Wilcoxon test	0.25	5
Dnajc7	0.00729115	-0.145129	0.69	0.727	1	Two-sided Wilcoxon test	0.25	5
Igf2bp2	0.00731349	-0.151624	0.714	0.783	1	Two-sided Wilcoxon test	0.25	5
Gsk3b	0.0073334	-0.21753	0.799	0.85	1	Two-sided Wilcoxon test	0.25	5
Mpc2	0.00734176	0.0944939	0.492	0.396	1	Two-sided Wilcoxon test	0.25	5
Naa15	0.00735663	-0.175989	0.638	0.689	1	Two-sided Wilcoxon test	0.25	5
Rab1b	0.0073762	0.111943	0.359	0.267	1	Two-sided Wilcoxon test	0.25	5
Isy1	0.00738022	0.0873889	0.273	0.194	1	Two-sided Wilcoxon test	0.25	5
Aup1	0.00740295	0.0191844	0.213	0.138	1	Two-sided Wilcoxon test	0.25	5
Ppp2r5e	0.00741103	-0.165403	0.521	0.604	1	Two-sided Wilcoxon test	0.25	5
Ppm1m	0.00741847	0.0693712	0.119	0.065	1	Two-sided Wilcoxon test	0.25	5
Cox19	0.00745266	0.0752457	0.299	0.22	1	Two-sided Wilcoxon test	0.25	5
Atrnl1	0.0075021	-0.36497	0.791	0.83	1	Two-sided Wilcoxon test	0.25	5
Wbp1	0.00753068	0.0685088	0.253	0.176	1	Two-sided Wilcoxon test	0.25	5
Ppme1	0.00756289	-0.241514	0.411	0.472	1	Two-sided Wilcoxon test	0.25	5
Ilkap	0.00757106	0.167755	0.489	0.387	1	Two-sided Wilcoxon test	0.25	5
Mrto4	0.00757177	0.133491	0.417	0.323	1	Two-sided Wilcoxon test	0.25	5
Elf2	0.00757811	-0.144631	0.599	0.66	1	Two-sided Wilcoxon test	0.25	5
Cdipt	0.00758276	0.0850091	0.203	0.135	1	Two-sided Wilcoxon test	0.25	5
Fam173a	0.00760217	0.125515	0.317	0.232	1	Two-sided Wilcoxon test	0.25	5
Ptn	0.00761188	0.488999	0.555	0.499	1	Two-sided Wilcoxon test	0.25	5
Zfp9	0.00762326	0.0491072	0.153	0.091	1	Two-sided Wilcoxon test	0.25	5
Zcchc3	0.00762518	0.154432	0.388	0.308	1	Two-sided Wilcoxon test	0.25	5
Gm47460	0.00766503	-0.0938771	0.031	0.067	1	Two-sided Wilcoxon test	0.25	5
Cldn34c1	0.00769184	0.0419726	0.084	0.038	1	Two-sided Wilcoxon test	0.25	5
Tubb2a	0.00770712	0.0256736	0.208	0.135	1	Two-sided Wilcoxon test	0.25	5
Tecrl	0.00771251	-0.249016	0.607	0.648	1	Two-sided Wilcoxon test	0.25	5
Hey2	0.00772935	-0.135079	0.221	0.29	1	Two-sided Wilcoxon test	0.25	5
Mea1	0.00777903	0.084493	0.323	0.232	1	Two-sided Wilcoxon test	0.25	5
Mical3	0.00781097	-0.125372	0.781	0.821	1	Two-sided Wilcoxon test	0.25	5
Car14	0.00781948	0.0542941	0.226	0.147	1	Two-sided Wilcoxon test	0.25	5
Spata5	0.00785052	-0.288186	0.532	0.575	1	Two-sided Wilcoxon test	0.25	5
Abca4	0.0078769	-0.120973	0.096	0.15	1	Two-sided Wilcoxon test	0.25	5
Cdk12	0.00788101	-0.21741	0.633	0.689	1	Two-sided Wilcoxon test	0.25	5
Bcl7a	0.00790227	0.0664174	0.304	0.217	1	Two-sided Wilcoxon test	0.25	5
Rictor	0.00792461	-0.194779	0.61	0.68	1	Two-sided Wilcoxon test	0.25	5
Urod	0.00792728	0.130134	0.287	0.208	1	Two-sided Wilcoxon test	0.25	5
Scube3	0.00797757	0.00989745	0.058	0.021	1	Two-sided Wilcoxon test	0.25	5
Col3a1	0.0079785	0.284714	0.308	0.235	1	Two-sided Wilcoxon test	0.25	5
Sema6d	0.00801246	-0.366782	0.588	0.645	1	Two-sided Wilcoxon test	0.25	5
Rps3a1	0.00804749	0.180248	0.963	0.977	1	Two-sided Wilcoxon test	0.25	5
Srcap	0.00808174	-0.202531	0.463	0.516	1	Two-sided Wilcoxon test	0.25	5
Nck2	0.00808376	-0.192446	0.411	0.478	1	Two-sided Wilcoxon test	0.25	5
Cacna1h	0.00812828	-0.251175	0.321	0.381	1	Two-sided Wilcoxon test	0.25	5
Fam171b	0.00813859	0.0325067	0.083	0.038	1	Two-sided Wilcoxon test	0.25	5
Acta1	0.00814054	0.556292	0.552	0.49	1	Two-sided Wilcoxon test	0.25	5
Bloc1s5	0.00816518	0.0312416	0.167	0.103	1	Two-sided Wilcoxon test	0.25	5
Rc3h1	0.0081819	-0.167829	0.545	0.616	1	Two-sided Wilcoxon test	0.25	5
Abcf3	0.00818195	0.0798631	0.231	0.155	1	Two-sided Wilcoxon test	0.25	5
Khdrbs2	0.00819578	0.024295	0.071	0.029	1	Two-sided Wilcoxon test	0.25	5
Vasn	0.00823704	0.0327773	0.128	0.073	1	Two-sided Wilcoxon test	0.25	5
Pp2d1	0.00824407	-0.158137	0.07	0.117	1	Two-sided Wilcoxon test	0.25	5
Gm48742	0.00828659	-0.189588	0.141	0.199	1	Two-sided Wilcoxon test	0.25	5
Mybpc3	0.00829666	-0.154408	0.865	0.889	1	Two-sided Wilcoxon test	0.25	5
Ecpas	0.00832791	-0.237686	0.737	0.765	1	Two-sided Wilcoxon test	0.25	5
E030030I06Rik	0.00837757	0.0544719	0.107	0.056	1	Two-sided Wilcoxon test	0.25	5
Cdk2ap2	0.00839464	0.0794673	0.294	0.211	1	Two-sided Wilcoxon test	0.25	5
Glrx2	0.00839774	0.12269	0.393	0.311	1	Two-sided Wilcoxon test	0.25	5
Gm15737	0.00840201	-0.0695889	0.037	0.076	1	Two-sided Wilcoxon test	0.25	5
Rpl3	0.00841133	0.155855	0.956	0.965	1	Two-sided Wilcoxon test	0.25	5
Rack1	0.00841146	0.144554	0.898	0.889	1	Two-sided Wilcoxon test	0.25	5
Slx4ip	0.00841212	-0.177912	0.37	0.431	1	Two-sided Wilcoxon test	0.25	5
Ascc3	0.00843906	-0.132992	0.763	0.806	1	Two-sided Wilcoxon test	0.25	5
Akip1	0.00846767	0.0474917	0.11	0.059	1	Two-sided Wilcoxon test	0.25	5
Wdr89	0.00849629	0.0280834	0.193	0.123	1	Two-sided Wilcoxon test	0.25	5
Pcbd2	0.00851569	0.0419279	0.276	0.196	1	Two-sided Wilcoxon test	0.25	5
Thsd4	0.00853829	-0.45697	0.604	0.645	1	Two-sided Wilcoxon test	0.25	5
Gm41555	0.0085406	-0.0862861	0.028	0.062	1	Two-sided Wilcoxon test	0.25	5
Cnn1	0.00854393	0.168975	0.555	0.478	1	Two-sided Wilcoxon test	0.25	5
Ankrd1	0.00854464	0.143094	0.826	0.783	1	Two-sided Wilcoxon test	0.25	5
Pde4d	0.00858292	-0.318251	0.899	0.903	1	Two-sided Wilcoxon test	0.25	5
Krba1	0.00858706	-0.0513411	0.148	0.211	1	Two-sided Wilcoxon test	0.25	5
Itgb8	0.00861807	0.0787825	0.182	0.111	1	Two-sided Wilcoxon test	0.25	5
Psat1	0.00862048	0.0317403	0.151	0.091	1	Two-sided Wilcoxon test	0.25	5
Cnbp	0.0087219	0.166223	0.713	0.674	1	Two-sided Wilcoxon test	0.25	5
Dnajc30	0.00873658	0.0667	0.211	0.138	1	Two-sided Wilcoxon test	0.25	5
Ewsr1	0.00876534	-0.20061	0.698	0.733	1	Two-sided Wilcoxon test	0.25	5
Gabarap	0.00876762	0.162569	0.636	0.601	1	Two-sided Wilcoxon test	0.25	5
Fnta	0.00878224	0.122389	0.42	0.32	1	Two-sided Wilcoxon test	0.25	5
Pfn2	0.00878401	0.110605	0.294	0.211	1	Two-sided Wilcoxon test	0.25	5
Slc4a3	0.00880668	-0.14798	0.156	0.217	1	Two-sided Wilcoxon test	0.25	5
Copg2	0.0088165	-0.158299	0.445	0.501	1	Two-sided Wilcoxon test	0.25	5
Rab13	0.00883077	0.0881837	0.287	0.205	1	Two-sided Wilcoxon test	0.25	5
Atf6b	0.00883288	0.0701813	0.208	0.138	1	Two-sided Wilcoxon test	0.25	5
Hdac8	0.00885237	-0.292628	0.409	0.46	1	Two-sided Wilcoxon test	0.25	5
Mef2c	0.00886725	-0.211942	0.826	0.859	1	Two-sided Wilcoxon test	0.25	5
Ankrd13b	0.00889007	0.02904	0.057	0.021	1	Two-sided Wilcoxon test	0.25	5
Psmb1	0.00889967	0.164184	0.719	0.71	1	Two-sided Wilcoxon test	0.25	5
Mrpl51	0.00890673	0.106664	0.58	0.472	1	Two-sided Wilcoxon test	0.25	5
Snx8	0.00892428	-0.129373	0.183	0.243	1	Two-sided Wilcoxon test	0.25	5
Smc2	0.008928	-0.256035	0.502	0.566	1	Two-sided Wilcoxon test	0.25	5
Srp14	0.00894702	0.198003	0.567	0.496	1	Two-sided Wilcoxon test	0.25	5
Gpr155	0.00896892	0.00108658	0.084	0.038	1	Two-sided Wilcoxon test	0.25	5
Gm15543	0.00898093	0.0501094	0.07	0.029	1	Two-sided Wilcoxon test	0.25	5
Akr1a1	0.00899623	0.142404	0.62	0.548	1	Two-sided Wilcoxon test	0.25	5
Dip2c	0.0090047	-0.191478	0.782	0.83	1	Two-sided Wilcoxon test	0.25	5
Ctdsp1	0.00903182	0.0401266	0.188	0.12	1	Two-sided Wilcoxon test	0.25	5
Slc25a36	0.00903971	-0.151867	0.505	0.554	1	Two-sided Wilcoxon test	0.25	5
Bad	0.00905308	0.0428405	0.271	0.191	1	Two-sided Wilcoxon test	0.25	5
R3hdm4	0.0091076	0.0982708	0.297	0.22	1	Two-sided Wilcoxon test	0.25	5
Reep1	0.00911684	-0.125287	0.446	0.51	1	Two-sided Wilcoxon test	0.25	5
9530077C05Rik	0.00913879	0.0399987	0.052	0.018	1	Two-sided Wilcoxon test	0.25	5
Lamp1	0.00914385	0.173809	0.669	0.607	1	Two-sided Wilcoxon test	0.25	5
Hist1h4a	0.00915044	0.0481309	0.065	0.026	1	Two-sided Wilcoxon test	0.25	5
Sin3b	0.00918968	0.0780948	0.492	0.381	1	Two-sided Wilcoxon test	0.25	5
Eya1	0.00920211	0.00989009	0.13	0.073	1	Two-sided Wilcoxon test	0.25	5
Hmox1	0.00921568	0.0799238	0.135	0.079	1	Two-sided Wilcoxon test	0.25	5
Sf3a1	0.0092562	0.10091	0.386	0.29	1	Two-sided Wilcoxon test	0.25	5
Tubb4a	0.00925992	0.0251807	0.07	0.029	1	Two-sided Wilcoxon test	0.25	5
Mospd3	0.00931364	0.0179656	0.052	0.018	1	Two-sided Wilcoxon test	0.25	5
Zcchc7	0.00931445	-0.179451	0.718	0.754	1	Two-sided Wilcoxon test	0.25	5
Hpcal1	0.00932603	0.0642946	0.188	0.12	1	Two-sided Wilcoxon test	0.25	5
Sars2	0.00935464	0.0312694	0.099	0.05	1	Two-sided Wilcoxon test	0.25	5
Iffo2	0.00936332	0.0883212	0.24	0.164	1	Two-sided Wilcoxon test	0.25	5
Atg10	0.00937405	-0.224201	0.416	0.469	1	Two-sided Wilcoxon test	0.25	5
Zfpl1	0.00946679	0.0593419	0.182	0.117	1	Two-sided Wilcoxon test	0.25	5
Larp1	0.00948088	-0.128708	0.557	0.616	1	Two-sided Wilcoxon test	0.25	5
Glo1	0.00953003	0.106522	0.541	0.463	1	Two-sided Wilcoxon test	0.25	5
Ankrd44	0.00953145	-0.272134	0.393	0.455	1	Two-sided Wilcoxon test	0.25	5
Kif26b	0.00956271	-0.286315	0.833	0.833	1	Two-sided Wilcoxon test	0.25	5
Col27a1	0.00957161	0.0350002	0.107	0.056	1	Two-sided Wilcoxon test	0.25	5
Dock1	0.00960171	-0.244991	0.586	0.66	1	Two-sided Wilcoxon test	0.25	5
C1d	0.00964414	0.101566	0.497	0.416	1	Two-sided Wilcoxon test	0.25	5
Rnf166	0.00966799	0.0293178	0.211	0.141	1	Two-sided Wilcoxon test	0.25	5
Ddx18	0.00976492	0.0486237	0.393	0.299	1	Two-sided Wilcoxon test	0.25	5
Dbn1	0.0097848	0.109552	0.252	0.179	1	Two-sided Wilcoxon test	0.25	5
Gm42941	0.00978549	0.046541	0.161	0.097	1	Two-sided Wilcoxon test	0.25	5
1500009L16Rik	0.0097856	0.0605629	0.193	0.126	1	Two-sided Wilcoxon test	0.25	5
Epn2	0.00978937	-0.140836	0.38	0.434	1	Two-sided Wilcoxon test	0.25	5
Emc10	0.00982784	0.10151	0.451	0.355	1	Two-sided Wilcoxon test	0.25	5
Coprs	0.00984142	0.106083	0.365	0.282	1	Two-sided Wilcoxon test	0.25	5
Bbx	0.00985666	-0.224573	0.758	0.806	1	Two-sided Wilcoxon test	0.25	5
Spint2	0.00989156	0.0553817	0.12	0.067	1	Two-sided Wilcoxon test	0.25	5
Vps4a	0.00989657	0.0659237	0.234	0.158	1	Two-sided Wilcoxon test	0.25	5
Lama4	0.00990736	-0.211163	0.615	0.666	1	Two-sided Wilcoxon test	0.25	5
Rmnd1	0.00991118	-0.179623	0.274	0.34	1	Two-sided Wilcoxon test	0.25	5
Ndufa12	0.00991978	0.187126	0.752	0.727	1	Two-sided Wilcoxon test	0.25	5
Arrb2	0.00992298	0.0302551	0.06	0.023	1	Two-sided Wilcoxon test	0.25	5
Myo18b	0.0099279	-0.167071	0.7	0.733	1	Two-sided Wilcoxon test	0.25	5
Lmod1	0.00995077	0.0625852	0.122	0.067	1	Two-sided Wilcoxon test	0.25	5
Zfp62	0.00995699	-0.15145	0.256	0.323	1	Two-sided Wilcoxon test	0.25	5
Czib	0.00998398	0.0976701	0.273	0.196	1	Two-sided Wilcoxon test	0.25	5
Adamts5	0.010004	0.0563628	0.065	0.026	1	Two-sided Wilcoxon test	0.25	5
Ddit3	0.0101326	0.0542734	0.18	0.114	1	Two-sided Wilcoxon test	0.25	5
Rpe	0.0101386	-0.108269	0.221	0.282	1	Two-sided Wilcoxon test	0.25	5
Nsd2	0.0101435	-0.200958	0.667	0.698	1	Two-sided Wilcoxon test	0.25	5
Sptan1	0.0101549	-0.204134	0.768	0.798	1	Two-sided Wilcoxon test	0.25	5
Smg7	0.0101675	-0.212479	0.552	0.601	1	Two-sided Wilcoxon test	0.25	5
Mrpl35	0.0102058	0.0995405	0.385	0.308	1	Two-sided Wilcoxon test	0.25	5
Abcc9	0.0102529	-0.295489	0.404	0.463	1	Two-sided Wilcoxon test	0.25	5
Pih1d1	0.0102535	0.0590102	0.308	0.22	1	Two-sided Wilcoxon test	0.25	5
Tbc1d5	0.0102562	-0.286569	0.683	0.721	1	Two-sided Wilcoxon test	0.25	5
Rnf128	0.0102585	0.038366	0.19	0.12	1	Two-sided Wilcoxon test	0.25	5
Bcat1	0.0103224	0.0459309	0.222	0.15	1	Two-sided Wilcoxon test	0.25	5
Slco5a1	0.0103335	0.0591955	0.114	0.062	1	Two-sided Wilcoxon test	0.25	5
Cpxm1	0.010342	0.0306971	0.117	0.065	1	Two-sided Wilcoxon test	0.25	5
Rnf38	0.0103539	-0.174705	0.463	0.528	1	Two-sided Wilcoxon test	0.25	5
Rbm33	0.0103573	-0.167199	0.466	0.531	1	Two-sided Wilcoxon test	0.25	5
Bex1	0.0103666	0.193914	0.599	0.54	1	Two-sided Wilcoxon test	0.25	5
Ndnf	0.0104011	0.0732901	0.076	0.035	1	Two-sided Wilcoxon test	0.25	5
Nubp1	0.0104316	0.0604421	0.269	0.191	1	Two-sided Wilcoxon test	0.25	5
Trir	0.010464	0.155252	0.597	0.534	1	Two-sided Wilcoxon test	0.25	5
Fam102a	0.0104852	-0.013733	0.123	0.067	1	Two-sided Wilcoxon test	0.25	5
Dis3l2	0.0104863	-0.229175	0.498	0.548	1	Two-sided Wilcoxon test	0.25	5
Timp1	0.010487	0.0132402	0.136	0.079	1	Two-sided Wilcoxon test	0.25	5
Hltf	0.010493	-0.143475	0.39	0.457	1	Two-sided Wilcoxon test	0.25	5
Vti1a	0.010527	-0.143909	0.591	0.651	1	Two-sided Wilcoxon test	0.25	5
Hgh1	0.0105318	0.0235083	0.06	0.023	1	Two-sided Wilcoxon test	0.25	5
Psmb6	0.0106128	0.134652	0.687	0.648	1	Two-sided Wilcoxon test	0.25	5
Rhobtb3	0.0106358	-0.156989	0.505	0.581	1	Two-sided Wilcoxon test	0.25	5
Epb41l4aos	0.0106738	0.0855181	0.196	0.132	1	Two-sided Wilcoxon test	0.25	5
Slf2	0.0106906	-0.108233	0.485	0.557	1	Two-sided Wilcoxon test	0.25	5
Cbx2	0.0107587	0.0307895	0.128	0.073	1	Two-sided Wilcoxon test	0.25	5
Fzd6	0.0107869	-0.0640379	0.075	0.123	1	Two-sided Wilcoxon test	0.25	5
Pcdh9	0.0108776	0.12157	0.136	0.079	1	Two-sided Wilcoxon test	0.25	5
Cnksr3	0.0108831	0.0892508	0.224	0.152	1	Two-sided Wilcoxon test	0.25	5
Ube2d1	0.0109016	0.0845597	0.326	0.243	1	Two-sided Wilcoxon test	0.25	5
Litaf	0.010909	0.0663794	0.242	0.167	1	Two-sided Wilcoxon test	0.25	5
Shroom4	0.0109617	0.087309	0.244	0.167	1	Two-sided Wilcoxon test	0.25	5
Oard1	0.0109803	0.112738	0.334	0.255	1	Two-sided Wilcoxon test	0.25	5
Smad9	0.0109931	-0.16488	0.12	0.173	1	Two-sided Wilcoxon test	0.25	5
Pld3	0.0109982	0.0499189	0.128	0.073	1	Two-sided Wilcoxon test	0.25	5
Serpinf1	0.0110083	0.0215062	0.107	0.056	1	Two-sided Wilcoxon test	0.25	5
Lrmda	0.0110346	-0.403046	0.516	0.578	1	Two-sided Wilcoxon test	0.25	5
Dkk2	0.0110549	0.0876765	0.068	0.029	1	Two-sided Wilcoxon test	0.25	5
Bod1	0.0110594	0.0930201	0.312	0.235	1	Two-sided Wilcoxon test	0.25	5
Gm4117	0.0110704	-0.102694	0.104	0.158	1	Two-sided Wilcoxon test	0.25	5
Nfatc4	0.0110767	0.0539082	0.084	0.041	1	Two-sided Wilcoxon test	0.25	5
Arhgef17	0.0110992	0.119712	0.341	0.258	1	Two-sided Wilcoxon test	0.25	5
Cinp	0.0111168	0.0433799	0.208	0.135	1	Two-sided Wilcoxon test	0.25	5
St8sia1	0.0111271	0.0517498	0.055	0.021	1	Two-sided Wilcoxon test	0.25	5
Cd2ap	0.0111706	-0.178531	0.489	0.569	1	Two-sided Wilcoxon test	0.25	5
Ip6k2	0.0112501	0.0708556	0.338	0.246	1	Two-sided Wilcoxon test	0.25	5
2610301B20Rik	0.0112579	-0.105286	0.162	0.22	1	Two-sided Wilcoxon test	0.25	5
Hist1h4i	0.0112781	0.0282721	0.138	0.079	1	Two-sided Wilcoxon test	0.25	5
Spats2	0.0112881	-0.178812	0.552	0.622	1	Two-sided Wilcoxon test	0.25	5
Ier2	0.0113187	0.168063	0.485	0.408	1	Two-sided Wilcoxon test	0.25	5
Itpk1	0.0113444	-0.10885	0.091	0.141	1	Two-sided Wilcoxon test	0.25	5
Zeb1	0.0113481	-0.250578	0.773	0.812	1	Two-sided Wilcoxon test	0.25	5
Sec24b	0.0113653	-0.160657	0.469	0.54	1	Two-sided Wilcoxon test	0.25	5
H1fx	0.0113762	0.104363	0.326	0.249	1	Two-sided Wilcoxon test	0.25	5
Mrps12	0.0113811	0.0973052	0.375	0.282	1	Two-sided Wilcoxon test	0.25	5
6330403K07Rik	0.0113841	0.103837	0.192	0.126	1	Two-sided Wilcoxon test	0.25	5
Dnajc27	0.0115378	-0.116886	0.133	0.194	1	Two-sided Wilcoxon test	0.25	5
Gm43569	0.0115402	-0.105541	0.055	0.097	1	Two-sided Wilcoxon test	0.25	5
Plat	0.0115918	0.000237938	0.146	0.085	1	Two-sided Wilcoxon test	0.25	5
Eif4b	0.0116114	-0.152782	0.628	0.663	1	Two-sided Wilcoxon test	0.25	5
Nhsl1	0.0116447	-0.16734	0.466	0.537	1	Two-sided Wilcoxon test	0.25	5
R3hdm1	0.0116475	-0.195087	0.724	0.768	1	Two-sided Wilcoxon test	0.25	5
mt-Atp6	0.0116708	0.167528	1	1	1	Two-sided Wilcoxon test	0.25	5
Cabyr	0.0116786	-0.0605846	0.032	0.067	1	Two-sided Wilcoxon test	0.25	5
Rnf14	0.0117054	-0.188966	0.339	0.396	1	Two-sided Wilcoxon test	0.25	5
Npc2	0.0117228	0.143408	0.617	0.572	1	Two-sided Wilcoxon test	0.25	5
Gzf1	0.0117315	0.0697491	0.247	0.173	1	Two-sided Wilcoxon test	0.25	5
Gab1	0.0117373	-0.226539	0.643	0.68	1	Two-sided Wilcoxon test	0.25	5
Fam49a	0.0118498	-0.230194	0.498	0.545	1	Two-sided Wilcoxon test	0.25	5
4930556N13Rik	0.0118507	-0.0739634	0.052	0.094	1	Two-sided Wilcoxon test	0.25	5
Lcmt2	0.0118664	0.0394537	0.068	0.029	1	Two-sided Wilcoxon test	0.25	5
Alyref	0.0118791	0.0783907	0.321	0.24	1	Two-sided Wilcoxon test	0.25	5
Tcn2	0.0119126	0.0404296	0.185	0.12	1	Two-sided Wilcoxon test	0.25	5
Bcas2	0.0119184	0.164263	0.625	0.572	1	Two-sided Wilcoxon test	0.25	5
Myocd	0.0119287	-0.183096	0.771	0.809	1	Two-sided Wilcoxon test	0.25	5
Tpbg	0.0119359	0.0428196	0.08	0.038	1	Two-sided Wilcoxon test	0.25	5
Hectd1	0.0119464	-0.18757	0.716	0.765	1	Two-sided Wilcoxon test	0.25	5
Ndufb11	0.011963	0.148888	0.628	0.578	1	Two-sided Wilcoxon test	0.25	5
Sipa1l2	0.0119632	-0.171504	0.62	0.669	1	Two-sided Wilcoxon test	0.25	5
Rbbp6	0.0119753	-0.17132	0.597	0.666	1	Two-sided Wilcoxon test	0.25	5
Atp5g3	0.0120154	0.12727	0.844	0.809	1	Two-sided Wilcoxon test	0.25	5
Tpp2	0.0120179	-0.196433	0.614	0.672	1	Two-sided Wilcoxon test	0.25	5
Arf3	0.012031	0.0997404	0.386	0.311	1	Two-sided Wilcoxon test	0.25	5
Nsd1	0.0120508	-0.149004	0.847	0.868	1	Two-sided Wilcoxon test	0.25	5
Mapk9	0.0120641	-0.169315	0.278	0.337	1	Two-sided Wilcoxon test	0.25	5
Zmynd8	0.0120833	-0.1304	0.575	0.63	1	Two-sided Wilcoxon test	0.25	5
Psmb5	0.012084	0.102969	0.557	0.472	1	Two-sided Wilcoxon test	0.25	5
Rab3ip	0.0120882	-0.18056	0.464	0.522	1	Two-sided Wilcoxon test	0.25	5
Slc5a3	0.0120903	0.050576	0.154	0.094	1	Two-sided Wilcoxon test	0.25	5
Kif20a	0.0121486	0.070608	0.205	0.138	1	Two-sided Wilcoxon test	0.25	5
Plekha7	0.0121914	-0.169299	0.625	0.663	1	Two-sided Wilcoxon test	0.25	5
Magi1	0.0122624	-0.183164	0.981	0.968	1	Two-sided Wilcoxon test	0.25	5
Cpq	0.0123934	-0.192544	0.651	0.68	1	Two-sided Wilcoxon test	0.25	5
Tmed1	0.0123976	0.0640957	0.317	0.238	1	Two-sided Wilcoxon test	0.25	5
Vcl	0.0124046	-0.223029	0.872	0.915	1	Two-sided Wilcoxon test	0.25	5
6330418K02Rik	0.0124052	0.0206527	0.05	0.018	1	Two-sided Wilcoxon test	0.25	5
Mocs2	0.0124343	0.083733	0.287	0.214	1	Two-sided Wilcoxon test	0.25	5
Trim24	0.0124746	-0.187753	0.495	0.554	1	Two-sided Wilcoxon test	0.25	5
Jpt2	0.0125546	0.0724505	0.282	0.208	1	Two-sided Wilcoxon test	0.25	5
Ergic2	0.012561	-0.146286	0.51	0.563	1	Two-sided Wilcoxon test	0.25	5
Rc3h2	0.0125794	-0.191814	0.44	0.499	1	Two-sided Wilcoxon test	0.25	5
Efemp1	0.0125973	0.0252509	0.068	0.029	1	Two-sided Wilcoxon test	0.25	5
Tns1	0.0126246	-0.171903	0.565	0.622	1	Two-sided Wilcoxon test	0.25	5
Tut4	0.0126822	-0.168738	0.812	0.859	1	Two-sided Wilcoxon test	0.25	5
Rpl4	0.0126922	0.145018	0.843	0.842	1	Two-sided Wilcoxon test	0.25	5
Gm15738	0.012752	-0.136501	0.138	0.199	1	Two-sided Wilcoxon test	0.25	5
Lrig2	0.0127643	-0.144261	0.287	0.346	1	Two-sided Wilcoxon test	0.25	5
Smoc2	0.0127744	0.0718773	0.093	0.047	1	Two-sided Wilcoxon test	0.25	5
Syncrip	0.0127819	-0.170069	0.698	0.768	1	Two-sided Wilcoxon test	0.25	5
Aip	0.0127912	0.0650992	0.346	0.261	1	Two-sided Wilcoxon test	0.25	5
Rev1	0.0128015	-0.163311	0.567	0.619	1	Two-sided Wilcoxon test	0.25	5
Ogn	0.0128126	-0.0984587	0.049	0.088	1	Two-sided Wilcoxon test	0.25	5
Trip11	0.0128593	-0.132488	0.531	0.587	1	Two-sided Wilcoxon test	0.25	5
Hecw2	0.0128873	-0.385616	0.571	0.601	1	Two-sided Wilcoxon test	0.25	5
Dolk	0.0128912	0.0798868	0.106	0.059	1	Two-sided Wilcoxon test	0.25	5
Mef2d	0.0129116	-0.15827	0.425	0.475	1	Two-sided Wilcoxon test	0.25	5
Pdlim4	0.012916	0.0348094	0.063	0.026	1	Two-sided Wilcoxon test	0.25	5
Hist1h2ae	0.0129348	0.188952	0.5	0.422	1	Two-sided Wilcoxon test	0.25	5
Rrad	0.0129367	0.212267	0.667	0.589	1	Two-sided Wilcoxon test	0.25	5
Fignl2	0.0129383	0.0410551	0.058	0.023	1	Two-sided Wilcoxon test	0.25	5
Canx	0.012944	0.117181	0.782	0.736	1	Two-sided Wilcoxon test	0.25	5
Mir133a-1hg	0.0129582	-0.107293	0.127	0.185	1	Two-sided Wilcoxon test	0.25	5
Cop1	0.0129595	-0.129274	0.622	0.689	1	Two-sided Wilcoxon test	0.25	5
Foxo4	0.0129816	0.0249737	0.08	0.038	1	Two-sided Wilcoxon test	0.25	5
Rpsa	0.0129911	0.170771	0.968	0.968	1	Two-sided Wilcoxon test	0.25	5
Maf1	0.0130046	0.0840221	0.321	0.235	1	Two-sided Wilcoxon test	0.25	5
Paics	0.0130709	0.130753	0.544	0.466	1	Two-sided Wilcoxon test	0.25	5
Nfu1	0.0131174	0.0920829	0.42	0.34	1	Two-sided Wilcoxon test	0.25	5
Timm50	0.0131378	0.0129988	0.339	0.243	1	Two-sided Wilcoxon test	0.25	5
Inpp4b	0.0131544	0.133518	0.219	0.15	1	Two-sided Wilcoxon test	0.25	5
Txn1	0.0131596	0.161623	0.722	0.689	1	Two-sided Wilcoxon test	0.25	5
Luzp1	0.0131606	-0.168153	0.674	0.73	1	Two-sided Wilcoxon test	0.25	5
Mapk8	0.0131808	-0.191829	0.489	0.537	1	Two-sided Wilcoxon test	0.25	5
Zfp706	0.0132076	0.167767	0.631	0.563	1	Two-sided Wilcoxon test	0.25	5
Hdgfl3	0.0132137	-0.192151	0.494	0.56	1	Two-sided Wilcoxon test	0.25	5
Dapk1	0.0132148	0.089807	0.211	0.144	1	Two-sided Wilcoxon test	0.25	5
N4bp2l2	0.013221	-0.177949	0.633	0.669	1	Two-sided Wilcoxon test	0.25	5
Epha4	0.0132613	0.0790444	0.36	0.276	1	Two-sided Wilcoxon test	0.25	5
Herpud1	0.0132645	0.0882971	0.328	0.249	1	Two-sided Wilcoxon test	0.25	5
Spc25	0.0132744	0.0441906	0.256	0.179	1	Two-sided Wilcoxon test	0.25	5
Tlk2	0.013302	-0.270975	0.614	0.651	1	Two-sided Wilcoxon test	0.25	5
Uqcrc1	0.0133198	0.148083	0.62	0.554	1	Two-sided Wilcoxon test	0.25	5
Cfdp1	0.0133345	0.155586	0.648	0.575	1	Two-sided Wilcoxon test	0.25	5
Rapgef2	0.013347	-0.193506	0.628	0.689	1	Two-sided Wilcoxon test	0.25	5
Selenoh	0.0133519	0.174736	0.547	0.499	1	Two-sided Wilcoxon test	0.25	5
Supt4a	0.01337	0.141563	0.477	0.402	1	Two-sided Wilcoxon test	0.25	5
Pfn1	0.0134066	0.172042	0.753	0.748	1	Two-sided Wilcoxon test	0.25	5
Cfl1	0.0134285	0.13077	0.734	0.701	1	Two-sided Wilcoxon test	0.25	5
Atf1	0.0134884	-0.105562	0.388	0.46	1	Two-sided Wilcoxon test	0.25	5
Mcc	0.0134956	-0.238602	0.763	0.78	1	Two-sided Wilcoxon test	0.25	5
Cdc42se2	0.0135816	-0.204077	0.526	0.592	1	Two-sided Wilcoxon test	0.25	5
4932413F04Rik	0.0136505	-0.0292047	0.023	0.053	1	Two-sided Wilcoxon test	0.25	5
Dennd1a	0.0136542	-0.207961	0.698	0.736	1	Two-sided Wilcoxon test	0.25	5
Pter	0.0136688	-0.159392	0.261	0.323	1	Two-sided Wilcoxon test	0.25	5
Hist1h3f	0.0136794	0.0313013	0.067	0.029	1	Two-sided Wilcoxon test	0.25	5
Vipas39	0.0137095	0.0813707	0.172	0.114	1	Two-sided Wilcoxon test	0.25	5
Sgip1	0.0137124	0.0865767	0.094	0.05	1	Two-sided Wilcoxon test	0.25	5
Asb13	0.0137165	0.0195603	0.058	0.023	1	Two-sided Wilcoxon test	0.25	5
Maf	0.013722	0.0362533	0.088	0.044	1	Two-sided Wilcoxon test	0.25	5
E130307A14Rik	0.0137491	-0.262343	0.422	0.457	1	Two-sided Wilcoxon test	0.25	5
Epc2	0.0137549	-0.157611	0.562	0.613	1	Two-sided Wilcoxon test	0.25	5
Prr12	0.0137695	0.0873789	0.287	0.214	1	Two-sided Wilcoxon test	0.25	5
Sdc4	0.013778	0.0536613	0.232	0.161	1	Two-sided Wilcoxon test	0.25	5
Tsnax	0.0138086	-0.174998	0.388	0.434	1	Two-sided Wilcoxon test	0.25	5
Nsmce2	0.0138106	-0.204466	0.664	0.701	1	Two-sided Wilcoxon test	0.25	5
Atp2c1	0.0138649	-0.124474	0.503	0.563	1	Two-sided Wilcoxon test	0.25	5
Txndc12	0.0138655	0.0831282	0.365	0.279	1	Two-sided Wilcoxon test	0.25	5
Eprs	0.0139147	-0.149853	0.753	0.827	1	Two-sided Wilcoxon test	0.25	5
Pcyt1b	0.0139366	0.0153453	0.071	0.032	1	Two-sided Wilcoxon test	0.25	5
Prkdc	0.0139519	-0.223368	0.433	0.49	1	Two-sided Wilcoxon test	0.25	5
Poglut1	0.0139634	0.085196	0.226	0.161	1	Two-sided Wilcoxon test	0.25	5
Dlg1	0.0139773	-0.262329	0.792	0.83	1	Two-sided Wilcoxon test	0.25	5
Gm41757	0.0140114	-0.0957393	0.049	0.088	1	Two-sided Wilcoxon test	0.25	5
Zbtb5	0.0140275	0.015904	0.179	0.114	1	Two-sided Wilcoxon test	0.25	5
Snta1	0.0140335	-0.121021	0.344	0.402	1	Two-sided Wilcoxon test	0.25	5
Higd2a	0.0140372	0.116703	0.474	0.399	1	Two-sided Wilcoxon test	0.25	5
Hist1h3i	0.0140432	0.0437526	0.075	0.035	1	Two-sided Wilcoxon test	0.25	5
Vps50	0.0140944	-0.175506	0.334	0.387	1	Two-sided Wilcoxon test	0.25	5
Mboat2	0.0141049	-0.165675	0.623	0.66	1	Two-sided Wilcoxon test	0.25	5
Mdp1	0.0141229	0.108434	0.341	0.264	1	Two-sided Wilcoxon test	0.25	5
Prpf31	0.0141346	0.0572296	0.346	0.255	1	Two-sided Wilcoxon test	0.25	5
Tomm6	0.0141442	0.134526	0.513	0.455	1	Two-sided Wilcoxon test	0.25	5
Gm28370	0.0141624	-0.0316088	0.021	0.05	1	Two-sided Wilcoxon test	0.25	5
Rbm43	0.014166	0.0482116	0.067	0.029	1	Two-sided Wilcoxon test	0.25	5
BC052040	0.0141787	-0.221547	0.481	0.516	1	Two-sided Wilcoxon test	0.25	5
Myl4	0.0141824	0.182735	0.977	0.974	1	Two-sided Wilcoxon test	0.25	5
Polrmt	0.0141915	0.00802765	0.101	0.053	1	Two-sided Wilcoxon test	0.25	5
Snx32	0.0142197	-0.0573557	0.071	0.117	1	Two-sided Wilcoxon test	0.25	5
Ntrk3	0.014269	-0.0195052	0.071	0.032	1	Two-sided Wilcoxon test	0.25	5
Synpo2l	0.0143057	0.126948	0.563	0.478	1	Two-sided Wilcoxon test	0.25	5
Zik1	0.0143171	0.0316423	0.114	0.065	1	Two-sided Wilcoxon test	0.25	5
Wwp1	0.0143535	-0.237224	0.619	0.672	1	Two-sided Wilcoxon test	0.25	5
Ifitm2	0.0144665	0.172827	0.476	0.425	1	Two-sided Wilcoxon test	0.25	5
Tmsb15b1	0.0144692	0.000166293	0.063	0.026	1	Two-sided Wilcoxon test	0.25	5
Fkbp2	0.0144864	0.110396	0.365	0.287	1	Two-sided Wilcoxon test	0.25	5
Kidins220	0.0145098	-0.167079	0.622	0.657	1	Two-sided Wilcoxon test	0.25	5
1810044D09Rik	0.0145302	0.0246274	0.062	0.026	1	Two-sided Wilcoxon test	0.25	5
Tmem60	0.0145488	0.0526722	0.325	0.24	1	Two-sided Wilcoxon test	0.25	5
Tomm40	0.0145782	-0.137899	0.466	0.507	1	Two-sided Wilcoxon test	0.25	5
Prtg	0.0145894	-0.237739	0.55	0.604	1	Two-sided Wilcoxon test	0.25	5
S1pr3	0.0146867	0.0524279	0.117	0.067	1	Two-sided Wilcoxon test	0.25	5
Il15	0.0147262	0.0496702	0.122	0.07	1	Two-sided Wilcoxon test	0.25	5
Cwf19l2	0.0147472	-0.179329	0.414	0.472	1	Two-sided Wilcoxon test	0.25	5
Traf3ip2	0.0147866	-0.102495	0.151	0.208	1	Two-sided Wilcoxon test	0.25	5
Samd4b	0.0147967	0.0805196	0.261	0.185	1	Two-sided Wilcoxon test	0.25	5
C230038L03Rik	0.014818	-0.0563858	0.028	0.059	1	Two-sided Wilcoxon test	0.25	5
Arhgef10	0.014864	-0.188695	0.253	0.305	1	Two-sided Wilcoxon test	0.25	5
Wdr6	0.0148768	0.0792294	0.278	0.208	1	Two-sided Wilcoxon test	0.25	5
Magoh	0.0149232	0.13297	0.562	0.49	1	Two-sided Wilcoxon test	0.25	5
Tbc1d10b	0.0149243	-0.0877767	0.166	0.223	1	Two-sided Wilcoxon test	0.25	5
Isl1	0.0149469	-0.120523	0.107	0.158	1	Two-sided Wilcoxon test	0.25	5
Nup153	0.0149863	-0.225227	0.528	0.584	1	Two-sided Wilcoxon test	0.25	5
Rbbp4	0.0150005	0.0843523	0.675	0.636	1	Two-sided Wilcoxon test	0.25	5
Grk3	0.0150079	-0.206009	0.222	0.276	1	Two-sided Wilcoxon test	0.25	5
2810001G20Rik	0.0150171	0.0690462	0.144	0.091	1	Two-sided Wilcoxon test	0.25	5
Tnks2	0.0150319	-0.151902	0.838	0.85	1	Two-sided Wilcoxon test	0.25	5
Synpo	0.0150363	0.0303273	0.107	0.059	1	Two-sided Wilcoxon test	0.25	5
Gm13091	0.0150429	-0.0791732	0.042	0.079	1	Two-sided Wilcoxon test	0.25	5
Kdm5a	0.015064	-0.187288	0.63	0.66	1	Two-sided Wilcoxon test	0.25	5
Oip5os1	0.0150788	-0.166163	0.666	0.698	1	Two-sided Wilcoxon test	0.25	5
Acaa1a	0.0150838	0.107943	0.286	0.214	1	Two-sided Wilcoxon test	0.25	5
Nt5dc1	0.0151095	-0.102419	0.227	0.29	1	Two-sided Wilcoxon test	0.25	5
Rsf1	0.0151147	-0.179004	0.625	0.704	1	Two-sided Wilcoxon test	0.25	5
Zfp280d	0.0151524	-0.177216	0.685	0.733	1	Two-sided Wilcoxon test	0.25	5
Suco	0.0151593	-0.192167	0.557	0.601	1	Two-sided Wilcoxon test	0.25	5
Grpel1	0.0151687	0.104545	0.541	0.443	1	Two-sided Wilcoxon test	0.25	5
Eif4g3	0.0152067	-0.216411	0.763	0.809	1	Two-sided Wilcoxon test	0.25	5
Gm36198	0.0152219	-0.128638	0.148	0.208	1	Two-sided Wilcoxon test	0.25	5
Hspa13	0.0152428	0.0688464	0.289	0.214	1	Two-sided Wilcoxon test	0.25	5
Ptger4	0.0152485	-0.0350652	0.021	0.05	1	Two-sided Wilcoxon test	0.25	5
Ciao2a	0.0152554	0.139301	0.461	0.39	1	Two-sided Wilcoxon test	0.25	5
Pmf1	0.0152896	0.0895367	0.315	0.235	1	Two-sided Wilcoxon test	0.25	5
Etfrf1	0.0152932	0.0629027	0.182	0.12	1	Two-sided Wilcoxon test	0.25	5
Nr2c2	0.0153219	-0.222188	0.515	0.56	1	Two-sided Wilcoxon test	0.25	5
1810026B05Rik	0.0153554	-0.213482	0.515	0.551	1	Two-sided Wilcoxon test	0.25	5
Atp7b	0.0153819	-0.107928	0.102	0.152	1	Two-sided Wilcoxon test	0.25	5
Gfra1	0.0153967	0.0374149	0.067	0.029	1	Two-sided Wilcoxon test	0.25	5
Stard9	0.0154092	-0.131835	0.13	0.182	1	Two-sided Wilcoxon test	0.25	5
Kmt2d	0.0154484	-0.133005	0.268	0.326	1	Two-sided Wilcoxon test	0.25	5
Sept3	0.0154499	0.0195357	0.067	0.029	1	Two-sided Wilcoxon test	0.25	5
Atp6v1f	0.0154598	0.151208	0.498	0.437	1	Two-sided Wilcoxon test	0.25	5
Cbr1	0.0154742	0.0383887	0.234	0.158	1	Two-sided Wilcoxon test	0.25	5
Chst14	0.0154824	0.0202108	0.088	0.044	1	Two-sided Wilcoxon test	0.25	5
Hspb1	0.0155095	0.143064	0.873	0.856	1	Two-sided Wilcoxon test	0.25	5
Vsnl1	0.0155224	0.118713	0.169	0.109	1	Two-sided Wilcoxon test	0.25	5
Tpp1	0.0155359	0.0996818	0.3	0.226	1	Two-sided Wilcoxon test	0.25	5
Tmem43	0.015625	0.0325045	0.083	0.041	1	Two-sided Wilcoxon test	0.25	5
Igfbp5	0.0156373	0.283635	0.739	0.692	1	Two-sided Wilcoxon test	0.25	5
Mybpc1	0.0156498	-0.138066	0.06	0.103	1	Two-sided Wilcoxon test	0.25	5
Luc7l3	0.0156687	-0.130084	0.696	0.73	1	Two-sided Wilcoxon test	0.25	5
Smco4	0.0157285	0.0465002	0.231	0.161	1	Two-sided Wilcoxon test	0.25	5
Rnf141	0.0157632	0.036476	0.174	0.114	1	Two-sided Wilcoxon test	0.25	5
Slc10a1	0.0157652	-0.0591447	0.036	0.07	1	Two-sided Wilcoxon test	0.25	5
Satb1	0.0157693	-0.180806	0.336	0.396	1	Two-sided Wilcoxon test	0.25	5
Vkorc1	0.0158221	0.0831833	0.304	0.223	1	Two-sided Wilcoxon test	0.25	5
Snrpa	0.0159145	0.119828	0.485	0.413	1	Two-sided Wilcoxon test	0.25	5
Crnkl1	0.0159379	0.0468626	0.321	0.238	1	Two-sided Wilcoxon test	0.25	5
Psme3	0.0159441	0.0832515	0.265	0.196	1	Two-sided Wilcoxon test	0.25	5
Cnot2	0.0159902	-0.120829	0.667	0.736	1	Two-sided Wilcoxon test	0.25	5
Sema3e	0.0160278	0.00743748	0.054	0.021	1	Two-sided Wilcoxon test	0.25	5
Espl1	0.0160873	0.0435628	0.159	0.1	1	Two-sided Wilcoxon test	0.25	5
Znhit1	0.0161955	0.10948	0.328	0.252	1	Two-sided Wilcoxon test	0.25	5
Aamdc	0.0161969	0.0382536	0.208	0.141	1	Two-sided Wilcoxon test	0.25	5
Herc1	0.0162123	-0.161751	0.724	0.783	1	Two-sided Wilcoxon test	0.25	5
Lamb2	0.0162266	0.1489	0.229	0.17	1	Two-sided Wilcoxon test	0.25	5
Raly	0.0162369	0.11139	0.427	0.361	1	Two-sided Wilcoxon test	0.25	5
Gxylt2	0.0162455	0.018885	0.054	0.021	1	Two-sided Wilcoxon test	0.25	5
Larp4	0.0163025	-0.21849	0.654	0.716	1	Two-sided Wilcoxon test	0.25	5
Cnih4	0.0163547	0.142021	0.589	0.507	1	Two-sided Wilcoxon test	0.25	5
Slc44a5	0.0163575	0.041066	0.062	0.026	1	Two-sided Wilcoxon test	0.25	5
Lnpk	0.0163779	-0.1681	0.432	0.481	1	Two-sided Wilcoxon test	0.25	5
Fam50a	0.0164138	0.0661888	0.313	0.238	1	Two-sided Wilcoxon test	0.25	5
Fbln1	0.0164763	0.138653	0.529	0.449	1	Two-sided Wilcoxon test	0.25	5
Myo1c	0.016493	0.0743036	0.253	0.182	1	Two-sided Wilcoxon test	0.25	5
Ddx50	0.0166051	-0.150558	0.596	0.642	1	Two-sided Wilcoxon test	0.25	5
Gata4	0.0166549	-0.181203	0.802	0.842	1	Two-sided Wilcoxon test	0.25	5
Wwtr1	0.0167372	-0.156078	0.51	0.572	1	Two-sided Wilcoxon test	0.25	5
Smyd5	0.0167752	0.0539532	0.198	0.135	1	Two-sided Wilcoxon test	0.25	5
Eif3m	0.016777	0.111269	0.651	0.592	1	Two-sided Wilcoxon test	0.25	5
Smpd2	0.0167786	0.0469176	0.138	0.085	1	Two-sided Wilcoxon test	0.25	5
Pkm	0.016856	-0.173358	0.92	0.935	1	Two-sided Wilcoxon test	0.25	5
Idh3b	0.0168662	0.0889485	0.479	0.39	1	Two-sided Wilcoxon test	0.25	5
Tmem9	0.0168748	0.0713545	0.39	0.299	1	Two-sided Wilcoxon test	0.25	5
Glrx5	0.0168777	0.141622	0.662	0.592	1	Two-sided Wilcoxon test	0.25	5
Gm43915	0.0168956	-0.078651	0.071	0.117	1	Two-sided Wilcoxon test	0.25	5
Dnpep	0.0168993	0.049764	0.346	0.264	1	Two-sided Wilcoxon test	0.25	5
Ccdc7a	0.0169827	-0.0740417	0.028	0.059	1	Two-sided Wilcoxon test	0.25	5
Zfp335	0.0170505	0.0503973	0.089	0.047	1	Two-sided Wilcoxon test	0.25	5
Neil2	0.0170835	-0.113222	0.123	0.176	1	Two-sided Wilcoxon test	0.25	5
Nxt1	0.0171632	0.110216	0.286	0.214	1	Two-sided Wilcoxon test	0.25	5
Ube2h	0.0171755	-0.157968	0.677	0.733	1	Two-sided Wilcoxon test	0.25	5
Cenpp	0.0172212	-0.253172	0.414	0.457	1	Two-sided Wilcoxon test	0.25	5
Nme7	0.0172577	-0.120766	0.477	0.525	1	Two-sided Wilcoxon test	0.25	5
Prkce	0.0173347	-0.160023	0.781	0.836	1	Two-sided Wilcoxon test	0.25	5
Astn2	0.0173498	0.012727	0.086	0.044	1	Two-sided Wilcoxon test	0.25	5
Brap	0.0173521	0.0445456	0.211	0.141	1	Two-sided Wilcoxon test	0.25	5
Bloc1s1	0.0173797	0.0544857	0.177	0.117	1	Two-sided Wilcoxon test	0.25	5
Fahd2a	0.0174132	0.0595619	0.188	0.129	1	Two-sided Wilcoxon test	0.25	5
Ube2w	0.0174157	-0.167922	0.425	0.478	1	Two-sided Wilcoxon test	0.25	5
Ythdf2	0.017434	0.104489	0.446	0.364	1	Two-sided Wilcoxon test	0.25	5
Tmem218	0.0174786	-0.00167352	0.128	0.076	1	Two-sided Wilcoxon test	0.25	5
Pkig	0.0174796	0.106625	0.662	0.595	1	Two-sided Wilcoxon test	0.25	5
Ccar2	0.0174796	0.0544661	0.19	0.129	1	Two-sided Wilcoxon test	0.25	5
Rps3	0.0175095	0.156409	0.899	0.927	1	Two-sided Wilcoxon test	0.25	5
Tnks	0.0175727	-0.21456	0.773	0.812	1	Two-sided Wilcoxon test	0.25	5
4933433G19Rik	0.017576	-0.0383633	0.034	0.067	1	Two-sided Wilcoxon test	0.25	5
Nprl2	0.0175766	0.0380615	0.097	0.053	1	Two-sided Wilcoxon test	0.25	5
Cox7a1	0.0175882	0.0842749	0.292	0.217	1	Two-sided Wilcoxon test	0.25	5
Bud23	0.0176028	0.0698648	0.294	0.226	1	Two-sided Wilcoxon test	0.25	5
Vps13d	0.0176494	-0.263699	0.61	0.622	1	Two-sided Wilcoxon test	0.25	5
C1qtnf12	0.0177548	-0.0704868	0.097	0.147	1	Two-sided Wilcoxon test	0.25	5
Eno2	0.0177729	0.0258411	0.07	0.032	1	Two-sided Wilcoxon test	0.25	5
9430091E24Rik	0.0177729	-0.113706	0.044	0.079	1	Two-sided Wilcoxon test	0.25	5
Nup62	0.0177831	0.0464954	0.357	0.282	1	Two-sided Wilcoxon test	0.25	5
Fbxo32	0.0178149	0.155134	0.343	0.264	1	Two-sided Wilcoxon test	0.25	5
Cryzl2	0.0178687	-0.0542543	0.131	0.185	1	Two-sided Wilcoxon test	0.25	5
Cdc5l	0.0179083	0.102385	0.502	0.419	1	Two-sided Wilcoxon test	0.25	5
Baiap2l1	0.0179133	-0.113232	0.315	0.378	1	Two-sided Wilcoxon test	0.25	5
Bcor	0.0179182	0.0834392	0.575	0.49	1	Two-sided Wilcoxon test	0.25	5
Spats2l	0.0179251	0.0661831	0.248	0.179	1	Two-sided Wilcoxon test	0.25	5
Apex1	0.0179947	0.115814	0.477	0.402	1	Two-sided Wilcoxon test	0.25	5
Cacfd1	0.0180364	0.0615252	0.206	0.141	1	Two-sided Wilcoxon test	0.25	5
Spryd7	0.0180623	0.0667564	0.216	0.147	1	Two-sided Wilcoxon test	0.25	5
Atp11b	0.0180803	-0.157399	0.5	0.545	1	Two-sided Wilcoxon test	0.25	5
Dmac1	0.0181462	0.071945	0.343	0.264	1	Two-sided Wilcoxon test	0.25	5
Gm20416	0.0181604	-0.0802898	0.068	0.111	1	Two-sided Wilcoxon test	0.25	5
Fam89b	0.018161	0.044883	0.255	0.182	1	Two-sided Wilcoxon test	0.25	5
Psmc4	0.0181834	0.105152	0.659	0.592	1	Two-sided Wilcoxon test	0.25	5
Rbm17	0.0182774	0.071693	0.42	0.343	1	Two-sided Wilcoxon test	0.25	5
Tmod1	0.0182945	-0.139225	0.687	0.724	1	Two-sided Wilcoxon test	0.25	5
Mageh1	0.0183074	0.0709046	0.187	0.129	1	Two-sided Wilcoxon test	0.25	5
Gm16794	0.0183282	-0.0649895	0.041	0.076	1	Two-sided Wilcoxon test	0.25	5
Exosc1	0.0183809	0.0354777	0.256	0.188	1	Two-sided Wilcoxon test	0.25	5
C030034I22Rik	0.0183989	0.0281999	0.07	0.032	1	Two-sided Wilcoxon test	0.25	5
Ints12	0.0184195	0.0208472	0.12	0.07	1	Two-sided Wilcoxon test	0.25	5
Cdkl5	0.0184316	-0.275166	0.349	0.399	1	Two-sided Wilcoxon test	0.25	5
Sumo3	0.0184778	0.0960495	0.458	0.387	1	Two-sided Wilcoxon test	0.25	5
Dcaf12l1	0.0184956	0.0698484	0.093	0.05	1	Two-sided Wilcoxon test	0.25	5
Aplp2	0.0185167	-0.171757	0.617	0.666	1	Two-sided Wilcoxon test	0.25	5
Mrpl32	0.0185212	0.0751716	0.442	0.355	1	Two-sided Wilcoxon test	0.25	5
Enpp1	0.0185753	0.0452047	0.073	0.035	1	Two-sided Wilcoxon test	0.25	5
Ide	0.0186091	-0.177693	0.456	0.496	1	Two-sided Wilcoxon test	0.25	5
Nckap1	0.0186299	-0.181362	0.679	0.707	1	Two-sided Wilcoxon test	0.25	5
Cactin	0.0186645	0.0400294	0.166	0.106	1	Two-sided Wilcoxon test	0.25	5
Gstcd	0.0186651	-0.175203	0.232	0.282	1	Two-sided Wilcoxon test	0.25	5
Diaph2	0.0187173	-0.235341	0.628	0.645	1	Two-sided Wilcoxon test	0.25	5
Ucp2	0.018721	0.0945484	0.227	0.164	1	Two-sided Wilcoxon test	0.25	5
Rb1cc1	0.0188078	-0.221868	0.541	0.598	1	Two-sided Wilcoxon test	0.25	5
Gm9828	0.0188117	0.0152237	0.057	0.023	1	Two-sided Wilcoxon test	0.25	5
Ctsb	0.0188427	0.102129	0.56	0.469	1	Two-sided Wilcoxon test	0.25	5
Shprh	0.0188668	-0.192893	0.393	0.44	1	Two-sided Wilcoxon test	0.25	5
Des	0.0188762	0.160431	0.763	0.698	1	Two-sided Wilcoxon test	0.25	5
S100b	0.0189221	-0.0657706	0.052	0.091	1	Two-sided Wilcoxon test	0.25	5
Dync2li1	0.0189924	0.0373547	0.127	0.076	1	Two-sided Wilcoxon test	0.25	5
Eif3b	0.0190206	0.117772	0.555	0.484	1	Two-sided Wilcoxon test	0.25	5
Parg	0.0190413	-0.182681	0.448	0.504	1	Two-sided Wilcoxon test	0.25	5
Ythdc1	0.0191272	-0.160471	0.729	0.78	1	Two-sided Wilcoxon test	0.25	5
Snrnp25	0.0192093	0.0419814	0.305	0.229	1	Two-sided Wilcoxon test	0.25	5
Gm20721	0.0192561	-0.104594	0.211	0.273	1	Two-sided Wilcoxon test	0.25	5
Ccdc73	0.0192901	-0.0895388	0.091	0.138	1	Two-sided Wilcoxon test	0.25	5
Axin1	0.0193434	-0.146869	0.269	0.331	1	Two-sided Wilcoxon test	0.25	5
Oser1	0.0193442	0.0726297	0.266	0.194	1	Two-sided Wilcoxon test	0.25	5
Znrd2	0.0193515	0.104839	0.43	0.343	1	Two-sided Wilcoxon test	0.25	5
Anxa7	0.0193614	0.051017	0.218	0.152	1	Two-sided Wilcoxon test	0.25	5
Gm42982	0.0193724	-0.0430187	0.032	0.065	1	Two-sided Wilcoxon test	0.25	5
Cgnl1	0.0194146	-0.169862	0.503	0.56	1	Two-sided Wilcoxon test	0.25	5
Zfp451	0.0194181	-0.153155	0.406	0.455	1	Two-sided Wilcoxon test	0.25	5
Ccser1	0.0194204	-0.0274315	0.102	0.056	1	Two-sided Wilcoxon test	0.25	5
Srm	0.0195175	0.112523	0.357	0.284	1	Two-sided Wilcoxon test	0.25	5
Ano3	0.0195305	0.109561	0.06	0.026	1	Two-sided Wilcoxon test	0.25	5
Asb7	0.0196088	0.0154516	0.222	0.152	1	Two-sided Wilcoxon test	0.25	5
Kctd4	0.0196523	-0.078305	0.063	0.106	1	Two-sided Wilcoxon test	0.25	5
Ethe1	0.0196614	0.0689996	0.208	0.147	1	Two-sided Wilcoxon test	0.25	5
Gorab	0.0196706	0.0400911	0.127	0.076	1	Two-sided Wilcoxon test	0.25	5
Cyb5r3	0.019695	0.0602581	0.37	0.296	1	Two-sided Wilcoxon test	0.25	5
Cers5	0.0196958	0.0992545	0.365	0.29	1	Two-sided Wilcoxon test	0.25	5
Pttg1	0.019717	0.0807891	0.398	0.314	1	Two-sided Wilcoxon test	0.25	5
Zfp445	0.0197522	-0.118938	0.416	0.469	1	Two-sided Wilcoxon test	0.25	5
Cox14	0.0197791	0.121846	0.49	0.419	1	Two-sided Wilcoxon test	0.25	5
Rrm2	0.0198312	0.0428353	0.365	0.273	1	Two-sided Wilcoxon test	0.25	5
Mitf	0.0199373	-0.159692	0.648	0.674	1	Two-sided Wilcoxon test	0.25	5
Rab3b	0.0199611	0.0214145	0.081	0.041	1	Two-sided Wilcoxon test	0.25	5
Ei24	0.0199974	0.06649	0.357	0.27	1	Two-sided Wilcoxon test	0.25	5
Prune1	0.0200259	0.0795913	0.205	0.141	1	Two-sided Wilcoxon test	0.25	5
Chmp2a	0.0200479	0.1102	0.409	0.323	1	Two-sided Wilcoxon test	0.25	5
Eif5a	0.0200699	0.119731	0.763	0.736	1	Two-sided Wilcoxon test	0.25	5
Syde2	0.0201087	-0.148285	0.278	0.334	1	Two-sided Wilcoxon test	0.25	5
Man1c1	0.0202005	-0.214024	0.442	0.49	1	Two-sided Wilcoxon test	0.25	5
Trim33	0.0202117	-0.126301	0.581	0.63	1	Two-sided Wilcoxon test	0.25	5
Uggt2	0.0202329	-0.17671	0.375	0.431	1	Two-sided Wilcoxon test	0.25	5
Lef1	0.020234	0.117555	0.369	0.29	1	Two-sided Wilcoxon test	0.25	5
Pik3ip1	0.0202721	0.0561317	0.127	0.076	1	Two-sided Wilcoxon test	0.25	5
Tufm	0.0202827	0.13285	0.357	0.287	1	Two-sided Wilcoxon test	0.25	5
2810006K23Rik	0.0202838	0.0345691	0.175	0.117	1	Two-sided Wilcoxon test	0.25	5
A930028N01Rik	0.0203027	-0.0330778	0.026	0.056	1	Two-sided Wilcoxon test	0.25	5
Thbs1	0.0203154	-0.00803859	0.112	0.065	1	Two-sided Wilcoxon test	0.25	5
Pitpnm2	0.0203597	-0.122733	0.362	0.419	1	Two-sided Wilcoxon test	0.25	5
Gmppb	0.0203615	0.00869939	0.123	0.073	1	Two-sided Wilcoxon test	0.25	5
Mrpl4	0.0203654	0.111425	0.352	0.276	1	Two-sided Wilcoxon test	0.25	5
Gm47644	0.0204255	-0.0817076	0.06	0.1	1	Two-sided Wilcoxon test	0.25	5
Gpx8	0.0204487	0.0533854	0.344	0.267	1	Two-sided Wilcoxon test	0.25	5
Frem1	0.0204526	-0.273729	0.317	0.367	1	Two-sided Wilcoxon test	0.25	5
Tmem208	0.0204665	0.0499981	0.347	0.27	1	Two-sided Wilcoxon test	0.25	5
Sh3gl3	0.0204914	0.0552758	0.084	0.044	1	Two-sided Wilcoxon test	0.25	5
Gpr22	0.0204955	0.0668449	0.19	0.132	1	Two-sided Wilcoxon test	0.25	5
Prex2	0.0205459	-0.0679937	0.144	0.088	1	Two-sided Wilcoxon test	0.25	5
Zcchc17	0.0205514	0.093068	0.391	0.302	1	Two-sided Wilcoxon test	0.25	5
Sypl	0.0206274	-0.147533	0.406	0.46	1	Two-sided Wilcoxon test	0.25	5
Zfp358	0.0206539	0.0328833	0.133	0.082	1	Two-sided Wilcoxon test	0.25	5
Ube2g2	0.0206674	-0.0706726	0.177	0.232	1	Two-sided Wilcoxon test	0.25	5
Ctcflos	0.0207004	0.0639279	0.088	0.047	1	Two-sided Wilcoxon test	0.25	5
Khdc4	0.0207018	-0.131398	0.406	0.46	1	Two-sided Wilcoxon test	0.25	5
Sdc1	0.0207238	0.0291648	0.081	0.041	1	Two-sided Wilcoxon test	0.25	5
AU041133	0.0207249	-0.141658	0.097	0.144	1	Two-sided Wilcoxon test	0.25	5
Gm11627	0.0207486	0.0200651	0.107	0.062	1	Two-sided Wilcoxon test	0.25	5
Lbh	0.020752	0.170386	0.596	0.545	1	Two-sided Wilcoxon test	0.25	5
Rab22a	0.020767	-0.171177	0.429	0.478	1	Two-sided Wilcoxon test	0.25	5
Sash1	0.0207842	-0.15586	0.333	0.39	1	Two-sided Wilcoxon test	0.25	5
Gm29237	0.0208232	-0.0275404	0.034	0.067	1	Two-sided Wilcoxon test	0.25	5
Mfsd10	0.020846	0.113626	0.222	0.161	1	Two-sided Wilcoxon test	0.25	5
Ebf2	0.0208765	0.0682985	0.06	0.026	1	Two-sided Wilcoxon test	0.25	5
Braf	0.0208847	-0.153246	0.674	0.707	1	Two-sided Wilcoxon test	0.25	5
Exosc5	0.0208889	0.0789635	0.205	0.144	1	Two-sided Wilcoxon test	0.25	5
Rhod	0.0209949	0.0400697	0.114	0.067	1	Two-sided Wilcoxon test	0.25	5
Znrf3	0.021066	-0.162236	0.573	0.619	1	Two-sided Wilcoxon test	0.25	5
Bcl2l12	0.02109	0.0630089	0.218	0.155	1	Two-sided Wilcoxon test	0.25	5
Fastk	0.0211165	0.148358	0.476	0.411	1	Two-sided Wilcoxon test	0.25	5
P4ha2	0.0211515	-0.163031	0.39	0.446	1	Two-sided Wilcoxon test	0.25	5
Galnt7	0.0211613	0.0601656	0.255	0.185	1	Two-sided Wilcoxon test	0.25	5
Eldr	0.0211983	0.0413702	0.068	0.032	1	Two-sided Wilcoxon test	0.25	5
Plag1	0.0212107	-0.161878	0.383	0.44	1	Two-sided Wilcoxon test	0.25	5
4933400F21Rik	0.0212199	-0.0658299	0.031	0.062	1	Two-sided Wilcoxon test	0.25	5
Tsn	0.0212604	0.106946	0.554	0.472	1	Two-sided Wilcoxon test	0.25	5
Idnk	0.0212683	0.0616583	0.219	0.158	1	Two-sided Wilcoxon test	0.25	5
Psmb4	0.0213049	0.139133	0.633	0.578	1	Two-sided Wilcoxon test	0.25	5
Hars2	0.0213371	0.0609852	0.188	0.129	1	Two-sided Wilcoxon test	0.25	5
Arf1	0.0213523	0.14094	0.737	0.689	1	Two-sided Wilcoxon test	0.25	5
Capza1	0.021364	0.0960101	0.609	0.525	1	Two-sided Wilcoxon test	0.25	5
Grb2	0.02139	-0.13224	0.511	0.566	1	Two-sided Wilcoxon test	0.25	5
Cdh13	0.0214017	-0.347895	0.657	0.677	1	Two-sided Wilcoxon test	0.25	5
Sik2	0.0214121	-0.180747	0.39	0.44	1	Two-sided Wilcoxon test	0.25	5
Unc45bos	0.0214213	-0.0963061	0.071	0.114	1	Two-sided Wilcoxon test	0.25	5
Iqsec1	0.0214452	-0.19961	0.789	0.827	1	Two-sided Wilcoxon test	0.25	5
Abcg2	0.0214662	0.0625717	0.414	0.326	1	Two-sided Wilcoxon test	0.25	5
Ppat	0.0215085	-0.153903	0.459	0.501	1	Two-sided Wilcoxon test	0.25	5
Smtn	0.0215848	0.0841833	0.161	0.106	1	Two-sided Wilcoxon test	0.25	5
Ncor2	0.0216477	-0.182005	0.362	0.422	1	Two-sided Wilcoxon test	0.25	5
Ypel5	0.0216817	0.0923012	0.317	0.238	1	Two-sided Wilcoxon test	0.25	5
Dut	0.0217525	0.148212	0.651	0.581	1	Two-sided Wilcoxon test	0.25	5
Kyat1	0.0217876	0.032168	0.063	0.029	1	Two-sided Wilcoxon test	0.25	5
Trp53	0.0217949	0.0804208	0.433	0.352	1	Two-sided Wilcoxon test	0.25	5
Zfp467	0.0218266	0.0221564	0.146	0.091	1	Two-sided Wilcoxon test	0.25	5
Tusc3	0.0218399	-0.176089	0.656	0.686	1	Two-sided Wilcoxon test	0.25	5
Dyrk1a	0.021847	-0.180385	0.765	0.812	1	Two-sided Wilcoxon test	0.25	5
Fgf1	0.0218605	-0.166935	0.11	0.158	1	Two-sided Wilcoxon test	0.25	5
Brk1	0.0219171	0.105244	0.573	0.504	1	Two-sided Wilcoxon test	0.25	5
Ano4	0.0220286	-0.237195	0.625	0.68	1	Two-sided Wilcoxon test	0.25	5
Nr3c1	0.0220627	-0.246335	0.356	0.405	1	Two-sided Wilcoxon test	0.25	5
Cox18	0.0220817	-0.162929	0.256	0.308	1	Two-sided Wilcoxon test	0.25	5
Cald1	0.0221083	0.146799	0.804	0.748	1	Two-sided Wilcoxon test	0.25	5
Lrp8	0.0221102	0.0289278	0.06	0.026	1	Two-sided Wilcoxon test	0.25	5
Zfp804b	0.0221192	0.176324	0.128	0.079	1	Two-sided Wilcoxon test	0.25	5
Syne4	0.0221492	0.0122448	0.068	0.032	1	Two-sided Wilcoxon test	0.25	5
Phf1	0.0221539	0.0469157	0.102	0.059	1	Two-sided Wilcoxon test	0.25	5
Rnf144a	0.0221573	-0.0418343	0.169	0.109	1	Two-sided Wilcoxon test	0.25	5
Glis2	0.022175	-0.149703	0.244	0.296	1	Two-sided Wilcoxon test	0.25	5
Nasp	0.0222481	0.116436	0.791	0.748	1	Two-sided Wilcoxon test	0.25	5
Meis2	0.0222631	-0.178383	0.792	0.85	1	Two-sided Wilcoxon test	0.25	5
Acvr1	0.0222693	-0.212884	0.489	0.537	1	Two-sided Wilcoxon test	0.25	5
Pitpnc1	0.0222712	0.150772	0.417	0.346	1	Two-sided Wilcoxon test	0.25	5
Cln8	0.0223292	0.0392572	0.125	0.076	1	Two-sided Wilcoxon test	0.25	5
Fmr1	0.0223407	-0.182646	0.549	0.589	1	Two-sided Wilcoxon test	0.25	5
Dab2	0.0223431	0.0604966	0.276	0.199	1	Two-sided Wilcoxon test	0.25	5
Oscp1	0.0223498	0.0538954	0.097	0.056	1	Two-sided Wilcoxon test	0.25	5
Pafah1b1	0.0223711	-0.125889	0.805	0.836	1	Two-sided Wilcoxon test	0.25	5
A830082K12Rik	0.0224214	0.0501037	0.08	0.041	1	Two-sided Wilcoxon test	0.25	5
Tril	0.0224531	0.0223619	0.076	0.038	1	Two-sided Wilcoxon test	0.25	5
Egfr	0.02249	0.0948442	0.135	0.085	1	Two-sided Wilcoxon test	0.25	5
Clasp1	0.0224967	-0.236062	0.88	0.897	1	Two-sided Wilcoxon test	0.25	5
Smpd4	0.0225018	0.0367615	0.248	0.179	1	Two-sided Wilcoxon test	0.25	5
Pycr1	0.0225051	0.0355353	0.067	0.032	1	Two-sided Wilcoxon test	0.25	5
Cdk4	0.0225178	0.177806	0.638	0.639	1	Two-sided Wilcoxon test	0.25	5
Marf1	0.0225456	-0.147806	0.273	0.326	1	Two-sided Wilcoxon test	0.25	5
Rabl2	0.0225927	0.0337897	0.122	0.073	1	Two-sided Wilcoxon test	0.25	5
Rela	0.0226302	0.0499591	0.154	0.103	1	Two-sided Wilcoxon test	0.25	5
Abhd11	0.0226481	-0.0532736	0.154	0.208	1	Two-sided Wilcoxon test	0.25	5
Med30	0.0227815	0.0325298	0.362	0.284	1	Two-sided Wilcoxon test	0.25	5
Zdhhc20	0.0228494	-0.193067	0.526	0.578	1	Two-sided Wilcoxon test	0.25	5
Rccd1	0.0228588	-0.146948	0.136	0.182	1	Two-sided Wilcoxon test	0.25	5
Paf1	0.0228983	0.0485447	0.294	0.217	1	Two-sided Wilcoxon test	0.25	5
Peg3	0.0229053	0.147707	0.846	0.809	1	Two-sided Wilcoxon test	0.25	5
Avpi1	0.0229653	0.0374315	0.201	0.141	1	Two-sided Wilcoxon test	0.25	5
Kcnk2	0.0230072	-0.0472505	0.076	0.038	1	Two-sided Wilcoxon test	0.25	5
Nrxn3	0.0230112	-0.00240396	0.187	0.123	1	Two-sided Wilcoxon test	0.25	5
Tmem126b	0.0230541	0.029315	0.211	0.147	1	Two-sided Wilcoxon test	0.25	5
Sarnp	0.0230814	-0.151502	0.731	0.757	1	Two-sided Wilcoxon test	0.25	5
Acad12	0.0230877	-0.0270936	0.023	0.05	1	Two-sided Wilcoxon test	0.25	5
Camk4	0.0231139	0.0395569	0.055	0.023	1	Two-sided Wilcoxon test	0.25	5
Upf1	0.0231318	0.0827623	0.344	0.267	1	Two-sided Wilcoxon test	0.25	5
Ddx39b	0.0232282	0.162395	0.722	0.689	1	Two-sided Wilcoxon test	0.25	5
Gpm6a	0.0232863	0.0142902	0.06	0.026	1	Two-sided Wilcoxon test	0.25	5
Mmp16	0.0233422	0.0222293	0.289	0.214	1	Two-sided Wilcoxon test	0.25	5
Nit2	0.0233617	0.0826499	0.263	0.199	1	Two-sided Wilcoxon test	0.25	5
Hdac4	0.0233887	-0.181006	0.39	0.44	1	Two-sided Wilcoxon test	0.25	5
9130401M01Rik	0.0233996	0.0298579	0.159	0.106	1	Two-sided Wilcoxon test	0.25	5
Gnai3	0.0234335	-0.150765	0.474	0.522	1	Two-sided Wilcoxon test	0.25	5
Ulk4	0.0234541	-0.130688	0.138	0.188	1	Two-sided Wilcoxon test	0.25	5
Grb14	0.0234578	-0.201746	0.422	0.478	1	Two-sided Wilcoxon test	0.25	5
Tmem109	0.0234578	0.0463007	0.188	0.129	1	Two-sided Wilcoxon test	0.25	5
Mlf1	0.0234582	0.0578213	0.252	0.176	1	Two-sided Wilcoxon test	0.25	5
Pabpn1	0.023469	-0.170572	0.612	0.648	1	Two-sided Wilcoxon test	0.25	5
Lxn	0.0234712	0.0320048	0.127	0.076	1	Two-sided Wilcoxon test	0.25	5
Puf60	0.0234855	0.105943	0.578	0.51	1	Two-sided Wilcoxon test	0.25	5
Hist2h2bb	0.023488	0.0406477	0.05	0.021	1	Two-sided Wilcoxon test	0.25	5
Gm17529	0.0235371	-0.080986	0.058	0.097	1	Two-sided Wilcoxon test	0.25	5
Lamtor5	0.0235455	0.074071	0.422	0.34	1	Two-sided Wilcoxon test	0.25	5
Nrip2	0.023573	-0.0307007	0.023	0.05	1	Two-sided Wilcoxon test	0.25	5
Sar1a	0.0236067	0.0732243	0.44	0.367	1	Two-sided Wilcoxon test	0.25	5
Lrig1	0.0236106	-0.180545	0.208	0.258	1	Two-sided Wilcoxon test	0.25	5
Trib1	0.0236258	0.0356388	0.075	0.038	1	Two-sided Wilcoxon test	0.25	5
Specc1	0.023638	0.0764317	0.33	0.252	1	Two-sided Wilcoxon test	0.25	5
Syne2	0.0236423	-0.157374	0.706	0.76	1	Two-sided Wilcoxon test	0.25	5
Snx19	0.0237865	0.0438538	0.209	0.147	1	Two-sided Wilcoxon test	0.25	5
Malsu1	0.023788	-0.215672	0.373	0.419	1	Two-sided Wilcoxon test	0.25	5
Pcyt1a	0.0238123	0.0396205	0.375	0.284	1	Two-sided Wilcoxon test	0.25	5
Ccdc127	0.023865	0.071987	0.341	0.261	1	Two-sided Wilcoxon test	0.25	5
Rgs17	0.0238667	0.0446675	0.058	0.026	1	Two-sided Wilcoxon test	0.25	5
Acss3	0.0238849	0.0532605	0.083	0.044	1	Two-sided Wilcoxon test	0.25	5
Srp19	0.0239132	0.127571	0.468	0.399	1	Two-sided Wilcoxon test	0.25	5
Zyx	0.0239263	0.0428788	0.38	0.293	1	Two-sided Wilcoxon test	0.25	5
Herc6	0.0239948	-0.0935989	0.128	0.179	1	Two-sided Wilcoxon test	0.25	5
Rnaset2a	0.0240009	0.0457005	0.109	0.065	1	Two-sided Wilcoxon test	0.25	5
Ccni	0.0240163	0.0772681	0.433	0.337	1	Two-sided Wilcoxon test	0.25	5
9430015G10Rik	0.0240331	0.0340569	0.11	0.065	1	Two-sided Wilcoxon test	0.25	5
Fign	0.024041	-0.20141	0.58	0.63	1	Two-sided Wilcoxon test	0.25	5
Snrpb	0.0240682	0.116461	0.734	0.704	1	Two-sided Wilcoxon test	0.25	5
Cdc7	0.0241266	-0.151527	0.188	0.235	1	Two-sided Wilcoxon test	0.25	5
Il31ra	0.0241639	-0.0609059	0.127	0.179	1	Two-sided Wilcoxon test	0.25	5
Klhl21	0.0242491	0.0362567	0.242	0.17	1	Two-sided Wilcoxon test	0.25	5
Fabp3	0.0242748	0.225842	0.713	0.683	1	Two-sided Wilcoxon test	0.25	5
Phf10	0.0243006	0.0819315	0.352	0.276	1	Two-sided Wilcoxon test	0.25	5
S100a13	0.0243183	0.0558009	0.237	0.173	1	Two-sided Wilcoxon test	0.25	5
Bod1l	0.0244351	-0.124919	0.494	0.54	1	Two-sided Wilcoxon test	0.25	5
Gatad1	0.0244374	0.0856356	0.424	0.343	1	Two-sided Wilcoxon test	0.25	5
Xpo4	0.0244383	-0.157692	0.479	0.537	1	Two-sided Wilcoxon test	0.25	5
Mdh2	0.0244439	0.1138	0.807	0.789	1	Two-sided Wilcoxon test	0.25	5
Dlg4	0.0244771	-0.00888469	0.123	0.073	1	Two-sided Wilcoxon test	0.25	5
Cad	0.0244819	0.0777912	0.252	0.188	1	Two-sided Wilcoxon test	0.25	5
Nav1	0.0244822	-0.209691	0.644	0.66	1	Two-sided Wilcoxon test	0.25	5
9530034E10Rik	0.0245369	-0.0486742	0.036	0.067	1	Two-sided Wilcoxon test	0.25	5
Gm15417	0.0245657	0.038558	0.067	0.032	1	Two-sided Wilcoxon test	0.25	5
Mgmt	0.0246362	0.0362276	0.244	0.173	1	Two-sided Wilcoxon test	0.25	5
Uvrag	0.0246683	-0.215848	0.606	0.616	1	Two-sided Wilcoxon test	0.25	5
Mrpl30	0.0246845	0.117019	0.469	0.396	1	Two-sided Wilcoxon test	0.25	5
B130024G19Rik	0.0247785	0.0444963	0.128	0.079	1	Two-sided Wilcoxon test	0.25	5
Mapk1ip1	0.0247985	-0.0773714	0.144	0.196	1	Two-sided Wilcoxon test	0.25	5
Rere	0.024847	-0.13241	0.94	0.947	1	Two-sided Wilcoxon test	0.25	5
Gm49958	0.0248499	-0.0921163	0.104	0.152	1	Two-sided Wilcoxon test	0.25	5
Mphosph10	0.024852	-0.171079	0.291	0.343	1	Two-sided Wilcoxon test	0.25	5
Amot	0.0249103	0.0739665	0.208	0.15	1	Two-sided Wilcoxon test	0.25	5
Gm43376	0.0249214	-0.0682005	0.076	0.12	1	Two-sided Wilcoxon test	0.25	5
[truncated: 9,491 more rows]

## Sheet: CM2
Supplementary Data 4. DEG in single cell datasets of Rnf20iEC-KO versus control embryos.
gene	p_val	avg_log2FC	pct.1	pct.2	p_val_adj	Test_used	fc.threshold (log2)	min.pct (%)
Hba-a1	2.01498e-27	1.46027	1	0.965	4.73197e-23	Two-sided Wilcoxon test	0.25	5
Hba-a2	6.0372e-23	1.39779	0.98	0.77	1.41778e-18	Two-sided Wilcoxon test	0.25	5
Hba-x	1.71047e-20	0.906686	1	1	4.01686e-16	Two-sided Wilcoxon test	0.25	5
Myh7	4.78821e-20	-1.455	0.694	0.93	1.12446e-15	Two-sided Wilcoxon test	0.25	5
Hbb-y	2.7636e-18	0.861583	1	1	6.49003e-14	Two-sided Wilcoxon test	0.25	5
Ttn	1.85847e-17	-1.28197	0.867	0.963	4.36443e-13	Two-sided Wilcoxon test	0.25	5
Xist	1.95964e-17	0.653281	0.153	0	4.60202e-13	Two-sided Wilcoxon test	0.25	5
Rplp1	2.08887e-15	1.09247	0.98	0.904	4.90551e-11	Two-sided Wilcoxon test	0.25	5
Rps12	8.34806e-14	0.998233	0.969	0.909	1.96046e-09	Two-sided Wilcoxon test	0.25	5
Nedd4	4.9416e-13	-0.741996	0.918	0.976	1.16048e-08	Two-sided Wilcoxon test	0.25	5
Rps19	1.1009e-12	1.03018	0.959	0.793	2.58535e-08	Two-sided Wilcoxon test	0.25	5
Rps15a	2.07649e-12	1.07294	0.99	0.937	4.87643e-08	Two-sided Wilcoxon test	0.25	5
Rpl37a	5.11981e-12	0.814743	0.98	0.846	1.20234e-07	Two-sided Wilcoxon test	0.25	5
Rpl41	7.83983e-12	0.951576	0.99	0.965	1.84111e-07	Two-sided Wilcoxon test	0.25	5
Rpl30	8.30207e-12	0.836402	0.99	0.887	1.94966e-07	Two-sided Wilcoxon test	0.25	5
Hspd1	8.46233e-12	-0.889943	0.898	0.957	1.98729e-07	Two-sided Wilcoxon test	0.25	5
Atp5e	1.29545e-11	1.03227	0.673	0.361	3.04223e-07	Two-sided Wilcoxon test	0.25	5
Rps20	2.01808e-11	0.71372	1	0.943	4.73925e-07	Two-sided Wilcoxon test	0.25	5
Nebl	3.43e-11	-0.803054	0.867	0.904	8.05501e-07	Two-sided Wilcoxon test	0.25	5
Mybpc3	3.46936e-11	-0.776878	0.816	0.911	8.14745e-07	Two-sided Wilcoxon test	0.25	5
Rps14	4.19927e-11	0.827241	0.99	0.959	9.86158e-07	Two-sided Wilcoxon test	0.25	5
Cmss1	6.04482e-11	-0.719289	0.929	0.98	1.41957e-06	Two-sided Wilcoxon test	0.25	5
Rps27a	1.56325e-10	0.758791	0.98	0.92	3.67115e-06	Two-sided Wilcoxon test	0.25	5
Rps11	1.59807e-10	0.781424	0.99	0.915	3.75291e-06	Two-sided Wilcoxon test	0.25	5
Rps17	1.86375e-10	0.78641	0.908	0.815	4.37683e-06	Two-sided Wilcoxon test	0.25	5
Rpl32	2.05168e-10	0.878994	0.99	0.889	4.81816e-06	Two-sided Wilcoxon test	0.25	5
Sptbn1	2.43889e-10	-0.882512	0.643	0.861	5.7275e-06	Two-sided Wilcoxon test	0.25	5
Rps26	7.61256e-10	0.756151	0.949	0.902	1.78773e-05	Two-sided Wilcoxon test	0.25	5
Hbb-bt	7.67643e-10	0.728247	0.714	0.367	1.80273e-05	Two-sided Wilcoxon test	0.25	5
Rpl23a	1.24385e-09	0.767275	0.908	0.763	2.92105e-05	Two-sided Wilcoxon test	0.25	5
Rps15	1.35464e-09	0.703731	0.98	0.893	3.18124e-05	Two-sided Wilcoxon test	0.25	5
Myh10	1.48419e-09	-0.83625	0.612	0.772	3.48547e-05	Two-sided Wilcoxon test	0.25	5
Cox6b1	1.89731e-09	0.775908	0.918	0.78	4.45564e-05	Two-sided Wilcoxon test	0.25	5
Rps24	2.02992e-09	0.674683	0.99	0.967	4.76707e-05	Two-sided Wilcoxon test	0.25	5
Gm2000	2.43969e-09	0.386594	0.194	0.033	5.72937e-05	Two-sided Wilcoxon test	0.25	5
Rpl34	2.61586e-09	0.84569	0.898	0.811	6.14308e-05	Two-sided Wilcoxon test	0.25	5
Rplp2	3.99936e-09	0.795798	0.847	0.691	9.39211e-05	Two-sided Wilcoxon test	0.25	5
Uqcr10	5.05485e-09	0.947899	0.765	0.543	0.000118708	Two-sided Wilcoxon test	0.25	5
Pgk1	5.43065e-09	-0.66506	0.827	0.93	0.000127533	Two-sided Wilcoxon test	0.25	5
Macf1	7.90704e-09	-0.846047	0.673	0.852	0.000185689	Two-sided Wilcoxon test	0.25	5
Rps25	9.39959e-09	0.614866	0.898	0.752	0.00022074	Two-sided Wilcoxon test	0.25	5
Hnrnpu	1.06381e-08	-0.717906	0.694	0.843	0.000249824	Two-sided Wilcoxon test	0.25	5
Rpl26	1.13616e-08	0.788186	0.949	0.833	0.000266816	Two-sided Wilcoxon test	0.25	5
Tpi1	1.38854e-08	-0.693246	0.857	0.943	0.000326085	Two-sided Wilcoxon test	0.25	5
Cav1	3.37576e-08	0.46795	0.143	0.02	0.000792763	Two-sided Wilcoxon test	0.25	5
Rpl31	3.59986e-08	0.735866	0.786	0.615	0.000845391	Two-sided Wilcoxon test	0.25	5
Hbb-bh1	3.66593e-08	0.626433	0.98	0.957	0.000860907	Two-sided Wilcoxon test	0.25	5
Gng5	4.1253e-08	0.770374	0.898	0.809	0.000968785	Two-sided Wilcoxon test	0.25	5
Rpl36	5.05274e-08	0.792881	0.796	0.585	0.00118659	Two-sided Wilcoxon test	0.25	5
Ndufaf8	7.55859e-08	0.516338	0.327	0.111	0.00177506	Two-sided Wilcoxon test	0.25	5
Srrm2	7.59252e-08	-0.682295	0.612	0.82	0.00178303	Two-sided Wilcoxon test	0.25	5
Snrpg	8.55154e-08	0.676848	0.755	0.537	0.00200824	Two-sided Wilcoxon test	0.25	5
Rps23	1.01061e-07	0.681562	0.929	0.889	0.00237332	Two-sided Wilcoxon test	0.25	5
Myl7	1.13354e-07	1.30134	0.959	0.946	0.002662	Two-sided Wilcoxon test	0.25	5
Slc16a3	1.17002e-07	-0.914081	0.224	0.491	0.00274767	Two-sided Wilcoxon test	0.25	5
Rpl35	1.17865e-07	0.658186	0.867	0.761	0.00276795	Two-sided Wilcoxon test	0.25	5
Hsp90ab1	1.23427e-07	-0.446355	1	1	0.00289855	Two-sided Wilcoxon test	0.25	5
Ndufa2	1.25783e-07	0.817599	0.643	0.404	0.00295388	Two-sided Wilcoxon test	0.25	5
Myl3	1.29845e-07	-0.583162	0.939	0.985	0.00304928	Two-sided Wilcoxon test	0.25	5
Suz12	2.07272e-07	-0.961167	0.235	0.478	0.00486757	Two-sided Wilcoxon test	0.25	5
Vcan	2.33008e-07	-0.79433	0.612	0.817	0.00547197	Two-sided Wilcoxon test	0.25	5
Rpl27	3.97679e-07	0.70232	0.98	0.911	0.0093391	Two-sided Wilcoxon test	0.25	5
4930512H18Rik	4.00795e-07	0.256342	0.122	0.017	0.00941228	Two-sided Wilcoxon test	0.25	5
Uqcrq	4.09866e-07	0.788399	0.602	0.359	0.0096253	Two-sided Wilcoxon test	0.25	5
Myl6	6.33607e-07	0.558766	0.969	0.913	0.0148796	Two-sided Wilcoxon test	0.25	5
Micos10	6.38486e-07	0.579552	0.806	0.565	0.0149942	Two-sided Wilcoxon test	0.25	5
Hsp90aa1	7.31002e-07	-0.581916	0.929	0.954	0.0171668	Two-sided Wilcoxon test	0.25	5
Nr2f2	7.36442e-07	0.44631	0.245	0.074	0.0172946	Two-sided Wilcoxon test	0.25	5
Rps21	7.61623e-07	0.709659	0.786	0.7	0.017886	Two-sided Wilcoxon test	0.25	5
Myl2	8.44564e-07	-0.466873	0.898	0.98	0.0198337	Two-sided Wilcoxon test	0.25	5
Rps18	8.50429e-07	0.565543	0.898	0.839	0.0199715	Two-sided Wilcoxon test	0.25	5
Pkm	9.15914e-07	-0.488994	0.918	0.935	0.0215093	Two-sided Wilcoxon test	0.25	5
Fth1	9.97255e-07	0.475793	0.99	0.943	0.0234195	Two-sided Wilcoxon test	0.25	5
Hectd1	1.048e-06	-0.802126	0.378	0.602	0.0246111	Two-sided Wilcoxon test	0.25	5
Uba52	1.04957e-06	0.635144	0.551	0.315	0.0246481	Two-sided Wilcoxon test	0.25	5
Pfkl	1.06858e-06	-0.767273	0.531	0.665	0.0250946	Two-sided Wilcoxon test	0.25	5
Pln	1.13108e-06	-0.872745	0.551	0.73	0.0265623	Two-sided Wilcoxon test	0.25	5
4430402I18Rik	1.17484e-06	0.172759	0.051	0	0.02759	Two-sided Wilcoxon test	0.25	5
Cox7c	1.19814e-06	0.559461	0.898	0.73	0.028137	Two-sided Wilcoxon test	0.25	5
Sec61g	1.4678e-06	0.596395	0.796	0.617	0.0344698	Two-sided Wilcoxon test	0.25	5
Rps13	1.47062e-06	0.600244	0.949	0.913	0.0345361	Two-sided Wilcoxon test	0.25	5
Ndufs6	1.47605e-06	0.605924	0.714	0.487	0.0346636	Two-sided Wilcoxon test	0.25	5
Fau	1.49257e-06	0.661808	0.969	0.941	0.0350515	Two-sided Wilcoxon test	0.25	5
Eif3a	1.73939e-06	-0.681787	0.541	0.754	0.0408477	Two-sided Wilcoxon test	0.25	5
Atp5l	1.87776e-06	0.75568	0.796	0.715	0.0440972	Two-sided Wilcoxon test	0.25	5
Rps29	1.88449e-06	0.500975	0.939	0.848	0.0442554	Two-sided Wilcoxon test	0.25	5
Stau2	1.90974e-06	0.408862	0.194	0.052	0.0448482	Two-sided Wilcoxon test	0.25	5
Gm14164	2.01549e-06	0.0822991	0.061	0.002	0.0473319	Two-sided Wilcoxon test	0.25	5
Svep1	2.01549e-06	0.125797	0.061	0.002	0.0473319	Two-sided Wilcoxon test	0.25	5
Ndufa4	2.16598e-06	0.547374	0.949	0.865	0.0508658	Two-sided Wilcoxon test	0.25	5
Rpl39	2.41443e-06	0.622357	0.908	0.859	0.0567005	Two-sided Wilcoxon test	0.25	5
Cdh11	2.63575e-06	0.456031	0.224	0.067	0.0618981	Two-sided Wilcoxon test	0.25	5
Vcp	3.19478e-06	-0.589311	0.827	0.876	0.0750263	Two-sided Wilcoxon test	0.25	5
Tpr	3.68349e-06	-0.682243	0.592	0.728	0.0865032	Two-sided Wilcoxon test	0.25	5
Cdkn1c	3.68416e-06	-0.686415	0.796	0.854	0.0865188	Two-sided Wilcoxon test	0.25	5
Pde7a	4.4449e-06	0.343719	0.184	0.05	0.104384	Two-sided Wilcoxon test	0.25	5
Erh	5.3188e-06	-0.792883	0.439	0.613	0.124907	Two-sided Wilcoxon test	0.25	5
Tln2	5.38834e-06	-0.681762	0.367	0.593	0.12654	Two-sided Wilcoxon test	0.25	5
Auts2	5.98254e-06	0.690708	0.418	0.213	0.140494	Two-sided Wilcoxon test	0.25	5
Gm26917	5.98618e-06	0.629429	0.306	0.126	0.140579	Two-sided Wilcoxon test	0.25	5
Romo1	6.01059e-06	0.430885	0.582	0.335	0.141153	Two-sided Wilcoxon test	0.25	5
Myom1	6.06697e-06	-0.701186	0.592	0.754	0.142477	Two-sided Wilcoxon test	0.25	5
Mrpl14	6.09677e-06	0.455482	0.316	0.128	0.143176	Two-sided Wilcoxon test	0.25	5
Sf3b2	6.23446e-06	-0.725952	0.5	0.665	0.14641	Two-sided Wilcoxon test	0.25	5
Rpl35a	7.07547e-06	0.752593	0.806	0.687	0.16616	Two-sided Wilcoxon test	0.25	5
Gm4258	7.20017e-06	0.406369	0.133	0.028	0.169089	Two-sided Wilcoxon test	0.25	5
Ckap5	7.26066e-06	-0.834724	0.347	0.55	0.170509	Two-sided Wilcoxon test	0.25	5
Rpl37	7.69892e-06	0.508905	0.949	0.843	0.180801	Two-sided Wilcoxon test	0.25	5
AY036118	7.8247e-06	-0.394297	1	1	0.183755	Two-sided Wilcoxon test	0.25	5
Kcnq5	7.98595e-06	0.676719	0.306	0.128	0.187542	Two-sided Wilcoxon test	0.25	5
Atp2a2	8.03052e-06	-0.462682	0.786	0.922	0.188589	Two-sided Wilcoxon test	0.25	5
Hk1	8.13419e-06	-0.736585	0.541	0.674	0.191023	Two-sided Wilcoxon test	0.25	5
Rpl27a	8.2709e-06	0.530618	0.99	0.948	0.194234	Two-sided Wilcoxon test	0.25	5
Uqcc2	8.62533e-06	0.620094	0.449	0.241	0.202557	Two-sided Wilcoxon test	0.25	5
Mapk8	8.7626e-06	0.289386	0.204	0.061	0.205781	Two-sided Wilcoxon test	0.25	5
Cox7a2	8.99128e-06	0.594915	0.837	0.687	0.211151	Two-sided Wilcoxon test	0.25	5
Prrc2c	1.01972e-05	-0.699064	0.541	0.709	0.239471	Two-sided Wilcoxon test	0.25	5
Atox1	1.1192e-05	0.735345	0.398	0.198	0.262833	Two-sided Wilcoxon test	0.25	5
Map2k4	1.27033e-05	0.497463	0.347	0.163	0.298324	Two-sided Wilcoxon test	0.25	5
Tmed9	1.28978e-05	-0.715337	0.367	0.572	0.302891	Two-sided Wilcoxon test	0.25	5
Dsp	1.29489e-05	-0.679388	0.52	0.707	0.304092	Two-sided Wilcoxon test	0.25	5
Pfdn5	1.33337e-05	0.547074	0.673	0.487	0.313129	Two-sided Wilcoxon test	0.25	5
Scd2	1.35639e-05	-0.629309	0.469	0.659	0.318535	Two-sided Wilcoxon test	0.25	5
Hspa9	1.41975e-05	-0.591739	0.724	0.798	0.333415	Two-sided Wilcoxon test	0.25	5
Tnks2	1.4363e-05	-0.676694	0.469	0.641	0.3373	Two-sided Wilcoxon test	0.25	5
Micos13	1.44834e-05	0.511596	0.571	0.339	0.340129	Two-sided Wilcoxon test	0.25	5
Rpl13a	1.49565e-05	0.497113	0.969	0.907	0.351239	Two-sided Wilcoxon test	0.25	5
Hsd3b6	1.7485e-05	0.164306	0.061	0.004	0.410618	Two-sided Wilcoxon test	0.25	5
Dnm3os	1.80209e-05	0.130345	0.061	0.004	0.423204	Two-sided Wilcoxon test	0.25	5
Hspa5	1.93563e-05	-0.541218	0.806	0.904	0.454563	Two-sided Wilcoxon test	0.25	5
Klhl9	1.97566e-05	-0.831503	0.245	0.433	0.463963	Two-sided Wilcoxon test	0.25	5
Smim26	2.04556e-05	0.301223	0.163	0.046	0.48038	Two-sided Wilcoxon test	0.25	5
Snhg15	2.07277e-05	0.169022	0.051	0.002	0.48677	Two-sided Wilcoxon test	0.25	5
Hnrnpd	2.15031e-05	-0.540402	0.643	0.726	0.504979	Two-sided Wilcoxon test	0.25	5
B230369F24Rik	2.18286e-05	0.102361	0.051	0.002	0.512624	Two-sided Wilcoxon test	0.25	5
4732471J01Rik	2.22078e-05	0.0973582	0.051	0.002	0.521528	Two-sided Wilcoxon test	0.25	5
Cox6a2	2.23327e-05	0.857156	0.612	0.43	0.524462	Two-sided Wilcoxon test	0.25	5
Rps27l	2.30209e-05	0.568483	0.653	0.467	0.540623	Two-sided Wilcoxon test	0.25	5
Tmcc1	2.47164e-05	0.434557	0.214	0.072	0.580441	Two-sided Wilcoxon test	0.25	5
Cox7b	2.58155e-05	0.54448	0.847	0.752	0.606251	Two-sided Wilcoxon test	0.25	5
Adm	2.6031e-05	0.226453	0.082	0.011	0.611312	Two-sided Wilcoxon test	0.25	5
Rps16	2.63402e-05	0.569986	0.98	0.93	0.618574	Two-sided Wilcoxon test	0.25	5
Atp5j2	2.64229e-05	0.54339	0.867	0.713	0.620514	Two-sided Wilcoxon test	0.25	5
Myl1	2.95851e-05	1.18773	0.745	0.539	0.694776	Two-sided Wilcoxon test	0.25	5
Suclg1	3.02702e-05	-0.570365	0.48	0.643	0.710864	Two-sided Wilcoxon test	0.25	5
Atp5k	3.07721e-05	0.519938	0.786	0.635	0.722652	Two-sided Wilcoxon test	0.25	5
Ndufb2	3.08565e-05	0.535814	0.531	0.324	0.724634	Two-sided Wilcoxon test	0.25	5
Parp1	3.19789e-05	-0.759849	0.286	0.47	0.750993	Two-sided Wilcoxon test	0.25	5
Nid2	3.27785e-05	-0.708701	0.184	0.383	0.769769	Two-sided Wilcoxon test	0.25	5
Rtn4	3.28889e-05	-0.615003	0.541	0.693	0.772363	Two-sided Wilcoxon test	0.25	5
Elob	3.40336e-05	0.580767	0.776	0.62	0.799244	Two-sided Wilcoxon test	0.25	5
Ndufb7	3.45042e-05	0.551193	0.694	0.517	0.810297	Two-sided Wilcoxon test	0.25	5
Pfkp	3.52242e-05	-0.663383	0.378	0.58	0.827205	Two-sided Wilcoxon test	0.25	5
Rpl23	3.52382e-05	0.526191	1	0.965	0.827534	Two-sided Wilcoxon test	0.25	5
Rpl36a	3.53501e-05	0.663791	0.827	0.733	0.830162	Two-sided Wilcoxon test	0.25	5
Bex4	3.7708e-05	0.66769	0.684	0.526	0.885534	Two-sided Wilcoxon test	0.25	5
Ndufc1	3.78709e-05	0.624825	0.663	0.522	0.889361	Two-sided Wilcoxon test	0.25	5
Pycard	3.8525e-05	0.265038	0.224	0.08	0.90472	Two-sided Wilcoxon test	0.25	5
Stard10	4.04501e-05	0.497536	0.173	0.054	0.949929	Two-sided Wilcoxon test	0.25	5
Sox6	4.18456e-05	0.404009	0.224	0.083	0.982703	Two-sided Wilcoxon test	0.25	5
Rpl28	4.20223e-05	0.451453	0.98	0.952	0.986851	Two-sided Wilcoxon test	0.25	5
Ndufb8	4.37219e-05	0.524061	0.796	0.657	1	Two-sided Wilcoxon test	0.25	5
Rpl36a-ps1	4.38178e-05	0.206291	0.102	0.02	1	Two-sided Wilcoxon test	0.25	5
Cox6c	4.67738e-05	0.5246	0.857	0.772	1	Two-sided Wilcoxon test	0.25	5
Zfp26	4.84096e-05	0.232401	0.122	0.028	1	Two-sided Wilcoxon test	0.25	5
Arnt2	4.8595e-05	0.174364	0.071	0.009	1	Two-sided Wilcoxon test	0.25	5
Serf2	4.87791e-05	0.720759	0.898	0.77	1	Two-sided Wilcoxon test	0.25	5
Zfand3	5.02061e-05	0.458504	0.469	0.259	1	Two-sided Wilcoxon test	0.25	5
Rpl9-ps6	5.15732e-05	0.213896	0.112	0.024	1	Two-sided Wilcoxon test	0.25	5
Ndufb10	5.20214e-05	0.532889	0.663	0.454	1	Two-sided Wilcoxon test	0.25	5
Osbpl10	5.23033e-05	0.145346	0.071	0.009	1	Two-sided Wilcoxon test	0.25	5
Hspa4	5.3155e-05	-0.587774	0.48	0.667	1	Two-sided Wilcoxon test	0.25	5
Mylk3	5.44964e-05	-0.576659	0.296	0.504	1	Two-sided Wilcoxon test	0.25	5
Rbx1	5.89018e-05	0.512157	0.816	0.67	1	Two-sided Wilcoxon test	0.25	5
Kcnq1ot1	5.94795e-05	0.397818	0.224	0.085	1	Two-sided Wilcoxon test	0.25	5
Eprs	6.03708e-05	-0.654164	0.5	0.633	1	Two-sided Wilcoxon test	0.25	5
Ndufa11	6.17548e-05	0.469516	0.643	0.426	1	Two-sided Wilcoxon test	0.25	5
Zfpm2	6.28053e-05	0.42995	0.337	0.159	1	Two-sided Wilcoxon test	0.25	5
Mt1	6.28671e-05	0.389502	0.582	0.33	1	Two-sided Wilcoxon test	0.25	5
Gpc6	6.39437e-05	0.582437	0.286	0.12	1	Two-sided Wilcoxon test	0.25	5
Uqcrh	6.73134e-05	0.669711	0.888	0.741	1	Two-sided Wilcoxon test	0.25	5
Tmsb10	6.85221e-05	0.660889	0.878	0.78	1	Two-sided Wilcoxon test	0.25	5
Ss18l2	6.85366e-05	0.313114	0.276	0.115	1	Two-sided Wilcoxon test	0.25	5
Glrx	7.25611e-05	0.274481	0.245	0.096	1	Two-sided Wilcoxon test	0.25	5
Ahnak	7.4706e-05	-0.664743	0.367	0.565	1	Two-sided Wilcoxon test	0.25	5
Rps10	7.87172e-05	0.496125	0.959	0.9	1	Two-sided Wilcoxon test	0.25	5
Grb10	8.02317e-05	-0.41879	0.816	0.876	1	Two-sided Wilcoxon test	0.25	5
Fmc1	8.03798e-05	0.444939	0.327	0.154	1	Two-sided Wilcoxon test	0.25	5
Nr2f1	8.12726e-05	0.374431	0.133	0.035	1	Two-sided Wilcoxon test	0.25	5
Rpl21	8.64207e-05	0.492979	0.949	0.893	1	Two-sided Wilcoxon test	0.25	5
Raf1	8.81932e-05	0.238704	0.245	0.096	1	Two-sided Wilcoxon test	0.25	5
Hnrnpf	9.01631e-05	-0.582609	0.724	0.82	1	Two-sided Wilcoxon test	0.25	5
Car2	9.049e-05	0.535052	0.337	0.167	1	Two-sided Wilcoxon test	0.25	5
Uqcr11	9.14479e-05	0.635141	0.612	0.433	1	Two-sided Wilcoxon test	0.25	5
Ogt	9.29588e-05	0.357028	0.224	0.087	1	Two-sided Wilcoxon test	0.25	5
Uhrf1bp1l	9.34455e-05	0.307315	0.194	0.067	1	Two-sided Wilcoxon test	0.25	5
Ubc	9.67038e-05	-0.534554	0.684	0.757	1	Two-sided Wilcoxon test	0.25	5
Rps27	0.00010125	0.479473	0.796	0.641	1	Two-sided Wilcoxon test	0.25	5
Cpeb3	0.000102926	0.255827	0.163	0.05	1	Two-sided Wilcoxon test	0.25	5
4632427E13Rik	0.000104202	0.0617628	0.082	0.013	1	Two-sided Wilcoxon test	0.25	5
Bmt2	0.000105405	0.283505	0.173	0.057	1	Two-sided Wilcoxon test	0.25	5
Cacnb2	0.000108753	0.52362	0.398	0.215	1	Two-sided Wilcoxon test	0.25	5
Bloc1s2	0.000110257	0.326905	0.286	0.124	1	Two-sided Wilcoxon test	0.25	5
Serinc1	0.000113398	-0.601044	0.194	0.393	1	Two-sided Wilcoxon test	0.25	5
Slc2a1	0.000113999	-0.607343	0.459	0.663	1	Two-sided Wilcoxon test	0.25	5
Ninl	0.000114339	0.150936	0.092	0.017	1	Two-sided Wilcoxon test	0.25	5
Hsp90b1	0.000116648	-0.419332	0.745	0.865	1	Two-sided Wilcoxon test	0.25	5
1810026B05Rik	0.000121511	0.377849	0.224	0.089	1	Two-sided Wilcoxon test	0.25	5
Nme2	0.00012233	0.508555	0.898	0.835	1	Two-sided Wilcoxon test	0.25	5
Abhd17b	0.000123411	0.264523	0.143	0.041	1	Two-sided Wilcoxon test	0.25	5
Snrpd2	0.000124024	0.56601	0.643	0.491	1	Two-sided Wilcoxon test	0.25	5
Atpif1	0.00012564	0.458614	0.806	0.639	1	Two-sided Wilcoxon test	0.25	5
St7	0.000128667	0.282124	0.163	0.052	1	Two-sided Wilcoxon test	0.25	5
Hand2os1	0.00013443	0.389481	0.245	0.102	1	Two-sided Wilcoxon test	0.25	5
Ppp1r14c	0.000140263	-0.654139	0.48	0.602	1	Two-sided Wilcoxon test	0.25	5
Snrpe	0.000142713	0.458432	0.755	0.641	1	Two-sided Wilcoxon test	0.25	5
Kpnb1	0.00014678	-0.577407	0.439	0.613	1	Two-sided Wilcoxon test	0.25	5
Robo1	0.000147613	0.35791	0.184	0.065	1	Two-sided Wilcoxon test	0.25	5
Lyrm2	0.000148498	0.38739	0.337	0.167	1	Two-sided Wilcoxon test	0.25	5
Card19	0.000150022	0.269724	0.235	0.093	1	Two-sided Wilcoxon test	0.25	5
Dld	0.000151561	-0.707635	0.367	0.524	1	Two-sided Wilcoxon test	0.25	5
Bola2	0.000159253	0.404767	0.245	0.104	1	Two-sided Wilcoxon test	0.25	5
Pdia6	0.000159948	-0.513074	0.673	0.8	1	Two-sided Wilcoxon test	0.25	5
Pde4d	0.000160233	0.364877	0.276	0.124	1	Two-sided Wilcoxon test	0.25	5
Ctnna1	0.000161796	-0.553287	0.561	0.711	1	Two-sided Wilcoxon test	0.25	5
Cox7a1	0.000164499	0.476126	0.286	0.135	1	Two-sided Wilcoxon test	0.25	5
Cbx5	0.000174033	-0.565152	0.643	0.752	1	Two-sided Wilcoxon test	0.25	5
Rnf150	0.000174614	0.103751	0.051	0.004	1	Two-sided Wilcoxon test	0.25	5
Fgf12	0.000175837	0.259747	0.071	0.011	1	Two-sided Wilcoxon test	0.25	5
Fabp5	0.000179876	0.311508	0.827	0.565	1	Two-sided Wilcoxon test	0.25	5
Gm45716	0.000185341	0.612667	0.418	0.259	1	Two-sided Wilcoxon test	0.25	5
Ndufa5	0.000186369	0.550953	0.724	0.557	1	Two-sided Wilcoxon test	0.25	5
Ndufa6	0.000188112	0.695026	0.541	0.385	1	Two-sided Wilcoxon test	0.25	5
H2afj	0.000197337	0.329064	0.235	0.098	1	Two-sided Wilcoxon test	0.25	5
Rims1	0.000198272	0.1113	0.071	0.011	1	Two-sided Wilcoxon test	0.25	5
Ubl5	0.00020179	0.439038	0.571	0.391	1	Two-sided Wilcoxon test	0.25	5
Dpysl3	0.000208972	-0.570146	0.388	0.539	1	Two-sided Wilcoxon test	0.25	5
Rps8	0.000209966	0.452088	1	0.983	1	Two-sided Wilcoxon test	0.25	5
Loxl2	0.000212713	-0.657801	0.102	0.267	1	Two-sided Wilcoxon test	0.25	5
Rpl22	0.000214072	0.439321	0.918	0.824	1	Two-sided Wilcoxon test	0.25	5
Atp1b1	0.000218156	-0.532061	0.582	0.733	1	Two-sided Wilcoxon test	0.25	5
Serf1	0.000227152	0.32741	0.316	0.152	1	Two-sided Wilcoxon test	0.25	5
Eif4g1	0.000229052	-0.561838	0.582	0.663	1	Two-sided Wilcoxon test	0.25	5
Alpk2	0.000230705	-0.693935	0.296	0.465	1	Two-sided Wilcoxon test	0.25	5
Pdia3	0.000235668	-0.540918	0.643	0.761	1	Two-sided Wilcoxon test	0.25	5
Pmpcb	0.000236712	-0.592319	0.194	0.365	1	Two-sided Wilcoxon test	0.25	5
Vsnl1	0.000236877	0.367209	0.082	0.015	1	Two-sided Wilcoxon test	0.25	5
Rpl10a	0.000239253	0.464661	0.969	0.943	1	Two-sided Wilcoxon test	0.25	5
Ncl	0.00024	-0.473907	0.837	0.878	1	Two-sided Wilcoxon test	0.25	5
Dock11	0.000240554	0.216445	0.102	0.024	1	Two-sided Wilcoxon test	0.25	5
Atp5a1	0.000240617	-0.351795	0.969	0.95	1	Two-sided Wilcoxon test	0.25	5
Chn1	0.000242979	0.209458	0.163	0.054	1	Two-sided Wilcoxon test	0.25	5
Lsp1	0.000244526	0.206992	0.102	0.024	1	Two-sided Wilcoxon test	0.25	5
Smim4	0.000244787	0.301192	0.194	0.074	1	Two-sided Wilcoxon test	0.25	5
Ppp1r18	0.00025584	0.175843	0.082	0.015	1	Two-sided Wilcoxon test	0.25	5
Gm1673	0.000255961	0.300079	0.214	0.085	1	Two-sided Wilcoxon test	0.25	5
Tnni3	0.000256387	0.6854	0.816	0.726	1	Two-sided Wilcoxon test	0.25	5
Igf2	0.000260929	-0.372265	0.806	0.876	1	Two-sided Wilcoxon test	0.25	5
Tgm2	0.000267709	-0.680023	0.296	0.467	1	Two-sided Wilcoxon test	0.25	5
Sparc	0.000274105	-0.463913	0.551	0.698	1	Two-sided Wilcoxon test	0.25	5
Ndufs1	0.00027562	-0.560586	0.582	0.674	1	Two-sided Wilcoxon test	0.25	5
Nop10	0.000286115	0.49422	0.561	0.372	1	Two-sided Wilcoxon test	0.25	5
Psmd2	0.000287225	-0.554805	0.459	0.613	1	Two-sided Wilcoxon test	0.25	5
Ap3b2	0.000288654	0.180274	0.092	0.02	1	Two-sided Wilcoxon test	0.25	5
Gtf2h2	0.000296679	0.299761	0.143	0.046	1	Two-sided Wilcoxon test	0.25	5
Kif5b	0.00029697	-0.557454	0.592	0.687	1	Two-sided Wilcoxon test	0.25	5
Copb2	0.000300306	-0.592998	0.398	0.541	1	Two-sided Wilcoxon test	0.25	5
Canx	0.000319908	-0.459173	0.592	0.724	1	Two-sided Wilcoxon test	0.25	5
Smad4	0.000324455	0.472394	0.347	0.187	1	Two-sided Wilcoxon test	0.25	5
Pqbp1	0.000327368	0.342434	0.204	0.083	1	Two-sided Wilcoxon test	0.25	5
Cluh	0.00034932	-0.567473	0.245	0.422	1	Two-sided Wilcoxon test	0.25	5
Igf2r	0.000369742	-0.418306	0.806	0.885	1	Two-sided Wilcoxon test	0.25	5
Chd4	0.000370974	-0.572833	0.52	0.674	1	Two-sided Wilcoxon test	0.25	5
5330438D12Rik	0.000375066	0.188885	0.153	0.05	1	Two-sided Wilcoxon test	0.25	5
Rhbdd1	0.000379387	0.177477	0.061	0.009	1	Two-sided Wilcoxon test	0.25	5
Gm16093	0.000392593	0.113334	0.061	0.009	1	Two-sided Wilcoxon test	0.25	5
Atp5g1	0.00040488	0.594176	0.857	0.817	1	Two-sided Wilcoxon test	0.25	5
Gmnn	0.000425486	-0.678813	0.265	0.424	1	Two-sided Wilcoxon test	0.25	5
Ung	0.000433824	-0.689567	0.092	0.241	1	Two-sided Wilcoxon test	0.25	5
Bad	0.000438721	0.346689	0.194	0.078	1	Two-sided Wilcoxon test	0.25	5
Zfp106	0.000446452	-0.61197	0.429	0.567	1	Two-sided Wilcoxon test	0.25	5
Dym	0.000449981	0.251233	0.153	0.052	1	Two-sided Wilcoxon test	0.25	5
Rpl17	0.00045192	0.592273	0.898	0.907	1	Two-sided Wilcoxon test	0.25	5
Ptpn12	0.000466483	0.276849	0.173	0.065	1	Two-sided Wilcoxon test	0.25	5
Lcorl	0.000471495	0.263533	0.245	0.109	1	Two-sided Wilcoxon test	0.25	5
Tcf7l2	0.00049904	0.332858	0.296	0.148	1	Two-sided Wilcoxon test	0.25	5
Kansl1l	0.000501562	0.224093	0.133	0.041	1	Two-sided Wilcoxon test	0.25	5
Ost4	0.000514416	0.347749	0.337	0.178	1	Two-sided Wilcoxon test	0.25	5
6330403K07Rik	0.000520056	0.161428	0.112	0.03	1	Two-sided Wilcoxon test	0.25	5
Cox10	0.000533897	0.307958	0.214	0.091	1	Two-sided Wilcoxon test	0.25	5
Tln1	0.000553458	-0.54863	0.51	0.63	1	Two-sided Wilcoxon test	0.25	5
Ttc9c	0.000581294	0.163207	0.153	0.052	1	Two-sided Wilcoxon test	0.25	5
Itgb3bp	0.000581312	0.199179	0.204	0.083	1	Two-sided Wilcoxon test	0.25	5
Hint2	0.000584599	0.342707	0.245	0.113	1	Two-sided Wilcoxon test	0.25	5
Pgam1	0.000607583	-0.320148	0.888	0.937	1	Two-sided Wilcoxon test	0.25	5
Lgals1	0.000609974	0.562422	0.49	0.324	1	Two-sided Wilcoxon test	0.25	5
2310009B15Rik	0.000622188	0.233992	0.143	0.048	1	Two-sided Wilcoxon test	0.25	5
Phf21a	0.000623075	0.321475	0.235	0.107	1	Two-sided Wilcoxon test	0.25	5
Supt16	0.000630705	-0.58731	0.398	0.543	1	Two-sided Wilcoxon test	0.25	5
Dph3	0.00063117	0.319616	0.286	0.139	1	Two-sided Wilcoxon test	0.25	5
Rbm4b	0.000642125	0.165522	0.122	0.037	1	Two-sided Wilcoxon test	0.25	5
Sf3b1	0.000645691	-0.537498	0.633	0.704	1	Two-sided Wilcoxon test	0.25	5
Eif4h	0.000655601	-0.468021	0.398	0.57	1	Two-sided Wilcoxon test	0.25	5
Npm1	0.00067386	-0.38191	0.939	0.983	1	Two-sided Wilcoxon test	0.25	5
Huwe1	0.000690395	-0.483563	0.551	0.689	1	Two-sided Wilcoxon test	0.25	5
Nsd1	0.00073834	-0.537933	0.408	0.552	1	Two-sided Wilcoxon test	0.25	5
Trim26	0.000743673	0.270861	0.102	0.028	1	Two-sided Wilcoxon test	0.25	5
Anxa7	0.000756041	0.177373	0.153	0.054	1	Two-sided Wilcoxon test	0.25	5
Cst3	0.000763992	-0.542328	0.531	0.678	1	Two-sided Wilcoxon test	0.25	5
Piezo2	0.000766015	0.096685	0.051	0.007	1	Two-sided Wilcoxon test	0.25	5
Mrrf	0.000770972	0.187363	0.163	0.061	1	Two-sided Wilcoxon test	0.25	5
4930484I04Rik	0.000784834	0.135206	0.051	0.007	1	Two-sided Wilcoxon test	0.25	5
Mindy4	0.000794404	0.0626709	0.051	0.007	1	Two-sided Wilcoxon test	0.25	5
Fibp	0.000797657	0.158792	0.224	0.096	1	Two-sided Wilcoxon test	0.25	5
Pcm1	0.000801187	-0.585908	0.388	0.554	1	Two-sided Wilcoxon test	0.25	5
Abcc8	0.000804082	0.077042	0.051	0.007	1	Two-sided Wilcoxon test	0.25	5
Fbxw9	0.000804082	0.0925358	0.051	0.007	1	Two-sided Wilcoxon test	0.25	5
Magi1	0.00080674	0.529397	0.367	0.215	1	Two-sided Wilcoxon test	0.25	5
Itch	0.000806983	0.306754	0.276	0.135	1	Two-sided Wilcoxon test	0.25	5
Tbc1d23	0.000823493	0.338653	0.184	0.076	1	Two-sided Wilcoxon test	0.25	5
Gm43050	0.000833775	0.0621015	0.051	0.007	1	Two-sided Wilcoxon test	0.25	5
St6galnac3	0.000875349	0.163868	0.133	0.043	1	Two-sided Wilcoxon test	0.25	5
Dhx9	0.000881127	-0.587753	0.429	0.567	1	Two-sided Wilcoxon test	0.25	5
Rpl29	0.000924092	0.443469	0.898	0.837	1	Two-sided Wilcoxon test	0.25	5
Braf	0.000944896	0.320884	0.224	0.1	1	Two-sided Wilcoxon test	0.25	5
Ciao2b	0.000952319	0.364552	0.541	0.359	1	Two-sided Wilcoxon test	0.25	5
Kdm6a	0.000957499	0.364986	0.204	0.089	1	Two-sided Wilcoxon test	0.25	5
Lig1	0.000966302	-0.545206	0.214	0.365	1	Two-sided Wilcoxon test	0.25	5
Ndufb11	0.00101195	0.383962	0.643	0.465	1	Two-sided Wilcoxon test	0.25	5
Hnrnpa0	0.00101406	-0.505925	0.51	0.628	1	Two-sided Wilcoxon test	0.25	5
Wdr20	0.00102088	0.179657	0.122	0.039	1	Two-sided Wilcoxon test	0.25	5
Ago2	0.00102132	-0.507108	0.327	0.483	1	Two-sided Wilcoxon test	0.25	5
E130307A14Rik	0.00103628	0.22918	0.092	0.024	1	Two-sided Wilcoxon test	0.25	5
Phactr2	0.00104675	-0.530162	0.204	0.367	1	Two-sided Wilcoxon test	0.25	5
Bcar3	0.00104897	0.224952	0.061	0.011	1	Two-sided Wilcoxon test	0.25	5
Polr3c	0.00105927	0.153052	0.143	0.05	1	Two-sided Wilcoxon test	0.25	5
Crip1	0.0010734	0.49206	0.429	0.272	1	Two-sided Wilcoxon test	0.25	5
Eif3k	0.00107968	0.456729	0.643	0.472	1	Two-sided Wilcoxon test	0.25	5
E130310I04Rik	0.00108136	0.166418	0.061	0.011	1	Two-sided Wilcoxon test	0.25	5
Lpgat1	0.00108421	-0.573387	0.204	0.348	1	Two-sided Wilcoxon test	0.25	5
Cox8a	0.00108443	0.382758	0.878	0.863	1	Two-sided Wilcoxon test	0.25	5
Phpt1	0.0010977	0.324266	0.337	0.183	1	Two-sided Wilcoxon test	0.25	5
Hoxb4	0.00110347	0.15717	0.061	0.011	1	Two-sided Wilcoxon test	0.25	5
Cwf19l1	0.00110347	0.106051	0.061	0.011	1	Two-sided Wilcoxon test	0.25	5
Hmcn1	0.00110649	0.357597	0.224	0.104	1	Two-sided Wilcoxon test	0.25	5
Mdk	0.0011081	-0.382153	0.643	0.789	1	Two-sided Wilcoxon test	0.25	5
Morf4l1	0.00112443	0.336169	0.847	0.698	1	Two-sided Wilcoxon test	0.25	5
Unc45b	0.00112655	-0.491111	0.663	0.72	1	Two-sided Wilcoxon test	0.25	5
Rpl12	0.00113222	0.451824	0.959	0.935	1	Two-sided Wilcoxon test	0.25	5
Immt	0.00114167	-0.481692	0.643	0.713	1	Two-sided Wilcoxon test	0.25	5
Vldlr	0.00114791	-0.494357	0.041	0.165	1	Two-sided Wilcoxon test	0.25	5
Mt3	0.00114895	0.151121	0.061	0.011	1	Two-sided Wilcoxon test	0.25	5
Cemip2	0.0011542	-0.610103	0.112	0.248	1	Two-sided Wilcoxon test	0.25	5
Gmppa	0.00116058	0.10599	0.061	0.011	1	Two-sided Wilcoxon test	0.25	5
Selenof	0.00116452	-0.611657	0.306	0.446	1	Two-sided Wilcoxon test	0.25	5
Phlpp1	0.00117138	0.322516	0.224	0.104	1	Two-sided Wilcoxon test	0.25	5
Dmpk	0.00117233	0.248554	0.061	0.011	1	Two-sided Wilcoxon test	0.25	5
Lrrc4	0.00117419	0.237176	0.071	0.015	1	Two-sided Wilcoxon test	0.25	5
Pitpna	0.00118331	0.318731	0.388	0.233	1	Two-sided Wilcoxon test	0.25	5
Nutf2-ps1	0.00118572	0.138922	0.143	0.05	1	Two-sided Wilcoxon test	0.25	5
Prox1	0.0011897	-0.518623	0.153	0.3	1	Two-sided Wilcoxon test	0.25	5
Fam172a	0.00120224	0.239142	0.265	0.13	1	Two-sided Wilcoxon test	0.25	5
Cacna1c	0.00121554	0.888842	0.388	0.246	1	Two-sided Wilcoxon test	0.25	5
Syne1	0.001219	-0.627846	0.071	0.207	1	Two-sided Wilcoxon test	0.25	5
Shroom4	0.00123272	0.135637	0.061	0.011	1	Two-sided Wilcoxon test	0.25	5
2410006H16Rik	0.00124338	0.279997	0.224	0.102	1	Two-sided Wilcoxon test	0.25	5
Tshz3	0.00124514	0.103428	0.061	0.011	1	Two-sided Wilcoxon test	0.25	5
3110056K07Rik	0.00125767	0.0522195	0.061	0.011	1	Two-sided Wilcoxon test	0.25	5
Ints6l	0.0012607	0.116704	0.092	0.024	1	Two-sided Wilcoxon test	0.25	5
Smchd1	0.00126982	-0.54952	0.357	0.493	1	Two-sided Wilcoxon test	0.25	5
Pkn3	0.00127032	0.0696898	0.061	0.011	1	Two-sided Wilcoxon test	0.25	5
Rragd	0.00127911	-0.490418	0.286	0.435	1	Two-sided Wilcoxon test	0.25	5
Ube2l6	0.00128367	0.166231	0.071	0.015	1	Two-sided Wilcoxon test	0.25	5
Nexn	0.00129603	-0.37754	0.796	0.83	1	Two-sided Wilcoxon test	0.25	5
Slit3	0.00129925	0.340339	0.173	0.072	1	Two-sided Wilcoxon test	0.25	5
5530601H04Rik	0.00130023	0.136515	0.082	0.02	1	Two-sided Wilcoxon test	0.25	5
Gspt1	0.00130237	-0.518354	0.408	0.548	1	Two-sided Wilcoxon test	0.25	5
Cox5b	0.00130424	0.431113	0.776	0.641	1	Two-sided Wilcoxon test	0.25	5
Rcan1	0.00130618	-0.488286	0.133	0.285	1	Two-sided Wilcoxon test	0.25	5
Gm42418	0.0013376	-0.19228	1	1	1	Two-sided Wilcoxon test	0.25	5
Fars2	0.00133933	0.290589	0.265	0.133	1	Two-sided Wilcoxon test	0.25	5
Cklf	0.00134187	0.0921787	0.071	0.015	1	Two-sided Wilcoxon test	0.25	5
Rheb	0.00134987	-0.44306	0.418	0.57	1	Two-sided Wilcoxon test	0.25	5
Dnmt3a	0.00136337	-0.521713	0.347	0.498	1	Two-sided Wilcoxon test	0.25	5
Emg1	0.00137185	0.233562	0.418	0.243	1	Two-sided Wilcoxon test	0.25	5
Sos2	0.00138509	0.3021	0.122	0.041	1	Two-sided Wilcoxon test	0.25	5
Ftx	0.00140251	0.0859569	0.071	0.015	1	Two-sided Wilcoxon test	0.25	5
Tomm6	0.0014151	0.530339	0.48	0.335	1	Two-sided Wilcoxon test	0.25	5
Snapc5	0.00142137	0.182916	0.173	0.07	1	Two-sided Wilcoxon test	0.25	5
Csnk1g1	0.00143219	0.350662	0.163	0.065	1	Two-sided Wilcoxon test	0.25	5
Zfp748	0.00144009	0.0892804	0.071	0.015	1	Two-sided Wilcoxon test	0.25	5
Pi4kb	0.00146276	0.129479	0.112	0.035	1	Two-sided Wilcoxon test	0.25	5
Zswim6	0.00152915	0.182586	0.143	0.052	1	Two-sided Wilcoxon test	0.25	5
Herc2	0.00153165	-0.4915	0.122	0.263	1	Two-sided Wilcoxon test	0.25	5
Rfx3	0.00153463	0.224593	0.153	0.059	1	Two-sided Wilcoxon test	0.25	5
Adnp	0.00155206	-0.513632	0.418	0.522	1	Two-sided Wilcoxon test	0.25	5
Mest	0.00155334	-0.553218	0.684	0.767	1	Two-sided Wilcoxon test	0.25	5
Mt2	0.00161003	0.308554	0.163	0.065	1	Two-sided Wilcoxon test	0.25	5
Tab3	0.00172782	0.173019	0.122	0.041	1	Two-sided Wilcoxon test	0.25	5
Tmem258	0.00174625	0.33429	0.633	0.463	1	Two-sided Wilcoxon test	0.25	5
Ppp1r10	0.00175547	0.241907	0.255	0.126	1	Two-sided Wilcoxon test	0.25	5
Ccdc34	0.00177665	0.353928	0.378	0.224	1	Two-sided Wilcoxon test	0.25	5
Tgfb1i1	0.00179339	0.340048	0.337	0.189	1	Two-sided Wilcoxon test	0.25	5
Mdc1	0.00180507	-0.571902	0.102	0.235	1	Two-sided Wilcoxon test	0.25	5
Maml2	0.00181071	0.389602	0.163	0.067	1	Two-sided Wilcoxon test	0.25	5
Tbl3	0.00184383	0.171308	0.122	0.041	1	Two-sided Wilcoxon test	0.25	5
Bzw1	0.0018618	-0.560566	0.602	0.654	1	Two-sided Wilcoxon test	0.25	5
Nrap	0.00186897	-0.43756	0.031	0.141	1	Two-sided Wilcoxon test	0.25	5
Mrpl30	0.00189921	0.378799	0.429	0.27	1	Two-sided Wilcoxon test	0.25	5
Nr6a1	0.00194412	0.123735	0.092	0.026	1	Two-sided Wilcoxon test	0.25	5
Nudc	0.00195889	-0.498549	0.5	0.624	1	Two-sided Wilcoxon test	0.25	5
Kansl1	0.0019627	0.7252	0.235	0.124	1	Two-sided Wilcoxon test	0.25	5
Atp5j	0.00197171	0.347092	0.816	0.767	1	Two-sided Wilcoxon test	0.25	5
Blvrb	0.0019726	0.315803	0.276	0.143	1	Two-sided Wilcoxon test	0.25	5
Nap1l1	0.00198134	-0.439486	0.602	0.733	1	Two-sided Wilcoxon test	0.25	5
Hist1h1b	0.00201243	-0.481258	0.306	0.45	1	Two-sided Wilcoxon test	0.25	5
Mrps33	0.00202056	0.315747	0.469	0.302	1	Two-sided Wilcoxon test	0.25	5
Pcid2	0.00202539	0.0950891	0.122	0.041	1	Two-sided Wilcoxon test	0.25	5
Pum3	0.00202769	0.4707	0.316	0.178	1	Two-sided Wilcoxon test	0.25	5
Polr2j	0.00204962	0.290809	0.418	0.25	1	Two-sided Wilcoxon test	0.25	5
Pgam2	0.00206625	0.650847	0.663	0.539	1	Two-sided Wilcoxon test	0.25	5
Aff2	0.00207028	0.187786	0.184	0.078	1	Two-sided Wilcoxon test	0.25	5
Dst	0.00207691	-0.598353	0.49	0.589	1	Two-sided Wilcoxon test	0.25	5
Ap3s1	0.00208895	0.351642	0.214	0.104	1	Two-sided Wilcoxon test	0.25	5
2310039H08Rik	0.00213139	0.181401	0.173	0.072	1	Two-sided Wilcoxon test	0.25	5
Chchd6	0.00216176	0.165938	0.143	0.054	1	Two-sided Wilcoxon test	0.25	5
Ptpn4	0.0021696	0.191038	0.153	0.061	1	Two-sided Wilcoxon test	0.25	5
Lrrtm3	0.00218998	0.247236	0.133	0.048	1	Two-sided Wilcoxon test	0.25	5
Hdlbp	0.00219757	-0.461486	0.571	0.639	1	Two-sided Wilcoxon test	0.25	5
Nck2	0.00220452	0.216864	0.122	0.043	1	Two-sided Wilcoxon test	0.25	5
Gm47283	0.00222021	0.199161	0.112	0.037	1	Two-sided Wilcoxon test	0.25	5
Xirp1	0.00223463	-0.522599	0.296	0.433	1	Two-sided Wilcoxon test	0.25	5
Flnc	0.00223994	-0.365148	0.541	0.68	1	Two-sided Wilcoxon test	0.25	5
Vps72	0.00224092	0.202864	0.255	0.126	1	Two-sided Wilcoxon test	0.25	5
Hint1	0.00226826	0.470705	0.765	0.687	1	Two-sided Wilcoxon test	0.25	5
Mthfd2l	0.00228177	0.22259	0.163	0.067	1	Two-sided Wilcoxon test	0.25	5
Spcs2	0.00232013	-0.54381	0.5	0.58	1	Two-sided Wilcoxon test	0.25	5
Rab3a	0.00232885	0.17418	0.082	0.022	1	Two-sided Wilcoxon test	0.25	5
Atp5b	0.00233749	-0.308049	0.98	0.961	1	Two-sided Wilcoxon test	0.25	5
Svil	0.00239501	-0.391845	0.5	0.687	1	Two-sided Wilcoxon test	0.25	5
mt-Nd4l	0.00240248	0.606089	0.837	0.874	1	Two-sided Wilcoxon test	0.25	5
Azin1	0.00241104	-0.386687	0.388	0.517	1	Two-sided Wilcoxon test	0.25	5
Hspa8	0.00241118	-0.284349	0.949	0.976	1	Two-sided Wilcoxon test	0.25	5
Tcf12	0.00241235	0.337139	0.327	0.191	1	Two-sided Wilcoxon test	0.25	5
Mef2c	0.00241334	-0.597571	0.347	0.467	1	Two-sided Wilcoxon test	0.25	5
Abcf1	0.00243463	-0.544514	0.337	0.47	1	Two-sided Wilcoxon test	0.25	5
Sf3a2	0.00243832	0.269895	0.173	0.076	1	Two-sided Wilcoxon test	0.25	5
Smarca4	0.00244043	-0.510493	0.306	0.435	1	Two-sided Wilcoxon test	0.25	5
Ankrd1	0.00248683	0.3904	0.755	0.6	1	Two-sided Wilcoxon test	0.25	5
Tsr2	0.00249822	0.221892	0.102	0.033	1	Two-sided Wilcoxon test	0.25	5
Large1	0.00250928	0.184767	0.163	0.067	1	Two-sided Wilcoxon test	0.25	5
Plagl1	0.00251545	-0.54205	0.316	0.459	1	Two-sided Wilcoxon test	0.25	5
Slc30a9	0.00252717	-0.507306	0.163	0.298	1	Two-sided Wilcoxon test	0.25	5
Pdlim7	0.00253065	0.467024	0.551	0.426	1	Two-sided Wilcoxon test	0.25	5
Ccl27a	0.00254095	0.222503	0.071	0.017	1	Two-sided Wilcoxon test	0.25	5
Papolg	0.00254717	0.0823878	0.082	0.022	1	Two-sided Wilcoxon test	0.25	5
Hnrnpa1	0.00254857	-0.471836	0.694	0.77	1	Two-sided Wilcoxon test	0.25	5
Gab2	0.00255565	0.206755	0.122	0.043	1	Two-sided Wilcoxon test	0.25	5
Itfg2	0.00256255	0.243335	0.102	0.033	1	Two-sided Wilcoxon test	0.25	5
Alpk3	0.00258511	-0.521559	0.245	0.393	1	Two-sided Wilcoxon test	0.25	5
Hdac8	0.00258533	0.131502	0.082	0.022	1	Two-sided Wilcoxon test	0.25	5
Sptan1	0.00258897	-0.434439	0.337	0.478	1	Two-sided Wilcoxon test	0.25	5
Hist3h2ba	0.00259528	0.203164	0.102	0.033	1	Two-sided Wilcoxon test	0.25	5
Serbp1	0.00259571	-0.364688	0.857	0.9	1	Two-sided Wilcoxon test	0.25	5
Ndufv3	0.00259908	0.422491	0.5	0.337	1	Two-sided Wilcoxon test	0.25	5
Rhod	0.00261178	0.187901	0.102	0.033	1	Two-sided Wilcoxon test	0.25	5
Snhg4	0.00261827	0.263545	0.133	0.05	1	Two-sided Wilcoxon test	0.25	5
Wnt2	0.002624	0.153199	0.082	0.022	1	Two-sided Wilcoxon test	0.25	5
Ypel5	0.00263227	0.20735	0.133	0.05	1	Two-sided Wilcoxon test	0.25	5
Dpp6	0.00264694	0.133754	0.051	0.009	1	Two-sided Wilcoxon test	0.25	5
Psmg4	0.00265625	0.208463	0.224	0.109	1	Two-sided Wilcoxon test	0.25	5
Gli2	0.0026746	0.136038	0.051	0.009	1	Two-sided Wilcoxon test	0.25	5
Dusp23	0.0026746	0.0754364	0.051	0.009	1	Two-sided Wilcoxon test	0.25	5
A830082K12Rik	0.0026746	0.0794723	0.051	0.009	1	Two-sided Wilcoxon test	0.25	5
Col4a1	0.00267877	-0.526556	0.357	0.493	1	Two-sided Wilcoxon test	0.25	5
Pdzd8	0.00269354	-0.34914	0.102	0.235	1	Two-sided Wilcoxon test	0.25	5
Rec8	0.00270253	0.120733	0.051	0.009	1	Two-sided Wilcoxon test	0.25	5
Xlr5a	0.00271119	0.18624	0.071	0.017	1	Two-sided Wilcoxon test	0.25	5
2810030D12Rik	0.00273072	0.0717608	0.051	0.009	1	Two-sided Wilcoxon test	0.25	5
Rcbtb1	0.00274976	0.141852	0.122	0.043	1	Two-sided Wilcoxon test	0.25	5
Rimklb	0.00276357	0.133302	0.082	0.022	1	Two-sided Wilcoxon test	0.25	5
Mrpl52	0.0027827	0.330719	0.429	0.28	1	Two-sided Wilcoxon test	0.25	5
Rpl36al	0.00279108	0.37245	0.816	0.661	1	Two-sided Wilcoxon test	0.25	5
Sik2	0.00279981	0.159313	0.102	0.033	1	Two-sided Wilcoxon test	0.25	5
Enox2	0.00280015	0.127319	0.071	0.017	1	Two-sided Wilcoxon test	0.25	5
Smc2	0.00281679	-0.555534	0.378	0.498	1	Two-sided Wilcoxon test	0.25	5
Manf	0.00284465	-0.457701	0.622	0.722	1	Two-sided Wilcoxon test	0.25	5
Ephb2	0.00289814	0.145222	0.061	0.013	1	Two-sided Wilcoxon test	0.25	5
Mrps21	0.00291929	0.331388	0.408	0.252	1	Two-sided Wilcoxon test	0.25	5
Rfxank	0.00295051	0.100181	0.061	0.013	1	Two-sided Wilcoxon test	0.25	5
Hmgcs1	0.00296297	-0.612295	0.418	0.552	1	Two-sided Wilcoxon test	0.25	5
2210408I21Rik	0.00298138	0.151478	0.102	0.033	1	Two-sided Wilcoxon test	0.25	5
Glg1	0.00301486	-0.503142	0.255	0.393	1	Two-sided Wilcoxon test	0.25	5
Ddr1	0.0030171	-0.522942	0.286	0.417	1	Two-sided Wilcoxon test	0.25	5
Txn2	0.00301818	0.377663	0.347	0.213	1	Two-sided Wilcoxon test	0.25	5
Spaca6	0.00303068	0.11216	0.061	0.013	1	Two-sided Wilcoxon test	0.25	5
Camk1d	0.00305219	-0.333088	0.786	0.843	1	Two-sided Wilcoxon test	0.25	5
Chfr	0.00307361	0.197856	0.143	0.057	1	Two-sided Wilcoxon test	0.25	5
Prrx1	0.00311481	0.122246	0.102	0.033	1	Two-sided Wilcoxon test	0.25	5
Ndrg2	0.00312948	-0.537837	0.173	0.304	1	Two-sided Wilcoxon test	0.25	5
Ddr2	0.00314067	0.0917052	0.061	0.013	1	Two-sided Wilcoxon test	0.25	5
Naa38	0.00314446	0.183912	0.204	0.093	1	Two-sided Wilcoxon test	0.25	5
Aak1	0.00314738	0.260503	0.286	0.154	1	Two-sided Wilcoxon test	0.25	5
Dynll1	0.0031792	0.48694	0.888	0.885	1	Two-sided Wilcoxon test	0.25	5
Mau2	0.00318286	0.290531	0.133	0.052	1	Two-sided Wilcoxon test	0.25	5
Ppp1r21	0.0032061	0.202821	0.092	0.028	1	Two-sided Wilcoxon test	0.25	5
Bloc1s1	0.00321342	0.0875099	0.102	0.033	1	Two-sided Wilcoxon test	0.25	5
Clasp2	0.00322171	0.230291	0.184	0.085	1	Two-sided Wilcoxon test	0.25	5
Cd81	0.00322664	-0.309644	0.561	0.687	1	Two-sided Wilcoxon test	0.25	5
Hey1	0.00325428	0.0915378	0.061	0.013	1	Two-sided Wilcoxon test	0.25	5
Golgb1	0.00326486	-0.484572	0.143	0.28	1	Two-sided Wilcoxon test	0.25	5
Cog3	0.00327395	0.101309	0.102	0.033	1	Two-sided Wilcoxon test	0.25	5
Jpt1	0.00328991	0.378442	0.643	0.487	1	Two-sided Wilcoxon test	0.25	5
Pkp4	0.00329688	0.404939	0.306	0.178	1	Two-sided Wilcoxon test	0.25	5
Rapgef1	0.00332646	0.271167	0.163	0.072	1	Two-sided Wilcoxon test	0.25	5
Pbx3	0.00334076	0.343246	0.265	0.141	1	Two-sided Wilcoxon test	0.25	5
Gpr22	0.00335216	-0.358619	0.02	0.117	1	Two-sided Wilcoxon test	0.25	5
Eif5a	0.00337476	-0.382063	0.714	0.826	1	Two-sided Wilcoxon test	0.25	5
Dicer1	0.00340106	-0.510602	0.286	0.407	1	Two-sided Wilcoxon test	0.25	5
Creb5	0.00342699	0.322816	0.153	0.065	1	Two-sided Wilcoxon test	0.25	5
Eif5	0.00344174	-0.452502	0.704	0.754	1	Two-sided Wilcoxon test	0.25	5
Adgrl3	0.00346728	0.37727	0.184	0.087	1	Two-sided Wilcoxon test	0.25	5
Top2a	0.00348738	-0.851031	0.408	0.513	1	Two-sided Wilcoxon test	0.25	5
Ptpn1	0.00352157	-0.381319	0.112	0.248	1	Two-sided Wilcoxon test	0.25	5
Dhps	0.00353519	0.184546	0.184	0.083	1	Two-sided Wilcoxon test	0.25	5
Psph	0.00355957	0.136751	0.173	0.074	1	Two-sided Wilcoxon test	0.25	5
Ftsj3	0.00357302	-0.416849	0.092	0.215	1	Two-sided Wilcoxon test	0.25	5
Taco1	0.00360808	0.65654	0.163	0.072	1	Two-sided Wilcoxon test	0.25	5
Aopep	0.00362459	0.188923	0.173	0.076	1	Two-sided Wilcoxon test	0.25	5
Bbip1	0.00368371	0.284819	0.224	0.113	1	Two-sided Wilcoxon test	0.25	5
Fstl1	0.00369263	-0.438855	0.459	0.589	1	Two-sided Wilcoxon test	0.25	5
Zfp579	0.00372949	0.159871	0.092	0.028	1	Two-sided Wilcoxon test	0.25	5
Birc6	0.00373699	-0.424112	0.398	0.537	1	Two-sided Wilcoxon test	0.25	5
Supt3	0.00379033	0.249049	0.133	0.052	1	Two-sided Wilcoxon test	0.25	5
Impact	0.0038025	0.285645	0.224	0.113	1	Two-sided Wilcoxon test	0.25	5
Pstk	0.00386048	0.218699	0.224	0.111	1	Two-sided Wilcoxon test	0.25	5
Lamc1	0.00387436	-0.420488	0.255	0.409	1	Two-sided Wilcoxon test	0.25	5
Mbd5	0.00389346	0.16641	0.204	0.096	1	Two-sided Wilcoxon test	0.25	5
Ncald	0.00390355	0.112594	0.092	0.028	1	Two-sided Wilcoxon test	0.25	5
Trio	0.00390513	0.258449	0.245	0.128	1	Two-sided Wilcoxon test	0.25	5
Timmdc1	0.00392609	0.234818	0.184	0.085	1	Two-sided Wilcoxon test	0.25	5
Lbh	0.0039719	-0.462294	0.367	0.509	1	Two-sided Wilcoxon test	0.25	5
Ppp2r2d	0.00397924	0.0816756	0.194	0.089	1	Two-sided Wilcoxon test	0.25	5
Tmem256	0.00399026	0.338847	0.306	0.178	1	Two-sided Wilcoxon test	0.25	5
Afp	0.00401328	0.262571	0.122	0.046	1	Two-sided Wilcoxon test	0.25	5
Tipin	0.00405616	-0.531363	0.194	0.32	1	Two-sided Wilcoxon test	0.25	5
Ints14	0.00406974	0.206698	0.133	0.052	1	Two-sided Wilcoxon test	0.25	5
Ctnna3	0.00409408	0.731504	0.388	0.248	1	Two-sided Wilcoxon test	0.25	5
Hdac9	0.0041162	0.240273	0.214	0.104	1	Two-sided Wilcoxon test	0.25	5
Rmc1	0.00419672	0.196423	0.082	0.024	1	Two-sided Wilcoxon test	0.25	5
Gng11	0.00421153	0.21802	0.276	0.148	1	Two-sided Wilcoxon test	0.25	5
Mrps18c	0.00421613	0.26655	0.367	0.222	1	Two-sided Wilcoxon test	0.25	5
B3gat3	0.00423733	0.189601	0.163	0.072	1	Two-sided Wilcoxon test	0.25	5
Capn6	0.00433687	-0.522945	0.245	0.372	1	Two-sided Wilcoxon test	0.25	5
Prkar1a	0.00434224	-0.330868	0.52	0.633	1	Two-sided Wilcoxon test	0.25	5
Fbxl5	0.00435873	0.182709	0.173	0.078	1	Two-sided Wilcoxon test	0.25	5
A630012P03Rik	0.0043746	0.120497	0.082	0.024	1	Two-sided Wilcoxon test	0.25	5
5430431A17Rik	0.00442509	0.186068	0.337	0.202	1	Two-sided Wilcoxon test	0.25	5
Rwdd1	0.00445887	0.321861	0.429	0.278	1	Two-sided Wilcoxon test	0.25	5
Tmem241	0.00449695	0.154941	0.082	0.024	1	Two-sided Wilcoxon test	0.25	5
Zbtb2	0.00452802	0.126492	0.082	0.024	1	Two-sided Wilcoxon test	0.25	5
Ankib1	0.00453279	0.326	0.173	0.08	1	Two-sided Wilcoxon test	0.25	5
Gng12	0.00453822	0.232404	0.265	0.146	1	Two-sided Wilcoxon test	0.25	5
Kirrel	0.00457697	0.23751	0.112	0.041	1	Two-sided Wilcoxon test	0.25	5
Sh3bp5	0.00459592	-0.378778	0.051	0.159	1	Two-sided Wilcoxon test	0.25	5
Ranbp2	0.00466525	-0.501511	0.316	0.437	1	Two-sided Wilcoxon test	0.25	5
Cep85l	0.00468818	0.139081	0.102	0.035	1	Two-sided Wilcoxon test	0.25	5
Pcyt1a	0.00471815	0.138193	0.214	0.104	1	Two-sided Wilcoxon test	0.25	5
Wwox	0.00472172	0.227113	0.122	0.048	1	Two-sided Wilcoxon test	0.25	5
Zcchc7	0.00474308	0.186113	0.224	0.111	1	Two-sided Wilcoxon test	0.25	5
Atp7a	0.00475719	0.236935	0.112	0.041	1	Two-sided Wilcoxon test	0.25	5
Hist1h2an	0.00482077	0.247142	0.122	0.048	1	Two-sided Wilcoxon test	0.25	5
Cpne5	0.00482742	0.165887	0.143	0.059	1	Two-sided Wilcoxon test	0.25	5
Mrpl18	0.00484911	-0.440281	0.48	0.574	1	Two-sided Wilcoxon test	0.25	5
Rbmx	0.00485774	0.255464	0.224	0.115	1	Two-sided Wilcoxon test	0.25	5
Tmem223	0.00487022	0.334798	0.327	0.196	1	Two-sided Wilcoxon test	0.25	5
Mrpl20	0.00487537	0.304628	0.439	0.296	1	Two-sided Wilcoxon test	0.25	5
Gramd1a	0.00488284	0.209446	0.082	0.024	1	Two-sided Wilcoxon test	0.25	5
Metap1d	0.0048895	0.225421	0.071	0.02	1	Two-sided Wilcoxon test	0.25	5
1110008P14Rik	0.00492022	0.232656	0.184	0.087	1	Two-sided Wilcoxon test	0.25	5
Ndufb1-ps	0.00495143	0.270797	0.418	0.261	1	Two-sided Wilcoxon test	0.25	5
Psd3	0.0049567	0.163994	0.214	0.107	1	Two-sided Wilcoxon test	0.25	5
Cpxm1	0.00499953	0.186013	0.071	0.02	1	Two-sided Wilcoxon test	0.25	5
Gtf3c1	0.00501027	-0.44349	0.204	0.339	1	Two-sided Wilcoxon test	0.25	5
Acyp1	0.00502189	0.251839	0.235	0.122	1	Two-sided Wilcoxon test	0.25	5
Actn2	0.00503306	-0.368963	0.776	0.822	1	Two-sided Wilcoxon test	0.25	5
Yaf2	0.00508432	0.236826	0.388	0.246	1	Two-sided Wilcoxon test	0.25	5
Hnrnpk	0.0051159	-0.369173	0.786	0.826	1	Two-sided Wilcoxon test	0.25	5
Ktn1	0.00512125	-0.397262	0.469	0.596	1	Two-sided Wilcoxon test	0.25	5
Rab3gap1	0.00517922	0.227039	0.286	0.161	1	Two-sided Wilcoxon test	0.25	5
Dock7	0.00521448	0.164158	0.276	0.15	1	Two-sided Wilcoxon test	0.25	5
Leprot	0.0052776	-0.437251	0.112	0.235	1	Two-sided Wilcoxon test	0.25	5
Bola3	0.00530426	0.30781	0.439	0.289	1	Two-sided Wilcoxon test	0.25	5
Naaladl2	0.00530479	0.188256	0.092	0.03	1	Two-sided Wilcoxon test	0.25	5
Cox17	0.00530948	0.349597	0.357	0.226	1	Two-sided Wilcoxon test	0.25	5
Elp4	0.00538373	0.189318	0.173	0.078	1	Two-sided Wilcoxon test	0.25	5
Smc1a	0.0054112	-0.490661	0.337	0.459	1	Two-sided Wilcoxon test	0.25	5
Ube3a	0.00541194	-0.512637	0.49	0.554	1	Two-sided Wilcoxon test	0.25	5
Elk3	0.00542239	0.132135	0.071	0.02	1	Two-sided Wilcoxon test	0.25	5
Cdk14	0.00544207	0.245016	0.265	0.146	1	Two-sided Wilcoxon test	0.25	5
Hk2	0.00548673	-0.605605	0.357	0.476	1	Two-sided Wilcoxon test	0.25	5
Adrm1	0.00548945	0.179163	0.265	0.141	1	Two-sided Wilcoxon test	0.25	5
Gapvd1	0.0054922	-0.534635	0.173	0.293	1	Two-sided Wilcoxon test	0.25	5
Fzd1	0.00551401	0.164852	0.112	0.041	1	Two-sided Wilcoxon test	0.25	5
Fancm	0.00553657	-0.356781	0.031	0.126	1	Two-sided Wilcoxon test	0.25	5
Magi3	0.00554772	0.22117	0.306	0.178	1	Two-sided Wilcoxon test	0.25	5
Asna1	0.00555247	0.23616	0.235	0.124	1	Two-sided Wilcoxon test	0.25	5
Hspe1	0.00559823	0.27932	0.816	0.693	1	Two-sided Wilcoxon test	0.25	5
Cdh6	0.00562506	0.118551	0.071	0.02	1	Two-sided Wilcoxon test	0.25	5
Atf3	0.00564163	0.215831	0.184	0.087	1	Two-sided Wilcoxon test	0.25	5
Pop5	0.00579577	0.179017	0.173	0.08	1	Two-sided Wilcoxon test	0.25	5
Lman1	0.00581995	-0.449135	0.347	0.478	1	Two-sided Wilcoxon test	0.25	5
F2r	0.00583146	-0.411471	0.061	0.165	1	Two-sided Wilcoxon test	0.25	5
Arhgap42	0.00583454	0.0992614	0.071	0.02	1	Two-sided Wilcoxon test	0.25	5
Strada	0.00592029	0.0779282	0.071	0.02	1	Two-sided Wilcoxon test	0.25	5
Atp5h	0.00593016	0.401939	0.878	0.774	1	Two-sided Wilcoxon test	0.25	5
Klhdc3	0.00597566	0.234185	0.163	0.076	1	Two-sided Wilcoxon test	0.25	5
Myo18a	0.00599407	-0.417552	0.367	0.5	1	Two-sided Wilcoxon test	0.25	5
Pcdh18	0.00605103	0.0858197	0.071	0.02	1	Two-sided Wilcoxon test	0.25	5
Rexo1	0.00611389	-0.433024	0.102	0.22	1	Two-sided Wilcoxon test	0.25	5
Myo18b	0.00613248	-0.496143	0.286	0.411	1	Two-sided Wilcoxon test	0.25	5
Mmachc	0.00613964	0.0167238	0.071	0.02	1	Two-sided Wilcoxon test	0.25	5
Lmo7	0.0061679	-0.541406	0.378	0.478	1	Two-sided Wilcoxon test	0.25	5
Mertk	0.00616799	0.155883	0.051	0.011	1	Two-sided Wilcoxon test	0.25	5
Negr1	0.00622456	0.390894	0.051	0.011	1	Two-sided Wilcoxon test	0.25	5
Gkap1	0.00622788	0.265943	0.245	0.133	1	Two-sided Wilcoxon test	0.25	5
Cops3	0.00625611	0.216875	0.439	0.276	1	Two-sided Wilcoxon test	0.25	5
Rad50	0.00632541	-0.534087	0.133	0.25	1	Two-sided Wilcoxon test	0.25	5
Dnajb5	0.00633909	0.172959	0.051	0.011	1	Two-sided Wilcoxon test	0.25	5
Sirt7	0.00635022	0.193656	0.102	0.037	1	Two-sided Wilcoxon test	0.25	5
Msra	0.00641207	0.0785113	0.112	0.041	1	Two-sided Wilcoxon test	0.25	5
Gm28376	0.00645552	0.124943	0.051	0.011	1	Two-sided Wilcoxon test	0.25	5
Nfia	0.0064762	0.29168	0.265	0.152	1	Two-sided Wilcoxon test	0.25	5
Hacd3	0.00657298	0.18441	0.143	0.061	1	Two-sided Wilcoxon test	0.25	5
Topbp1	0.00658785	-0.515285	0.235	0.359	1	Two-sided Wilcoxon test	0.25	5
1110038B12Rik	0.00659129	0.178768	0.194	0.093	1	Two-sided Wilcoxon test	0.25	5
Dda1	0.00659149	0.210674	0.224	0.12	1	Two-sided Wilcoxon test	0.25	5
Pde4b	0.00660302	0.363711	0.214	0.113	1	Two-sided Wilcoxon test	0.25	5
Mtmr10	0.00660382	0.0754994	0.061	0.015	1	Two-sided Wilcoxon test	0.25	5
BC004004	0.0066137	0.131225	0.153	0.067	1	Two-sided Wilcoxon test	0.25	5
Mfhas1	0.00662657	-0.37882	0.051	0.152	1	Two-sided Wilcoxon test	0.25	5
Dusp28	0.00663377	0.0826598	0.051	0.011	1	Two-sided Wilcoxon test	0.25	5
Dnajc12	0.00669416	0.12385	0.051	0.011	1	Two-sided Wilcoxon test	0.25	5
Rplp0	0.00670042	0.379531	0.969	0.957	1	Two-sided Wilcoxon test	0.25	5
Nup210l	0.00670994	0.0628058	0.061	0.015	1	Two-sided Wilcoxon test	0.25	5
Clvs1	0.00670994	0.0780554	0.061	0.015	1	Two-sided Wilcoxon test	0.25	5
Inha	0.00675505	0.0689126	0.051	0.011	1	Two-sided Wilcoxon test	0.25	5
Gucy1a2	0.00675505	0.106355	0.051	0.011	1	Two-sided Wilcoxon test	0.25	5
Pacc1	0.00676357	0.0852845	0.061	0.015	1	Two-sided Wilcoxon test	0.25	5
1810021B22Rik	0.00681643	0.0955143	0.051	0.011	1	Two-sided Wilcoxon test	0.25	5
Zfp182	0.00681643	0.0622056	0.051	0.011	1	Two-sided Wilcoxon test	0.25	5
Mki67	0.00682361	-0.634217	0.286	0.404	1	Two-sided Wilcoxon test	0.25	5
Gnasas1	0.00687832	0.0808627	0.051	0.011	1	Two-sided Wilcoxon test	0.25	5
Pvt1	0.00687832	0.0608486	0.051	0.011	1	Two-sided Wilcoxon test	0.25	5
Ddt	0.00688815	0.272467	0.235	0.128	1	Two-sided Wilcoxon test	0.25	5
Lrrc40	0.00691698	0.19215	0.194	0.096	1	Two-sided Wilcoxon test	0.25	5
Csrnp3	0.00694071	0.0925332	0.051	0.011	1	Two-sided Wilcoxon test	0.25	5
Atg10	0.00696206	0.221242	0.122	0.05	1	Two-sided Wilcoxon test	0.25	5
Gm16754	0.0070036	0.0776066	0.051	0.011	1	Two-sided Wilcoxon test	0.25	5
Magoh	0.00705389	0.225045	0.51	0.348	1	Two-sided Wilcoxon test	0.25	5
Afap1	0.0070843	-0.382199	0.112	0.233	1	Two-sided Wilcoxon test	0.25	5
Matr3	0.00709156	-0.459343	0.296	0.415	1	Two-sided Wilcoxon test	0.25	5
Ica1	0.00710068	0.207797	0.122	0.05	1	Two-sided Wilcoxon test	0.25	5
Kif5c	0.00713094	0.0549819	0.051	0.011	1	Two-sided Wilcoxon test	0.25	5
Bclaf1	0.0071774	-0.490801	0.276	0.396	1	Two-sided Wilcoxon test	0.25	5
Col25a1	0.00719538	0.0413054	0.051	0.011	1	Two-sided Wilcoxon test	0.25	5
Got1	0.00719957	-0.309873	0.561	0.687	1	Two-sided Wilcoxon test	0.25	5
Nr6a1os	0.00720669	0.0224896	0.061	0.015	1	Two-sided Wilcoxon test	0.25	5
Wdr26	0.00721165	-0.432045	0.214	0.343	1	Two-sided Wilcoxon test	0.25	5
Dstyk	0.00726199	0.125266	0.102	0.037	1	Two-sided Wilcoxon test	0.25	5
Irx1	0.00726521	-0.243591	0	0.07	1	Two-sided Wilcoxon test	0.25	5
Cul4b	0.00732214	-0.352311	0.071	0.178	1	Two-sided Wilcoxon test	0.25	5
Usp16	0.00739801	0.157559	0.184	0.089	1	Two-sided Wilcoxon test	0.25	5
Ube2f	0.00741588	0.195904	0.265	0.146	1	Two-sided Wilcoxon test	0.25	5
Fscn1	0.00743165	0.174854	0.235	0.126	1	Two-sided Wilcoxon test	0.25	5
Cspp1	0.00752552	0.169535	0.153	0.07	1	Two-sided Wilcoxon test	0.25	5
Tagln	0.00758369	0.494439	0.735	0.624	1	Two-sided Wilcoxon test	0.25	5
Hspb2	0.00760237	0.346852	0.469	0.326	1	Two-sided Wilcoxon test	0.25	5
Eif3i	0.00765142	0.298297	0.51	0.385	1	Two-sided Wilcoxon test	0.25	5
Ctnnb1	0.00772098	-0.402185	0.52	0.62	1	Two-sided Wilcoxon test	0.25	5
Psmb3	0.00773671	0.353974	0.673	0.561	1	Two-sided Wilcoxon test	0.25	5
Gtdc1	0.00775303	0.0732793	0.133	0.054	1	Two-sided Wilcoxon test	0.25	5
Gas2l3	0.0077635	-0.416447	0.061	0.159	1	Two-sided Wilcoxon test	0.25	5
Rad23a	0.00776645	0.273694	0.214	0.113	1	Two-sided Wilcoxon test	0.25	5
Ndufa7	0.00777124	0.512544	0.5	0.383	1	Two-sided Wilcoxon test	0.25	5
Rae1	0.00777886	0.177417	0.327	0.191	1	Two-sided Wilcoxon test	0.25	5
Fam126a	0.00783744	-0.435046	0.071	0.172	1	Two-sided Wilcoxon test	0.25	5
Syne2	0.00791882	-0.534021	0.306	0.415	1	Two-sided Wilcoxon test	0.25	5
Mycn	0.00792573	-0.360205	0.031	0.12	1	Two-sided Wilcoxon test	0.25	5
Timm13	0.00795218	0.317639	0.429	0.293	1	Two-sided Wilcoxon test	0.25	5
Srsf5	0.00806834	-0.476644	0.5	0.565	1	Two-sided Wilcoxon test	0.25	5
Gnl1	0.00809872	-0.375797	0.051	0.148	1	Two-sided Wilcoxon test	0.25	5
mt-Nd3	0.00810565	0.636833	0.878	0.963	1	Two-sided Wilcoxon test	0.25	5
Cdkl3	0.00811331	0.148233	0.082	0.026	1	Two-sided Wilcoxon test	0.25	5
Casp8ap2	0.00812585	-0.491416	0.133	0.246	1	Two-sided Wilcoxon test	0.25	5
Irak1	0.00815436	0.0566137	0.102	0.037	1	Two-sided Wilcoxon test	0.25	5
Napg	0.00816108	0.18911	0.194	0.098	1	Two-sided Wilcoxon test	0.25	5
Ell2	0.00816487	0.119575	0.082	0.026	1	Two-sided Wilcoxon test	0.25	5
Gars	0.00817369	-0.394319	0.357	0.507	1	Two-sided Wilcoxon test	0.25	5
Map3k2	0.0081992	0.0918236	0.102	0.037	1	Two-sided Wilcoxon test	0.25	5
Cxcl12	0.00823555	-0.455686	0.143	0.263	1	Two-sided Wilcoxon test	0.25	5
Entr1	0.00826484	0.128876	0.173	0.083	1	Two-sided Wilcoxon test	0.25	5
Stag2	0.00834876	-0.411559	0.316	0.437	1	Two-sided Wilcoxon test	0.25	5
Pde12	0.00835429	-0.27925	0.02	0.104	1	Two-sided Wilcoxon test	0.25	5
1110059E24Rik	0.00836871	0.0794173	0.265	0.141	1	Two-sided Wilcoxon test	0.25	5
Hmgcr	0.00837588	-0.41391	0.245	0.372	1	Two-sided Wilcoxon test	0.25	5
Ccnd2	0.00840515	-0.235102	0.551	0.661	1	Two-sided Wilcoxon test	0.25	5
Ypel3	0.00842377	0.176492	0.133	0.057	1	Two-sided Wilcoxon test	0.25	5
Hbb-bs	0.0084595	0.187053	0.163	0.076	1	Two-sided Wilcoxon test	0.25	5
Fsd2	0.00846891	-0.45068	0.224	0.337	1	Two-sided Wilcoxon test	0.25	5
Cstb	0.00849998	0.227317	0.245	0.135	1	Two-sided Wilcoxon test	0.25	5
Mkrn2	0.00850157	0.154299	0.133	0.057	1	Two-sided Wilcoxon test	0.25	5
Cct5	0.00850487	-0.407064	0.592	0.657	1	Two-sided Wilcoxon test	0.25	5
Sspn	0.00852446	-0.481506	0.173	0.293	1	Two-sided Wilcoxon test	0.25	5
Dnajc15	0.00855032	0.325468	0.306	0.187	1	Two-sided Wilcoxon test	0.25	5
Mgrn1	0.00858418	0.21766	0.224	0.12	1	Two-sided Wilcoxon test	0.25	5
Lysmd3	0.00859804	0.160149	0.163	0.076	1	Two-sided Wilcoxon test	0.25	5
Anapc13	0.00864923	0.344101	0.367	0.235	1	Two-sided Wilcoxon test	0.25	5
Stx8	0.0086565	0.30362	0.286	0.17	1	Two-sided Wilcoxon test	0.25	5
Ptp4a3	0.00879144	0.290001	0.184	0.096	1	Two-sided Wilcoxon test	0.25	5
Eif5b	0.0087974	-0.467221	0.459	0.563	1	Two-sided Wilcoxon test	0.25	5
Top2b	0.00880612	-0.413596	0.429	0.535	1	Two-sided Wilcoxon test	0.25	5
Mphosph10	0.00881781	-0.432498	0.102	0.211	1	Two-sided Wilcoxon test	0.25	5
Gmds	0.00881924	0.15083	0.133	0.057	1	Two-sided Wilcoxon test	0.25	5
Adamts6	0.0089003	0.229927	0.133	0.057	1	Two-sided Wilcoxon test	0.25	5
Arhgap12	0.00890711	0.246366	0.163	0.078	1	Two-sided Wilcoxon test	0.25	5
Dync1h1	0.008964	-0.561511	0.398	0.483	1	Two-sided Wilcoxon test	0.25	5
Larp1	0.00898456	-0.402786	0.163	0.283	1	Two-sided Wilcoxon test	0.25	5
Ndufa13	0.00901728	0.484707	0.612	0.548	1	Two-sided Wilcoxon test	0.25	5
Zfp385a	0.00902866	0.152741	0.092	0.033	1	Two-sided Wilcoxon test	0.25	5
Vti1a	0.00905222	0.0312197	0.153	0.067	1	Two-sided Wilcoxon test	0.25	5
Tspan31	0.00910888	0.131877	0.204	0.102	1	Two-sided Wilcoxon test	0.25	5
Tatdn3	0.00914444	0.052086	0.082	0.026	1	Two-sided Wilcoxon test	0.25	5
Faf1	0.00918807	0.226769	0.296	0.17	1	Two-sided Wilcoxon test	0.25	5
Fchsd2	0.00919146	0.13211	0.143	0.063	1	Two-sided Wilcoxon test	0.25	5
Nectin2	0.00934309	-0.40511	0.133	0.25	1	Two-sided Wilcoxon test	0.25	5
Msl1	0.00943175	-0.260597	0.112	0.224	1	Two-sided Wilcoxon test	0.25	5
Emc2	0.0094637	-0.440666	0.235	0.359	1	Two-sided Wilcoxon test	0.25	5
Rasgef1b	0.00946563	0.186024	0.071	0.022	1	Two-sided Wilcoxon test	0.25	5
Lsm6	0.0094825	0.246898	0.612	0.446	1	Two-sided Wilcoxon test	0.25	5
Fhit	0.00950601	0.168371	0.092	0.033	1	Two-sided Wilcoxon test	0.25	5
mt-Nd6	0.0095102	-0.426861	0.663	0.754	1	Two-sided Wilcoxon test	0.25	5
Snhg8	0.00955753	0.274726	0.153	0.074	1	Two-sided Wilcoxon test	0.25	5
Atp9b	0.00955989	0.180021	0.224	0.12	1	Two-sided Wilcoxon test	0.25	5
Glrx2	0.00963612	0.161197	0.316	0.183	1	Two-sided Wilcoxon test	0.25	5
Gse1	0.00967143	0.244255	0.214	0.115	1	Two-sided Wilcoxon test	0.25	5
E2f4	0.00970416	0.100016	0.133	0.057	1	Two-sided Wilcoxon test	0.25	5
Slc23a2	0.00972403	0.146369	0.071	0.022	1	Two-sided Wilcoxon test	0.25	5
Ppp3ca	0.00972821	0.300139	0.367	0.241	1	Two-sided Wilcoxon test	0.25	5
Gtf2f2	0.00973021	0.0895786	0.194	0.096	1	Two-sided Wilcoxon test	0.25	5
Rps7	0.00974569	0.421048	0.969	0.961	1	Two-sided Wilcoxon test	0.25	5
Gpatch4	0.00974739	-0.318065	0.02	0.1	1	Two-sided Wilcoxon test	0.25	5
H1f0	0.00976287	0.230284	0.316	0.189	1	Two-sided Wilcoxon test	0.25	5
Tmem132a	0.00981306	-0.338244	0.041	0.13	1	Two-sided Wilcoxon test	0.25	5
Smim11	0.00981766	0.0926559	0.265	0.148	1	Two-sided Wilcoxon test	0.25	5
Nol10	0.00983663	0.103451	0.092	0.033	1	Two-sided Wilcoxon test	0.25	5
Med21	0.00986665	0.207608	0.378	0.243	1	Two-sided Wilcoxon test	0.25	5
Hira	0.00988252	0.151583	0.245	0.133	1	Two-sided Wilcoxon test	0.25	5
Cog2	0.00989271	0.127246	0.092	0.033	1	Two-sided Wilcoxon test	0.25	5
H3f3b	0.0100074	-0.274846	0.786	0.85	1	Two-sided Wilcoxon test	0.25	5
Adamts9	0.0100818	-0.432418	0.092	0.198	1	Two-sided Wilcoxon test	0.25	5
Grip1	0.0100915	0.335543	0.204	0.111	1	Two-sided Wilcoxon test	0.25	5
Hmgb1	0.0100999	-0.368601	0.867	0.883	1	Two-sided Wilcoxon test	0.25	5
3110082I17Rik	0.0101234	0.121423	0.071	0.022	1	Two-sided Wilcoxon test	0.25	5
Scand1	0.0101284	0.263342	0.327	0.2	1	Two-sided Wilcoxon test	0.25	5
Larp7	0.0101301	-0.456513	0.245	0.365	1	Two-sided Wilcoxon test	0.25	5
Coq6	0.0101768	0.181808	0.153	0.072	1	Two-sided Wilcoxon test	0.25	5
Pibf1	0.0101847	0.103524	0.153	0.07	1	Two-sided Wilcoxon test	0.25	5
Rbm10	0.0102008	-0.357624	0.041	0.128	1	Two-sided Wilcoxon test	0.25	5
Ip6k2	0.0102366	0.204677	0.122	0.052	1	Two-sided Wilcoxon test	0.25	5
Slc8a1	0.0102786	-0.230531	0.888	0.95	1	Two-sided Wilcoxon test	0.25	5
Rps6kb1	0.0103101	-0.429334	0.133	0.241	1	Two-sided Wilcoxon test	0.25	5
Shroom2	0.0105106	0.167599	0.112	0.046	1	Two-sided Wilcoxon test	0.25	5
Cnn1	0.0105373	0.398839	0.541	0.415	1	Two-sided Wilcoxon test	0.25	5
Psma3	0.0106328	-0.304395	0.622	0.715	1	Two-sided Wilcoxon test	0.25	5
Mms22l	0.0106408	0.160939	0.173	0.085	1	Two-sided Wilcoxon test	0.25	5
Lars	0.0106953	-0.399445	0.347	0.463	1	Two-sided Wilcoxon test	0.25	5
Dusp10	0.0107398	0.13921	0.102	0.039	1	Two-sided Wilcoxon test	0.25	5
Paip2	0.0107634	0.298941	0.429	0.289	1	Two-sided Wilcoxon test	0.25	5
Ppp4r3a	0.0108091	-0.466049	0.173	0.28	1	Two-sided Wilcoxon test	0.25	5
Tbc1d19	0.0108216	0.0684033	0.071	0.022	1	Two-sided Wilcoxon test	0.25	5
Cdh13	0.0108369	0.163106	0.143	0.065	1	Two-sided Wilcoxon test	0.25	5
Hist1h4d	0.0108812	0.298698	0.245	0.141	1	Two-sided Wilcoxon test	0.25	5
Cct7	0.0109428	-0.434009	0.622	0.693	1	Two-sided Wilcoxon test	0.25	5
Rpl38	0.0109518	0.406928	0.847	0.774	1	Two-sided Wilcoxon test	0.25	5
Arhgap6	0.0110347	0.331069	0.265	0.163	1	Two-sided Wilcoxon test	0.25	5
Airn	0.0110614	0.441271	0.602	0.487	1	Two-sided Wilcoxon test	0.25	5
Kank2	0.0110871	-0.292008	0.041	0.13	1	Two-sided Wilcoxon test	0.25	5
Glul	0.0111056	0.0513224	0.133	0.057	1	Two-sided Wilcoxon test	0.25	5
Eif2d	0.0111576	0.189185	0.082	0.028	1	Two-sided Wilcoxon test	0.25	5
Rnf111	0.0111622	0.21724	0.163	0.08	1	Two-sided Wilcoxon test	0.25	5
Rbm15	0.0111678	-0.384324	0.092	0.196	1	Two-sided Wilcoxon test	0.25	5
Mcm3	0.0111763	-0.506637	0.184	0.293	1	Two-sided Wilcoxon test	0.25	5
Rpl8	0.0111915	0.263449	0.969	0.93	1	Two-sided Wilcoxon test	0.25	5
Knstrn	0.0112414	0.308848	0.276	0.17	1	Two-sided Wilcoxon test	0.25	5
Fgfr2	0.0112493	0.114062	0.184	0.089	1	Two-sided Wilcoxon test	0.25	5
Ttc17	0.0112564	0.127435	0.102	0.039	1	Two-sided Wilcoxon test	0.25	5
Polr3e	0.011258	0.152943	0.112	0.046	1	Two-sided Wilcoxon test	0.25	5
Eps15l1	0.0113388	0.177652	0.122	0.052	1	Two-sided Wilcoxon test	0.25	5
Tspan13	0.011352	0.140626	0.143	0.065	1	Two-sided Wilcoxon test	0.25	5
Tmem47	0.0113677	-0.361847	0.092	0.196	1	Two-sided Wilcoxon test	0.25	5
Gm37240	0.0113742	0.102008	0.102	0.039	1	Two-sided Wilcoxon test	0.25	5
Pafah1b1	0.0113988	-0.404929	0.551	0.641	1	Two-sided Wilcoxon test	0.25	5
Obscn	0.011411	-0.495111	0.337	0.435	1	Two-sided Wilcoxon test	0.25	5
Ctxn1	0.0114273	0.143957	0.082	0.028	1	Two-sided Wilcoxon test	0.25	5
Uggt2	0.0115361	0.166026	0.112	0.046	1	Two-sided Wilcoxon test	0.25	5
Fyb2	0.0115532	0.187751	0.061	0.017	1	Two-sided Wilcoxon test	0.25	5
Trappc1	0.0115812	0.121238	0.49	0.326	1	Two-sided Wilcoxon test	0.25	5
Dhx57	0.0116734	0.116113	0.102	0.039	1	Two-sided Wilcoxon test	0.25	5
Snap23	0.0116884	0.118066	0.235	0.126	1	Two-sided Wilcoxon test	0.25	5
Setd2	0.011721	0.201678	0.296	0.176	1	Two-sided Wilcoxon test	0.25	5
Hsph1	0.011781	-0.47234	0.153	0.27	1	Two-sided Wilcoxon test	0.25	5
Atxn7	0.011795	0.121144	0.102	0.039	1	Two-sided Wilcoxon test	0.25	5
Dynlrb1	0.0118105	0.375564	0.571	0.437	1	Two-sided Wilcoxon test	0.25	5
Tenm4	0.0118562	0.104663	0.102	0.039	1	Two-sided Wilcoxon test	0.25	5
Atp5mpl	0.0118795	0.378481	0.602	0.476	1	Two-sided Wilcoxon test	0.25	5
Etv6	0.0118819	0.119114	0.235	0.128	1	Two-sided Wilcoxon test	0.25	5
Rock1	0.0118834	-0.416102	0.357	0.474	1	Two-sided Wilcoxon test	0.25	5
Thap2	0.0119227	0.182914	0.153	0.072	1	Two-sided Wilcoxon test	0.25	5
Ndufa3	0.011932	0.256906	0.347	0.222	1	Two-sided Wilcoxon test	0.25	5
Vars	0.0119592	-0.377786	0.102	0.207	1	Two-sided Wilcoxon test	0.25	5
Polr2k	0.0119691	0.168561	0.306	0.18	1	Two-sided Wilcoxon test	0.25	5
1810037I17Rik	0.0119725	0.321365	0.429	0.289	1	Two-sided Wilcoxon test	0.25	5
Plppr5	0.0121108	0.105809	0.112	0.046	1	Two-sided Wilcoxon test	0.25	5
Dip2b	0.0121283	0.295923	0.306	0.187	1	Two-sided Wilcoxon test	0.25	5
Klc1	0.0122851	-0.343907	0.061	0.157	1	Two-sided Wilcoxon test	0.25	5
Hectd2os	0.0122881	0.13384	0.112	0.046	1	Two-sided Wilcoxon test	0.25	5
Tasp1	0.0122886	0.216907	0.092	0.035	1	Two-sided Wilcoxon test	0.25	5
Naa15	0.0123333	-0.404228	0.286	0.402	1	Two-sided Wilcoxon test	0.25	5
Ncor1	0.0124225	-0.488999	0.449	0.537	1	Two-sided Wilcoxon test	0.25	5
Tmsb15b2	0.0125077	0.0952597	0.061	0.017	1	Two-sided Wilcoxon test	0.25	5
Atg4a	0.0125077	0.0648067	0.061	0.017	1	Two-sided Wilcoxon test	0.25	5
Zxdc	0.0125651	0.111276	0.082	0.028	1	Two-sided Wilcoxon test	0.25	5
Tomm70a	0.0125688	-0.448775	0.276	0.387	1	Two-sided Wilcoxon test	0.25	5
Nhs	0.0125978	0.071563	0.061	0.017	1	Two-sided Wilcoxon test	0.25	5
Prkce	0.012621	0.258276	0.286	0.174	1	Two-sided Wilcoxon test	0.25	5
Rpl19	0.0126244	0.281489	0.969	0.933	1	Two-sided Wilcoxon test	0.25	5
Abhd4	0.0126783	0.0909597	0.102	0.039	1	Two-sided Wilcoxon test	0.25	5
Pcgf2	0.0126886	0.0896898	0.061	0.017	1	Two-sided Wilcoxon test	0.25	5
Mtbp	0.0127034	-0.24663	0.01	0.08	1	Two-sided Wilcoxon test	0.25	5
Nisch	0.0127214	-0.423052	0.469	0.543	1	Two-sided Wilcoxon test	0.25	5
Atad1	0.0127322	-0.392576	0.143	0.257	1	Two-sided Wilcoxon test	0.25	5
Cdk5	0.0127537	0.229938	0.112	0.048	1	Two-sided Wilcoxon test	0.25	5
Sqle	0.0127794	-0.416932	0.071	0.163	1	Two-sided Wilcoxon test	0.25	5
Cfap410	0.0127799	0.0716878	0.061	0.017	1	Two-sided Wilcoxon test	0.25	5
Hmgn2	0.0128684	-0.385127	0.561	0.672	1	Two-sided Wilcoxon test	0.25	5
G3bp1	0.0129277	-0.387408	0.612	0.672	1	Two-sided Wilcoxon test	0.25	5
Ankle1	0.0129642	0.0646941	0.061	0.017	1	Two-sided Wilcoxon test	0.25	5
Sae1	0.012986	-0.359957	0.337	0.47	1	Two-sided Wilcoxon test	0.25	5
Tesc	0.0129946	0.19725	0.122	0.054	1	Two-sided Wilcoxon test	0.25	5
Atp10a	0.0130572	0.0619983	0.061	0.017	1	Two-sided Wilcoxon test	0.25	5
Taf3	0.0131118	0.217343	0.122	0.054	1	Two-sided Wilcoxon test	0.25	5
Snx29	0.0131509	0.0420355	0.061	0.017	1	Two-sided Wilcoxon test	0.25	5
Klc4	0.0131509	0.0657177	0.061	0.017	1	Two-sided Wilcoxon test	0.25	5
Plec	0.0132388	-0.311826	0.235	0.367	1	Two-sided Wilcoxon test	0.25	5
Pitx2	0.0132662	0.144773	0.133	0.059	1	Two-sided Wilcoxon test	0.25	5
Dennd1a	0.0133491	0.273144	0.122	0.054	1	Two-sided Wilcoxon test	0.25	5
Mir100hg	0.0134044	0.0893569	0.082	0.028	1	Two-sided Wilcoxon test	0.25	5
Atp1a1	0.0134109	-0.342674	0.735	0.787	1	Two-sided Wilcoxon test	0.25	5
Il1rapl1	0.0134517	-0.356758	0.102	0.209	1	Two-sided Wilcoxon test	0.25	5
Sel1l	0.0134812	-0.342711	0.092	0.191	1	Two-sided Wilcoxon test	0.25	5
Mfap4	0.0134831	0.082371	0.082	0.028	1	Two-sided Wilcoxon test	0.25	5
Trappc9	0.0134831	0.108442	0.082	0.028	1	Two-sided Wilcoxon test	0.25	5
Tvp23a	0.0135531	0.169313	0.051	0.013	1	Two-sided Wilcoxon test	0.25	5
Cox20	0.0135666	0.194712	0.306	0.185	1	Two-sided Wilcoxon test	0.25	5
Rps28	0.0136412	0.386756	0.776	0.722	1	Two-sided Wilcoxon test	0.25	5
Nipsnap2	0.01369	0.260922	0.449	0.315	1	Two-sided Wilcoxon test	0.25	5
Fgf13	0.0137349	0.26819	0.214	0.12	1	Two-sided Wilcoxon test	0.25	5
Osgep	0.0137521	0.261954	0.306	0.189	1	Two-sided Wilcoxon test	0.25	5
Rbp4	0.0137717	0.18233	0.051	0.013	1	Two-sided Wilcoxon test	0.25	5
Ano4	0.0138399	0.178026	0.092	0.035	1	Two-sided Wilcoxon test	0.25	5
Obsl1	0.0138424	-0.523841	0.194	0.3	1	Two-sided Wilcoxon test	0.25	5
Otud1	0.0138755	-0.316983	0.031	0.111	1	Two-sided Wilcoxon test	0.25	5
Prorp	0.0138827	0.0470178	0.082	0.028	1	Two-sided Wilcoxon test	0.25	5
Clock	0.0140397	0.0697213	0.153	0.072	1	Two-sided Wilcoxon test	0.25	5
Lmo4	0.0141066	0.249549	0.143	0.067	1	Two-sided Wilcoxon test	0.25	5
B930036N10Rik	0.0142183	0.0849953	0.051	0.013	1	Two-sided Wilcoxon test	0.25	5
Mob3b	0.0142183	0.141715	0.051	0.013	1	Two-sided Wilcoxon test	0.25	5
2310040G24Rik	0.0142183	0.101035	0.051	0.013	1	Two-sided Wilcoxon test	0.25	5
Mlec	0.0142876	-0.329727	0.388	0.524	1	Two-sided Wilcoxon test	0.25	5
C87436	0.0142928	0.067108	0.082	0.028	1	Two-sided Wilcoxon test	0.25	5
Pcif1	0.0143629	0.174924	0.153	0.074	1	Two-sided Wilcoxon test	0.25	5
Gm47167	0.0144464	0.0577008	0.051	0.013	1	Two-sided Wilcoxon test	0.25	5
Ccng1	0.0145428	0.357911	0.276	0.165	1	Two-sided Wilcoxon test	0.25	5
Shf	0.0145616	0.0857169	0.051	0.013	1	Two-sided Wilcoxon test	0.25	5
Lnx2	0.0145616	0.118961	0.051	0.013	1	Two-sided Wilcoxon test	0.25	5
Gm11944	0.0145616	0.08116	0.051	0.013	1	Two-sided Wilcoxon test	0.25	5
Gsdme	0.0147024	0.203728	0.224	0.126	1	Two-sided Wilcoxon test	0.25	5
Tanc2	0.0147096	0.270747	0.255	0.157	1	Two-sided Wilcoxon test	0.25	5
Emilin2	0.0147107	-0.461726	0.296	0.398	1	Two-sided Wilcoxon test	0.25	5
Uba7	0.0147945	0.0740193	0.051	0.013	1	Two-sided Wilcoxon test	0.25	5
Akt3	0.0148635	0.189948	0.214	0.117	1	Two-sided Wilcoxon test	0.25	5
Lhfp	0.0149015	0.193495	0.184	0.096	1	Two-sided Wilcoxon test	0.25	5
Cldn12	0.0149122	0.0747512	0.051	0.013	1	Two-sided Wilcoxon test	0.25	5
Sem1	0.0150096	0.37483	0.561	0.461	1	Two-sided Wilcoxon test	0.25	5
Lrrfip2	0.0151175	0.142852	0.276	0.161	1	Two-sided Wilcoxon test	0.25	5
Acyp2	0.0151773	0.177311	0.112	0.048	1	Two-sided Wilcoxon test	0.25	5
Rnf167	0.0151773	0.133589	0.112	0.048	1	Two-sided Wilcoxon test	0.25	5
Col4a6	0.0151857	0.217059	0.122	0.054	1	Two-sided Wilcoxon test	0.25	5
Apbb2	0.0152231	0.233233	0.184	0.098	1	Two-sided Wilcoxon test	0.25	5
Gm26632	0.0152352	0.13559	0.092	0.035	1	Two-sided Wilcoxon test	0.25	5
Mn1	0.0152702	0.0419368	0.051	0.013	1	Two-sided Wilcoxon test	0.25	5
Zcwpw1	0.0152702	0.069789	0.051	0.013	1	Two-sided Wilcoxon test	0.25	5
Fras1	0.0152874	-0.465316	0.163	0.27	1	Two-sided Wilcoxon test	0.25	5
P3h1	0.0153192	0.123739	0.112	0.048	1	Two-sided Wilcoxon test	0.25	5
Git1	0.0153879	0.155806	0.122	0.054	1	Two-sided Wilcoxon test	0.25	5
Scarb1	0.015444	0.289054	0.112	0.05	1	Two-sided Wilcoxon test	0.25	5
Rps5	0.0154539	0.389904	0.959	0.954	1	Two-sided Wilcoxon test	0.25	5
Lmod1	0.0154626	0.133665	0.071	0.024	1	Two-sided Wilcoxon test	0.25	5
Zfp362	0.0155441	0.0573008	0.143	0.065	1	Two-sided Wilcoxon test	0.25	5
Zfas1	0.0155518	0.096845	0.102	0.041	1	Two-sided Wilcoxon test	0.25	5
Borcs5	0.0155588	0.158786	0.071	0.024	1	Two-sided Wilcoxon test	0.25	5
Kif16b	0.0155924	0.116772	0.122	0.054	1	Two-sided Wilcoxon test	0.25	5
Smyd1	0.0156093	-0.31425	0.612	0.65	1	Two-sided Wilcoxon test	0.25	5
Lancl1	0.0156287	0.11303	0.102	0.041	1	Two-sided Wilcoxon test	0.25	5
Olfm1	0.0156357	0.0688974	0.051	0.013	1	Two-sided Wilcoxon test	0.25	5
Rgs10	0.0156525	0.305287	0.122	0.057	1	Two-sided Wilcoxon test	0.25	5
Mettl9	0.0156539	-0.465489	0.276	0.374	1	Two-sided Wilcoxon test	0.25	5
Fam149b	0.0156611	0.157648	0.122	0.054	1	Two-sided Wilcoxon test	0.25	5
Cox19	0.0156796	0.166667	0.224	0.124	1	Two-sided Wilcoxon test	0.25	5
1110032A03Rik	0.0157518	0.124328	0.112	0.048	1	Two-sided Wilcoxon test	0.25	5
Melk	0.0157608	-0.369938	0.071	0.161	1	Two-sided Wilcoxon test	0.25	5
Mtch1	0.0157746	-0.341344	0.469	0.58	1	Two-sided Wilcoxon test	0.25	5
Exoc3	0.0158046	-0.358301	0.204	0.32	1	Two-sided Wilcoxon test	0.25	5
Ranbp17	0.0158104	0.069801	0.092	0.035	1	Two-sided Wilcoxon test	0.25	5
Gm14325	0.0158256	0.117536	0.153	0.074	1	Two-sided Wilcoxon test	0.25	5
Pin4	0.0158267	0.201711	0.173	0.089	1	Two-sided Wilcoxon test	0.25	5
Gm10076	0.0159426	0.229951	0.745	0.652	1	Two-sided Wilcoxon test	0.25	5
Irf2bp2	0.0159726	-0.349997	0.051	0.137	1	Two-sided Wilcoxon test	0.25	5
Commd9	0.0159817	0.230846	0.194	0.109	1	Two-sided Wilcoxon test	0.25	5
Pphln1	0.0160095	0.0898741	0.163	0.08	1	Two-sided Wilcoxon test	0.25	5
Rps4x	0.0160843	0.370259	1	0.963	1	Two-sided Wilcoxon test	0.25	5
Cav3	0.0161264	-0.416293	0.071	0.157	1	Two-sided Wilcoxon test	0.25	5
Hspb7	0.0161362	-0.449232	0.418	0.509	1	Two-sided Wilcoxon test	0.25	5
Nes	0.0162724	-0.359901	0.153	0.267	1	Two-sided Wilcoxon test	0.25	5
Dnmt1	0.0162962	-0.509927	0.316	0.411	1	Two-sided Wilcoxon test	0.25	5
mt-Atp8	0.016305	0.422187	0.684	0.626	1	Two-sided Wilcoxon test	0.25	5
Rpl24	0.0163338	0.407486	0.878	0.867	1	Two-sided Wilcoxon test	0.25	5
E2f5	0.0163473	0.0840729	0.071	0.024	1	Two-sided Wilcoxon test	0.25	5
Snrnp200	0.0163715	-0.463237	0.173	0.285	1	Two-sided Wilcoxon test	0.25	5
Tspo	0.0165224	-0.360649	0.102	0.202	1	Two-sided Wilcoxon test	0.25	5
Ggps1	0.0165604	0.276982	0.184	0.102	1	Two-sided Wilcoxon test	0.25	5
Hnrnpul2	0.0165682	-0.347875	0.214	0.33	1	Two-sided Wilcoxon test	0.25	5
Zfhx3	0.0165722	-0.388767	0.204	0.313	1	Two-sided Wilcoxon test	0.25	5
Plpbp	0.0165855	0.146294	0.133	0.061	1	Two-sided Wilcoxon test	0.25	5
Brd9	0.0165918	-0.391096	0.102	0.198	1	Two-sided Wilcoxon test	0.25	5
Timm8b	0.0165944	0.298666	0.459	0.339	1	Two-sided Wilcoxon test	0.25	5
Pdk1	0.0166137	-0.430777	0.194	0.302	1	Two-sided Wilcoxon test	0.25	5
Zfp560	0.0166519	0.100096	0.071	0.024	1	Two-sided Wilcoxon test	0.25	5
Pds5a	0.016656	0.248299	0.286	0.174	1	Two-sided Wilcoxon test	0.25	5
Gemin7	0.0167285	0.142722	0.194	0.102	1	Two-sided Wilcoxon test	0.25	5
Ano6	0.0167937	0.0537157	0.133	0.061	1	Two-sided Wilcoxon test	0.25	5
Gnas	0.0168247	0.26176	0.796	0.748	1	Two-sided Wilcoxon test	0.25	5
Umps	0.0168314	-0.420938	0.071	0.159	1	Two-sided Wilcoxon test	0.25	5
Wrn	0.0170398	0.110718	0.143	0.067	1	Two-sided Wilcoxon test	0.25	5
Fbxo45	0.0170589	-0.324918	0.082	0.178	1	Two-sided Wilcoxon test	0.25	5
Ndufb6	0.0170821	0.225777	0.49	0.343	1	Two-sided Wilcoxon test	0.25	5
Znrd2	0.0170841	0.182299	0.337	0.217	1	Two-sided Wilcoxon test	0.25	5
Srsf7	0.0171371	-0.448901	0.429	0.533	1	Two-sided Wilcoxon test	0.25	5
Alkbh6	0.0171937	0.249298	0.102	0.043	1	Two-sided Wilcoxon test	0.25	5
Col4a2	0.0172493	-0.4079	0.316	0.424	1	Two-sided Wilcoxon test	0.25	5
Cnot1	0.0172701	-0.357338	0.316	0.433	1	Two-sided Wilcoxon test	0.25	5
Cdk11b	0.0172751	0.30365	0.316	0.202	1	Two-sided Wilcoxon test	0.25	5
Cdkal1	0.0173842	0.18284	0.184	0.096	1	Two-sided Wilcoxon test	0.25	5
Ubl4a	0.0173949	0.176672	0.204	0.113	1	Two-sided Wilcoxon test	0.25	5
Aaas	0.0174313	0.106532	0.112	0.048	1	Two-sided Wilcoxon test	0.25	5
Sema6a	0.0174424	0.183378	0.082	0.03	1	Two-sided Wilcoxon test	0.25	5
Trmt1	0.0175162	0.230206	0.143	0.07	1	Two-sided Wilcoxon test	0.25	5
Rbpms2	0.017556	0.286143	0.357	0.237	1	Two-sided Wilcoxon test	0.25	5
Mrps6	0.0175573	0.136067	0.235	0.133	1	Two-sided Wilcoxon test	0.25	5
Rnf169	0.0176496	0.0706351	0.133	0.061	1	Two-sided Wilcoxon test	0.25	5
Cip2a	0.0176886	0.0849254	0.143	0.07	1	Two-sided Wilcoxon test	0.25	5
Tjp2	0.0177102	-0.330632	0.092	0.189	1	Two-sided Wilcoxon test	0.25	5
Coq4	0.0177991	0.105108	0.143	0.067	1	Two-sided Wilcoxon test	0.25	5
Sdf2l1	0.0178489	-0.372955	0.133	0.235	1	Two-sided Wilcoxon test	0.25	5
Ro60	0.0179784	-0.423423	0.092	0.183	1	Two-sided Wilcoxon test	0.25	5
Cblb	0.0180822	0.0415044	0.163	0.08	1	Two-sided Wilcoxon test	0.25	5
Gm15283	0.0180928	0.0961516	0.153	0.074	1	Two-sided Wilcoxon test	0.25	5
Tbk1	0.0182394	0.124278	0.122	0.054	1	Two-sided Wilcoxon test	0.25	5
S100a13	0.0183692	0.0792619	0.153	0.074	1	Two-sided Wilcoxon test	0.25	5
Usp29	0.0183768	0.171595	0.133	0.063	1	Two-sided Wilcoxon test	0.25	5
Ap4b1	0.0184019	-0.225216	0	0.054	1	Two-sided Wilcoxon test	0.25	5
Dusp7	0.0184019	-0.196952	0	0.054	1	Two-sided Wilcoxon test	0.25	5
Arl13b	0.0184019	-0.184091	0	0.054	1	Two-sided Wilcoxon test	0.25	5
Usp53	0.0184342	0.175958	0.082	0.03	1	Two-sided Wilcoxon test	0.25	5
Ptma	0.0185293	-0.293675	0.969	0.985	1	Two-sided Wilcoxon test	0.25	5
Macrod2	0.0185643	0.202344	0.133	0.063	1	Two-sided Wilcoxon test	0.25	5
Cyc1	0.0185711	-0.348961	0.714	0.735	1	Two-sided Wilcoxon test	0.25	5
Cebpzos	0.0186169	0.248317	0.163	0.087	1	Two-sided Wilcoxon test	0.25	5
Arl8b	0.018648	0.1898	0.255	0.15	1	Two-sided Wilcoxon test	0.25	5
Banp	0.0186481	0.190699	0.092	0.037	1	Two-sided Wilcoxon test	0.25	5
Aff3	0.0187547	0.161212	0.143	0.07	1	Two-sided Wilcoxon test	0.25	5
Bora	0.0188088	0.0305171	0.102	0.041	1	Two-sided Wilcoxon test	0.25	5
Mnat1	0.0188216	0.115294	0.173	0.089	1	Two-sided Wilcoxon test	0.25	5
Dnajc19	0.018855	0.220276	0.276	0.17	1	Two-sided Wilcoxon test	0.25	5
Rit1	0.0188888	0.0795477	0.133	0.061	1	Two-sided Wilcoxon test	0.25	5
Mfn2	0.0189057	-0.345289	0.184	0.296	1	Two-sided Wilcoxon test	0.25	5
Sobp	0.0189136	0.186501	0.102	0.043	1	Two-sided Wilcoxon test	0.25	5
Myadm	0.0189396	-0.241538	0.031	0.107	1	Two-sided Wilcoxon test	0.25	5
Sod1	0.0190073	0.24667	0.255	0.154	1	Two-sided Wilcoxon test	0.25	5
Pde4dip	0.0190189	-0.343208	0.245	0.37	1	Two-sided Wilcoxon test	0.25	5
Fbxw5	0.0190484	0.165988	0.143	0.07	1	Two-sided Wilcoxon test	0.25	5
Aptx	0.0190526	0.119983	0.082	0.03	1	Two-sided Wilcoxon test	0.25	5
Ints9	0.0191575	0.118644	0.082	0.03	1	Two-sided Wilcoxon test	0.25	5
Ahsa1	0.0192483	-0.303061	0.316	0.422	1	Two-sided Wilcoxon test	0.25	5
Gm11808	0.0193705	0.0619396	0.122	0.054	1	Two-sided Wilcoxon test	0.25	5
Wnk1	0.019442	-0.392584	0.5	0.589	1	Two-sided Wilcoxon test	0.25	5
Chmp3	0.0195874	0.212982	0.286	0.178	1	Two-sided Wilcoxon test	0.25	5
Arnt	0.0197126	0.0466177	0.143	0.067	1	Two-sided Wilcoxon test	0.25	5
Cab39l	0.0197354	0.181465	0.102	0.043	1	Two-sided Wilcoxon test	0.25	5
Gng2	0.0197504	0.202947	0.224	0.128	1	Two-sided Wilcoxon test	0.25	5
Siva1	0.0198308	0.287828	0.398	0.283	1	Two-sided Wilcoxon test	0.25	5
Pwwp3a	0.0201078	-0.325549	0.051	0.133	1	Two-sided Wilcoxon test	0.25	5
Ppwd1	0.0202474	0.133631	0.133	0.063	1	Two-sided Wilcoxon test	0.25	5
Tmod1	0.0202487	0.192954	0.582	0.437	1	Two-sided Wilcoxon test	0.25	5
Gnai2	0.0202553	-0.384312	0.449	0.541	1	Two-sided Wilcoxon test	0.25	5
Ldha	0.0204168	-0.249562	0.918	0.939	1	Two-sided Wilcoxon test	0.25	5
Psmb6	0.0205349	0.225715	0.745	0.604	1	Two-sided Wilcoxon test	0.25	5
Myo5a	0.0205675	0.198274	0.204	0.115	1	Two-sided Wilcoxon test	0.25	5
Mgat4b	0.0205748	0.123804	0.133	0.063	1	Two-sided Wilcoxon test	0.25	5
Camkmt	0.0205883	0.143115	0.102	0.043	1	Two-sided Wilcoxon test	0.25	5
Aldh1b1	0.020697	-0.358731	0.245	0.359	1	Two-sided Wilcoxon test	0.25	5
Frmd5	0.0207331	0.193743	0.092	0.037	1	Two-sided Wilcoxon test	0.25	5
Smc3	0.0207555	-0.451574	0.408	0.498	1	Two-sided Wilcoxon test	0.25	5
Tnnt3	0.0208032	0.179802	0.061	0.02	1	Two-sided Wilcoxon test	0.25	5
Nono	0.0208208	-0.348864	0.531	0.622	1	Two-sided Wilcoxon test	0.25	5
Pola1	0.0208592	0.19226	0.214	0.122	1	Two-sided Wilcoxon test	0.25	5
Mxd4	0.0209107	0.123238	0.153	0.074	1	Two-sided Wilcoxon test	0.25	5
Nckap5	0.0209395	0.116825	0.061	0.02	1	Two-sided Wilcoxon test	0.25	5
Kdr	0.0209395	0.209558	0.061	0.02	1	Two-sided Wilcoxon test	0.25	5
Spindoc	0.0210758	0.128108	0.102	0.043	1	Two-sided Wilcoxon test	0.25	5
Kif24	0.0210765	0.10754	0.061	0.02	1	Two-sided Wilcoxon test	0.25	5
Rbm20	0.02117	0.576376	0.367	0.274	1	Two-sided Wilcoxon test	0.25	5
Mrps25	0.0212202	-0.430013	0.173	0.267	1	Two-sided Wilcoxon test	0.25	5
Epb41l4aos	0.0213623	0.0330021	0.082	0.03	1	Two-sided Wilcoxon test	0.25	5
Crabp2	0.0214923	0.122871	0.061	0.02	1	Two-sided Wilcoxon test	0.25	5
Top1	0.0214987	-0.432515	0.551	0.617	1	Two-sided Wilcoxon test	0.25	5
Atpaf1	0.0215165	-0.365515	0.112	0.204	1	Two-sided Wilcoxon test	0.25	5
Dut	0.0215425	-0.35076	0.469	0.565	1	Two-sided Wilcoxon test	0.25	5
Fbn1	0.0216871	0.0945216	0.092	0.037	1	Two-sided Wilcoxon test	0.25	5
Znrf3	0.0217192	0.122502	0.122	0.057	1	Two-sided Wilcoxon test	0.25	5
Dock9	0.0217735	0.0904561	0.061	0.02	1	Two-sided Wilcoxon test	0.25	5
Pign	0.0217753	0.0971382	0.102	0.043	1	Two-sided Wilcoxon test	0.25	5
Arhgap29	0.0218572	-0.267406	0.245	0.363	1	Two-sided Wilcoxon test	0.25	5
Trerf1	0.0219074	0.113933	0.112	0.05	1	Two-sided Wilcoxon test	0.25	5
Tbck	0.0219605	0.114379	0.143	0.07	1	Two-sided Wilcoxon test	0.25	5
Scn5a	0.0220495	-0.398376	0.092	0.183	1	Two-sided Wilcoxon test	0.25	5
Slx4ip	0.0220839	0.0806153	0.122	0.057	1	Two-sided Wilcoxon test	0.25	5
Cuedc2	0.0221293	0.22205	0.367	0.243	1	Two-sided Wilcoxon test	0.25	5
Ehbp1	0.0221374	0.300642	0.245	0.148	1	Two-sided Wilcoxon test	0.25	5
Naa25	0.0221415	-0.412707	0.102	0.189	1	Two-sided Wilcoxon test	0.25	5
Minpp1	0.0221419	-0.323874	0.122	0.224	1	Two-sided Wilcoxon test	0.25	5
4933431K23Rik	0.0222013	0.0664013	0.061	0.02	1	Two-sided Wilcoxon test	0.25	5
Ppcdc	0.0222013	0.0919565	0.061	0.02	1	Two-sided Wilcoxon test	0.25	5
Tmx1	0.0222581	-0.241021	0.133	0.235	1	Two-sided Wilcoxon test	0.25	5
Cct2	0.02242	-0.300627	0.745	0.754	1	Two-sided Wilcoxon test	0.25	5
Ntmt1	0.0224249	-0.335412	0.071	0.157	1	Two-sided Wilcoxon test	0.25	5
Sarnp	0.0224471	-0.338859	0.633	0.665	1	Two-sided Wilcoxon test	0.25	5
Dyrk2	0.0225478	-0.447187	0.163	0.261	1	Two-sided Wilcoxon test	0.25	5
Prrc2a	0.0226429	-0.412792	0.194	0.289	1	Two-sided Wilcoxon test	0.25	5
Rian	0.0227276	0.0950842	0.133	0.063	1	Two-sided Wilcoxon test	0.25	5
Zhx3	0.0228131	0.253636	0.071	0.026	1	Two-sided Wilcoxon test	0.25	5
Htra1	0.0228131	0.208836	0.071	0.026	1	Two-sided Wilcoxon test	0.25	5
Rpl9	0.0229016	0.352952	0.949	0.874	1	Two-sided Wilcoxon test	0.25	5
Xylt1	0.0229304	0.0371058	0.061	0.02	1	Two-sided Wilcoxon test	0.25	5
Ogfrl1	0.0230364	-0.294322	0.041	0.117	1	Two-sided Wilcoxon test	0.25	5
Nploc4	0.0232021	0.214655	0.153	0.08	1	Two-sided Wilcoxon test	0.25	5
Nrxn3	0.0232279	0.0484906	0.061	0.02	1	Two-sided Wilcoxon test	0.25	5
Cep19	0.0232279	0.0324841	0.061	0.02	1	Two-sided Wilcoxon test	0.25	5
Copb1	0.0232354	-0.52107	0.296	0.365	1	Two-sided Wilcoxon test	0.25	5
Rfxap	0.0232492	-0.370565	0.092	0.18	1	Two-sided Wilcoxon test	0.25	5
Trip12	0.0234126	-0.320408	0.418	0.537	1	Two-sided Wilcoxon test	0.25	5
Mrpl35	0.0234617	0.269509	0.306	0.198	1	Two-sided Wilcoxon test	0.25	5
Borcs6	0.023472	-0.234466	0.041	0.117	1	Two-sided Wilcoxon test	0.25	5
Chaf1b	0.0235502	-0.223895	0.01	0.07	1	Two-sided Wilcoxon test	0.25	5
Pdk3	0.02358	0.259161	0.296	0.191	1	Two-sided Wilcoxon test	0.25	5
Zfp280c	0.0236969	0.0585835	0.112	0.05	1	Two-sided Wilcoxon test	0.25	5
Crybg3	0.0237152	-0.427595	0.204	0.302	1	Two-sided Wilcoxon test	0.25	5
Pan3	0.0237937	0.155549	0.153	0.078	1	Two-sided Wilcoxon test	0.25	5
Chm	0.02398	0.128361	0.184	0.1	1	Two-sided Wilcoxon test	0.25	5
Tbxa2r	0.0240092	-0.176553	0	0.05	1	Two-sided Wilcoxon test	0.25	5
Vipas39	0.0240092	-0.176215	0	0.05	1	Two-sided Wilcoxon test	0.25	5
Fbxo40	0.0240092	-0.151967	0	0.05	1	Two-sided Wilcoxon test	0.25	5
Psip1	0.0241272	-0.426289	0.48	0.559	1	Two-sided Wilcoxon test	0.25	5
Eps15	0.0241382	0.152974	0.153	0.078	1	Two-sided Wilcoxon test	0.25	5
Smu1	0.0242137	-0.419381	0.143	0.239	1	Two-sided Wilcoxon test	0.25	5
Bcl11a	0.0242599	0.231731	0.173	0.096	1	Two-sided Wilcoxon test	0.25	5
Gm20732	0.0242977	0.1281	0.071	0.026	1	Two-sided Wilcoxon test	0.25	5
Sec24a	0.0244153	0.258709	0.122	0.059	1	Two-sided Wilcoxon test	0.25	5
Endog	0.024421	0.250117	0.173	0.096	1	Two-sided Wilcoxon test	0.25	5
Khdc4	0.0244263	0.103228	0.112	0.05	1	Two-sided Wilcoxon test	0.25	5
Pbrm1	0.0244433	-0.441428	0.469	0.535	1	Two-sided Wilcoxon test	0.25	5
Dctn6	0.0248459	0.0872457	0.204	0.113	1	Two-sided Wilcoxon test	0.25	5
Cnot7	0.0249098	0.149035	0.194	0.109	1	Two-sided Wilcoxon test	0.25	5
Mpc1	0.0250387	0.209348	0.398	0.267	1	Two-sided Wilcoxon test	0.25	5
Col4a5	0.0250975	-0.314393	0.143	0.248	1	Two-sided Wilcoxon test	0.25	5
Nadk2	0.0251898	-0.354684	0.173	0.276	1	Two-sided Wilcoxon test	0.25	5
Frmd8	0.02527	0.0937327	0.133	0.063	1	Two-sided Wilcoxon test	0.25	5
Ahcyl2	0.025301	0.0728878	0.122	0.057	1	Two-sided Wilcoxon test	0.25	5
Tcea1	0.025484	-0.451032	0.245	0.343	1	Two-sided Wilcoxon test	0.25	5
Kdm5d	0.0255372	-0.202379	0.01	0.067	1	Two-sided Wilcoxon test	0.25	5
Enpp5	0.0255671	0.127401	0.051	0.015	1	Two-sided Wilcoxon test	0.25	5
Hsd17b4	0.0256989	-0.324425	0.153	0.252	1	Two-sided Wilcoxon test	0.25	5
Chmp5	0.0257274	0.15963	0.316	0.204	1	Two-sided Wilcoxon test	0.25	5
Smarcc1	0.0257344	-0.342669	0.459	0.552	1	Two-sided Wilcoxon test	0.25	5
Notch2	0.0257506	0.144047	0.143	0.072	1	Two-sided Wilcoxon test	0.25	5
Kmt2a	0.0258057	-0.404289	0.153	0.246	1	Two-sided Wilcoxon test	0.25	5
Ppp6r2	0.0258786	0.19589	0.092	0.039	1	Two-sided Wilcoxon test	0.25	5
Pou2f1	0.0258821	0.368721	0.184	0.109	1	Two-sided Wilcoxon test	0.25	5
Lamb1	0.0259268	-0.332057	0.214	0.335	1	Two-sided Wilcoxon test	0.25	5
Sorbs2	0.0259535	-0.21252	0.48	0.622	1	Two-sided Wilcoxon test	0.25	5
Arhgap24	0.026012	0.116761	0.071	0.026	1	Two-sided Wilcoxon test	0.25	5
Nipsnap3b	0.0260939	-0.350315	0.112	0.2	1	Two-sided Wilcoxon test	0.25	5
Mid1	0.0261492	0.181585	0.122	0.059	1	Two-sided Wilcoxon test	0.25	5
Serpinb6b	0.0262211	0.180535	0.082	0.033	1	Two-sided Wilcoxon test	0.25	5
Kcnh7	0.0262696	0.245072	0.194	0.111	1	Two-sided Wilcoxon test	0.25	5
Fancc	0.0263009	0.120327	0.051	0.015	1	Two-sided Wilcoxon test	0.25	5
Prkra	0.0263742	0.126411	0.184	0.1	1	Two-sided Wilcoxon test	0.25	5
Nup205	0.026448	-0.394578	0.143	0.235	1	Two-sided Wilcoxon test	0.25	5
Akap11	0.0264667	-0.3775	0.133	0.226	1	Two-sided Wilcoxon test	0.25	5
Ddx6	0.0265763	-0.438067	0.459	0.515	1	Two-sided Wilcoxon test	0.25	5
Pomgnt1	0.0265917	-0.265398	0.041	0.113	1	Two-sided Wilcoxon test	0.25	5
Tmc4	0.0266746	0.126278	0.051	0.015	1	Two-sided Wilcoxon test	0.25	5
Stag1	0.0267662	0.322123	0.388	0.265	1	Two-sided Wilcoxon test	0.25	5
Irf2	0.0269043	0.133166	0.082	0.033	1	Two-sided Wilcoxon test	0.25	5
Zfp414	0.0269077	0.0813212	0.071	0.026	1	Two-sided Wilcoxon test	0.25	5
Arl15	0.0269343	0.180741	0.173	0.093	1	Two-sided Wilcoxon test	0.25	5
Mrps27	0.0269869	-0.415807	0.163	0.254	1	Two-sided Wilcoxon test	0.25	5
Nsdhl	0.0270013	0.165472	0.122	0.059	1	Two-sided Wilcoxon test	0.25	5
Samd1	0.0270229	-0.188262	0.02	0.085	1	Two-sided Wilcoxon test	0.25	5
Bin1	0.0270528	0.118561	0.051	0.015	1	Two-sided Wilcoxon test	0.25	5
Fbxo4	0.0270595	0.08587	0.071	0.026	1	Two-sided Wilcoxon test	0.25	5
Eif3c	0.0271531	-0.403164	0.622	0.646	1	Two-sided Wilcoxon test	0.25	5
Zbtb17	0.0271818	0.222451	0.082	0.033	1	Two-sided Wilcoxon test	0.25	5
Cdkn1a	0.0271818	0.164807	0.082	0.033	1	Two-sided Wilcoxon test	0.25	5
Fam207a	0.027212	0.101545	0.143	0.072	1	Two-sided Wilcoxon test	0.25	5
Zranb2	0.027335	0.176137	0.449	0.317	1	Two-sided Wilcoxon test	0.25	5
Anapc15	0.0274264	0.31343	0.224	0.139	1	Two-sided Wilcoxon test	0.25	5
Ccdc32	0.0274421	0.0415766	0.122	0.057	1	Two-sided Wilcoxon test	0.25	5
Rfk	0.0275655	0.126675	0.133	0.065	1	Two-sided Wilcoxon test	0.25	5
Gm15892	0.0276289	0.0481587	0.051	0.015	1	Two-sided Wilcoxon test	0.25	5
AW549877	0.0276626	-0.330644	0.051	0.124	1	Two-sided Wilcoxon test	0.25	5
Zfp710	0.0277665	0.233634	0.122	0.059	1	Two-sided Wilcoxon test	0.25	5
Mgat5	0.0278438	0.179862	0.112	0.052	1	Two-sided Wilcoxon test	0.25	5
Rpl18	0.0279774	0.266177	0.959	0.959	1	Two-sided Wilcoxon test	0.25	5
Dhrs1	0.0279886	0.15787	0.133	0.065	1	Two-sided Wilcoxon test	0.25	5
Ccndbp1	0.0280293	0.0827343	0.082	0.033	1	Two-sided Wilcoxon test	0.25	5
Brd3	0.0280296	-0.306027	0.194	0.298	1	Two-sided Wilcoxon test	0.25	5
Pigyl	0.0281001	0.136613	0.122	0.059	1	Two-sided Wilcoxon test	0.25	5
Shc1	0.0281016	0.214297	0.143	0.074	1	Two-sided Wilcoxon test	0.25	5
Dlst	0.0281352	-0.379895	0.388	0.452	1	Two-sided Wilcoxon test	0.25	5
Psmf1	0.0281728	0.110148	0.082	0.033	1	Two-sided Wilcoxon test	0.25	5
Stard13	0.0282155	0.0422507	0.051	0.015	1	Two-sided Wilcoxon test	0.25	5
Rchy1	0.0283566	-0.257672	0.031	0.098	1	Two-sided Wilcoxon test	0.25	5
Zfp580	0.0284134	0.0494271	0.051	0.015	1	Two-sided Wilcoxon test	0.25	5
Dlg3	0.0284597	0.0377803	0.071	0.026	1	Two-sided Wilcoxon test	0.25	5
Nynrin	0.0284633	-0.379226	0.153	0.248	1	Two-sided Wilcoxon test	0.25	5
Fgl2	0.0285365	-0.194122	0.02	0.085	1	Two-sided Wilcoxon test	0.25	5
Polr2l	0.0285503	0.0937812	0.122	0.059	1	Two-sided Wilcoxon test	0.25	5
Lca5	0.0285928	0.120246	0.092	0.039	1	Two-sided Wilcoxon test	0.25	5
Fus	0.0285952	-0.300113	0.5	0.587	1	Two-sided Wilcoxon test	0.25	5
Gm48099	0.0286046	-0.317815	0.061	0.141	1	Two-sided Wilcoxon test	0.25	5
Ilkap	0.0287157	0.129989	0.296	0.187	1	Two-sided Wilcoxon test	0.25	5
Rpl14	0.0287262	0.255153	0.918	0.885	1	Two-sided Wilcoxon test	0.25	5
Exosc9	0.028744	0.154046	0.184	0.102	1	Two-sided Wilcoxon test	0.25	5
Gramd3	0.0287445	0.112373	0.143	0.072	1	Two-sided Wilcoxon test	0.25	5
Tmem87a	0.0287777	0.100757	0.122	0.059	1	Two-sided Wilcoxon test	0.25	5
Rhoj	0.0288128	0.0963549	0.051	0.015	1	Two-sided Wilcoxon test	0.25	5
Rmnd5a	0.0288703	0.155517	0.255	0.159	1	Two-sided Wilcoxon test	0.25	5
Clk1	0.0289948	0.159787	0.173	0.096	1	Two-sided Wilcoxon test	0.25	5
Fstl4	0.0290066	0.155703	0.122	0.059	1	Two-sided Wilcoxon test	0.25	5
Zscan2	0.0290143	0.0161107	0.051	0.015	1	Two-sided Wilcoxon test	0.25	5
Gk	0.0290314	0.145113	0.112	0.052	1	Two-sided Wilcoxon test	0.25	5
Rgs6	0.0290468	0.192417	0.082	0.033	1	Two-sided Wilcoxon test	0.25	5
Ybx1	0.0290875	0.407226	0.918	0.9	1	Two-sided Wilcoxon test	0.25	5
Smc4	0.0290937	-0.486889	0.337	0.433	1	Two-sided Wilcoxon test	0.25	5
Rere	0.0291151	0.328601	0.408	0.307	1	Two-sided Wilcoxon test	0.25	5
Ddx3y	0.0291514	-0.293373	0.102	0.193	1	Two-sided Wilcoxon test	0.25	5
Cenpe	0.0291787	-0.497196	0.194	0.287	1	Two-sided Wilcoxon test	0.25	5
Lyn	0.0291989	0.184978	0.102	0.046	1	Two-sided Wilcoxon test	0.25	5
Ncapd2	0.0292104	-0.390027	0.133	0.22	1	Two-sided Wilcoxon test	0.25	5
Ftl1-ps1	0.029217	0.0310048	0.051	0.015	1	Two-sided Wilcoxon test	0.25	5
Slc2a3	0.0292859	-0.343685	0.051	0.126	1	Two-sided Wilcoxon test	0.25	5
Itgb1bp1	0.0293278	0.132721	0.102	0.046	1	Two-sided Wilcoxon test	0.25	5
Pcsk5	0.0293433	0.0883795	0.082	0.033	1	Two-sided Wilcoxon test	0.25	5
Crabp1	0.0294693	0.118319	0.122	0.059	1	Two-sided Wilcoxon test	0.25	5
Kpna2	0.0294825	-0.282208	0.061	0.141	1	Two-sided Wilcoxon test	0.25	5
Ube2d3	0.0295186	0.343376	0.5	0.402	1	Two-sided Wilcoxon test	0.25	5
Gm5617	0.0297174	0.113234	0.102	0.046	1	Two-sided Wilcoxon test	0.25	5
Trps1	0.0297359	0.220813	0.133	0.067	1	Two-sided Wilcoxon test	0.25	5
Plekhg2	0.0297646	0.111694	0.112	0.052	1	Two-sided Wilcoxon test	0.25	5
Ppp4c	0.029785	0.112813	0.153	0.08	1	Two-sided Wilcoxon test	0.25	5
Cdh2	0.0298721	-0.320234	0.5	0.604	1	Two-sided Wilcoxon test	0.25	5
Mrps24	0.0299067	0.198121	0.398	0.28	1	Two-sided Wilcoxon test	0.25	5
Polb	0.0299487	0.0889669	0.184	0.1	1	Two-sided Wilcoxon test	0.25	5
Rprd1a	0.0299771	0.113935	0.204	0.115	1	Two-sided Wilcoxon test	0.25	5
Ubac2	0.0299875	0.201893	0.235	0.143	1	Two-sided Wilcoxon test	0.25	5
Hdgfl3	0.0302014	0.164658	0.194	0.113	1	Two-sided Wilcoxon test	0.25	5
Atg14	0.0302513	0.0918564	0.092	0.039	1	Two-sided Wilcoxon test	0.25	5
B4gat1	0.0302705	-0.322449	0.041	0.109	1	Two-sided Wilcoxon test	0.25	5
A930005H10Rik	0.0303766	0.0959285	0.102	0.046	1	Two-sided Wilcoxon test	0.25	5
Fam102b	0.0304015	0.0706346	0.082	0.033	1	Two-sided Wilcoxon test	0.25	5
Phf8	0.0304136	0.156335	0.122	0.059	1	Two-sided Wilcoxon test	0.25	5
Ddx46	0.0304259	-0.402463	0.265	0.354	1	Two-sided Wilcoxon test	0.25	5
Pdlim5	0.0304436	0.28145	0.653	0.574	1	Two-sided Wilcoxon test	0.25	5
Bmp5	0.0304581	0.187267	0.122	0.061	1	Two-sided Wilcoxon test	0.25	5
Ptgfrn	0.0304836	-0.501988	0.214	0.298	1	Two-sided Wilcoxon test	0.25	5
Atp5o	0.0304884	0.341277	0.837	0.807	1	Two-sided Wilcoxon test	0.25	5
Acd	0.0305356	0.112111	0.092	0.039	1	Two-sided Wilcoxon test	0.25	5
Cmpk1	0.0305959	0.0869205	0.286	0.178	1	Two-sided Wilcoxon test	0.25	5
Zc3h15	0.030597	-0.409898	0.378	0.461	1	Two-sided Wilcoxon test	0.25	5
Ube2w	0.0306583	0.196542	0.194	0.113	1	Two-sided Wilcoxon test	0.25	5
Pdcd2l	0.0306786	0.0839461	0.092	0.039	1	Two-sided Wilcoxon test	0.25	5
Rin2	0.0307099	0.0852338	0.082	0.033	1	Two-sided Wilcoxon test	0.25	5
Ift46	0.0307099	0.0379084	0.082	0.033	1	Two-sided Wilcoxon test	0.25	5
Fn1	0.0308422	-0.329853	0.224	0.335	1	Two-sided Wilcoxon test	0.25	5
Zfp397	0.0308944	0.0958925	0.112	0.052	1	Two-sided Wilcoxon test	0.25	5
Nab1	0.0310545	0.129144	0.184	0.104	1	Two-sided Wilcoxon test	0.25	5
Dcaf5	0.0311388	0.0761621	0.122	0.059	1	Two-sided Wilcoxon test	0.25	5
Tmem218	0.0311774	0.0671147	0.082	0.033	1	Two-sided Wilcoxon test	0.25	5
Irx3	0.03124	-0.204712	0.041	0.115	1	Two-sided Wilcoxon test	0.25	5
Pank3	0.0312857	0.312276	0.204	0.124	1	Two-sided Wilcoxon test	0.25	5
Runx1t1	0.0313968	0.0870168	0.265	0.163	1	Two-sided Wilcoxon test	0.25	5
Txn1	0.0315408	0.296942	0.714	0.598	1	Two-sided Wilcoxon test	0.25	5
Eml5	0.0315488	0.0873849	0.092	0.039	1	Two-sided Wilcoxon test	0.25	5
Ola1	0.0316864	-0.429753	0.327	0.402	1	Two-sided Wilcoxon test	0.25	5
Adh5	0.0316995	-0.377724	0.306	0.389	1	Two-sided Wilcoxon test	0.25	5
Ube2e2	0.0316996	0.154236	0.204	0.12	1	Two-sided Wilcoxon test	0.25	5
Ncbp3	0.031752	-0.394506	0.092	0.174	1	Two-sided Wilcoxon test	0.25	5
Cib1	0.0318711	-0.167343	0.01	0.065	1	Two-sided Wilcoxon test	0.25	5
Celf1	0.0318997	-0.294635	0.49	0.6	1	Two-sided Wilcoxon test	0.25	5
Pcbp2	0.0319036	0.223861	0.622	0.509	1	Two-sided Wilcoxon test	0.25	5
Gm15543	0.0319647	0.22629	0.071	0.028	1	Two-sided Wilcoxon test	0.25	5
Dync2li1	0.0320101	0.056728	0.102	0.046	1	Two-sided Wilcoxon test	0.25	5
Mrps10	0.0321201	0.216639	0.245	0.152	1	Two-sided Wilcoxon test	0.25	5
Fgd1	0.0321307	0.0373316	0.082	0.033	1	Two-sided Wilcoxon test	0.25	5
Scaper	0.0321497	0.221121	0.163	0.091	1	Two-sided Wilcoxon test	0.25	5
Ufd1	0.0322138	-0.337282	0.061	0.135	1	Two-sided Wilcoxon test	0.25	5
Vdac1	0.03227	-0.225763	0.755	0.785	1	Two-sided Wilcoxon test	0.25	5
Riox1	0.0323498	-0.283867	0.041	0.111	1	Two-sided Wilcoxon test	0.25	5
Tvp23b	0.0325162	-0.299253	0.082	0.165	1	Two-sided Wilcoxon test	0.25	5
Tubgcp3	0.0325677	0.13477	0.153	0.083	1	Two-sided Wilcoxon test	0.25	5
Garem1	0.032742	0.0638659	0.092	0.039	1	Two-sided Wilcoxon test	0.25	5
Rnpc3	0.0328547	0.0963912	0.102	0.046	1	Two-sided Wilcoxon test	0.25	5
Mcl1	0.0329823	-0.376877	0.306	0.389	1	Two-sided Wilcoxon test	0.25	5
Tpm1	0.0331514	0.332859	1	0.998	1	Two-sided Wilcoxon test	0.25	5
Ppp1r1a	0.0331846	0.237538	0.265	0.17	1	Two-sided Wilcoxon test	0.25	5
Rel	0.0331992	0.0539484	0.092	0.039	1	Two-sided Wilcoxon test	0.25	5
Csrp2	0.0333006	0.409937	0.755	0.654	1	Two-sided Wilcoxon test	0.25	5
Stn1	0.0333848	-0.220255	0.01	0.063	1	Two-sided Wilcoxon test	0.25	5
Itm2c	0.0335091	-0.366279	0.214	0.313	1	Two-sided Wilcoxon test	0.25	5
Son	0.0335291	-0.296226	0.622	0.665	1	Two-sided Wilcoxon test	0.25	5
Knop1	0.0336271	-0.494972	0.265	0.35	1	Two-sided Wilcoxon test	0.25	5
Styx	0.0337371	0.0888929	0.061	0.022	1	Two-sided Wilcoxon test	0.25	5
Dnaja1	0.0337907	-0.359241	0.663	0.72	1	Two-sided Wilcoxon test	0.25	5
Zfp280d	0.0338442	0.123124	0.224	0.135	1	Two-sided Wilcoxon test	0.25	5
Zdhhc6	0.0340421	0.073923	0.153	0.08	1	Two-sided Wilcoxon test	0.25	5
Mcm5	0.0341895	-0.272501	0.112	0.209	1	Two-sided Wilcoxon test	0.25	5
Arih2	0.0342192	0.103882	0.133	0.067	1	Two-sided Wilcoxon test	0.25	5
Tax1bp3	0.0342347	0.241505	0.327	0.224	1	Two-sided Wilcoxon test	0.25	5
Cox14	0.034442	0.24544	0.378	0.265	1	Two-sided Wilcoxon test	0.25	5
Kcng2	0.0344815	-0.384876	0.398	0.454	1	Two-sided Wilcoxon test	0.25	5
Golt1b	0.0345067	0.180153	0.184	0.107	1	Two-sided Wilcoxon test	0.25	5
Cltc	0.0345185	-0.378372	0.582	0.622	1	Two-sided Wilcoxon test	0.25	5
Farp1	0.0345491	0.130346	0.224	0.135	1	Two-sided Wilcoxon test	0.25	5
Vps13b	0.0346137	0.188889	0.204	0.122	1	Two-sided Wilcoxon test	0.25	5
Cdc34	0.0346332	0.0944295	0.204	0.117	1	Two-sided Wilcoxon test	0.25	5
Eml2	0.0347392	-0.300194	0.082	0.165	1	Two-sided Wilcoxon test	0.25	5
Adamtsl1	0.0347495	0.0737673	0.061	0.022	1	Two-sided Wilcoxon test	0.25	5
Cdk2ap1	0.0348589	0.0812193	0.153	0.08	1	Two-sided Wilcoxon test	0.25	5
Ptprj	0.0349551	0.108216	0.061	0.022	1	Two-sided Wilcoxon test	0.25	5
Ubash3b	0.0350287	-0.2583	0.031	0.093	1	Two-sided Wilcoxon test	0.25	5
Ap1b1	0.0350287	-0.255494	0.031	0.093	1	Two-sided Wilcoxon test	0.25	5
Tpgs2	0.035042	0.212	0.143	0.076	1	Two-sided Wilcoxon test	0.25	5
Cisd2	0.0350734	0.11636	0.276	0.176	1	Two-sided Wilcoxon test	0.25	5
Dab2ip	0.0350985	-0.366451	0.276	0.378	1	Two-sided Wilcoxon test	0.25	5
Kcnq3	0.0351617	0.123856	0.061	0.022	1	Two-sided Wilcoxon test	0.25	5
Man2a2	0.0352398	0.151376	0.102	0.048	1	Two-sided Wilcoxon test	0.25	5
Cacna1a	0.0352398	0.173887	0.102	0.048	1	Two-sided Wilcoxon test	0.25	5
Enah	0.0353195	0.241659	0.378	0.274	1	Two-sided Wilcoxon test	0.25	5
Sf3b4	0.0354848	0.150603	0.204	0.12	1	Two-sided Wilcoxon test	0.25	5
Grk5	0.035525	0.197093	0.133	0.07	1	Two-sided Wilcoxon test	0.25	5
Asns	0.0355347	0.0750835	0.143	0.074	1	Two-sided Wilcoxon test	0.25	5
1500035N22Rik	0.035578	0.0800892	0.061	0.022	1	Two-sided Wilcoxon test	0.25	5
1190005I06Rik	0.035578	0.0489708	0.061	0.022	1	Two-sided Wilcoxon test	0.25	5
Ccdc124	0.03563	0.127764	0.286	0.18	1	Two-sided Wilcoxon test	0.25	5
Usp9x	0.0356577	-0.390413	0.5	0.561	1	Two-sided Wilcoxon test	0.25	5
Cdh20	0.0357878	0.0856988	0.061	0.022	1	Two-sided Wilcoxon test	0.25	5
Hmgb2	0.0359226	-0.333618	0.745	0.807	1	Two-sided Wilcoxon test	0.25	5
Eif3h	0.0359438	0.101477	0.612	0.478	1	Two-sided Wilcoxon test	0.25	5
Neb	0.0359986	0.097139	0.061	0.022	1	Two-sided Wilcoxon test	0.25	5
Atxn7l1	0.0359986	0.0711427	0.061	0.022	1	Two-sided Wilcoxon test	0.25	5
Man2c1	0.0360107	0.125126	0.133	0.067	1	Two-sided Wilcoxon test	0.25	5
Spryd7	0.0360654	0.11819	0.122	0.061	1	Two-sided Wilcoxon test	0.25	5
Setx	0.0360826	-0.457708	0.153	0.233	1	Two-sided Wilcoxon test	0.25	5
Fbxo5	0.0361001	-0.318699	0.071	0.148	1	Two-sided Wilcoxon test	0.25	5
Snrpb2	0.0361482	0.0891934	0.357	0.235	1	Two-sided Wilcoxon test	0.25	5
Trdn	0.036317	-0.40211	0.398	0.483	1	Two-sided Wilcoxon test	0.25	5
Pakap.1	0.0363801	-0.306005	0.469	0.596	1	Two-sided Wilcoxon test	0.25	5
Yju2	0.0364233	0.0524822	0.061	0.022	1	Two-sided Wilcoxon test	0.25	5
Fam210b	0.0365573	0.20116	0.122	0.063	1	Two-sided Wilcoxon test	0.25	5
Taf13	0.0365813	0.0507147	0.163	0.087	1	Two-sided Wilcoxon test	0.25	5
Ltbp3	0.0366373	0.0547196	0.061	0.022	1	Two-sided Wilcoxon test	0.25	5
Ints4	0.0367198	0.104218	0.112	0.054	1	Two-sided Wilcoxon test	0.25	5
Ing2	0.0368721	-0.322384	0.041	0.107	1	Two-sided Wilcoxon test	0.25	5
Gm49708	0.0369045	-0.175703	0.01	0.063	1	Two-sided Wilcoxon test	0.25	5
Pkia	0.0371449	0.175387	0.173	0.1	1	Two-sided Wilcoxon test	0.25	5
Fyco1	0.0371893	-0.419009	0.122	0.207	1	Two-sided Wilcoxon test	0.25	5
Uba1	0.0372591	-0.406521	0.418	0.483	1	Two-sided Wilcoxon test	0.25	5
Dnph1	0.0372606	0.00901521	0.112	0.052	1	Two-sided Wilcoxon test	0.25	5
Cdk8	0.0372956	0.295634	0.582	0.446	1	Two-sided Wilcoxon test	0.25	5
Snapc3	0.0373388	0.096255	0.133	0.067	1	Two-sided Wilcoxon test	0.25	5
Prpsap1	0.0374335	0.103886	0.173	0.096	1	Two-sided Wilcoxon test	0.25	5
Pycr1	0.0374732	0.121248	0.071	0.028	1	Two-sided Wilcoxon test	0.25	5
Srr	0.0374732	0.129296	0.071	0.028	1	Two-sided Wilcoxon test	0.25	5
Smim8	0.037502	0.202092	0.143	0.078	1	Two-sided Wilcoxon test	0.25	5
Gas5	0.037513	0.200502	0.582	0.487	1	Two-sided Wilcoxon test	0.25	5
Ppat	0.0376724	-0.404075	0.184	0.267	1	Two-sided Wilcoxon test	0.25	5
Dusp3	0.0376993	0.145782	0.224	0.135	1	Two-sided Wilcoxon test	0.25	5
Tmem9	0.0377154	0.227685	0.194	0.115	1	Two-sided Wilcoxon test	0.25	5
Eif4b	0.0377161	-0.269658	0.398	0.526	1	Two-sided Wilcoxon test	0.25	5
Nmnat1	0.0377234	0.0487707	0.061	0.022	1	Two-sided Wilcoxon test	0.25	5
Samd4b	0.0377387	0.106747	0.153	0.083	1	Two-sided Wilcoxon test	0.25	5
Dusp27	0.0377844	-0.307634	0.163	0.261	1	Two-sided Wilcoxon test	0.25	5
Map3k3	0.0378635	-0.0149207	0.112	0.052	1	Two-sided Wilcoxon test	0.25	5
Sh3bgr	0.0381201	0.381913	0.796	0.78	1	Two-sided Wilcoxon test	0.25	5
Pnkd	0.0381564	0.181085	0.408	0.285	1	Two-sided Wilcoxon test	0.25	5
Rif1	0.0381664	-0.420454	0.173	0.259	1	Two-sided Wilcoxon test	0.25	5
Thoc6	0.038213	0.126768	0.224	0.135	1	Two-sided Wilcoxon test	0.25	5
Dek	0.0382131	-0.430063	0.531	0.58	1	Two-sided Wilcoxon test	0.25	5
Stt3b	0.0382371	-0.402935	0.204	0.291	1	Two-sided Wilcoxon test	0.25	5
Agpat4	0.0382573	0.121001	0.082	0.035	1	Two-sided Wilcoxon test	0.25	5
Kat7	0.0383417	0.23445	0.204	0.122	1	Two-sided Wilcoxon test	0.25	5
Tcf7l1	0.0383551	0.153638	0.112	0.054	1	Two-sided Wilcoxon test	0.25	5
Sncaip	0.0383881	0.0297161	0.061	0.022	1	Two-sided Wilcoxon test	0.25	5
Pip5k1c	0.0384155	0.15203	0.092	0.041	1	Two-sided Wilcoxon test	0.25	5
Sufu	0.0384563	0.0801964	0.122	0.061	1	Two-sided Wilcoxon test	0.25	5
Cep63	0.0384921	0.0573415	0.143	0.074	1	Two-sided Wilcoxon test	0.25	5
Kcmf1	0.0385841	0.0858752	0.296	0.189	1	Two-sided Wilcoxon test	0.25	5
BC005537	0.0386344	-0.347185	0.153	0.235	1	Two-sided Wilcoxon test	0.25	5
Ctcf	0.038699	-0.409805	0.184	0.272	1	Two-sided Wilcoxon test	0.25	5
Ak2	0.0387028	-0.432682	0.255	0.333	1	Two-sided Wilcoxon test	0.25	5
Fgfr1op2	0.0387804	0.191192	0.286	0.187	1	Two-sided Wilcoxon test	0.25	5
Coa4	0.0389873	0.0863709	0.133	0.067	1	Two-sided Wilcoxon test	0.25	5
Zfhx4	0.0390627	0.0520833	0.061	0.022	1	Two-sided Wilcoxon test	0.25	5
Snx1	0.0391001	-0.262747	0.02	0.076	1	Two-sided Wilcoxon test	0.25	5
Abr	0.0391001	0.232692	0.112	0.057	1	Two-sided Wilcoxon test	0.25	5
Rictor	0.0392067	0.328202	0.153	0.087	1	Two-sided Wilcoxon test	0.25	5
5031425E22Rik	0.0392757	0.0843796	0.071	0.028	1	Two-sided Wilcoxon test	0.25	5
Api5	0.0393496	-0.257186	0.153	0.248	1	Two-sided Wilcoxon test	0.25	5
Efcab14	0.0393684	0.126596	0.184	0.107	1	Two-sided Wilcoxon test	0.25	5
Egr1	0.0396025	0.143272	0.184	0.107	1	Two-sided Wilcoxon test	0.25	5
Sdf4	0.0396113	0.127907	0.255	0.159	1	Two-sided Wilcoxon test	0.25	5
Rpl7	0.0396284	0.283641	0.929	0.95	1	Two-sided Wilcoxon test	0.25	5
Tmem219	0.0396861	0.0688366	0.071	0.028	1	Two-sided Wilcoxon test	0.25	5
Tspan14	0.0396861	0.0726903	0.071	0.028	1	Two-sided Wilcoxon test	0.25	5
D5Ertd579e	0.0398241	-0.303042	0.133	0.222	1	Two-sided Wilcoxon test	0.25	5
Mrps17	0.0398677	0.157125	0.357	0.241	1	Two-sided Wilcoxon test	0.25	5
Dlat	0.0398903	-0.398865	0.316	0.387	1	Two-sided Wilcoxon test	0.25	5
Trp53rkb	0.0399352	0.101353	0.082	0.035	1	Two-sided Wilcoxon test	0.25	5
Ank	0.0399549	0.0878224	0.102	0.048	1	Two-sided Wilcoxon test	0.25	5
Tbl1xr1	0.0399805	0.11844	0.163	0.091	1	Two-sided Wilcoxon test	0.25	5
Tuba1a	0.0400291	0.253202	0.684	0.648	1	Two-sided Wilcoxon test	0.25	5
Gprin3	0.0401001	0.0911568	0.071	0.028	1	Two-sided Wilcoxon test	0.25	5
Adi1	0.0401001	0.087277	0.071	0.028	1	Two-sided Wilcoxon test	0.25	5
Pgp	0.0402052	-0.409022	0.306	0.383	1	Two-sided Wilcoxon test	0.25	5
Wnt5a	0.0402304	-0.406359	0.112	0.191	1	Two-sided Wilcoxon test	0.25	5
Bex2	0.0402813	0.172519	0.265	0.172	1	Two-sided Wilcoxon test	0.25	5
Elk1	0.0403085	0.0793438	0.071	0.028	1	Two-sided Wilcoxon test	0.25	5
Coprs	0.0403096	0.222923	0.235	0.148	1	Two-sided Wilcoxon test	0.25	5
Clspn	0.0403155	-0.38135	0.092	0.172	1	Two-sided Wilcoxon test	0.25	5
Lrrc41	0.040348	0.161506	0.153	0.085	1	Two-sided Wilcoxon test	0.25	5
Mmd	0.0404522	0.279301	0.286	0.193	1	Two-sided Wilcoxon test	0.25	5
Lamtor2	0.0405396	0.2083	0.398	0.283	1	Two-sided Wilcoxon test	0.25	5
Fkbp1a	0.040648	0.305779	0.755	0.707	1	Two-sided Wilcoxon test	0.25	5
Ndufa1	0.0407094	0.266709	0.276	0.178	1	Two-sided Wilcoxon test	0.25	5
Tiprl	0.0407536	-0.433758	0.204	0.28	1	Two-sided Wilcoxon test	0.25	5
E130308A19Rik	0.0407694	0.0368902	0.194	0.113	1	Two-sided Wilcoxon test	0.25	5
Nelfe	0.0408074	0.120634	0.163	0.091	1	Two-sided Wilcoxon test	0.25	5
Slc16a1	0.0408363	-0.385518	0.173	0.257	1	Two-sided Wilcoxon test	0.25	5
Tpmt	0.040894	0.127792	0.082	0.035	1	Two-sided Wilcoxon test	0.25	5
Spire1	0.040894	0.10528	0.082	0.035	1	Two-sided Wilcoxon test	0.25	5
Ado	0.0409116	-0.274047	0.061	0.133	1	Two-sided Wilcoxon test	0.25	5
Slc44a1	0.041026	0.191261	0.102	0.05	1	Two-sided Wilcoxon test	0.25	5
Rasa2	0.041129	0.0788716	0.102	0.048	1	Two-sided Wilcoxon test	0.25	5
Gpank1	0.0411513	0.0571317	0.071	0.028	1	Two-sided Wilcoxon test	0.25	5
Spcs1	0.04119	0.234185	0.327	0.222	1	Two-sided Wilcoxon test	0.25	5
Ddx17	0.0411973	-0.231447	0.429	0.517	1	Two-sided Wilcoxon test	0.25	5
Dus1l	0.0412302	0.108741	0.092	0.041	1	Two-sided Wilcoxon test	0.25	5
Lrmda	0.0414786	0.0994896	0.082	0.035	1	Two-sided Wilcoxon test	0.25	5
Mrps18a	0.0415377	0.11705	0.245	0.152	1	Two-sided Wilcoxon test	0.25	5
Tmem165	0.041555	-0.400462	0.143	0.224	1	Two-sided Wilcoxon test	0.25	5
Fam114a2	0.0416342	0.254274	0.255	0.17	1	Two-sided Wilcoxon test	0.25	5
Lama4	0.0419326	-0.423414	0.276	0.361	1	Two-sided Wilcoxon test	0.25	5
Cdca8	0.0420637	0.149866	0.51	0.385	1	Two-sided Wilcoxon test	0.25	5
Smoc2	0.0421344	0.243613	0.051	0.017	1	Two-sided Wilcoxon test	0.25	5
Phf13	0.0422691	0.090029	0.082	0.035	1	Two-sided Wilcoxon test	0.25	5
Bloc1s5	0.0422691	0.082531	0.082	0.035	1	Two-sided Wilcoxon test	0.25	5
[truncated: 6,898 more rows]

## Sheet: EndoV
Supplementary Data 4. DEG in single cell datasets of Rnf20iEC-KO versus control embryos.
[truncated: 12,286 more rows]
