# Supplementary material for: Endothelial RNF20 suppresses endothelial-to-mesenchymal transition and safeguards physiological angiocrine signaling to prevent congenital heart disease
Source: Nat Commun. 2025 Oct 27;16:9480. doi: 10.1038/s41467-025-65291-0 (PMC12559710; doi:10.1038/s41467-025-65291-0)
Supplement: Supplementary file 9 — Supplementary Data 6 [file 41467_2025_65291_MOESM9_ESM.xlsx]

## Sheet: Supplementary Data 6
Supplementary Data 6. Genes exhibiting significant negative correlation with RNF20 levels in TOF patients, based on Spearman correlation analysis. Listed are gene names, correlation coefficients, and associated p-value
Gene Name	RNF20	RNF20_Pvalue
Age	-0.0542516	0.796746
BSA	0.172874	0.408597
VPREB3	-0.752308	1.44205e-05
RVP	0.272292	0.187904
ENSG00000288999	-0.74	2.35634e-05
RNF20	1	NA
ZNF271P	0.303846	0.139777
CUTALP	0.193077	0.35512
LRRC77P	0.273077	0.186585
AFG3L1P	-0.143846	0.49272
RHOB	-0.731538	3.25231e-05
HSPB1	-0.730769	3.34704e-05
ZPLD2P	-0.113846	0.587918
NUDT16L2P	0.286923	0.164343
TMEM198B	0.390769	0.0534326
ENSG00000293486	0.332308	0.104594
ZFP36	-0.716154	5.67469e-05
GJA4	-0.709231	7.20702e-05
CRYZL2P	-0.139231	0.506845
ENSG00000293476	0.387692	0.0555078
CENPBD1P	0.136923	0.513982
PRKY	-0.0976923	0.642241
MRPL54	-0.703077	8.86354e-05
PRSS42P	0.240769	0.246306
ENSG00000293417	-0.140769	0.502115
ENSG00000293339	-0.0738462	0.725733
SMPD4BP	0.0646154	0.758952
ENSG00000293278	0.257692	0.213635
PGAM1P5	0.243846	0.240136
ENSG00000293268	-0.173846	0.405925
ENSG00000293235	0.356923	0.0798657
ENSG00000293232	-0.0538462	0.798235
SSR4P1	0.0838462	0.690283
PNMA8B	-0.702308	9.09249e-05
RGS1	-0.700769	9.56604e-05
ENSG00000293164	0.223846	0.282082
CENPBD2P	0.139231	0.506845
CCN2	-0.686923	0.00014903
RASD1	-0.680769	0.00018013
ENSG00000293057	-0.211538	0.310063
ENSG00000292979	-0.0561538	0.789773
TMEM276	-0.127692	0.543006
FGL2	-0.659231	0.000338193
ENSG00000291233	-0.0892308	0.671449
LAGE3	-0.657692	0.000353094
ENSG00000291207	0.166154	0.427325
ENSG00000291203	0.252308	0.223696
ENSG00000291202	0.291538	0.157362
PNMT	-0.656154	0.000368564
ENSG00000291179	-0.325385	0.112474
RIN3	-0.656154	0.000368564
ENSG00000291174	-0.333077	0.103744
CT75	0.329231	0.108044
STAG3L4	-0.373077	0.0662326
GNA15	-0.654615	0.00038462
NSUN5P1	0.233846	0.260565
AMZ2P1	-0.15	0.474197
ENSG00000291136	0.286154	0.165528
ENSG00000291133	0.325385	0.112474
ENSG00000291132	-0.179231	0.391308
ENSG00000275964	-0.653077	0.000401282
DPY19L2P4	0.0684615	0.745057
ENSG00000269176	-0.652308	0.000409845
ZNF300P1	0.0446154	0.832293
ENSG00000291112	0.220769	0.288922
TRIM16L	-0.292308	0.156219
SNHG33	0.359231	0.0777978
ENSG00000291105	-0.204615	0.326528
ENSG00000291100	0.195385	0.349287
SVIL-AS1	0.343846	0.0923801
SDHAP4	0.305385	0.137682
ENSG00000291089	0.373846	0.0656312
CRYBB2P1	-0.0784615	0.709298
ZNF252P	0.35	0.0863199
ENSG00000291079	-0.202308	0.332131
ENSG00000291078	0.313846	0.126564
ENSG00000291068	-0.190769	0.361011
ENSG00000291055	0.0184615	0.930203
GLUD1P3	0.151538	0.469622
TXLNGY	-0.122402	0.559977
FKBP9P1	0.298462	0.147288
ENSG00000291015	-0.0869231	0.679498
ENSG00000291006	0.290769	0.158511
MRPL12	-0.652308	0.000409845
SLX9	-0.650769	0.000427451
ENSG00000290908	-0.0438462	0.835146
GADD45G	-0.650769	0.000427451
ENSG00000290793	0.0607692	0.77292
CCDC106	-0.65	0.000436498
SDHAP1	0.22	0.290649
CA5BP1	-0.03	0.886802
ZNF542P	0.177692	0.395454
ENSG00000289165	-0.649231	0.00044571
LINC00680	0.297692	0.148384
ADCY10P1	0.173846	0.405925
PLEKHF1	-0.648462	0.000455092
ENSG00000290450	0.188462	0.366957
TSPAN33	-0.647692	0.000464644
ENSG00000290114	0.388462	0.0549832
RPS20P24	-0.646278	0.00048266
ENSG00000290091	0.25	0.228103
ENSG00000290085	0.100769	0.631744
ENSG00000290052	-0.388462	0.0549832
ENSG00000290046	-0.202308	0.332131
ENSG00000290032	-0.227692	0.273677
ENSG00000290021	-0.202308	0.332131
ENSG00000290015	-0.0323077	0.878155
ENSG00000290003	-0.0746154	0.722986
ENSG00000289984	0.0776923	0.712029
ENSG00000289980	0.150769	0.471907
ENSG00000289970	0.0315385	0.881036
ENSG00000289965	-0.195385	0.349287
ENSG00000289954	0.0153846	0.941815
ENSG00000289950	0.321538	0.117036
TBC1D10A	-0.646154	0.000484273
ENSG00000289901	-0.0369231	0.860904
ENSG00000289880	-0.0707692	0.736756
ENSG00000289868	-0.08	0.703848
ENSG00000289858	0.233846	0.260565
ENSG00000289841	0.25	0.228103
ENSG00000289698	-0.262308	0.205258
ENSG00000289629	-0.342308	0.0939437
IUR1	0.368462	0.0699303
ENSG00000289617	-0.0407692	0.846575
SOCS1	-0.645385	0.000494354
ENSG00000289609	0.179231	0.391308
ENSG00000289606	0.216923	0.297618
ENSG00000289579	-0.15	0.474197
LINC03063	-0.0438462	0.835146
ENSG00000289523	-0.0984615	0.63961
ENSG00000289520	0.198462	0.341599
ENSG00000289519	0.133077	0.525983
ENSG00000289516	-0.144615	0.490385
ENSG00000289515	-0.225385	0.278701
ENSG00000289507	0.167692	0.422997
NPPB	-0.640769	0.000558757
ENSG00000289493	-0.0438462	0.835146
ENSG00000289486	0.0730769	0.728484
ENSG00000289474	0.163846	0.433862
ENSG00000289469	-0.181538	0.385137
ENSG00000289451	-0.205385	0.324673
ENSG00000289428	0.256154	0.216478
ENSG00000289421	-0.130769	0.533247
ENSG00000289410	-0.0369231	0.860904
ENSG00000289405	-0.0192308	0.927302
ENSG00000289404	-0.213846	0.304691
ENSG00000289393	-0.0515385	0.806718
UBTD1	-0.64	0.000570169
ENSG00000289370	-0.0723077	0.731238
ENSG00000289361	0.0930769	0.658112
HES4	-0.638462	0.000593602
ENSG00000289327	-0.283077	0.170325
FUOM	-0.636923	0.000617865
ENSG00000289294	0.0407692	0.846575
ENSG00000289281	-0.0484615	0.818063
ENSG00000289268	-0.219231	0.292381
ENSG00000289261	0.208462	0.317317
ENSG00000289254	-0.0630769	0.764531
ENSG00000289250	0.0292308	0.889687
ENSG00000289236	0.179231	0.391308
ENSG00000289225	0.07	0.73952
ENSG00000289223	-0.0169231	0.936008
ENSG00000289216	-0.263846	0.202515
ENSG00000289194	-0.0653846	0.756167
ENSG00000289171	-0.235385	0.257351
TRIB1	-0.630769	0.000723717
ENSG00000289164	-0.0630769	0.764531
ENSG00000289155	-0.0561538	0.789773
ENSG00000289138	0.320769	0.117964
ENSG00000289135	-0.0192308	0.927302
ENSG00000289134	-0.263846	0.202515
ENSG00000289119	0.04	0.849437
ENSG00000289112	-0.256923	0.215054
ENSG00000289106	-0.181538	0.385137
ENSG00000289102	-0.00461538	0.982531
ENSG00000289092	-0.0753846	0.720241
ENSG00000289089	0.336923	0.0995725
ENSG00000289077	0.00307692	0.988354
ENSG00000289061	0.208462	0.317317
ENSG00000289056	-0.0753846	0.720241
ENSG00000289050	0.06	0.775723
ENSG00000289045	0.0123077	0.953438
ENSG00000289043	0.12	0.56776
ENSG00000289042	0.232308	0.263804
LINC01530	0.233077	0.262181
ENSG00000289018	0.267692	0.195769
ENSG00000289009	-0.116923	0.577801
ENSG00000289005	0.179231	0.391308
ENSG00000289004	0.186923	0.370953
ENSG00000289002	-0.111538	0.595556
ISOC2	-0.628462	0.000767273
ENSG00000288994	-0.210769	0.311867
ENSG00000288989	-0.133846	0.523572
ENSG00000288985	0.391538	0.0529234
ENSG00000288983	-0.339231	0.0971302
ENSG00000288982	-0.0784615	0.709298
CEBPD	-0.627692	0.000782287
GPBAR1	-0.625385	0.000828863
APOLD1	-0.625385	0.000828863
ENSG00000288953	-0.0376923	0.858035
ENSG00000288951	-0.00923077	0.96507
BATF3	-0.623846	0.000861227
ENSG00000288946	0.106923	0.610957
ENSG00000288941	0.0684615	0.745057
ENSG00000288927	0.263077	0.203883
ENSG00000288924	-0.0423077	0.840857
RPSA2	-0.0823077	0.695698
ENSG00000288886	-0.256923	0.215054
ENSG00000288880	-0.0461538	0.826595
ENSG00000288873	-0.0915385	0.663435
ENSG00000288868	-0.0369231	0.860904
H2AC19	-0.266923	0.197106
ENSG00000230291	-0.620769	0.000929244
ENSG00000288852	-0.146154	0.485731
ENSG00000288833	0.198462	0.341599
SMAD6	-0.619231	0.000964957
ENSG00000288823	0.0576923	0.784145
ENSG00000288821	0.0924857	0.660156
ENSG00000288818	0.303846	0.139777
ENSG00000288781	-0.161538	0.440453
ENSG00000288776	0.186154	0.372961
ENSG00000288771	-0.0215385	0.918606
ENSG00000288770	-0.0230769	0.912813
ENSG00000288766	0.0169231	0.936008
ADRM1	-0.619231	0.000964957
ENSG00000288743	-0.267692	0.195769
ENSG00000288739	0.187692	0.368952
ENSG00000288736	-0.173077	0.408038
F8A1	0.157692	0.451555
ENSG00000288717	0.0392308	0.852301
ENSG00000288961	-0.618462	0.000983253
ATF5	-0.617692	0.00100185
ENSG00000288659	0.138462	0.509219
ENSG00000288658	0.22	0.290649
ENSG00000288612	0.00230769	0.991265
C8orf44	0.0915385	0.663435
ENSG00000288586	0.111538	0.595556
ENSG00000288559	0.31	0.131534
DUS4L-BCAP29	-0.369231	0.0693033
ENSG00000288093	0.370769	0.0680622
ENSG00000288066	-0.122308	0.560281
ENSG00000288045	-0.115385	0.58285
LMNA	-0.615385	0.00105946
ENSG00000288010	-0.213846	0.304691
ENSG00000287999	-0.0107692	0.959253
ENSG00000287978	0.09	0.668774
ENSG00000287891	-0.0407692	0.846575
ENSG00000287853	-0.371538	0.0674481
ENSG00000287837	0.376923	0.0632674
ENSG00000287829	-0.157692	0.451555
ENSG00000287828	-0.0684615	0.745057
ENSG00000287825	-0.269231	0.193114
ENSG00000287817	0.257692	0.213635
ENSG00000287814	-0.206154	0.322824
DHX9-AS1	-0.08	0.703848
ENSG00000287769	0.283846	0.169117
ENSG00000287745	-0.17552	0.40135
ENSG00000287733	-0.16	0.444876
ENSG00000287710	-0.225385	0.278701
ENSG00000287702	0.00153846	0.994177
ENSG00000287692	-0.302308	0.141894
ENSG00000287658	0.24	0.247865
ENSG00000287568	0.353077	0.0834046
CRACDL	-0.614615	0.00107929
ENSG00000287483	-0.260769	0.208025
ENSG00000287417	0.0376923	0.858035
ENSG00000287382	-0.0376923	0.858035
ENSG00000287315	0.295385	0.151707
ENSG00000287271	0.0930769	0.658112
DRAP1	-0.614615	0.00107929
ENSG00000287255	0.100769	0.631744
ENSG00000287191	0.197692	0.343511
ENSG00000287158	0.350769	0.085584
CDK2AP2	-0.613846	0.00109944
ENSG00000287104	0.239231	0.24943
ENSG00000287103	-0.272308	0.187878
ENSG00000287075	0	1
ENSG00000287047	0.35	0.0863199
ENSG00000287024	-0.263077	0.203883
ENSG00000286977	-0.0123077	0.953438
ENSG00000286964	0.0661538	0.753385
RPS7P3	-0.611538	0.00116184
ENSG00000286873	0.0730769	0.728484
ENSG00000286835	-0.0330769	0.875276
ENSG00000286820	0.298462	0.147288
ENSG00000286800	0.298462	0.147288
ENSG00000286747	0.259231	0.210818
ENSG00000286700	-0.194615	0.351225
ENSG00000286658	0.147692	0.481101
ENSG00000286657	0.2	0.337793
ZNF703	-0.611538	0.00116184
PM20D1-AS1	0.34	0.0963262
ENSG00000286600	-0.0176923	0.933105
ENSG00000286584	-0.113077	0.59046
IL34	-0.611538	0.00116184
PARTICL	-0.0707692	0.736756
ENSG00000286527	0.104615	0.618719
ENSG00000286511	0.31	0.131534
ENSG00000286491	-0.166955	0.425067
ENSG00000286452	-0.0138488	0.947615
ENSG00000286429	-0.127692	0.543006
ENSG00000286408	0.0130769	0.950531
ENSG00000286322	0.0953846	0.650158
ENSG00000286277	-0.203885	0.328294
ENSG00000286264	-0.32	0.118898
ENSG00000286158	-0.0523077	0.803888
ENSG00000286071	0.122308	0.560281
RPL18AP3	-0.610769	0.0011833
ENSG00000286062	-0.234615	0.258955
ENSG00000286039	0.170769	0.414412
ENSG00000286009	-0.305588	0.137407
ENSG00000286001	0.0507692	0.809551
NIPBL-DT	0.148462	0.478794
ENSG00000234513	-0.609733	0.00121277
ENSG00000285914	0.376923	0.0632674
ENSG00000285863	-0.27	0.191796
SAMD4A-AS1	0.290769	0.158511
ENSG00000285745	0.0162163	0.938675
CYGB	-0.608462	0.00124976
ENSG00000285553	0.259231	0.210818
RELA-DT	-0.279231	0.176457
PDGFRL2P	0.213077	0.306475
ENSG00000285412	-0.144615	0.490385
GABPB1-IT1	0.0861538	0.682189
GPX1	-0.604615	0.00136767
ENSG00000285257	-0.0223077	0.915709
ENSG00000285184	0.222308	0.285489
ENSG00000284985	-0.0280823	0.893996
JDP2	-0.603077	0.00141744
EEF1AKMT4	-0.286923	0.164343
ENSG00000284691	0.00538462	0.97962
ENSG00000284672	0.123846	0.55532
ENSG00000284612	0.263077	0.203883
LYNX1-SLURP2	-0.109231	0.603236
ENSG00000284391	-0.0138462	0.947625
MIR4534	0.218951	0.293014
MIR3605	0.271044	0.190016
MSANTD7	0.276154	0.181472
MIR5010	0.0228466	0.91368
ENSG00000283907	-0.0330769	0.875276
ENSG00000283828	0.230769	0.267069
MIR4485	0.209392	0.315113
ENSG00000283662	0.0938462	0.655456
EXOC3L2	-0.294615	0.152826
ENSG00000283566	-0.188607	0.366582
MIR1244-3	-0.340769	0.0955271
ENSG00000283423	0.338722	0.0976646
ATP6V1F	-0.603077	0.00141744
ENSG00000283078	-0.00923077	0.96507
ENSG00000283041	-0.0530769	0.80106
ATP5MC1P2	-0.319231	0.119837
BTF3P16	-0.0315385	0.881036
ENSG00000282917	-0.07	0.73952
PTMAP12	-0.03	0.886802
ENSG00000282556	0.226154	0.27702
LINC01144	-0.0107692	0.959253
CSRNP1	-0.599231	0.00154872
SEPSECS-AS1	-0.386923	0.0560362
ENSG00000281468	-0.286154	0.165528
ENSG00000281383	-0.0392308	0.852301
LINC00997	0.356154	0.0805642
STC1	-0.598462	0.00157619
LINC00921	-0.136923	0.513982
GSEC	0.116923	0.577801
LINC00294	0.00769231	0.970889
PAGR1	0.0453846	0.829443
CCDC163	0.0938462	0.655456
ENSG00000280422	0.133077	0.525983
ENSG00000280339	0.160769	0.442662
ENSG00000280332	0.0792308	0.706571
ENSG00000280323	-0.28	0.175218
ERICD	0.0461538	0.826595
ENSG00000280287	0.236154	0.255754
ENSG00000280254	-0.148462	0.478794
ENSG00000280231	-0.269231	0.193114
ENSG00000280216	0.185385	0.374975
EMILIN1	-0.598462	0.00157619
ENSG00000280212	-0.15	0.474197
ENSG00000280211	0.0123077	0.953438
BAD	-0.596923	0.00163239
ENSG00000280149	0.0623077	0.767325
RPL29P19	-0.596154	0.00166112
ENSG00000280106	0.299231	0.146198
PRR29	-0.596154	0.00166112
ENSG00000280088	0.21	0.313677
ENSG00000280077	-0.0284615	0.892573
ENSG00000280071	0.12	0.56776
ENSG00000280047	-0.193077	0.35512
ENSG00000280033	-0.233846	0.260565
ENSG00000279923	0.0123077	0.953438
ENSG00000279865	-0.321538	0.117036
ENSG00000279861	0.276154	0.181472
ENSG00000279799	-0.242308	0.243208
CCDC167	-0.594615	0.0017199
ENSG00000279673	0.03	0.886802
ENSG00000279672	0.3216	0.116961
ENSG00000279656	0.147692	0.481101
ENSG00000279520	0.0907692	0.666102
ENSG00000279518	0.294615	0.152826
ENSG00000279499	-0.36	0.0771176
ENSG00000279483	-0.282308	0.171539
WASH9P	-0.133077	0.525983
ENSG00000279453	-0.0323077	0.878155
ENSG00000279423	-0.26	0.209418
ENSG00000279392	-0.128462	0.540559
LRRC4B	-0.593846	0.00174995
ENSG00000279348	0.263077	0.203883
ENSG00000279314	0.07	0.73952
NDUFAF2P1	0.126923	0.545459
ENSG00000279265	-0.176923	0.397536
ENSG00000279253	-0.00230769	0.991265
ENSG00000279227	0.253077	0.22224
ENSG00000279140	-0.251538	0.225159
ENSG00000279118	0.386923	0.0560362
ENSG00000279088	-0.0692308	0.742287
SLC2A4RG	-0.593846	0.00174995
ENSG00000279059	0.369231	0.0693033
ENSG00000279041	0.267692	0.195769
ENSG00000278989	0.0969231	0.644876
ENSG00000278974	-0.13	0.535679
HEIH	-0.305385	0.137682
ENSG00000278966	-0.108462	0.605805
ENSG00000278952	0.183846	0.379021
PER1	-0.592308	0.00181141
ENSG00000278922	0.11	0.600672
EPB41L4A-DT	-0.152308	0.467344
BANCR	0.317692	0.121732
ENSG00000278899	-0.0792308	0.706571
ENSG00000278847	-0.279968	0.17527
H3C10	-0.02	0.924403
ENSG00000278817	-0.304615	0.138727
MDK	-0.590769	0.0018747
ENSG00000233778	-0.589231	0.00193988
ENSG00000278765	0.0207692	0.921504
ENSG00000278733	0.0569231	0.786958
Metazoa_SRP	-0.131948	0.529529
ENSG00000278730	0.0630769	0.764531
NKILA	0.05	0.812386
ENSG00000278703	-0.209231	0.315494
ENSG00000278668	-0.189231	0.364969
ENSG00000278642	0.10289	0.624547
RPS12P26	-0.587692	0.00200698
ENSG00000278600	0.283077	0.170325
ENSG00000278576	0.342308	0.0939437
ENSG00000272715	-0.586154	0.00207606
HSPB1P2	-0.586154	0.00207606
ENSG00000278383	-0.208462	0.317317
ENSG00000278376	0.111538	0.595556
H1-10	-0.585385	0.00211135
CKAP2-DT	-0.133077	0.525983
ENSG00000278133	-0.0553846	0.792591
PHLDA1	-0.585385	0.00211135
ENSG00000278126	-0.132308	0.528399
ENSG00000278112	0.140769	0.502115
MIR6757	0.213854	0.304673
ENSG00000278058	-0.277692	0.178952
ENSG00000278000	0.000769231	0.997088
ENSG00000277999	0.167692	0.422997
ENSG00000277998	0.0576923	0.784145
ENSG00000277978	0.0407692	0.846575
ENSG00000277977	0.178599	0.393008
ENSG00000277959	-0.0646154	0.758952
MIR6746	-0.0910121	0.665259
MORN2	-0.584615	0.00214716
ENSG00000277829	-0.381538	0.0598455
ENSG00000277806	0.179231	0.391308
ENSG00000277782	-0.09	0.668774
ENSG00000277744	0.148462	0.478794
TRAC	-0.185385	0.374975
ENSG00000277715	0.0261538	0.90124
ENSG00000277662	-0.0369231	0.860904
ENSG00000277654	-0.336154	0.100397
ENSG00000277566	0.32	0.118898
ENSG00000277543	-0.223846	0.282082
ENSG00000277511	0.0684615	0.745057
GPIHBP1	-0.152308	0.467344
ENSG00000277491	-0.178462	0.393378
ENSG00000277476	-0.370769	0.0680622
ENSG00000277459	-0.125385	0.55038
CEBPB-AS1	0.279231	0.176457
ENSG00000277447	-0.0784615	0.709298
MARCKS	0.0661538	0.753385
MIR8058	0.28151	0.172805
BICRA-AS2	-0.0761538	0.7175
ENSG00000277382	-0.0276923	0.895461
ENSG00000277373	-0.196147	0.347373
ENSG00000277369	-0.326923	0.110686
RAB35-AS1	-0.109231	0.603236
MIR6784	-0.0823077	0.695698
ENSG00000277218	0.115385	0.58285
ENSG00000277196	0.0876923	0.676811
F8A3	-0.178462	0.393378
TYW1B	0.129231	0.538117
ENSG00000277144	-0.116154	0.580323
DPP7	-0.584615	0.00214716
H2AC8	-0.323077	0.115195
MIR6763	0.125409	0.550302
RMRP	0.140027	0.504394
ENSG00000276968	-0.381538	0.0598455
ENSG00000276957	-0.0153846	0.941815
SNHG25	-0.583846	0.00218348
ENSG00000276900	0.04	0.849437
ENSG00000276855	-0.200769	0.335899
ENSG00000276846	0.0976923	0.642241
MIR6730	-0.120429	0.566367
ENSG00000276809	0.242308	0.243208
ENSG00000276791	0.160769	0.442662
ENSG00000244076	-0.583077	0.00222033
VAMP1-AS1	-0.135385	0.518766
MIR7111	-0.0896326	0.670051
ENSG00000276667	-0.034642	0.869423
DACH1	0.185385	0.374975
RAB7B	-0.390769	0.0534326
ENSG00000276571	-0.234615	0.258955
ENSG00000276570	-0.162308	0.43825
ENSG00000271380	-0.581538	0.00229562
ENSG00000276523	0.265385	0.199798
ENSG00000276505	-0.0638462	0.76174
ENSG00000276488	0.266923	0.197106
MIR145	0.233077	0.262181
ENSG00000276345	-0.355385	0.0812674
ENSG00000276289	0.05	0.812386
ENSG00000276261	-0.101538	0.62913
ENSG00000276250	-0.0207692	0.921504
KCNE5	-0.581538	0.00229562
PIK3R6	-0.139231	0.506845
RN7SL1	0.267692	0.195769
ENSG00000276148	-0.196923	0.34543
ENSG00000276136	-0.224615	0.280388
ENSG00000276075	-0.211538	0.310063
ENSG00000276007	0.107692	0.608379
TRIR	-0.581538	0.00229562
MIR6807	-0.251972	0.224333
ENSG00000275888	0.310769	0.130529
IKBKGP1	-0.227692	0.273677
ENSG00000275854	0.0146154	0.94472
ENSG00000275769	-0.0984615	0.63961
ENSG00000275765	-0.137692	0.511597
ENSG00000275764	-0.0407692	0.846575
ENSG00000275759	0.0861538	0.682189
ENSG00000275645	-0.213077	0.306475
ENSG00000275632	-0.123846	0.55532
ENSG00000275630	-0.250962	0.226259
ENSG00000275580	-0.193846	0.35317
ENSG00000275494	-0.3	0.145113
ENSG00000275485	0.195385	0.349287
ENSG00000275484	-0.359231	0.0777978
ENSG00000275476	-0.228462	0.272015
ENSG00000275464	-0.135385	0.518766
ENSG00000275457	-0.17	0.416549
ENSG00000275413	-0.271538	0.189178
UBE2S	-0.580769	0.00233407
ENSG00000275223	0.247692	0.232568
MIR6745	0.0419311	0.842256
ENSG00000275202	-0.177692	0.395454
ENSG00000275180	0.0161538	0.938911
ENSG00000275178	-0.0407692	0.846575
ENSG00000275155	-0.116154	0.580323
LINC01679	-0.578462	0.00245275
ENSG00000275110	-0.141811	0.498923
NUDT18	-0.151538	0.469622
PDE4DIPP5	0.00735738	0.972156
ENSG00000275055	-0.205385	0.324673
TSR3	-0.577692	0.00249344
ENSG00000275025	0.04	0.849437
ENSG00000274929	0.151538	0.469622
ZKSCAN2-DT	0.28	0.175218
ENSG00000274818	-0.354615	0.0819751
H3C6	0.32	0.118898
ADAMTSL2	-0.576154	0.00257654
ENSG00000274653	0.246586	0.234729
ENSG00000274642	-0.207692	0.319146
PCCA-DT	-0.319231	0.119837
ENSG00000274578	0.11	0.600672
ENSG00000274565	-0.27	0.191796
ENSG00000274561	0.17	0.416549
ENSG00000274560	-0.0350067	0.86806
RCC1L	0.0861538	0.682189
ENSG00000274515	-0.206923	0.320982
ENSG00000274501	0.0631255	0.764354
ENSG00000274444	0.375385	0.0644409
ENSG00000274427	0.0361538	0.863775
ENSG00000274403	0.0553846	0.792591
ENSG00000274341	-0.220769	0.288922
ENSG00000274315	0.0876923	0.676811
ADRA2B	-0.148462	0.478794
HEPFAL	-0.0523077	0.803888
HSPBP1	-0.576154	0.00257654
PPIB	-0.575385	0.00261896
CASTOR2	-0.146154	0.485731
MIR6514	-0.0452538	0.829928
ENSG00000273987	-0.280769	0.173986
ENSG00000273973	0.02	0.924403
NOL12	0.363846	0.0737841
ENSG00000273893	-0.00384615	0.985442
ENSG00000226332	-0.573077	0.00274983
ENSG00000273765	-0.245385	0.23709
ENSG00000273759	0.150769	0.471907
ENSG00000273748	-0.152308	0.467344
ENSG00000273729	0.153846	0.462804
SUGT1-DT	0.391538	0.0529234
ENSG00000273716	0.103926	0.621045
ENSG00000273702	0.0730769	0.728484
ENSG00000273650	-0.115385	0.58285
RPS21-DT	-0.0146154	0.94472
ENSG00000273568	-0.00769823	0.970867
ENSG00000273493	0.0708237	0.73656
ENSG00000273487	0.330769	0.106308
ENSG00000273486	0.0369231	0.860904
ENSG00000273483	-0.133077	0.525983
ENSG00000273474	-0.0146154	0.94472
ENSG00000273473	0.0561538	0.789773
ENSG00000273456	-0.328462	0.108919
IFITM3P2	-0.573077	0.00274983
ENSG00000273437	-0.140769	0.502115
ENSG00000273424	-0.14	0.504477
ENSG00000273416	-0.183846	0.379021
ENSG00000273402	0.305385	0.137682
ENSG00000273391	-0.378462	0.0621104
ENSG00000273369	-0.334615	0.10206
ENSG00000273363	-0.0453846	0.829443
LINC02019	-0.0692308	0.742287
ENSG00000273355	0.296154	0.150593
INSYN1	-0.572308	0.00279467
PAXIP1-DT	0.318462	0.120782
ENSG00000273314	0.182308	0.383092
ENSG00000273271	-0.171538	0.412282
LINC03072	0.0961538	0.647515
CNNM3-DT	-0.0430769	0.838
TRABD-AS1	-0.231538	0.265433
ERI3	-0.572308	0.00279467
ENSG00000273226	0.0969231	0.644876
ENSG00000273188	-0.297692	0.148384
ENSG00000273186	-0.26	0.209418
ENSG00000273183	-0.0853846	0.684883
ENSG00000273179	0.111538	0.595556
SNURF	0.136923	0.513982
ENSG00000273156	0.0361538	0.863775
SERPINE1	-0.572308	0.00279467
ENSG00000273145	-0.233077	0.262181
LINC02604	0.357692	0.0791718
ENSG00000273141	-0.0253846	0.904131
SELENOO-AS1	0.0176923	0.933105
INSIG1-DT	-0.154615	0.460543
ENSG00000251062	-0.571538	0.00284013
ENSG00000273096	-0.0538462	0.798235
ENSG00000273080	-0.123077	0.557798
ENSG00000273077	0.0846154	0.687581
ENSG00000273073	-0.346154	0.0900713
ENSG00000273066	0.189231	0.364969
CDC37L1-DT	-0.131538	0.530821
ENSG00000273058	0.08	0.703848
ENSG00000273055	0.0792308	0.706571
ENSG00000240975	-0.571538	0.00284013
ENSG00000273026	-0.252308	0.223696
ENSG00000273017	-0.0553846	0.792591
RPS27P3	-0.571538	0.00284013
ENSG00000273014	0.290769	0.158511
PFKP-DT	-0.242308	0.243208
MAPK3	-0.571538	0.00284013
CITED4	-0.570769	0.00288622
CFL1	-0.570769	0.00288622
ENSG00000272977	0.210769	0.311867
ENSG00000272953	0.233846	0.260565
ENSG00000272927	-0.196923	0.34543
ENSG00000272905	0.0138462	0.947625
MIOS-DT	0.248462	0.231073
CHASERR	-0.240769	0.246306
DCP1A	0.269231	0.193114
ENSG00000272871	-0.0815385	0.698411
ENSG00000272864	0.152308	0.467344
SUV39H2-DT	0.278462	0.177701
ENSG00000272849	0.256154	0.216478
CEBPB	-0.570769	0.00288622
ENSG00000272831	-0.313846	0.126564
ENSG00000272829	0.0276923	0.895461
ENSG00000272807	0.109231	0.603236
ENSG00000272789	-0.141538	0.499758
ENSG00000272784	0.287692	0.163165
ENSG00000272777	-0.198462	0.341599
ENSG00000272768	-0.363077	0.0744419
ADIRF-AS1	0.0515385	0.806718
ENSG00000272732	0.0115385	0.956345
ENSG00000272720	0.284615	0.167914
SLC30A6-DT	-0.180769	0.387188
DUSP2	-0.568462	0.00302833
ENSG00000272707	-0.0623197	0.767281
ENSG00000272696	0.000769231	0.997088
GAS6-DT	0.0792308	0.706571
WASL-DT	0.105385	0.616127
AURKAIP1	-0.566923	0.00312634
ENSG00000272669	-0.0723077	0.731238
ENSG00000272668	0.0423077	0.840857
ENSG00000272667	-0.306154	0.136643
ARHGDIA	-0.566923	0.00312634
ENSG00000272660	-0.161462	0.440671
JTB-DT	-0.0823077	0.695698
ENSG00000272650	0.00923254	0.965064
ENSG00000272625	-0.223077	0.283783
ZNF595	0.113846	0.587918
ENSG00000272597	-0.166154	0.427325
ENSG00000272582	0.107692	0.608379
ENSG00000272576	-0.199231	0.339693
ENSG00000272529	-0.133077	0.525983
BTF3-DT	-0.231538	0.265433
ENSG00000272512	-0.239231	0.24943
ENSG00000272509	0	1
ENSG00000272506	0.0707692	0.736756
ZNF628	-0.566154	0.00317634
TSC22D4	-0.566154	0.00317634
C1orf159	-0.566154	0.00317634
FAM193B-DT	0.0515385	0.806718
MRPL20-DT	0.225385	0.278701
ENSG00000272444	0.0507692	0.809551
ENSG00000272432	-0.240769	0.246306
ENSG00000272420	-0.00307692	0.988354
ENSG00000272416	-0.0523077	0.803888
ENSG00000272411	-0.204615	0.326528
ENSG00000272402	-0.0907692	0.666102
SCAND1	-0.565385	0.00322702
CSNK1G2	-0.565385	0.00322702
ENSG00000272375	-0.0869231	0.679498
ENSG00000272369	-0.392308	0.0524179
ENSG00000272368	-0.359231	0.0777978
ENSG00000272361	0.0507692	0.809551
PODXL2	-0.565385	0.00322702
ENSG00000272343	0.245385	0.23709
ARRDC2	-0.564615	0.00327839
ENSG00000272338	-0.299231	0.146198
NICOL1	-0.563846	0.00333045
KMT2B	0.207692	0.319146
NUDT3	0.146923	0.483413
TTC23L-AS1	-0.113077	0.59046
ENSG00000272293	0.0630769	0.764531
ILRUN-AS1	-0.316923	0.122687
ENSG00000272275	0.119231	0.570263
ENSG00000272240	0.124615	0.552847
ENSG00000272223	-0.1	0.634361
POU2F1-DT	0.00923077	0.96507
ENSG00000272195	-0.253077	0.22224
ENSG00000272181	-0.363846	0.0737841
TSC22D3	-0.563846	0.00333045
KLC4-AS1	-0.223077	0.283783
ENSG00000272156	0.0692308	0.742287
RCN3	-0.562308	0.00343667
ENSG00000272148	0.101538	0.62913
HYAL2	-0.562308	0.00343667
ENSG00000272129	0.356154	0.0805642
ENSG00000272106	0.0423077	0.840857
GOLPH3-DT	-0.264615	0.201154
ENSG00000272079	0.101538	0.62913
RPL41	-0.561538	0.00349085
ENSG00000272056	-0.267692	0.195769
ENSG00000272049	-0.183846	0.379021
GTF2H5	-0.116923	0.577801
SNORD14A	0.0138462	0.947625
ATAD3A	-0.561538	0.00349085
ENSG00000272010	-0.110769	0.598112
ENSG00000272009	0.186154	0.372961
ENSG00000271993	0.228462	0.272015
ENSG00000271976	0.214615	0.302913
ENSG00000271971	0.0107692	0.959253
ENSG00000271967	0.0915385	0.663435
ENSG00000271964	-0.277692	0.178952
LINC01954	-0.26	0.209418
ENSG00000271918	0.210769	0.311867
DCTN6-DT	-0.361538	0.0757707
ENSG00000271851	-0.184615	0.376995
ENSG00000271843	0.130769	0.533247
ENSG00000271833	0.291538	0.157362
RNU6-94P	0.0823711	0.695475
ENSG00000271811	-0.294615	0.152826
ENSG00000271780	0.336923	0.0995725
ENSG00000271737	-0.186923	0.370953
ENSG00000271659	-0.0507692	0.809551
IRF2-DT	-0.128462	0.540559
PDCD6IP-DT	0.357692	0.0791718
LIX1L	-0.127692	0.543006
ENSG00000271579	0.16	0.444876
PRKACB-DT	0.122308	0.560281
ENSG00000271555	0.0246201	0.907006
ENSG00000271553	-0.0276923	0.895461
FKBP10	-0.561538	0.00349085
ENSG00000271384	-0.0207692	0.921504
PRR7	-0.561538	0.00349085
ENSG00000271344	0.0869231	0.679498
CCNY-AS1	0.154615	0.460543
RPL31P14	-0.560769	0.00354576
JUND	-0.56	0.00360139
ENSG00000271228	0.113077	0.59046
MTCO1P22	0.35	0.0863199
PATJ-DT	0.0261538	0.90124
MT-TE	-0.559231	0.00365776
COX5AP1	-0.0746154	0.722986
ENSG00000271155	0.262308	0.205258
ITGB8-AS1	-0.286923	0.164343
NDUFA4L2	-0.558462	0.00371488
LINC03049	0.0476923	0.820905
TMEM242-DT	-0.028467	0.892553
ENSG00000271032	-0.0376923	0.858035
ENSG00000271018	0.238534	0.250853
ENSG00000270983	0.214615	0.302913
MAP2K5-DT	0.131538	0.530821
TSSC4	-0.558462	0.00371488
HSPE1P7	0.0623077	0.767325
MTND4P35	0.0361538	0.863775
RASL10B	-0.0438462	0.835146
ENSG00000273107	-0.557692	0.00377275
CDC42EP1	-0.557692	0.00377275
ENSG00000270733	0.178496	0.393286
MICOS10P2	-0.325385	0.112474
ENSG00000270702	-0.205385	0.324673
ENSG00000270694	-0.0615385	0.770121
NCLN	-0.556923	0.00383139
ENSG00000270659	0.135385	0.518766
LEISA1	-0.241538	0.244754
ENSG00000270598	-0.207692	0.319146
FAM136DP	0.17398	0.405558
ENSG00000270558	-0.179231	0.391308
ENSG00000270522	-0.0315993	0.880808
ENSG00000270504	-0.116923	0.577801
LAMB2P1	-0.0553846	0.792591
CAHM	0.0353846	0.866648
ENSG00000270412	0.0438462	0.835146
HMGN3-AS1	0.294615	0.152826
MTATP6P2	0.2	0.337793
NDUFB8P2	0.205385	0.324673
ENSG00000270248	0.0115385	0.956345
MTND6P22	-0.210769	0.311867
TMEM54	-0.556923	0.00383139
SLC25A1	-0.556154	0.00389079
ENSG00000270179	0.173077	0.408038
ENSG00000270175	0.105385	0.616127
NCBP2AS2	-0.349231	0.0870606
ENSG00000270147	0.253077	0.22224
ST8SIA5-DT	0.17	0.416549
ENSG00000270108	0.207692	0.319146
ENSG00000270091	-0.367692	0.0705617
GAS5-AS1	0.319231	0.119837
MILIP	-0.554615	0.00401194
ENSG00000270062	0.394615	0.0509242
ENSG00000272468	-0.553846	0.0040737
ENSG00000270059	0.0215385	0.918606
ATP6V0D1-DT	0.108462	0.605805
ENSG00000270039	-0.250769	0.226628
ENSG00000270021	0.114615	0.585382
ENSG00000270012	0.370769	0.0680622
GNAI2	-0.553846	0.0040737
ENSG00000269986	-0.180769	0.387188
ENSG00000269978	0.112742	0.591567
ENSG00000269976	-0.122308	0.560281
ENSG00000269973	-0.329231	0.108044
ENSG00000269958	0.0246154	0.907024
ENSG00000269952	0.13	0.535679
ENSG00000269947	-0.287692	0.163165
LINC02104	-0.553077	0.00413626
MIRLET7A1HG	-0.0423077	0.840857
ENSG00000269903	0.0246154	0.907024
ENSG00000213867	-0.553077	0.00413626
ENSG00000269892	-0.153077	0.465071
ENSG00000269888	-0.35	0.0863199
ENSG00000269887	0.0276923	0.895461
ENSG00000269886	-0.0507692	0.809551
ENSG00000269867	0.250769	0.226628
EGLN2	0.323077	0.115195
ZNF528-AS1	0.197692	0.343511
ENSG00000269765	0.391538	0.0529234
ZNF470-DT	0.0415385	0.843715
ERCC1	-0.553077	0.00413626
RNU4-62P	-0.55291	0.00414993
ENSG00000269481	0.121538	0.562769
ENSG00000269463	-0.146154	0.485731
PGLS-DT	0.299231	0.146198
RAB11B-AS1	-0.11	0.600672
PPP1R14B	-0.552308	0.00419964
PTOV1-AS2	0.291538	0.157362
ZNF587B	0.124615	0.552847
IKBKG	-0.0184615	0.930203
FKBP1AP1	0.325832	0.111952
ZSCAN16-AS1	-0.310769	0.130529
RPS27AP19	-0.228462	0.272015
ENSG00000269194	0.0969231	0.644876
ENSG00000269191	0.0661538	0.753385
TPT1P6	-0.551538	0.00426383
ENSG00000269124	0.130769	0.533247
HNRNPA1P52	-0.00615385	0.97671
ZNF497-AS1	0.236154	0.255754
ENSG00000269044	-0.263077	0.203883
MAN1B1-DT	-0.304615	0.138727
ENSG00000268947	0.345385	0.090836
CKS1BP3	-0.119638	0.568936
ENSG00000268938	-0.185385	0.374975
ENSG00000268912	0.388462	0.0549832
ENSG00000268896	-0.0230769	0.912813
ENSG00000268858	0.300769	0.144034
ENSG00000268836	-0.233077	0.262181
SCGB1B2P	-0.222308	0.285489
ENSG00000268707	0.35	0.0863199
ENSG00000268649	0.03	0.886802
ILVBL-AS1	0.202308	0.332131
ENSG00000268555	0.186923	0.370953
ZNF8-DT	0.0807692	0.701128
MIR4453HG	0.134615	0.521167
TRMT112P6	-0.237692	0.252579
ENSG00000268403	0.131538	0.530821
ARPC1AP2	0.297692	0.148384
FKBP4P6	0.257692	0.213635
EEF1A1P7	0.145385	0.488055
ENSG00000268205	-0.0738462	0.725733
ENSG00000268201	-0.184615	0.376995
ENSG00000268189	-0.146154	0.485731
SRP14P4	0.0461627	0.826562
NAPA-AS1	-0.246154	0.235576
CARD8-AS1	0.346923	0.0893114
ENSG00000267980	-0.00615385	0.97671
CYBA	-0.551538	0.00426383
HSPB6	-0.550769	0.00432885
ZNF460-AS1	-0.153846	0.462804
FPGS	-0.55	0.0043947
ENSG00000267834	0.0930769	0.658112
ENSG00000267811	-0.393846	0.0514183
NDUFV2P1	-0.186923	0.370953
TMEM160	-0.55	0.0043947
LIN37	-0.0453846	0.829443
ENSG00000267784	0.283846	0.169117
ENSG00000267769	-0.0215385	0.918606
LINC02593	-0.549231	0.0044614
ZNF224	0.266154	0.198449
TAGLN	-0.549231	0.0044614
ENSG00000267653	-0.121538	0.562769
ENSG00000267547	-0.140769	0.502115
HIKESHIP2	0.0415385	0.843715
ENSG00000267543	-0.0330769	0.875276
MTCO2P2	-0.281538	0.17276
S1PR2	-0.208462	0.317317
ENSG00000267533	0.0815385	0.698411
ENSG00000267523	0.176923	0.397536
TMEM204	-0.548462	0.00452895
ENSG00000267505	0.0176923	0.933105
ENSG00000267481	0.12	0.56776
LINC02979	0.333846	0.1029
NUDT19-DT	-0.243846	0.240136
ZNF571-AS1	0.127692	0.543006
ENSG00000267466	0.154615	0.460543
ZNF582-DT	0.0761538	0.7175
ENSG00000267449	-0.0107713	0.959245
PML	-0.546923	0.00466665
ZFP28-DT	-0.309231	0.132545
SETBP1-DT	-0.366923	0.0711974
DM1-AS	-0.0461538	0.826595
DDA1	-0.546923	0.00466665
KCNJ2-AS1	-0.00230769	0.991265
ENSG00000267342	-0.0223077	0.915709
ENSG00000267340	0.154615	0.460543
LINC00906	0.324615	0.113376
SNHG30	-0.259231	0.210818
ENSG00000267317	-0.0376923	0.858035
TBX2-AS1	-0.108462	0.605805
ENSG00000267279	-0.349231	0.0870606
PPIAP58	-0.118462	0.572771
ZNF790-AS1	-0.112308	0.593006
ENSG00000267249	-0.271538	0.189178
ENSG00000267244	0.105385	0.616127
C17orf113	0.302308	0.141894
ENSG00000267218	-0.0923077	0.660771
PTP4A2P1	0.194615	0.351225
ENSG00000267184	-0.194615	0.351225
ENSG00000267127	-0.142308	0.497406
FMNL1-DT	0.201538	0.334012
RPL10P15	-0.224615	0.280388
ENSG00000267114	0.286154	0.165528
PCAT19	0.190769	0.361011
ILF3-DT	0.145385	0.488055
ENSG00000267092	0.0876923	0.676811
DOCK6-AS1	-0.116154	0.580323
ASB16-AS1	0.0392308	0.852301
ENSG00000267069	-0.124615	0.552847
PTGES3L	-0.320769	0.117964
ENSG00000267002	0.378462	0.0621104
FXYD1	-0.395385	0.0504337
HSD17B1-AS1	-0.0615385	0.770121
ZNF793-AS1	-0.106923	0.610957
ENSG00000266910	-0.226923	0.275345
GARIN5A	-0.546154	0.00473681
CEACAM16-AS1	-0.107692	0.608379
ENSG00000266891	-0.0941916	0.654265
ENSG00000266876	0.333846	0.1029
MYO15B	0.0253846	0.904131
PARL	-0.544615	0.00487981
ENSG00000266601	0.355838	0.0808527
EIF1P5	-0.172308	0.410157
ATP6V1E1P2	0.146923	0.483413
ATG12P1	-0.309231	0.132545
MIR4641	-0.167341	0.423983
ENSG00000266490	0.0684615	0.745057
ENSG00000266479	0.38147	0.0598952
MRPS21	-0.3	0.145113
CCDC85B	-0.543846	0.00495266
NPY1R	-0.543846	0.00495266
LIVAR	0.211538	0.310063
C19orf53	-0.543846	0.00495266
SLC7A5	-0.543846	0.00495266
LINC01909	0.0415385	0.843715
MIR3176	0.0606568	0.77333
ENSG00000266184	0.0407692	0.846575
ENSG00000266179	0.0286551	0.891847
POLRMTP1	0.142308	0.497406
NDUFV2-AS1	-0.0930769	0.658112
SRGAP2	0.105385	0.616127
GATA6-AS1	0.154615	0.460543
MIR3671	0.254615	0.219347
ENSG00000265982	-0.190769	0.361011
TXNIP	0.140769	0.502115
ENSG00000265936	-0.136154	0.516371
MIR3685	0.311778	0.129219
MIR4489	0.102229	0.626788
AP2S1	-0.543846	0.00495266
CX3CL1	-0.543846	0.00495266
ZNF516-AS1	0.211538	0.310063
WDR54	-0.543846	0.00495266
MRPL14	-0.543077	0.00502643
ATP5PF	-0.543077	0.00502643
TUFMP1	-0.107692	0.608379
WDR45BP1	0.171538	0.412282
ENSG00000265519	0.343846	0.0923801
ENSG00000265511	-0.182308	0.383092
LOXL1	-0.543077	0.00502643
MIR4768	-0.138524	0.509027
MIR3682	-0.259281	0.210727
CAPS	-0.541538	0.00517675
TIMM23	-0.211538	0.310063
ENSG00000265298	0.112308	0.593006
MIR3132	0.335643	0.100947
RBM8A	-0.00230769	0.991265
MIR142HG	-0.102308	0.626521
MIR4728	-0.0871892	0.678568
MIR133A1HG	0.0984615	0.63961
GJA5	-0.0446154	0.832293
C1QTNF1-AS1	-0.236923	0.254163
SP2-DT	-0.340769	0.0955271
ENSG00000264577	0.253077	0.22224
LINC00526	0.269231	0.193114
RELB	-0.541538	0.00517675
DYNLL2	0.388462	0.0549832
SNRPGP2	-0.148462	0.478794
MIX23P1	-0.0523077	0.803888
CLIC3	-0.540769	0.00525331
ZNF236-DT	-0.375385	0.0644409
ZNF407-AS1	0.153846	0.462804
MYL12-AS1	-0.142308	0.497406
MIR4701	0.0192959	0.927057
ENSG00000264179	0.179231	0.391308
B4GALT2	-0.540769	0.00525331
ENSG00000263970	-0.0907692	0.666102
NBPF11	0.0353846	0.866648
LASP1NB	-0.210769	0.311867
ENSG00000263781	-0.226154	0.27702
LINC00667	0.190769	0.361011
DBN1	-0.540769	0.00525331
MTATP6P3	-0.109231	0.603236
SRSF8	0.00384615	0.985442
ENSG00000263443	0.13618	0.51629
RN7SL689P	0.222308	0.285489
SGSM2-AS1	0.367692	0.0705617
ENSG00000263272	0.241538	0.244754
RPS7P1	-0.179231	0.391308
ENSG00000263235	-0.0984615	0.63961
ZNRD2	-0.539231	0.0054093
MYZAP	0.14	0.504477
PPP1R14A	-0.539231	0.0054093
ZNF213-AS1	-0.0123077	0.953438
ENSG00000263017	-0.187692	0.368952
AKAP1-DT	-0.00307692	0.988354
SRM	-0.539231	0.0054093
ENSG00000242660	-0.538462	0.00548875
CTNS-AS1	-0.0838462	0.690283
MTCO1P40	-0.296923	0.149486
HSPB1P1	-0.538462	0.00548875
ENSG00000262692	0.122544	0.559519
SPON1	-0.116154	0.580323
MIR193BHG	0.145385	0.488055
ENSG00000262410	0.239231	0.24943
MCUR1P1	-0.310769	0.130529
ENSG00000262370	0.326923	0.110686
HNRNPA1P16	0.306923	0.13561
MYMX	-0.301538	0.142961
C17orf114	-0.363846	0.0737841
ENSG00000262115	-0.00230769	0.991265
ENSG00000262050	0.356923	0.0798657
MMP25-AS1	0.226154	0.27702
ENSG00000261840	-0.246154	0.235576
LOXL1-AS1	-0.32	0.118898
ENSG00000261799	0.376923	0.0632674
ENSG00000261783	-0.158462	0.449323
HPR	-0.09	0.668774
ENSG00000261671	-0.142308	0.497406
ECI1-AS1	0.133846	0.523572
PIERCE2	0.0369231	0.860904
YBX3P1	0.378462	0.0621104
SUB1P3	-0.198462	0.341599
MT-CO2	-0.537692	0.00556918
ENSG00000261600	0.222735	0.28454
ENSG00000261588	-0.294682	0.152728
ENSG00000261572	0.142308	0.497406
EEF1A1P38	-0.216923	0.297618
ENSG00000261549	0.216923	0.297618
ENSG00000261526	-0.304615	0.138727
PAN3-AS1	0.304615	0.138727
ENSG00000261474	-0.394615	0.0509242
RAB1B	-0.537692	0.00556918
LINC01003	-0.0923077	0.660771
ATP5PBP7	0.317692	0.121732
VPS9D1-AS1	0.226154	0.27702
PECAM1	0.0584615	0.781335
CDC42EP4	-0.536923	0.00565059
ENSG00000261338	-0.0561538	0.789773
BOP1	0.0107692	0.959253
VEGFB	-0.536923	0.00565059
ST3GAL1-DT	0.165385	0.429498
ENSG00000261195	-0.0876923	0.676811
DSP-AS1	0.151538	0.469622
TFIP11-DT	0.246923	0.234069
ENSG00000261187	0.182308	0.383092
ENSG00000261168	0.112308	0.593006
ENSG00000261094	0.198462	0.341599
ZNNT1	0.382308	0.0592894
DOCK9-DT	-0.368462	0.0699303
CSTPP1	-0.536923	0.00565059
LINC01311	-0.142308	0.497406
RPL12P35	-0.536154	0.005733
ENSG00000234044	-0.536154	0.005733
ENSG00000260912	-0.0707692	0.736756
ENSG00000260911	-0.115385	0.58285
TEDC1	-0.536154	0.005733
ENSG00000260805	-0.0423077	0.840857
LINC01963	0.346923	0.0893114
ATXN7L3-AS1	-0.141538	0.499758
MIR3677HG	-0.0615385	0.770121
HAPLN3	-0.536154	0.005733
TBC1D22A-DT	0.0592308	0.778527
CYCSP39	0.212308	0.308266
ENSG00000260685	0.0576923	0.784145
SNAI3-AS1	0.00769231	0.970889
RUSF1-DT	0.142308	0.497406
RPL23AP97	-0.223846	0.282082
ENSG00000260604	0.146923	0.483413
ENSG00000260583	-0.295385	0.151707
PPM1L-DT	0.122308	0.560281
ENSG00000260563	0.123077	0.557798
CISTR	0.0515385	0.806718
MYL12BP1	-0.0392308	0.852301
ENSG00000260484	0.216923	0.297618
LCMT1-AS1	-0.0361538	0.863775
SCX	-0.342308	0.0939437
ENSG00000260400	0.273077	0.186585
ENSG00000260398	0.249231	0.229585
PGP	-0.535385	0.00581642
PHB1P21	0.05	0.812386
COX6CP1	-0.0669231	0.750606
LINC02986	-0.0592308	0.778527
MRC1	-0.144615	0.490385
ENSG00000260296	-0.00461538	0.982531
ZNF426-DT	-0.533846	0.00598633
CHPF	-0.533846	0.00598633
ENSG00000260279	0.25	0.228103
ENSG00000260267	0.323077	0.115195
SNHG19	-0.386154	0.0565685
BGN	-0.533077	0.00607283
APOOP5	-0.244615	0.23861
ZNRD2-DT	0.357692	0.0791718
KDM7A-DT	0.19	0.362987
ENSG00000260196	-0.00923077	0.96507
LINC02846	-0.14	0.504477
LINC02137	-0.00153846	0.994177
ENSG00000260160	-0.100769	0.631744
AEBP1	-0.533077	0.00607283
MIR762HG	-0.135385	0.518766
ENSG00000260077	0.316154	0.123648
ENSG00000260051	0.387692	0.0555078
ENSG00000260038	-0.318462	0.120782
MYL6B	-0.532308	0.00616038
RPL10P14	-0.09	0.668774
C19orf47	-0.532308	0.00616038
ENSG00000260011	0.204615	0.326528
TGFBR3L	-0.202308	0.332131
ENSG00000260000	0.189231	0.364969
CHRNE	-0.532308	0.00616038
ENSG00000259969	-0.0576923	0.784145
RBM15B	0.374615	0.065034
SELENOM	-0.531538	0.00624898
IRF2BP1	-0.531538	0.00624898
HNRNPLP2	0.390769	0.0534326
ENSG00000259891	0.0746154	0.722986
NR4A1AS	-0.39	0.0539456
EHD4-AS1	-0.26	0.209418
ZNF414	-0.531538	0.00624898
ENSG00000259865	0.191538	0.359041
ELOCP2	-0.114615	0.585382
HMGB1P6	0.206154	0.322824
OST4	-0.530769	0.00633866
ENSG00000259727	-0.0492308	0.815223
ENSG00000259711	-0.100769	0.631744
NUTF2P6	-0.123077	0.557798
HSP90B2P	0.0476923	0.820905
EEF1A1P22	-0.17	0.416549
ENSG00000259605	-0.130769	0.533247
PRELID1P4	-0.202308	0.332131
KRT8P23	0.390769	0.0534326
ENSG00000259556	-0.234615	0.258955
SLC28A2-AS1	-0.143846	0.49272
MRPL46	0.228462	0.272015
ADNP-AS1	0.323077	0.115195
THTPA	0.216923	0.297618
CTXND1	-0.0930769	0.658112
HNRNPA1P45	0.190769	0.361011
ENSG00000259370	0.247692	0.232568
ENSG00000259369	-0.323846	0.114283
C8orf82	-0.530769	0.00633866
INAFM2	-0.06	0.775723
SDCBP2	-0.530769	0.00633866
ZNF710-AS1	0.215385	0.301142
ATOX1	-0.53	0.00642941
ITGB3	0.207692	0.319146
ENSG00000259173	-0.115385	0.58285
TXN	-0.53	0.00642941
ENSG00000259088	-0.207692	0.319146
KIAA1143P1	-0.109252	0.603166
RARRES2	-0.53	0.00642941
MIDEAS-AS1	0.0361538	0.863775
HNRNPUP1	-0.131538	0.530821
TBCB	-0.53	0.00642941
SHARPIN	-0.529231	0.00652124
FPGT-TNNI3K	0.130769	0.533247
NCF4	-0.529231	0.00652124
ENSG00000259020	-0.0184615	0.930203
COX5AP2	-0.0753846	0.720241
ENSG00000258965	-0.202308	0.332131
FTH1P13	-0.289231	0.160826
ENSG00000258949	0.245385	0.23709
FOXN3-AS1	-0.142308	0.497406
CEP95	0.282308	0.171539
ENSG00000258824	0.356923	0.0798657
RAP1AP	0.166154	0.427325
ENSG00000258734	0.136154	0.516371
SLC25A21-AS1	-0.0538462	0.798235
ENSG00000258676	-0.120769	0.565262
LINC02308	-0.127692	0.543006
ENSG00000258674	0.124615	0.552847
ARHGAP5-AS1	-0.166154	0.427325
HSPE1P2	-0.0769231	0.714763
RPL21P5	-0.133077	0.525983
ENSG00000258634	0.306154	0.136643
DNAJC19P9	0.0446154	0.832293
ENSG00000258604	0.0492308	0.815223
LINC01629	0.0348508	0.868643
ENSG00000258581	-0.189231	0.364969
ENSG00000251211	-0.528462	0.00661418
ENSG00000258509	-0.214781	0.302532
RPL37P23	-0.528462	0.00661418
SPESP1	-0.227692	0.273677
CHMP4BP1	-0.132308	0.528399
ENSG00000258444	-0.376611	0.0635042
LINC00641	0.312308	0.128535
PDF	0.0369231	0.860904
RMB8AP1	-0.03	0.886802
ATP5MC2P2	-0.121538	0.562769
ENSG00000258365	-0.2	0.337793
ENSG00000258311	0.254615	0.219347
CHURC1	0.285385	0.166718
ENSG00000214846	-0.528462	0.00661418
PEMT	-0.528462	0.00661418
HSPE1P4	-0.133077	0.525983
CHCHD5	-0.527692	0.00670822
ENSG00000258091	0.0230769	0.912813
ENSG00000258090	0.148462	0.478794
CD63-AS1	0.339231	0.0971302
S100A16	-0.526923	0.00680337
NOP56P3	-0.00271061	0.98974
CUX1	0.318462	0.120782
PHB1P18	-0.135385	0.518766
NPPA	-0.526923	0.00680337
CNPY2	-0.226923	0.275345
EBP	-0.526923	0.00680337
LBX2-AS1	-0.263846	0.202515
GIHCG	-0.113077	0.59046
PSMA3-AS1	0.133077	0.525983
ENSG00000257543	0.283077	0.170325
ENSG00000257511	-0.169231	0.418692
ENSG00000257464	0.125409	0.550302
EXO5-DT	-0.525789	0.0069457
FNTB	-0.139231	0.506845
TNS2-AS1	-0.172308	0.410157
ENSG00000257270	0.150769	0.471907
SLC38A4-AS1	-0.38	0.0609699
PARK7P1	0.375385	0.0644409
GATC	-0.0146154	0.94472
C1QC	-0.525385	0.00699709
NHLRC4	-0.0230769	0.912813
SRSF3P1	0.0723077	0.731238
ENSG00000257027	0.384615	0.057645
SNRPEP2	-0.394615	0.0509242
ENSG00000256843	0.298691	0.146961
C17orf100	0.176923	0.397536
HSPE1	-0.524615	0.00709566
TIMM17BP1	-0.340769	0.0955271
TFEB	-0.524615	0.00709566
ARPC3P3	-0.16	0.444876
YIF1B	-0.523846	0.00719539
ENSG00000256673	0.345385	0.090836
LINC02455	0.118462	0.572771
ZBTB11-AS1	0.0846154	0.687581
MYC	-0.523077	0.00729629
ENSG00000256443	-0.0169231	0.936008
RPL41P5	-0.365638	0.0722689
PCOLCE	-0.523077	0.00729629
RBX1	-0.523077	0.00729629
HMBS	-0.373077	0.0662326
SMIM3	-0.292308	0.156219
ENSG00000267655	-0.522308	0.00739838
ZNF10	0.299231	0.146198
IFITM2	-0.522308	0.00739838
ENSG00000256148	0.387692	0.0555078
ATP5MFP5	-0.216923	0.297618
SLC16A11	-0.522308	0.00739838
ZNF432	0.0723077	0.731238
ENTPD2	-0.522308	0.00739838
ZFPM1	-0.521538	0.00750165
COA8	-0.116154	0.580323
PSMC1P9	-0.00307692	0.988354
PUS1-AS1	0.181538	0.385137
CAVIN3	-0.521538	0.00750165
PDCD5P1	-0.374615	0.065034
FUNDC2P1	0.157692	0.451555
PABPN1P2	-0.0638462	0.76174
LINC01479	0.124615	0.552847
SNHG1	0.355385	0.0812674
TRIL	0.183077	0.381053
ENSG00000255580	0.0846154	0.687581
BRWD1-AS2	-0.234615	0.258955
RPA2P3	0.227736	0.273582
POLR2M	0.272308	0.187878
GAU1	0.186154	0.372961
PRSS23-AS1	-0.126154	0.547917
TBX5-AS1	0.365385	0.072482
ENSG00000255389	0.168462	0.420842
LINC02761	0.252308	0.223696
CSRP3-AS1	0.0384615	0.855167
SDF2L1	-0.520769	0.00760613
GATD1-DT	0.212308	0.308266
ELOBP2	-0.192308	0.357077
MIR100HG	0.280769	0.173986
ENSG00000255237	-0.08	0.703848
CLTB	-0.52	0.00771182
ENSG00000255142	0.323908	0.114209
EMSY-DT	-0.352308	0.0841264
TMT1B	-0.52	0.00771182
MORF4L1P3	0.370769	0.0680622
SDHCP4	0.0123077	0.953438
BRK1	-0.181538	0.385137
DPP3	-0.0830769	0.692989
BORCS8	-0.133846	0.523572
RAP1BL	0.361538	0.0757707
TAF10	-0.52	0.00771182
KLC2-AS1	0.126154	0.547917
ENSG00000254851	0.0553846	0.792591
CD63	-0.52	0.00771182
LIPT2-AS1	-0.0184615	0.930203
SNRPCP14	0.0796307	0.705155
ENSG00000254780	-0.292308	0.156219
NAP1L1P1	0.119231	0.570263
ENSG00000254719	0.199231	0.339693
SENCR	-0.153077	0.465071
CAPG	-0.52	0.00771182
DHCR7-DT	0.0423077	0.840857
DNAJC30	-0.519231	0.00781873
CAPN1-AS1	0.286154	0.165528
SNRPC	-0.518462	0.00792688
ENSG00000276529	-0.517692	0.00803627
APOE	-0.517692	0.00803627
FLJ20021	-0.292308	0.156219
FXYD6-AS1	0.246154	0.235576
FNTAP1	0.330769	0.106308
PTP4A2P2	-0.0723077	0.731238
UBQLN1-AS1	0.313077	0.127547
AP5B1	0.17	0.416549
ENSG00000254461	0.240769	0.246306
NAV2-AS2	-0.253846	0.22079
MYL12AP1	0.0592308	0.778527
ENSG00000254373	-0.28	0.175218
ENSG00000254343	-0.13	0.535679
KRT8P3	-0.379231	0.0615381
ERHP1	0.121538	0.562769
MTND6P3	0.0530769	0.80106
RBPMS-AS1	-0.278462	0.177701
LYN	0.23	0.268711
MAP2K1P1	0.343846	0.0923801
ZNF260	0.322308	0.116113
ENSG00000254002	0.150769	0.471907
ENSG00000253991	-0.0123077	0.953438
HMGN1P38	-0.0823077	0.695698
VPS13B-DT	-0.247692	0.232568
ENSG00000253886	0.257692	0.213635
ENSG00000253842	0.263077	0.203883
DSTNP3	-0.0769231	0.714763
LINC01170	-0.373077	0.0662326
ENSG00000253785	0.0707692	0.736756
OTUD6B-AS1	0.370769	0.0680622
ERF	-0.517692	0.00803627
ENSG00000253730	-0.215385	0.301142
JOSD2	-0.516923	0.00814693
CHCHD6	-0.516923	0.00814693
MINCR	-0.0869231	0.679498
ENSG00000253683	-0.276154	0.181472
UBE2HP1	0.32	0.118898
TAGLN2P1	-0.186923	0.370953
EIF5AL1	-0.194615	0.351225
RPSAP74	0.0123077	0.953438
ZNF428	-0.516923	0.00814693
RNF5P1	-0.268462	0.194438
NACA2	-0.0323077	0.878155
CTNNA1-AS1	-0.232726	0.262922
ENSG00000253389	0.175385	0.401718
ENSG00000253369	0.119231	0.570263
TRNP1	-0.319231	0.119837
STOML1	-0.516923	0.00814693
TMSB10	-0.516923	0.00814693
PCBP2P2	0.300769	0.144034
MAILR	0.228462	0.272015
FAM24B	-0.515385	0.00837204
KRT8	-0.515385	0.00837204
CCDC71L	-0.322308	0.116113
SHLD3	0.361538	0.0757707
C8orf88	0.308462	0.133561
DENND3-AS1	-0.0576923	0.784145
ENSG00000253177	0.377692	0.0626869
H2AZP2	-0.201538	0.334012
Y_RNA	0.0492402	0.815188
RNU6-1136P	-0.344111	0.0921129
RNY3P16	0.0763071	0.716955
RNU6-415P	-0.333018	0.103809
RNU4ATAC18P	0.126923	0.545459
RNU6-760P	0.176923	0.397536
ENSG00000251867	0.00769231	0.970889
RPL18A	-0.515385	0.00837204
ENSG00000251615	-0.0807692	0.701128
TGFB1	-0.515385	0.00837204
RPL23AP2	-0.514615	0.00848653
DPCD	-0.514615	0.00848653
RAMP1	-0.514615	0.00848653
LINC02482	-0.386154	0.0565685
ARPC1AP4	0.333846	0.1029
ALDH7A1P1	0.318462	0.120782
NRSN2	-0.514615	0.00848653
WWC2-AS2	0.236154	0.255754
MBTPS1-DT	-0.513846	0.00860232
ENSG00000251286	0.138462	0.509219
SMIM15-AS1	0.313077	0.127547
GTF2F2P1	0.392308	0.0524179
SNRPCP2	-0.228462	0.272015
FHIT	-0.513846	0.00860232
ENSG00000251188	-0.312308	0.128535
MRPS30-DT	-0.156923	0.453794
MVB12A	-0.513846	0.00860232
SSBP4	-0.513846	0.00860232
RBX1P2	0.0376923	0.858035
THAP9-AS1	0.265385	0.199798
ENSG00000251017	0.315385	0.124615
SLC25A30-AS1	-0.323846	0.114283
GGCTP1	0.29	0.159666
NDUFB11	-0.513077	0.00871943
MARCHF11-AS1	0.353846	0.0826875
ENSG00000250956	-0.0909852	0.665353
MT1X	-0.511538	0.00895762
METTL21EP	0.0330769	0.875276
MGMT	-0.511538	0.00895762
SNHG18	-0.241538	0.244754
ENSG00000250764	0.16	0.444876
SELENOP	0.118462	0.572771
LINC02269	0.0484615	0.818063
SNRPCP8	-0.285055	0.16723
GLI4	-0.254615	0.219347
ENSG00000250568	0.0484615	0.818063
CERCAM	-0.511538	0.00895762
ABHD17AP3	-0.214615	0.302913
GPR162	-0.0738462	0.725733
ENSG00000250497	0.09	0.668774
WBP1LP2	0.256154	0.216478
GMPSP1	-0.329231	0.108044
RARA	-0.511538	0.00895762
EIF3KP3	-0.312308	0.128535
ENSG00000250441	0.133846	0.523572
NECTIN2	-0.511538	0.00895762
LINC02502	-0.101538	0.62913
RPSAP70	-0.110769	0.598112
ENSG00000250321	-0.117692	0.575283
RPL13AP26	-0.236923	0.254163
SMIM20	-0.0315385	0.881036
LINC02762	-0.158462	0.449323
TRIM7-AS2	-0.386154	0.0565685
EEF1A1P13	-0.0592308	0.778527
GIPC1	-0.511538	0.00895762
PKD2L2-DT	0.176154	0.399624
ENSG00000250132	0.33	0.107174
TAMALIN	-0.510769	0.00907874
YJEFN3	0.210769	0.311867
KCNE4	-0.510769	0.00907874
SLC41A3-AS1	0.198462	0.341599
GJD2-DT	-0.103077	0.623916
TMEM158	-0.0515385	0.806718
ENSG00000227077	-0.51	0.00920121
NAALADL1	-0.51	0.00920121
ENSG00000249930	0.0961723	0.647451
EEF1A1P19	-0.178462	0.393378
THBS4-AS1	-0.207692	0.319146
SNRPCP13	-0.0323077	0.878155
ENSG00000249780	0.193846	0.35317
ENSG00000249774	0.0723077	0.731238
NOP14-AS1	0.210769	0.311867
CARMN	0.306923	0.13561
ANKHD1-DT	-0.05	0.812386
ENSG00000249617	-0.370769	0.0680622
PCGF3-AS1	0.248462	0.231073
TARS1-DT	0.216923	0.297618
NINJ1	-0.51	0.00920121
GAPDHP70	-0.126154	0.547917
ECSIT	-0.51	0.00920121
ZNF324B	0.309231	0.132545
NAA60	-0.51	0.00920121
EEF1A1P9	0.223077	0.283783
ACTB	-0.51	0.00920121
TICAM2-AS1	-0.232308	0.263804
TMEM150C	0.270769	0.190484
ATP5MGL	-0.163846	0.433862
GAPDHP38	0.0576923	0.784145
LINC02517	0.0138462	0.947625
MTND6P4	-0.139231	0.506845
IRX4-AS1	-0.22	0.290649
HAUS5	-0.317692	0.121732
ENSG00000249072	0.00923077	0.96507
SUMO2P6	-0.0184615	0.930203
ENSG00000260257	-0.509231	0.00932505
PSME2P3	0.104615	0.618719
HRCT1	-0.509231	0.00932505
HHIP-AS1	-0.255385	0.217909
USP46-DT	0.214615	0.302913
ENSG00000248794	-0.206923	0.320982
MTLN	-0.509231	0.00932505
CCDC153	-0.223846	0.282082
ADGRL3-AS1	0.03	0.886802
OXCT1-AS1	-0.0838462	0.690283
ENSG00000248648	-0.176923	0.397536
OXER1	-0.509231	0.00932505
ARL8A	-0.509231	0.00932505
FLJ42969	0.270769	0.190484
NPM1P21	0.340769	0.0955271
ENSG00000248569	0.108462	0.605805
ANP32CP	0.119231	0.570263
MTATP6P1	0.156923	0.453794
EFNB1	-0.509231	0.00932505
SRP14-DT	0.239231	0.24943
CHD1-DT	0.182308	0.383092
ABHD14A	-0.379231	0.0615381
GASK1B-AS1	0.124615	0.552847
GAPDHP61	0.127692	0.543006
ENSG00000248367	0.0392308	0.852301
CDK11B	0.228462	0.272015
TRIM52-AS1	-0.0846154	0.687581
WDR45P1	0.286154	0.165528
GAPDHP60	-0.386154	0.0565685
ADH1C	-0.0238462	0.909918
RPS5P8	-0.508462	0.00945028
CRABP2	-0.508462	0.00945028
LINC00926	-0.375385	0.0644409
SNRPF	-0.508462	0.00945028
TMEM161B-DT	0.12	0.56776
MOCS2-DT	0.353846	0.0826875
USP51	0.271538	0.189178
MTND4P12	-0.00769231	0.970889
RPL37AP8	-0.507692	0.0095769
TWF2	-0.283846	0.169117
MISFA	-0.359231	0.0777978
TCAP	-0.507692	0.0095769
MIR4458HG	-0.374615	0.065034
ENSG00000218682	-0.506923	0.00970493
ZCCHC3	0.326923	0.110686
FIBP	-0.506923	0.00970493
ENSG00000247134	0.000769231	0.997088
SNHG10	-0.0715385	0.733995
PGAM5	0.293077	0.155083
SOCS2-AS1	0.0723077	0.731238
ATOH8	-0.506923	0.00970493
CCDC107	-0.506923	0.00970493
RILPL2	-0.506923	0.00970493
RASSF8-AS1	0.363077	0.0744419
PICART1	-0.319231	0.119837
UBE2D3-AS1	-0.0915385	0.663435
SLCO5A1-AS1	-0.122308	0.560281
GUK1	-0.506923	0.00970493
ENSG00000246465	0.269231	0.193114
PGLS	-0.506923	0.00970493
PPM1K-DT	-0.135385	0.518766
SBF2-AS1	0.0723077	0.731238
SUPT4H1P2	-0.0215385	0.918606
RAB30-DT	-0.0792308	0.706571
ALDH1L1-AS2	0.314615	0.125587
SLC12A2-DT	0.0323077	0.878155
FCGRT	-0.506923	0.00970493
RAD51-AS1	0.246154	0.235576
CRNDE	-0.211538	0.310063
SPI1	-0.506923	0.00970493
SCAMP1-AS1	0.126923	0.545459
NEAT1	0.276154	0.181472
ASAH1-AS1	0.0353846	0.866648
PDLIM7	-0.506154	0.00983438
OTUB1	-0.505385	0.00996526
LINC00847	0.140769	0.502115
LINC02453	0.0584615	0.781335
MTCYBP18	0.125385	0.55038
GABPB1-AS1	0.11	0.600672
SIL1	-0.505385	0.00996526
HBB	-0.267692	0.195769
RPL17P7	-0.263077	0.203883
GALK1	-0.505385	0.00996526
RPL12P33	0.104615	0.618719
RPS27P13	-0.232308	0.263804
APOBEC3C	0.135385	0.518766
PPP1R21-DT	-0.504615	0.0100976
RBM12	0.214615	0.302913
ETV5	-0.15	0.474197
RPS15AP1	-0.504615	0.0100976
RPL7P23	0.222308	0.285489
RPL30P7	-0.273846	0.185297
EFEMP2	-0.504615	0.0100976
SERF2	-0.504615	0.0100976
GATA2-AS1	0.0376923	0.858035
DBNDD2	0.246154	0.235576
ENSG00000244251	-0.176923	0.397536
ENSG00000244245	-0.264615	0.201154
ENSG00000244192	-0.116923	0.577801
BTG2	-0.503846	0.0102314
PBX2P1	0.333846	0.1029
P2RY11	0.136154	0.516371
EIF4E2P2	0.143077	0.49506
MGP	-0.503846	0.0102314
ENSG00000244151	0.192308	0.357077
CST3	-0.503846	0.0102314
RPS4XP6	0.0823077	0.695698
RPL29	-0.503077	0.0103666
RPL5P24	-0.318462	0.120782
RPS18P6	0.356154	0.0805642
CLEC11A	-0.503077	0.0103666
LINC01011	0.0284615	0.892573
ABCD1	-0.503077	0.0103666
MT1HL1	-0.0715385	0.733995
RPL35P6	-0.0746154	0.722986
ZFPL1	-0.502308	0.0105033
RPL23AP65	-0.251538	0.225159
ZNF512	0.347692	0.0885563
MRPS6	-0.0715385	0.733995
TIPARP-AS1	-0.173846	0.405925
RPL5P17	-0.325385	0.112474
RPL15P17	-0.183077	0.381053
MACROD1	-0.502308	0.0105033
ENSG00000243802	-0.353077	0.0834046
ENSG00000243777	-0.0584615	0.781335
ST13P15	0.0846154	0.687581
RPL29P13	-0.0461538	0.826595
TTC4	0.0423077	0.840857
RPL21P116	-0.276923	0.180209
DUBR	0.0707692	0.736756
RPL31P2	-0.501538	0.0106415
NME2	-0.166923	0.425158
DNAAF10	0.386923	0.0560362
ZNF487	-0.308462	0.133561
ENSG00000243659	0.127692	0.543006
RPL17P22	-0.286923	0.164343
PPP1R16A	-0.501538	0.0106415
RPS26P28	-0.126563	0.546609
UBA52P5	-0.386923	0.0560362
NAA80	-0.286154	0.165528
RPS18P13	-0.0307692	0.883918
TIMM8B	-0.501538	0.0106415
ENSG00000243445	0.186923	0.370953
UBL5P2	-0.500769	0.0107813
ENSG00000243403	-0.186154	0.372961
EFNA4	-0.271538	0.189178
SDHAF2	-0.500769	0.0107813
STMP1	-0.159231	0.447097
RPL31P61	-0.357692	0.0791718
STON1	-0.02	0.924403
ENSG00000243225	-0.178806	0.392451
RPL6P10	-0.121538	0.562769
RPL21P80	-0.132308	0.528399
RPL31P48	-0.138568	0.508889
CNTFR	-0.500769	0.0107813
MAD2L2	-0.500769	0.0107813
RPL21P98	0.147692	0.481101
EIF4EBP3	0.0707692	0.736756
UBA52P3	-0.218462	0.294121
S100A6	-0.5	0.0109225
FTH1P4	-0.269231	0.193114
RPL13AP23	-0.234615	0.258955
FTH1P23	0.0338462	0.872399
ENSG00000242951	-0.138462	0.509219
FLNC-AS1	0.246154	0.235576
MTCO2P22	-0.499231	0.0110653
RN7SL180P	-0.219273	0.292286
RPL13AP14	-0.38	0.0609699
ALDOAP1	-0.233846	0.260565
AP5Z1	0.04	0.849437
ENSG00000242795	-0.373846	0.0656312
NMTRQ-TTG12-1	-0.0671662	0.749728
RPL21P14	-0.178462	0.393378
RTL5	0.103077	0.623916
RPL5P12	-0.0761538	0.7175
ENSG00000242667	-0.0661538	0.753385
GPX4	-0.499231	0.0110653
COL6A2	-0.499231	0.0110653
RPL21P11	-0.277692	0.178952
MRPL2	-0.499231	0.0110653
MRPL20	-0.169231	0.418692
ENSG00000242477	-0.143846	0.49272
RPL7AP11	-0.00923077	0.96507
ENSG00000242411	-0.328462	0.108919
ENSG00000254847	-0.498462	0.0112096
PRDX5P1	-0.268462	0.194438
ENSG00000242327	-0.326154	0.111577
RPL12P32	0.31	0.131534
RPS18P5	-0.216154	0.299377
RNF208	-0.498462	0.0112096
RPL5P3	0.0146154	0.94472
PEG10	0.303846	0.139777
RPL15P7	0.279231	0.176457
C22orf39	0.225385	0.278701
BGLAP	0.183077	0.381053
ARFGAP3	0.38	0.0609699
SNHG3	-0.210769	0.311867
MDFIC2	0.131538	0.530821
RPL9P32	-0.220769	0.288922
RPL7AP6	-0.321538	0.117036
RPS3AP49	0.0176923	0.933105
RPL10P7	-0.215385	0.301142
PRR34-AS1	-0.361538	0.0757707
CD248	-0.498462	0.0112096
HOGA1	-0.01	0.962162
RPL14P3	-0.121538	0.562769
RPS20P4	-0.160769	0.442662
CTDNEP1P1	0.339231	0.0971302
PISD	0.297692	0.148384
C8orf58	-0.104615	0.618719
PLEKHO2	-0.141538	0.499758
ATP5PO	-0.329231	0.108044
EOLA1-DT	0.300769	0.144034
CBLL1-AS1	-0.0815385	0.698411
RPL13AP18	-0.229231	0.27036
RPL7AP30	-0.242308	0.243208
ARPC1A	-0.301538	0.142961
NPDC1	-0.498462	0.0112096
NFKBIA	-0.498462	0.0112096
RPL15P8	-0.133846	0.523572
INMT	-0.2	0.337793
RPS23P6	-0.375385	0.0644409
ARPC4	-0.322308	0.116113
ACTG1P20	0.26174	0.206276
RPS15AP24	-0.321538	0.117036
HEY1	-0.497692	0.0113554
ENSG00000241494	-0.311538	0.129529
NRGN	-0.497692	0.0113554
RPL7P19	0.0830769	0.692989
FBRSL1P1	0.256972	0.214962
EEF1A1P25	0.0307692	0.883918
PDXP	-0.0823077	0.695698
ENSG00000241352	0.190769	0.361011
RPL31P26	-0.290769	0.158511
SLC39A3	-0.497692	0.0113554
ENSG00000241255	-0.0761538	0.7175
CRIPTO	-0.0823235	0.695642
LINC00881	-0.116923	0.577801
YAE1	-0.318462	0.120782
RPL5P1	0.0453846	0.829443
NSUN6	0.209231	0.315494
GAMT	-0.497692	0.0113554
PDLIM2	-0.497692	0.0113554
RPL8P3	-0.323846	0.114283
RPL15P2	-0.146154	0.485731
RPL21P125	0.395385	0.0504337
PTOV1P1	0.0930769	0.658112
RDH14	0.132308	0.528399
PFN1	-0.497692	0.0113554
PEDS1	-0.197692	0.343511
RPL21P4	-0.161538	0.440453
RPL36AP21	-0.156154	0.456037
ARHGEF25	0.259231	0.210818
MT2A	-0.496923	0.0115029
DNAJC8P2	0.346154	0.0900713
MRPL4	-0.496923	0.0115029
C1QTNF9	-0.0315385	0.881036
ENSG00000240652	-0.388462	0.0549832
ENSG00000240634	-0.313846	0.126564
RPS6P25	-0.386923	0.0560362
AQP1	-0.121538	0.562769
RPL3P9	-0.193846	0.35317
PSMB5	-0.496923	0.0115029
RPL34P18	-0.209231	0.315494
INAFM1	-0.496154	0.0116519
PHB1P8	0.104615	0.618719
AKT1S1	-0.496154	0.0116519
RPS26P34	-0.0984615	0.63961
ENSG00000240418	-0.317692	0.121732
MTATP8P1	-0.0561538	0.789773
KLF2	-0.496154	0.0116519
RPL9P3	-0.374615	0.065034
ENSG00000240376	-0.25	0.228103
RPS4XP13	-0.00769231	0.970889
RPL36AP45	-0.298462	0.147288
PPIL3	-0.0892308	0.671449
RPS2P5	-0.313846	0.126564
RPL29P18	0.161538	0.440453
RPL39P3	-0.495385	0.0118025
TCEAL3	-0.495385	0.0118025
PSMD12P1	0.141538	0.499758
RPSAP12	-0.129231	0.538117
STRIT1	-0.296596	0.149957
AMY2B	0.0446154	0.832293
RAB3IL1	-0.495385	0.0118025
STIM2-AS1	0.00461538	0.982531
PRKAG2-AS1	-0.16	0.444876
GPX1P1	-0.494615	0.0119547
C1orf226	0.324615	0.113376
RNF7P1	-0.0230769	0.912813
RPS4XP22	-0.188607	0.366582
DENND6A-AS1	-0.352579	0.0838712
MRPS17	-0.145385	0.488055
WBP1	0.136923	0.513982
RPL21P118	0.363077	0.0744419
ENSG00000239719	-0.32	0.118898
APOBEC3G	0.152308	0.467344
TNFSF12	-0.386154	0.0565685
NME1	-0.188462	0.366957
ENSG00000239622	-0.379231	0.0615381
KMT2E-AS1	-0.0976923	0.642241
ROMO1	-0.494615	0.0119547
ADAP1	-0.494615	0.0119547
RPS14P8	-0.225385	0.278701
ENSG00000239486	-0.16	0.444876
PRMT1	-0.493846	0.0121085
RPL21P97	-0.106154	0.61354
RPL21P15	-0.228462	0.272015
ST3GAL6-AS1	0.337692	0.0987534
DDIT4	-0.493077	0.012264
ENSG00000239393	-0.078522	0.709084
NFKBID	-0.493077	0.012264
ALKBH6	-0.198462	0.341599
UQCC2	-0.493077	0.012264
ENSG00000239344	-0.191538	0.359041
RPL35AP17	-0.106154	0.61354
RBM14	0.248462	0.231073
PSMD8	-0.493077	0.012264
RPL34P31	-0.119231	0.570263
RPL5P22	0.205385	0.324673
SNORD123	-0.0340763	0.871538
SNORD124	0.0795498	0.705441
RNU7-140P	-0.236461	0.255118
RPL31P49	-0.492308	0.0124211
HMG20B	-0.492308	0.0124211
ENSG00000238260	0.313846	0.126564
NSA2P7	0.226154	0.27702
COL9A2	-0.492308	0.0124211
TMEM250	0.170769	0.414412
PSMB10	-0.491538	0.0125798
ENSG00000238165	0.351809	0.0845966
ENSG00000238150	-0.317692	0.121732
RPL7AP66	-0.491538	0.0125798
RPL9P7	0.240769	0.246306
ENSG00000238085	-0.268462	0.194438
ENSG00000238084	0.361538	0.0757707
NUDCP2	0.00769231	0.970889
CDC26P1	-0.0153846	0.941815
TMEM230P2	0.394615	0.0509242
BBLN	-0.491538	0.0125798
RPL10P4	-0.159231	0.447097
PSME2P1	-0.0361538	0.863775
RPL35P1	-0.319231	0.119837
DMAC1	-0.491538	0.0125798
EIF4HP2	-0.204615	0.326528
MTCO1P12	0.336154	0.100397
TUBG1P	-0.130769	0.533247
LINC02918	-0.117692	0.575283
CLIC4P3	0.376154	0.0638521
PDLIM4	-0.491538	0.0125798
ENSG00000237922	0.157692	0.451555
MATR3P3	0.120769	0.565262
RPL29P31	0.0515385	0.806718
RPL23AP32	-0.307692	0.134583
NALT1	-0.304615	0.138727
RPL35AP36	-0.491248	0.0126401
RPL21P123	-0.490769	0.0127403
LINC02984	0.226923	0.275345
FHL3	-0.490769	0.0127403
ENSG00000237774	0.0807692	0.701128
FAM200B	-0.0984615	0.63961
BANF1P3	-0.144615	0.490385
SLC20A1-DT	0.343846	0.0923801
RPS27P9	-0.06	0.775723
UQCRBP1	-0.163846	0.433862
COMMD1	-0.490769	0.0127403
NDUFAF2	-0.490769	0.0127403
ATP5PFP1	-0.306154	0.136643
SCIRT	0.04	0.849437
HM13	-0.490769	0.0127403
S100A11P1	-0.10502	0.617355
UQCRHP2	0.266923	0.197106
UQCR10P1	-0.0246629	0.906845
UNC5B-AS1	-0.161538	0.440453
RPSAP15	-0.0738462	0.725733
ENSG00000237493	0.258462	0.212223
LRRC52-AS1	-0.233846	0.260565
CAMTA1-DT	0.169231	0.418692
RPSAP11	0.102308	0.626521
ENSG00000237429	0.0869231	0.679498
ENSG00000237377	-0.0846154	0.687581
ARL2	-0.49	0.0129024
LINC03011	-0.351538	0.0848528
TTN-AS1	0.0792308	0.706571
NAA38	-0.49	0.0129024
CDKN2AIPNL	-0.18	0.389245
ENSG00000237176	-0.174615	0.403819
B3GNT9	-0.0138462	0.947625
CHID1	-0.49	0.0129024
TAGLN2	-0.49	0.0129024
ENSG00000237015	-0.368462	0.0699303
NDUFS8	-0.49	0.0129024
ENSG00000213087	-0.489231	0.0130662
GAPDHP21	-0.0830769	0.692989
RPL12P12	-0.323077	0.115195
HPCAL1	-0.489231	0.0130662
ENSG00000236942	-0.02	0.924403
ZNF688	-0.488462	0.0132317
ENSG00000236887	-0.178462	0.393378
ENSG00000185641	-0.488462	0.0132317
NIFK-AS1	0.352308	0.0841264
SSBL2P	0.203077	0.330257
RBKS	-0.488462	0.0132317
GAPDHP2	-0.344615	0.0916056
RPL24P8	-0.258462	0.212223
ENSG00000236779	0.00153846	0.994177
ENSG00000236773	0.0869231	0.679498
RPL17P16	-0.137692	0.511597
COX7A2P2	-0.162308	0.43825
RPL19P16	-0.254615	0.219347
LINC01186	-0.38	0.0609699
THOC6	-0.488462	0.0132317
RPL31P63	-0.154615	0.460543
MAP3K2-DT	-0.280769	0.173986
ENSG00000236654	0.15503	0.459327
UBA5P1	0.316154	0.123648
PITPNA-AS1	-0.366154	0.0718375
ZNF853	-0.02	0.924403
SGK1	-0.488462	0.0132317
RPL13AP5	-0.386154	0.0565685
RPS12P4	-0.283131	0.170239
GPS2P1	0.184615	0.376995
PKMP1	0.133077	0.525983
EEF1A1P44	-0.211538	0.310063
SBDSP1	-0.487692	0.0133989
COPRSP1	0	1
RPS27P8	-0.164615	0.431677
VLDLR-AS1	0.336154	0.100397
DDX11L2	-0.366154	0.0718375
WDR18	-0.487692	0.0133989
RPL5P9	-0.19	0.362987
ENSG00000236319	0.246154	0.235576
RPL34P34	-0.123846	0.55532
MRPL41	-0.486923	0.0135679
NDUFB9P2	-0.152308	0.467344
ENSG00000236266	-0.0253846	0.904131
PPP1R11P1	0.216154	0.299377
C10orf71-AS1	0.0807692	0.701128
MICOS13	-0.486923	0.0135679
PRADC1P1	0.197692	0.343511
MRPS36P1	-0.323077	0.115195
TMEM147-AS1	0.297692	0.148384
TEX264	-0.486923	0.0135679
RPL17P36	0.0753846	0.720241
ZNF787	-0.486923	0.0135679
NSA2P1	-0.0684615	0.745057
LINC02941	-0.0853846	0.684883
TGFB1I1	-0.486923	0.0135679
PNMA6A	-0.137692	0.511597
COX7CP1	-0.117692	0.575283
TTC28-AS1	0.343077	0.0931594
ASH1L-AS1	-0.0207692	0.921504
MRPS18CP7	0.0792308	0.706571
ENSG00000235912	-0.158462	0.449323
RBMS3-AS3	-0.0884615	0.674128
ENSG00000235859	0.214615	0.302913
LDHAP7	0.161538	0.440453
SRGAP3-AS4	-0.252308	0.223696
[truncated: 11,736 more rows]
