# Supplementary material for: Endothelial RNF20 suppresses endothelial-to-mesenchymal transition and safeguards physiological angiocrine signaling to prevent congenital heart disease
Source: Nat Commun. 2025 Oct 27;16:9480. doi: 10.1038/s41467-025-65291-0 (PMC12559710; doi:10.1038/s41467-025-65291-0)
Supplement: Supplementary file 10 — Supplementary Data 7 [file 41467_2025_65291_MOESM10_ESM.xlsx]

## Sheet: Sheet1
Supplementary Data 7. SD1 and SD2 represent short- and long-term beating rate variability in Poincaré plots of rat cardiomyocytes co-cultured with HUVECs following silencing with different siRNAs.
	SD1	SD2				SD1	SD2				SD1	SD2
siControl1	0.048	0.032			siControl1	0.0535	0.0378			Control OE 1	0.0824	0.0845
siControl2	0.173	0.171			siControl2	0.0378	0.0443			Control OE 2	0.1031	0.075
siControl3	0.1233	0.1306			siControl3	0.0527	0.0535			Control OE 3	0.076	0.1
siRNF20-1	0.702	0.315			siRNF20-1	1.313	1.082			NPPA OE 1	0.165	0.18
siRNF20-2	0.853	0.758			siRNF20-2	1.14	0.81			NPPA OE 2	0.141	0.12
siRNF20-3	0.529	0.534			siRNF20-3	0.611	0.589			NPPA OE 3	0.132	0.112
siRNF20/siNPPA 1	0.173	0.173			siRNF20/siSMAD2&SMAD3 1	0.0535	0.0378			MIF OE 1	0.298	0.193
siRNF20/siNPPA 2	0.041	0.041			siRNF20/siSMAD2&SMAD3 2	0.0525	0.535			MIF OE 2	0.267	0.362
siRNF20/siNPPA 3	0.0577	0.07			siRNF20/siSMAD2&SMAD3 3	0.1363	0.0982			MIF OE 3	0.137	0.141
siRNF20/siCOLmix 1	0.126	0.096
siRNF20/siCOLmix 2	0.1871	0.0882			p value	SD1	SD2			p value	SD1	SD2
siRNF20/siCOLmix 3	0.065	0.076			siRNF20 vs siControl	0.0042	0.012			NPPA OE vs Control OE	0.0101	0.0883
					siRNF20/siSMAD2&SMAD3 vs siControl	0.9971	0.7151			MIF OE vs Control OE	0.0425	0.096
p value	SD1	SD2			siRNF20/siSMAD2&SMAD3 vs siRNF20	0.0049	0.0385
siRNF20 vs siControl	0.0005	0.0134
siRNF20/siNPPA vs siControl	0.9994	0.9999
siRNF20/siCOLmix vs siControl	0.9999	0.9998
siRNF20/siNPPA vs siRNF20	0.0004	0.0107
siRNF20/siCOLmix vs siRNF20	0.0005	0.0097
Statistical analysis between multiple groups was performed using one-way-ANOVA with Šídák's correction
