# Supplementary material for: Endothelial RNF20 suppresses endothelial-to-mesenchymal transition and safeguards physiological angiocrine signaling to prevent congenital heart disease
Source: Nat Commun. 2025 Oct 27;16:9480. doi: 10.1038/s41467-025-65291-0 (PMC12559710; doi:10.1038/s41467-025-65291-0)
Supplement: Supplementary file 11 — Supplementary Data 8 [file 41467_2025_65291_MOESM11_ESM.xlsx]

## Sheet: Primers
Supplementary Data 8. Primers used in this study. qPCR primers were designed in-house using NCBI Primer-BLAST and synthesized by Sigma-Aldrich.
qPCR Primers
Primer name	sequence	species
Tuba1a_F	GAAGCAGCAACCATGCGTGA	Human
Tuba1a_R	CCTCCCCCAATGGTCTTGTC
RNF20_F	CGGGCCTTGGAAAACGA	Human
RNF20_R	AACAGCTGCCTTCTTCTCAGG
GLUT1_F	GTGGCCTTCTTTGAAGTGGG	Human
GLUT1_R	AAGACGTAGGGACCACACAG
PDK1_F	CTGTGATACGGATCAGAAACCG	Human
PDK1_R	TCCACCAAACAATAAAGAGTGCT
LOX-F	TGTCCTCCGCTCCACTCT	Human
LOX-R	GCCCTGTATGCTGTACTGGC
TGFB1-F	ACCTGCCACAGATCCCCTAT	Human
TGFB1-R	GAGCAACACGGGTTCAGGTA
TGFBR2-F	CTCCTGTGCAGCTTCCCTC	Human
TGFBR2-R	CTGCACCGTTGTTGTCAGTG
THBS1-F	CTGTGGAGGAGGGGTACAGA	Human
THBS1-R	GCAGATGATGCCATTGCCAG
CCL2-F	AGCAGCAAGTGTCCCAAAGA	Human
CCL2-R	GGTGTCTGGGGAAAGCTAGG
GAPDH (human)_F	CCTGTTCGACAGTCAGCC	Human
GAPDH (human)_R	CGACCAAATCCGTTGACTCC
m18S-f	ACCGCAGCTAGGAATAATGGA	Mouse
m18S-r	CAAATGCTTTCGCTCTGGTC
Tuba1a_1_F	CCGCGAAGCAGCAACCAT	Mouse
Tuba1a_1_R	CCAGGTCTACGAACACTGCC
Rnf20_F	CTCTTCAACGGAGGAATTAG	Mouse
Rnf20_R	CCTGCCGCTGATCTAGCATT
Rnf40_F	CTCAGGACCCCCAGAGAAGA	Mouse
Rnf40_R	TCCTCCGTGGAAGAAATGCC
ChIP qPCR Primers
Primer name	sequence	species
H2Bub_ChIP_q_LDLR-F	CAGTGCCAAGACGGGAAATG	Human
H2Bub_ChIP_q_LDLR-R	CACGTCTCCTGGGACTCATC
H2Bub_ChIP_q_VEGFC-F	GCAGTTACGGTCTGTGTCCA
H2Bub_ChIP_q_VEGFC-R	CCTTGAGTTGAGGTTGGCCT
H2Bub_ChIP_q_ZYX-F	CCCCTGACTCTGAAGGAGGTG
H2Bub_ChIP_q_ZYX-R	TCTGAGGATGCTCCATGTCC
H2Bub_ChIP_q_IGF2_F	CCAAATTATCGTGGTGGCCC
H2Bub_ChIP_q_IGF2_R	GTGCGTCTAAGTAGCTCGCC
H2Bub_ChIP_q_NRG1_F	ACCATTACCTTGAACCTTCCTGA
H2Bub_ChIP_q_NRG1_R	AAGCTGTTTGTGGTCTCACT
Pol II_ChIP_q_TGFB1-TSS-F	CTTCAAAACCCCCTGCCGA
Pol II_ChIP_q_TGFB1-TSS-R	GGAGGTGGGAGGGAGATGG
Pol II_ChIP_q_TGFB1-GB-F	GCTGTCCAGGCAAGAAATGG
Pol II_ChIP_q_TGFB1-GB-R	GACAATCACTGGGTGTGGGG
Pol II_ChIP_q_TGFBR2-TSS-F	GAACTCCTGAGTGGTGTGGG
Pol II_ChIP_q_TGFBR2-TSS-R	AGGAAACTCCTCGCCAACAG
Pol II_ChIP_q_TGFBR2-GB-F	TGGTCCTACTGTGGGCCTTA
Pol II_ChIP_q_TGFBR2-GB-R	ATCTTGTATAGGATGAGGCTTGTAA
Pol II_ChIP_q_THBS1-TSS-F	GAGTTCAGGGCTCCTGTCG
Pol II_ChIP_q_THBS1-TSS-R	GGGCGACTTACCTGTGTGTA
Pol II_ChIP_q_THBS1-GB-F	GGGCAGCCGTGCTTATATTTT
Pol II_ChIP_q_THBS1-GB-R	AATCCTTCAGCCAGATCTTCCA
Pol II_ChIP_q_CCL2-TSS-F	GCCCGCTTTCAATAAGAGGC
Pol II_ChIP_q_CCL2-TSS-R	AGAAGAGGGGGCCTTACCTG
Pol II_ChIP_q_CCL2-GB-F	TGGAGTAATACAGACACTGCCA
Pol II_ChIP_q_CCL2-GB-R	CCTCCAGGTATTTGCTCCCA
Genotyping Primers
Primer name	sequence	species
Rnf20 5' arm	CTAGCAGTATGGTGGAGCCTCAGG	Mouse
Rnf20 3' arm	CTTAACCGAGACTAAGGACACAGC
Rnf20 LAR3	CAACGGGTTCTTCTGTTAGTCC
Cdh5-Cre (VE) R	CGGTGCTAACCAGCGTTTTCGTT
Cdh5-Cre (VE) F	AAGAACCTGATGGACATGTTCAG
Isl1-F	ACTATTTGCCACCTAGCCACAGCA
Isl1-(384)-R	AATTCACACCAAACATGCAAGCTG
Isl1-Cre-Jes-R	CTAGAGCCTGTTTTGCACGTTC
